# Supplementary material
Source: Research Square preprint supplement (doi:10.21203/rs.3.rs-5177030/v1)
Supplement: Supplementary file 2 [file 4dd7ae453c396006a4a3435e.pdf]

| Probe | Chemical Structure                                                                  | Probe-derived modification (PDM)                                                    | PDM tagged with DMP                                                                  | Residue | Molecular formula                                               | Theoretical mass | Determined mass | p.p.m.   |
|-------|-------------------------------------------------------------------------------------|-------------------------------------------------------------------------------------|--------------------------------------------------------------------------------------|---------|-----------------------------------------------------------------|------------------|-----------------|----------|
| IPM   | 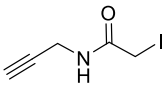   |    |    | C       | C <sub>16</sub> H <sub>26</sub> N <sub>6</sub> O <sub>2</sub>   | 334.212          | 334.211936      | 0.191495 |
| ENE   |    |    |    | C       | C <sub>19</sub> H <sub>31</sub> N <sub>5</sub> O <sub>2</sub>   | 361.248          | 361.247984      | 0.044291 |
| NPM   |    |    |    | C       | C <sub>18</sub> H <sub>26</sub> N <sub>6</sub> O <sub>3</sub>   | 374.207          | 374.206833      | 0.446277 |
|       |                                                                                     |    |    | C       | C <sub>18</sub> H <sub>28</sub> N <sub>6</sub> O <sub>4</sub>   | 392.217          | 392.217324      | 0.826073 |
| PPMS  |  |  |  | C       | C <sub>14</sub> H <sub>23</sub> N <sub>5</sub> O <sub>S</sub>   | 309.162          | 309.162492      | 1.591396 |
| VSF   |  |  |  | C       | C <sub>18</sub> H <sub>31</sub> N <sub>5</sub> O <sub>3</sub> S | 397.215          | 397.214913      | 0.219025 |

|            |                                                                                     |                                                                                     |                                                                                      |   |             |         |            |          |
|------------|-------------------------------------------------------------------------------------|-------------------------------------------------------------------------------------|--------------------------------------------------------------------------------------|---|-------------|---------|------------|----------|
| <b>NHS</b> | 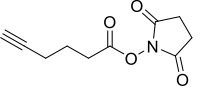   |    |    | K | C17H27N5O2  | 333.216 | 333.216616 | 1.848647 |
| <b>STP</b> |    |    |    | K | C16H25N5O2  | 319.201 | 319.201086 | 0.269423 |
| <b>1</b>   |    |    |    | C | C17H28N6O2  | 348.227 | 348.226821 | 0.514033 |
| <b>2</b>   |    |    |    | C | C16H26N6O2  | 334.212 | 334.212189 | 0.565509 |
| <b>3</b>   |   |   |   | C | C16H28N6O3S | 384.194 | 384.194074 | 0.192611 |
| <b>4</b>   |  |  |  | C | C17H26N6O2  | 346.212 | 346.211568 | 1.247792 |

|   |                                                                                    |                                                                                    |                                                                                     |   |            |         |            |          |
|---|------------------------------------------------------------------------------------|------------------------------------------------------------------------------------|-------------------------------------------------------------------------------------|---|------------|---------|------------|----------|
| 5 | 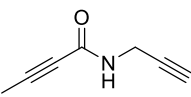  |   |   | C | C18H28N6O2 | 360.227 | 360.222279 | 13.1058  |
| 6 |   |   |   | C | C21H29N5O2 | 383.232 | 383.232662 | 1.727410 |
| 7 |   |   |   | C | C22H30N6O3 | 426.238 | 426.238631 | 1.480391 |
| 8 |  |  |  | C | C18H28N6O4 | 392.217 | 392.217276 | 0.703692 |

|    |                                                                                     |                                                                                     |                                                                                      |   |            |         |            |          |
|----|-------------------------------------------------------------------------------------|-------------------------------------------------------------------------------------|--------------------------------------------------------------------------------------|---|------------|---------|------------|----------|
| 9  | 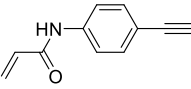   |    |    | C | C22H30N6O2 | 410.243 | 410.243582 | 1.418669 |
| 10 |    |    |    | C | C23H32N6O2 | 424.259 | 424.258998 | 0.004714 |
| 11 |    |    |    | C | C16H26N6O2 | 334.212 | 334.211816 | 0.550549 |
| 12 |   |   |   | C | C17H28N6O2 | 348.227 | 348.22717  | 0.488187 |
| 13 |  |  |  | C | C16H26N6O2 | 334.212 | 334.211819 | 0.541573 |

|    |                                                                                     |                                                                                     |                                                                                      |   |              |         |            |          |
|----|-------------------------------------------------------------------------------------|-------------------------------------------------------------------------------------|--------------------------------------------------------------------------------------|---|--------------|---------|------------|----------|
|    |                                                                                     | 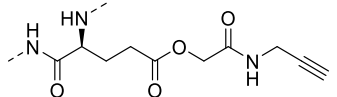   |    | E | C16H26N6O2   | 334.212 | 334.211819 | 0.541573 |
| 14 |    |    |    | C | C18H27F3N6O2 | 416.215 | 416.214821 | 0.430066 |
| 15 |    |    |    | K | C20H27N9O2   | 425.229 | 425.228992 | 0.018813 |
| 16 |  |   |   | C | C16H26N6O    | 334.212 | 334.212081 | 0.242361 |
|    |                                                                                     |  |  | E | C16H26N6O    | 334.212 | 334.212081 | 0.242361 |

|    |                                                                                    |                                                                                     |                                                                                      |   |                                                                |         |            |          |
|----|------------------------------------------------------------------------------------|-------------------------------------------------------------------------------------|--------------------------------------------------------------------------------------|---|----------------------------------------------------------------|---------|------------|----------|
| 17 | 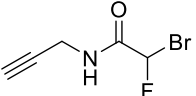  |    |    | C | C <sub>16</sub> H <sub>25</sub> FN <sub>6</sub> O <sub>2</sub> | 352.202 | 352.202218 | 0.618963 |
|    |                                                                                    |    |    | H | C <sub>16</sub> H <sub>26</sub> N <sub>6</sub> O <sub>2</sub>  | 332.196 | 332.196094 | 0.282965 |
| 18 |  |    |    | C | C <sub>23</sub> H <sub>31</sub> N <sub>5</sub> O <sub>4</sub>  | 441.238 | 441.238627 | 1.421000 |
|    |                                                                                    |   |   | H | C <sub>23</sub> H <sub>31</sub> N <sub>5</sub> O <sub>4</sub>  | 441.238 | 441.238627 | 1.421000 |
|    |                                                                                    |  |  | K | C <sub>23</sub> H <sub>29</sub> N <sub>5</sub> O <sub>3</sub>  | 423.227 | 423.22761  | 1.441305 |

|    |                                                                                     |                                                                                     |                                                                                      |   |            |         |            |          |
|----|-------------------------------------------------------------------------------------|-------------------------------------------------------------------------------------|--------------------------------------------------------------------------------------|---|------------|---------|------------|----------|
| 19 | 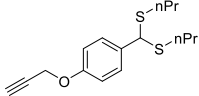   |    |    | K | C21H27N5O3 | 397.211 | 397.212016 | 2.557828 |
| 20 |    |    |    | K | C22H27N7O3 | 437.218 | 437.21722  | 1.78401  |
| 21 |    |    |    | C | C23H40N6O3 | 416.344 | 416.344658 | 1.580421 |
| 22 |   |   |   | K | C26H36N6O2 | 464.290 | 464.289821 | 0.385535 |
| 23 |  |  |  | K | C24H32N6O2 | 436.259 | 436.25756  | 3.300802 |

|    |                                                                                     |                                                                                     |                                                                                      |   |            |         |            |          |
|----|-------------------------------------------------------------------------------------|-------------------------------------------------------------------------------------|--------------------------------------------------------------------------------------|---|------------|---------|------------|----------|
| 24 | 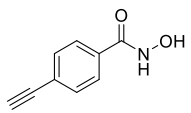   |    |    | K | C20H26N6O2 | 382.212 | 382.211935 | 0.170063 |
| 25 |    |    |    | C | C21H28N6O3 | 412.222 | 412.222921 | 2.234228 |
| 26 |    |    |    | E | C28H34N8O2 | 514.281 | 514.280278 | 1.403904 |
|    |    |   |   | D | C28H34N8O2 | 514.281 | 514.280278 | 1.403904 |
| 27 |  |  |  | E | C18H32N6O  | 348.264 | 348.26432  | 0.918842 |

|    |                                                                                     |                                                                                     |                                                                                      |   |             |         |            |          |
|----|-------------------------------------------------------------------------------------|-------------------------------------------------------------------------------------|--------------------------------------------------------------------------------------|---|-------------|---------|------------|----------|
|    | 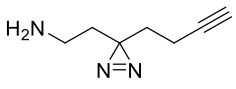   |    |    | D | C18H32N6O   | 348.264 | 348.26432  | 0.918842 |
| 28 |    |    |    | C | C22H31N7O2  | 425.253 | 425.253893 | 2.099922 |
| 29 |    |    |    | K | C21H27N5O3  | 397.211 | 397.211773 | 1.946065 |
| 30 |  |   |   | K | C17H24ClN9O | 405.179 | 405.179908 | 2.24098  |
|    |                                                                                     |  |  | C | C17H24ClN9O | 405.179 | 405.179908 | 2.240980 |

|    |  |  |  |   |             |         |            |          |
|----|--|--|--|---|-------------|---------|------------|----------|
|    |  |  |  | Y | C17H24ClN9O | 405.179 | 405.179908 | 2.240980 |
| 31 |  |  |  | Y | C19H25N5O3S | 403.168 | 403.167674 | 0.808597 |
|    |  |  |  | K | C19H25N5O3S | 403.168 | 403.167674 | 0.808597 |
| 32 |  |  |  | K | C23H29N5O3  | 423.227 | 423.228288 | 3.043275 |
| 33 |  |  |  | K | C16H25N5O2  | 319.201 | 319.201162 | 0.507517 |

|    |                                                                                     |                                                                                     |                                                                                      |   |            |            |            |          |
|----|-------------------------------------------------------------------------------------|-------------------------------------------------------------------------------------|--------------------------------------------------------------------------------------|---|------------|------------|------------|----------|
| 34 | 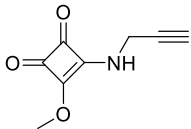   |    |    | K | C18H24N6O3 | 372.191    | 372.191319 | 0.857086 |
| 35 |    |    |    | K | C16H25N5O2 | 319.201    | 319.201331 | 1.036963 |
|    |                                                                                     |    |    | C | C16H25N5O2 | 319.201331 | 319.201331 | 1.036963 |
| 36 |    |    |    | K | C15H24N6O2 | 320.196    | 320.196345 | 1.077464 |
| 37 |  |  |   | K | C18H29N5O2 | 347.232    | 347.232039 | 0.112317 |
|    |                                                                                     |  |  | C | C18H29N5O2 | 347.232    | 347.232039 | 0.112317 |

|    |                                                                                     |                                                                                     |                                                                                      |   |              |         |            |          |
|----|-------------------------------------------------------------------------------------|-------------------------------------------------------------------------------------|--------------------------------------------------------------------------------------|---|--------------|---------|------------|----------|
| 38 | 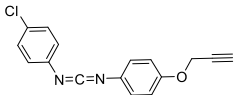   |    |    | K | C27H32ClN7O2 | 521.231 | 521.231414 | 0.794273 |
|    |                                                                                     |    |    | E | C20H26N5O2   | 368.232 | 368.233022 | 2.775424 |
| 39 |    |    |    | E | C25H37N7O2   | 467.301 | 467.301698 | 1.493682 |
|    |                                                                                     |   |   | E | C20H27N5O2   | 368.232 | 368.233022 | 2.775424 |
| 40 |  |  |  | C | C22H35N5O3   | 417.274 | 417.27497  | 2.324606 |

|    |                                                                                     |                                                                                     |                                                                                      |   |            |         |            |          |
|----|-------------------------------------------------------------------------------------|-------------------------------------------------------------------------------------|--------------------------------------------------------------------------------------|---|------------|---------|------------|----------|
|    |                                                                                     | 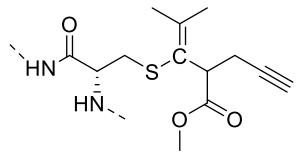   |    | C | C21H33N5O3 | 403.258 | 403.258814 | 2.018555 |
| 41 |    |    |    | C | C24H30N6O3 | 450.238 | 450.240224 | 4.939585 |
| 42 |    |    |    | K | C21H25N5O4 | 411.191 | 411.190907 | 0.226172 |
|    |                                                                                     |   |   | K | C21H23N5O3 | 393.180 | 393.181864 | 4.740809 |
| 43 |  |  |  | C | C23H28N6O2 | 420.227 | 420.228508 | 3.588524 |

|    |                                                                                     |                                                                                     |                                                                                      |   |            |         |            |           |
|----|-------------------------------------------------------------------------------------|-------------------------------------------------------------------------------------|--------------------------------------------------------------------------------------|---|------------|---------|------------|-----------|
| 44 | 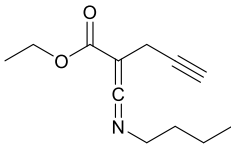   | uncharacterized                                                                     | uncharacterized                                                                      | C | C21H31N5O3 | 401.242 | 401.243145 | -2.853640 |
| 45 |    | uncharacterized                                                                     | uncharacterized                                                                      | C | C21H31N5O3 | 401.242 | 401.245134 | -2.853640 |
| 46 |    |    |    | C | C23H30N6O2 | 422.243 | 422.243748 | 1.771489  |
| 47 |  |   |   | K | C16H25N5O2 | 319.201 | 319.200652 | 1.090223  |
|    |                                                                                     |  |  | C | C16H25N5O2 | 319.201 | 319.200652 | 1.090223  |

|    |                                                                                    |                                                                                     |                                                                                      |   |            |         |            |          |
|----|------------------------------------------------------------------------------------|-------------------------------------------------------------------------------------|--------------------------------------------------------------------------------------|---|------------|---------|------------|----------|
| 48 | 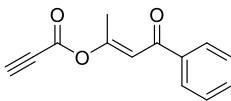  |    |    | K | C14H21N5O2 | 291.170 | 291.168374 | 5.584398 |
| 49 |   |    |    | K | C20H25N5O2 | 367.201 | 367.20062  | 1.034857 |
|    |                                                                                    |    |    | C | C20H25N5O2 | 367.201 | 367.20062  | 1.034857 |
| 50 |  |    |    | K | C21H27N5O2 | 381.216 | 381.216217 | 0.569231 |
|    |                                                                                    |  |  | C | C21H27N5O2 | 381.216 | 381.216217 | 0.569231 |

|    |                                                                                     |                                                                                     |                                                                                      |   |             |         |            |          |
|----|-------------------------------------------------------------------------------------|-------------------------------------------------------------------------------------|--------------------------------------------------------------------------------------|---|-------------|---------|------------|----------|
| 51 | 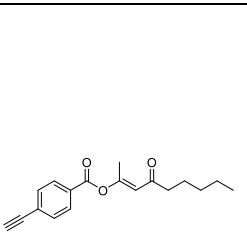   |    |    | K | C20H25N5O2  | 367.201 | 367.2004   | 1.633985 |
|    |                                                                                     |    |    | C | C20H25N5O2  | 367.201 | 367.2004   | 1.633985 |
| 52 |    |    |    | K | C16H25N5O2  | 319.201 | 319.198955 | 6.406663 |
|    |                                                                                     |   |   | C | C16H25N5O2  | 319.201 | 319.198955 | 6.406663 |
| 53 |  |  |  | C | C22H30N6O3S | 458.210 | 458.210484 | 1.056283 |

|    |                                                                                     |                                                                                     |                                                                                      |   |                                                                 |         |            |          |
|----|-------------------------------------------------------------------------------------|-------------------------------------------------------------------------------------|--------------------------------------------------------------------------------------|---|-----------------------------------------------------------------|---------|------------|----------|
| 54 | 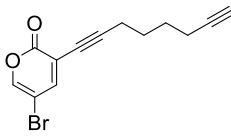   |    |    | C | C <sub>24</sub> H <sub>32</sub> BrN <sub>5</sub> O <sub>3</sub> | 517.169 | 517.170439 | 2.782448 |
| 55 |    |    |    | H | C <sub>22</sub> H <sub>31</sub> N <sub>5</sub> O <sub>3</sub>   | 413.243 | 413.243627 | 1.517265 |
|    |                                                                                     |    |    | C | C <sub>22</sub> H <sub>31</sub> N <sub>5</sub> O <sub>3</sub>   | 413.243 | 413.243627 | 1.517265 |
| 56 |  |   |   | K | C <sub>20</sub> H <sub>25</sub> N <sub>5</sub> O <sub>2</sub>   | 367.201 | 367.200973 | 0.073529 |
|    |                                                                                     |  |  | C | C <sub>20</sub> H <sub>25</sub> N <sub>5</sub> O <sub>2</sub>   | 367.201 | 367.200973 | 0.073529 |

|    |                                                                                     |                                                                                     |                                                                                     |        |            |         |            |          |
|----|-------------------------------------------------------------------------------------|-------------------------------------------------------------------------------------|-------------------------------------------------------------------------------------|--------|------------|---------|------------|----------|
|    |                                                                                     | 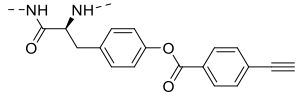   |   | Y      | C20H25N5O2 | 367.201 | 367.200973 | 0.073529 |
| 57 |    |    |   | K      | C20H25N5O2 | 367.201 | 367.200973 | 0.073529 |
|    |                                                                                     |    |   | C      | C20H25N5O2 | 367.201 | 367.200973 | 0.073529 |
|    |                                                                                     |    |   | Y      | C20H25N5O2 | 367.201 | 367.200973 | 0.073529 |
|    |                                                                                     |                                                                                     |                                                                                     |        |            |         |            |          |
| 58 |  |  |  | N-site | C21H28N6O3 | 412.222 | 412.222465 | 1.128032 |

|    |                                                                                   |                                                                                   |                                                                                    |        |            |         |            |          |
|----|-----------------------------------------------------------------------------------|-----------------------------------------------------------------------------------|------------------------------------------------------------------------------------|--------|------------|---------|------------|----------|
| 59 | 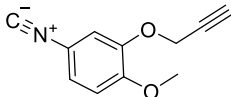 |  |  | N-site | C22H30N6O4 | 442.233 | 442.233451 | 1.019823 |
| 60 |  |  |  | K      | C24H33N7O3 | 467.264 | 467.260407 | 7.689502 |
| 61 |  |  |  | K      | C27H31N7O2 | 485.254 | 485.254367 | 0.756304 |
