# Supplementary material
Source: Research Square preprint supplement (doi:10.21203/rs.3.rs-5177030/v1)
Supplement: Supplementary file 4 [file 4d348a049fcb082a77726f7a.xlsx]

## Sheet: Legends
Supplementary Data 4. Quantitative reactivity profiling of proteomic histidines. For the sheet named ’10-1’, lysates from HEK293T cells were labeled with 100 µM and 10 µM CEAlkyne, respectively, and subjected to tryptic digestion. The probe-modified peptides were further conjugated to light and heavy azido biotin reagents with a photocleavable linker, respectively, via CuAAC. The light and heavy …
Headers Table
Leading Ac	Uniprot protein identifiers of mapped protein
Site	Probe binding site position in protein
Genename	Gene names
Description	Protein names
All ratio repeat	The Ratio (H/L) for a modified sequence in each of the four replicates
All SD Ratio	The standard deviation of Ratios for different spectrum of a modified sequence in each of the four replicates
Ratio average	The mean Ratio (H/L) between four replications
Ratio SD	The standard deviation of Ratios between four replications
CV	Coefficient of variation between four replicates

## Sheet: 10-1
Leading AC	Site	Genename	Description	All ratio repeat1	All ratio repeat2	All ratio repeat3	All ratio repeat4	All SD Ratio	Ratio average	Ratio SD	CV
Q86UY5	214	FAM83A	FA83A_HUMAN Protein FAM83A OS=Homo sapiens OX=9606 GN=FAM83A PE=1 SV=1		11.27			|NA||	11.27	NA	#VALUE!
P31040	60	SDHA	SDHA_HUMAN Succinate dehydrogenase [ubiquinone] flavoprotein subunit, mitochondrial OS=Homo sapiens OX=9606 GN=SDHA PE=1 SV=2				7	|||NA	7	NA	#VALUE!
P43487	8	RANBP1	RANG_HUMAN Ran-specific GTPase-activating protein OS=Homo sapiens OX=9606 GN=RANBP1 PE=1 SV=1	10.8	5.89	1.28		NA|NA|NA|	5.99	4.76079	79.479
Q9UNP9	206	PPIE	PPIE_HUMAN Peptidyl-prolyl cis-trans isomerase E OS=Homo sapiens OX=9606 GN=PPIE PE=1 SV=1	6.35	4.84			NA|NA||	5.595	1.06773	19.0836
Q6NX49	626	ZNF544	ZN544_HUMAN Zinc finger protein 544 OS=Homo sapiens OX=9606 GN=ZNF544 PE=1 SV=1	5.21				0.0|||	5.21	NA	#VALUE!
Q01105	47	SET	SET_HUMAN Protein SET OS=Homo sapiens OX=9606 GN=SET PE=1 SV=3		4.84			|0.48083||	4.84	NA	#VALUE!
Q86Y38	859	XYLT1	XYLT1_HUMAN Xylosyltransferase 1 OS=Homo sapiens OX=9606 GN=XYLT1 PE=1 SV=1				4.55	|||NA	4.55	NA	#VALUE!
P49736	686	MCM2	MCM2_HUMAN DNA replication licensing factor MCM2 OS=Homo sapiens OX=9606 GN=MCM2 PE=1 SV=4		4.39			|NA||	4.39	NA	#VALUE!
Q9Y6Y8	892	SEC23IP	S23IP_HUMAN SEC23-interacting protein OS=Homo sapiens OX=9606 GN=SEC23IP PE=1 SV=1		4.37			|0.0||	4.37	NA	#VALUE!
Q6FI13	83	H2AC18	H2A2A_HUMAN Histone H2A type 2-A OS=Homo sapiens OX=9606 GN=H2AC18 PE=1 SV=3		4.11			|0.66539||	4.11	NA	#VALUE!
Q00610	309	CLTC	CLH1_HUMAN Clathrin heavy chain 1 OS=Homo sapiens OX=9606 GN=CLTC PE=1 SV=5	4.09				NA|||	4.09	NA	#VALUE!
P04908	83	H2AC4	H2A1B_HUMAN Histone H2A type 1-B/E OS=Homo sapiens OX=9606 GN=H2AC4 PE=1 SV=2	3.95	4.11			1.03874|0.66539||	4.03	0.11314	2.80744
P22626	126	HNRNPA2B1	ROA2_HUMAN Heterogeneous nuclear ribonucleoproteins A2/B1 OS=Homo sapiens OX=9606 GN=HNRNPA2B1 PE=1 SV=2	4.42	7.64	1.65	2.05	1.83848|NA|0.55585|0.306	3.94	2.75297	69.8723
P09651	119	HNRNPA1	ROA1_HUMAN Heterogeneous nuclear ribonucleoprotein A1 OS=Homo sapiens OX=9606 GN=HNRNPA1 PE=1 SV=5	4.42	7.64	1.65	2.05	1.83848|NA|0.55585|0.306	3.94	2.75297	69.8723
P62937	70	PPIA	PPIA_HUMAN Peptidyl-prolyl cis-trans isomerase A OS=Homo sapiens OX=9606 GN=PPIA PE=1 SV=2	6.35	4.84	2.45	1.9	NA|NA|0.62362|NA	3.885	2.08068	53.5568
P09936	185	UCHL1	UCHL1_HUMAN Ubiquitin carboxyl-terminal hydrolase isozyme L1 OS=Homo sapiens OX=9606 GN=UCHL1 PE=1 SV=2		3.86			|NA||	3.86	NA	#VALUE!
P12956	545	XRCC6	XRCC6_HUMAN X-ray repair cross-complementing protein 6 OS=Homo sapiens OX=9606 GN=XRCC6 PE=1 SV=2	3.78				NA|||	3.78	NA	#VALUE!
Q15233	248	NONO	NONO_HUMAN Non-POU domain-containing octamer-binding protein OS=Homo sapiens OX=9606 GN=NONO PE=1 SV=4		3.78			|NA||	3.78	NA	#VALUE!
Q96EY4	95	TMA16	TMA16_HUMAN Translation machinery-associated protein 16 OS=Homo sapiens OX=9606 GN=TMA16 PE=1 SV=2	3.72				NA|||	3.72	NA	#VALUE!
Q02880	151	TOP2B	TOP2B_HUMAN DNA topoisomerase 2-beta OS=Homo sapiens OX=9606 GN=TOP2B PE=1 SV=3		3.71			|NA||	3.71	NA	#VALUE!
P11388	130	TOP2A	TOP2A_HUMAN DNA topoisomerase 2-alpha OS=Homo sapiens OX=9606 GN=TOP2A PE=1 SV=3		3.71			|NA||	3.71	NA	#VALUE!
P84098	58	RPL19	RL19_HUMAN 60S ribosomal protein L19 OS=Homo sapiens OX=9606 GN=RPL19 PE=1 SV=1			3.44	3.96	||0.60468|NA	3.7	0.3677	9.93784
P61201	413	COPS2	CSN2_HUMAN COP9 signalosome complex subunit 2 OS=Homo sapiens OX=9606 GN=COPS2 PE=1 SV=1	3.63	3.75			NA|NA||	3.69	0.08485	2.29946
Q9NYF8	428	BCLAF1	BCLF1_HUMAN Bcl-2-associated transcription factor 1 OS=Homo sapiens OX=9606 GN=BCLAF1 PE=1 SV=2		3.69			|NA||	3.69	NA	#VALUE!
Q71UI9	44	H2AZ2	H2AV_HUMAN Histone H2A.V OS=Homo sapiens OX=9606 GN=H2AZ2 PE=1 SV=3	4.36		3.31	3.09	NA||NA|0.0	3.58667	0.6787	18.9228
P09874	934	PARP1	PARP1_HUMAN Poly [ADP-ribose] polymerase 1 OS=Homo sapiens OX=9606 GN=PARP1 PE=1 SV=4		4.47	3.02	3.24	|NA|NA|NA	3.57667	0.78143	21.848
Q07666	438	KHDRBS1	KHDR1_HUMAN KH domain-containing, RNA-binding, signal transduction-associated protein 1 OS=Homo sapiens OX=9606 GN=KHDRBS1 PE=1 SV=1	4.18	4.09	2.3	3.65	NA|NA|NA|0.60811	3.555	0.86812	24.4197
O14745	72	SLC9A3R1	NHRF1_HUMAN Na(+)/H(+) exchange regulatory cofactor NHE-RF1 OS=Homo sapiens OX=9606 GN=SLC9A3R1 PE=1 SV=4	4.89		2.2		NA||NA|	3.545	1.90212	53.6564
P27708	1121	CAD	PYR1_HUMAN CAD protein OS=Homo sapiens OX=9606 GN=CAD PE=1 SV=3	5.105			1.985	2.65165|||0.84146	3.545	2.20617	62.2333
O15417	2276	TNRC18	TNC18_HUMAN Trinucleotide repeat-containing gene 18 protein OS=Homo sapiens OX=9606 GN=TNRC18 PE=1 SV=3		3.53			|NA||	3.53	NA	#VALUE!
P27635	86	RPL10	RL10_HUMAN 60S ribosomal protein L10 OS=Homo sapiens OX=9606 GN=RPL10 PE=1 SV=4		3.53			|NA||	3.53	NA	#VALUE!
P62333	323	PSMC6	PRS10_HUMAN 26S proteasome regulatory subunit 10B OS=Homo sapiens OX=9606 GN=PSMC6 PE=1 SV=1		5.385		1.66	|4.06586||0.4423	3.5225	2.63397	74.7756
Q99417	51	MYCBP	MYCBP_HUMAN c-Myc-binding protein OS=Homo sapiens OX=9606 GN=MYCBP PE=1 SV=3	4.62	3.55	3.47	2.43	NA|NA|NA|0.18385	3.5175	0.8947	25.4357
Q12906	170	ILF3	ILF3_HUMAN Interleukin enhancer-binding factor 3 OS=Homo sapiens OX=9606 GN=ILF3 PE=1 SV=3	4.565	4.205	2.48	2.81	1.17263|1.276|0.45|NA	3.515	1.02418	29.1374
O00273	173	DFFA	DFFA_HUMAN DNA fragmentation factor subunit alpha OS=Homo sapiens OX=9606 GN=DFFA PE=1 SV=1	3.49				NA|||	3.49	NA	#VALUE!
Q71UI9	86	H2AZ2	H2AV_HUMAN Histone H2A.V OS=Homo sapiens OX=9606 GN=H2AZ2 PE=1 SV=3	3.95	4.11	2.92	2.95	1.03874|0.66539|0.67272|0.82451	3.4825	0.63568	18.2536
P16104	83	H2AX	H2AX_HUMAN Histone H2AX OS=Homo sapiens OX=9606 GN=H2AX PE=1 SV=2	3.95	4.11	2.92	2.95	1.03874|0.66539|0.67272|0.82451	3.4825	0.63568	18.2536
P61313	156	RPL15	RL15_HUMAN 60S ribosomal protein L15 OS=Homo sapiens OX=9606 GN=RPL15 PE=1 SV=2			3.47		||NA|	3.47	NA	#VALUE!
Q92945	486	KHSRP	FUBP2_HUMAN Far upstream element-binding protein 2 OS=Homo sapiens OX=9606 GN=KHSRP PE=1 SV=4				3.47	|||0.15556	3.47	NA	#VALUE!
P09651	156	HNRNPA1	ROA1_HUMAN Heterogeneous nuclear ribonucleoprotein A1 OS=Homo sapiens OX=9606 GN=HNRNPA1 PE=1 SV=5			4.08	2.79	||0.82561|0.65957	3.435	0.91217	26.5552
P38159	248	RBMX	RBMX_HUMAN RNA-binding motif protein, X chromosome OS=Homo sapiens OX=9606 GN=RBMX PE=1 SV=3				3.43	|||NA	3.43	NA	#VALUE!
Q92499	271	DDX1	DDX1_HUMAN ATP-dependent RNA helicase DDX1 OS=Homo sapiens OX=9606 GN=DDX1 PE=1 SV=2		4.79		2.06	|NA||0.27429	3.425	1.9304	56.362
P17987	534	TCP1	TCPA_HUMAN T-complex protein 1 subunit alpha OS=Homo sapiens OX=9606 GN=TCP1 PE=1 SV=1		3.38			|NA||	3.38	NA	#VALUE!
Q9H5H4	283	ZNF768	ZN768_HUMAN Zinc finger protein 768 OS=Homo sapiens OX=9606 GN=ZNF768 PE=1 SV=2		3.38			|NA||	3.38	NA	#VALUE!
Q86WZ6	570	ZNF227	ZN227_HUMAN Zinc finger protein 227 OS=Homo sapiens OX=9606 GN=ZNF227 PE=1 SV=1		3.38			|NA||	3.38	NA	#VALUE!
O75153	952	CLUH	CLU_HUMAN Clustered mitochondria protein homolog OS=Homo sapiens OX=9606 GN=CLUH PE=1 SV=2	2.19	4.55			NA|NA||	3.37	1.66877	49.5184
P14618	439	PKM	KPYM_HUMAN Pyruvate kinase PKM OS=Homo sapiens OX=9606 GN=PKM PE=1 SV=4	3.79	4.15	2.915	2.62	0.34588|NA|0.3823|0.4001	3.36875	0.7198	21.367
Q9HBE1	369	PATZ1	PATZ1_HUMAN POZ-, AT hook-, and zinc finger-containing protein 1 OS=Homo sapiens OX=9606 GN=PATZ1 PE=1 SV=1		3.64		3.09	|NA||NA	3.365	0.38891	11.5575
P48735	348	IDH2	IDHP_HUMAN Isocitrate dehydrogenase [NADP], mitochondrial OS=Homo sapiens OX=9606 GN=IDH2 PE=1 SV=2	3.36				NA|||	3.36	NA	#VALUE!
P61221	13	ABCE1	ABCE1_HUMAN ATP-binding cassette sub-family E member 1 OS=Homo sapiens OX=9606 GN=ABCE1 PE=1 SV=1	3.36				NA|||	3.36	NA	#VALUE!
P48643	147	CCT5	TCPE_HUMAN T-complex protein 1 subunit epsilon OS=Homo sapiens OX=9606 GN=CCT5 PE=1 SV=1	2.85	3.53		3.66	1.14551|NA||NA	3.34667	0.43501	12.9983
O00507	451	USP9Y	USP9Y_HUMAN Probable ubiquitin carboxyl-terminal hydrolase FAF-Y OS=Homo sapiens OX=9606 GN=USP9Y PE=2 SV=2	3.33				NA|||	3.33	NA	#VALUE!
Q16777	83	H2AC20	H2A2C_HUMAN Histone H2A type 2-C OS=Homo sapiens OX=9606 GN=H2AC20 PE=1 SV=4		4.11	2.92	2.95	|0.66539|0.67272|0.82451	3.32667	0.67855	20.3973
P62081	91	RPS7	RS7_HUMAN 40S ribosomal protein S7 OS=Homo sapiens OX=9606 GN=RPS7 PE=1 SV=1	3.27	3.33		3.36	NA|NA||NA	3.32	0.04583	1.38042
P35244	35	RPA3	RFA3_HUMAN Replication protein A 14 kDa subunit OS=Homo sapiens OX=9606 GN=RPA3 PE=1 SV=1	3.06	4.31	2.56		NA|1.68291|NA|	3.31	0.90139	27.2323
P30041	39	PRDX6	PRDX6_HUMAN Peroxiredoxin-6 OS=Homo sapiens OX=9606 GN=PRDX6 PE=1 SV=3			3.3		||NA|	3.3	NA	#VALUE!
Q9Y678	457	COPG1	COPG1_HUMAN Coatomer subunit gamma-1 OS=Homo sapiens OX=9606 GN=COPG1 PE=1 SV=1				3.3	|||NA	3.3	NA	#VALUE!
Q9Y2W1	676	THRAP3	TR150_HUMAN Thyroid hormone receptor-associated protein 3 OS=Homo sapiens OX=9606 GN=THRAP3 PE=1 SV=2	3.29				NA|||	3.29	NA	#VALUE!
Q9NYF8	652	BCLAF1	BCLF1_HUMAN Bcl-2-associated transcription factor 1 OS=Homo sapiens OX=9606 GN=BCLAF1 PE=1 SV=2	3.29				NA|||	3.29	NA	#VALUE!
Q13595	49	TRA2A	TRA2A_HUMAN Transformer-2 protein homolog alpha OS=Homo sapiens OX=9606 GN=TRA2A PE=1 SV=1		3.29			|NA||	3.29	NA	#VALUE!
P08574	107	CYC1	CY1_HUMAN Cytochrome c1, heme protein, mitochondrial OS=Homo sapiens OX=9606 GN=CYC1 PE=1 SV=3	5.23	2.84	2.83	2.24	NA|0.0|2.39575|1.71941	3.285	1.32666	40.3854
P41250	682	GARS1	GARS_HUMAN Glycine--tRNA ligase OS=Homo sapiens OX=9606 GN=GARS1 PE=1 SV=3		3.28			|NA||	3.28	NA	#VALUE!
Q93077	83	H2AC6	H2A1C_HUMAN Histone H2A type 1-C OS=Homo sapiens OX=9606 GN=H2AC6 PE=1 SV=3	3.95		2.92	2.95	1.03874||0.67272|0.82451	3.27333	0.5862	17.9084
O75027	588	ABCB7	ABCB7_HUMAN ATP-binding cassette sub-family B member 7, mitochondrial OS=Homo sapiens OX=9606 GN=ABCB7 PE=1 SV=2		3.27			|NA||	3.27	NA	#VALUE!
Q9Y285	327	FARSA	SYFA_HUMAN Phenylalanine--tRNA ligase alpha subunit OS=Homo sapiens OX=9606 GN=FARSA PE=1 SV=3	3.26				NA|||	3.26	NA	#VALUE!
P11586	167	MTHFD1	C1TC_HUMAN C-1-tetrahydrofolate synthase, cytoplasmic OS=Homo sapiens OX=9606 GN=MTHFD1 PE=1 SV=3	4.26	3.85	1.49	3.405	2.04042|0.18385|1.20402|2.00111	3.25125	1.22498	37.6772
P12236	106	SLC25A6	ADT3_HUMAN ADP/ATP translocase 3 OS=Homo sapiens OX=9606 GN=SLC25A6 PE=1 SV=4			3.25		||NA|	3.25	NA	#VALUE!
P62807	83	H2BC4	H2B1C_HUMAN Histone H2B type 1-C/E/F/G/I OS=Homo sapiens OX=9606 GN=H2BC4 PE=1 SV=4		3.67		2.82	|0.17785||0.15469	3.245	0.60104	18.522
Q16778	83	H2BC21	H2B2E_HUMAN Histone H2B type 2-E OS=Homo sapiens OX=9606 GN=H2BC21 PE=1 SV=3		3.67		2.82	|0.17785||0.15469	3.245	0.60104	18.522
Q15393	985	SF3B3	SF3B3_HUMAN Splicing factor 3B subunit 3 OS=Homo sapiens OX=9606 GN=SF3B3 PE=1 SV=4		4.58	2.065	3.08	|NA|0.55861|NA	3.24167	1.26527	39.0314
Q86UP2	917	KTN1	KTN1_HUMAN Kinectin OS=Homo sapiens OX=9606 GN=KTN1 PE=1 SV=1	4.16	3.67		1.86	1.83848|NA||0.23094	3.23	1.21149	37.5074
P49792	2155	RANBP2	RBP2_HUMAN E3 SUMO-protein ligase RanBP2 OS=Homo sapiens OX=9606 GN=RANBP2 PE=1 SV=2	3.23				NA|||	3.23	NA	#VALUE!
P17844	372	DDX5	DDX5_HUMAN Probable ATP-dependent RNA helicase DDX5 OS=Homo sapiens OX=9606 GN=DDX5 PE=1 SV=1		3.23			|NA||	3.23	NA	#VALUE!
P33991	430	MCM4	MCM4_HUMAN DNA replication licensing factor MCM4 OS=Homo sapiens OX=9606 GN=MCM4 PE=1 SV=5	5.62		2.22	1.83	NA||NA|0.43301	3.22333	2.08471	64.6757
Q96FW1	247	OTUB1	OTUB1_HUMAN Ubiquitin thioesterase OTUB1 OS=Homo sapiens OX=9606 GN=OTUB1 PE=1 SV=2	0.95	5.48			NA|NA||	3.215	3.20319	99.6327
B9VXM8	928	UL70	PRIM_HCMVT DNA primase OS=Human cytomegalovirus (strain Towne) OX=10363 GN=UL70 PE=1 SV=1	3.13	3.91	2.59		NA|NA|NA|	3.21	0.66363	20.6738
Q6DN03	83	H2BC20P	H2B2C_HUMAN Putative histone H2B type 2-C OS=Homo sapiens OX=9606 GN=H2BC20P PE=5 SV=3	3.38	3.67	2.95	2.82	0.86014|0.17785|0.26202|0.15469	3.205	0.39162	12.219
O76021	86	RSL1D1	RL1D1_HUMAN Ribosomal L1 domain-containing protein 1 OS=Homo sapiens OX=9606 GN=RSL1D1 PE=1 SV=3	4.38	2.71	2.73	3	1.738|1.59193|0.34013|0.64458	3.205	0.79442	24.7869
P62805	76	H4C1	H4_HUMAN Histone H4 OS=Homo sapiens OX=9606 GN=H4C1 PE=1 SV=2	4.29	4.27	2.205	2.04	0.90388|1.3002|0.37011|0.24768	3.20125	1.24748	38.9685
P62841	137	RPS15	RS15_HUMAN 40S ribosomal protein S15 OS=Homo sapiens OX=9606 GN=RPS15 PE=1 SV=2	3.47	4.98	2.13	2.185	NA|0.5374|NA|0.5869	3.19125	1.34364	42.1039
P40926	158	MDH2	MDHM_HUMAN Malate dehydrogenase, mitochondrial OS=Homo sapiens OX=9606 GN=MDH2 PE=1 SV=3	2.75	4.86	2.315	2.795	NA|NA|0.19092|0.82731	3.18	1.14072	35.8717
P02765	313	AHSG	FETUA_HUMAN Alpha-2-HS-glycoprotein OS=Homo sapiens OX=9606 GN=AHSG PE=1 SV=2	3.7	3.435	2.75	2.83	1.78231|0.80318|0.81912|0.18347	3.17875	0.4629	14.5623
P62277	58	RPS13	RS13_HUMAN 40S ribosomal protein S13 OS=Homo sapiens OX=9606 GN=RPS13 PE=1 SV=2	3.77	4.14	2.475	2.31	1.19303|1.60827|0.13435|0.18475	3.17375	0.91715	28.898
P62826	48	RAN	RAN_HUMAN GTP-binding nuclear protein Ran OS=Homo sapiens OX=9606 GN=RAN PE=1 SV=3	4.88	2.5		2.14	1.27594|0.0||0.61729	3.17333	1.48894	46.9204
Q12906	37	ILF3	ILF3_HUMAN Interleukin enhancer-binding factor 3 OS=Homo sapiens OX=9606 GN=ILF3 PE=1 SV=3				3.17	|||NA	3.17	NA	#VALUE!
Q93077	125	H2AC6	H2A1C_HUMAN Histone H2A type 1-C OS=Homo sapiens OX=9606 GN=H2AC6 PE=1 SV=3	2.695		2.78	4	1.19115||0.68646|0.8903	3.15833	0.73014	23.1179
Q86XI2	454	NCAPG2	CNDG2_HUMAN Condensin-2 complex subunit G2 OS=Homo sapiens OX=9606 GN=NCAPG2 PE=1 SV=1		3.15			|NA||	3.15	NA	#VALUE!
O14654	556	IRS4	IRS4_HUMAN Insulin receptor substrate 4 OS=Homo sapiens OX=9606 GN=IRS4 PE=1 SV=1		4.08		2.21	|NA||NA	3.145	1.32229	42.0442
P41567	32	EIF1	EIF1_HUMAN Eukaryotic translation initiation factor 1 OS=Homo sapiens OX=9606 GN=EIF1 PE=1 SV=1	4.08	4.22	1.67	2.58	NA|NA|0.17396|0.0	3.1375	1.22807	39.1417
Q9NYF8	591	BCLAF1	BCLF1_HUMAN Bcl-2-associated transcription factor 1 OS=Homo sapiens OX=9606 GN=BCLAF1 PE=1 SV=2	3.72	3.685	2		NA|0.0495|NA|	3.135	0.98309	31.3585
O60264	656	SMARCA5	SMCA5_HUMAN SWI/SNF-related matrix-associated actin-dependent regulator of chromatin subfamily A member 5 OS=Homo sapiens OX=9606 GN=SMARCA5 PE=1 SV=1		2.42		3.82	|NA||NA	3.12	0.98995	31.7292
P09273	290	ORF15	MB43_VZVD Membrane protein UL43 homolog OS=Varicella-zoster virus (strain Dumas) OX=10338 GN=ORF15 PE=3 SV=1		3.12			|NA||	3.12	NA	#VALUE!
Q14684	206	RRP1B	RRP1B_HUMAN Ribosomal RNA processing protein 1 homolog B OS=Homo sapiens OX=9606 GN=RRP1B PE=1 SV=3	5.54	0.69			NA|NA||	3.115	3.42947	110.095
P08238	205	HSP90AB1	HS90B_HUMAN Heat shock protein HSP 90-beta OS=Homo sapiens OX=9606 GN=HSP90AB1 PE=1 SV=4	3.4	3.85	2.605	2.6	0.27223|1.16803|0.77783|0.70989	3.11375	0.61827	19.8561
P07900	490	HSP90AA1	HS90A_HUMAN Heat shock protein HSP 90-alpha OS=Homo sapiens OX=9606 GN=HSP90AA1 PE=1 SV=5	3.75	3.17	2.86	2.665	1.08598|0.58909|0.26482|0.35374	3.11125	0.47389	15.2315
O76021	343	RSL1D1	RL1D1_HUMAN Ribosomal L1 domain-containing protein 1 OS=Homo sapiens OX=9606 GN=RSL1D1 PE=1 SV=3	4.14	3.43		1.74	NA|NA||NA	3.10333	1.2329	39.7283
P12956	486	XRCC6	XRCC6_HUMAN X-ray repair cross-complementing protein 6 OS=Homo sapiens OX=9606 GN=XRCC6 PE=1 SV=2	4.63	3.38	1.92	2.475	1.79896|0.14142|0.66794|0.83994	3.10125	1.18354	38.1633
Q16531	522	DDB1	DDB1_HUMAN DNA damage-binding protein 1 OS=Homo sapiens OX=9606 GN=DDB1 PE=1 SV=1	3.62	3.12	2.74	2.925	0.40942|0.59897|0.59785|0.51392	3.10125	0.37904	12.2222
P35579	1183	MYH9	MYH9_HUMAN Myosin-9 OS=Homo sapiens OX=9606 GN=MYH9 PE=1 SV=4	2.93	3.27			NA|NA||	3.1	0.24042	7.75548
Q99733	50	NAP1L4	NP1L4_HUMAN Nucleosome assembly protein 1-like 4 OS=Homo sapiens OX=9606 GN=NAP1L4 PE=1 SV=1		3.1			|NA||	3.1	NA	#VALUE!
Q9Y678	165	COPG1	COPG1_HUMAN Coatomer subunit gamma-1 OS=Homo sapiens OX=9606 GN=COPG1 PE=1 SV=1	4.11	2.08			0.0|NA||	3.095	1.43543	46.379
P61313	201	RPL15	RL15_HUMAN 60S ribosomal protein L15 OS=Homo sapiens OX=9606 GN=RPL15 PE=1 SV=2	3.35	3.88	2.53	2.61	1.5252|0.76846|0.34429|1.15038	3.0925	0.64179	20.7531
Q9BZE4	37	GTPBP4	NOG1_HUMAN Nucleolar GTP-binding protein 1 OS=Homo sapiens OX=9606 GN=GTPBP4 PE=1 SV=3		3.09			|NA||	3.09	NA	#VALUE!
P52701	1351	MSH6	MSH6_HUMAN DNA mismatch repair protein Msh6 OS=Homo sapiens OX=9606 GN=MSH6 PE=1 SV=2		3.09			|NA||	3.09	NA	#VALUE!
P41091	325	EIF2S3	IF2G_HUMAN Eukaryotic translation initiation factor 2 subunit 3 OS=Homo sapiens OX=9606 GN=EIF2S3 PE=1 SV=3				3.09	|||NA	3.09	NA	#VALUE!
P63167	41	DYNLL1	DYL1_HUMAN Dynein light chain 1, cytoplasmic OS=Homo sapiens OX=9606 GN=DYNLL1 PE=1 SV=1	3.59	3.99	2.44	2.33	NA|NA|0.73896|0.28537	3.0875	0.82867	26.8395
P0DMV9	227	HSPA1B	HS71B_HUMAN Heat shock 70 kDa protein 1B OS=Homo sapiens OX=9606 GN=HSPA1B PE=1 SV=1	4.32	4.16	2.045	1.82	0.9568|1.69684|0.58378|0.35031	3.08625	1.337	43.3212
P34931	229	HSPA1L	HS71L_HUMAN Heat shock 70 kDa protein 1-like OS=Homo sapiens OX=9606 GN=HSPA1L PE=1 SV=2	4.32	4.16	2.045	1.82	0.9568|1.69684|0.58378|0.35031	3.08625	1.337	43.3212
P17066	229	HSPA6	HSP76_HUMAN Heat shock 70 kDa protein 6 OS=Homo sapiens OX=9606 GN=HSPA6 PE=1 SV=2	4.32	4.16	2.045	1.82	0.9568|1.69684|0.58378|0.35031	3.08625	1.337	43.3212
O75643	1288	SNRNP200	U520_HUMAN U5 small nuclear ribonucleoprotein 200 kDa helicase OS=Homo sapiens OX=9606 GN=SNRNP200 PE=1 SV=2		5.49	1.54	2.22	|NA|NA|0.14142	3.08333	2.11178	68.4902
P62899	34	RPL31	RL31_HUMAN 60S ribosomal protein L31 OS=Homo sapiens OX=9606 GN=RPL31 PE=1 SV=1	3.755	3.52	2.52	2.53	0.82417|1.01151|0.58294|0.59231	3.08125	0.64944	21.0772
P49755	35	TMED10	TMEDA_HUMAN Transmembrane emp24 domain-containing protein 10 OS=Homo sapiens OX=9606 GN=TMED10 PE=1 SV=2	3.08				0.19849|||	3.08	NA	#VALUE!
P08238	171	HSP90AB1	HS90B_HUMAN Heat shock protein HSP 90-beta OS=Homo sapiens OX=9606 GN=HSP90AB1 PE=1 SV=4	3.78	3.865	2.22	2.41	1.27259|1.14878|0.2655|0.62235	3.06875	0.87449	28.4966
Q99832	117	CCT7	TCPH_HUMAN T-complex protein 1 subunit eta OS=Homo sapiens OX=9606 GN=CCT7 PE=1 SV=2	3.06				NA|||	3.06	NA	#VALUE!
Q9Y617	19	PSAT1	SERC_HUMAN Phosphoserine aminotransferase OS=Homo sapiens OX=9606 GN=PSAT1 PE=1 SV=2		3.06			|NA||	3.06	NA	#VALUE!
Q9UQ80	147	PA2G4	PA2G4_HUMAN Proliferation-associated protein 2G4 OS=Homo sapiens OX=9606 GN=PA2G4 PE=1 SV=3			3.06		||NA|	3.06	NA	#VALUE!
P07237	256	P4HB	PDIA1_HUMAN Protein disulfide-isomerase OS=Homo sapiens OX=9606 GN=P4HB PE=1 SV=3	2.65	3.12	3.21	3.25	NA|NA|0.14142|0.21197	3.0575	0.27705	9.06132
Q14739	527	LBR	LBR_HUMAN Delta(14)-sterol reductase LBR OS=Homo sapiens OX=9606 GN=LBR PE=1 SV=2		3.92		2.19	|NA||NA	3.055	1.22329	40.0422
O60814	83	H2BC12	H2B1K_HUMAN Histone H2B type 1-K OS=Homo sapiens OX=9606 GN=H2BC12 PE=1 SV=3	3.38		2.95	2.82	0.86014||0.26202|0.15469	3.05	0.29309	9.60951
P06899	83	H2BC11	H2B1J_HUMAN Histone H2B type 1-J OS=Homo sapiens OX=9606 GN=H2BC11 PE=1 SV=3	3.38		2.95	2.82	0.86014||0.26202|0.15469	3.05	0.29309	9.60951
Q15738	201	NSDHL	NSDHL_HUMAN Sterol-4-alpha-carboxylate 3-dehydrogenase, decarboxylating OS=Homo sapiens OX=9606 GN=NSDHL PE=1 SV=2		3.05			|0.0||	3.05	NA	#VALUE!
P26583	117	HMGB2	HMGB2_HUMAN High mobility group protein B2 OS=Homo sapiens OX=9606 GN=HMGB2 PE=1 SV=2	4.14	4.315	1.7	2.03	0.37863|1.18089|0.3659|0.19832	3.04625	1.37249	45.0551
Q14697	678	GANAB	GANAB_HUMAN Neutral alpha-glucosidase AB OS=Homo sapiens OX=9606 GN=GANAB PE=1 SV=3	3.84	3.37		1.92	0.60041|0.44844||0.79538	3.04333	1.00082	32.8857
P60174	186	TPI1	TPIS_HUMAN Triosephosphate isomerase OS=Homo sapiens OX=9606 GN=TPI1 PE=1 SV=4		4.61		1.47	|NA||NA	3.04	2.22032	73.0368
O43390	437	HNRNPR	HNRPR_HUMAN Heterogeneous nuclear ribonucleoprotein R OS=Homo sapiens OX=9606 GN=HNRNPR PE=1 SV=1	3.19	4.34	2.42	2.2	1.52178|0.14142|0.66399|0.27592	3.0375	0.96652	31.8196
Q15233	14	NONO	NONO_HUMAN Non-POU domain-containing octamer-binding protein OS=Homo sapiens OX=9606 GN=NONO PE=1 SV=4	2.87			3.19	NA|||0.0	3.03	0.22627	7.46766
Q8TD19	51	NEK9	NEK9_HUMAN Serine/threonine-protein kinase Nek9 OS=Homo sapiens OX=9606 GN=NEK9 PE=1 SV=2		3.03			|NA||	3.03	NA	#VALUE!
Q12906	320	ILF3	ILF3_HUMAN Interleukin enhancer-binding factor 3 OS=Homo sapiens OX=9606 GN=ILF3 PE=1 SV=3	3.83	4.515	1.64	2.115	0.61493|0.23216|0.31886|0.21339	3.025	1.36802	45.2238
Q86V81	152	ALYREF	THOC4_HUMAN THO complex subunit 4 OS=Homo sapiens OX=9606 GN=ALYREF PE=1 SV=3	4.01		2.03		NA||NA|	3.02	1.40007	46.3599
Q9NR30	249	DDX21	DDX21_HUMAN Nucleolar RNA helicase 2 OS=Homo sapiens OX=9606 GN=DDX21 PE=1 SV=5		3.02			|NA||	3.02	NA	#VALUE!
P61254	18	RPL26	RL26_HUMAN 60S ribosomal protein L26 OS=Homo sapiens OX=9606 GN=RPL26 PE=1 SV=1	3.28	3.585	2.72	2.46	0.91344|1.54571|0.71508|0.76056	3.01125	0.5132	17.0428
Q14566	556	MCM6	MCM6_HUMAN DNA replication licensing factor MCM6 OS=Homo sapiens OX=9606 GN=MCM6 PE=1 SV=1	3.23	4.42	1.35		NA|NA|NA|	3	1.54787	51.5957
P04843	83	RPN1	RPN1_HUMAN Dolichyl-diphosphooligosaccharide--protein glycosyltransferase subunit 1 OS=Homo sapiens OX=9606 GN=RPN1 PE=1 SV=1	3				NA|||	3	NA	#VALUE!
P06748	30	NPM1	NPM_HUMAN Nucleophosmin OS=Homo sapiens OX=9606 GN=NPM1 PE=1 SV=2	3.63	3.72	2.545	2.1	1.31989|0.33813|0.44876|0.82022	2.99875	0.80256	26.7632
Q5BKZ1	40	ZNF326	ZN326_HUMAN DBIRD complex subunit ZNF326 OS=Homo sapiens OX=9606 GN=ZNF326 PE=1 SV=2		2.99			|NA||	2.99	NA	#VALUE!
Q9Y3D9	146	MRPS23	RT23_HUMAN 28S ribosomal protein S23, mitochondrial OS=Homo sapiens OX=9606 GN=MRPS23 PE=1 SV=2	3.55	2.93		2.48	NA|0.0||NA	2.98667	0.53725	17.9883
P62258	107	YWHAE	1433E_HUMAN 14-3-3 protein epsilon OS=Homo sapiens OX=9606 GN=YWHAE PE=1 SV=1	3.85	4.275	2.08	1.74	1.58805|1.57868|1.02838|0.4868	2.98625	1.26245	42.2754
Q00610	1502	CLTC	CLH1_HUMAN Clathrin heavy chain 1 OS=Homo sapiens OX=9606 GN=CLTC PE=1 SV=5	4.37		1.59		NA||NA|	2.98	1.96576	65.9651
P22102	25	GART	PUR2_HUMAN Trifunctional purine biosynthetic protein adenosine-3 OS=Homo sapiens OX=9606 GN=GART PE=1 SV=1		2.98			|NA||	2.98	NA	#VALUE!
Q12874	339	SF3A3	SF3A3_HUMAN Splicing factor 3A subunit 3 OS=Homo sapiens OX=9606 GN=SF3A3 PE=1 SV=1	4.66	3.4	1.89	1.94	NA|0.86267|NA|NA	2.9725	1.32518	44.5813
Q7KZF4	631	SND1	SND1_HUMAN Staphylococcal nuclease domain-containing protein 1 OS=Homo sapiens OX=9606 GN=SND1 PE=1 SV=1	2.97				NA|||	2.97	NA	#VALUE!
P54136	568	RARS1	SYRC_HUMAN Arginine--tRNA ligase, cytoplasmic OS=Homo sapiens OX=9606 GN=RARS1 PE=1 SV=2	4.02			1.92	NA|||NA	2.97	1.48492	49.9973
P52597	318	HNRNPF	HNRPF_HUMAN Heterogeneous nuclear ribonucleoprotein F OS=Homo sapiens OX=9606 GN=HNRNPF PE=1 SV=3	3.65	4.075	2.02	2.11	0.99095|0.71207|0.34086|0.32943	2.96375	1.05283	35.5236
P31943	318	HNRNPH1	HNRH1_HUMAN Heterogeneous nuclear ribonucleoprotein H OS=Homo sapiens OX=9606 GN=HNRNPH1 PE=1 SV=4	3.65	4.075	2.02	2.11	0.99095|0.71207|0.34086|0.32943	2.96375	1.05283	35.5236
Q9H910	107	JPT2	JUPI2_HUMAN Jupiter microtubule associated homolog 2 OS=Homo sapiens OX=9606 GN=JPT2 PE=1 SV=1	3.25		2.67		NA||NA|	2.96	0.41012	13.8554
P11586	847	MTHFD1	C1TC_HUMAN C-1-tetrahydrofolate synthase, cytoplasmic OS=Homo sapiens OX=9606 GN=MTHFD1 PE=1 SV=3	5.95		1.735	1.18	NA||0.50429|0.22121	2.955	2.60855	88.2758
Q9Y3D3	16	MRPS16	RT16_HUMAN 28S ribosomal protein S16, mitochondrial OS=Homo sapiens OX=9606 GN=MRPS16 PE=1 SV=1	1.35	6.18		1.32	0.0|1.36255||0.66229	2.95	2.7973	94.8237
P63261	101	ACTG1	ACTG_HUMAN Actin, cytoplasmic 2 OS=Homo sapiens OX=9606 GN=ACTG1 PE=1 SV=1	4.32	4.31	1.585	1.58	0.90339|1.04134|0.31401|0.25003	2.94875	1.57762	53.5013
P09651	101	HNRNPA1	ROA1_HUMAN Heterogeneous nuclear ribonucleoprotein A1 OS=Homo sapiens OX=9606 GN=HNRNPA1 PE=1 SV=5	4.32	2.79	2.2	2.445	0.19799|1.58392|0.73082|0.10607	2.93875	0.95211	32.3985
P31153	243	MAT2A	METK2_HUMAN S-adenosylmethionine synthase isoform type-2 OS=Homo sapiens OX=9606 GN=MAT2A PE=1 SV=1	4.08	3.83		0.9	NA|NA||NA	2.93667	1.76823	60.2121
P10809	267	HSPD1	CH60_HUMAN 60 kDa heat shock protein, mitochondrial OS=Homo sapiens OX=9606 GN=HSPD1 PE=1 SV=2	3.08	4.52	2.05	2.095	0.38512|0.68828|0.34558|0.57124	2.93625	1.15788	39.434
P25398	28	RPS12	RS12_HUMAN 40S ribosomal protein S12 OS=Homo sapiens OX=9606 GN=RPS12 PE=1 SV=3	3.73	3.65	2.105	2.255	1.89354|0.27048|0.48806|0.58741	2.935	0.87456	29.7976
P62854	17	RPS26	RS26_HUMAN 40S ribosomal protein S26 OS=Homo sapiens OX=9606 GN=RPS26 PE=1 SV=3	3.55	4.015	0.84	3.3	1.13281|0.43745|NA|1.70823	2.92625	1.42204	48.596
O43143	153	DHX15	DHX15_HUMAN Pre-mRNA-splicing factor ATP-dependent RNA helicase DHX15 OS=Homo sapiens OX=9606 GN=DHX15 PE=1 SV=2	3.79	3.625	2.215	2.07	0.29698|0.89803|0.37477|0.48336	2.925	0.90799	31.0424
Q13363	292	CTBP1	CTBP1_HUMAN C-terminal-binding protein 1 OS=Homo sapiens OX=9606 GN=CTBP1 PE=1 SV=2	4.36			1.48	NA|||NA	2.92	2.03647	69.7421
Q08211	376	DHX9	DHX9_HUMAN ATP-dependent RNA helicase A OS=Homo sapiens OX=9606 GN=DHX9 PE=1 SV=4		2.92			|NA||	2.92	NA	#VALUE!
P61313	182	RPL15	RL15_HUMAN 60S ribosomal protein L15 OS=Homo sapiens OX=9606 GN=RPL15 PE=1 SV=2	2.1	2.67	3.18	3.72	0.49016|0.70361|0.41581|0.28084	2.9175	0.69342	23.7676
P11142	227	HSPA8	HSP7C_HUMAN Heat shock cognate 71 kDa protein OS=Homo sapiens OX=9606 GN=HSPA8 PE=1 SV=1	4.39	3.62	1.72	1.93	0.81283|1.53887|0.07234|0.39094	2.915	1.30012	44.601
Q96SB4	211	SRPK1	SRPK1_HUMAN SRSF protein kinase 1 OS=Homo sapiens OX=9606 GN=SRPK1 PE=1 SV=2			2.58	3.24	||NA|NA	2.91	0.46669	16.0375
P36578	41	RPL4	RL4_HUMAN 60S ribosomal protein L4 OS=Homo sapiens OX=9606 GN=RPL4 PE=1 SV=5	3.25	3.68	2.61	2.08	0.43117|0.83601|0.58729|0.81895	2.905	0.70411	24.2379
Q13151	149	HNRNPA0	ROA0_HUMAN Heterogeneous nuclear ribonucleoprotein A0 OS=Homo sapiens OX=9606 GN=HNRNPA0 PE=1 SV=1	1.48			4.33	NA|||NA	2.905	2.01525	69.3718
Q9Y262	387	EIF3L	EIF3L_HUMAN Eukaryotic translation initiation factor 3 subunit L OS=Homo sapiens OX=9606 GN=EIF3L PE=1 SV=1	3.21	3.33		2.17	NA|NA||0.01732	2.90333	0.63791	21.9717
Q00839	631	HNRNPU	HNRPU_HUMAN Heterogeneous nuclear ribonucleoprotein U OS=Homo sapiens OX=9606 GN=HNRNPU PE=1 SV=6	4.1	3.7	1.975	1.83	0.12728|0.57723|0.20775|0.371	2.90125	1.16626	40.1985
P51991	122	HNRNPA3	ROA3_HUMAN Heterogeneous nuclear ribonucleoprotein A3 OS=Homo sapiens OX=9606 GN=HNRNPA3 PE=1 SV=2	4.1	3.3	2.07	2.11	NA|0.96167|0.12702|0.11314	2.895	0.98538	34.0373
P62807	110	H2BC4	H2B1C_HUMAN Histone H2B type 1-C/E/F/G/I OS=Homo sapiens OX=9606 GN=H2BC4 PE=1 SV=4		3.56		2.23	|0.89682||0.14469	2.895	0.94045	32.4853
Q16778	110	H2BC21	H2B2E_HUMAN Histone H2B type 2-E OS=Homo sapiens OX=9606 GN=H2BC21 PE=1 SV=3		3.56		2.23	|0.89682||0.14469	2.895	0.94045	32.4853
A8MWD9	26	SNRPGP15	RUXGL_HUMAN Putative small nuclear ribonucleoprotein G-like protein 15 OS=Homo sapiens OX=9606 GN=SNRPGP15 PE=5 SV=2	2.77	3.9	1.535	3.37	0.61565|0.29759|1.11016|0.22189	2.89375	1.01667	35.1333
Q7Z4W1	28	DCXR	DCXR_HUMAN L-xylulose reductase OS=Homo sapiens OX=9606 GN=DCXR PE=1 SV=2			2.89		||0.0|	2.89	NA	#VALUE!
Q99733	89	NAP1L4	NP1L4_HUMAN Nucleosome assembly protein 1-like 4 OS=Homo sapiens OX=9606 GN=NAP1L4 PE=1 SV=1	2.69	4.5	2.02	2.34	NA|NA|0.19399|0.49359	2.8875	1.10928	38.4166
P55209	100	NAP1L1	NP1L1_HUMAN Nucleosome assembly protein 1-like 1 OS=Homo sapiens OX=9606 GN=NAP1L1 PE=1 SV=1	2.69	4.5	2.02	2.34	NA|NA|0.19399|0.49359	2.8875	1.10928	38.4166
P62750	35	RPL23A	RL23A_HUMAN 60S ribosomal protein L23a OS=Homo sapiens OX=9606 GN=RPL23A PE=1 SV=1			2.88		||NA|	2.88	NA	#VALUE!
P62266	46	RPS23	RS23_HUMAN 40S ribosomal protein S23 OS=Homo sapiens OX=9606 GN=RPS23 PE=1 SV=3	3.185	3.085	2.8	2.435	0.22955|1.01036|0.63451|0.78065	2.87625	0.33636	11.6944
P07900	77	HSP90AA1	HS90A_HUMAN Heat shock protein HSP 90-alpha OS=Homo sapiens OX=9606 GN=HSP90AA1 PE=1 SV=5	3.62	3.69	1.845	2.34	NA|1.19267|0.52868|0.21716	2.87375	0.92491	32.1848
P06730	178	EIF4E	IF4E_HUMAN Eukaryotic translation initiation factor 4E OS=Homo sapiens OX=9606 GN=EIF4E PE=1 SV=2		4.52	1.66	2.435	|NA|0.0|0.52779	2.87167	1.47916	51.5087
Q14697	470	GANAB	GANAB_HUMAN Neutral alpha-glucosidase AB OS=Homo sapiens OX=9606 GN=GANAB PE=1 SV=3	3.43	3.65	1.925	2.45	1.10862|1.79291|0.58917|0.53367	2.86375	0.81471	28.4491
P47914	101	RPL29	RL29_HUMAN 60S ribosomal protein L29 OS=Homo sapiens OX=9606 GN=RPL29 PE=1 SV=2	3.32	3.13	2.675	2.325	2.54492|1.11948|0.71741|0.36077	2.8625	0.44905	15.6873
Q9P0L0	208	VAPA	VAPA_HUMAN Vesicle-associated membrane protein-associated protein A OS=Homo sapiens OX=9606 GN=VAPA PE=1 SV=3	3.32		2.335	2.93	0.29698||0.76788|0.01155	2.86167	0.49604	17.3339
O75694	522	NUP155	NU155_HUMAN Nuclear pore complex protein Nup155 OS=Homo sapiens OX=9606 GN=NUP155 PE=1 SV=1	0.98			4.74	NA|||0.0	2.86	2.65872	92.9622
P54886	142	ALDH18A1	P5CS_HUMAN Delta-1-pyrroline-5-carboxylate synthase OS=Homo sapiens OX=9606 GN=ALDH18A1 PE=1 SV=2		3.69	2.02		|NA|NA|	2.855	1.18087	41.3615
Q14566	408	MCM6	MCM6_HUMAN DNA replication licensing factor MCM6 OS=Homo sapiens OX=9606 GN=MCM6 PE=1 SV=1		4.15	1.56		|NA|NA|	2.855	1.83141	64.1475
P12277	106	CKB	KCRB_HUMAN Creatine kinase B-type OS=Homo sapiens OX=9606 GN=CKB PE=1 SV=1	3.44	3	2.635	2.335	0.39598|NA|0.86974|1.61927	2.8525	0.4768	16.7152
P45877	160	PPIC	PPIC_HUMAN Peptidyl-prolyl cis-trans isomerase C OS=Homo sapiens OX=9606 GN=PPIC PE=1 SV=1	3.17			2.535	0.59564|||0.57327	2.8525	0.44901	15.7409
P53985	227	SLC16A1	MOT1_HUMAN Monocarboxylate transporter 1 OS=Homo sapiens OX=9606 GN=SLC16A1 PE=1 SV=3	3.93	3.665	2.07	1.735	0.29597|0.70004|0.86346|0.32056	2.85	1.10789	38.8733
P62879	311	GNB2	GBB2_HUMAN Guanine nucleotide-binding protein G(I)/G(S)/G(T) subunit beta-2 OS=Homo sapiens OX=9606 GN=GNB2 PE=1 SV=3	3.34	3.925	2.2	1.91	0.2967|0.28991|0.38483|NA	2.84375	0.94898	33.3707
P09429	117	HMGB1	HMGB1_HUMAN High mobility group protein B1 OS=Homo sapiens OX=9606 GN=HMGB1 PE=1 SV=3	3.97	3.66	1.84	1.895	1.03356|0.95593|0.63038|0.39904	2.84125	1.13171	39.8314
P13639	30	EEF2	EF2_HUMAN Elongation factor 2 OS=Homo sapiens OX=9606 GN=EEF2 PE=1 SV=4	2.84				1.0748|||	2.84	NA	#VALUE!
Q16777	124	H2AC20	H2A2C_HUMAN Histone H2A type 2-C OS=Homo sapiens OX=9606 GN=H2AC20 PE=1 SV=4		3.07	2.6	2.85	|0.89095|NA|NA	2.84	0.23516	8.28028
Q8IUE6	124	H2AC21	H2A2B_HUMAN Histone H2A type 2-B OS=Homo sapiens OX=9606 GN=H2AC21 PE=1 SV=3		3.07	2.6	2.85	|0.89095|NA|NA	2.84	0.23516	8.28028
P09874	541	PARP1	PARP1_HUMAN Poly [ADP-ribose] polymerase 1 OS=Homo sapiens OX=9606 GN=PARP1 PE=1 SV=4		2.84			|NA||	2.84	NA	#VALUE!
O75643	170	SNRNP200	U520_HUMAN U5 small nuclear ribonucleoprotein 200 kDa helicase OS=Homo sapiens OX=9606 GN=SNRNP200 PE=1 SV=2		2.84			|NA||	2.84	NA	#VALUE!
P22626	108	HNRNPA2B1	ROA2_HUMAN Heterogeneous nuclear ribonucleoproteins A2/B1 OS=Homo sapiens OX=9606 GN=HNRNPA2B1 PE=1 SV=2		3.68	2.31	2.51	|0.10693|0.0|NA	2.83333	0.74002	26.1184
Q9NQT5	116	EXOSC3	EXOS3_HUMAN Exosome complex component RRP40 OS=Homo sapiens OX=9606 GN=EXOSC3 PE=1 SV=3	2.83				0.0|||	2.83	NA	#VALUE!
P60891	315	PRPS1	PRPS1_HUMAN Ribose-phosphate pyrophosphokinase 1 OS=Homo sapiens OX=9606 GN=PRPS1 PE=1 SV=2	2.83				NA|||	2.83	NA	#VALUE!
P07437	105	TUBB	TBB5_HUMAN Tubulin beta chain OS=Homo sapiens OX=9606 GN=TUBB PE=1 SV=2	3.91	3.83	1.95	1.62	1.02206|1.01006|0.30826|0.37141	2.8275	1.21173	42.8552
Q9BVA1	105	TUBB2B	TBB2B_HUMAN Tubulin beta-2B chain OS=Homo sapiens OX=9606 GN=TUBB2B PE=1 SV=1	3.91	3.83	1.95	1.62	1.02206|1.01006|0.30826|0.37141	2.8275	1.21173	42.8552
P68371	105	TUBB4B	TBB4B_HUMAN Tubulin beta-4B chain OS=Homo sapiens OX=9606 GN=TUBB4B PE=1 SV=1	3.91	3.83	1.95	1.62	1.02206|1.01006|0.30826|0.37141	2.8275	1.21173	42.8552
Q13509	105	TUBB3	TBB3_HUMAN Tubulin beta-3 chain OS=Homo sapiens OX=9606 GN=TUBB3 PE=1 SV=2	3.91	3.83	1.95	1.62	1.02206|1.01006|0.30826|0.37141	2.8275	1.21173	42.8552
P09874	826	PARP1	PARP1_HUMAN Poly [ADP-ribose] polymerase 1 OS=Homo sapiens OX=9606 GN=PARP1 PE=1 SV=4	3.56			2.09	1.5273|||0.40605	2.825	1.03945	36.7947
P12532	329	CKMT1A	KCRU_HUMAN Creatine kinase U-type, mitochondrial OS=Homo sapiens OX=9606 GN=CKMT1A PE=1 SV=1	3.38	3.48	2.105	2.33	0.62225|0.95196|0.7929|0.70411	2.82375	0.70722	25.0454
P12277	296	CKB	KCRB_HUMAN Creatine kinase B-type OS=Homo sapiens OX=9606 GN=CKB PE=1 SV=1	3.38	3.48	2.105	2.33	0.62225|0.95196|0.7929|0.70411	2.82375	0.70722	25.0454
P23284	166	PPIB	PPIB_HUMAN Peptidyl-prolyl cis-trans isomerase B OS=Homo sapiens OX=9606 GN=PPIB PE=1 SV=2	3.17	3.09	2.49	2.535	0.59564|0.76813|0.2984|0.57327	2.82125	0.35848	12.7064
P62937	126	PPIA	PPIA_HUMAN Peptidyl-prolyl cis-trans isomerase A OS=Homo sapiens OX=9606 GN=PPIA PE=1 SV=2	3.17	3.09	2.49	2.535	0.59564|0.76813|0.2984|0.57327	2.82125	0.35848	12.7064
O43447	138	PPIH	PPIH_HUMAN Peptidyl-prolyl cis-trans isomerase H OS=Homo sapiens OX=9606 GN=PPIH PE=1 SV=1	3.17	3.09	2.49	2.535	0.59564|0.76813|0.2984|0.57327	2.82125	0.35848	12.7064
Q99880	83	H2BC13	H2B1L_HUMAN Histone H2B type 1-L OS=Homo sapiens OX=9606 GN=H2BC13 PE=1 SV=3				2.82	|||0.15469	2.82	NA	#VALUE!
Q8N257	83	H2BU1	H2B3B_HUMAN Histone H2B type 3-B OS=Homo sapiens OX=9606 GN=H2BU1 PE=1 SV=3				2.82	|||0.15469	2.82	NA	#VALUE!
P56556	108	NDUFA6	NDUA6_HUMAN NADH dehydrogenase [ubiquinone] 1 alpha subcomplex subunit 6 OS=Homo sapiens OX=9606 GN=NDUFA6 PE=1 SV=4	3.52	3.23	1.695		0.0|NA|0.06364|	2.815	0.98073	34.8394
Q9UNE7	156	STUB1	CHIP_HUMAN E3 ubiquitin-protein ligase CHIP OS=Homo sapiens OX=9606 GN=STUB1 PE=1 SV=2	2.815				1.95869|||	2.815	NA	#VALUE!
P39023	11	RPL3	RL3_HUMAN 60S ribosomal protein L3 OS=Homo sapiens OX=9606 GN=RPL3 PE=1 SV=2	3.275	3.08	2.475	2.43	0.9942|0.66711|0.32588|0.46164	2.815	0.42648	15.1503
P52907	23	CAPZA1	CAZA1_HUMAN F-actin-capping protein subunit alpha-1 OS=Homo sapiens OX=9606 GN=CAPZA1 PE=1 SV=3				2.815	|||1.27986	2.815	NA	#VALUE!
P17987	550	TCP1	TCPA_HUMAN T-complex protein 1 subunit alpha OS=Homo sapiens OX=9606 GN=TCP1 PE=1 SV=1	3.61	4.37	1.57	1.69	1.3799|NA|0.3926|0.09504	2.81	1.39828	49.7609
O43242	477	PSMD3	PSMD3_HUMAN 26S proteasome non-ATPase regulatory subunit 3 OS=Homo sapiens OX=9606 GN=PSMD3 PE=1 SV=2		2.81			|0.12124||	2.81	NA	#VALUE!
Q13330	498	MTA1	MTA1_HUMAN Metastasis-associated protein MTA1 OS=Homo sapiens OX=9606 GN=MTA1 PE=1 SV=2			2.81		||NA|	2.81	NA	#VALUE!
P17028	301	ZNF24	ZNF24_HUMAN Zinc finger protein 24 OS=Homo sapiens OX=9606 GN=ZNF24 PE=1 SV=4				2.81	|||NA	2.81	NA	#VALUE!
Q08AN1	599	ZNF616	ZN616_HUMAN Zinc finger protein 616 OS=Homo sapiens OX=9606 GN=ZNF616 PE=2 SV=2				2.81	|||NA	2.81	NA	#VALUE!
Q06830	10	PRDX1	PRDX1_HUMAN Peroxiredoxin-1 OS=Homo sapiens OX=9606 GN=PRDX1 PE=1 SV=1	2.49	3.515	2.565	2.66	1.2845|0.28123|0.76007|0.40658	2.8075	0.47677	16.982
P62807	50	H2BC4	H2B1C_HUMAN Histone H2B type 1-C/E/F/G/I OS=Homo sapiens OX=9606 GN=H2BC4 PE=1 SV=4		3.585		2.03	|1.09728||0.32138	2.8075	1.09955	39.1647
Q16778	50	H2BC21	H2B2E_HUMAN Histone H2B type 2-E OS=Homo sapiens OX=9606 GN=H2BC21 PE=1 SV=3		3.585		2.03	|1.09728||0.32138	2.8075	1.09955	39.1647
P13639	27	EEF2	EF2_HUMAN Elongation factor 2 OS=Homo sapiens OX=9606 GN=EEF2 PE=1 SV=4	4.33	2.74	2.125	2.02	NA|0.69407|0.255|0.39102	2.80375	1.06591	38.0173
P26599	411	PTBP1	PTBP1_HUMAN Polypyrimidine tract-binding protein 1 OS=Homo sapiens OX=9606 GN=PTBP1 PE=1 SV=1	3.675	2.835	2.23	2.47	0.20506|1.23744|0.44132|0.06351	2.8025	0.63262	22.5734
P07205	170	PGK2	PGK2_HUMAN Phosphoglycerate kinase 2 OS=Homo sapiens OX=9606 GN=PGK2 PE=1 SV=3	2.8				0.39869|||	2.8	NA	#VALUE!
P33993	270	MCM7	MCM7_HUMAN DNA replication licensing factor MCM7 OS=Homo sapiens OX=9606 GN=MCM7 PE=1 SV=4			3	2.595	||0.94975|0.16263	2.7975	0.28638	10.237
P30041	79	PRDX6	PRDX6_HUMAN Peroxiredoxin-6 OS=Homo sapiens OX=9606 GN=PRDX6 PE=1 SV=3	2.62	2.58	3.265	2.72	NA|0.70607|2.3119|0.5876	2.79625	0.318	11.3724
P0DMV9	89	HSPA1B	HS71B_HUMAN Heat shock 70 kDa protein 1B OS=Homo sapiens OX=9606 GN=HSPA1B PE=1 SV=1	3.35	3.59	1.955	2.28	0.67151|1.27315|0.39466|0.64826	2.79375	0.7981	28.5673
Q02543	37	RPL18A	RL18A_HUMAN 60S ribosomal protein L18a OS=Homo sapiens OX=9606 GN=RPL18A PE=1 SV=2	3.855		2.155	2.36	1.40714||0.39908|0.0	2.79	0.928	33.2616
P52272	644	HNRNPM	HNRPM_HUMAN Heterogeneous nuclear ribonucleoprotein M OS=Homo sapiens OX=9606 GN=HNRNPM PE=1 SV=3	3.15	2.83	2.42	2.76	0.484|0.30904|0.46852|0.25314	2.79	0.29944	10.7326
Q9UQ35	841	SRRM2	SRRM2_HUMAN Serine/arginine repetitive matrix protein 2 OS=Homo sapiens OX=9606 GN=SRRM2 PE=1 SV=2		2.79			|NA||	2.79	NA	#VALUE!
Q7L2E3	976	DHX30	DHX30_HUMAN ATP-dependent RNA helicase DHX30 OS=Homo sapiens OX=9606 GN=DHX30 PE=1 SV=1		3.27	2.29		|NA|NA|	2.78	0.69296	24.9266
P08670	437	VIM	VIME_HUMAN Vimentin OS=Homo sapiens OX=9606 GN=VIM PE=1 SV=4	3.67	4.2	1.92	1.32	0.72597|1.34622|0.5422|1.01823	2.7775	1.37595	49.5392
P08238	632	HSP90AB1	HS90B_HUMAN Heat shock protein HSP 90-beta OS=Homo sapiens OX=9606 GN=HSP90AB1 PE=1 SV=4	3.86	3.53	1.85	1.865	0.60619|1.01442|0.4299|0.27117	2.77625	1.06942	38.5203
O75533	281	SF3B1	SF3B1_HUMAN Splicing factor 3B subunit 1 OS=Homo sapiens OX=9606 GN=SF3B1 PE=1 SV=3	2.985	3.18	2.36	2.57	0.47376|0.33791|0.84853|0.77947	2.77375	0.37522	13.5275
Q15393	998	SF3B3	SF3B3_HUMAN Splicing factor 3B subunit 3 OS=Homo sapiens OX=9606 GN=SF3B3 PE=1 SV=4	2.93	2.95	2.44		NA|NA|NA|	2.77333	0.28885	10.4153
Q93077	124	H2AC6	H2A1C_HUMAN Histone H2A type 1-C OS=Homo sapiens OX=9606 GN=H2AC6 PE=1 SV=3	1.76		4.02	2.53	0.01414||0.76052|0.92494	2.77	1.14896	41.4787
Q9NSD9	565	FARSB	SYFB_HUMAN Phenylalanine--tRNA ligase beta subunit OS=Homo sapiens OX=9606 GN=FARSB PE=1 SV=3	3.77	3.37	2.135	1.8	NA|NA|0.03536|0.19053	2.76875	0.94941	34.2902
P46379	354	BAG6	BAG6_HUMAN Large proline-rich protein BAG6 OS=Homo sapiens OX=9606 GN=BAG6 PE=1 SV=2	2.72	2.8	2.235	3.315	0.19858|NA|0.09192|0.82731	2.7675	0.4422	15.9783
Q8N1G4	78	LRRC47	LRC47_HUMAN Leucine-rich repeat-containing protein 47 OS=Homo sapiens OX=9606 GN=LRRC47 PE=1 SV=1	3.06	2.68		2.56	0.3677|0.0||0.38105	2.76667	0.26102	9.43445
Q9NPI6	216	DCP1A	DCP1A_HUMAN mRNA-decapping enzyme 1A OS=Homo sapiens OX=9606 GN=DCP1A PE=1 SV=3			2.76		||NA|	2.76	NA	#VALUE!
P52306	539	RAP1GDS1	GDS1_HUMAN Rap1 GTPase-GDP dissociation stimulator 1 OS=Homo sapiens OX=9606 GN=RAP1GDS1 PE=1 SV=3	2.63	2.88			NA|NA||	2.755	0.17678	6.4167
O15144	245	ARPC2	ARPC2_HUMAN Actin-related protein 2/3 complex subunit 2 OS=Homo sapiens OX=9606 GN=ARPC2 PE=1 SV=1		5.36	1.62	1.28	|NA|NA|NA	2.75333	2.26383	82.2215
Q9BWD1	368	ACAT2	THIC_HUMAN Acetyl-CoA acetyltransferase, cytosolic OS=Homo sapiens OX=9606 GN=ACAT2 PE=1 SV=2	3.695	2.4	3.58	1.33	1.92141|0.09238|0.51962|NA	2.75125	1.11368	40.4791
P54577	143	YARS1	SYYC_HUMAN Tyrosine--tRNA ligase, cytoplasmic OS=Homo sapiens OX=9606 GN=YARS1 PE=1 SV=4	3.52	3.06	2.14	2.27	0.0|1.17547|0.25212|0.7487	2.7475	0.65612	23.8806
P40227	214	CCT6A	TCPZ_HUMAN T-complex protein 1 subunit zeta OS=Homo sapiens OX=9606 GN=CCT6A PE=1 SV=3	3.02	3.4	2.2	2.37	1.15648|0.9762|0.83036|0.25733	2.7475	0.56044	20.3982
P34897	380	SHMT2	GLYM_HUMAN Serine hydroxymethyltransferase, mitochondrial OS=Homo sapiens OX=9606 GN=SHMT2 PE=1 SV=3	3.345	3.13	2.495	2.02	0.34648|NA|0.30406|1.01823	2.7475	0.60452	22.0025
Q9Y2V2	130	CARHSP1	CHSP1_HUMAN Calcium-regulated heat-stable protein 1 OS=Homo sapiens OX=9606 GN=CARHSP1 PE=1 SV=2	2.51	2.985			NA|0.67175||	2.7475	0.33588	12.2249
P08670	461	VIM	VIME_HUMAN Vimentin OS=Homo sapiens OX=9606 GN=VIM PE=1 SV=4	3.62	3.39	1.23		NA|NA|NA|	2.74667	1.3185	48.0036
P54886	511	ALDH18A1	P5CS_HUMAN Delta-1-pyrroline-5-carboxylate synthase OS=Homo sapiens OX=9606 GN=ALDH18A1 PE=1 SV=2	2.745				0.07778|||	2.745	NA	#VALUE!
P49327	1062	FASN	FAS_HUMAN Fatty acid synthase OS=Homo sapiens OX=9606 GN=FASN PE=1 SV=3	3.23	4.27	2.12	1.36	0.82024|NA|0.01414|0.38184	2.745	1.27406	46.4138
Q9UNE7	266	STUB1	CHIP_HUMAN E3 ubiquitin-protein ligase CHIP OS=Homo sapiens OX=9606 GN=STUB1 PE=1 SV=2	3.46	3.29	1.85	2.37	0.79681|NA|1.16423|NA	2.7425	0.76374	27.8483
P49792	839	RANBP2	RBP2_HUMAN E3 SUMO-protein ligase RanBP2 OS=Homo sapiens OX=9606 GN=RANBP2 PE=1 SV=2		3.29		2.195	|NA||0.3182	2.7425	0.77428	28.2326
Q99613	326	EIF3C	EIF3C_HUMAN Eukaryotic translation initiation factor 3 subunit C OS=Homo sapiens OX=9606 GN=EIF3C PE=1 SV=1	2.745	2.84	3.4	1.98	0.99158|0.89437|1.18794|0.10372	2.74125	0.58401	21.3045
O43324	174	EEF1E1	MCA3_HUMAN Eukaryotic translation elongation factor 1 epsilon-1 OS=Homo sapiens OX=9606 GN=EEF1E1 PE=1 SV=1	2.74				NA|||	2.74	NA	#VALUE!
P55769	17	SNU13	NH2L1_HUMAN NHP2-like protein 1 OS=Homo sapiens OX=9606 GN=SNU13 PE=1 SV=3	2.55	4.01	2.48	1.92	2.12218|2.55973|0.0|NA	2.74	0.89238	32.5686
Q02878	227	RPL6	RL6_HUMAN 60S ribosomal protein L6 OS=Homo sapiens OX=9606 GN=RPL6 PE=1 SV=3	4.13			1.35	NA|||NA	2.74	1.96576	71.7431
Q9BXP5	656	SRRT	SRRT_HUMAN Serrate RNA effector molecule homolog OS=Homo sapiens OX=9606 GN=SRRT PE=1 SV=1	3.44	2.87		1.91	NA|0.5374||0.0	2.74	0.77324	28.2204
P63261	161	ACTG1	ACTG_HUMAN Actin, cytoplasmic 2 OS=Homo sapiens OX=9606 GN=ACTG1 PE=1 SV=1	2.74				NA|||	2.74	NA	#VALUE!
P61026	72	RAB10	RAB10_HUMAN Ras-related protein Rab-10 OS=Homo sapiens OX=9606 GN=RAB10 PE=1 SV=1	3.07	2.88	2.26		NA|0.38105|NA|	2.73667	0.4236	15.4787
Q08211	834	DHX9	DHX9_HUMAN ATP-dependent RNA helicase A OS=Homo sapiens OX=9606 GN=DHX9 PE=1 SV=4	3.65	4.235	1.36	1.675	0.44433|0.27577|0.53026|0.30263	2.73	1.42611	52.2385
P04844	264	RPN2	RPN2_HUMAN Dolichyl-diphosphooligosaccharide--protein glycosyltransferase subunit 2 OS=Homo sapiens OX=9606 GN=RPN2 PE=1 SV=3				2.73	|||0.0	2.73	NA	#VALUE!
P38606	225	ATP6V1A	VATA_HUMAN V-type proton ATPase catalytic subunit A OS=Homo sapiens OX=9606 GN=ATP6V1A PE=1 SV=2	2.92	2.815	2.67	2.5	0.42028|0.03536|0.46656|0.33553	2.72625	0.18236	6.68904
P06733	190	ENO1	ENOA_HUMAN Alpha-enolase OS=Homo sapiens OX=9606 GN=ENO1 PE=1 SV=2	3.75	2.495	2.445	2.2	0.23557|1.75595|0.31054|0.35052	2.7225	0.69702	25.6022
Q07020	162	RPL18	RL18_HUMAN 60S ribosomal protein L18 OS=Homo sapiens OX=9606 GN=RPL18 PE=1 SV=2	1.97	3.25	3.26	2.4	0.79196|0.70437|NA|0.02887	2.72	0.64224	23.6118
Q9NRW7	553	VPS45	VPS45_HUMAN Vacuolar protein sorting-associated protein 45 OS=Homo sapiens OX=9606 GN=VPS45 PE=1 SV=1				2.72	|||NA	2.72	NA	#VALUE!
P08238	320	HSP90AB1	HS90B_HUMAN Heat shock protein HSP 90-beta OS=Homo sapiens OX=9606 GN=HSP90AB1 PE=1 SV=4	2.8	3.42	2.325	2.33	NA|1.466|0.93453|0.67085	2.71875	0.51785	19.0474
P07900	328	HSP90AA1	HS90A_HUMAN Heat shock protein HSP 90-alpha OS=Homo sapiens OX=9606 GN=HSP90AA1 PE=1 SV=5	2.8	3.42	2.325	2.33	NA|1.466|0.93453|0.67085	2.71875	0.51785	19.0474
Q9Y383	127	LUC7L2	LC7L2_HUMAN Putative RNA-binding protein Luc7-like 2 OS=Homo sapiens OX=9606 GN=LUC7L2 PE=1 SV=2		4.69	1.245	2.22	|NA|0.7458|NA	2.71833	1.77574	65.3247
Q9NQ29	127	LUC7L	LUC7L_HUMAN Putative RNA-binding protein Luc7-like 1 OS=Homo sapiens OX=9606 GN=LUC7L PE=1 SV=1		4.69	1.245	2.22	|NA|0.7458|NA	2.71833	1.77574	65.3247
Q96AG4	89	LRRC59	LRC59_HUMAN Leucine-rich repeat-containing protein 59 OS=Homo sapiens OX=9606 GN=LRRC59 PE=1 SV=1	3.55	3.335	2.195	1.785	0.0|1.09772|0.35294|0.46594	2.71625	0.85964	31.648
P22626	180	HNRNPA2B1	ROA2_HUMAN Heterogeneous nuclear ribonucleoproteins A2/B1 OS=Homo sapiens OX=9606 GN=HNRNPA2B1 PE=1 SV=2	4.11	3.07	1.57	2.11	0.78083|0.73539|0.44065|0.29023	2.715	1.1179	41.175
P78371	200	CCT2	TCPB_HUMAN T-complex protein 1 subunit beta OS=Homo sapiens OX=9606 GN=CCT2 PE=1 SV=4	3.135	2.655		2.355	1.56271|1.40714||0.16263	2.715	0.39345	14.4917
O60506	277	SYNCRIP	HNRPQ_HUMAN Heterogeneous nuclear ribonucleoprotein Q OS=Homo sapiens OX=9606 GN=SYNCRIP PE=1 SV=2	4.39		1.8	1.95	NA||0.21213|NA	2.71333	1.45397	53.5862
P49327	68	FASN	FAS_HUMAN Fatty acid synthase OS=Homo sapiens OX=9606 GN=FASN PE=1 SV=3	2.845	3.36	2.185	2.45	0.66043|0.71937|0.60168|0.3786	2.71	0.51119	18.8631
P49368	74	CCT3	TCPG_HUMAN T-complex protein 1 subunit gamma OS=Homo sapiens OX=9606 GN=CCT3 PE=1 SV=4	2.93	4.18	2.21	1.515	1.61004|1.10309|0.16462|0.53033	2.70875	1.13832	42.0238
P29692	77	EEF1D	EF1D_HUMAN Elongation factor 1-delta OS=Homo sapiens OX=9606 GN=EEF1D PE=1 SV=5	3.84	3.74	1.535	1.72	0.7621|0.81576|0.26949|0.56345	2.70875	1.25147	46.201
P61970	124	NUTF2	NTF2_HUMAN Nuclear transport factor 2 OS=Homo sapiens OX=9606 GN=NUTF2 PE=1 SV=1	2.92	3.44	2.295	2.18	0.04243|0.07371|0.34648|0.10392	2.70875	0.58598	21.6329
P49327	1263	FASN	FAS_HUMAN Fatty acid synthase OS=Homo sapiens OX=9606 GN=FASN PE=1 SV=3	3.11	2.92	1.805	2.99	1.0282|NA|0.68589|NA	2.70625	0.60593	22.39
Q9BQ39	474	DDX50	DDX50_HUMAN ATP-dependent RNA helicase DDX50 OS=Homo sapiens OX=9606 GN=DDX50 PE=1 SV=1	3.49	3.7	1.435	2.155	1.08542|0.76173|0.90164|0.33091	2.695	1.0834	40.2004
Q9NR30	523	DDX21	DDX21_HUMAN Nucleolar RNA helicase 2 OS=Homo sapiens OX=9606 GN=DDX21 PE=1 SV=5	3.49	3.7	1.435	2.155	1.08542|0.76173|0.90164|0.33091	2.695	1.0834	40.2004
P48643	505	CCT5	TCPE_HUMAN T-complex protein 1 subunit epsilon OS=Homo sapiens OX=9606 GN=CCT5 PE=1 SV=1	2.82	3.38	2.13	2.45	0.19726|1.21606|0.37144|0.4078	2.695	0.53669	19.9143
P46781	156	RPS9	RS9_HUMAN 40S ribosomal protein S9 OS=Homo sapiens OX=9606 GN=RPS9 PE=1 SV=3	3.57	3.54	2.07	1.6	NA|NA|0.74664|0.48215	2.695	1.01148	37.5317
P12956	232	XRCC6	XRCC6_HUMAN X-ray repair cross-complementing protein 6 OS=Homo sapiens OX=9606 GN=XRCC6 PE=1 SV=2	3.19	3.83	1.86	1.885	0.62803|1.05058|0.23726|0.54543	2.69125	0.9809	36.4477
P43243	282	MATR3	MATR3_HUMAN Matrin-3 OS=Homo sapiens OX=9606 GN=MATR3 PE=1 SV=2	3.34	3.35	1.925	2.15	0.83029|0.73261|0.35065|0.44634	2.69125	0.76046	28.2568
P05023	52	ATP1A1	AT1A1_HUMAN Sodium/potassium-transporting ATPase subunit alpha-1 OS=Homo sapiens OX=9606 GN=ATP1A1 PE=1 SV=1	2.25		1.68	4.14	NA||NA|0.0	2.69	1.28767	47.8688
O95639	262	CPSF4	CPSF4_HUMAN Cleavage and polyadenylation specificity factor subunit 4 OS=Homo sapiens OX=9606 GN=CPSF4 PE=1 SV=1		2.69			|NA||	2.69	NA	#VALUE!
P11172	362	UMPS	UMPS_HUMAN Uridine 5'-monophosphate synthase OS=Homo sapiens OX=9606 GN=UMPS PE=1 SV=1	3.14		3.01	1.91	NA||NA|NA	2.68667	0.67575	25.152
P22102	117	GART	PUR2_HUMAN Trifunctional purine biosynthetic protein adenosine-3 OS=Homo sapiens OX=9606 GN=GART PE=1 SV=1	3.2	3.14	1.87	2.535	0.49822|0.17397|0.84159|0.62933	2.68625	0.62155	23.1382
Q9BYX7	371	POTEKP	ACTBM_HUMAN Putative beta-actin-like protein 3 OS=Homo sapiens OX=9606 GN=POTEKP PE=5 SV=1	3.4			1.97	1.16412|||0.33317	2.685	1.01116	37.6596
P53396	371	ACLY	ACLY_HUMAN ATP-citrate synthase OS=Homo sapiens OX=9606 GN=ACLY PE=1 SV=3	3.05	2.48	2.8	2.405	0.73082|NA|NA|0.49564	2.68375	0.29826	11.1136
P61313	181	RPL15	RL15_HUMAN 60S ribosomal protein L15 OS=Homo sapiens OX=9606 GN=RPL15 PE=1 SV=2	2.495	2.09	3.5	2.645	0.16263|0.11314|0.78389|0.52249	2.6825	0.59327	22.1163
Q9Y265	156	RUVBL1	RUVB1_HUMAN RuvB-like 1 OS=Homo sapiens OX=9606 GN=RUVBL1 PE=1 SV=1	2.68				0.0|||	2.68	NA	#VALUE!
Q8WW12	153	PCNP	PCNP_HUMAN PEST proteolytic signal-containing nuclear protein OS=Homo sapiens OX=9606 GN=PCNP PE=1 SV=2				2.68	|||NA	2.68	NA	#VALUE!
P35579	1194	MYH9	MYH9_HUMAN Myosin-9 OS=Homo sapiens OX=9606 GN=MYH9 PE=1 SV=4	3.76	3.38	1.66	1.91	1.55732|0.09452|NA|0.3969	2.6775	1.04717	39.11
Q12905	323	ILF2	ILF2_HUMAN Interleukin enhancer-binding factor 2 OS=Homo sapiens OX=9606 GN=ILF2 PE=1 SV=2	3.45	2.01	2.57		NA|NA|NA|	2.67667	0.7259	27.1195
Q5VTE0	95	EEF1A1P5	EF1A3_HUMAN Putative elongation factor 1-alpha-like 3 OS=Homo sapiens OX=9606 GN=EEF1A1P5 PE=5 SV=1	2.72	2.84	2.56	2.575	0.57453|0.69525|0.54556|0.52098	2.67375	0.13225	4.94624
P60866	18	RPS20	RS20_HUMAN 40S ribosomal protein S20 OS=Homo sapiens OX=9606 GN=RPS20 PE=1 SV=1	3.835	3.39	1.765	1.7	0.68929|1.30578|0.43126|0.46982	2.6725	1.10084	41.1914
O43719	405	HTATSF1	HTSF1_HUMAN HIV Tat-specific factor 1 OS=Homo sapiens OX=9606 GN=HTATSF1 PE=1 SV=1				2.67	|||NA	2.67	NA	#VALUE!
P62829	77	RPL23	RL23_HUMAN 60S ribosomal protein L23 OS=Homo sapiens OX=9606 GN=RPL23 PE=1 SV=1	2.97	2.93	2.44	2.335	1.03407|0.51792|0.43892|0.80409	2.66875	0.32798	12.2896
P26639	441	TARS1	SYTC_HUMAN Threonine--tRNA ligase 1, cytoplasmic OS=Homo sapiens OX=9606 GN=TARS1 PE=1 SV=3	3.02	3.25	2.01	2.395	1.11891|1.42203|0.79995|0.66251	2.66875	0.56866	21.3081
P62266	31	RPS23	RS23_HUMAN 40S ribosomal protein S23 OS=Homo sapiens OX=9606 GN=RPS23 PE=1 SV=3	2.98	2.97	2.4	2.32	1.1935|0.60144|0.48422|NA	2.6675	0.35659	13.3679
P12277	305	CKB	KCRB_HUMAN Creatine kinase B-type OS=Homo sapiens OX=9606 GN=CKB PE=1 SV=1	2.23	2.645	3.12		NA|0.3182|NA|	2.665	0.44534	16.7107
Q08211	687	DHX9	DHX9_HUMAN ATP-dependent RNA helicase A OS=Homo sapiens OX=9606 GN=DHX9 PE=1 SV=4	2.9	2.64	2.48	2.64	0.76028|0.78377|0.33021|0.44305	2.665	0.17388	6.52458
P13073	54	COX4I1	COX41_HUMAN Cytochrome c oxidase subunit 4 isoform 1, mitochondrial OS=Homo sapiens OX=9606 GN=COX4I1 PE=1 SV=1		3.85	2.88	1.26	|NA|NA|NA	2.66333	1.30852	49.131
Q5JRX3	220	PITRM1	PREP_HUMAN Presequence protease, mitochondrial OS=Homo sapiens OX=9606 GN=PITRM1 PE=1 SV=3	1.58		3.13	3.275	NA||0.71863|2.21324	2.66167	0.93955	35.2993
Q9UBB4	341	ATXN10	ATX10_HUMAN Ataxin-10 OS=Homo sapiens OX=9606 GN=ATXN10 PE=1 SV=1	2.815	2.83	2.4	2.6	0.2192|0.0|0.45255|0.35355	2.66125	0.2034	7.64302
P49327	1056	FASN	FAS_HUMAN Fatty acid synthase OS=Homo sapiens OX=9606 GN=FASN PE=1 SV=3	3.145	3.48	2.18	1.84	0.56468|0.94839|0.18682|0.23	2.66125	0.77684	29.1908
Q99873	82	PRMT1	ANM1_HUMAN Protein arginine N-methyltransferase 1 OS=Homo sapiens OX=9606 GN=PRMT1 PE=1 SV=3			2.66		||NA|	2.66	NA	#VALUE!
Q9H0S4	144	DDX47	DDX47_HUMAN Probable ATP-dependent RNA helicase DDX47 OS=Homo sapiens OX=9606 GN=DDX47 PE=1 SV=1				2.66	|||NA	2.66	NA	#VALUE!
Q9UN86	31	G3BP2	G3BP2_HUMAN Ras GTPase-activating protein-binding protein 2 OS=Homo sapiens OX=9606 GN=G3BP2 PE=1 SV=2	0.84	4.09	3.025	2.675	0.08485|NA|1.53442|0.14849	2.6575	1.35286	50.9072
O60716	750	CTNND1	CTND1_HUMAN Catenin delta-1 OS=Homo sapiens OX=9606 GN=CTNND1 PE=1 SV=1		2.85		2.46	|0.0||NA	2.655	0.27577	10.3868
Q08752	146	PPID	PPID_HUMAN Peptidyl-prolyl cis-trans isomerase D OS=Homo sapiens OX=9606 GN=PPID PE=1 SV=3		2.57	2.74		|NA|NA|	2.655	0.12021	4.52768
P15531	51	NME1	NDKA_HUMAN Nucleoside diphosphate kinase A OS=Homo sapiens OX=9606 GN=NME1 PE=1 SV=1	3.14	3.5	1.56	2.41	0.16971|0.32527|0.68942|0.42462	2.6525	0.85796	32.3453
O60814	110	H2BC12	H2B1K_HUMAN Histone H2B type 1-K OS=Homo sapiens OX=9606 GN=H2BC12 PE=1 SV=3	3.48		2.24	2.23	0.69956||0.30811|0.14469	2.65	0.71882	27.1253
P06899	110	H2BC11	H2B1J_HUMAN Histone H2B type 1-J OS=Homo sapiens OX=9606 GN=H2BC11 PE=1 SV=3	3.48		2.24	2.23	0.69956||0.30811|0.14469	2.65	0.71882	27.1253
Q71U36	88	TUBA1A	TBA1A_HUMAN Tubulin alpha-1A chain OS=Homo sapiens OX=9606 GN=TUBA1A PE=1 SV=1	3.34	3.37	1.93	1.96	0.27414|0.62405|0.38109|0.33367	2.65	0.81425	30.7264
Q29RF7	622	PDS5A	PDS5A_HUMAN Sister chromatid cohesion protein PDS5 homolog A OS=Homo sapiens OX=9606 GN=PDS5A PE=1 SV=1	4.75	1.04	2.15		NA|NA|0.0|	2.64667	1.90421	71.9474
Q9H4M9	192	EHD1	EHD1_HUMAN EH domain-containing protein 1 OS=Homo sapiens OX=9606 GN=EHD1 PE=1 SV=2		2.7		2.59	|NA||NA	2.645	0.07778	2.94064
Q9H223	195	EHD4	EHD4_HUMAN EH domain-containing protein 4 OS=Homo sapiens OX=9606 GN=EHD4 PE=1 SV=1		2.7		2.59	|NA||NA	2.645	0.07778	2.94064
Q99426	86	TBCB	TBCB_HUMAN Tubulin-folding cofactor B OS=Homo sapiens OX=9606 GN=TBCB PE=1 SV=2	2.855	4.31	1.58	1.83	0.60104|NA|NA|0.30806	2.64375	1.24026	46.9129
P0CG39	1034	POTEJ	POTEJ_HUMAN POTE ankyrin domain family member J OS=Homo sapiens OX=9606 GN=POTEJ PE=3 SV=1	3.4	3.32	1.88	1.97	1.16412|0.68077|0.31377|0.33317	2.6425	0.82995	31.4078
P63261	371	ACTG1	ACTG_HUMAN Actin, cytoplasmic 2 OS=Homo sapiens OX=9606 GN=ACTG1 PE=1 SV=1	3.4	3.32	1.88	1.97	1.16412|0.68077|0.31377|0.33317	2.6425	0.82995	31.4078
P14618	252	PKM	KPYM_HUMAN Pyruvate kinase PKM OS=Homo sapiens OX=9606 GN=PKM PE=1 SV=4	3.525	3.13	2.115	1.79	0.94412|0.76407|0.39188|0.24947	2.64	0.82086	31.0932
P22087	306	FBL	FBRL_HUMAN rRNA 2'-O-methyltransferase fibrillarin OS=Homo sapiens OX=9606 GN=FBL PE=1 SV=2	2.49	1.52		3.91	NA|NA||NA	2.64	1.20204	45.5318
P47897	640	QARS1	SYQ_HUMAN Glutamine--tRNA ligase OS=Homo sapiens OX=9606 GN=QARS1 PE=1 SV=1	2.5			2.78	NA|||NA	2.64	0.19799	7.49962
Q9NP79	20	VTA1	VTA1_HUMAN Vacuolar protein sorting-associated protein VTA1 homolog OS=Homo sapiens OX=9606 GN=VTA1 PE=1 SV=1		2.64			|NA||	2.64	NA	#VALUE!
P48147	207	PREP	PPCE_HUMAN Prolyl endopeptidase OS=Homo sapiens OX=9606 GN=PREP PE=1 SV=2				2.64	|||NA	2.64	NA	#VALUE!
Q8IUF8	120	RIOX2	RIOX2_HUMAN Ribosomal oxygenase 2 OS=Homo sapiens OX=9606 GN=RIOX2 PE=1 SV=1				2.64	|||0.0	2.64	NA	#VALUE!
O00571	209	DDX3X	DDX3X_HUMAN ATP-dependent RNA helicase DDX3X OS=Homo sapiens OX=9606 GN=DDX3X PE=1 SV=3	3.17	2.81	2.65	1.925	1.12973|0.31144|0.28477|0.48217	2.63875	0.52317	19.8264
Q92804	159	TAF15	RBP56_HUMAN TATA-binding protein-associated factor 2N OS=Homo sapiens OX=9606 GN=TAF15 PE=1 SV=1		2.06	3.63	2.22	|NA|NA|NA	2.63667	0.86396	32.7671
Q8N1G4	313	LRRC47	LRC47_HUMAN Leucine-rich repeat-containing protein 47 OS=Homo sapiens OX=9606 GN=LRRC47 PE=1 SV=1	3.1		2.84	1.965	0.0||NA|0.14849	2.635	0.59462	22.5662
P46776	49	RPL27A	RL27A_HUMAN 60S ribosomal protein L27a OS=Homo sapiens OX=9606 GN=RPL27A PE=1 SV=2	2.69	2.77	2.63	2.445	0.5435|0.24131|0.38113|0.20704	2.63375	0.13829	5.25069
Q9Y2L1	231	DIS3	RRP44_HUMAN Exosome complex exonuclease RRP44 OS=Homo sapiens OX=9606 GN=DIS3 PE=1 SV=2		2.18	3.11	2.61	|NA|NA|NA	2.63333	0.46544	17.675
Q9NR20	99	DYRK4	DYRK4_HUMAN Dual specificity tyrosine-phosphorylation-regulated kinase 4 OS=Homo sapiens OX=9606 GN=DYRK4 PE=1 SV=2	3.35	3.03	1.58	2.57	0.0|1.57906|NA|0.82024	2.6325	0.77125	29.2972
P22626	163	HNRNPA2B1	ROA2_HUMAN Heterogeneous nuclear ribonucleoproteins A2/B1 OS=Homo sapiens OX=9606 GN=HNRNPA2B1 PE=1 SV=2	3.38	2.66	2.275	2.21	4.27709|2.57387|0.23671|0.42618	2.63125	0.53722	20.4169
P22626	84	HNRNPA2B1	ROA2_HUMAN Heterogeneous nuclear ribonucleoproteins A2/B1 OS=Homo sapiens OX=9606 GN=HNRNPA2B1 PE=1 SV=2			2.84	2.42	||NA|NA	2.63	0.29698	11.292
P15531	118	NME1	NDKA_HUMAN Nucleoside diphosphate kinase A OS=Homo sapiens OX=9606 GN=NME1 PE=1 SV=1	3.545	4.06	1.5	1.4	1.03581|0.41758|0.17319|0.28481	2.62625	1.375	52.356
P46776	17	RPL27A	RL27A_HUMAN 60S ribosomal protein L27a OS=Homo sapiens OX=9606 GN=RPL27A PE=1 SV=2	2.87	2.845	2.025	2.76	NA|0.60104|1.59099|NA	2.625	0.40276	15.3432
P62701	142	RPS4X	RS4X_HUMAN 40S ribosomal protein S4, X isoform OS=Homo sapiens OX=9606 GN=RPS4X PE=1 SV=2	3.23	3.34	2	1.93	0.33167|0.37034|0.64779|0.55474	2.625	0.76396	29.1032
O14602	112	EIF1AY	IF1AY_HUMAN Eukaryotic translation initiation factor 1A, Y-chromosomal OS=Homo sapiens OX=9606 GN=EIF1AY PE=1 SV=4	2.665	3.44	2.68	1.71	0.54447|0.0|0.68705|1.04652	2.62375	0.70854	27.0049
P50213	317	IDH3A	IDH3A_HUMAN Isocitrate dehydrogenase [NAD] subunit alpha, mitochondrial OS=Homo sapiens OX=9606 GN=IDH3A PE=1 SV=1	2.47	3.87		1.53	NA|NA||NA	2.62333	1.17751	44.8861
O43719	401	HTATSF1	HTSF1_HUMAN HIV Tat-specific factor 1 OS=Homo sapiens OX=9606 GN=HTATSF1 PE=1 SV=1	3.44			1.8	NA|||NA	2.62	1.15966	44.2618
Q6L8Q7	379	PDE12	PDE12_HUMAN 2',5'-phosphodiesterase 12 OS=Homo sapiens OX=9606 GN=PDE12 PE=1 SV=2	2.62				NA|||	2.62	NA	#VALUE!
P0DME0	57	SETSIP	SETLP_HUMAN Protein SETSIP OS=Homo sapiens OX=9606 GN=SETSIP PE=1 SV=1	5.71		0.75	1.4	2.19682||NA|0.36964	2.62	2.69568	102.889
Q13564	360	NAE1	ULA1_HUMAN NEDD8-activating enzyme E1 regulatory subunit OS=Homo sapiens OX=9606 GN=NAE1 PE=1 SV=1		4.03	1.99	1.84	|NA|0.53116|0.25981	2.62	1.2234	46.6947
P13010	152	XRCC5	XRCC5_HUMAN X-ray repair cross-complementing protein 5 OS=Homo sapiens OX=9606 GN=XRCC5 PE=1 SV=3	3.31	2.03	2.67	2.465	0.90964|0.76368|0.56022|0.51232	2.61875	0.53252	20.3349
P62269	42	RPS18	RS18_HUMAN 40S ribosomal protein S18 OS=Homo sapiens OX=9606 GN=RPS18 PE=1 SV=3	3.12	2.72	3.15	1.46	NA|NA|0.22517|1.59211	2.6125	0.79294	30.3518
P04406	111	GAPDH	G3P_HUMAN Glyceraldehyde-3-phosphate dehydrogenase OS=Homo sapiens OX=9606 GN=GAPDH PE=1 SV=3	2.62	3.39	2.53	1.9	NA|1.38568|0.09238|NA	2.61	0.61074	23.4
O94906	465	PRPF6	PRP6_HUMAN Pre-mRNA-processing factor 6 OS=Homo sapiens OX=9606 GN=PRPF6 PE=1 SV=1				2.61	|||NA	2.61	NA	#VALUE!
P07900	640	HSP90AA1	HS90A_HUMAN Heat shock protein HSP 90-alpha OS=Homo sapiens OX=9606 GN=HSP90AA1 PE=1 SV=5	3.06	3.95	1.515	1.9	1.24673|1.11735|0.50291|0.39946	2.60625	1.11073	42.6179
Q5VTE0	26	EEF1A1P5	EF1A3_HUMAN Putative elongation factor 1-alpha-like 3 OS=Homo sapiens OX=9606 GN=EEF1A1P5 PE=5 SV=1	3.03	2.98	2.23	2.17	0.71103|0.47372|0.31106|0.37797	2.6025	0.46586	17.9005
Q05639	26	EEF1A2	EF1A2_HUMAN Elongation factor 1-alpha 2 OS=Homo sapiens OX=9606 GN=EEF1A2 PE=1 SV=1	3.03	2.98	2.23	2.17	0.71103|0.47372|0.31106|0.37797	2.6025	0.46586	17.9005
P13073	51	COX4I1	COX41_HUMAN Cytochrome c oxidase subunit 4 isoform 1, mitochondrial OS=Homo sapiens OX=9606 GN=COX4I1 PE=1 SV=1	2.445	4.16	1.63	2.17	1.05291|1.24917|0.14154|1.35595	2.60125	1.09292	42.0152
P06748	40	NPM1	NPM_HUMAN Nucleophosmin OS=Homo sapiens OX=9606 GN=NPM1 PE=1 SV=2	2.97	3.47	1.86	2.1	1.75012|0.63322|0.12258|0.11446	2.6	0.75087	28.8796
Q6S8J3	1071	POTEE	POTEE_HUMAN POTE ankyrin domain family member E OS=Homo sapiens OX=9606 GN=POTEE PE=2 SV=3		3.32	1.88		|0.68077|0.31377|	2.6	1.01823	39.1627
P30626	108	SRI	SORCN_HUMAN Sorcin OS=Homo sapiens OX=9606 GN=SRI PE=1 SV=1			3.105	2.095	||1.0253|0.74246	2.6	0.71418	27.4685
P30101	210	PDIA3	PDIA3_HUMAN Protein disulfide-isomerase A3 OS=Homo sapiens OX=9606 GN=PDIA3 PE=1 SV=4				2.6	|||NA	2.6	NA	#VALUE!
Q71UI9	115	H2AZ2	H2AV_HUMAN Histone H2A.V OS=Homo sapiens OX=9606 GN=H2AZ2 PE=1 SV=3	2.87	2.82	2.415	2.28	0.74539|1.10771|0.2359|0.4183	2.59625	0.29318	11.2924
P25205	553	MCM3	MCM3_HUMAN DNA replication licensing factor MCM3 OS=Homo sapiens OX=9606 GN=MCM3 PE=1 SV=3	3.3		1.89		NA||NA|	2.595	0.99702	38.4208
Q14697	919	GANAB	GANAB_HUMAN Neutral alpha-glucosidase AB OS=Homo sapiens OX=9606 GN=GANAB PE=1 SV=3	3.24	2.82	1.975	2.33	0.25909|0.50764|0.71418|0.46829	2.59125	0.55414	21.385
P31942	7	HNRNPH3	HNRH3_HUMAN Heterogeneous nuclear ribonucleoprotein H3 OS=Homo sapiens OX=9606 GN=HNRNPH3 PE=1 SV=2	3.01			2.17	NA|||NA	2.59	0.59397	22.9332
P60891	12	PRPS1	PRPS1_HUMAN Ribose-phosphate pyrophosphokinase 1 OS=Homo sapiens OX=9606 GN=PRPS1 PE=1 SV=2	3.45			1.73	NA|||NA	2.59	1.21622	46.9583
P46777	195	RPL5	RL5_HUMAN 60S ribosomal protein L5 OS=Homo sapiens OX=9606 GN=RPL5 PE=1 SV=3	3.32	3.21	1.955	1.87	0.95896|0.41268|0.10083|0.4194	2.58875	0.78293	30.2436
P12277	219	CKB	KCRB_HUMAN Creatine kinase B-type OS=Homo sapiens OX=9606 GN=CKB PE=1 SV=1	2.665	3.37	1.9	2.41	1.06773|0.04243|0.24087|NA	2.58625	0.61168	23.6512
P55072	384	VCP	TERA_HUMAN Transitional endoplasmic reticulum ATPase OS=Homo sapiens OX=9606 GN=VCP PE=1 SV=4	3.135	3.05	1.48	2.68	0.86974|0.39598|0.2694|1.00321	2.58625	0.76349	29.5211
Q99832	73	CCT7	TCPH_HUMAN T-complex protein 1 subunit eta OS=Homo sapiens OX=9606 GN=CCT7 PE=1 SV=2	3.49	2.92	1.925	2.005	0.46198|1.25176|0.52967|0.53227	2.585	0.75349	29.1485
Q16658	96	FSCN1	FSCN1_HUMAN Fascin OS=Homo sapiens OX=9606 GN=FSCN1 PE=1 SV=3		2.77		2.4	|NA||NA	2.585	0.26163	10.1211
P22102	664	GART	PUR2_HUMAN Trifunctional purine biosynthetic protein adenosine-3 OS=Homo sapiens OX=9606 GN=GART PE=1 SV=1	2.725	3.2	2.02	2.375	0.49375|0.3676|0.4013|0.99702	2.58	0.50367	19.5221
Q9UNM6	69	PSMD13	PSD13_HUMAN 26S proteasome non-ATPase regulatory subunit 13 OS=Homo sapiens OX=9606 GN=PSMD13 PE=1 SV=2	2.58				0.56569|||	2.58	NA	#VALUE!
Q13685	399	AAMP	AAMP_HUMAN Angio-associated migratory cell protein OS=Homo sapiens OX=9606 GN=AAMP PE=1 SV=2	2.58				NA|||	2.58	NA	#VALUE!
Q14694	685	USP10	UBP10_HUMAN Ubiquitin carboxyl-terminal hydrolase 10 OS=Homo sapiens OX=9606 GN=USP10 PE=1 SV=2	3.28		1.88		NA||NA|	2.58	0.98995	38.3702
O00571	527	DDX3X	DDX3X_HUMAN ATP-dependent RNA helicase DDX3X OS=Homo sapiens OX=9606 GN=DDX3X PE=1 SV=3	2.19	4.27	2.08	1.78	NA|0.0|NA|0.16979	2.58	1.13991	44.1826
P15374	148	UCHL3	UCHL3_HUMAN Ubiquitin carboxyl-terminal hydrolase isozyme L3 OS=Homo sapiens OX=9606 GN=UCHL3 PE=1 SV=1		3.7		1.46	|NA||0.0	2.58	1.58392	61.3922
Q9ULV4	12	CORO1C	COR1C_HUMAN Coronin-1C OS=Homo sapiens OX=9606 GN=CORO1C PE=1 SV=1			2.58		||0.56217|	2.58	NA	#VALUE!
P63241	57	EIF5A	IF5A1_HUMAN Eukaryotic translation initiation factor 5A-1 OS=Homo sapiens OX=9606 GN=EIF5A PE=1 SV=2	2.735	2.76	2.37	2.45	0.61374|0.56378|0.497|0.30322	2.57875	0.19784	7.67193
P27824	180	CANX	CALX_HUMAN Calnexin OS=Homo sapiens OX=9606 GN=CANX PE=1 SV=2	3.61	2.83	2.18	1.665	0.84018|0.80529|0.59231|0.33827	2.57125	0.8407	32.6962
Q9UJX3	395	ANAPC7	APC7_HUMAN Anaphase-promoting complex subunit 7 OS=Homo sapiens OX=9606 GN=ANAPC7 PE=1 SV=4	2.57				NA|||	2.57	NA	#VALUE!
P49327	1044	FASN	FAS_HUMAN Fatty acid synthase OS=Homo sapiens OX=9606 GN=FASN PE=1 SV=3	2.77	2.67	2.41	2.43	0.01414|1.35765|NA|0.61278	2.57	0.17814	6.93152
Q16576	369	RBBP7	RBBP7_HUMAN Histone-binding protein RBBP7 OS=Homo sapiens OX=9606 GN=RBBP7 PE=1 SV=1	2.57				NA|||	2.57	NA	#VALUE!
Q8IYS2	569	KIAA2013	K2013_HUMAN Uncharacterized protein KIAA2013 OS=Homo sapiens OX=9606 GN=KIAA2013 PE=1 SV=1		2.57			|NA||	2.57	NA	#VALUE!
O43143	317	DHX15	DHX15_HUMAN Pre-mRNA-splicing factor ATP-dependent RNA helicase DHX15 OS=Homo sapiens OX=9606 GN=DHX15 PE=1 SV=2				2.57	|||NA	2.57	NA	#VALUE!
P50402	23	EMD	EMD_HUMAN Emerin OS=Homo sapiens OX=9606 GN=EMD PE=1 SV=1	2.83	2.91	2.37	2.165	0.36226|0.45033|NA|0.80957	2.56875	0.35927	13.9862
P23381	445	WARS1	SYWC_HUMAN Tryptophan--tRNA ligase, cytoplasmic OS=Homo sapiens OX=9606 GN=WARS1 PE=1 SV=2	3.3	3.565	1.57	1.84	0.60103|0.40305|0.7305|0.16685	2.56875	1.00926	39.2899
P48643	264	CCT5	TCPE_HUMAN T-complex protein 1 subunit epsilon OS=Homo sapiens OX=9606 GN=CCT5 PE=1 SV=1	2.23	2.58		2.895	NA|NA||1.16673	2.56833	0.33265	12.952
P04908	125	H2AC4	H2A1B_HUMAN Histone H2A type 1-B/E OS=Homo sapiens OX=9606 GN=H2AC4 PE=1 SV=2	2.695	2.44			1.19115|0.89891||	2.5675	0.18031	7.02278
P08238	625	HSP90AB1	HS90B_HUMAN Heat shock protein HSP 90-beta OS=Homo sapiens OX=9606 GN=HSP90AB1 PE=1 SV=4	3.4	3.16	1.82	1.89	0.44554|0.99489|0.49191|0.58277	2.5675	0.82903	32.2894
Q5JU00	159	TCTE1	DRC5_HUMAN Dynein regulatory complex subunit 5 OS=Homo sapiens OX=9606 GN=TCTE1 PE=2 SV=1	2.675	3.21		1.815	0.36062|NA||0.28804	2.56667	0.70378	27.42
Q71U36	107	TUBA1A	TBA1A_HUMAN Tubulin alpha-1A chain OS=Homo sapiens OX=9606 GN=TUBA1A PE=1 SV=1	3.02	2.88	2.12	2.245	0.60912|0.63444|0.32512|0.46648	2.56625	0.44969	17.5232
O00148	42	DDX39A	DX39A_HUMAN ATP-dependent RNA helicase DDX39A OS=Homo sapiens OX=9606 GN=DDX39A PE=1 SV=2	2.025	2.39	2.79	3.05	0.84808|0.31729|0.36189|0.49043	2.56375	0.45021	17.5606
Q13838	43	DDX39B	DX39B_HUMAN Spliceosome RNA helicase DDX39B OS=Homo sapiens OX=9606 GN=DDX39B PE=1 SV=1	2.025	2.39	2.79	3.05	0.84808|0.31729|0.36189|0.49043	2.56375	0.45021	17.5606
P46783	84	RPS10	RS10_HUMAN 40S ribosomal protein S10 OS=Homo sapiens OX=9606 GN=RPS10 PE=1 SV=1	2.85	2.66	2.24	2.495	0.28236|0.40093|0.23999|0.50198	2.56125	0.25866	10.099
P00390	173	GSR	GSHR_HUMAN Glutathione reductase, mitochondrial OS=Homo sapiens OX=9606 GN=GSR PE=1 SV=2	3.07			2.05	NA|||NA	2.56	0.72125	28.1738
Q15717	201	ELAVL1	ELAV1_HUMAN ELAV-like protein 1 OS=Homo sapiens OX=9606 GN=ELAVL1 PE=1 SV=2	2.85	2.61	2.63	2.15	0.82977|0.38201|0.26896|0.4043	2.56	0.29417	11.491
Q9P287	101	BCCIP	BCCIP_HUMAN BRCA2 and CDKN1A-interacting protein OS=Homo sapiens OX=9606 GN=BCCIP PE=1 SV=1		3.37	2.13	2.18	|1.87033|NA|0.04619	2.56	0.70193	27.4191
P04406	279	GAPDH	G3P_HUMAN Glyceraldehyde-3-phosphate dehydrogenase OS=Homo sapiens OX=9606 GN=GAPDH PE=1 SV=3				2.56	|||NA	2.56	NA	#VALUE!
O00148	259	DDX39A	DX39A_HUMAN ATP-dependent RNA helicase DDX39A OS=Homo sapiens OX=9606 GN=DDX39A PE=1 SV=2		2.755	2.9	2.02	|0.17678|0.23094|0.66673	2.55833	0.47181	18.4421
Q13838	260	DDX39B	DX39B_HUMAN Spliceosome RNA helicase DDX39B OS=Homo sapiens OX=9606 GN=DDX39B PE=1 SV=1		2.755	2.9	2.02	|0.17678|0.23094|0.66673	2.55833	0.47181	18.4421
Q9H7Z7	123	PTGES2	PGES2_HUMAN Prostaglandin E synthase 2 OS=Homo sapiens OX=9606 GN=PTGES2 PE=1 SV=1	2.55				0.01414|||	2.55	NA	#VALUE!
P78527	2682	PRKDC	PRKDC_HUMAN DNA-dependent protein kinase catalytic subunit OS=Homo sapiens OX=9606 GN=PRKDC PE=1 SV=3		2.55			|NA||	2.55	NA	#VALUE!
Q8WTT2	699	NOC3L	NOC3L_HUMAN Nucleolar complex protein 3 homolog OS=Homo sapiens OX=9606 GN=NOC3L PE=1 SV=1			2.55		||NA|	2.55	NA	#VALUE!
Q92945	371	KHSRP	FUBP2_HUMAN Far upstream element-binding protein 2 OS=Homo sapiens OX=9606 GN=KHSRP PE=1 SV=4			1.82	3.28	||NA|NA	2.55	1.03238	40.4855
Q14151	766	SAFB2	SAFB2_HUMAN Scaffold attachment factor B2 OS=Homo sapiens OX=9606 GN=SAFB2 PE=1 SV=1	1.88			3.21	NA|||0.65054	2.545	0.94045	36.9528
Q15424	747	SAFB	SAFB1_HUMAN Scaffold attachment factor B1 OS=Homo sapiens OX=9606 GN=SAFB PE=1 SV=4	1.88			3.21	NA|||0.65054	2.545	0.94045	36.9528
P55072	499	VCP	TERA_HUMAN Transitional endoplasmic reticulum ATPase OS=Homo sapiens OX=9606 GN=VCP PE=1 SV=4		4.03		1.06	|1.13137||0.28284	2.545	2.10011	82.5191
Q12906	305	ILF3	ILF3_HUMAN Interleukin enhancer-binding factor 3 OS=Homo sapiens OX=9606 GN=ILF3 PE=1 SV=3	2.93	4.18	1.38	1.685	0.83631|0.69397|0.32004|1.15258	2.54375	1.2804	50.3351
P07237	438	P4HB	PDIA1_HUMAN Protein disulfide-isomerase OS=Homo sapiens OX=9606 GN=P4HB PE=1 SV=3	1.92	3.195	2.06	3	NA|0.76264|1.14551|0.50143	2.54375	0.64688	25.4302
P62899	30	RPL31	RL31_HUMAN 60S ribosomal protein L31 OS=Homo sapiens OX=9606 GN=RPL31 PE=1 SV=1	2.67	3.88	1.75	1.87	1.47968|NA|0.49305|0.60469	2.5425	0.98073	38.5735
Q12931	322	TRAP1	TRAP1_HUMAN Heat shock protein 75 kDa, mitochondrial OS=Homo sapiens OX=9606 GN=TRAP1 PE=1 SV=3	3.055	2.485		2.08	0.70004|2.53851||NA	2.54	0.48982	19.2843
P08238	442	HSP90AB1	HS90B_HUMAN Heat shock protein HSP 90-beta OS=Homo sapiens OX=9606 GN=HSP90AB1 PE=1 SV=4	2.98	3.185	1.9	2.095	0.9405|0.4851|0.48291|0.31927	2.54	0.63699	25.0783
P12236	40	SLC25A6	ADT3_HUMAN ADP/ATP translocase 3 OS=Homo sapiens OX=9606 GN=SLC25A6 PE=1 SV=4	2.46	2.86	2.36	2.48	0.40107|0.55938|0.6442|0.47698	2.54	0.2197	8.64961
P05141	40	SLC25A5	ADT2_HUMAN ADP/ATP translocase 2 OS=Homo sapiens OX=9606 GN=SLC25A5 PE=1 SV=7	2.46	2.86	2.36	2.48	0.40107|0.55938|0.6442|0.47698	2.54	0.2197	8.64961
P12235	40	SLC25A4	ADT1_HUMAN ADP/ATP translocase 1 OS=Homo sapiens OX=9606 GN=SLC25A4 PE=1 SV=4	2.46	2.86	2.36	2.48	0.40107|0.55938|0.6442|0.47698	2.54	0.2197	8.64961
P60866	92	RPS20	RS20_HUMAN 40S ribosomal protein S20 OS=Homo sapiens OX=9606 GN=RPS20 PE=1 SV=1	3.675	2.77	1.92	1.795	1.31406|0.60701|0.41409|0.35991	2.54	0.87188	34.326
P33992	692	MCM5	MCM5_HUMAN DNA replication licensing factor MCM5 OS=Homo sapiens OX=9606 GN=MCM5 PE=1 SV=5	2.54				NA|||	2.54	NA	#VALUE!
Q9NYF8	577	BCLAF1	BCLF1_HUMAN Bcl-2-associated transcription factor 1 OS=Homo sapiens OX=9606 GN=BCLAF1 PE=1 SV=2	3.06	3.785	1.465	1.835	NA|0.2192|0.56018|0.89803	2.53625	1.07595	42.4229
Q08945	569	SSRP1	SSRP1_HUMAN FACT complex subunit SSRP1 OS=Homo sapiens OX=9606 GN=SSRP1 PE=1 SV=1	2.765	3.625	1.8	1.93	0.54117|0.58632|0.52779|0.20165	2.53	0.846	33.4387
P22102	382	GART	PUR2_HUMAN Trifunctional purine biosynthetic protein adenosine-3 OS=Homo sapiens OX=9606 GN=GART PE=1 SV=1		2.49		2.57	|NA||0.1097	2.53	0.05657	2.23597
P18669	107	PGAM1	PGAM1_HUMAN Phosphoglycerate mutase 1 OS=Homo sapiens OX=9606 GN=PGAM1 PE=1 SV=2	3.275	3.27	2.07	1.5	0.37528|NA|NA|0.74953	2.52875	0.88978	35.1866
Q99497	126	PARK7	PARK7_HUMAN Parkinson disease protein 7 OS=Homo sapiens OX=9606 GN=PARK7 PE=1 SV=2	2.1	3.3	2.275	2.43	1.8809|0.37615|0.5869|0.44602	2.52625	0.53316	21.1048
Q71U36	266	TUBA1A	TBA1A_HUMAN Tubulin alpha-1A chain OS=Homo sapiens OX=9606 GN=TUBA1A PE=1 SV=1	3.04	3.04	2.04	1.97	0.35261|0.49429|0.48368|0.34448	2.5225	0.59824	23.7162
Q15631	46	TSN	TSN_HUMAN Translin OS=Homo sapiens OX=9606 GN=TSN PE=1 SV=1	2.72			2.325	0.0|||0.12021	2.5225	0.27931	11.0727
P42766	98	RPL35	RL35_HUMAN 60S ribosomal protein L35 OS=Homo sapiens OX=9606 GN=RPL35 PE=1 SV=2	2.48			2.56	NA|||NA	2.52	0.05657	2.24484
P35658	877	NUP214	NU214_HUMAN Nuclear pore complex protein Nup214 OS=Homo sapiens OX=9606 GN=NUP214 PE=1 SV=2	3.28		1.76		NA||NA|	2.52	1.0748	42.6508
Q96FW1	100	OTUB1	OTUB1_HUMAN Ubiquitin thioesterase OTUB1 OS=Homo sapiens OX=9606 GN=OTUB1 PE=1 SV=2		2.52			|NA||	2.52	NA	#VALUE!
P48752	419	IVa2	PKG1_ADE40 Packaging protein 1 OS=Human adenovirus F serotype 40 OX=28284 GN=IVa2 PE=3 SV=1				2.52	|||0.31628	2.52	NA	#VALUE!
P43243	401	MATR3	MATR3_HUMAN Matrin-3 OS=Homo sapiens OX=9606 GN=MATR3 PE=1 SV=2		2.9	2.135		|0.44456|0.30406|	2.5175	0.54094	21.4872
P48444	316	ARCN1	COPD_HUMAN Coatomer subunit delta OS=Homo sapiens OX=9606 GN=ARCN1 PE=1 SV=1	2.51				NA|||	2.51	NA	#VALUE!
P67812	96	SEC11A	SC11A_HUMAN Signal peptidase complex catalytic subunit SEC11A OS=Homo sapiens OX=9606 GN=SEC11A PE=1 SV=1	2.18			2.84	1.8809|||NA	2.51	0.46669	18.5932
P43490	90	NAMPT	NAMPT_HUMAN Nicotinamide phosphoribosyltransferase OS=Homo sapiens OX=9606 GN=NAMPT PE=1 SV=1	2.63	3.2		1.7	NA|NA||NA	2.51	0.75717	30.1661
P55084	89	HADHB	ECHB_HUMAN Trifunctional enzyme subunit beta, mitochondrial OS=Homo sapiens OX=9606 GN=HADHB PE=1 SV=3	2.195	3.38	2.315	2.15	1.41518|0.52814|0.45365|0.74995	2.51	0.58417	23.2737
Q9Y265	20	RUVBL1	RUVB1_HUMAN RuvB-like 1 OS=Homo sapiens OX=9606 GN=RUVBL1 PE=1 SV=1		2.9		2.12	|NA||NA	2.51	0.55154	21.9737
P06493	205	CDK1	CDK1_HUMAN Cyclin-dependent kinase 1 OS=Homo sapiens OX=9606 GN=CDK1 PE=1 SV=3	3.25	2.39		1.885	NA|0.28284||1.06773	2.50833	0.69015	27.5143
Q00610	1233	CLTC	CLH1_HUMAN Clathrin heavy chain 1 OS=Homo sapiens OX=9606 GN=CLTC PE=1 SV=5	2.89	2.7	2.02	2.42	0.25382|0.55243|0.0|0.53842	2.5075	0.37801	15.0752
P35580	693	MYH10	MYH10_HUMAN Myosin-10 OS=Homo sapiens OX=9606 GN=MYH10 PE=1 SV=3	3.41	2.58	2.1	1.935	0.85484|0.72536|0.47153|0.24948	2.50625	0.66171	26.4024
P35579	686	MYH9	MYH9_HUMAN Myosin-9 OS=Homo sapiens OX=9606 GN=MYH9 PE=1 SV=4	3.41	2.58	2.1	1.935	0.85484|0.72536|0.47153|0.24948	2.50625	0.66171	26.4024
Q14697	397	GANAB	GANAB_HUMAN Neutral alpha-glucosidase AB OS=Homo sapiens OX=9606 GN=GANAB PE=1 SV=3	2.89	2.82	1.89	2.425	0.0|NA|NA|0.7566	2.50625	0.45901	18.3146
P36507	104	MAP2K2	MP2K2_HUMAN Dual specificity mitogen-activated protein kinase kinase 2 OS=Homo sapiens OX=9606 GN=MAP2K2 PE=1 SV=1	2.06			2.95	NA|||NA	2.505	0.62933	25.123
P27635	147	RPL10	RL10_HUMAN 60S ribosomal protein L10 OS=Homo sapiens OX=9606 GN=RPL10 PE=1 SV=4	2.975	3.1	2.155	1.785	1.0932|0.99007|0.77945|0.44042	2.50375	0.63661	25.4263
Q5VTE0	136	EEF1A1P5	EF1A3_HUMAN Putative elongation factor 1-alpha-like 3 OS=Homo sapiens OX=9606 GN=EEF1A1P5 PE=5 SV=1	2.86	2.96	2.15	2.04	0.5397|0.46939|0.21022|0.51181	2.5025	0.47444	18.9586
Q05639	136	EEF1A2	EF1A2_HUMAN Elongation factor 1-alpha 2 OS=Homo sapiens OX=9606 GN=EEF1A2 PE=1 SV=1	2.86	2.96	2.15	2.04	0.5397|0.46939|0.21022|0.51181	2.5025	0.47444	18.9586
P09496	248	CLTA	CLCA_HUMAN Clathrin light chain A OS=Homo sapiens OX=9606 GN=CLTA PE=1 SV=1	2.5				NA|||	2.5	NA	#VALUE!
P32969	98	RPL9	RL9_HUMAN 60S ribosomal protein L9 OS=Homo sapiens OX=9606 GN=RPL9 PE=1 SV=1	2.5				NA|||	2.5	NA	#VALUE!
O15344	169	MID1	TRI18_HUMAN E3 ubiquitin-protein ligase Midline-1 OS=Homo sapiens OX=9606 GN=MID1 PE=1 SV=1		2.5			|NA||	2.5	NA	#VALUE!
P53396	997	ACLY	ACLY_HUMAN ATP-citrate synthase OS=Homo sapiens OX=9606 GN=ACLY PE=1 SV=3	3.06	3.08	2.08	1.77	0.76368|0.11314|0.34598|0.17527	2.4975	0.67312	26.9518
Q99832	390	CCT7	TCPH_HUMAN T-complex protein 1 subunit eta OS=Homo sapiens OX=9606 GN=CCT7 PE=1 SV=2	2.68	3.775	1.71	1.805	1.18794|0.32735|0.82002|0.87199	2.4925	0.96002	38.5163
P07437	28	TUBB	TBB5_HUMAN Tubulin beta chain OS=Homo sapiens OX=9606 GN=TUBB PE=1 SV=2	3.47	3.48	1.41	1.61	0.11314|0.56045|0.25734|0.33176	2.4925	1.13743	45.6341
P08670	253	VIM	VIME_HUMAN Vimentin OS=Homo sapiens OX=9606 GN=VIM PE=1 SV=4	3.55			1.43	NA|||0.10392	2.49	1.49907	60.2036
P46100	1722	ATRX	ATRX_HUMAN Transcriptional regulator ATRX OS=Homo sapiens OX=9606 GN=ATRX PE=1 SV=5				2.49	|||NA	2.49	NA	#VALUE!
P51571	98	SSR4	SSRD_HUMAN Translocon-associated protein subunit delta OS=Homo sapiens OX=9606 GN=SSR4 PE=1 SV=1	2.44	3.5	2	2.01	NA|0.31003|0.75811|0.58206	2.4875	0.70547	28.3606
Q13435	572	SF3B2	SF3B2_HUMAN Splicing factor 3B subunit 2 OS=Homo sapiens OX=9606 GN=SF3B2 PE=1 SV=2	2.61	2.805	2.585	1.95	0.74953|1.05359|0.72832|0.39357	2.4875	0.37158	14.9379
Q8NC51	206	SERBP1	PAIRB_HUMAN Plasminogen activator inhibitor 1 RNA-binding protein OS=Homo sapiens OX=9606 GN=SERBP1 PE=1 SV=2	3.19		2.82	1.44	NA||NA|0.98995	2.48333	0.9223	37.1396
Q12905	192	ILF2	ILF2_HUMAN Interleukin enhancer-binding factor 2 OS=Homo sapiens OX=9606 GN=ILF2 PE=1 SV=2	3.04	2.53		1.88	1.4425|NA||NA	2.48333	0.58141	23.4125
Q8WU90	209	ZC3H15	ZC3HF_HUMAN Zinc finger CCCH domain-containing protein 15 OS=Homo sapiens OX=9606 GN=ZC3H15 PE=1 SV=1		3.11	2.02	2.32	|0.19799|0.30386|0.21008	2.48333	0.56306	22.6736
P62917	50	RPL8	RL8_HUMAN 60S ribosomal protein L8 OS=Homo sapiens OX=9606 GN=RPL8 PE=1 SV=2	3.355	3.02	1.765	1.79	0.89496|1.10859|0.41909|0.57582	2.4825	0.82554	33.2544
P61978	152	HNRNPK	HNRPK_HUMAN Heterogeneous nuclear ribonucleoprotein K OS=Homo sapiens OX=9606 GN=HNRNPK PE=1 SV=1	2.28	2.55	2.64	2.46	0.24631|0.63257|0.3095|0.47002	2.4825	0.1537	6.19134
P35579	376	MYH9	MYH9_HUMAN Myosin-9 OS=Homo sapiens OX=9606 GN=MYH9 PE=1 SV=4	2.41	3.025	2.29	2.2	NA|0.24749|0.2823|0.40078	2.48125	0.37257	15.0154
O14980	333	XPO1	XPO1_HUMAN Exportin-1 OS=Homo sapiens OX=9606 GN=XPO1 PE=1 SV=1	2.48				0.0|||	2.48	NA	#VALUE!
Q8N163	799	CCAR2	CCAR2_HUMAN Cell cycle and apoptosis regulator protein 2 OS=Homo sapiens OX=9606 GN=CCAR2 PE=1 SV=2		2.48			|NA||	2.48	NA	#VALUE!
P46777	244	RPL5	RL5_HUMAN 60S ribosomal protein L5 OS=Homo sapiens OX=9606 GN=RPL5 PE=1 SV=3		2.48			|0.0||	2.48	NA	#VALUE!
Q9Y3D9	142	MRPS23	RT23_HUMAN 28S ribosomal protein S23, mitochondrial OS=Homo sapiens OX=9606 GN=MRPS23 PE=1 SV=2				2.48	|||NA	2.48	NA	#VALUE!
P04075	246	ALDOA	ALDOA_HUMAN Fructose-bisphosphate aldolase A OS=Homo sapiens OX=9606 GN=ALDOA PE=1 SV=2	1.41	2.79	2.89	2.825	0.49319|NA|0.0|0.37477	2.47875	0.7137	28.7927
P31943	99	HNRNPH1	HNRH1_HUMAN Heterogeneous nuclear ribonucleoprotein H OS=Homo sapiens OX=9606 GN=HNRNPH1 PE=1 SV=4	3.075	3.245	1.855	1.73	0.83527|0.66521|0.23555|0.50641	2.47625	0.79421	32.0731
Q15717	213	ELAVL1	ELAV1_HUMAN ELAV-like protein 1 OS=Homo sapiens OX=9606 GN=ELAVL1 PE=1 SV=2		1.695	3.01	2.72	|0.12021|NA|NA	2.475	0.69089	27.9147
P14618	379	PKM	KPYM_HUMAN Pyruvate kinase PKM OS=Homo sapiens OX=9606 GN=PKM PE=1 SV=4	3.28	2.39	2.57	1.65	NA|0.67833|0.83243|NA	2.4725	0.66955	27.0799
P41091	33	EIF2S3	IF2G_HUMAN Eukaryotic translation initiation factor 2 subunit 3 OS=Homo sapiens OX=9606 GN=EIF2S3 PE=1 SV=3	3.115		1.83		0.13435||NA|	2.4725	0.90863	36.7494
O75533	276	SF3B1	SF3B1_HUMAN Splicing factor 3B subunit 1 OS=Homo sapiens OX=9606 GN=SF3B1 PE=1 SV=3	2.24	3.36	2.145	2.14	1.1738|1.86676|0.52275|0.35355	2.47125	0.59428	24.0477
P07205	391	PGK2	PGK2_HUMAN Phosphoglycerate kinase 2 OS=Homo sapiens OX=9606 GN=PGK2 PE=1 SV=3	2.47				1.35819|||	2.47	NA	#VALUE!
Q96F86	246	EDC3	EDC3_HUMAN Enhancer of mRNA-decapping protein 3 OS=Homo sapiens OX=9606 GN=EDC3 PE=1 SV=1	2.47				NA|||	2.47	NA	#VALUE!
P03243	387		E1B55_ADE05 E1B 55 kDa protein OS=Human adenovirus C serotype 5 OX=28285 PE=1 SV=1	2.57	3.24	1.99	2.08	NA|NA|NA|0.13614	2.47	0.57312	23.2032
Q15084	87	PDIA6	PDIA6_HUMAN Protein disulfide-isomerase A6 OS=Homo sapiens OX=9606 GN=PDIA6 PE=1 SV=1		2.61	2.89	1.905	|NA|NA|0.86974	2.46833	0.50755	20.5625
Q08752	109	PPID	PPID_HUMAN Peptidyl-prolyl cis-trans isomerase D OS=Homo sapiens OX=9606 GN=PPID PE=1 SV=3		4.48	1.93	0.99	|NA|0.0|0.38038	2.46667	1.80583	73.2092
P27824	201	CANX	CALX_HUMAN Calnexin OS=Homo sapiens OX=9606 GN=CANX PE=1 SV=2	1.49		3.065	2.84	0.73539||1.20645|0.04243	2.465	0.85184	34.5574
Q15008	31	PSMD6	PSMD6_HUMAN 26S proteasome non-ATPase regulatory subunit 6 OS=Homo sapiens OX=9606 GN=PSMD6 PE=1 SV=1			2.41	2.52	||NA|NA	2.465	0.07778	3.15538
Q96FW1	192	OTUB1	OTUB1_HUMAN Ubiquitin thioesterase OTUB1 OS=Homo sapiens OX=9606 GN=OTUB1 PE=1 SV=2	2.6	2.43	2.31	2.515	0.46918|NA|0.69296|0.30406	2.46375	0.12379	5.02445
O14737	21	PDCD5	PDCD5_HUMAN Programmed cell death protein 5 OS=Homo sapiens OX=9606 GN=PDCD5 PE=1 SV=3	3.165	2.86		1.365	1.32229|NA||0.38891	2.46333	0.96333	39.1068
Q00839	517	HNRNPU	HNRPU_HUMAN Heterogeneous nuclear ribonucleoprotein U OS=Homo sapiens OX=9606 GN=HNRNPU PE=1 SV=6	2.91	3.07	1.85	2.02	0.31374|1.17574|0.15453|0.10644	2.4625	0.61652	25.0363
P50213	199	IDH3A	IDH3A_HUMAN Isocitrate dehydrogenase [NAD] subunit alpha, mitochondrial OS=Homo sapiens OX=9606 GN=IDH3A PE=1 SV=1		4.23	1.48	1.67	|NA|NA|NA	2.46	1.53581	62.4313
Q9BPX3	286	NCAPG	CND3_HUMAN Condensin complex subunit 3 OS=Homo sapiens OX=9606 GN=NCAPG PE=1 SV=1			2.46		||0.0|	2.46	NA	#VALUE!
P40227	382	CCT6A	TCPZ_HUMAN T-complex protein 1 subunit zeta OS=Homo sapiens OX=9606 GN=CCT6A PE=1 SV=3	2.995	3.18	1.16	2.5	0.00707|0.3838|0.74953|0.54997	2.45875	0.91218	37.0993
P54136	165	RARS1	SYRC_HUMAN Arginine--tRNA ligase, cytoplasmic OS=Homo sapiens OX=9606 GN=RARS1 PE=1 SV=2	3.385	3.455	1.905	1.09	0.06364|2.22739|0.43563|0.72125	2.45875	1.1591	47.1418
P43243	101	MATR3	MATR3_HUMAN Matrin-3 OS=Homo sapiens OX=9606 GN=MATR3 PE=1 SV=2	2.705	3.075	2.32	1.73	0.40909|0.44388|0.80711|0.5369	2.4575	0.57467	23.3843
Q8IUF8	200	RIOX2	RIOX2_HUMAN Ribosomal oxygenase 2 OS=Homo sapiens OX=9606 GN=RIOX2 PE=1 SV=1	2.335	2.58			0.92631|NA||	2.4575	0.17324	7.04944
Q07955	183	SRSF1	SRSF1_HUMAN Serine/arginine-rich splicing factor 1 OS=Homo sapiens OX=9606 GN=SRSF1 PE=1 SV=2	1.59	3.7	2.305	2.23	NA|NA|1.30815|0.24214	2.45625	0.88908	36.1966
O60814	50	H2BC12	H2B1K_HUMAN Histone H2B type 1-K OS=Homo sapiens OX=9606 GN=H2BC12 PE=1 SV=3	3.17		2.165	2.03	0.98885||0.28872|0.32138	2.455	0.62288	25.3719
P06899	50	H2BC11	H2B1J_HUMAN Histone H2B type 1-J OS=Homo sapiens OX=9606 GN=H2BC11 PE=1 SV=3	3.17		2.165	2.03	0.98885||0.28872|0.32138	2.455	0.62288	25.3719
P22234	49	PAICS	PUR6_HUMAN Multifunctional protein ADE2 OS=Homo sapiens OX=9606 GN=PAICS PE=1 SV=3		2.76	2.15		|NA|NA|	2.455	0.43134	17.5699
P78371	337	CCT2	TCPB_HUMAN T-complex protein 1 subunit beta OS=Homo sapiens OX=9606 GN=CCT2 PE=1 SV=4		2.87	1.74	2.75	|1.90919|0.27993|0.37566	2.45333	0.62067	25.2991
P46781	125	RPS9	RS9_HUMAN 40S ribosomal protein S9 OS=Homo sapiens OX=9606 GN=RPS9 PE=1 SV=3	3.04		1.865		0.18009||0.20506|	2.4525	0.83085	33.8777
P55060	933	CSE1L	XPO2_HUMAN Exportin-2 OS=Homo sapiens OX=9606 GN=CSE1L PE=1 SV=3	3.56	3.02	1.26	1.97	0.0|0.0|NA|0.085	2.4525	1.03336	42.135
P43243	505	MATR3	MATR3_HUMAN Matrin-3 OS=Homo sapiens OX=9606 GN=MATR3 PE=1 SV=2	3.05	2.85	2.065	1.84	0.59141|0.60736|0.48391|0.40882	2.45125	0.58887	24.0233
Q15181	224	PPA1	IPYR_HUMAN Inorganic pyrophosphatase OS=Homo sapiens OX=9606 GN=PPA1 PE=1 SV=2	2.57	3.11	2.01	2.11	0.0|NA|NA|0.08145	2.45	0.50306	20.5331
P30405	112	PPIF	PPIF_HUMAN Peptidyl-prolyl cis-trans isomerase F, mitochondrial OS=Homo sapiens OX=9606 GN=PPIF PE=1 SV=1			2.45		||0.62362|	2.45	NA	#VALUE!
O95373	120	IPO7	IPO7_HUMAN Importin-7 OS=Homo sapiens OX=9606 GN=IPO7 PE=1 SV=1				2.45	|||NA	2.45	NA	#VALUE!
P06737	58	PYGL	PYGL_HUMAN Glycogen phosphorylase, liver form OS=Homo sapiens OX=9606 GN=PYGL PE=1 SV=4				2.45	|||NA	2.45	NA	#VALUE!
Q8NC51	326	SERBP1	PAIRB_HUMAN Plasminogen activator inhibitor 1 RNA-binding protein OS=Homo sapiens OX=9606 GN=SERBP1 PE=1 SV=2	3.03	1.98	2.36	2.42	NA|NA|0.62867|0.04041	2.4475	0.43446	17.7512
P62081	168	RPS7	RS7_HUMAN 40S ribosomal protein S7 OS=Homo sapiens OX=9606 GN=RPS7 PE=1 SV=1	3.28	2.58	2	1.92	1.50071|1.19508|0.45255|0.10392	2.445	0.62958	25.7497
P43487	11	RANBP1	RANG_HUMAN Ran-specific GTPase-activating protein OS=Homo sapiens OX=9606 GN=RANBP1 PE=1 SV=1	3.7			1.19	NA|||0.0	2.445	1.77484	72.5906
P57088	76	TMEM33	TMM33_HUMAN Transmembrane protein 33 OS=Homo sapiens OX=9606 GN=TMEM33 PE=1 SV=2	2.9	2.68	1.905	2.29	0.34838|1.71267|0.79223|NA	2.44375	0.43889	17.9597
Q6FI13	125	H2AC18	H2A2A_HUMAN Histone H2A type 2-A OS=Homo sapiens OX=9606 GN=H2AC18 PE=1 SV=3		2.44			|0.89891||	2.44	NA	#VALUE!
P13010	575	XRCC5	XRCC5_HUMAN X-ray repair cross-complementing protein 5 OS=Homo sapiens OX=9606 GN=XRCC5 PE=1 SV=3				2.44	|||NA	2.44	NA	#VALUE!
P62917	139	RPL8	RL8_HUMAN 60S ribosomal protein L8 OS=Homo sapiens OX=9606 GN=RPL8 PE=1 SV=2	3.76	2.855	1.16	1.98	NA|0.95781|NA|0.37041	2.43875	1.12021	45.9338
Q9Y3T9	171	NOC2L	NOC2L_HUMAN Nucleolar complex protein 2 homolog OS=Homo sapiens OX=9606 GN=NOC2L PE=1 SV=4	2.76	3.52	2.05	1.42	1.0595|NA|NA|0.19053	2.4375	0.90577	37.1598
P99999	34	CYCS	CYC_HUMAN Cytochrome c OS=Homo sapiens OX=9606 GN=CYCS PE=1 SV=2	2.78	2.74	2.13	2.08	NA|0.28284|0.82024|0.58287	2.4325	0.37907	15.5836
Q86Y56	98	DNAAF5	DAAF5_HUMAN Dynein assembly factor 5, axonemal OS=Homo sapiens OX=9606 GN=DNAAF5 PE=1 SV=4	1.71	3.41	2.16		NA|NA|NA|	2.42667	0.88081	36.2971
P27635	130	RPL10	RL10_HUMAN 60S ribosomal protein L10 OS=Homo sapiens OX=9606 GN=RPL10 PE=1 SV=4	2.18	3.04	2.78	1.705	0.0|0.73|NA|0.71418	2.42625	0.60074	24.76
P07900	450	HSP90AA1	HS90A_HUMAN Heat shock protein HSP 90-alpha OS=Homo sapiens OX=9606 GN=HSP90AA1 PE=1 SV=5	3.41	2.97	1.55	1.77	0.78589|0.59577|0.3183|0.2158	2.425	0.90589	37.3563
Q9H9B4	27	SFXN1	SFXN1_HUMAN Sideroflexin-1 OS=Homo sapiens OX=9606 GN=SFXN1 PE=1 SV=4	3.31	2.25	2.57	1.57	NA|0.50176|NA|0.19296	2.425	0.72247	29.7926
P54577	266	YARS1	SYYC_HUMAN Tyrosine--tRNA ligase, cytoplasmic OS=Homo sapiens OX=9606 GN=YARS1 PE=1 SV=4	2.86	2.675	2.215	1.95	0.06245|0.9383|0.48959|0.72089	2.425	0.41691	17.1922
Q71UI9	113	H2AZ2	H2AV_HUMAN Histone H2A.V OS=Homo sapiens OX=9606 GN=H2AZ2 PE=1 SV=3	2.94	2.55	1.76	2.44	0.67623|1.77011|0.56533|0.66803	2.4225	0.49101	20.2687
O14980	704	XPO1	XPO1_HUMAN Exportin-1 OS=Homo sapiens OX=9606 GN=XPO1 PE=1 SV=1	3.02	2.04		2.2	0.34819|NA||0.24334	2.42	0.52574	21.7248
P28370	671	SMARCA1	SMCA1_HUMAN Probable global transcription activator SNF2L1 OS=Homo sapiens OX=9606 GN=SMARCA1 PE=1 SV=2		2.42			|NA||	2.42	NA	#VALUE!
P28482	147	MAPK1	MK01_HUMAN Mitogen-activated protein kinase 1 OS=Homo sapiens OX=9606 GN=MAPK1 PE=1 SV=3		2.42			|NA||	2.42	NA	#VALUE!
P27361	164	MAPK3	MK03_HUMAN Mitogen-activated protein kinase 3 OS=Homo sapiens OX=9606 GN=MAPK3 PE=1 SV=4		2.42			|NA||	2.42	NA	#VALUE!
Q9UBQ7	280	GRHPR	GRHPR_HUMAN Glyoxylate reductase/hydroxypyruvate reductase OS=Homo sapiens OX=9606 GN=GRHPR PE=1 SV=1		3.17		1.67	|NA||0.0	2.42	1.06066	43.8289
Q9BRG1	160	VPS25	VPS25_HUMAN Vacuolar protein-sorting-associated protein 25 OS=Homo sapiens OX=9606 GN=VPS25 PE=1 SV=1				2.42	|||NA	2.42	NA	#VALUE!
P41227	170	NAA10	NAA10_HUMAN N-alpha-acetyltransferase 10 OS=Homo sapiens OX=9606 GN=NAA10 PE=1 SV=1	3.85	1.98	1.955	1.885	0.09899|1.00409|0.91217|0.33234	2.4175	0.95585	39.5388
P12532	414	CKMT1A	KCRU_HUMAN Creatine kinase U-type, mitochondrial OS=Homo sapiens OX=9606 GN=CKMT1A PE=1 SV=1	2.215		3.25	1.785	1.40714||0.79775|0.91217	2.41667	0.75303	31.1598
P18031	54	PTPN1	PTN1_HUMAN Tyrosine-protein phosphatase non-receptor type 1 OS=Homo sapiens OX=9606 GN=PTPN1 PE=1 SV=1		2.86		1.97	|NA||NA	2.415	0.62933	26.0592
P07900	633	HSP90AA1	HS90A_HUMAN Heat shock protein HSP 90-alpha OS=Homo sapiens OX=9606 GN=HSP90AA1 PE=1 SV=5	2.94	3.29	1.7	1.71	1.3074|1.49241|0.637|0.51178	2.41	0.82652	34.2954
Q16891	490	IMMT	MIC60_HUMAN MICOS complex subunit MIC60 OS=Homo sapiens OX=9606 GN=IMMT PE=1 SV=1		2.82		2	|NA||NA	2.41	0.57983	24.0593
Q14697	676	GANAB	GANAB_HUMAN Neutral alpha-glucosidase AB OS=Homo sapiens OX=9606 GN=GANAB PE=1 SV=3		3.09		1.73	|0.01414||0.86979	2.41	0.96167	39.9033
Q02790	248	FKBP4	FKBP4_HUMAN Peptidyl-prolyl cis-trans isomerase FKBP4 OS=Homo sapiens OX=9606 GN=FKBP4 PE=1 SV=3		2.92	2.29	2.02	|NA|NA|0.19704	2.41	0.46184	19.1635
P23396	159	RPS3	RS3_HUMAN 40S ribosomal protein S3 OS=Homo sapiens OX=9606 GN=RPS3 PE=1 SV=2				2.41	|||0.0	2.41	NA	#VALUE!
Q14103	86	HNRNPD	HNRPD_HUMAN Heterogeneous nuclear ribonucleoprotein D0 OS=Homo sapiens OX=9606 GN=HNRNPD PE=1 SV=1	2.86	3.15	1.57	2.055	0.01528|0.77782|0.31113|0.14841	2.40875	0.72611	30.1447
P60660	111	MYL6	MYL6_HUMAN Myosin light polypeptide 6 OS=Homo sapiens OX=9606 GN=MYL6 PE=1 SV=2	2.34	3.22	1.89	2.18	0.4817|0.0|0.673|0.34239	2.4075	0.57279	23.7919
P22392	118	NME2	NDKB_HUMAN Nucleoside diphosphate kinase B OS=Homo sapiens OX=9606 GN=NME2 PE=1 SV=1	3.32	2.76	1.72	1.82	0.35539|0.6579|0.04761|0.45057	2.405	0.76913	31.9805
Q8IYD1	282	GSPT2	ERF3B_HUMAN Eukaryotic peptide chain release factor GTP-binding subunit ERF3B OS=Homo sapiens OX=9606 GN=GSPT2 PE=1 SV=2			1.77	3.04	||NA|NA	2.405	0.89803	37.3401
P15170	153	GSPT1	ERF3A_HUMAN Eukaryotic peptide chain release factor GTP-binding subunit ERF3A OS=Homo sapiens OX=9606 GN=GSPT1 PE=1 SV=1			1.77	3.04	||NA|NA	2.405	0.89803	37.3401
Q8NC51	222	SERBP1	PAIRB_HUMAN Plasminogen activator inhibitor 1 RNA-binding protein OS=Homo sapiens OX=9606 GN=SERBP1 PE=1 SV=2	3.32	1.73	2.16		NA|NA|0.34316|	2.40333	0.82246	34.2217
P00558	391	PGK1	PGK1_HUMAN Phosphoglycerate kinase 1 OS=Homo sapiens OX=9606 GN=PGK1 PE=1 SV=3	2.47	3.52	1.605	2.01	1.35819|0.68621|0.49082|0.41153	2.40125	0.82531	34.37
P62879	91	GNB2	GBB2_HUMAN Guanine nucleotide-binding protein G(I)/G(S)/G(T) subunit beta-2 OS=Homo sapiens OX=9606 GN=GNB2 PE=1 SV=3	1.83	3.37	2.22	2.18	0.72666|1.00485|0.23251|0.81788	2.4	0.66998	27.9158
Q15046	85	KARS1	SYK_HUMAN Lysine--tRNA ligase OS=Homo sapiens OX=9606 GN=KARS1 PE=1 SV=3			2.35	2.45	||NA|1.16863	2.4	0.07071	2.94625
P51610	258	HCFC1	HCFC1_HUMAN Host cell factor 1 OS=Homo sapiens OX=9606 GN=HCFC1 PE=1 SV=2			2.23	2.57	||NA|0.27062	2.4	0.24042	10.0175
Q99613	630	EIF3C	EIF3C_HUMAN Eukaryotic translation initiation factor 3 subunit C OS=Homo sapiens OX=9606 GN=EIF3C PE=1 SV=1	3.86		1.65	1.68	0.90644||0.34924|0.82993	2.39667	1.26737	52.8805
Q99613	736	EIF3C	EIF3C_HUMAN Eukaryotic translation initiation factor 3 subunit C OS=Homo sapiens OX=9606 GN=EIF3C PE=1 SV=1	2.825			1.965	0.37669|||0.09192	2.395	0.60811	25.3908
Q00839	357	HNRNPU	HNRPU_HUMAN Heterogeneous nuclear ribonucleoprotein U OS=Homo sapiens OX=9606 GN=HNRNPU PE=1 SV=6	2.36	3.29	1.86	2.05	1.12837|0.9825|0.4879|0.47317	2.39	0.6344	26.5439
Q02880	699	TOP2B	TOP2B_HUMAN DNA topoisomerase 2-beta OS=Homo sapiens OX=9606 GN=TOP2B PE=1 SV=3	2.88			1.9	0.0|||NA	2.39	0.69296	28.9941
P16152	265	CBR1	CBR1_HUMAN Carbonyl reductase [NADPH] 1 OS=Homo sapiens OX=9606 GN=CBR1 PE=1 SV=3	2.39				NA|||	2.39	NA	#VALUE!
Q9NSD9	438	FARSB	SYFB_HUMAN Phenylalanine--tRNA ligase beta subunit OS=Homo sapiens OX=9606 GN=FARSB PE=1 SV=3				2.39	|||0.74969	2.39	NA	#VALUE!
O00567	83	NOP56	NOP56_HUMAN Nucleolar protein 56 OS=Homo sapiens OX=9606 GN=NOP56 PE=1 SV=4				2.39	|||NA	2.39	NA	#VALUE!
P04406	137	GAPDH	G3P_HUMAN Glyceraldehyde-3-phosphate dehydrogenase OS=Homo sapiens OX=9606 GN=GAPDH PE=1 SV=3	3.25	2.655	1.53	2.12	NA|0.96362|0.15631|NA	2.38875	0.73537	30.7847
Q92530	155	PSMF1	PSMF1_HUMAN Proteasome inhibitor PI31 subunit OS=Homo sapiens OX=9606 GN=PSMF1 PE=1 SV=2	2.29	2.66	2.93	1.65	0.23094|NA|NA|NA	2.3825	0.55434	23.2672
P09874	66	PARP1	PARP1_HUMAN Poly [ADP-ribose] polymerase 1 OS=Homo sapiens OX=9606 GN=PARP1 PE=1 SV=4	3	3.23	1.75	1.55	0.61089|1.08067|0.43243|0.30423	2.3825	0.85492	35.8833
P62753	70	RPS6	RS6_HUMAN 40S ribosomal protein S6 OS=Homo sapiens OX=9606 GN=RPS6 PE=1 SV=1	3.01	2.59	2.42	1.505	NA|NA|0.22113|0.03536	2.38125	0.63462	26.6507
Q9NR31	43	SAR1A	SAR1A_HUMAN GTP-binding protein SAR1a OS=Homo sapiens OX=9606 GN=SAR1A PE=1 SV=1	2.38				NA|||	2.38	NA	#VALUE!
P31689	290	DNAJA1	DNJA1_HUMAN DnaJ homolog subfamily A member 1 OS=Homo sapiens OX=9606 GN=DNAJA1 PE=1 SV=2	2.785	3.7	0.84	2.19	0.9277|NA|0.2687|0.15556	2.37875	1.19918	50.4122
Q6UX04	127	CWC27	CWC27_HUMAN Spliceosome-associated protein CWC27 homolog OS=Homo sapiens OX=9606 GN=CWC27 PE=1 SV=1	2.72		2.3	2.11	NA||0.25534|0.37287	2.37667	0.31214	13.1335
Q9GZZ1	14	NAA50	NAA50_HUMAN N-alpha-acetyltransferase 50 OS=Homo sapiens OX=9606 GN=NAA50 PE=1 SV=1	2.39	3.46	2.29	1.36	0.11314|1.33402|0.00577|0.72125	2.375	0.85924	36.1785
P25398	72	RPS12	RS12_HUMAN 40S ribosomal protein S12 OS=Homo sapiens OX=9606 GN=RPS12 PE=1 SV=3	2.6	2.41	2.85	1.625	0.0|1.93747|NA|0.06364	2.37125	0.52912	22.314
O00571	628	DDX3X	DDX3X_HUMAN ATP-dependent RNA helicase DDX3X OS=Homo sapiens OX=9606 GN=DDX3X PE=1 SV=3	2.37				0.0|||	2.37	NA	#VALUE!
P50990	80	CCT8	TCPQ_HUMAN T-complex protein 1 subunit theta OS=Homo sapiens OX=9606 GN=CCT8 PE=1 SV=4	2.59	3.69	1.83	1.37	NA|1.27143|NA|0.33712	2.37	1.01364	42.7696
P51991	54	HNRNPA3	ROA3_HUMAN Heterogeneous nuclear ribonucleoprotein A3 OS=Homo sapiens OX=9606 GN=HNRNPA3 PE=1 SV=2				2.37	|||NA	2.37	NA	#VALUE!
P04406	330	GAPDH	G3P_HUMAN Glyceraldehyde-3-phosphate dehydrogenase OS=Homo sapiens OX=9606 GN=GAPDH PE=1 SV=3	2.55	3.37	1.955	1.6	0.71598|0.48127|0.13279|0.55578	2.36875	0.77406	32.678
Q92522	142	H1-10	H1X_HUMAN Histone H1.10 OS=Homo sapiens OX=9606 GN=H1-10 PE=1 SV=1	3.485		1.63	1.985	1.32229||NA|0.02121	2.36667	0.98464	41.6044
P23246	369	SFPQ	SFPQ_HUMAN Splicing factor, proline- and glutamine-rich OS=Homo sapiens OX=9606 GN=SFPQ PE=1 SV=2	3.53		2.2	1.37	1.411||NA|NA	2.36667	1.0896	46.0394
Q9H9B4	310	SFXN1	SFXN1_HUMAN Sideroflexin-1 OS=Homo sapiens OX=9606 GN=SFXN1 PE=1 SV=4	2.99			1.74	NA|||0.0	2.365	0.88388	37.3734
Q13162	72	PRDX4	PRDX4_HUMAN Peroxiredoxin-4 OS=Homo sapiens OX=9606 GN=PRDX4 PE=1 SV=1	2.63	2.37	2.12	2.34	0.46669|1.00629|0.33828|0.54951	2.365	0.20889	8.83256
P30048	197	PRDX3	PRDX3_HUMAN Thioredoxin-dependent peroxide reductase, mitochondrial OS=Homo sapiens OX=9606 GN=PRDX3 PE=1 SV=3		3.31	1.57	2.21	|NA|0.57878|NA	2.36333	0.88008	37.239
P11586	873	MTHFD1	C1TC_HUMAN C-1-tetrahydrofolate synthase, cytoplasmic OS=Homo sapiens OX=9606 GN=MTHFD1 PE=1 SV=3	3.1	2.94	1.96	1.445	1.27529|NA|0.62217|0.54447	2.36125	0.79188	33.5365
Q9NSI2	145	FAM207A	F207A_HUMAN Protein FAM207A OS=Homo sapiens OX=9606 GN=FAM207A PE=1 SV=2		2.33	2.81	1.94	|0.0|NA|NA	2.36	0.43578	18.4653
P56192	126	MARS1	SYMC_HUMAN Methionine--tRNA ligase, cytoplasmic OS=Homo sapiens OX=9606 GN=MARS1 PE=1 SV=2			2.36		||NA|	2.36	NA	#VALUE!
Q9UHI6	319	DDX20	DDX20_HUMAN Probable ATP-dependent RNA helicase DDX20 OS=Homo sapiens OX=9606 GN=DDX20 PE=1 SV=2			2.36		||0.14142|	2.36	NA	#VALUE!
P49327	2258	FASN	FAS_HUMAN Fatty acid synthase OS=Homo sapiens OX=9606 GN=FASN PE=1 SV=3	1.83	2.41	3.86	1.33	NA|0.10786|NA|0.37437	2.3575	1.09457	46.4293
P46776	14	RPL27A	RL27A_HUMAN 60S ribosomal protein L27a OS=Homo sapiens OX=9606 GN=RPL27A PE=1 SV=2	2.235		2.23	2.6	0.70004||0.69721|0.58398	2.355	0.21219	9.01019
P61513	34	RPL37A	RL37A_HUMAN 60S ribosomal protein L37a OS=Homo sapiens OX=9606 GN=RPL37A PE=1 SV=2	2.74	2.26	2.48	1.94	0.08|0.0|0.88917|0.2226	2.355	0.33917	14.4021
P12277	7	CKB	KCRB_HUMAN Creatine kinase B-type OS=Homo sapiens OX=9606 GN=CKB PE=1 SV=1		2.92		1.79	|NA||NA	2.355	0.79903	33.9291
P14618	391	PKM	KPYM_HUMAN Pyruvate kinase PKM OS=Homo sapiens OX=9606 GN=PKM PE=1 SV=4	2.825	2.35	2.15	2.09	0.54945|0.44591|0.7725|0.21742	2.35375	0.33325	14.1583
P49915	392	GMPS	GUAA_HUMAN GMP synthase [glutamine-hydrolyzing] OS=Homo sapiens OX=9606 GN=GMPS PE=1 SV=1	2.68	2.36	2.055	2.31	NA|NA|0.02121|0.5577	2.35125	0.25666	10.9159
P35580	560	MYH10	MYH10_HUMAN Myosin-10 OS=Homo sapiens OX=9606 GN=MYH10 PE=1 SV=3	2.23	2.47			0.38184|0.0||	2.35	0.16971	7.2217
P25205	548	MCM3	MCM3_HUMAN DNA replication licensing factor MCM3 OS=Homo sapiens OX=9606 GN=MCM3 PE=1 SV=3		2.35			|NA||	2.35	NA	#VALUE!
Q13057	416	COASY	COASY_HUMAN Bifunctional coenzyme A synthase OS=Homo sapiens OX=9606 GN=COASY PE=1 SV=4		2.35			|NA||	2.35	NA	#VALUE!
Q9NYY8	287	FASTKD2	FAKD2_HUMAN FAST kinase domain-containing protein 2, mitochondrial OS=Homo sapiens OX=9606 GN=FASTKD2 PE=1 SV=1				2.35	|||NA	2.35	NA	#VALUE!
P62701	209	RPS4X	RS4X_HUMAN 40S ribosomal protein S4, X isoform OS=Homo sapiens OX=9606 GN=RPS4X PE=1 SV=2	1.55	3.565	2.26	2.02	NA|0.24254|0.2894|0.43238	2.34875	0.86279	36.734
Q13595	214	TRA2A	TRA2A_HUMAN Transformer-2 protein homolog alpha OS=Homo sapiens OX=9606 GN=TRA2A PE=1 SV=1	2.755	1.84		2.45	0.23335|0.67882||0.18475	2.34833	0.4659	19.8396
P00558	170	PGK1	PGK1_HUMAN Phosphoglycerate kinase 1 OS=Homo sapiens OX=9606 GN=PGK1 PE=1 SV=3	2.8	3.055	1.71	1.82	0.39869|0.86109|0.25536|0.2786	2.34625	0.68068	29.0114
P78417	49	GSTO1	GSTO1_HUMAN Glutathione S-transferase omega-1 OS=Homo sapiens OX=9606 GN=GSTO1 PE=1 SV=2		2.82	1.87		|NA|0.40992|	2.345	0.67175	28.6461
P10606	129	COX5B	COX5B_HUMAN Cytochrome c oxidase subunit 5B, mitochondrial OS=Homo sapiens OX=9606 GN=COX5B PE=1 SV=2	2.53	2.58	2.475	1.79	1.20208|0.73214|0.41971|0.45664	2.34375	0.37165	15.8571
P08243	423	ASNS	ASNS_HUMAN Asparagine synthetase [glutamine-hydrolyzing] OS=Homo sapiens OX=9606 GN=ASNS PE=1 SV=4	2.75	2.58	2.18	1.86	0.5637|0.60185|0.43974|0.51712	2.3425	0.4007	17.1057
Q12931	88	TRAP1	TRAP1_HUMAN Heat shock protein 75 kDa, mitochondrial OS=Homo sapiens OX=9606 GN=TRAP1 PE=1 SV=3	3.2	2.85	1.92	1.395	NA|NA|0.35355|0.10607	2.34125	0.83049	35.4721
Q15003	173	NCAPH	CND2_HUMAN Condensin complex subunit 2 OS=Homo sapiens OX=9606 GN=NCAPH PE=1 SV=3	2.34				NA|||	2.34	NA	#VALUE!
O15397	1000	IPO8	IPO8_HUMAN Importin-8 OS=Homo sapiens OX=9606 GN=IPO8 PE=1 SV=2	2.34				NA|||	2.34	NA	#VALUE!
Q92616	566	GCN1	GCN1_HUMAN eIF-2-alpha kinase activator GCN1 OS=Homo sapiens OX=9606 GN=GCN1 PE=1 SV=6			2.34		||NA|	2.34	NA	#VALUE!
Q12906	456	ILF3	ILF3_HUMAN Interleukin enhancer-binding factor 3 OS=Homo sapiens OX=9606 GN=ILF3 PE=1 SV=3			2.34		||NA|	2.34	NA	#VALUE!
P61088	36	UBE2N	UBE2N_HUMAN Ubiquitin-conjugating enzyme E2 N OS=Homo sapiens OX=9606 GN=UBE2N PE=1 SV=1			2.34		||NA|	2.34	NA	#VALUE!
P18621	93	RPL17	RL17_HUMAN 60S ribosomal protein L17 OS=Homo sapiens OX=9606 GN=RPL17 PE=1 SV=3	3.7	2.1	1.58	1.965	0.71591|0.35355|0.24705|0.26163	2.33625	0.93548	40.0419
O94992	346	HEXIM1	HEXI1_HUMAN Protein HEXIM1 OS=Homo sapiens OX=9606 GN=HEXIM1 PE=1 SV=1		3.68	1.62	1.7	|NA|NA|0.41138	2.33333	1.16693	50.0114
P49327	2440	FASN	FAS_HUMAN Fatty acid synthase OS=Homo sapiens OX=9606 GN=FASN PE=1 SV=3		2.5	2.16		|NA|NA|	2.33	0.24042	10.3185
O94979	1171	SEC31A	SC31A_HUMAN Protein transport protein Sec31A OS=Homo sapiens OX=9606 GN=SEC31A PE=1 SV=3		2.72	1.61	2.66	|0.01732|NA|0.01414	2.33	0.62426	26.7923
Q8WVC6	37	DCAKD	DCAKD_HUMAN Dephospho-CoA kinase domain-containing protein OS=Homo sapiens OX=9606 GN=DCAKD PE=1 SV=1				2.33	|||NA	2.33	NA	#VALUE!
P55265	988	ADAR	DSRAD_HUMAN Double-stranded RNA-specific adenosine deaminase OS=Homo sapiens OX=9606 GN=ADAR PE=1 SV=4	2.84	2.68	2	1.785	0.69515|0.24042|0.35796|0.4879	2.32625	0.51266	22.038
P13804	81	ETFA	ETFA_HUMAN Electron transfer flavoprotein subunit alpha, mitochondrial OS=Homo sapiens OX=9606 GN=ETFA PE=1 SV=1	2.79			1.86	NA|||0.11547	2.325	0.65761	28.2843
O60716	419	CTNND1	CTND1_HUMAN Catenin delta-1 OS=Homo sapiens OX=9606 GN=CTNND1 PE=1 SV=1		2.77		1.88	|NA||0.3677	2.325	0.62933	27.068
P38919	158	EIF4A3	IF4A3_HUMAN Eukaryotic initiation factor 4A-III OS=Homo sapiens OX=9606 GN=EIF4A3 PE=1 SV=4	2.98	2.84	1.5	1.97	0.7811|0.39937|0.58369|0.40011	2.3225	0.70731	30.4547
P78527	2642	PRKDC	PRKDC_HUMAN DNA-dependent protein kinase catalytic subunit OS=Homo sapiens OX=9606 GN=PRKDC PE=1 SV=3		2.05		2.59	|0.94752||0.86025	2.32	0.38184	16.4586
O00764	265	PDXK	PDXK_HUMAN Pyridoxal kinase OS=Homo sapiens OX=9606 GN=PDXK PE=1 SV=1				2.32	|||NA	2.32	NA	#VALUE!
P16152	60	CBR1	CBR1_HUMAN Carbonyl reductase [NADPH] 1 OS=Homo sapiens OX=9606 GN=CBR1 PE=1 SV=3	3.04	2.66	2.045	1.52	0.50817|0.67239|0.00707|0.24583	2.31625	0.67071	28.9567
P51991	177	HNRNPA3	ROA3_HUMAN Heterogeneous nuclear ribonucleoprotein A3 OS=Homo sapiens OX=9606 GN=HNRNPA3 PE=1 SV=2	3.24	2.415	2.02	1.59	0.16921|0.41719|0.30436|0.32332	2.31625	0.70197	30.3063
P42704	122	LRPPRC	LPPRC_HUMAN Leucine-rich PPR motif-containing protein, mitochondrial OS=Homo sapiens OX=9606 GN=LRPPRC PE=1 SV=3	2.92		1.71		NA||NA|	2.315	0.8556	36.959
Q9UQ80	193	PA2G4	PA2G4_HUMAN Proliferation-associated protein 2G4 OS=Homo sapiens OX=9606 GN=PA2G4 PE=1 SV=3		2.75	1.88		|0.0611|0.79072|	2.315	0.61518	26.5737
P00367	481	GLUD1	DHE3_HUMAN Glutamate dehydrogenase 1, mitochondrial OS=Homo sapiens OX=9606 GN=GLUD1 PE=1 SV=2	2.04	3.77	1.165	2.27	NA|NA|0.29721|NA	2.31125	1.08276	46.8474
P14618	274	PKM	KPYM_HUMAN Pyruvate kinase PKM OS=Homo sapiens OX=9606 GN=PKM PE=1 SV=4	3.06		2.92	0.95	0.28006||NA|0.53543	2.31	1.17987	51.0766
Q9Y5B9	851	SUPT16H	SP16H_HUMAN FACT complex subunit SPT16 OS=Homo sapiens OX=9606 GN=SUPT16H PE=1 SV=1	2.31				NA|||	2.31	NA	#VALUE!
P04075	81	ALDOA	ALDOA_HUMAN Fructose-bisphosphate aldolase A OS=Homo sapiens OX=9606 GN=ALDOA PE=1 SV=2	2.31				NA|||	2.31	NA	#VALUE!
Q14739	102	LBR	LBR_HUMAN Delta(14)-sterol reductase LBR OS=Homo sapiens OX=9606 GN=LBR PE=1 SV=2		2.31			|NA||	2.31	NA	#VALUE!
O75369	560	FLNB	FLNB_HUMAN Filamin-B OS=Homo sapiens OX=9606 GN=FLNB PE=1 SV=2		2.31			|NA||	2.31	NA	#VALUE!
Q14980	1101	NUMA1	NUMA1_HUMAN Nuclear mitotic apparatus protein 1 OS=Homo sapiens OX=9606 GN=NUMA1 PE=1 SV=2			2.31		||NA|	2.31	NA	#VALUE!
P82673	113	MRPS35	RT35_HUMAN 28S ribosomal protein S35, mitochondrial OS=Homo sapiens OX=9606 GN=MRPS35 PE=1 SV=1				2.31	|||NA	2.31	NA	#VALUE!
P49736	683	MCM2	MCM2_HUMAN DNA replication licensing factor MCM2 OS=Homo sapiens OX=9606 GN=MCM2 PE=1 SV=4	3.38	1.22	1.52	3.11	NA|NA|0.70711|NA	2.3075	1.095	47.454
P26599	436	PTBP1	PTBP1_HUMAN Polypyrimidine tract-binding protein 1 OS=Homo sapiens OX=9606 GN=PTBP1 PE=1 SV=1	1.635	3.39	2.02	2.17	0.74246|0.68705|0.96095|0.31896	2.30375	0.75841	32.9207
Q9BS26	310	ERP44	ERP44_HUMAN Endoplasmic reticulum resident protein 44 OS=Homo sapiens OX=9606 GN=ERP44 PE=1 SV=1	2.03	3.36		1.52	NA|NA||0.11314	2.30333	0.94996	41.2429
Q16204	283	CCDC6	CCDC6_HUMAN Coiled-coil domain-containing protein 6 OS=Homo sapiens OX=9606 GN=CCDC6 PE=1 SV=2		2.97	1.74	2.2	|NA|NA|NA	2.30333	0.62148	26.9818
P11586	466	MTHFD1	C1TC_HUMAN C-1-tetrahydrofolate synthase, cytoplasmic OS=Homo sapiens OX=9606 GN=MTHFD1 PE=1 SV=3	3.425	1.18			0.09192|NA||	2.3025	1.58745	68.9446
P49411	68	TUFM	EFTU_HUMAN Elongation factor Tu, mitochondrial OS=Homo sapiens OX=9606 GN=TUFM PE=1 SV=2	2.27	2.33			NA|NA||	2.3	0.04243	1.84478
Q14690	1745	PDCD11	RRP5_HUMAN Protein RRP5 homolog OS=Homo sapiens OX=9606 GN=PDCD11 PE=1 SV=3	2.11			2.48	NA|||NA	2.295	0.26163	11.4
P62273	10	RPS29	RS29_HUMAN 40S ribosomal protein S29 OS=Homo sapiens OX=9606 GN=RPS29 PE=1 SV=2	2.33	2.035	1.035	3.78	NA|0.02121|0.41719|NA	2.295	1.13456	49.4362
P35244	107	RPA3	RFA3_HUMAN Replication protein A 14 kDa subunit OS=Homo sapiens OX=9606 GN=RPA3 PE=1 SV=1	2.97	1.595		2.32	NA|0.34648||0.12728	2.295	0.68784	29.9712
P20700	269	LMNB1	LMNB1_HUMAN Lamin-B1 OS=Homo sapiens OX=9606 GN=LMNB1 PE=1 SV=2		3.35	1.24		|NA|NA|	2.295	1.492	65.0109
Q99417	50	MYCBP	MYCBP_HUMAN c-Myc-binding protein OS=Homo sapiens OX=9606 GN=MYCBP PE=1 SV=3			1.42	3.165	||1.23896|1.67253	2.2925	1.2339	53.8233
P43243	499	MATR3	MATR3_HUMAN Matrin-3 OS=Homo sapiens OX=9606 GN=MATR3 PE=1 SV=2	2.83	2.525	1.805	2	NA|0.54447|0.41724|0.40919	2.29	0.47122	20.5773
P53985	292	SLC16A1	MOT1_HUMAN Monocarboxylate transporter 1 OS=Homo sapiens OX=9606 GN=SLC16A1 PE=1 SV=3		2.29			|0.88391||	2.29	NA	#VALUE!
Q6NUK1	337	SLC25A24	SCMC1_HUMAN Calcium-binding mitochondrial carrier protein SCaMC-1 OS=Homo sapiens OX=9606 GN=SLC25A24 PE=1 SV=2			2.29		||NA|	2.29	NA	#VALUE!
O95373	101	IPO7	IPO7_HUMAN Importin-7 OS=Homo sapiens OX=9606 GN=IPO7 PE=1 SV=1			2.29		||NA|	2.29	NA	#VALUE!
Q9Y285	274	FARSA	SYFA_HUMAN Phenylalanine--tRNA ligase alpha subunit OS=Homo sapiens OX=9606 GN=FARSA PE=1 SV=3	3.175	2.73	1.77	1.48	0.29548|0.69172|0.47497|0.55545	2.28875	0.79652	34.8015
P53007	152	SLC25A1	TXTP_HUMAN Tricarboxylate transport protein, mitochondrial OS=Homo sapiens OX=9606 GN=SLC25A1 PE=1 SV=2	2.67	2.645	1.54		NA|0.23335|0.60811|	2.285	0.64531	28.2411
Q15046	374	KARS1	SYK_HUMAN Lysine--tRNA ligase OS=Homo sapiens OX=9606 GN=KARS1 PE=1 SV=3		2.69	1.88		|NA|0.05657|	2.285	0.57276	25.0661
P08243	169	ASNS	ASNS_HUMAN Asparagine synthetase [glutamine-hydrolyzing] OS=Homo sapiens OX=9606 GN=ASNS PE=1 SV=4	2.67	3.44	2.34	0.68	NA|NA|NA|0.0	2.2825	1.16351	50.9752
P00558	173	PGK1	PGK1_HUMAN Phosphoglycerate kinase 1 OS=Homo sapiens OX=9606 GN=PGK1 PE=1 SV=3	2.2	2.14	2.65	2.13	0.08485|0.06928|0.38423|0.84049	2.28	0.2486	10.9035
P22087	251	FBL	FBRL_HUMAN rRNA 2'-O-methyltransferase fibrillarin OS=Homo sapiens OX=9606 GN=FBL PE=1 SV=2	2.265	2.085	2.69	2.08	1.54856|0.67175|0.76683|0.84121	2.28	0.28656	12.5684
Q96H79	29	ZC3HAV1L	ZCCHL_HUMAN Zinc finger CCCH-type antiviral protein 1-like OS=Homo sapiens OX=9606 GN=ZC3HAV1L PE=1 SV=2		2.28			|NA||	2.28	NA	#VALUE!
Q9Y3T9	387	NOC2L	NOC2L_HUMAN Nucleolar complex protein 2 homolog OS=Homo sapiens OX=9606 GN=NOC2L PE=1 SV=4		2.28			|NA||	2.28	NA	#VALUE!
P24928	995	POLR2A	RPB1_HUMAN DNA-directed RNA polymerase II subunit RPB1 OS=Homo sapiens OX=9606 GN=POLR2A PE=1 SV=2				2.28	|||NA	2.28	NA	#VALUE!
Q9NYK5	309	MRPL39	RM39_HUMAN 39S ribosomal protein L39, mitochondrial OS=Homo sapiens OX=9606 GN=MRPL39 PE=1 SV=3				2.28	|||NA	2.28	NA	#VALUE!
P84077	146	ARF1	ARF1_HUMAN ADP-ribosylation factor 1 OS=Homo sapiens OX=9606 GN=ARF1 PE=1 SV=2	2.07	2.335	2.15	2.56	0.95075|0.95196|0.53097|2.00778	2.27875	0.21788	9.56138
P78371	148	CCT2	TCPB_HUMAN T-complex protein 1 subunit beta OS=Homo sapiens OX=9606 GN=CCT2 PE=1 SV=4	2.625	2.985	1.785	1.71	0.98287|0.71418|0.24749|NA	2.27625	0.62873	27.6213
P54727	274	RAD23B	RD23B_HUMAN UV excision repair protein RAD23 homolog B OS=Homo sapiens OX=9606 GN=RAD23B PE=1 SV=1	3.075	3.28	1.31	1.43	0.07778|1.03238|0.04243|0.36373	2.27375	1.04806	46.0939
P61313	86	RPL15	RL15_HUMAN 60S ribosomal protein L15 OS=Homo sapiens OX=9606 GN=RPL15 PE=1 SV=2		2.33	2.45	2.04	|NA|0.78258|0.59437	2.27333	0.21079	9.2723
P50570	288	DNM2	DYN2_HUMAN Dynamin-2 OS=Homo sapiens OX=9606 GN=DNM2 PE=1 SV=2	2.27				NA|||	2.27	NA	#VALUE!
O00571	485	DDX3X	DDX3X_HUMAN ATP-dependent RNA helicase DDX3X OS=Homo sapiens OX=9606 GN=DDX3X PE=1 SV=3			2.27		||NA|	2.27	NA	#VALUE!
Q6NVY1	340	HIBCH	HIBCH_HUMAN 3-hydroxyisobutyryl-CoA hydrolase, mitochondrial OS=Homo sapiens OX=9606 GN=HIBCH PE=1 SV=2				2.27	|||NA	2.27	NA	#VALUE!
P05455	250	SSB	LA_HUMAN Lupus La protein OS=Homo sapiens OX=9606 GN=SSB PE=1 SV=2				2.27	|||NA	2.27	NA	#VALUE!
Q99729	217	HNRNPAB	ROAA_HUMAN Heterogeneous nuclear ribonucleoprotein A/B OS=Homo sapiens OX=9606 GN=HNRNPAB PE=1 SV=2	1.56	2.49	1.27	3.75	NA|1.21528|NA|0.61199	2.2675	1.11697	49.26
P62266	110	RPS23	RS23_HUMAN 40S ribosomal protein S23 OS=Homo sapiens OX=9606 GN=RPS23 PE=1 SV=3	3.06	2.67	1.63	1.71	0.43326|0.41048|0.3054|0.65907	2.2675	0.70882	31.26
P08670	462	VIM	VIME_HUMAN Vimentin OS=Homo sapiens OX=9606 GN=VIM PE=1 SV=4	3.77		1.73	1.3	NA||NA|NA	2.26667	1.31956	58.2158
P83881	90	RPL36A	RL36A_HUMAN 60S ribosomal protein L36a OS=Homo sapiens OX=9606 GN=RPL36A PE=1 SV=2	3.315		1.795	1.69	0.00707||0.56818|0.6755	2.26667	0.9094	40.1205
Q15102	166	PAFAH1B3	PA1B3_HUMAN Platelet-activating factor acetylhydrolase IB subunit alpha1 OS=Homo sapiens OX=9606 GN=PAFAH1B3 PE=1 SV=1		2.67	2.43	1.7	|1.00409|0.88625|NA	2.26667	0.50521	22.2886
Q15555	196	MAPRE2	MARE2_HUMAN Microtubule-associated protein RP/EB family member 2 OS=Homo sapiens OX=9606 GN=MAPRE2 PE=1 SV=1	1.03		3.5		0.0||NA|	2.265	1.74655	77.1104
P50990	21	CCT8	TCPQ_HUMAN T-complex protein 1 subunit theta OS=Homo sapiens OX=9606 GN=CCT8 PE=1 SV=4	2.82	2.65	1.88	1.71	1.10129|0.49856|0.37479|0.71613	2.265	0.55151	24.3492
P33991	638	MCM4	MCM4_HUMAN DNA replication licensing factor MCM4 OS=Homo sapiens OX=9606 GN=MCM4 PE=1 SV=5		3.26	2.05	1.48	|NA|0.07|0.14142	2.26333	0.90897	40.1607
P24752	400	ACAT1	THIL_HUMAN Acetyl-CoA acetyltransferase, mitochondrial OS=Homo sapiens OX=9606 GN=ACAT1 PE=1 SV=1	2.26				NA|||	2.26	NA	#VALUE!
P18858	523	LIG1	DNLI1_HUMAN DNA ligase 1 OS=Homo sapiens OX=9606 GN=LIG1 PE=1 SV=1	2.46	2.91	1.41		NA|NA|NA|	2.26	0.76974	34.0593
P08670	238	VIM	VIME_HUMAN Vimentin OS=Homo sapiens OX=9606 GN=VIM PE=1 SV=4			2.26		||NA|	2.26	NA	#VALUE!
Q99832	282	CCT7	TCPH_HUMAN T-complex protein 1 subunit eta OS=Homo sapiens OX=9606 GN=CCT7 PE=1 SV=2	2.61	2.73	2.035	1.66	0.69255|0.03464|0.63683|NA	2.25875	0.50134	22.1955
Q02086	401	SP2	SP2_HUMAN Transcription factor Sp2 OS=Homo sapiens OX=9606 GN=SP2 PE=1 SV=3	0.69	2.85	2.99	2.5	NA|NA|NA|NA	2.2575	1.06513	47.1818
P04406	53	GAPDH	G3P_HUMAN Glyceraldehyde-3-phosphate dehydrogenase OS=Homo sapiens OX=9606 GN=GAPDH PE=1 SV=3	2.79	2.47	2.325	1.44	NA|0.55154|1.0253|0.59629	2.25625	0.5778	25.6089
P06737	378	PYGL	PYGL_HUMAN Glycogen phosphorylase, liver form OS=Homo sapiens OX=9606 GN=PYGL PE=1 SV=4	2.92			1.59	NA|||NA	2.255	0.94045	41.7051
P12277	97	CKB	KCRB_HUMAN Creatine kinase B-type OS=Homo sapiens OX=9606 GN=CKB PE=1 SV=1	3.12	2.22	1.61	2.06	NA|0.71654|1.01823|0.1031	2.2525	0.63337	28.1185
P11586	777	MTHFD1	C1TC_HUMAN C-1-tetrahydrofolate synthase, cytoplasmic OS=Homo sapiens OX=9606 GN=MTHFD1 PE=1 SV=3	3.5	1.99	1.71	1.8	NA|NA|0.0|0.43044	2.25	0.84147	37.3987
Q9Y3B7	116	MRPL11	RM11_HUMAN 39S ribosomal protein L11, mitochondrial OS=Homo sapiens OX=9606 GN=MRPL11 PE=1 SV=1	2.25				NA|||	2.25	NA	#VALUE!
P04181	56	OAT	OAT_HUMAN Ornithine aminotransferase, mitochondrial OS=Homo sapiens OX=9606 GN=OAT PE=1 SV=1	2.64	2.12	1.99		NA|NA|NA|	2.25	0.34395	15.2867
P54920	251	NAPA	SNAA_HUMAN Alpha-soluble NSF attachment protein OS=Homo sapiens OX=9606 GN=NAPA PE=1 SV=3		2.25			|NA||	2.25	NA	#VALUE!
Q99832	283	CCT7	TCPH_HUMAN T-complex protein 1 subunit eta OS=Homo sapiens OX=9606 GN=CCT7 PE=1 SV=2			2.25	2.25	||NA|0.05657	2.25	0	0
Q00341	81	HDLBP	VIGLN_HUMAN Vigilin OS=Homo sapiens OX=9606 GN=HDLBP PE=1 SV=2	3.35	1.09	2.36	2.19	NA|NA|NA|NA	2.2475	0.92579	41.192
P46778	139	RPL21	RL21_HUMAN 60S ribosomal protein L21 OS=Homo sapiens OX=9606 GN=RPL21 PE=1 SV=2	3.64		1.24	1.86	0.46669||NA|NA	2.24667	1.24585	55.4532
P61313	87	RPL15	RL15_HUMAN 60S ribosomal protein L15 OS=Homo sapiens OX=9606 GN=RPL15 PE=1 SV=2	2.335	2.025	1.645	2.98	0.2192|0.02121|0.89803|NA	2.24625	0.56472	25.1406
Q8WUM4	279	PDCD6IP	PDC6I_HUMAN Programmed cell death 6-interacting protein OS=Homo sapiens OX=9606 GN=PDCD6IP PE=1 SV=1		2.78	1.65	2.3	|NA|NA|NA	2.24333	0.56713	25.2807
P15880	272	RPS2	RS2_HUMAN 40S ribosomal protein S2 OS=Homo sapiens OX=9606 GN=RPS2 PE=1 SV=2	2.94	2.76	1.435	1.835	1.1358|0.39342|0.50394|0.36044	2.2425	0.72398	32.2845
Q9NTJ3	216	SMC4	SMC4_HUMAN Structural maintenance of chromosomes protein 4 OS=Homo sapiens OX=9606 GN=SMC4 PE=1 SV=2	2.45			2.03	NA|||0.0	2.24	0.29698	13.258
P49591	140	SARS1	SYSC_HUMAN Serine--tRNA ligase, cytoplasmic OS=Homo sapiens OX=9606 GN=SARS1 PE=1 SV=3	2.24				NA|||	2.24	NA	#VALUE!
P00367	266	GLUD1	DHE3_HUMAN Glutamate dehydrogenase 1, mitochondrial OS=Homo sapiens OX=9606 GN=GLUD1 PE=1 SV=2		2.24			|0.0||	2.24	NA	#VALUE!
P06280	115	GLA	AGAL_HUMAN Alpha-galactosidase A OS=Homo sapiens OX=9606 GN=GLA PE=1 SV=1		2.24			|NA||	2.24	NA	#VALUE!
Q14166	436	TTLL12	TTL12_HUMAN Tubulin--tyrosine ligase-like protein 12 OS=Homo sapiens OX=9606 GN=TTLL12 PE=1 SV=2		1.5	2.98		|NA|NA|	2.24	1.04652	46.7196
P60174	101	TPI1	TPIS_HUMAN Triosephosphate isomerase OS=Homo sapiens OX=9606 GN=TPI1 PE=1 SV=4		2.81	1.67		|NA|0.73539|	2.24	0.8061	35.9866
Q86VP6	1073	CAND1	CAND1_HUMAN Cullin-associated NEDD8-dissociated protein 1 OS=Homo sapiens OX=9606 GN=CAND1 PE=1 SV=2	2.77	3.23	1.395	1.55	NA|1.33217|0.60191|0.38249	2.23625	0.90389	40.4199
Q15233	106	NONO	NONO_HUMAN Non-POU domain-containing octamer-binding protein OS=Homo sapiens OX=9606 GN=NONO PE=1 SV=4	1.56	3.23	1.89	2.26	1.31754|1.06855|0.13777|0.01528	2.235	0.72233	32.319
Q15046	100	KARS1	SYK_HUMAN Lysine--tRNA ligase OS=Homo sapiens OX=9606 GN=KARS1 PE=1 SV=3	1.46	2.42	2.59	2.47	0.04243|NA|0.35679|1.00373	2.235	0.52157	23.3365
Q14166	35	TTLL12	TTL12_HUMAN Tubulin--tyrosine ligase-like protein 12 OS=Homo sapiens OX=9606 GN=TTLL12 PE=1 SV=2		2.38	2.09		|NA|0.83138|	2.235	0.20506	9.17494
Q6P2Q9	509	PRPF8	PRP8_HUMAN Pre-mRNA-processing-splicing factor 8 OS=Homo sapiens OX=9606 GN=PRPF8 PE=1 SV=2			2.81	1.66	||0.0|0.35796	2.235	0.81317	36.3834
O75643	1862	SNRNP200	U520_HUMAN U5 small nuclear ribonucleoprotein 200 kDa helicase OS=Homo sapiens OX=9606 GN=SNRNP200 PE=1 SV=2	1.26	2.73	2.705		0.01414|0.39598|1.393|	2.23167	0.84158	37.7108
Q99880	110	H2BC13	H2B1L_HUMAN Histone H2B type 1-L OS=Homo sapiens OX=9606 GN=H2BC13 PE=1 SV=3				2.23	|||0.14469	2.23	NA	#VALUE!
Q8N257	110	H2BU1	H2B3B_HUMAN Histone H2B type 3-B OS=Homo sapiens OX=9606 GN=H2BU1 PE=1 SV=3				2.23	|||0.14469	2.23	NA	#VALUE!
Q53GS9	520	USP39	SNUT2_HUMAN U4/U6.U5 tri-snRNP-associated protein 2 OS=Homo sapiens OX=9606 GN=USP39 PE=1 SV=2				2.23	|||NA	2.23	NA	#VALUE!
P27708	111	CAD	PYR1_HUMAN CAD protein OS=Homo sapiens OX=9606 GN=CAD PE=1 SV=3				2.23	|||NA	2.23	NA	#VALUE!
P17987	471	TCP1	TCPA_HUMAN T-complex protein 1 subunit alpha OS=Homo sapiens OX=9606 GN=TCP1 PE=1 SV=1	2.735	2.67	1.73	1.78	0.66297|0.62131|0.59408|0.47647	2.22875	0.54806	24.5905
P46777	175	RPL5	RL5_HUMAN 60S ribosomal protein L5 OS=Homo sapiens OX=9606 GN=RPL5 PE=1 SV=3	2.65	2.54	1.83	1.89	0.47823|1.1877|0.72865|0.31436	2.2275	0.42742	19.1883
Q92804	158	TAF15	RBP56_HUMAN TATA-binding protein-associated factor 2N OS=Homo sapiens OX=9606 GN=TAF15 PE=1 SV=1	1.19	1.39	4.1		0.0|NA|0.22627|	2.22667	1.62543	72.9982
Q02878	211	RPL6	RL6_HUMAN 60S ribosomal protein L6 OS=Homo sapiens OX=9606 GN=RPL6 PE=1 SV=3				2.225	|||2.15668	2.225	NA	#VALUE!
P43243	204	MATR3	MATR3_HUMAN Matrin-3 OS=Homo sapiens OX=9606 GN=MATR3 PE=1 SV=2	3.005		1.725	1.94	0.98134||0.47679|0.67897	2.22333	0.68543	30.829
Q9NZI8	284	IGF2BP1	IF2B1_HUMAN Insulin-like growth factor 2 mRNA-binding protein 1 OS=Homo sapiens OX=9606 GN=IGF2BP1 PE=1 SV=2	2.4	2.46	1.96	2.07	0.41509|0.40136|0.33068|0.0	2.2225	0.245	11.0236
Q93008	450	USP9X	USP9X_HUMAN Probable ubiquitin carboxyl-terminal hydrolase FAF-X OS=Homo sapiens OX=9606 GN=USP9X PE=1 SV=4	3.33		1.11		NA||NA|	2.22	1.56978	70.7108
Q99460	604	PSMD1	PSMD1_HUMAN 26S proteasome non-ATPase regulatory subunit 1 OS=Homo sapiens OX=9606 GN=PSMD1 PE=1 SV=2		2.22			|NA||	2.22	NA	#VALUE!
P04844	268	RPN2	RPN2_HUMAN Dolichyl-diphosphooligosaccharide--protein glycosyltransferase subunit 2 OS=Homo sapiens OX=9606 GN=RPN2 PE=1 SV=3		2.22			|NA||	2.22	NA	#VALUE!
Q13283	127	G3BP1	G3BP1_HUMAN Ras GTPase-activating protein-binding protein 1 OS=Homo sapiens OX=9606 GN=G3BP1 PE=1 SV=1		2.22			|NA||	2.22	NA	#VALUE!
P39656	415	DDOST	OST48_HUMAN Dolichyl-diphosphooligosaccharide--protein glycosyltransferase 48 kDa subunit OS=Homo sapiens OX=9606 GN=DDOST PE=1 SV=4				2.22	|||NA	2.22	NA	#VALUE!
Q15181	226	PPA1	IPYR_HUMAN Inorganic pyrophosphatase OS=Homo sapiens OX=9606 GN=PPA1 PE=1 SV=2		2.62		1.815	|NA||0.02121	2.2175	0.56922	25.6694
Q13263	240	TRIM28	TIF1B_HUMAN Transcription intermediary factor 1-beta OS=Homo sapiens OX=9606 GN=TRIM28 PE=1 SV=5	2.5	3.06	1.51	1.795	0.72988|0.96884|0.25246|0.35785	2.21625	0.69968	31.5704
P24539	222	ATP5PB	AT5F1_HUMAN ATP synthase F(0) complex subunit B1, mitochondrial OS=Homo sapiens OX=9606 GN=ATP5PB PE=1 SV=2	2.5	3.12	1.315	1.925	NA|0.53538|0.14849|0.51619	2.215	0.77338	34.9156
O75643	1526	SNRNP200	U520_HUMAN U5 small nuclear ribonucleoprotein 200 kDa helicase OS=Homo sapiens OX=9606 GN=SNRNP200 PE=1 SV=2	2.06	2.785		1.8	NA|0.71418||NA	2.215	0.51047	23.046
P63261	173	ACTG1	ACTG_HUMAN Actin, cytoplasmic 2 OS=Homo sapiens OX=9606 GN=ACTG1 PE=1 SV=1	2.41	2.41	1.43	2.61	0.28897|0.59414|0.58905|0.57632	2.215	0.53176	24.0072
P49915	391	GMPS	GUAA_HUMAN GMP synthase [glutamine-hydrolyzing] OS=Homo sapiens OX=9606 GN=GMPS PE=1 SV=1	2.785	2.06	1.81	2.19	0.51619|0.8356|NA|0.85715	2.21125	0.41373	18.7102
P39748	193	FEN1	FEN1_HUMAN Flap endonuclease 1 OS=Homo sapiens OX=9606 GN=FEN1 PE=1 SV=1	3.1	2.76	1.58	1.405	NA|NA|NA|0.61518	2.21125	0.8445	38.1911
O75533	260	SF3B1	SF3B1_HUMAN Splicing factor 3B subunit 1 OS=Homo sapiens OX=9606 GN=SF3B1 PE=1 SV=3		2.67	1.47	2.49	|NA|NA|NA	2.21	0.64715	29.2828
P52306	369	RAP1GDS1	GDS1_HUMAN Rap1 GTPase-GDP dissociation stimulator 1 OS=Homo sapiens OX=9606 GN=RAP1GDS1 PE=1 SV=3		2.21			|NA||	2.21	NA	#VALUE!
P56545	298	CTBP2	CTBP2_HUMAN C-terminal-binding protein 2 OS=Homo sapiens OX=9606 GN=CTBP2 PE=1 SV=1		3.32		1.1	|0.0||NA	2.21	1.56978	71.0308
P51665	196	PSMD7	PSMD7_HUMAN 26S proteasome non-ATPase regulatory subunit 7 OS=Homo sapiens OX=9606 GN=PSMD7 PE=1 SV=2			2.21		||NA|	2.21	NA	#VALUE!
O75367	266	MACROH2A1	H2AY_HUMAN Core histone macro-H2A.1 OS=Homo sapiens OX=9606 GN=MACROH2A1 PE=1 SV=4				2.21	|||NA	2.21	NA	#VALUE!
P62273	3	RPS29	RS29_HUMAN 40S ribosomal protein S29 OS=Homo sapiens OX=9606 GN=RPS29 PE=1 SV=2	1.93	1.04	3.87	1.99	0.5374|NA|NA|0.37554	2.2075	1.19042	53.9262
P60842	153	EIF4A1	IF4A1_HUMAN Eukaryotic initiation factor 4A-I OS=Homo sapiens OX=9606 GN=EIF4A1 PE=1 SV=1	3.16	2	1.87	1.79	0.56048|1.0652|0.42086|0.71252	2.205	0.64252	29.1392
P17812	553	CTPS1	PYRG1_HUMAN CTP synthase 1 OS=Homo sapiens OX=9606 GN=CTPS1 PE=1 SV=2				2.205	|||1.33643	2.205	NA	#VALUE!
O43324	85	EEF1E1	MCA3_HUMAN Eukaryotic translation elongation factor 1 epsilon-1 OS=Homo sapiens OX=9606 GN=EEF1E1 PE=1 SV=1	2.85		1.88	1.88	NA||NA|NA	2.20333	0.56003	25.4174
P35232	55	PHB	PHB_HUMAN Prohibitin OS=Homo sapiens OX=9606 GN=PHB PE=1 SV=1	1.88	2.52			NA|NA||	2.2	0.45255	20.5705
P39656	314	DDOST	OST48_HUMAN Dolichyl-diphosphooligosaccharide--protein glycosyltransferase 48 kDa subunit OS=Homo sapiens OX=9606 GN=DDOST PE=1 SV=4	2.48			1.92	NA|||NA	2.2	0.39598	17.9991
O94906	48	PRPF6	PRP6_HUMAN Pre-mRNA-processing factor 6 OS=Homo sapiens OX=9606 GN=PRPF6 PE=1 SV=1	2.2				NA|||	2.2	NA	#VALUE!
O75153	349	CLUH	CLU_HUMAN Clustered mitochondria protein homolog OS=Homo sapiens OX=9606 GN=CLUH PE=1 SV=2	2.2				NA|||	2.2	NA	#VALUE!
P55072	226	VCP	TERA_HUMAN Transitional endoplasmic reticulum ATPase OS=Homo sapiens OX=9606 GN=VCP PE=1 SV=4				2.2	|||NA	2.2	NA	#VALUE!
Q8IYD1	343	GSPT2	ERF3B_HUMAN Eukaryotic peptide chain release factor GTP-binding subunit ERF3B OS=Homo sapiens OX=9606 GN=GSPT2 PE=1 SV=2	1.355		2.43	2.81	0.86974||NA|0.275	2.19833	0.75466	34.3288
P15170	214	GSPT1	ERF3A_HUMAN Eukaryotic peptide chain release factor GTP-binding subunit ERF3A OS=Homo sapiens OX=9606 GN=GSPT1 PE=1 SV=1	1.355		2.43	2.81	0.86974||NA|0.275	2.19833	0.75466	34.3288
Q86VP6	996	CAND1	CAND1_HUMAN Cullin-associated NEDD8-dissociated protein 1 OS=Homo sapiens OX=9606 GN=CAND1 PE=1 SV=2	2.85	2.49	1.64	1.81	0.22627|0.0|NA|NA	2.1975	0.56929	25.9063
P49321	545	NASP	NASP_HUMAN Nuclear autoantigenic sperm protein OS=Homo sapiens OX=9606 GN=NASP PE=1 SV=2	2.725	2.67	1.58	1.81	0.40305|NA|0.64796|0.39703	2.19625	0.58679	26.7178
P49915	436	GMPS	GUAA_HUMAN GMP synthase [glutamine-hydrolyzing] OS=Homo sapiens OX=9606 GN=GMPS PE=1 SV=1	2.285	3.13	1.73	1.64	0.39475|0.89173|0.56095|1.01268	2.19625	0.68473	31.1772
Q9NR30	593	DDX21	DDX21_HUMAN Nucleolar RNA helicase 2 OS=Homo sapiens OX=9606 GN=DDX21 PE=1 SV=5	2.29	2.65	1.94	1.9	NA|NA|0.21213|0.51824	2.195	0.35029	15.9585
Q93008	1371	USP9X	USP9X_HUMAN Probable ubiquitin carboxyl-terminal hydrolase FAF-X OS=Homo sapiens OX=9606 GN=USP9X PE=1 SV=4	0.87	3.02	2.69		NA|NA|0.0|	2.19333	1.15786	52.79
P62333	316	PSMC6	PRS10_HUMAN 26S proteasome regulatory subunit 10B OS=Homo sapiens OX=9606 GN=PSMC6 PE=1 SV=1	1.34		2.445	2.79	NA||0.00707|NA	2.19167	0.75747	34.5613
Q9NWW5	9	CLN6	CLN6_HUMAN Ceroid-lipofuscinosis neuronal protein 6 OS=Homo sapiens OX=9606 GN=CLN6 PE=1 SV=1	2.19				NA|||	2.19	NA	#VALUE!
Q8WW12	174	PCNP	PCNP_HUMAN PEST proteolytic signal-containing nuclear protein OS=Homo sapiens OX=9606 GN=PCNP PE=1 SV=2			2.67	1.71	||NA|0.0	2.19	0.67882	30.9963
Q99986	171	VRK1	VRK1_HUMAN Serine/threonine-protein kinase VRK1 OS=Homo sapiens OX=9606 GN=VRK1 PE=1 SV=1			2.19		||NA|	2.19	NA	#VALUE!
Q92616	705	GCN1	GCN1_HUMAN eIF-2-alpha kinase activator GCN1 OS=Homo sapiens OX=9606 GN=GCN1 PE=1 SV=6				2.19	|||NA	2.19	NA	#VALUE!
P56192	123	MARS1	SYMC_HUMAN Methionine--tRNA ligase, cytoplasmic OS=Homo sapiens OX=9606 GN=MARS1 PE=1 SV=2	3.28	1.93	1.865	1.68	0.42501|1.35397|0.24749|0.60754	2.18875	0.73517	33.5886
P49736	287	MCM2	MCM2_HUMAN DNA replication licensing factor MCM2 OS=Homo sapiens OX=9606 GN=MCM2 PE=1 SV=4	2.2	2.43	2.34	1.78	1.46885|0.94752|0.29918|0.35092	2.1875	0.28768	13.1511
Q15393	1160	SF3B3	SF3B3_HUMAN Splicing factor 3B subunit 3 OS=Homo sapiens OX=9606 GN=SF3B3 PE=1 SV=4	2.69	1.935	1.935		0.12728|1.42128|0.95459|	2.18667	0.4359	19.9344
P22392	47	NME2	NDKB_HUMAN Nucleoside diphosphate kinase B OS=Homo sapiens OX=9606 GN=NME2 PE=1 SV=1	3.545	2.3	1.495	1.4	0.36465|1.31522|0.19092|0.22502	2.185	0.9925	45.4233
Q9Y383	63	LUC7L2	LC7L2_HUMAN Putative RNA-binding protein Luc7-like 2 OS=Homo sapiens OX=9606 GN=LUC7L2 PE=1 SV=2	2.515	2.48	2.25	1.495	0.80528|NA|0.85213|0.99629	2.185	0.47478	21.7291
Q5JTV8	566	TOR1AIP1	TOIP1_HUMAN Torsin-1A-interacting protein 1 OS=Homo sapiens OX=9606 GN=TOR1AIP1 PE=1 SV=2	1.99		2.62	1.945	0.0||NA|0.40651	2.185	0.37739	17.2719
Q6ZN08	503	ZNF66	ZNF66_HUMAN Putative zinc finger protein 66 OS=Homo sapiens OX=9606 GN=ZNF66 PE=5 SV=3		2.185			|1.68999||	2.185	NA	#VALUE!
P68133	42	ACTA1	ACTS_HUMAN Actin, alpha skeletal muscle OS=Homo sapiens OX=9606 GN=ACTA1 PE=1 SV=1	2.53	1.88	2.42	1.9	0.62613|1.38593|0.14107|0.28688	2.1825	0.34082	15.616
P63261	40	ACTG1	ACTG_HUMAN Actin, cytoplasmic 2 OS=Homo sapiens OX=9606 GN=ACTG1 PE=1 SV=1	2.53	1.88	2.42	1.9	0.62613|1.38593|0.14107|0.28688	2.1825	0.34082	15.616
P31942	224	HNRNPH3	HNRH3_HUMAN Heterogeneous nuclear ribonucleoprotein H3 OS=Homo sapiens OX=9606 GN=HNRNPH3 PE=1 SV=2	2.95	2.67	1.885	1.225	0.33941|0.27839|0.0495|0.46328	2.1825	0.78146	35.8057
P27635	92	RPL10	RL10_HUMAN 60S ribosomal protein L10 OS=Homo sapiens OX=9606 GN=RPL10 PE=1 SV=4	2.84	2.05	1.7	2.13	0.31113|NA|NA|0.50229	2.18	0.47798	21.9257
Q8IYB5	17	SMAP1	SMAP1_HUMAN Stromal membrane-associated protein 1 OS=Homo sapiens OX=9606 GN=SMAP1 PE=1 SV=2		2.18			|NA||	2.18	NA	#VALUE!
P14923	541	JUP	PLAK_HUMAN Junction plakoglobin OS=Homo sapiens OX=9606 GN=JUP PE=1 SV=3				2.18	|||NA	2.18	NA	#VALUE!
P26641	39	EEF1G	EF1G_HUMAN Elongation factor 1-gamma OS=Homo sapiens OX=9606 GN=EEF1G PE=1 SV=3	2.62	2.4	1.79	1.9	0.49516|0.8103|0.40219|0.31822	2.1775	0.39685	18.225
P49327	804	FASN	FAS_HUMAN Fatty acid synthase OS=Homo sapiens OX=9606 GN=FASN PE=1 SV=3	2.9	1.955		1.67	NA|0.51672||0.74953	2.175	0.64384	29.6018
Q15102	209	PAFAH1B3	PA1B3_HUMAN Platelet-activating factor acetylhydrolase IB subunit alpha1 OS=Homo sapiens OX=9606 GN=PAFAH1B3 PE=1 SV=1	1.56	3.26	1.87	2.01	NA|1.37231|0.66041|0.37864	2.175	0.74737	34.3618
P16104	39	H2AX	H2AX_HUMAN Histone H2AX OS=Homo sapiens OX=9606 GN=H2AX PE=1 SV=2	3.66		1.2	1.66	NA||NA|NA	2.17333	1.30787	60.1782
P25705	519	ATP5F1A	ATPA_HUMAN ATP synthase subunit alpha, mitochondrial OS=Homo sapiens OX=9606 GN=ATP5F1A PE=1 SV=1	2.4	2.23	1.985	2.07	0.75703|0.93338|0.45483|1.21344	2.17125	0.18323	8.43892
P50402	166	EMD	EMD_HUMAN Emerin OS=Homo sapiens OX=9606 GN=EMD PE=1 SV=1	2.435	1.73	2.17	2.345	0.40305|0.18385|NA|0.19092	2.17	0.31329	14.4373
P27708	853	CAD	PYR1_HUMAN CAD protein OS=Homo sapiens OX=9606 GN=CAD PE=1 SV=3		2.17			|NA||	2.17	NA	#VALUE!
Q00839	819	HNRNPU	HNRPU_HUMAN Heterogeneous nuclear ribonucleoprotein U OS=Homo sapiens OX=9606 GN=HNRNPU PE=1 SV=6		1.51	2.5	2.5	|NA|0.50464|0.14295	2.17	0.57158	26.3401
P13010	411	XRCC5	XRCC5_HUMAN X-ray repair cross-complementing protein 5 OS=Homo sapiens OX=9606 GN=XRCC5 PE=1 SV=3		2.45	1.97	2.09	|NA|NA|0.0	2.17	0.2498	11.5115
P14866	365	HNRNPL	HNRPL_HUMAN Heterogeneous nuclear ribonucleoprotein L OS=Homo sapiens OX=9606 GN=HNRNPL PE=1 SV=2			2.37	1.97	||NA|NA	2.17	0.28284	13.0341
Q8N8S7	39	ENAH	ENAH_HUMAN Protein enabled homolog OS=Homo sapiens OX=9606 GN=ENAH PE=1 SV=2				2.17	|||NA	2.17	NA	#VALUE!
P26640	979	VARS1	SYVC_HUMAN Valine--tRNA ligase OS=Homo sapiens OX=9606 GN=VARS1 PE=1 SV=4				2.17	|||NA	2.17	NA	#VALUE!
P62826	30	RAN	RAN_HUMAN GTP-binding nuclear protein Ran OS=Homo sapiens OX=9606 GN=RAN PE=1 SV=3		3.42	1.8	1.285	|NA|0.6015|0.78489	2.16833	1.11414	51.3824
P62701	138	RPS4X	RS4X_HUMAN 40S ribosomal protein S4, X isoform OS=Homo sapiens OX=9606 GN=RPS4X PE=1 SV=2	1.7	2.935	2.15	1.885	0.66635|0.8564|0.54231|0.17271	2.1675	0.54397	25.0967
Q6S8J3	788	POTEE	POTEE_HUMAN POTE ankyrin domain family member E OS=Homo sapiens OX=9606 GN=POTEE PE=2 SV=3		2.13	2.2		|0.36383|0.32155|	2.165	0.0495	2.28637
Q99426	90	TBCB	TBCB_HUMAN Tubulin-folding cofactor B OS=Homo sapiens OX=9606 GN=TBCB PE=1 SV=2	3.54	1.57	2.115	1.43	NA|NA|1.33643|0.45255	2.16375	0.96391	44.5481
P42771	98	CDKN2A	CDN2A_HUMAN Cyclin-dependent kinase inhibitor 2A OS=Homo sapiens OX=9606 GN=CDKN2A PE=1 SV=2	2.32	2.35	1.82		0.06928|NA|0.49863|	2.16333	0.29771	13.7617
Q8NE71	797	ABCF1	ABCF1_HUMAN ATP-binding cassette sub-family F member 1 OS=Homo sapiens OX=9606 GN=ABCF1 PE=1 SV=2	2.16				NA|||	2.16	NA	#VALUE!
P33991	415	MCM4	MCM4_HUMAN DNA replication licensing factor MCM4 OS=Homo sapiens OX=9606 GN=MCM4 PE=1 SV=5	2.36			1.96	NA|||NA	2.16	0.28284	13.0944
Q08211	514	DHX9	DHX9_HUMAN ATP-dependent RNA helicase A OS=Homo sapiens OX=9606 GN=DHX9 PE=1 SV=4	3.66	1.48	1.67	1.83	NA|NA|NA|0.51111	2.16	1.01018	46.7676
Q562R1	41	ACTBL2	ACTBL_HUMAN Beta-actin-like protein 2 OS=Homo sapiens OX=9606 GN=ACTBL2 PE=1 SV=2			2.42	1.9	||0.14107|0.28688	2.16	0.3677	17.0231
O43149	2011	ZZEF1	ZZEF1_HUMAN Zinc finger ZZ-type and EF-hand domain-containing protein 1 OS=Homo sapiens OX=9606 GN=ZZEF1 PE=1 SV=6				2.16	|||NA	2.16	NA	#VALUE!
Q14697	480	GANAB	GANAB_HUMAN Neutral alpha-glucosidase AB OS=Homo sapiens OX=9606 GN=GANAB PE=1 SV=3				2.16	|||NA	2.16	NA	#VALUE!
Q5VYK3	839	ECPAS	ECM29_HUMAN Proteasome adapter and scaffold protein ECM29 OS=Homo sapiens OX=9606 GN=ECPAS PE=1 SV=2				2.16	|||NA	2.16	NA	#VALUE!
P84098	143	RPL19	RL19_HUMAN 60S ribosomal protein L19 OS=Homo sapiens OX=9606 GN=RPL19 PE=1 SV=1	2.75			1.565	NA|||0.23335	2.1575	0.83792	38.8375
O14980	56	XPO1	XPO1_HUMAN Exportin-1 OS=Homo sapiens OX=9606 GN=XPO1 PE=1 SV=1	2.5	2.45	2.1	1.58	NA|NA|NA|NA	2.1575	0.42414	19.6589
Q9BSD7	4	NTPCR	NTPCR_HUMAN Cancer-related nucleoside-triphosphatase OS=Homo sapiens OX=9606 GN=NTPCR PE=1 SV=1		2.63	1.685		|0.6364|0.26163|	2.1575	0.66822	30.972
Q9Y265	18	RUVBL1	RUVB1_HUMAN RuvB-like 1 OS=Homo sapiens OX=9606 GN=RUVBL1 PE=1 SV=1	2.12	2.41		1.94	NA|NA||NA	2.15667	0.23714	10.9957
P69905	21	HBA1	HBA_HUMAN Hemoglobin subunit alpha OS=Homo sapiens OX=9606 GN=HBA1 PE=1 SV=2	1.23	4	1.6	1.79	NA|NA|0.39921|NA	2.155	1.25179	58.0877
Q13813	1942	SPTAN1	SPTN1_HUMAN Spectrin alpha chain, non-erythrocytic 1 OS=Homo sapiens OX=9606 GN=SPTAN1 PE=1 SV=3	2.29	1.78		2.39	NA|NA||NA	2.15333	0.32716	15.1932
P55060	927	CSE1L	XPO2_HUMAN Exportin-2 OS=Homo sapiens OX=9606 GN=CSE1L PE=1 SV=3	2.71		1.84	1.91	NA||0.05657|0.19837	2.15333	0.48336	22.4471
Q9BZE4	361	GTPBP4	NOG1_HUMAN Nucleolar GTP-binding protein 1 OS=Homo sapiens OX=9606 GN=GTPBP4 PE=1 SV=3	2.795	2.56	1.83	1.42	0.28896|NA|0.57553|0.33287	2.15125	0.63755	29.6363
P62277	90	RPS13	RS13_HUMAN 40S ribosomal protein S13 OS=Homo sapiens OX=9606 GN=RPS13 PE=1 SV=2	2.35	3.06	1.62	1.575	0.34082|0.8451|0.51906|0.26771	2.15125	0.70229	32.6457
P62906	19	RPL10A	RL10A_HUMAN 60S ribosomal protein L10a OS=Homo sapiens OX=9606 GN=RPL10A PE=1 SV=2		2.15			|NA||	2.15	NA	#VALUE!
P14618	464	PKM	KPYM_HUMAN Pyruvate kinase PKM OS=Homo sapiens OX=9606 GN=PKM PE=1 SV=4		2.51	1.42	2.52	|0.74953|0.76173|0.31628	2.15	0.63222	29.4056
Q13620	416	CUL4B	CUL4B_HUMAN Cullin-4B OS=Homo sapiens OX=9606 GN=CUL4B PE=1 SV=4		2.15			|NA||	2.15	NA	#VALUE!
P26358	1545	DNMT1	DNMT1_HUMAN DNA (cytosine-5)-methyltransferase 1 OS=Homo sapiens OX=9606 GN=DNMT1 PE=1 SV=2			1.73	2.57	||NA|NA	2.15	0.59397	27.6265
Q08211	252	DHX9	DHX9_HUMAN ATP-dependent RNA helicase A OS=Homo sapiens OX=9606 GN=DHX9 PE=1 SV=4	1.92	2.55	2.29	1.835	NA|NA|0.89291|0.17678	2.14875	0.33253	15.4755
Q13151	117	HNRNPA0	ROA0_HUMAN Heterogeneous nuclear ribonucleoprotein A0 OS=Homo sapiens OX=9606 GN=HNRNPA0 PE=1 SV=1		3	1.49	1.955	|1.25865|0.28242|0.57276	2.14833	0.77334	35.9973
P17987	542	TCP1	TCPA_HUMAN T-complex protein 1 subunit alpha OS=Homo sapiens OX=9606 GN=TCP1 PE=1 SV=1	2.23	2.26	2.555	1.54	NA|0.48083|0.47376|0.2388	2.14625	0.42995	20.0326
P62701	201	RPS4X	RS4X_HUMAN 40S ribosomal protein S4, X isoform OS=Homo sapiens OX=9606 GN=RPS4X PE=1 SV=2	2.68	3	1.28	1.625	1.04504|0.98678|NA|0.91217	2.14625	0.82379	38.3828
Q9Y2L1	288	DIS3	RRP44_HUMAN Exosome complex exonuclease RRP44 OS=Homo sapiens OX=9606 GN=DIS3 PE=1 SV=2	3.81	1.7	1.085	1.99	NA|NA|0.02121|0.26974	2.14625	1.17159	54.5878
P12270	253	TPR	TPR_HUMAN Nucleoprotein TPR OS=Homo sapiens OX=9606 GN=TPR PE=1 SV=3	2.35	3.25	1.61	1.37	0.31723|NA|0.32654|0.17898	2.145	0.84654	39.4657
Q9Y2X3	301	NOP58	NOP58_HUMAN Nucleolar protein 58 OS=Homo sapiens OX=9606 GN=NOP58 PE=1 SV=1			2.12	2.17	||NA|NA	2.145	0.03536	1.64848
O43776	375	NARS1	SYNC_HUMAN Asparagine--tRNA ligase, cytoplasmic OS=Homo sapiens OX=9606 GN=NARS1 PE=1 SV=1		2.435	1.78	2.215	|1.06773|NA|0.31341	2.14333	0.33333	15.552
Q15393	161	SF3B3	SF3B3_HUMAN Splicing factor 3B subunit 3 OS=Homo sapiens OX=9606 GN=SF3B3 PE=1 SV=4	2.61		1.96	1.855	NA||NA|0.84146	2.14167	0.40897	19.0958
Q96EP5	73	DAZAP1	DAZP1_HUMAN DAZ-associated protein 1 OS=Homo sapiens OX=9606 GN=DAZAP1 PE=1 SV=1	2.77	1.51			NA|NA||	2.14	0.89095	41.6332
P28482	178	MAPK1	MK01_HUMAN Mitogen-activated protein kinase 1 OS=Homo sapiens OX=9606 GN=MAPK1 PE=1 SV=3	2.14				NA|||	2.14	NA	#VALUE!
Q6S8J3	787	POTEE	POTEE_HUMAN POTE ankyrin domain family member E OS=Homo sapiens OX=9606 GN=POTEE PE=2 SV=3		2.07	2.21		|0.50443|0.22871|	2.14	0.09899	4.6257
Q8N163	131	CCAR2	CCAR2_HUMAN Cell cycle and apoptosis regulator protein 2 OS=Homo sapiens OX=9606 GN=CCAR2 PE=1 SV=2		3.14		1.14	|NA||0.40828	2.14	1.41421	66.0846
P35244	92	RPA3	RFA3_HUMAN Replication protein A 14 kDa subunit OS=Homo sapiens OX=9606 GN=RPA3 PE=1 SV=1		3.02	1.53	1.87	|NA|0.0|NA	2.14	0.78083	36.4874
Q6P2Q9	680	PRPF8	PRP8_HUMAN Pre-mRNA-processing-splicing factor 8 OS=Homo sapiens OX=9606 GN=PRPF8 PE=1 SV=2	2.895		1.38		0.60104||NA|	2.1375	1.07127	50.1179
P47897	425	QARS1	SYQ_HUMAN Glutamine--tRNA ligase OS=Homo sapiens OX=9606 GN=QARS1 PE=1 SV=1		2.34	1.93		|NA|NA|	2.135	0.28991	13.5789
Q00839	821	HNRNPU	HNRPU_HUMAN Heterogeneous nuclear ribonucleoprotein U OS=Homo sapiens OX=9606 GN=HNRNPU PE=1 SV=6	1.745	1.86	2.61	2.32	0.0495|0.59506|NA|NA	2.13375	0.40314	18.8935
P52701	826	MSH6	MSH6_HUMAN DNA mismatch repair protein Msh6 OS=Homo sapiens OX=9606 GN=MSH6 PE=1 SV=2	2.58		2.04	1.78	NA||NA|NA	2.13333	0.40808	19.1288
P68133	75	ACTA1	ACTS_HUMAN Actin, alpha skeletal muscle OS=Homo sapiens OX=9606 GN=ACTA1 PE=1 SV=1	3.16	2.94	1.04	1.39	1.39264|0.8268|0.20822|0.42249	2.1325	1.0728	50.3072
P0DMV9	240	HSPA1B	HS71B_HUMAN Heat shock 70 kDa protein 1B OS=Homo sapiens OX=9606 GN=HSPA1B PE=1 SV=1	2.455		1.855	2.085	0.58152||0.80085|0.40036	2.13167	0.30271	14.2006
Q9BQG0	499	MYBBP1A	MBB1A_HUMAN Myb-binding protein 1A OS=Homo sapiens OX=9606 GN=MYBBP1A PE=1 SV=2	2.28	2.24	2.17	1.835	0.16166|NA|NA|0.50205	2.13125	0.20266	9.50897
P06576	102	ATP5F1B	ATPB_HUMAN ATP synthase subunit beta, mitochondrial OS=Homo sapiens OX=9606 GN=ATP5F1B PE=1 SV=3	2.81	2.26	1.61	1.84	0.0|NA|0.58312|0.62638	2.13	0.52719	24.7507
P17844	155	DDX5	DDX5_HUMAN Probable ATP-dependent RNA helicase DDX5 OS=Homo sapiens OX=9606 GN=DDX5 PE=1 SV=1	2.13	1.53	2.33	2.53	0.42426|0.0|NA|NA	2.13	0.43205	20.284
Q9BZE4	59	GTPBP4	NOG1_HUMAN Nucleolar GTP-binding protein 1 OS=Homo sapiens OX=9606 GN=GTPBP4 PE=1 SV=3		2.03	1.75	2.61	|NA|0.76368|0.0	2.13	0.43863	20.593
Q14839	1321	CHD4	CHD4_HUMAN Chromodomain-helicase-DNA-binding protein 4 OS=Homo sapiens OX=9606 GN=CHD4 PE=1 SV=2		2.34	1.92		|NA|NA|	2.13	0.29698	13.9427
Q92616	160	GCN1	GCN1_HUMAN eIF-2-alpha kinase activator GCN1 OS=Homo sapiens OX=9606 GN=GCN1 PE=1 SV=6				2.13	|||NA	2.13	NA	#VALUE!
Q14257	59	RCN2	RCN2_HUMAN Reticulocalbin-2 OS=Homo sapiens OX=9606 GN=RCN2 PE=1 SV=1	2.58	2.785	1.55	1.6	NA|0.82731|NA|NA	2.12875	0.64519	30.3084
Q08211	507	DHX9	DHX9_HUMAN ATP-dependent RNA helicase A OS=Homo sapiens OX=9606 GN=DHX9 PE=1 SV=4	2.125	3.385	1.385	1.615	0.97204|0.7359|1.00258|0.33234	2.1275	0.89355	42
P0CG39	751	POTEJ	POTEJ_HUMAN POTE ankyrin domain family member J OS=Homo sapiens OX=9606 GN=POTEJ PE=3 SV=1	1.99	2.13	2.2	2.19	0.31112|0.36383|0.32155|0.33162	2.1275	0.09674	4.54712
P68133	90	ACTA1	ACTS_HUMAN Actin, alpha skeletal muscle OS=Homo sapiens OX=9606 GN=ACTA1 PE=1 SV=1	1.99	2.13	2.2	2.19	0.31112|0.36383|0.32155|0.33162	2.1275	0.09674	4.54712
P63261	88	ACTG1	ACTG_HUMAN Actin, cytoplasmic 2 OS=Homo sapiens OX=9606 GN=ACTG1 PE=1 SV=1	1.99	2.13	2.2	2.19	0.31112|0.36383|0.32155|0.33162	2.1275	0.09674	4.54712
Q5VTE0	7	EEF1A1P5	EF1A3_HUMAN Putative elongation factor 1-alpha-like 3 OS=Homo sapiens OX=9606 GN=EEF1A1P5 PE=5 SV=1	1.83	2.13	3.5	1.04	0.3677|1.02898|NA|0.67961	2.125	1.02549	48.2584
Q05639	7	EEF1A2	EF1A2_HUMAN Elongation factor 1-alpha 2 OS=Homo sapiens OX=9606 GN=EEF1A2 PE=1 SV=1	1.83	2.13	3.5	1.04	0.3677|1.02898|NA|0.67961	2.125	1.02549	48.2584
P29401	233	TKT	TKT_HUMAN Transketolase OS=Homo sapiens OX=9606 GN=TKT PE=1 SV=3			2.14	2.11	||0.32028|0.33154	2.125	0.02121	0.998118
Q08211	207	DHX9	DHX9_HUMAN ATP-dependent RNA helicase A OS=Homo sapiens OX=9606 GN=DHX9 PE=1 SV=4	1.1		2.49	2.78	1.83941||NA|NA	2.12333	0.89802	42.293
O15067	577	PFAS	PUR4_HUMAN Phosphoribosylformylglycinamidine synthase OS=Homo sapiens OX=9606 GN=PFAS PE=1 SV=4	1.98	1.43	2.96		0.55154|NA|NA|	2.12333	0.77501	36.4997
O43837	155	IDH3B	IDH3B_HUMAN Isocitrate dehydrogenase [NAD] subunit beta, mitochondrial OS=Homo sapiens OX=9606 GN=IDH3B PE=1 SV=2	2.845		1.025	2.5	1.60513||0.45815|0.0	2.12333	0.9667	45.5275
Q92841	138	DDX17	DDX17_HUMAN Probable ATP-dependent RNA helicase DDX17 OS=Homo sapiens OX=9606 GN=DDX17 PE=1 SV=2		3.16	1.33	1.88	|0.05033|0.41176|0.2616	2.12333	0.93895	44.2206
P0CG39	750	POTEJ	POTEJ_HUMAN POTE ankyrin domain family member J OS=Homo sapiens OX=9606 GN=POTEJ PE=3 SV=1	1.97	2.07	2.21	2.24	0.4308|0.50443|0.22871|0.49219	2.1225	0.1258	5.92697
P68133	89	ACTA1	ACTS_HUMAN Actin, alpha skeletal muscle OS=Homo sapiens OX=9606 GN=ACTA1 PE=1 SV=1	1.97	2.07	2.21	2.24	0.4308|0.50443|0.22871|0.49219	2.1225	0.1258	5.92697
P63261	87	ACTG1	ACTG_HUMAN Actin, cytoplasmic 2 OS=Homo sapiens OX=9606 GN=ACTG1 PE=1 SV=1	1.97	2.07	2.21	2.24	0.4308|0.50443|0.22871|0.49219	2.1225	0.1258	5.92697
Q9BQG0	901	MYBBP1A	MBB1A_HUMAN Myb-binding protein 1A OS=Homo sapiens OX=9606 GN=MYBBP1A PE=1 SV=2	2.74	2.235		1.39	0.07071|1.18087||0.57744	2.12167	0.6821	32.1492
Q9H773	38	DCTPP1	DCTP1_HUMAN dCTP pyrophosphatase 1 OS=Homo sapiens OX=9606 GN=DCTPP1 PE=1 SV=1	2.84	2.3	1.665	1.68	0.79493|0.69758|0.24142|1.87974	2.12125	0.56315	26.548
P30043	132	BLVRB	BLVRB_HUMAN Flavin reductase (NADPH) OS=Homo sapiens OX=9606 GN=BLVRB PE=1 SV=3	3.06			1.18	0.35355|||NA	2.12	1.32936	62.7057
Q15181	33	PPA1	IPYR_HUMAN Inorganic pyrophosphatase OS=Homo sapiens OX=9606 GN=PPA1 PE=1 SV=2	2.68	1.93	1.88	1.99	NA|1.58885|NA|0.08145	2.12	0.37603	17.7373
Q9NPD3	206	EXOSC4	EXOS4_HUMAN Exosome complex component RRP41 OS=Homo sapiens OX=9606 GN=EXOSC4 PE=1 SV=3		2.12			|NA||	2.12	NA	#VALUE!
O00231	28	PSMD11	PSD11_HUMAN 26S proteasome non-ATPase regulatory subunit 11 OS=Homo sapiens OX=9606 GN=PSMD11 PE=1 SV=3		2.48		1.76	|NA||NA	2.12	0.50912	24.0151
P06737	523	PYGL	PYGL_HUMAN Glycogen phosphorylase, liver form OS=Homo sapiens OX=9606 GN=PYGL PE=1 SV=4		1.27	3.54	1.55	|0.43879|NA|0.49723	2.12	1.2377	58.3821
P40227	115	CCT6A	TCPZ_HUMAN T-complex protein 1 subunit zeta OS=Homo sapiens OX=9606 GN=CCT6A PE=1 SV=3			2.21	2.03	||0.45|NA	2.12	0.12728	6.00377
Q6P2Q9	2084	PRPF8	PRP8_HUMAN Pre-mRNA-processing-splicing factor 8 OS=Homo sapiens OX=9606 GN=PRPF8 PE=1 SV=2	1.87	2.785	1.7		NA|0.03536|NA|	2.11833	0.58357	27.5486
P39748	280	FEN1	FEN1_HUMAN Flap endonuclease 1 OS=Homo sapiens OX=9606 GN=FEN1 PE=1 SV=1	2.715	2.865	1.46	1.43	0.46765|1.18739|0.29487|0.33717	2.1175	0.77904	36.7906
P16949	64	STMN1	STMN1_HUMAN Stathmin OS=Homo sapiens OX=9606 GN=STMN1 PE=1 SV=3	3.26		0.97		NA||NA|	2.115	1.61927	76.5612
Q99798	673	ACO2	ACON_HUMAN Aconitate hydratase, mitochondrial OS=Homo sapiens OX=9606 GN=ACO2 PE=1 SV=2		2.29		1.94	|NA||NA	2.115	0.24749	11.7017
Q9NZ01	40	TECR	TECR_HUMAN Very-long-chain enoyl-CoA reductase OS=Homo sapiens OX=9606 GN=TECR PE=1 SV=1	2.08	3.01	1.6	1.76	0.92002|1.35902|0.65155|0.32613	2.1125	0.63073	29.857
P46778	70	RPL21	RL21_HUMAN 60S ribosomal protein L21 OS=Homo sapiens OX=9606 GN=RPL21 PE=1 SV=2	2.5	1.63		2.205	0.31113|NA||0.44325	2.11167	0.44245	20.9526
Q5VT66	193	MTARC1	MARC1_HUMAN Mitochondrial amidoxime-reducing component 1 OS=Homo sapiens OX=9606 GN=MTARC1 PE=1 SV=1			2.11		||NA|	2.11	NA	#VALUE!
P61201	255	COPS2	CSN2_HUMAN COP9 signalosome complex subunit 2 OS=Homo sapiens OX=9606 GN=COPS2 PE=1 SV=1		2.075	1.88	2.37	|1.00858|0.22189|0.71089	2.10833	0.24669	11.7007
Q9BYX7	87	POTEKP	ACTBM_HUMAN Putative beta-actin-like protein 3 OS=Homo sapiens OX=9606 GN=POTEKP PE=5 SV=1	1.97			2.24	0.4308|||0.49219	2.105	0.19092	9.06983
P26641	37	EEF1G	EF1G_HUMAN Elongation factor 1-gamma OS=Homo sapiens OX=9606 GN=EEF1G PE=1 SV=3	2.1	2.35	2.06	1.91	0.84596|0.57884|0.44565|0.27727	2.105	0.18267	8.67791
P22695	81	UQCRC2	QCR2_HUMAN Cytochrome b-c1 complex subunit 2, mitochondrial OS=Homo sapiens OX=9606 GN=UQCRC2 PE=1 SV=3	2.33	2.04		1.94	0.59102|NA||0.0	2.10333	0.20257	9.63092
P59998	33	ARPC4	ARPC4_HUMAN Actin-related protein 2/3 complex subunit 4 OS=Homo sapiens OX=9606 GN=ARPC4 PE=1 SV=3	3.41		1.14	1.75	NA||0.0|NA	2.1	1.17478	55.9419
Q8IZ83	643	ALDH16A1	A16A1_HUMAN Aldehyde dehydrogenase family 16 member A1 OS=Homo sapiens OX=9606 GN=ALDH16A1 PE=1 SV=2	1.26	3.18	1.97	1.99	NA|NA|NA|0.55788	2.1	0.79603	37.9062
P34949	112	MPI	MPI_HUMAN Mannose-6-phosphate isomerase OS=Homo sapiens OX=9606 GN=MPI PE=1 SV=2	2.53		1.79	1.98	NA||NA|NA	2.1	0.38432	18.301
P78527	1625	PRKDC	PRKDC_HUMAN DNA-dependent protein kinase catalytic subunit OS=Homo sapiens OX=9606 GN=PRKDC PE=1 SV=3	2.1				NA|||	2.1	NA	#VALUE!
P30044	104	PRDX5	PRDX5_HUMAN Peroxiredoxin-5, mitochondrial OS=Homo sapiens OX=9606 GN=PRDX5 PE=1 SV=4	2.32	3.28	1.57	1.23	1.3027|0.75404|0.34774|0.20712	2.1	0.90896	43.2838
Q9BRA2	16	TXNDC17	TXD17_HUMAN Thioredoxin domain-containing protein 17 OS=Homo sapiens OX=9606 GN=TXNDC17 PE=1 SV=1		2.99	1.94	1.37	|0.54848|0.45255|0.50912	2.1	0.82177	39.1319
Q9UQR0	382	SCML2	SCML2_HUMAN Sex comb on midleg-like protein 2 OS=Homo sapiens OX=9606 GN=SCML2 PE=1 SV=1		2.29		1.91	|NA||NA	2.1	0.2687	12.7952
P21108	12	PRPS1L1	PRPS3_HUMAN Ribose-phosphate pyrophosphokinase 3 OS=Homo sapiens OX=9606 GN=PRPS1L1 PE=1 SV=2			2.1		||0.05774|	2.1	NA	#VALUE!
P07437	264	TUBB	TBB5_HUMAN Tubulin beta chain OS=Homo sapiens OX=9606 GN=TUBB PE=1 SV=2	2.29	2.045	2.225	1.83	0.6475|0.54203|0.62651|0.86292	2.0975	0.20626	9.83361
Q9BVA1	264	TUBB2B	TBB2B_HUMAN Tubulin beta-2B chain OS=Homo sapiens OX=9606 GN=TUBB2B PE=1 SV=1	2.29	2.045	2.225	1.83	0.6475|0.54203|0.62651|0.86292	2.0975	0.20626	9.83361
P04350	264	TUBB4A	TBB4A_HUMAN Tubulin beta-4A chain OS=Homo sapiens OX=9606 GN=TUBB4A PE=1 SV=2	2.29	2.045	2.225	1.83	0.6475|0.54203|0.62651|0.86292	2.0975	0.20626	9.83361
P68371	264	TUBB4B	TBB4B_HUMAN Tubulin beta-4B chain OS=Homo sapiens OX=9606 GN=TUBB4B PE=1 SV=1	2.29	2.045	2.225	1.83	0.6475|0.54203|0.62651|0.86292	2.0975	0.20626	9.83361
Q9BUF5	264	TUBB6	TBB6_HUMAN Tubulin beta-6 chain OS=Homo sapiens OX=9606 GN=TUBB6 PE=1 SV=1	2.29	2.045	2.225	1.83	0.6475|0.54203|0.62651|0.86292	2.0975	0.20626	9.83361
P62244	44	RPS15A	RS15A_HUMAN 40S ribosomal protein S15a OS=Homo sapiens OX=9606 GN=RPS15A PE=1 SV=2	3.01	2.78	1.96	0.64	NA|NA|0.73077|NA	2.0975	1.07109	51.0651
Q15084	86	PDIA6	PDIA6_HUMAN Protein disulfide-isomerase A6 OS=Homo sapiens OX=9606 GN=PDIA6 PE=1 SV=1	1.78	1.72	2.135	2.745	0.28449|0.21741|0.3765|1.20539	2.095	0.47044	22.4554
Q9ULX3	17	NOB1	NOB1_HUMAN RNA-binding protein NOB1 OS=Homo sapiens OX=9606 GN=NOB1 PE=1 SV=1		2.9	1.29		|NA|NA|	2.095	1.13844	54.3408
Q9NQW7	466	XPNPEP1	XPP1_HUMAN Xaa-Pro aminopeptidase 1 OS=Homo sapiens OX=9606 GN=XPNPEP1 PE=1 SV=3		2.3	1.89		|NA|NA|	2.095	0.28991	13.8382
P23396	207	RPS3	RS3_HUMAN 40S ribosomal protein S3 OS=Homo sapiens OX=9606 GN=RPS3 PE=1 SV=2			2.165	2.025	||0.41719|0.09192	2.095	0.09899	4.72506
P11940	617	PABPC1	PABP1_HUMAN Polyadenylate-binding protein 1 OS=Homo sapiens OX=9606 GN=PABPC1 PE=1 SV=2	1.66		2.57	2.05	NA||0.08083|0.31113	2.09333	0.45654	21.8093
Q9Y230	27	RUVBL2	RUVB2_HUMAN RuvB-like 2 OS=Homo sapiens OX=9606 GN=RUVBL2 PE=1 SV=3	2.56	1.82	1.93	2.06	NA|NA|0.31113|0.0	2.0925	0.32674	15.6148
Q9NR30	218	DDX21	DDX21_HUMAN Nucleolar RNA helicase 2 OS=Homo sapiens OX=9606 GN=DDX21 PE=1 SV=5		2.375	2.03	1.87	|0.61163|0.59214|0.38682	2.09167	0.25809	12.3389
Q9BYX7	88	POTEKP	ACTBM_HUMAN Putative beta-actin-like protein 3 OS=Homo sapiens OX=9606 GN=POTEKP PE=5 SV=1	1.99			2.19	0.31112|||0.33162	2.09	0.14142	6.76651
Q96QK1	387	VPS35	VPS35_HUMAN Vacuolar protein sorting-associated protein 35 OS=Homo sapiens OX=9606 GN=VPS35 PE=1 SV=2	2.09				NA|||	2.09	NA	#VALUE!
O15371	225	EIF3D	EIF3D_HUMAN Eukaryotic translation initiation factor 3 subunit D OS=Homo sapiens OX=9606 GN=EIF3D PE=1 SV=1	2.81	2.18	1.55	1.82	0.33941|1.28255|0.24028|0.0	2.09	0.54498	26.0756
P50990	219	CCT8	TCPQ_HUMAN T-complex protein 1 subunit theta OS=Homo sapiens OX=9606 GN=CCT8 PE=1 SV=4	2.09		1.73	2.45	NA||NA|0.86267	2.09	0.36	17.2249
O00193	61	SMAP	SMAP_HUMAN Small acidic protein OS=Homo sapiens OX=9606 GN=SMAP PE=1 SV=1		2.24		1.94	|0.65962||1.16109	2.09	0.21213	10.1498
Q13547	68	HDAC1	HDAC1_HUMAN Histone deacetylase 1 OS=Homo sapiens OX=9606 GN=HDAC1 PE=1 SV=1		2.87	1.88	1.52	|0.0|NA|NA	2.09	0.69907	33.4483
P38159	275	RBMX	RBMX_HUMAN RNA-binding motif protein, X chromosome OS=Homo sapiens OX=9606 GN=RBMX PE=1 SV=3			1.87	2.31	||NA|0.47857	2.09	0.31113	14.8866
P35606	623	COPB2	COPB2_HUMAN Coatomer subunit beta' OS=Homo sapiens OX=9606 GN=COPB2 PE=1 SV=2			2.09		||NA|	2.09	NA	#VALUE!
O00231	178	PSMD11	PSD11_HUMAN 26S proteasome non-ATPase regulatory subunit 11 OS=Homo sapiens OX=9606 GN=PSMD11 PE=1 SV=3				2.09	|||NA	2.09	NA	#VALUE!
Q03252	267	LMNB2	LMNB2_HUMAN Lamin-B2 OS=Homo sapiens OX=9606 GN=LMNB2 PE=1 SV=4	4.21	1.855	1.15	1.14	NA|1.78898|0.54271|0.24042	2.08875	1.45324	69.5746
P54886	338	ALDH18A1	P5CS_HUMAN Delta-1-pyrroline-5-carboxylate synthase OS=Homo sapiens OX=9606 GN=ALDH18A1 PE=1 SV=2	3.01	2.095	1.445	1.8	0.36661|0.69862|0.2367|0.31293	2.0875	0.66996	32.0939
P50914	20	RPL14	RL14_HUMAN 60S ribosomal protein L14 OS=Homo sapiens OX=9606 GN=RPL14 PE=1 SV=4	2.53	2.2	1.72	1.895	0.19799|NA|0.33779|0.67175	2.08625	0.35617	17.0723
Q9BWD1	127	ACAT2	THIC_HUMAN Acetyl-CoA acetyltransferase, cytosolic OS=Homo sapiens OX=9606 GN=ACAT2 PE=1 SV=2	2.36	1.735	2.28	1.97	NA|0.99702|0.48497|0.0	2.08625	0.28831	13.8195
Q9NRX1	102	PNO1	PNO1_HUMAN RNA-binding protein PNO1 OS=Homo sapiens OX=9606 GN=PNO1 PE=1 SV=1	2.65	1.92	2.45	1.32	NA|NA|0.0|NA	2.085	0.59579	28.5751
P11388	295	TOP2A	TOP2A_HUMAN DNA topoisomerase 2-alpha OS=Homo sapiens OX=9606 GN=TOP2A PE=1 SV=3			2.13	2.04	||NA|0.29698	2.085	0.06364	3.05228
P53396	563	ACLY	ACLY_HUMAN ATP-citrate synthase OS=Homo sapiens OX=9606 GN=ACLY PE=1 SV=3	3.04	1.79	1.53	1.975	NA|0.0|1.51579|0.99674	2.08375	0.66312	31.8234
Q9GZZ9	133	UBA5	UBA5_HUMAN Ubiquitin-like modifier-activating enzyme 5 OS=Homo sapiens OX=9606 GN=UBA5 PE=1 SV=1		2.53		1.635	|0.0||0.07778	2.0825	0.63286	30.3894
Q9H773	51	DCTPP1	DCTP1_HUMAN dCTP pyrophosphatase 1 OS=Homo sapiens OX=9606 GN=DCTPP1 PE=1 SV=1	2.49	2.435	1.675	1.72	NA|0.18886|0.2007|0.23169	2.08	0.44262	21.2798
Q99536	353	VAT1	VAT1_HUMAN Synaptic vesicle membrane protein VAT-1 homolog OS=Homo sapiens OX=9606 GN=VAT1 PE=1 SV=2		2.21	2.25	1.78	|0.90714|NA|0.24062	2.08	0.26058	12.5279
Q96EY7	232	PTCD3	PTCD3_HUMAN Pentatricopeptide repeat domain-containing protein 3, mitochondrial OS=Homo sapiens OX=9606 GN=PTCD3 PE=1 SV=3		2.08			|NA||	2.08	NA	#VALUE!
Q00610	1458	CLTC	CLH1_HUMAN Clathrin heavy chain 1 OS=Homo sapiens OX=9606 GN=CLTC PE=1 SV=5			2.08		||NA|	2.08	NA	#VALUE!
Q6I9Y2	148	THOC7	THOC7_HUMAN THO complex subunit 7 homolog OS=Homo sapiens OX=9606 GN=THOC7 PE=1 SV=3			2.08		||NA|	2.08	NA	#VALUE!
O43852	29	CALU	CALU_HUMAN Calumenin OS=Homo sapiens OX=9606 GN=CALU PE=1 SV=2				2.08	|||NA	2.08	NA	#VALUE!
P31040	621	SDHA	SDHA_HUMAN Succinate dehydrogenase [ubiquinone] flavoprotein subunit, mitochondrial OS=Homo sapiens OX=9606 GN=SDHA PE=1 SV=2				2.08	|||NA	2.08	NA	#VALUE!
P50454	108	SERPINH1	SERPH_HUMAN Serpin H1 OS=Homo sapiens OX=9606 GN=SERPINH1 PE=1 SV=2				2.08	|||0.64663	2.08	NA	#VALUE!
Q9NRX4	81	PHPT1	PHP14_HUMAN 14 kDa phosphohistidine phosphatase OS=Homo sapiens OX=9606 GN=PHPT1 PE=1 SV=1	2.64	2.8	1.745	1.13	NA|NA|0.62933|NA	2.07875	0.78458	37.7429
O15144	202	ARPC2	ARPC2_HUMAN Actin-related protein 2/3 complex subunit 2 OS=Homo sapiens OX=9606 GN=ARPC2 PE=1 SV=1		1.79	1.375	3.07	|NA|0.23335|NA	2.07833	0.88352	42.5111
Q9BQG0	586	MYBBP1A	MBB1A_HUMAN Myb-binding protein 1A OS=Homo sapiens OX=9606 GN=MYBBP1A PE=1 SV=2	1.59		2.06	2.58	NA||NA|NA	2.07667	0.49521	23.8464
P62191	368	PSMC1	PRS4_HUMAN 26S proteasome regulatory subunit 4 OS=Homo sapiens OX=9606 GN=PSMC1 PE=1 SV=1	1.1		2.55	2.58	NA||NA|NA	2.07667	0.84595	40.7359
Q14204	75	DYNC1H1	DYHC1_HUMAN Cytoplasmic dynein 1 heavy chain 1 OS=Homo sapiens OX=9606 GN=DYNC1H1 PE=1 SV=5			1.57	2.58	||NA|NA	2.075	0.71418	34.4183
P60228	12	EIF3E	EIF3E_HUMAN Eukaryotic translation initiation factor 3 subunit E OS=Homo sapiens OX=9606 GN=EIF3E PE=1 SV=1		2.85	2.17	1.2	|NA|NA|NA	2.07333	0.82924	39.9956
P05023	685	ATP1A1	AT1A1_HUMAN Sodium/potassium-transporting ATPase subunit alpha-1 OS=Homo sapiens OX=9606 GN=ATP1A1 PE=1 SV=1	3.145	0.88	1.935	2.33	0.95031|0.95122|0.32928|0.67811	2.0725	0.94119	45.4133
Q9NVI7	613	ATAD3A	ATD3A_HUMAN ATPase family AAA domain-containing protein 3A OS=Homo sapiens OX=9606 GN=ATAD3A PE=1 SV=2			2.04	2.105	||NA|0.17678	2.0725	0.04596	2.21761
P31948	36	STIP1	STIP1_HUMAN Stress-induced-phosphoprotein 1 OS=Homo sapiens OX=9606 GN=STIP1 PE=1 SV=1	2.97	1.42	1.82		0.61785|NA|0.34429|	2.07	0.80467	38.8729
P49368	420	CCT3	TCPG_HUMAN T-complex protein 1 subunit gamma OS=Homo sapiens OX=9606 GN=CCT3 PE=1 SV=4	2.97	1.17			NA|NA||	2.07	1.27279	61.4874
O95202	662	LETM1	LETM1_HUMAN Mitochondrial proton/calcium exchanger protein OS=Homo sapiens OX=9606 GN=LETM1 PE=1 SV=1			2.07		||NA|	2.07	NA	#VALUE!
Q8N5M4	120	TTC9C	TTC9C_HUMAN Tetratricopeptide repeat protein 9C OS=Homo sapiens OX=9606 GN=TTC9C PE=1 SV=1				2.07	|||0.0	2.07	NA	#VALUE!
Q14974	844	KPNB1	IMB1_HUMAN Importin subunit beta-1 OS=Homo sapiens OX=9606 GN=KPNB1 PE=1 SV=2	2.04	2.09			NA|NA||	2.065	0.03536	1.71235
Q9Y383	215	LUC7L2	LC7L2_HUMAN Putative RNA-binding protein Luc7-like 2 OS=Homo sapiens OX=9606 GN=LUC7L2 PE=1 SV=2	1.77	2.13	2.14	2.22	0.35771|0.77726|0.27903|0.40037	2.065	0.20075	9.72155
Q15181	106	PPA1	IPYR_HUMAN Inorganic pyrophosphatase OS=Homo sapiens OX=9606 GN=PPA1 PE=1 SV=2	1.48	2.05	1.72	3	NA|NA|NA|NA	2.0625	0.66725	32.3515
P26599	133	PTBP1	PTBP1_HUMAN Polypyrimidine tract-binding protein 1 OS=Homo sapiens OX=9606 GN=PTBP1 PE=1 SV=1	2.17	1.92	2.185	1.97	0.54781|0.80734|0.45279|0.98976	2.06125	0.13592	6.59406
P62701	36	RPS4X	RS4X_HUMAN 40S ribosomal protein S4, X isoform OS=Homo sapiens OX=9606 GN=RPS4X PE=1 SV=2	3.07		2.03	1.08	NA||NA|NA	2.06	0.99534	48.3175
Q86XP3	840	DDX42	DDX42_HUMAN ATP-dependent RNA helicase DDX42 OS=Homo sapiens OX=9606 GN=DDX42 PE=1 SV=1	2.38		1.74		NA||NA|	2.06	0.45255	21.9684
P19623	284	SRM	SPEE_HUMAN Spermidine synthase OS=Homo sapiens OX=9606 GN=SRM PE=1 SV=1	2.06				NA|||	2.06	NA	#VALUE!
P83731	17	RPL24	RL24_HUMAN 60S ribosomal protein L24 OS=Homo sapiens OX=9606 GN=RPL24 PE=1 SV=1	2.06				NA|||	2.06	NA	#VALUE!
Q9BQ75	207	CMSS1	CMS1_HUMAN Protein CMSS1 OS=Homo sapiens OX=9606 GN=CMSS1 PE=1 SV=2	2.06				NA|||	2.06	NA	#VALUE!
P06280	125	GLA	AGAL_HUMAN Alpha-galactosidase A OS=Homo sapiens OX=9606 GN=GLA PE=1 SV=1			1.8	2.32	||NA|0.55154	2.06	0.3677	17.8495
Q14498	116	RBM39	RBM39_HUMAN RNA-binding protein 39 OS=Homo sapiens OX=9606 GN=RBM39 PE=1 SV=2			1.97	2.15	||NA|NA	2.06	0.12728	6.17864
P62750	107	RPL23A	RL23A_HUMAN 60S ribosomal protein L23a OS=Homo sapiens OX=9606 GN=RPL23A PE=1 SV=1				2.06	|||NA	2.06	NA	#VALUE!
Q8IZL8	57	PELP1	PELP1_HUMAN Proline-, glutamic acid- and leucine-rich protein 1 OS=Homo sapiens OX=9606 GN=PELP1 PE=1 SV=2	2.88		1.235		NA||0.14849|	2.0575	1.16319	56.5341
Q14839	1320	CHD4	CHD4_HUMAN Chromodomain-helicase-DNA-binding protein 4 OS=Homo sapiens OX=9606 GN=CHD4 PE=1 SV=2	2.905		1.51	1.75	0.23335||NA|0.33	2.055	0.74584	36.2939
P78371	122	CCT2	TCPB_HUMAN T-complex protein 1 subunit beta OS=Homo sapiens OX=9606 GN=CCT2 PE=1 SV=4		2.68	1.43		|NA|NA|	2.055	0.88388	43.0112
Q12906	331	ILF3	ILF3_HUMAN Interleukin enhancer-binding factor 3 OS=Homo sapiens OX=9606 GN=ILF3 PE=1 SV=3	2.38	2.14	1.71	1.98	1.0819|1.64089|0.57951|0.67109	2.0525	0.28135	13.7077
P09429	31	HMGB1	HMGB1_HUMAN High mobility group protein B1 OS=Homo sapiens OX=9606 GN=HMGB1 PE=1 SV=3	2.42	2.42	1.655	1.71	0.73616|0.52453|0.36081|0.3423	2.05125	0.42639	20.7868
P50995	333	ANXA11	ANX11_HUMAN Annexin A11 OS=Homo sapiens OX=9606 GN=ANXA11 PE=1 SV=1	3		1.1		NA||NA|	2.05	1.3435	65.5366
P11177	242	PDHB	ODPB_HUMAN Pyruvate dehydrogenase E1 component subunit beta, mitochondrial OS=Homo sapiens OX=9606 GN=PDHB PE=1 SV=3	2.05				NA|||	2.05	NA	#VALUE!
Q14980	778	NUMA1	NUMA1_HUMAN Nuclear mitotic apparatus protein 1 OS=Homo sapiens OX=9606 GN=NUMA1 PE=1 SV=2		2.05			|NA||	2.05	NA	#VALUE!
Q9NUJ1	255	ABHD10	ABHDA_HUMAN Palmitoyl-protein thioesterase ABHD10, mitochondrial OS=Homo sapiens OX=9606 GN=ABHD10 PE=1 SV=1			2.05		||NA|	2.05	NA	#VALUE!
O14980	399	XPO1	XPO1_HUMAN Exportin-1 OS=Homo sapiens OX=9606 GN=XPO1 PE=1 SV=1			2.36	1.74	||NA|0.29698	2.05	0.43841	21.3859
P51572	230	BCAP31	BAP31_HUMAN B-cell receptor-associated protein 31 OS=Homo sapiens OX=9606 GN=BCAP31 PE=1 SV=3				2.05	|||NA	2.05	NA	#VALUE!
Q96HN2	341	AHCYL2	SAHH3_HUMAN Adenosylhomocysteinase 3 OS=Homo sapiens OX=9606 GN=AHCYL2 PE=1 SV=1	1.43	3.29	2.22	1.25	NA|0.3677|NA|0.55154	2.0475	0.92931	45.3875
Q08170	136	SRSF4	SRSF4_HUMAN Serine/arginine-rich splicing factor 4 OS=Homo sapiens OX=9606 GN=SRSF4 PE=1 SV=2		2.5	1.595		|NA|0.98288|	2.0475	0.63993	31.2542
P38606	468	ATP6V1A	VATA_HUMAN V-type proton ATPase catalytic subunit A OS=Homo sapiens OX=9606 GN=ATP6V1A PE=1 SV=2	0.96		2.8	2.38	0.0||NA|1.86676	2.04667	0.96423	47.1121
Q96PK6	533	RBM14	RBM14_HUMAN RNA-binding protein 14 OS=Homo sapiens OX=9606 GN=RBM14 PE=1 SV=2	2.5			1.585	NA|||0.76129	2.0425	0.647	31.6769
P62263	94	RPS14	RS14_HUMAN 40S ribosomal protein S14 OS=Homo sapiens OX=9606 GN=RPS14 PE=1 SV=3	2.43	2.25	2.075	1.41	0.54994|0.19287|0.68133|0.49122	2.04125	0.44509	21.8048
P11142	594	HSPA8	HSP7C_HUMAN Heat shock cognate 71 kDa protein OS=Homo sapiens OX=9606 GN=HSPA8 PE=1 SV=1	2.46	2.09		1.57	NA|0.94752||0.76029	2.04	0.4471	21.9167
Q9UJX3	50	ANAPC7	APC7_HUMAN Anaphase-promoting complex subunit 7 OS=Homo sapiens OX=9606 GN=ANAPC7 PE=1 SV=4		2.04			|NA||	2.04	NA	#VALUE!
Q4KMP7	423	TBC1D10B	TB10B_HUMAN TBC1 domain family member 10B OS=Homo sapiens OX=9606 GN=TBC1D10B PE=1 SV=3				2.04	|||0.0	2.04	NA	#VALUE!
Q9NZI7	79	UBP1	UBIP1_HUMAN Upstream-binding protein 1 OS=Homo sapiens OX=9606 GN=UBP1 PE=1 SV=1				2.04	|||NA	2.04	NA	#VALUE!
P04406	306	GAPDH	G3P_HUMAN Glyceraldehyde-3-phosphate dehydrogenase OS=Homo sapiens OX=9606 GN=GAPDH PE=1 SV=3				2.04	|||NA	2.04	NA	#VALUE!
P27708	458	CAD	PYR1_HUMAN CAD protein OS=Homo sapiens OX=9606 GN=CAD PE=1 SV=3	1.77	2.11	2.455	1.82	NA|NA|0.45611|NA	2.03875	0.31539	15.4698
Q99613	155	EIF3C	EIF3C_HUMAN Eukaryotic translation initiation factor 3 subunit C OS=Homo sapiens OX=9606 GN=EIF3C PE=1 SV=1	3.14	1.45	1.52		0.12728|NA|0.45255|	2.03667	0.95616	46.9472
P31040	202	SDHA	SDHA_HUMAN Succinate dehydrogenase [ubiquinone] flavoprotein subunit, mitochondrial OS=Homo sapiens OX=9606 GN=SDHA PE=1 SV=2		2.08	2.37	1.66	|0.0|NA|NA	2.03667	0.35698	17.5276
P50990	471	CCT8	TCPQ_HUMAN T-complex protein 1 subunit theta OS=Homo sapiens OX=9606 GN=CCT8 PE=1 SV=4	2.44	1.61	2.325	1.77	0.17098|0.28148|0.0495|0.53885	2.03625	0.40783	20.0285
P78527	2233	PRKDC	PRKDC_HUMAN DNA-dependent protein kinase catalytic subunit OS=Homo sapiens OX=9606 GN=PRKDC PE=1 SV=3	2.84	1.46	1.91	1.93	0.18735|NA|0.08185|0.40648	2.035	0.57888	28.4462
Q9NR30	219	DDX21	DDX21_HUMAN Nucleolar RNA helicase 2 OS=Homo sapiens OX=9606 GN=DDX21 PE=1 SV=5			1.7	2.37	||0.30533|0.41371	2.035	0.47376	23.2806
P24539	164	ATP5PB	AT5F1_HUMAN ATP synthase F(0) complex subunit B1, mitochondrial OS=Homo sapiens OX=9606 GN=ATP5PB PE=1 SV=2	2.33	2.07	1.495	2.24	NA|NA|0.23335|0.23116	2.03375	0.375	18.4388
Q13263	341	TRIM28	TIF1B_HUMAN Transcription intermediary factor 1-beta OS=Homo sapiens OX=9606 GN=TRIM28 PE=1 SV=5	2.48	2.42	1.89	1.34	NA|NA|NA|0.50912	2.0325	0.53238	26.1934
P0DMV9	332	HSPA1B	HS71B_HUMAN Heat shock 70 kDa protein 1B OS=Homo sapiens OX=9606 GN=HSPA1B PE=1 SV=1		2.575	1.35	2.17	|0.23335|0.6753|0.97861	2.03167	0.62411	30.7191
P31153	89	MAT2A	METK2_HUMAN S-adenosylmethionine synthase isoform type-2 OS=Homo sapiens OX=9606 GN=MAT2A PE=1 SV=1	2.36	1.7			NA|NA||	2.03	0.46669	22.9897
O75607	91	NPM3	NPM3_HUMAN Nucleoplasmin-3 OS=Homo sapiens OX=9606 GN=NPM3 PE=1 SV=3		1.52		2.54	|NA||NA	2.03	0.72125	35.5296
Q9Y262	281	EIF3L	EIF3L_HUMAN Eukaryotic translation initiation factor 3 subunit L OS=Homo sapiens OX=9606 GN=EIF3L PE=1 SV=1		2.3	1.77	2.02	|NA|NA|NA	2.03	0.26514	13.0611
Q9BY77	175	POLDIP3	PDIP3_HUMAN Polymerase delta-interacting protein 3 OS=Homo sapiens OX=9606 GN=POLDIP3 PE=1 SV=2			2.03		||NA|	2.03	NA	#VALUE!
Q99880	50	H2BC13	H2B1L_HUMAN Histone H2B type 1-L OS=Homo sapiens OX=9606 GN=H2BC13 PE=1 SV=3				2.03	|||0.32138	2.03	NA	#VALUE!
Q8N257	50	H2BU1	H2B3B_HUMAN Histone H2B type 3-B OS=Homo sapiens OX=9606 GN=H2BU1 PE=1 SV=3				2.03	|||0.32138	2.03	NA	#VALUE!
P46783	44	RPS10	RS10_HUMAN 40S ribosomal protein S10 OS=Homo sapiens OX=9606 GN=RPS10 PE=1 SV=1				2.03	|||NA	2.03	NA	#VALUE!
P22314	808	UBA1	UBA1_HUMAN Ubiquitin-like modifier-activating enzyme 1 OS=Homo sapiens OX=9606 GN=UBA1 PE=1 SV=3	2.86		1.44	1.785	0.45255||0.2424|0.27195	2.02833	0.74061	36.5133
P30153	340	PPP2R1A	2AAA_HUMAN Serine/threonine-protein phosphatase 2A 65 kDa regulatory subunit A alpha isoform OS=Homo sapiens OX=9606 GN=PPP2R1A PE=1 SV=4	2.5	2.75	1.67	1.19	NA|0.09899|0.39598|0.3677	2.0275	0.72445	35.7312
Q13885	264	TUBB2A	TBB2A_HUMAN Tubulin beta-2A chain OS=Homo sapiens OX=9606 GN=TUBB2A PE=1 SV=1			2.225	1.83	||0.62651|0.86292	2.0275	0.27931	13.7761
Q9NR30	468	DDX21	DDX21_HUMAN Nucleolar RNA helicase 2 OS=Homo sapiens OX=9606 GN=DDX21 PE=1 SV=5			2.36	1.695	||NA|0.13435	2.0275	0.47023	23.1926
P62906	84	RPL10A	RL10A_HUMAN 60S ribosomal protein L10a OS=Homo sapiens OX=9606 GN=RPL10A PE=1 SV=2	2.95	2.185	1.52	1.45	0.98995|1.28365|0.0|0.04163	2.02625	0.69925	34.5096
Q9GZT3	82	SLIRP	SLIRP_HUMAN SRA stem-loop-interacting RNA-binding protein, mitochondrial OS=Homo sapiens OX=9606 GN=SLIRP PE=1 SV=1	2.39	1.395		2.29	1.92333|0.24749||NA	2.025	0.54788	27.0558
P37837	197	TALDO1	TALDO_HUMAN Transaldolase OS=Homo sapiens OX=9606 GN=TALDO1 PE=1 SV=2	2.62	3.02	0.58	1.88	NA|0.43841|NA|0.2797	2.025	1.07286	52.9807
P26599	236	PTBP1	PTBP1_HUMAN Polypyrimidine tract-binding protein 1 OS=Homo sapiens OX=9606 GN=PTBP1 PE=1 SV=1		3.31	1.49	1.275	|NA|0.29597|0.34648	2.025	1.11802	55.2109
P56378	57	ATP5MPL	ATP68_HUMAN ATP synthase subunit ATP5MPL, mitochondrial OS=Homo sapiens OX=9606 GN=ATP5MPL PE=1 SV=1			1.79	2.26	||0.0|NA	2.025	0.33234	16.4119
P08243	213	ASNS	ASNS_HUMAN Asparagine synthetase [glutamine-hydrolyzing] OS=Homo sapiens OX=9606 GN=ASNS PE=1 SV=4		2.805	1.555	1.71	|0.54445|0.43307|0.3216	2.02333	0.68137	33.6757
Q9BXP5	529	SRRT	SRRT_HUMAN Serrate RNA effector molecule homolog OS=Homo sapiens OX=9606 GN=SRRT PE=1 SV=1	2.52			1.525	NA|||0.12021	2.0225	0.70357	34.7871
Q12906	18	ILF3	ILF3_HUMAN Interleukin enhancer-binding factor 3 OS=Homo sapiens OX=9606 GN=ILF3 PE=1 SV=3	2.34		1.385	2.34	0.52326||1.05359|0.15588	2.02167	0.55137	27.273
P08237	298	PFKM	PFKAM_HUMAN ATP-dependent 6-phosphofructokinase, muscle type OS=Homo sapiens OX=9606 GN=PFKM PE=1 SV=2	2.88	1.16			NA|NA||	2.02	1.21622	60.2089
P17858	298	PFKL	PFKAL_HUMAN ATP-dependent 6-phosphofructokinase, liver type OS=Homo sapiens OX=9606 GN=PFKL PE=1 SV=6	2.88	1.16			NA|NA||	2.02	1.21622	60.2089
Q8IWS0	229	PHF6	PHF6_HUMAN PHD finger protein 6 OS=Homo sapiens OX=9606 GN=PHF6 PE=1 SV=1	1.4			2.64	NA|||0.25813	2.02	0.87681	43.4064
P11142	332	HSPA8	HSP7C_HUMAN Heat shock cognate 71 kDa protein OS=Homo sapiens OX=9606 GN=HSPA8 PE=1 SV=1	2.27		1.86	1.93	NA||NA|0.4915	2.02	0.21932	10.8574
O75643	940	SNRNP200	U520_HUMAN U5 small nuclear ribonucleoprotein 200 kDa helicase OS=Homo sapiens OX=9606 GN=SNRNP200 PE=1 SV=2		2.02			|NA||	2.02	NA	#VALUE!
O94776	425	MTA2	MTA2_HUMAN Metastasis-associated protein MTA2 OS=Homo sapiens OX=9606 GN=MTA2 PE=1 SV=1			2.33	1.71	||NA|NA	2.02	0.43841	21.7035
P49736	301	MCM2	MCM2_HUMAN DNA replication licensing factor MCM2 OS=Homo sapiens OX=9606 GN=MCM2 PE=1 SV=4			2.45	1.59	||NA|NA	2.02	0.60811	30.1045
P30046	77	DDT	DOPD_HUMAN D-dopachrome decarboxylase OS=Homo sapiens OX=9606 GN=DDT PE=1 SV=3				2.02	|||NA	2.02	NA	#VALUE!
P07237	417	P4HB	PDIA1_HUMAN Protein disulfide-isomerase OS=Homo sapiens OX=9606 GN=P4HB PE=1 SV=3	3.06	1.98	1.27	1.765	1.24664|1.08894|0.83439|0.08981	2.01875	0.75514	37.4063
P56192	714	MARS1	SYMC_HUMAN Methionine--tRNA ligase, cytoplasmic OS=Homo sapiens OX=9606 GN=MARS1 PE=1 SV=2	2.465		1.57		2.39709||0.45236|	2.0175	0.63286	31.3685
P31930	223	UQCRC1	QCR1_HUMAN Cytochrome b-c1 complex subunit 1, mitochondrial OS=Homo sapiens OX=9606 GN=UQCRC1 PE=1 SV=3	2.41	2.15	1.99	1.51	0.74312|0.40869|0.81664|0.57763	2.015	0.37855	18.7866
P49327	2248	FASN	FAS_HUMAN Fatty acid synthase OS=Homo sapiens OX=9606 GN=FASN PE=1 SV=3	2	2.275	1.625	2.16	NA|0.34492|0.60157|0.25456	2.015	0.2834	14.0645
Q15021	859	NCAPD2	CND1_HUMAN Condensin complex subunit 1 OS=Homo sapiens OX=9606 GN=NCAPD2 PE=1 SV=3	2.38		1.65		NA||NA|	2.015	0.51619	25.6174
P61254	24	RPL26	RL26_HUMAN 60S ribosomal protein L26 OS=Homo sapiens OX=9606 GN=RPL26 PE=1 SV=1		1.02	2.55	2.475	|NA|0.93724|0.37328	2.015	0.86251	42.8045
Q13347	284	EIF3I	EIF3I_HUMAN Eukaryotic translation initiation factor 3 subunit I OS=Homo sapiens OX=9606 GN=EIF3I PE=1 SV=1		1.91		2.12	|NA||NA	2.015	0.14849	7.36923
Q9Y2X3	84	NOP58	NOP58_HUMAN Nucleolar protein 58 OS=Homo sapiens OX=9606 GN=NOP58 PE=1 SV=1	2.5	2.645	1.69	1.22	0.82024|0.62933|NA|NA	2.01375	0.67571	33.5548
P22695	308	UQCRC2	QCR2_HUMAN Cytochrome b-c1 complex subunit 2, mitochondrial OS=Homo sapiens OX=9606 GN=UQCRC2 PE=1 SV=3	1.77	1.78	2.49		NA|NA|NA|	2.01333	0.41284	20.5053
P68871	98	HBB	HBB_HUMAN Hemoglobin subunit beta OS=Homo sapiens OX=9606 GN=HBB PE=1 SV=2	2.07	2.78	1.67	1.53	0.80825|0.60964|0.20304|0.22367	2.0125	0.5605	27.8509
P27708	1770	CAD	PYR1_HUMAN CAD protein OS=Homo sapiens OX=9606 GN=CAD PE=1 SV=3	2.26	2.2	1.6	1.99	0.46586|0.86245|0.0|0.43841	2.0125	0.29837	14.8258
Q9BVC5	179	C2orf49	ASHWN_HUMAN Ashwin OS=Homo sapiens OX=9606 GN=C2orf49 PE=1 SV=1	2.01				NA|||	2.01	NA	#VALUE!
P06733	68	ENO1	ENOA_HUMAN Alpha-enolase OS=Homo sapiens OX=9606 GN=ENO1 PE=1 SV=2	1.5		2.52		NA||NA|	2.01	0.72125	35.8831
P35573	423	AGL	GDE_HUMAN Glycogen debranching enzyme OS=Homo sapiens OX=9606 GN=AGL PE=1 SV=3	2.01				NA|||	2.01	NA	#VALUE!
O43707	776	ACTN4	ACTN4_HUMAN Alpha-actinin-4 OS=Homo sapiens OX=9606 GN=ACTN4 PE=1 SV=2	0.98			3.04	NA|||0.25456	2.01	1.45664	72.4697
P60891	250	PRPS1	PRPS1_HUMAN Ribose-phosphate pyrophosphokinase 1 OS=Homo sapiens OX=9606 GN=PRPS1 PE=1 SV=2	1.86			2.16	0.0|||0.0	2.01	0.21213	10.5537
Q9Y5P6	127	GMPPB	GMPPB_HUMAN Mannose-1-phosphate guanyltransferase beta OS=Homo sapiens OX=9606 GN=GMPPB PE=1 SV=2			2.01		||NA|	2.01	NA	#VALUE!
P41252	73	IARS1	SYIC_HUMAN Isoleucine--tRNA ligase, cytoplasmic OS=Homo sapiens OX=9606 GN=IARS1 PE=1 SV=2	2.265	2.16	1.785	1.825	0.25435|NA|0.03742|0.00707	2.00875	0.2397	11.9328
Q5VTE0	15	EEF1A1P5	EF1A3_HUMAN Putative elongation factor 1-alpha-like 3 OS=Homo sapiens OX=9606 GN=EEF1A1P5 PE=5 SV=1	2.27	1.94	1.84	1.98	0.49513|0.21213|0.44546|0.36592	2.0075	0.18464	9.19751
Q05639	15	EEF1A2	EF1A2_HUMAN Elongation factor 1-alpha 2 OS=Homo sapiens OX=9606 GN=EEF1A2 PE=1 SV=1	2.27	1.94	1.84	1.98	0.49513|0.21213|0.44546|0.36592	2.0075	0.18464	9.19751
P04350	28	TUBB4A	TBB4A_HUMAN Tubulin beta-4A chain OS=Homo sapiens OX=9606 GN=TUBB4A PE=1 SV=2	2.45	2.07	1.96	1.55	NA|NA|NA|0.42899	2.0075	0.37026	18.4438
P68371	28	TUBB4B	TBB4B_HUMAN Tubulin beta-4B chain OS=Homo sapiens OX=9606 GN=TUBB4B PE=1 SV=1	2.45	2.07	1.96	1.55	NA|NA|NA|0.42899	2.0075	0.37026	18.4438
P61962	165	DCAF7	DCAF7_HUMAN DDB1- and CUL4-associated factor 7 OS=Homo sapiens OX=9606 GN=DCAF7 PE=1 SV=1	1.44	2.81	1.77		NA|NA|NA|	2.00667	0.71501	35.6317
P98175	795	RBM10	RBM10_HUMAN RNA-binding protein 10 OS=Homo sapiens OX=9606 GN=RBM10 PE=1 SV=3	2.13	1.78	2.03	2.08	NA|NA|0.52539|NA	2.005	0.15546	7.75362
P31943	194	HNRNPH1	HNRH1_HUMAN Heterogeneous nuclear ribonucleoprotein H OS=Homo sapiens OX=9606 GN=HNRNPH1 PE=1 SV=4	2.955	1.62	2.27	1.17	0.51882|NA|0.02309|1.10567	2.00375	0.7785	38.8522
Q7L2H7	222	EIF3M	EIF3M_HUMAN Eukaryotic translation initiation factor 3 subunit M OS=Homo sapiens OX=9606 GN=EIF3M PE=1 SV=1	2.87	1.72	1.1	2.325	NA|0.87681|0.23653|0.15588	2.00375	0.76395	38.126
P08238	315	HSP90AB1	HS90B_HUMAN Heat shock protein HSP 90-beta OS=Homo sapiens OX=9606 GN=HSP90AB1 PE=1 SV=4	2.05	3.21	1.39	1.36	1.19071|NA|0.56569|0.17692	2.0025	0.86569	43.2305
P07900	323	HSP90AA1	HS90A_HUMAN Heat shock protein HSP 90-alpha OS=Homo sapiens OX=9606 GN=HSP90AA1 PE=1 SV=5	2.05	3.21	1.39	1.36	1.19071|NA|0.56569|0.17692	2.0025	0.86569	43.2305
Q9H9B4	171	SFXN1	SFXN1_HUMAN Sideroflexin-1 OS=Homo sapiens OX=9606 GN=SFXN1 PE=1 SV=4	2.515	1.64	1.85		0.92631|0.82561|0.58364|	2.00167	0.45679	22.8204
O15143	30	ARPC1B	ARC1B_HUMAN Actin-related protein 2/3 complex subunit 1B OS=Homo sapiens OX=9606 GN=ARPC1B PE=1 SV=3	2				NA|||	2	NA	#VALUE!
P54886	784	ALDH18A1	P5CS_HUMAN Delta-1-pyrroline-5-carboxylate synthase OS=Homo sapiens OX=9606 GN=ALDH18A1 PE=1 SV=2	2.2	2.16	1.75	1.89	0.97441|0.45545|0.16247|0.15972	2	0.21618	10.809
Q9Y3I0	150	RTCB	RTCB_HUMAN RNA-splicing ligase RtcB homolog OS=Homo sapiens OX=9606 GN=RTCB PE=1 SV=1	1.84	2.79	1.37		NA|NA|NA|	2	0.72339	36.1695
P19784	292	CSNK2A2	CSK22_HUMAN Casein kinase II subunit alpha' OS=Homo sapiens OX=9606 GN=CSNK2A2 PE=1 SV=1		2			|NA||	2	NA	#VALUE!
P46781	124	RPS9	RS9_HUMAN 40S ribosomal protein S9 OS=Homo sapiens OX=9606 GN=RPS9 PE=1 SV=3				2	|||NA	2	NA	#VALUE!
Q9Y696	74	CLIC4	CLIC4_HUMAN Chloride intracellular channel protein 4 OS=Homo sapiens OX=9606 GN=CLIC4 PE=1 SV=4				2	|||0.0	2	NA	#VALUE!
Q15008	251	PSMD6	PSMD6_HUMAN 26S proteasome non-ATPase regulatory subunit 6 OS=Homo sapiens OX=9606 GN=PSMD6 PE=1 SV=1	3.01	2.86	0.68	1.44	0.0866|0.96167|NA|0.6	1.9975	1.12778	56.4596
P26583	31	HMGB2	HMGB2_HUMAN High mobility group protein B2 OS=Homo sapiens OX=9606 GN=HMGB2 PE=1 SV=2	2.47	2.2	1.54	1.775	0.50707|0.44797|0.44288|0.24272	1.99625	0.41756	20.9172
P52597	99	HNRNPF	HNRPF_HUMAN Heterogeneous nuclear ribonucleoprotein F OS=Homo sapiens OX=9606 GN=HNRNPF PE=1 SV=3	2.64	1.87	1.385	2.085	0.05657|1.08099|0.42996|0.19092	1.995	0.52021	26.0757
O60749	409	SNX2	SNX2_HUMAN Sorting nexin-2 OS=Homo sapiens OX=9606 GN=SNX2 PE=1 SV=2	2.595		1.3	2.09	0.0495||NA|NA	1.995	0.65271	32.7173
O75533	692	SF3B1	SF3B1_HUMAN Splicing factor 3B subunit 1 OS=Homo sapiens OX=9606 GN=SF3B1 PE=1 SV=3	3.08	2.38	1.01	1.51	NA|NA|0.18385|NA	1.995	0.9185	46.0401
P62993	58	GRB2	GRB2_HUMAN Growth factor receptor-bound protein 2 OS=Homo sapiens OX=9606 GN=GRB2 PE=1 SV=1	1.95	2.55	1.93	1.545	0.42426|0.0|NA|0.91217	1.99375	0.41504	20.8171
P36873	248	PPP1CC	PP1G_HUMAN Serine/threonine-protein phosphatase PP1-gamma catalytic subunit OS=Homo sapiens OX=9606 GN=PPP1CC PE=1 SV=1		2.47	1.515		|0.70692|0.25981|	1.9925	0.67529	33.8916
P31153	379	MAT2A	METK2_HUMAN S-adenosylmethionine synthase isoform type-2 OS=Homo sapiens OX=9606 GN=MAT2A PE=1 SV=1	2.31	3.41	1.765	0.48	NA|NA|0.61518|NA	1.99125	1.21786	61.1606
P51532	900	SMARCA4	SMCA4_HUMAN Transcription activator BRG1 OS=Homo sapiens OX=9606 GN=SMARCA4 PE=1 SV=2	1.78	3	1.19		NA|NA|NA|	1.99	0.92309	46.3864
O00186	296	STXBP3	STXB3_HUMAN Syntaxin-binding protein 3 OS=Homo sapiens OX=9606 GN=STXBP3 PE=1 SV=2	1.99				NA|||	1.99	NA	#VALUE!
P35606	319	COPB2	COPB2_HUMAN Coatomer subunit beta' OS=Homo sapiens OX=9606 GN=COPB2 PE=1 SV=2		2.29	2.025	1.655	|NA|0.09192|0.41347	1.99	0.31894	16.0271
P78527	2670	PRKDC	PRKDC_HUMAN DNA-dependent protein kinase catalytic subunit OS=Homo sapiens OX=9606 GN=PRKDC PE=1 SV=3		1.99			|NA||	1.99	NA	#VALUE!
P33991	744	MCM4	MCM4_HUMAN DNA replication licensing factor MCM4 OS=Homo sapiens OX=9606 GN=MCM4 PE=1 SV=5			1.99		||NA|	1.99	NA	#VALUE!
P06737	37	PYGL	PYGL_HUMAN Glycogen phosphorylase, liver form OS=Homo sapiens OX=9606 GN=PYGL PE=1 SV=4			1.99		||NA|	1.99	NA	#VALUE!
P11216	37	PYGB	PYGB_HUMAN Glycogen phosphorylase, brain form OS=Homo sapiens OX=9606 GN=PYGB PE=1 SV=5			1.99		||NA|	1.99	NA	#VALUE!
Q9NYF8	614	BCLAF1	BCLF1_HUMAN Bcl-2-associated transcription factor 1 OS=Homo sapiens OX=9606 GN=BCLAF1 PE=1 SV=2				1.99	|||NA	1.99	NA	#VALUE!
Q14697	786	GANAB	GANAB_HUMAN Neutral alpha-glucosidase AB OS=Homo sapiens OX=9606 GN=GANAB PE=1 SV=3	1.94	1.74	1.675	2.6	0.25675|0.71976|0.67175|0.0	1.98875	0.42282	21.2606
P62241	116	RPS8	RS8_HUMAN 40S ribosomal protein S8 OS=Homo sapiens OX=9606 GN=RPS8 PE=1 SV=2	1.925	3.04	1.87	1.12	0.4879|NA|0.62454|0.0	1.98875	0.79121	39.7843
P43686	187	PSMC4	PRS6B_HUMAN 26S proteasome regulatory subunit 6B OS=Homo sapiens OX=9606 GN=PSMC4 PE=1 SV=2	2.76	2.4	1.13	1.655	NA|0.0|0.26763|0.0866	1.98625	0.73321	36.9143
O75874	133	IDH1	IDHC_HUMAN Isocitrate dehydrogenase [NADP] cytoplasmic OS=Homo sapiens OX=9606 GN=IDH1 PE=1 SV=2	2.72		1.7	1.53	0.2687||0.08485|0.09535	1.98333	0.64361	32.451
P49327	1731	FASN	FAS_HUMAN Fatty acid synthase OS=Homo sapiens OX=9606 GN=FASN PE=1 SV=3	2.285	1.835	1.83		0.37477|0.12021|0.57158|	1.98333	0.26126	13.1728
P03243	377		E1B55_ADE05 E1B 55 kDa protein OS=Human adenovirus C serotype 5 OX=28285 PE=1 SV=1	1.85	2.355	1.245	2.475	0.34775|0.10344|0.38891|0.21856	1.98125	0.56059	28.2948
Q13136	73	PPFIA1	LIPA1_HUMAN Liprin-alpha-1 OS=Homo sapiens OX=9606 GN=PPFIA1 PE=1 SV=1	2.16			1.8	NA|||0.0	1.98	0.25456	12.8566
Q99623	69	PHB2	PHB2_HUMAN Prohibitin-2 OS=Homo sapiens OX=9606 GN=PHB2 PE=1 SV=2	3.01		1.85	1.08	NA||0.07071|0.4279	1.98	0.97155	49.0682
P21333	1443	FLNA	FLNA_HUMAN Filamin-A OS=Homo sapiens OX=9606 GN=FLNA PE=1 SV=4			1.98		||NA|	1.98	NA	#VALUE!
Q9BW92	437	TARS2	SYTM_HUMAN Threonine--tRNA ligase, mitochondrial OS=Homo sapiens OX=9606 GN=TARS2 PE=1 SV=1			1.98		||NA|	1.98	NA	#VALUE!
P21108	193	PRPS1L1	PRPS3_HUMAN Ribose-phosphate pyrophosphokinase 3 OS=Homo sapiens OX=9606 GN=PRPS1L1 PE=1 SV=2		2.06	1.895		|0.81768|0.7268|	1.9775	0.11667	5.89987
P11908	193	PRPS2	PRPS2_HUMAN Ribose-phosphate pyrophosphokinase 2 OS=Homo sapiens OX=9606 GN=PRPS2 PE=1 SV=2		2.66	2.045	1.225	|NA|0.57276|0.3182	1.97667	0.71994	36.4219
Q6FI13	124	H2AC18	H2A2A_HUMAN Histone H2A type 2-A OS=Homo sapiens OX=9606 GN=H2AC18 PE=1 SV=3		1.975			|0.0495||	1.975	NA	#VALUE!
P30566	159	ADSL	PUR8_HUMAN Adenylosuccinate lyase OS=Homo sapiens OX=9606 GN=ADSL PE=1 SV=2	2.32	2.17	1.67	1.735	NA|NA|0.37971|0.26163	1.97375	0.32024	16.225
P46783	32	RPS10	RS10_HUMAN 40S ribosomal protein S10 OS=Homo sapiens OX=9606 GN=RPS10 PE=1 SV=1	2.175	2.2		1.535	0.14849|0.16042||0.00707	1.97	0.37693	19.1335
Q13347	294	EIF3I	EIF3I_HUMAN Eukaryotic translation initiation factor 3 subunit I OS=Homo sapiens OX=9606 GN=EIF3I PE=1 SV=1	2.09			1.85	NA|||NA	1.97	0.16971	8.61472
Q7KZF4	191	SND1	SND1_HUMAN Staphylococcal nuclease domain-containing protein 1 OS=Homo sapiens OX=9606 GN=SND1 PE=1 SV=1			1.97		||NA|	1.97	NA	#VALUE!
O14530	110	TXNDC9	TXND9_HUMAN Thioredoxin domain-containing protein 9 OS=Homo sapiens OX=9606 GN=TXNDC9 PE=1 SV=2			1.97		||NA|	1.97	NA	#VALUE!
P35558	513	PCK1	PCKGC_HUMAN Phosphoenolpyruvate carboxykinase, cytosolic [GTP] OS=Homo sapiens OX=9606 GN=PCK1 PE=1 SV=3			1.97		||NA|	1.97	NA	#VALUE!
Q8IYD1	291	GSPT2	ERF3B_HUMAN Eukaryotic peptide chain release factor GTP-binding subunit ERF3B OS=Homo sapiens OX=9606 GN=GSPT2 PE=1 SV=2			2.135	1.8	||0.24749|0.40278	1.9675	0.23688	12.0396
P15170	162	GSPT1	ERF3A_HUMAN Eukaryotic peptide chain release factor GTP-binding subunit ERF3A OS=Homo sapiens OX=9606 GN=GSPT1 PE=1 SV=1			2.135	1.8	||0.24749|0.40278	1.9675	0.23688	12.0396
Q14697	785	GANAB	GANAB_HUMAN Neutral alpha-glucosidase AB OS=Homo sapiens OX=9606 GN=GANAB PE=1 SV=3	1.94		2.17	1.79	NA||NA|0.3725	1.96667	0.1914	9.73219
P61247	158	RPS3A	RS3A_HUMAN 40S ribosomal protein S3a OS=Homo sapiens OX=9606 GN=RPS3A PE=1 SV=2	1.345	1.51	2.3	2.71	0.47376|NA|NA|0.58756	1.96625	0.64773	32.9424
P07437	37	TUBB	TBB5_HUMAN Tubulin beta chain OS=Homo sapiens OX=9606 GN=TUBB PE=1 SV=2	2.125	2.735	1.47	1.535	0.46508|0.54176|0.43139|0.44879	1.96625	0.59116	30.0654
O60749	200	SNX2	SNX2_HUMAN Sorting nexin-2 OS=Homo sapiens OX=9606 GN=SNX2 PE=1 SV=2		2.7	1.23		|NA|NA|	1.965	1.03945	52.8982
O75569	137	PRKRA	PRKRA_HUMAN Interferon-inducible double-stranded RNA-dependent protein kinase activator A OS=Homo sapiens OX=9606 GN=PRKRA PE=1 SV=1		2.34		1.59	|NA||NA	1.965	0.53033	26.9888
P54886	527	ALDH18A1	P5CS_HUMAN Delta-1-pyrroline-5-carboxylate synthase OS=Homo sapiens OX=9606 GN=ALDH18A1 PE=1 SV=2	2.65	2.14	1.48	1.585	NA|NA|0.27232|0.19092	1.96375	0.54144	27.5717
Q99873	137	PRMT1	ANM1_HUMAN Protein arginine N-methyltransferase 1 OS=Homo sapiens OX=9606 GN=PRMT1 PE=1 SV=3		2.37	1.64	1.88	|0.0|0.31475|0.33171	1.96333	0.37207	18.951
Q9GZZ1	65	NAA50	NAA50_HUMAN N-alpha-acetyltransferase 50 OS=Homo sapiens OX=9606 GN=NAA50 PE=1 SV=1	2.145			1.78	0.50205|||NA	1.9625	0.25809	13.1511
P49327	2475	FASN	FAS_HUMAN Fatty acid synthase OS=Homo sapiens OX=9606 GN=FASN PE=1 SV=3	2.73		1.86	1.295	0.46669||0.17479|0.78719	1.96167	0.72288	36.8502
Q16891	455	IMMT	MIC60_HUMAN MICOS complex subunit MIC60 OS=Homo sapiens OX=9606 GN=IMMT PE=1 SV=1		2.49	1.43		|NA|NA|	1.96	0.74953	38.2413
Q9Y221	82	NIP7	NIP7_HUMAN 60S ribosome subunit biogenesis protein NIP7 homolog OS=Homo sapiens OX=9606 GN=NIP7 PE=1 SV=1			1.96		||NA|	1.96	NA	#VALUE!
Q8WVM8	402	SCFD1	SCFD1_HUMAN Sec1 family domain-containing protein 1 OS=Homo sapiens OX=9606 GN=SCFD1 PE=1 SV=4			1.96		||NA|	1.96	NA	#VALUE!
P61158	192	ACTR3	ARP3_HUMAN Actin-related protein 3 OS=Homo sapiens OX=9606 GN=ACTR3 PE=1 SV=3				1.96	|||NA	1.96	NA	#VALUE!
P61978	415	HNRNPK	HNRPK_HUMAN Heterogeneous nuclear ribonucleoprotein K OS=Homo sapiens OX=9606 GN=HNRNPK PE=1 SV=1	2.85	0.87	2.33	1.785	0.50807|NA|0.50912|0.54447	1.95875	0.84611	43.1964
P13693	124	TPT1	TCTP_HUMAN Translationally-controlled tumor protein OS=Homo sapiens OX=9606 GN=TPT1 PE=1 SV=1	2.29	1.325	2.67	1.55	0.9051|0.02121|NA|0.80033	1.95875	0.62831	32.0771
Q8N999	42	C12orf29	CL029_HUMAN Uncharacterized protein C12orf29 OS=Homo sapiens OX=9606 GN=C12orf29 PE=1 SV=2	2.99		1.87	1.01	NA||NA|NA	1.95667	0.99284	50.7413
Q07666	151	KHDRBS1	KHDR1_HUMAN KH domain-containing, RNA-binding, signal transduction-associated protein 1 OS=Homo sapiens OX=9606 GN=KHDRBS1 PE=1 SV=1	1.88		2.33	1.655	NA||0.54271|0.95459	1.955	0.34369	17.5801
P30086	26	PEBP1	PEBP1_HUMAN Phosphatidylethanolamine-binding protein 1 OS=Homo sapiens OX=9606 GN=PEBP1 PE=1 SV=3	2.46		1.57	1.835	NA||0.69296|0.06364	1.955	0.45697	23.3744
O14980	466	XPO1	XPO1_HUMAN Exportin-1 OS=Homo sapiens OX=9606 GN=XPO1 PE=1 SV=1	2.12	1.79			NA|NA||	1.955	0.23335	11.9361
Q14566	785	MCM6	MCM6_HUMAN DNA replication licensing factor MCM6 OS=Homo sapiens OX=9606 GN=MCM6 PE=1 SV=1	0.92		3.59	1.355	NA||0.0|0.55861	1.955	1.43256	73.2767
Q9Y2S7	367	POLDIP2	PDIP2_HUMAN Polymerase delta-interacting protein 2 OS=Homo sapiens OX=9606 GN=POLDIP2 PE=1 SV=1	2.62	2.14	1.59	1.46	NA|NA|NA|0.64961	1.9525	0.53375	27.3367
Q9UQ35	1067	SRRM2	SRRM2_HUMAN Serine/arginine repetitive matrix protein 2 OS=Homo sapiens OX=9606 GN=SRRM2 PE=1 SV=2	2.52			1.38	0.0|||NA	1.95	0.8061	41.3385
Q04724	498	TLE1	TLE1_HUMAN Transducin-like enhancer protein 1 OS=Homo sapiens OX=9606 GN=TLE1 PE=1 SV=2	1.95				NA|||	1.95	NA	#VALUE!
Q92841	235	DDX17	DDX17_HUMAN Probable ATP-dependent RNA helicase DDX17 OS=Homo sapiens OX=9606 GN=DDX17 PE=1 SV=2	1.85		2.43	1.57	0.47159||0.0|0.51384	1.95	0.43863	22.4938
P49458	66	SRP9	SRP09_HUMAN Signal recognition particle 9 kDa protein OS=Homo sapiens OX=9606 GN=SRP9 PE=1 SV=2		1.95			|NA||	1.95	NA	#VALUE!
Q969Z0	308	TBRG4	FAKD4_HUMAN FAST kinase domain-containing protein 4 OS=Homo sapiens OX=9606 GN=TBRG4 PE=1 SV=1			1.95		||NA|	1.95	NA	#VALUE!
P47755	23	CAPZA2	CAZA2_HUMAN F-actin-capping protein subunit alpha-2 OS=Homo sapiens OX=9606 GN=CAPZA2 PE=1 SV=3			1.83	2.07	||0.0|NA	1.95	0.16971	8.70308
Q13347	271	EIF3I	EIF3I_HUMAN Eukaryotic translation initiation factor 3 subunit I OS=Homo sapiens OX=9606 GN=EIF3I PE=1 SV=1				1.95	|||NA	1.95	NA	#VALUE!
P28066	186	PSMA5	PSA5_HUMAN Proteasome subunit alpha type-5 OS=Homo sapiens OX=9606 GN=PSMA5 PE=1 SV=3	1.615	2.75		1.48	0.84146|NA||NA	1.94833	0.69754	35.8019
Q9Y676	114	MRPS18B	RT18B_HUMAN 28S ribosomal protein S18b, mitochondrial OS=Homo sapiens OX=9606 GN=MRPS18B PE=1 SV=1	1.93	1.96			NA|NA||	1.945	0.02121	1.09049
P62424	236	RPL7A	RL7A_HUMAN 60S ribosomal protein L7a OS=Homo sapiens OX=9606 GN=RPL7A PE=1 SV=2	1.31	2.65	2.05	1.77	NA|1.16903|0.81251|0.58256	1.945	0.56033	28.8087
Q08211	799	DHX9	DHX9_HUMAN ATP-dependent RNA helicase A OS=Homo sapiens OX=9606 GN=DHX9 PE=1 SV=4		2.03		1.86	|NA||NA	1.945	0.12021	6.18046
O75533	1283	SF3B1	SF3B1_HUMAN Splicing factor 3B subunit 1 OS=Homo sapiens OX=9606 GN=SF3B1 PE=1 SV=3			1.99	1.9	||0.0|NA	1.945	0.06364	3.27198
P42167	304	TMPO	LAP2B_HUMAN Lamina-associated polypeptide 2, isoforms beta/gamma OS=Homo sapiens OX=9606 GN=TMPO PE=1 SV=2	1.805	2.595		1.43	1.0253|0.41719||NA	1.94333	0.59469	30.6016
P49368	526	CCT3	TCPG_HUMAN T-complex protein 1 subunit gamma OS=Homo sapiens OX=9606 GN=CCT3 PE=1 SV=4	2.36	2.13	1.765	1.515	0.93602|1.24451|0.72995|0.46783	1.9425	0.37582	19.3472
P35580	43	MYH10	MYH10_HUMAN Myosin-10 OS=Homo sapiens OX=9606 GN=MYH10 PE=1 SV=3	1.94				NA|||	1.94	NA	#VALUE!
Q9BV38	342	WDR18	WDR18_HUMAN WD repeat-containing protein 18 OS=Homo sapiens OX=9606 GN=WDR18 PE=1 SV=2	2.775		1.105		1.393||0.09192|	1.94	1.18087	60.8696
Q14CX7	6	NAA25	NAA25_HUMAN N-alpha-acetyltransferase 25, NatB auxiliary subunit OS=Homo sapiens OX=9606 GN=NAA25 PE=1 SV=1		1.94			|NA||	1.94	NA	#VALUE!
P36578	282	RPL4	RL4_HUMAN 60S ribosomal protein L4 OS=Homo sapiens OX=9606 GN=RPL4 PE=1 SV=5		1.94			|NA||	1.94	NA	#VALUE!
Q14166	143	TTLL12	TTL12_HUMAN Tubulin--tyrosine ligase-like protein 12 OS=Homo sapiens OX=9606 GN=TTLL12 PE=1 SV=2	1.75			2.12	NA|||NA	1.935	0.26163	13.5209
Q9NR30	413	DDX21	DDX21_HUMAN Nucleolar RNA helicase 2 OS=Homo sapiens OX=9606 GN=DDX21 PE=1 SV=5			1.44	2.43	||0.32527|0.49217	1.935	0.70004	36.1778
P23246	483	SFPQ	SFPQ_HUMAN Splicing factor, proline- and glutamine-rich OS=Homo sapiens OX=9606 GN=SFPQ PE=1 SV=2		2.11	1.755		|0.4572|0.79903|	1.9325	0.25102	12.9894
P53597	273	SUCLG1	SUCA_HUMAN Succinate--CoA ligase [ADP/GDP-forming] subunit alpha, mitochondrial OS=Homo sapiens OX=9606 GN=SUCLG1 PE=1 SV=4	1.93				NA|||	1.93	NA	#VALUE!
P14866	438	HNRNPL	HNRPL_HUMAN Heterogeneous nuclear ribonucleoprotein L OS=Homo sapiens OX=9606 GN=HNRNPL PE=1 SV=2	2.6	1.31	2.22	1.59	0.39598|NA|NA|NA	1.93	0.5868	30.4041
P42704	164	LRPPRC	LPPRC_HUMAN Leucine-rich PPR motif-containing protein, mitochondrial OS=Homo sapiens OX=9606 GN=LRPPRC PE=1 SV=3	2.47	1.66	1.68	1.91	NA|0.33486|NA|NA	1.93	0.37745	19.557
Q9H7S9	484	ZNF703	ZN703_HUMAN Zinc finger protein 703 OS=Homo sapiens OX=9606 GN=ZNF703 PE=1 SV=1		1.93			|NA||	1.93	NA	#VALUE!
P36915	458	GNL1	GNL1_HUMAN Guanine nucleotide-binding protein-like 1 OS=Homo sapiens OX=9606 GN=GNL1 PE=1 SV=2		1.93			|0.62148||	1.93	NA	#VALUE!
P08195	236	SLC3A2	4F2_HUMAN 4F2 cell-surface antigen heavy chain OS=Homo sapiens OX=9606 GN=SLC3A2 PE=1 SV=3			1.93		||NA|	1.93	NA	#VALUE!
Q92499	582	DDX1	DDX1_HUMAN ATP-dependent RNA helicase DDX1 OS=Homo sapiens OX=9606 GN=DDX1 PE=1 SV=2	2.78	1.26	1.455	2.22	NA|0.23671|0.77075|NA	1.92875	0.70264	36.4298
O00571	512	DDX3X	DDX3X_HUMAN ATP-dependent RNA helicase DDX3X OS=Homo sapiens OX=9606 GN=DDX3X PE=1 SV=3	1.76	2.185		1.84	1.11723|0.68589||0.61256	1.92833	0.22585	11.7122
Q14204	1695	DYNC1H1	DYHC1_HUMAN Cytoplasmic dynein 1 heavy chain 1 OS=Homo sapiens OX=9606 GN=DYNC1H1 PE=1 SV=5		2.09	1.73	1.96	|NA|0.0|NA	1.92667	0.1823	9.46192
P22695	212	UQCRC2	QCR2_HUMAN Cytochrome b-c1 complex subunit 2, mitochondrial OS=Homo sapiens OX=9606 GN=UQCRC2 PE=1 SV=3	2.31	1.27	2.19		NA|NA|NA|	1.92333	0.56898	29.5831
P25705	345	ATP5F1A	ATPA_HUMAN ATP synthase subunit alpha, mitochondrial OS=Homo sapiens OX=9606 GN=ATP5F1A PE=1 SV=1	3.35	1.03	1.65	1.66	NA|NA|0.29143|0.34588	1.9225	0.99624	51.82
P62314	12	SNRPD1	SMD1_HUMAN Small nuclear ribonucleoprotein Sm D1 OS=Homo sapiens OX=9606 GN=SNRPD1 PE=1 SV=1	1.99	1.59	2.54	1.56	NA|NA|NA|NA	1.92	0.45746	23.826
O60341	259	KDM1A	KDM1A_HUMAN Lysine-specific histone demethylase 1A OS=Homo sapiens OX=9606 GN=KDM1A PE=1 SV=2		1.92			|NA||	1.92	NA	#VALUE!
P62847	29	RPS24	RS24_HUMAN 40S ribosomal protein S24 OS=Homo sapiens OX=9606 GN=RPS24 PE=1 SV=1			1.92		||NA|	1.92	NA	#VALUE!
Q86X55	319	CARM1	CARM1_HUMAN Histone-arginine methyltransferase CARM1 OS=Homo sapiens OX=9606 GN=CARM1 PE=1 SV=3			2.69	1.15	||NA|NA	1.92	1.08894	56.7156
Q01469	97	FABP5	FABP5_HUMAN Fatty acid-binding protein 5 OS=Homo sapiens OX=9606 GN=FABP5 PE=1 SV=3				1.92	|||NA	1.92	NA	#VALUE!
Q96F86	447	EDC3	EDC3_HUMAN Enhancer of mRNA-decapping protein 3 OS=Homo sapiens OX=9606 GN=EDC3 PE=1 SV=1				1.92	|||NA	1.92	NA	#VALUE!
P22102	680	GART	PUR2_HUMAN Trifunctional purine biosynthetic protein adenosine-3 OS=Homo sapiens OX=9606 GN=GART PE=1 SV=1	2.62	1.425	1.99	1.64	NA|0.55861|0.17796|0.57477	1.91875	0.52228	27.2198
P31948	382	STIP1	STIP1_HUMAN Stress-induced-phosphoprotein 1 OS=Homo sapiens OX=9606 GN=STIP1 PE=1 SV=1	1.45	2.335	1.97		NA|0.57276|0.74809|	1.91833	0.44476	23.1847
P46087	745	NOP2	NOP2_HUMAN Probable 28S rRNA (cytosine(4447)-C(5))-methyltransferase OS=Homo sapiens OX=9606 GN=NOP2 PE=1 SV=2	1.11	1.19	3.45		NA|NA|NA|	1.91667	1.32851	69.3134
Q6UB35	154	MTHFD1L	C1TM_HUMAN Monofunctional C1-tetrahydrofolate synthase, mitochondrial OS=Homo sapiens OX=9606 GN=MTHFD1L PE=1 SV=1	1.5			2.33	NA|||NA	1.915	0.5869	30.6475
O00231	322	PSMD11	PSD11_HUMAN 26S proteasome non-ATPase regulatory subunit 11 OS=Homo sapiens OX=9606 GN=PSMD11 PE=1 SV=3			1.86	1.97	||0.47803|0.14142	1.915	0.07778	4.06162
O60716	273	CTNND1	CTND1_HUMAN Catenin delta-1 OS=Homo sapiens OX=9606 GN=CTNND1 PE=1 SV=1	1.555	1.38	2.345	2.375	1.08187|NA|0.7566|0.70004	1.91375	0.52036	27.1906
Q12849	466	GRSF1	GRSF1_HUMAN G-rich sequence factor 1 OS=Homo sapiens OX=9606 GN=GRSF1 PE=1 SV=3		2.41	1.415		|NA|0.36062|	1.9125	0.70357	36.788
P07814	1242	EPRS1	SYEP_HUMAN Bifunctional glutamate/proline--tRNA ligase OS=Homo sapiens OX=9606 GN=EPRS1 PE=1 SV=5			2.285	1.54	||0.44548|0.02828	1.9125	0.52679	27.5446
Q92499	728	DDX1	DDX1_HUMAN ATP-dependent RNA helicase DDX1 OS=Homo sapiens OX=9606 GN=DDX1 PE=1 SV=2	1.91				0.33941|||	1.91	NA	#VALUE!
P07197	183	NEFM	NFM_HUMAN Neurofilament medium polypeptide OS=Homo sapiens OX=9606 GN=NEFM PE=1 SV=3		1.91			|NA||	1.91	NA	#VALUE!
P21333	2525	FLNA	FLNA_HUMAN Filamin-A OS=Homo sapiens OX=9606 GN=FLNA PE=1 SV=4		1.91			|NA||	1.91	NA	#VALUE!
Q7L576	1058	CYFIP1	CYFP1_HUMAN Cytoplasmic FMR1-interacting protein 1 OS=Homo sapiens OX=9606 GN=CYFIP1 PE=1 SV=1		1.71	2.11		|NA|NA|	1.91	0.28284	14.8084
P31040	122	SDHA	SDHA_HUMAN Succinate dehydrogenase [ubiquinone] flavoprotein subunit, mitochondrial OS=Homo sapiens OX=9606 GN=SDHA PE=1 SV=2			2.02	1.8	||0.37363|0.64663	1.91	0.15556	8.1445
Q15021	1096	NCAPD2	CND1_HUMAN Condensin complex subunit 1 OS=Homo sapiens OX=9606 GN=NCAPD2 PE=1 SV=3				1.91	|||NA	1.91	NA	#VALUE!
O75533	226	SF3B1	SF3B1_HUMAN Splicing factor 3B subunit 1 OS=Homo sapiens OX=9606 GN=SF3B1 PE=1 SV=3	2.09		1.51	2.12	NA||NA|NA	1.90667	0.34385	18.0341
Q9Y230	344	RUVBL2	RUVB2_HUMAN RuvB-like 2 OS=Homo sapiens OX=9606 GN=RUVBL2 PE=1 SV=3	1.225	1.945	1.59	2.86	0.57276|0.95263|0.07506|1.56978	1.905	0.70125	36.811
P49411	65	TUFM	EFTU_HUMAN Elongation factor Tu, mitochondrial OS=Homo sapiens OX=9606 GN=TUFM PE=1 SV=2		2.585	1.81	1.32	|0.17678|NA|0.40509	1.905	0.63783	33.4819
Q96J01	276	THOC3	THOC3_HUMAN THO complex subunit 3 OS=Homo sapiens OX=9606 GN=THOC3 PE=1 SV=1	2.57	1.25	1.89		NA|0.17898|NA|	1.90333	0.6601	34.6813
P62269	125	RPS18	RS18_HUMAN 40S ribosomal protein S18 OS=Homo sapiens OX=9606 GN=RPS18 PE=1 SV=3	1.26		2.04	2.41	NA||NA|0.64469	1.90333	0.58705	30.8433
Q15021	92	NCAPD2	CND1_HUMAN Condensin complex subunit 1 OS=Homo sapiens OX=9606 GN=NCAPD2 PE=1 SV=3	2.28		1.64	1.79	NA||NA|0.29698	1.90333	0.33471	17.5855
Q14152	257	EIF3A	EIF3A_HUMAN Eukaryotic translation initiation factor 3 subunit A OS=Homo sapiens OX=9606 GN=EIF3A PE=1 SV=1	2.42	2.2	1.17	1.82	NA|0.22517|0.15588|0.31602	1.9025	0.54762	28.7842
P03243	373		E1B55_ADE05 E1B 55 kDa protein OS=Human adenovirus C serotype 5 OX=28285 PE=1 SV=1	2.19	2.19	1.32		NA|NA|NA|	1.9	0.50229	26.4363
P31948	321	STIP1	STIP1_HUMAN Stress-induced-phosphoprotein 1 OS=Homo sapiens OX=9606 GN=STIP1 PE=1 SV=1	2.61	1.73	1.58	1.68	0.06658|NA|0.24377|0.41012	1.9	0.47742	25.1274
P17812	330	CTPS1	PYRG1_HUMAN CTP synthase 1 OS=Homo sapiens OX=9606 GN=CTPS1 PE=1 SV=2		2.37	1.56	1.77	|0.0|0.0|NA	1.9	0.42036	22.1242
Q96IU4	74	ABHD14B	ABHEB_HUMAN Protein ABHD14B OS=Homo sapiens OX=9606 GN=ABHD14B PE=1 SV=1		1.9			|NA||	1.9	NA	#VALUE!
Q14152	541	EIF3A	EIF3A_HUMAN Eukaryotic translation initiation factor 3 subunit A OS=Homo sapiens OX=9606 GN=EIF3A PE=1 SV=1			1.96	1.84	||NA|0.29445	1.9	0.08485	4.46579
P50454	320	SERPINH1	SERPH_HUMAN Serpin H1 OS=Homo sapiens OX=9606 GN=SERPINH1 PE=1 SV=2				1.9	|||NA	1.9	NA	#VALUE!
P62136	248	PPP1CA	PP1A_HUMAN Serine/threonine-protein phosphatase PP1-alpha catalytic subunit OS=Homo sapiens OX=9606 GN=PPP1CA PE=1 SV=1		2.47	1.515	1.71	|0.70692|0.25981|0.45255	1.89833	0.50459	26.5807
O75874	309	IDH1	IDHC_HUMAN Isocitrate dehydrogenase [NADP] cytoplasmic OS=Homo sapiens OX=9606 GN=IDH1 PE=1 SV=2		2.485		1.305	|0.92631||0.17678	1.895	0.83439	44.0311
O95373	982	IPO7	IPO7_HUMAN Importin-7 OS=Homo sapiens OX=9606 GN=IPO7 PE=1 SV=1		2.235	1.81	1.635	|0.28991|NA|0.5869	1.89333	0.30856	16.2972
P07237	231	P4HB	PDIA1_HUMAN Protein disulfide-isomerase OS=Homo sapiens OX=9606 GN=P4HB PE=1 SV=3	1.94	2		1.73	NA|NA||0.5658	1.89	0.14177	7.50106
P11908	250	PRPS2	PRPS2_HUMAN Ribose-phosphate pyrophosphokinase 2 OS=Homo sapiens OX=9606 GN=PRPS2 PE=1 SV=2	1.86	1.65		2.16	0.0|0.41012||0.0	1.89	0.25632	13.5619
Q9Y285	300	FARSA	SYFA_HUMAN Phenylalanine--tRNA ligase alpha subunit OS=Homo sapiens OX=9606 GN=FARSA PE=1 SV=3		1.81	2.12	1.74	|NA|NA|NA	1.89	0.20224	10.7005
Q14697	568	GANAB	GANAB_HUMAN Neutral alpha-glucosidase AB OS=Homo sapiens OX=9606 GN=GANAB PE=1 SV=3		2.33	1.67	1.67	|NA|0.19799|NA	1.89	0.38105	20.1614
O15372	238	EIF3H	EIF3H_HUMAN Eukaryotic translation initiation factor 3 subunit H OS=Homo sapiens OX=9606 GN=EIF3H PE=1 SV=1		2.32		1.46	|NA||NA	1.89	0.60811	32.1751
P21333	2006	FLNA	FLNA_HUMAN Filamin-A OS=Homo sapiens OX=9606 GN=FLNA PE=1 SV=4		1.89			|NA||	1.89	NA	#VALUE!
P49736	282	MCM2	MCM2_HUMAN DNA replication licensing factor MCM2 OS=Homo sapiens OX=9606 GN=MCM2 PE=1 SV=4			1.72	2.06	||NA|NA	1.89	0.24042	12.7206
Q9BXW7	97	HDHD5	HDHD5_HUMAN Haloacid dehalogenase-like hydrolase domain-containing 5 OS=Homo sapiens OX=9606 GN=HDHD5 PE=1 SV=1			1.89		||NA|	1.89	NA	#VALUE!
Q7Z7K6	184	CENPV	CENPV_HUMAN Centromere protein V OS=Homo sapiens OX=9606 GN=CENPV PE=1 SV=1	2.54			1.23	NA|||NA	1.885	0.92631	49.1411
Q7Z7E8	53	UBE2Q1	UB2Q1_HUMAN Ubiquitin-conjugating enzyme E2 Q1 OS=Homo sapiens OX=9606 GN=UBE2Q1 PE=1 SV=1	1.87			1.9	NA|||NA	1.885	0.02121	1.1252
P52948	1786	NUP98	NUP98_HUMAN Nuclear pore complex protein Nup98-Nup96 OS=Homo sapiens OX=9606 GN=NUP98 PE=1 SV=4		2.06		1.71	|NA||NA	1.885	0.24749	13.1294
Q16630	517	CPSF6	CPSF6_HUMAN Cleavage and polyadenylation specificity factor subunit 6 OS=Homo sapiens OX=9606 GN=CPSF6 PE=1 SV=2		1.88			|NA||	1.88	NA	#VALUE!
Q9Y2L1	679	DIS3	RRP44_HUMAN Exosome complex exonuclease RRP44 OS=Homo sapiens OX=9606 GN=DIS3 PE=1 SV=2		2.36	1.67	1.61	|NA|0.0|NA	1.88	0.41677	22.1686
P26196	420	DDX6	DDX6_HUMAN Probable ATP-dependent RNA helicase DDX6 OS=Homo sapiens OX=9606 GN=DDX6 PE=1 SV=2			1.88		||NA|	1.88	NA	#VALUE!
P07954	180	FH	FUMH_HUMAN Fumarate hydratase, mitochondrial OS=Homo sapiens OX=9606 GN=FH PE=1 SV=3				1.88	|||NA	1.88	NA	#VALUE!
P30043	49	BLVRB	BLVRB_HUMAN Flavin reductase (NADPH) OS=Homo sapiens OX=9606 GN=BLVRB PE=1 SV=3				1.88	|||NA	1.88	NA	#VALUE!
Q14669	1220	TRIP12	TRIPC_HUMAN E3 ubiquitin-protein ligase TRIP12 OS=Homo sapiens OX=9606 GN=TRIP12 PE=1 SV=1				1.88	|||NA	1.88	NA	#VALUE!
O43175	524	PHGDH	SERA_HUMAN D-3-phosphoglycerate dehydrogenase OS=Homo sapiens OX=9606 GN=PHGDH PE=1 SV=4	1.745	2.32	1.95	1.5	0.68589|0.27403|0.24263|0.70711	1.87875	0.34695	18.4671
O75643	364	SNRNP200	U520_HUMAN U5 small nuclear ribonucleoprotein 200 kDa helicase OS=Homo sapiens OX=9606 GN=SNRNP200 PE=1 SV=2	1.64		2.11		NA||NA|	1.875	0.33234	17.7248
P09622	140	DLD	DLDH_HUMAN Dihydrolipoyl dehydrogenase, mitochondrial OS=Homo sapiens OX=9606 GN=DLD PE=1 SV=2	1.825	2.14	1.395	2.14	0.12021|NA|0.0495|1.72534	1.875	0.35277	18.8144
Q9NPA8	98	ENY2	ENY2_HUMAN Transcription and mRNA export factor ENY2 OS=Homo sapiens OX=9606 GN=ENY2 PE=1 SV=1				1.875	|||0.91217	1.875	NA	#VALUE!
P35244	120	RPA3	RFA3_HUMAN Replication protein A 14 kDa subunit OS=Homo sapiens OX=9606 GN=RPA3 PE=1 SV=1	1.39	1.57	1.19	3.335	NA|0.31711|0.61849|1.08187	1.87125	0.9881	52.8043
P09651	173	HNRNPA1	ROA1_HUMAN Heterogeneous nuclear ribonucleoprotein A1 OS=Homo sapiens OX=9606 GN=HNRNPA1 PE=1 SV=5	2.22		1.52		NA||NA|	1.87	0.49497	26.469
P22695	172	UQCRC2	QCR2_HUMAN Cytochrome b-c1 complex subunit 2, mitochondrial OS=Homo sapiens OX=9606 GN=UQCRC2 PE=1 SV=3	2.075	1.83	2.285	1.29	0.20506|0.96995|0.61518|0.16653	1.87	0.42905	22.9439
P62826	139	RAN	RAN_HUMAN GTP-binding nuclear protein Ran OS=Homo sapiens OX=9606 GN=RAN PE=1 SV=3		0.48	1.75	3.38	|NA|NA|NA	1.87	1.45372	77.739
P36578	245	RPL4	RL4_HUMAN 60S ribosomal protein L4 OS=Homo sapiens OX=9606 GN=RPL4 PE=1 SV=5			1.84	1.9	||0.71143|NA	1.87	0.04243	2.26898
P40937	37	RFC5	RFC5_HUMAN Replication factor C subunit 5 OS=Homo sapiens OX=9606 GN=RFC5 PE=1 SV=1			1.87		||0.11547|	1.87	NA	#VALUE!
Q8N292	32	GAPT	GAPT_HUMAN Protein GAPT OS=Homo sapiens OX=9606 GN=GAPT PE=1 SV=1				1.87	|||NA	1.87	NA	#VALUE!
P78527	1477	PRKDC	PRKDC_HUMAN DNA-dependent protein kinase catalytic subunit OS=Homo sapiens OX=9606 GN=PRKDC PE=1 SV=3				1.87	|||NA	1.87	NA	#VALUE!
P04908	124	H2AC4	H2A1B_HUMAN Histone H2A type 1-B/E OS=Homo sapiens OX=9606 GN=H2AC4 PE=1 SV=2	1.76	1.975			0.01414|0.0495||	1.8675	0.15203	8.14083
P20700	253	LMNB1	LMNB1_HUMAN Lamin-B1 OS=Homo sapiens OX=9606 GN=LMNB1 PE=1 SV=2		2.38	1.355		|NA|0.24749|	1.8675	0.72478	38.8102
Q14566	509	MCM6	MCM6_HUMAN DNA replication licensing factor MCM6 OS=Homo sapiens OX=9606 GN=MCM6 PE=1 SV=1	1.5	2.44		1.66	0.35355|NA||0.52936	1.86667	0.50292	26.9421
Q00610	229	CLTC	CLH1_HUMAN Clathrin heavy chain 1 OS=Homo sapiens OX=9606 GN=CLTC PE=1 SV=5	2.57		1.68	1.35	1.01385||0.71757|0.4857	1.86667	0.63106	33.8067
P22392	51	NME2	NDKB_HUMAN Nucleoside diphosphate kinase B OS=Homo sapiens OX=9606 GN=NME2 PE=1 SV=1	2.165	2.21	1.56	1.53	0.18019|0.29738|0.10105|0.14858	1.86625	0.3716	19.9116
O43707	591	ACTN4	ACTN4_HUMAN Alpha-actinin-4 OS=Homo sapiens OX=9606 GN=ACTN4 PE=1 SV=2	1.1	2.75	1.92	1.695	NA|0.01732|0.73614|1.15258	1.86625	0.68322	36.6092
P43490	191	NAMPT	NAMPT_HUMAN Nicotinamide phosphoribosyltransferase OS=Homo sapiens OX=9606 GN=NAMPT PE=1 SV=1	2.21		1.82	1.565	NA||NA|0.67175	1.865	0.32485	17.4182
O00410	540	IPO5	IPO5_HUMAN Importin-5 OS=Homo sapiens OX=9606 GN=IPO5 PE=1 SV=4		2.62	1.47	1.5	|0.35355|0.49571|1.00409	1.86333	0.65546	35.1768
P06280	302	GLA	AGAL_HUMAN Alpha-galactosidase A OS=Homo sapiens OX=9606 GN=GLA PE=1 SV=1	2.05		1.67		0.0||0.12728|	1.86	0.2687	14.4462
P49327	1251	FASN	FAS_HUMAN Fatty acid synthase OS=Homo sapiens OX=9606 GN=FASN PE=1 SV=3	1.86				NA|||	1.86	NA	#VALUE!
P34949	178	MPI	MPI_HUMAN Mannose-6-phosphate isomerase OS=Homo sapiens OX=9606 GN=MPI PE=1 SV=2	3.4	0.9	1.28		NA|0.0|0.0|	1.86	1.34715	72.4274
Q9UQ80	299	PA2G4	PA2G4_HUMAN Proliferation-associated protein 2G4 OS=Homo sapiens OX=9606 GN=PA2G4 PE=1 SV=3	1.92	1.7	1.77	2.05	0.22627|0.17474|0.52405|0.25491	1.86	0.15642	8.40968
P36542	91	ATP5F1C	ATPG_HUMAN ATP synthase subunit gamma, mitochondrial OS=Homo sapiens OX=9606 GN=ATP5F1C PE=1 SV=1			1.86		||NA|	1.86	NA	#VALUE!
P62333	300	PSMC6	PRS10_HUMAN 26S proteasome regulatory subunit 10B OS=Homo sapiens OX=9606 GN=PSMC6 PE=1 SV=1				1.86	|||NA	1.86	NA	#VALUE!
P61160	206	ACTR2	ARP2_HUMAN Actin-related protein 2 OS=Homo sapiens OX=9606 GN=ACTR2 PE=1 SV=1		2.51	1.32	1.74	|NA|NA|0.34064	1.85667	0.60352	32.5055
P09874	62	PARP1	PARP1_HUMAN Poly [ADP-ribose] polymerase 1 OS=Homo sapiens OX=9606 GN=PARP1 PE=1 SV=4		2.61		1.1	|0.94108||NA	1.855	1.06773	57.5596
Q96CS3	151	FAF2	FAF2_HUMAN FAS-associated factor 2 OS=Homo sapiens OX=9606 GN=FAF2 PE=1 SV=2			1.31	2.4	||NA|0.0	1.855	0.77075	41.5499
O76003	104	GLRX3	GLRX3_HUMAN Glutaredoxin-3 OS=Homo sapiens OX=9606 GN=GLRX3 PE=1 SV=2	1.42	2.645	1.47	1.88	NA|0.64347|1.02599|NA	1.85375	0.56632	30.55
Q86UP2	511	KTN1	KTN1_HUMAN Kinectin OS=Homo sapiens OX=9606 GN=KTN1 PE=1 SV=1	3.56		0.93	1.07	2.6163||NA|NA	1.85333	1.47967	79.8385
P41252	78	IARS1	SYIC_HUMAN Isoleucine--tRNA ligase, cytoplasmic OS=Homo sapiens OX=9606 GN=IARS1 PE=1 SV=2	1.66	2.25	1.57	1.93	NA|0.80984|NA|0.50964	1.8525	0.30598	16.5171
P42704	634	LRPPRC	LPPRC_HUMAN Leucine-rich PPR motif-containing protein, mitochondrial OS=Homo sapiens OX=9606 GN=LRPPRC PE=1 SV=3	0.56	2.275	2	2.57	NA|1.6617|NA|0.66714	1.85125	0.89174	48.1696
P78406	342	RAE1	RAE1L_HUMAN mRNA export factor OS=Homo sapiens OX=9606 GN=RAE1 PE=1 SV=1	2.13		1.65	1.77	NA||NA|NA	1.85	0.2498	13.5027
Q6P2Q9	610	PRPF8	PRP8_HUMAN Pre-mRNA-processing-splicing factor 8 OS=Homo sapiens OX=9606 GN=PRPF8 PE=1 SV=2	2.75			0.95	NA|||NA	1.85	1.27279	68.7995
P11908	315	PRPS2	PRPS2_HUMAN Ribose-phosphate pyrophosphokinase 2 OS=Homo sapiens OX=9606 GN=PRPS2 PE=1 SV=2	2.83	0.87			NA|NA||	1.85	1.38593	74.9151
P22314	548	UBA1	UBA1_HUMAN Ubiquitin-like modifier-activating enzyme 1 OS=Homo sapiens OX=9606 GN=UBA1 PE=1 SV=3		1.3	2.4		|NA|0.28284|	1.85	0.77782	42.0443
Q16891	359	IMMT	MIC60_HUMAN MICOS complex subunit MIC60 OS=Homo sapiens OX=9606 GN=IMMT PE=1 SV=1			1.97	1.73	||0.09899|NA	1.85	0.16971	9.17351
P51991	26	HNRNPA3	ROA3_HUMAN Heterogeneous nuclear ribonucleoprotein A3 OS=Homo sapiens OX=9606 GN=HNRNPA3 PE=1 SV=2				1.85	|||NA	1.85	NA	#VALUE!
Q96ME7	305	ZNF512	ZN512_HUMAN Zinc finger protein 512 OS=Homo sapiens OX=9606 GN=ZNF512 PE=1 SV=2				1.85	|||NA	1.85	NA	#VALUE!
P52209	453	PGD	6PGD_HUMAN 6-phosphogluconate dehydrogenase, decarboxylating OS=Homo sapiens OX=9606 GN=PGD PE=1 SV=3	1.55	1.93	1.84	2.07	0.28284|0.44287|0.08021|0.28284	1.8475	0.21975	11.8945
P54136	86	RARS1	SYRC_HUMAN Arginine--tRNA ligase, cytoplasmic OS=Homo sapiens OX=9606 GN=RARS1 PE=1 SV=2		2.56	1.13		|1.19747|NA|	1.845	1.01116	54.8054
P04406	57	GAPDH	G3P_HUMAN Glyceraldehyde-3-phosphate dehydrogenase OS=Homo sapiens OX=9606 GN=GAPDH PE=1 SV=3	2.18	1.04	1.845	2.31	0.16197|0.0|0.65761|NA	1.84375	0.57052	30.9435
P53396	47	ACLY	ACLY_HUMAN ATP-citrate synthase OS=Homo sapiens OX=9606 GN=ACLY PE=1 SV=3		1.985	1.825	1.715	|0.92335|0.38891|0.61728	1.84167	0.13577	7.37211
Q9BW92	247	TARS2	SYTM_HUMAN Threonine--tRNA ligase, mitochondrial OS=Homo sapiens OX=9606 GN=TARS2 PE=1 SV=1	1.84				NA|||	1.84	NA	#VALUE!
Q9BWJ5	8	SF3B5	SF3B5_HUMAN Splicing factor 3B subunit 5 OS=Homo sapiens OX=9606 GN=SF3B5 PE=1 SV=1	2.59		1.51	1.42	0.70711||NA|NA	1.84	0.65108	35.3848
P41252	505	IARS1	SYIC_HUMAN Isoleucine--tRNA ligase, cytoplasmic OS=Homo sapiens OX=9606 GN=IARS1 PE=1 SV=2	0.85	3.005	1.36	2.145	NA|1.25271|0.05814|0.41387	1.84	0.94176	51.1826
Q14694	407	USP10	UBP10_HUMAN Ubiquitin carboxyl-terminal hydrolase 10 OS=Homo sapiens OX=9606 GN=USP10 PE=1 SV=2	1.84				NA|||	1.84	NA	#VALUE!
Q92922	95	SMARCC1	SMRC1_HUMAN SWI/SNF complex subunit SMARCC1 OS=Homo sapiens OX=9606 GN=SMARCC1 PE=1 SV=3		1.36	2.33	1.83	|NA|NA|0.41146	1.84	0.48508	26.363
P51659	120	HSD17B4	DHB4_HUMAN Peroxisomal multifunctional enzyme type 2 OS=Homo sapiens OX=9606 GN=HSD17B4 PE=1 SV=3		2.28	1.48	1.76	|NA|0.55221|0.46669	1.84	0.40596	22.063
Q16891	493	IMMT	MIC60_HUMAN MICOS complex subunit MIC60 OS=Homo sapiens OX=9606 GN=IMMT PE=1 SV=1			1.84		||NA|	1.84	NA	#VALUE!
P62826	105	RAN	RAN_HUMAN GTP-binding nuclear protein Ran OS=Homo sapiens OX=9606 GN=RAN PE=1 SV=3			2.02	1.66	||NA|NA	1.84	0.25456	13.8348
Q14684	408	RRP1B	RRP1B_HUMAN Ribosomal RNA processing protein 1 homolog B OS=Homo sapiens OX=9606 GN=RRP1B PE=1 SV=3			1.84		||NA|	1.84	NA	#VALUE!
Q15022	112	SUZ12	SUZ12_HUMAN Polycomb protein SUZ12 OS=Homo sapiens OX=9606 GN=SUZ12 PE=1 SV=3			1.84		||NA|	1.84	NA	#VALUE!
Q53GS9	521	USP39	SNUT2_HUMAN U4/U6.U5 tri-snRNP-associated protein 2 OS=Homo sapiens OX=9606 GN=USP39 PE=1 SV=2				1.84	|||NA	1.84	NA	#VALUE!
P00918	15	CA2	CAH2_HUMAN Carbonic anhydrase 2 OS=Homo sapiens OX=9606 GN=CA2 PE=1 SV=2	2.05		1.38	2.085	NA||NA|0.00707	1.83833	0.39731	21.6126
P18669	91	PGAM1	PGAM1_HUMAN Phosphoglycerate mutase 1 OS=Homo sapiens OX=9606 GN=PGAM1 PE=1 SV=2		2.2	0.72	2.595	|0.76629|NA|0.78489	1.83833	0.98844	53.7684
Q15029	491	EFTUD2	U5S1_HUMAN 116 kDa U5 small nuclear ribonucleoprotein component OS=Homo sapiens OX=9606 GN=EFTUD2 PE=1 SV=1	2.02	2.06	1.365	1.9	0.34641|NA|0.36373|0.14154	1.83625	0.32144	17.5052
Q9NPD3	209	EXOSC4	EXOS4_HUMAN Exosome complex component RRP41 OS=Homo sapiens OX=9606 GN=EXOSC4 PE=1 SV=3		2.9	0.77		|NA|NA|	1.835	1.50614	82.0785
P02545	252	LMNA	LMNA_HUMAN Prelamin-A/C OS=Homo sapiens OX=9606 GN=LMNA PE=1 SV=1	2.55	2	1.35	1.43	0.47353|0.10263|0.07981|0.14142	1.8325	0.55907	30.5086
O43707	530	ACTN4	ACTN4_HUMAN Alpha-actinin-4 OS=Homo sapiens OX=9606 GN=ACTN4 PE=1 SV=2			1.235	2.43	||0.43134|NA	1.8325	0.84499	46.1113
Q92841	232	DDX17	DDX17_HUMAN Probable ATP-dependent RNA helicase DDX17 OS=Homo sapiens OX=9606 GN=DDX17 PE=1 SV=2	1.83				NA|||	1.83	NA	#VALUE!
O43172	461	PRPF4	PRP4_HUMAN U4/U6 small nuclear ribonucleoprotein Prp4 OS=Homo sapiens OX=9606 GN=PRPF4 PE=1 SV=2		1.83			|NA||	1.83	NA	#VALUE!
P49327	1098	FASN	FAS_HUMAN Fatty acid synthase OS=Homo sapiens OX=9606 GN=FASN PE=1 SV=3				1.83	|||NA	1.83	NA	#VALUE!
P62750	73	RPL23A	RL23A_HUMAN 60S ribosomal protein L23a OS=Homo sapiens OX=9606 GN=RPL23A PE=1 SV=1				1.83	|||0.82343	1.83	NA	#VALUE!
Q92499	704	DDX1	DDX1_HUMAN ATP-dependent RNA helicase DDX1 OS=Homo sapiens OX=9606 GN=DDX1 PE=1 SV=2		1.635	1.76	2.09	|0.17678|NA|NA	1.82833	0.23507	12.8571
P23526	162	AHCY	SAHH_HUMAN Adenosylhomocysteinase OS=Homo sapiens OX=9606 GN=AHCY PE=1 SV=4	1.65	3	1.44	1.22	1.36898|1.7027|NA|0.29676	1.8275	0.80114	43.838
Q9GZT3	44	SLIRP	SLIRP_HUMAN SRA stem-loop-interacting RNA-binding protein, mitochondrial OS=Homo sapiens OX=9606 GN=SLIRP PE=1 SV=1	2.29		1.36		0.0||0.02828|	1.825	0.65761	36.0334
P46459	34	NSF	NSF_HUMAN Vesicle-fusing ATPase OS=Homo sapiens OX=9606 GN=NSF PE=1 SV=3	1.54	2.11			NA|NA||	1.825	0.40305	22.0849
Q99832	258	CCT7	TCPH_HUMAN T-complex protein 1 subunit eta OS=Homo sapiens OX=9606 GN=CCT7 PE=1 SV=2	2.18			1.47	NA|||0.0	1.825	0.50205	27.5096
Q06210	221	GFPT1	GFPT1_HUMAN Glutamine--fructose-6-phosphate aminotransferase [isomerizing] 1 OS=Homo sapiens OX=9606 GN=GFPT1 PE=1 SV=3			1.95	1.7	||NA|NA	1.825	0.17678	9.68658
P54886	391	ALDH18A1	P5CS_HUMAN Delta-1-pyrroline-5-carboxylate synthase OS=Homo sapiens OX=9606 GN=ALDH18A1 PE=1 SV=2			1.83	1.82	||0.32874|NA	1.825	0.00707	0.387397
P30101	186	PDIA3	PDIA3_HUMAN Protein disulfide-isomerase A3 OS=Homo sapiens OX=9606 GN=PDIA3 PE=1 SV=4	1.09	2.565		1.81	0.0|1.97283||0.41789	1.82167	0.73757	40.4887
O00303	95	EIF3F	EIF3F_HUMAN Eukaryotic translation initiation factor 3 subunit F OS=Homo sapiens OX=9606 GN=EIF3F PE=1 SV=1	1.325	1.39	3.23	1.34	0.74246|0.50912|NA|0.09899	1.82125	0.93958	51.5898
Q09028	373	RBBP4	RBBP4_HUMAN Histone-binding protein RBBP4 OS=Homo sapiens OX=9606 GN=RBBP4 PE=1 SV=3	1.82				NA|||	1.82	NA	#VALUE!
P40926	60	MDH2	MDHM_HUMAN Malate dehydrogenase, mitochondrial OS=Homo sapiens OX=9606 GN=MDH2 PE=1 SV=3	1.81		1.83		0.77782||NA|	1.82	0.01414	0.776923
Q9NYF8	293	BCLAF1	BCLF1_HUMAN Bcl-2-associated transcription factor 1 OS=Homo sapiens OX=9606 GN=BCLAF1 PE=1 SV=2		1.82			|NA||	1.82	NA	#VALUE!
P27708	584	CAD	PYR1_HUMAN CAD protein OS=Homo sapiens OX=9606 GN=CAD PE=1 SV=3		2.46	1.56	1.44	|NA|NA|NA	1.82	0.55749	30.6313
Q9UIC8	75	LCMT1	LCMT1_HUMAN Leucine carboxyl methyltransferase 1 OS=Homo sapiens OX=9606 GN=LCMT1 PE=1 SV=2				1.82	|||NA	1.82	NA	#VALUE!
Q9Y4L1	542	HYOU1	HYOU1_HUMAN Hypoxia up-regulated protein 1 OS=Homo sapiens OX=9606 GN=HYOU1 PE=1 SV=1				1.82	|||NA	1.82	NA	#VALUE!
P26358	1460	DNMT1	DNMT1_HUMAN DNA (cytosine-5)-methyltransferase 1 OS=Homo sapiens OX=9606 GN=DNMT1 PE=1 SV=2	1.265	1.23	2.96		0.14849|NA|NA|	1.81833	0.98887	54.3834
P54886	777	ALDH18A1	P5CS_HUMAN Delta-1-pyrroline-5-carboxylate synthase OS=Homo sapiens OX=9606 GN=ALDH18A1 PE=1 SV=2	1.705	2.55	1.505	1.51	0.77075|NA|0.532|0.28906	1.8175	0.49713	27.3524
P42704	1096	LRPPRC	LPPRC_HUMAN Leucine-rich PPR motif-containing protein, mitochondrial OS=Homo sapiens OX=9606 GN=LRPPRC PE=1 SV=3	2.72	1.34	2.48	0.73	NA|NA|0.74478|NA	1.8175	0.94235	51.8487
P36578	60	RPL4	RL4_HUMAN 60S ribosomal protein L4 OS=Homo sapiens OX=9606 GN=RPL4 PE=1 SV=5	3.61	0.87	0.79	2	0.0|NA|NA|0.38505	1.8175	1.31655	72.4374
P12277	234	CKB	KCRB_HUMAN Creatine kinase B-type OS=Homo sapiens OX=9606 GN=CKB PE=1 SV=1	2.27	1.235	1.185	2.58	0.0|0.61518|0.23335|NA	1.8175	0.7131	39.2352
Q15075	361	EEA1	EEA1_HUMAN Early endosome antigen 1 OS=Homo sapiens OX=9606 GN=EEA1 PE=1 SV=2	2.46		1.22	1.77	1.14146||0.37859|0.57726	1.81667	0.62132	34.201
P51571	138	SSR4	SSRD_HUMAN Translocon-associated protein subunit delta OS=Homo sapiens OX=9606 GN=SSR4 PE=1 SV=1		2.78	1.24	1.43	|0.0|NA|0.24042	1.81667	0.83966	46.2197
Q9Y2W1	788	THRAP3	TR150_HUMAN Thyroid hormone receptor-associated protein 3 OS=Homo sapiens OX=9606 GN=THRAP3 PE=1 SV=2	2.43	1.2			0.73539|NA||	1.815	0.86974	47.9196
P39656	313	DDOST	OST48_HUMAN Dolichyl-diphosphooligosaccharide--protein glycosyltransferase 48 kDa subunit OS=Homo sapiens OX=9606 GN=DDOST PE=1 SV=4	2.06			1.57	NA|||0.49497	1.815	0.34648	19.0898
P32322	240	PYCR1	P5CR1_HUMAN Pyrroline-5-carboxylate reductase 1, mitochondrial OS=Homo sapiens OX=9606 GN=PYCR1 PE=1 SV=2	3.06	0.57			NA|NA||	1.815	1.7607	97.0083
P40937	55	RFC5	RFC5_HUMAN Replication factor C subunit 5 OS=Homo sapiens OX=9606 GN=RFC5 PE=1 SV=1			1.46	2.17	||1.04652|1.48492	1.815	0.50205	27.6612
Q9BWF3	61	RBM4	RBM4_HUMAN RNA-binding protein 4 OS=Homo sapiens OX=9606 GN=RBM4 PE=1 SV=1	1.56	2.44	1.505	1.74	0.28885|0.50633|0.58414|0.58643	1.81125	0.43101	23.7963
P00491	135	PNP	PNPH_HUMAN Purine nucleoside phosphorylase OS=Homo sapiens OX=9606 GN=PNP PE=1 SV=2	1.81				NA|||	1.81	NA	#VALUE!
O14654	360	IRS4	IRS4_HUMAN Insulin receptor substrate 4 OS=Homo sapiens OX=9606 GN=IRS4 PE=1 SV=1			1.81		||NA|	1.81	NA	#VALUE!
P23246	247	SFPQ	SFPQ_HUMAN Splicing factor, proline- and glutamine-rich OS=Homo sapiens OX=9606 GN=SFPQ PE=1 SV=2				1.81	|||NA	1.81	NA	#VALUE!
Q15181	45	PPA1	IPYR_HUMAN Inorganic pyrophosphatase OS=Homo sapiens OX=9606 GN=PPA1 PE=1 SV=2	2.72		1.255	1.45	NA||0.46492|0.42572	1.80833	0.79552	43.992
P22695	178	UQCRC2	QCR2_HUMAN Cytochrome b-c1 complex subunit 2, mitochondrial OS=Homo sapiens OX=9606 GN=UQCRC2 PE=1 SV=3	0.94	2.58	1.65	2.06	NA|0.0|0.48014|NA	1.8075	0.69231	38.3021
P49327	2408	FASN	FAS_HUMAN Fatty acid synthase OS=Homo sapiens OX=9606 GN=FASN PE=1 SV=3	2.21		1.64	1.57	NA||NA|NA	1.80667	0.35105	19.4308
P50991	129	CCT4	TCPD_HUMAN T-complex protein 1 subunit delta OS=Homo sapiens OX=9606 GN=CCT4 PE=1 SV=4	2.54	1.89	1.24	1.555	0.0|1.01995|0.2497|0.35547	1.80625	0.55653	30.8113
Q9BXP5	202	SRRT	SRRT_HUMAN Serrate RNA effector molecule homolog OS=Homo sapiens OX=9606 GN=SRRT PE=1 SV=1	1.86			1.75	NA|||NA	1.805	0.07778	4.30914
O43491	604	EPB41L2	E41L2_HUMAN Band 4.1-like protein 2 OS=Homo sapiens OX=9606 GN=EPB41L2 PE=1 SV=1	1.73	1.88			NA|1.20208||	1.805	0.10607	5.87645
P39023	55	RPL3	RL3_HUMAN 60S ribosomal protein L3 OS=Homo sapiens OX=9606 GN=RPL3 PE=1 SV=2		1.52		2.08	|NA||NA	1.8	0.39598	21.9989
Q14204	1559	DYNC1H1	DYHC1_HUMAN Cytoplasmic dynein 1 heavy chain 1 OS=Homo sapiens OX=9606 GN=DYNC1H1 PE=1 SV=5	3.42	1.13	1.615	1.03	1.36329|NA|0.77075|0.38101	1.79875	1.11062	61.744
Q8NI27	63	THOC2	THOC2_HUMAN THO complex subunit 2 OS=Homo sapiens OX=9606 GN=THOC2 PE=1 SV=2	3.29	1.13	1.77	1	NA|NA|NA|NA	1.7975	1.05038	58.4356
P39748	208	FEN1	FEN1_HUMAN Flap endonuclease 1 OS=Homo sapiens OX=9606 GN=FEN1 PE=1 SV=1		1.35	1.94	2.1	|0.60811|0.25456|NA	1.79667	0.39501	21.9857
P47897	82	QARS1	SYQ_HUMAN Glutamine--tRNA ligase OS=Homo sapiens OX=9606 GN=QARS1 PE=1 SV=1		1.54	1.56	2.29	|NA|NA|NA	1.79667	0.42736	23.7862
P14618	78	PKM	KPYM_HUMAN Pyruvate kinase PKM OS=Homo sapiens OX=9606 GN=PKM PE=1 SV=4	2.26	2.03	1.23	1.655	NA|0.56079|0.53135|0.16609	1.79375	0.45102	25.144
Q06124	287	PTPN11	PTN11_HUMAN Tyrosine-protein phosphatase non-receptor type 11 OS=Homo sapiens OX=9606 GN=PTPN11 PE=1 SV=3	1.34	2.89		1.15	0.4272|NA||0.18385	1.79333	0.95448	53.2239
P27635	95	RPL10	RL10_HUMAN 60S ribosomal protein L10 OS=Homo sapiens OX=9606 GN=RPL10 PE=1 SV=4	1.83	0.87	1.99	2.48	NA|NA|0.53137|1.62814	1.7925	0.67431	37.6184
P31943	374	HNRNPH1	HNRH1_HUMAN Heterogeneous nuclear ribonucleoprotein H OS=Homo sapiens OX=9606 GN=HNRNPH1 PE=1 SV=4	1.555	1.815	2.005	1.795	0.16263|0.45962|0.34823|0.60305	1.7925	0.18446	10.2907
P04075	362	ALDOA	ALDOA_HUMAN Fructose-bisphosphate aldolase A OS=Homo sapiens OX=9606 GN=ALDOA PE=1 SV=2	1.09	1.33	2.43	2.315	NA|0.95259|NA|0.51619	1.79125	0.67991	37.9573
Q15021	372	NCAPD2	CND1_HUMAN Condensin complex subunit 1 OS=Homo sapiens OX=9606 GN=NCAPD2 PE=1 SV=3	1.79				NA|||	1.79	NA	#VALUE!
Q15021	225	NCAPD2	CND1_HUMAN Condensin complex subunit 1 OS=Homo sapiens OX=9606 GN=NCAPD2 PE=1 SV=3	1.485	2.015	1.87		0.43134|0.41719|NA|	1.79	0.27391	15.3022
Q29RF7	336	PDS5A	PDS5A_HUMAN Sister chromatid cohesion protein PDS5 homolog A OS=Homo sapiens OX=9606 GN=PDS5A PE=1 SV=1			1.79		||NA|	1.79	NA	#VALUE!
P31939	181	ATIC	PUR9_HUMAN Bifunctional purine biosynthesis protein ATIC OS=Homo sapiens OX=9606 GN=ATIC PE=1 SV=3			1.79		||NA|	1.79	NA	#VALUE!
P48735	173	IDH2	IDHP_HUMAN Isocitrate dehydrogenase [NADP], mitochondrial OS=Homo sapiens OX=9606 GN=IDH2 PE=1 SV=2				1.79	|||NA	1.79	NA	#VALUE!
P17844	427	DDX5	DDX5_HUMAN Probable ATP-dependent RNA helicase DDX5 OS=Homo sapiens OX=9606 GN=DDX5 PE=1 SV=1		2.15	2.095	1.12	|NA|0.26163|NA	1.78833	0.57945	32.4017
Q13895	410	BYSL	BYST_HUMAN Bystin OS=Homo sapiens OX=9606 GN=BYSL PE=1 SV=3			2.06	1.515	||NA|0.57276	1.7875	0.38537	21.5592
P56192	340	MARS1	SYMC_HUMAN Methionine--tRNA ligase, cytoplasmic OS=Homo sapiens OX=9606 GN=MARS1 PE=1 SV=2		2.04	1.685	1.63	|0.2687|0.91217|NA	1.785	0.22254	12.4672
Q13885	105	TUBB2A	TBB2A_HUMAN Tubulin beta-2A chain OS=Homo sapiens OX=9606 GN=TUBB2A PE=1 SV=1			1.95	1.62	||0.30826|0.37141	1.785	0.23335	13.0728
P23246	248	SFPQ	SFPQ_HUMAN Splicing factor, proline- and glutamine-rich OS=Homo sapiens OX=9606 GN=SFPQ PE=1 SV=2			1.785		||0.57276|	1.785	NA	#VALUE!
Q9H9B4	52	SFXN1	SFXN1_HUMAN Sideroflexin-1 OS=Homo sapiens OX=9606 GN=SFXN1 PE=1 SV=4				1.785	|||0.34648	1.785	NA	#VALUE!
Q9UII2	74	ATP5IF1	ATIF1_HUMAN ATPase inhibitor, mitochondrial OS=Homo sapiens OX=9606 GN=ATP5IF1 PE=1 SV=1	2.06	2.09	1.64	1.33	NA|NA|0.17328|0.24042	1.78	0.36359	20.4264
Q99613	715	EIF3C	EIF3C_HUMAN Eukaryotic translation initiation factor 3 subunit C OS=Homo sapiens OX=9606 GN=EIF3C PE=1 SV=1	1.78				NA|||	1.78	NA	#VALUE!
Q15437	224	SEC23B	SC23B_HUMAN Protein transport protein Sec23B OS=Homo sapiens OX=9606 GN=SEC23B PE=1 SV=2	1.78				NA|||	1.78	NA	#VALUE!
P14735	885	IDE	IDE_HUMAN Insulin-degrading enzyme OS=Homo sapiens OX=9606 GN=IDE PE=1 SV=4	1.78				NA|||	1.78	NA	#VALUE!
P21127	572	CDK11B	CD11B_HUMAN Cyclin-dependent kinase 11B OS=Homo sapiens OX=9606 GN=CDK11B PE=1 SV=4			1.78		||NA|	1.78	NA	#VALUE!
P45974	425	USP5	UBP5_HUMAN Ubiquitin carboxyl-terminal hydrolase 5 OS=Homo sapiens OX=9606 GN=USP5 PE=1 SV=2				1.78	|||NA	1.78	NA	#VALUE!
Q9NVP1	525	DDX18	DDX18_HUMAN ATP-dependent RNA helicase DDX18 OS=Homo sapiens OX=9606 GN=DDX18 PE=1 SV=2				1.78	|||NA	1.78	NA	#VALUE!
Q92499	443	DDX1	DDX1_HUMAN ATP-dependent RNA helicase DDX1 OS=Homo sapiens OX=9606 GN=DDX1 PE=1 SV=2	1.795	2.255	1.28		0.53033|0.7566|NA|	1.77667	0.48776	27.4536
O14654	408	IRS4	IRS4_HUMAN Insulin receptor substrate 4 OS=Homo sapiens OX=9606 GN=IRS4 PE=1 SV=1	2	1.84	1.23	2.03	NA|0.55154|0.08485|0.46669	1.775	0.37278	21.0017
P04080	58	CSTB	CYTB_HUMAN Cystatin-B OS=Homo sapiens OX=9606 GN=CSTB PE=1 SV=2			2.25	1.3	||NA|NA	1.775	0.67175	37.8451
P04075	21	ALDOA	ALDOA_HUMAN Fructose-bisphosphate aldolase A OS=Homo sapiens OX=9606 GN=ALDOA PE=1 SV=2	1.25		2.08	1.98	NA||0.0383|NA	1.77	0.4531	25.5989
P62249	77	RPS16	RS16_HUMAN 40S ribosomal protein S16 OS=Homo sapiens OX=9606 GN=RPS16 PE=1 SV=2	1.06	2.48			NA|NA||	1.77	1.00409	56.7282
Q92922	737	SMARCC1	SMRC1_HUMAN SWI/SNF complex subunit SMARCC1 OS=Homo sapiens OX=9606 GN=SMARCC1 PE=1 SV=3	1.19	2.35			0.72295|NA||	1.77	0.82024	46.3412
P30153	117	PPP2R1A	2AAA_HUMAN Serine/threonine-protein phosphatase 2A 65 kDa regulatory subunit A alpha isoform OS=Homo sapiens OX=9606 GN=PPP2R1A PE=1 SV=4		2.22	1.58	1.51	|0.39345|NA|NA	1.77	0.39128	22.1062
Q9H0C8	260	ILKAP	ILKAP_HUMAN Integrin-linked kinase-associated serine/threonine phosphatase 2C OS=Homo sapiens OX=9606 GN=ILKAP PE=1 SV=1			1.77		||NA|	1.77	NA	#VALUE!
P14635	304	CCNB1	CCNB1_HUMAN G2/mitotic-specific cyclin-B1 OS=Homo sapiens OX=9606 GN=CCNB1 PE=1 SV=1			1.77		||0.45255|	1.77	NA	#VALUE!
P53611	23	RABGGTB	PGTB2_HUMAN Geranylgeranyl transferase type-2 subunit beta OS=Homo sapiens OX=9606 GN=RABGGTB PE=1 SV=2				1.77	|||NA	1.77	NA	#VALUE!
O43660	11	PLRG1	PLRG1_HUMAN Pleiotropic regulator 1 OS=Homo sapiens OX=9606 GN=PLRG1 PE=1 SV=1				1.77	|||NA	1.77	NA	#VALUE!
O75131	166	CPNE3	CPNE3_HUMAN Copine-3 OS=Homo sapiens OX=9606 GN=CPNE3 PE=1 SV=1	1.615	2.58	1.11		1.23744|NA|0.3581|	1.76833	0.7469	42.2376
P49591	308	SARS1	SYSC_HUMAN Serine--tRNA ligase, cytoplasmic OS=Homo sapiens OX=9606 GN=SARS1 PE=1 SV=3	2.2			1.33	0.59397|||NA	1.765	0.61518	34.8544
P04181	53	OAT	OAT_HUMAN Ornithine aminotransferase, mitochondrial OS=Homo sapiens OX=9606 GN=OAT PE=1 SV=1	1.14	2.39			0.06928|NA||	1.765	0.88388	50.0782
Q07065	395	CKAP4	CKAP4_HUMAN Cytoskeleton-associated protein 4 OS=Homo sapiens OX=9606 GN=CKAP4 PE=1 SV=2		2.635	1.21	1.45	|1.15258|0.21992|0.24114	1.765	0.76294	43.2261
P31939	267	ATIC	PUR9_HUMAN Bifunctional purine biosynthesis protein ATIC OS=Homo sapiens OX=9606 GN=ATIC PE=1 SV=3		2.315	1.15	1.83	|0.91217|0.52501|NA	1.765	0.58521	33.1564
P08758	267	ANXA5	ANXA5_HUMAN Annexin A5 OS=Homo sapiens OX=9606 GN=ANXA5 PE=1 SV=2	2.15		1.7	1.44	NA||0.68501|0.46669	1.76333	0.35921	20.3711
Q14103	245	HNRNPD	HNRPD_HUMAN Heterogeneous nuclear ribonucleoprotein D0 OS=Homo sapiens OX=9606 GN=HNRNPD PE=1 SV=1	2.11	2.05	1.12		0.0|0.39598|1.02768|	1.76	0.55507	31.5381
Q15021	213	NCAPD2	CND1_HUMAN Condensin complex subunit 1 OS=Homo sapiens OX=9606 GN=NCAPD2 PE=1 SV=3	1.76				NA|||	1.76	NA	#VALUE!
Q7Z6Z7	2614	HUWE1	HUWE1_HUMAN E3 ubiquitin-protein ligase HUWE1 OS=Homo sapiens OX=9606 GN=HUWE1 PE=1 SV=3		2.48		1.04	|NA||NA	1.76	1.01823	57.854
Q8IXT5	946	RBM12B	RB12B_HUMAN RNA-binding protein 12B OS=Homo sapiens OX=9606 GN=RBM12B PE=1 SV=2			1.76		||NA|	1.76	NA	#VALUE!
Q9P2E9	873	RRBP1	RRBP1_HUMAN Ribosome-binding protein 1 OS=Homo sapiens OX=9606 GN=RRBP1 PE=1 SV=5			1.76		||0.0|	1.76	NA	#VALUE!
Q9P0J0	112	NDUFA13	NDUAD_HUMAN NADH dehydrogenase [ubiquinone] 1 alpha subcomplex subunit 13 OS=Homo sapiens OX=9606 GN=NDUFA13 PE=1 SV=3			1.78	1.74	||NA|NA	1.76	0.02828	1.60682
Q9HCK8	304	CHD8	CHD8_HUMAN Chromodomain-helicase-DNA-binding protein 8 OS=Homo sapiens OX=9606 GN=CHD8 PE=1 SV=5			1.76		||NA|	1.76	NA	#VALUE!
P14618	81	PKM	KPYM_HUMAN Pyruvate kinase PKM OS=Homo sapiens OX=9606 GN=PKM PE=1 SV=4	2.02	1.785	1.59	1.625	0.10504|0.50087|0.16802|0.24478	1.755	0.196	11.1681
Q8NC51	212	SERBP1	PAIRB_HUMAN Plasminogen activator inhibitor 1 RNA-binding protein OS=Homo sapiens OX=9606 GN=SERBP1 PE=1 SV=2		1.87		1.64	|NA||NA	1.755	0.16263	9.26667
P22626	127	HNRNPA2B1	ROA2_HUMAN Heterogeneous nuclear ribonucleoproteins A2/B1 OS=Homo sapiens OX=9606 GN=HNRNPA2B1 PE=1 SV=2			1.71	1.8	||0.35539|NA	1.755	0.06364	3.62621
P09651	120	HNRNPA1	ROA1_HUMAN Heterogeneous nuclear ribonucleoprotein A1 OS=Homo sapiens OX=9606 GN=HNRNPA1 PE=1 SV=5			1.71	1.8	||0.35539|NA	1.755	0.06364	3.62621
O00541	75	PES1	PESC_HUMAN Pescadillo homolog OS=Homo sapiens OX=9606 GN=PES1 PE=1 SV=1			1.72	1.79	||NA|NA	1.755	0.0495	2.82051
P53396	700	ACLY	ACLY_HUMAN ATP-citrate synthase OS=Homo sapiens OX=9606 GN=ACLY PE=1 SV=3	1.14	1.84		2.28	NA|NA||NA	1.75333	0.57492	32.7902
P60891	193	PRPS1	PRPS1_HUMAN Ribose-phosphate pyrophosphokinase 1 OS=Homo sapiens OX=9606 GN=PRPS1 PE=1 SV=2	1.375			2.13	0.69871|||0.31996	1.7525	0.53387	30.4633
P00491	257	PNP	PNPH_HUMAN Purine nucleoside phosphorylase OS=Homo sapiens OX=9606 GN=PNP PE=1 SV=2	1.86		1.125	2.27	NA||0.00707|0.35355	1.75167	0.58014	33.1193
Q14444	7	CAPRIN1	CAPR1_HUMAN Caprin-1 OS=Homo sapiens OX=9606 GN=CAPRIN1 PE=1 SV=2	1.55		1.95		NA||NA|	1.75	0.28284	16.1623
Q96QK1	769	VPS35	VPS35_HUMAN Vacuolar protein sorting-associated protein 35 OS=Homo sapiens OX=9606 GN=VPS35 PE=1 SV=2	2.48			1.02	NA|||NA	1.75	1.03238	58.9931
Q9BV38	364	WDR18	WDR18_HUMAN WD repeat-containing protein 18 OS=Homo sapiens OX=9606 GN=WDR18 PE=1 SV=2	2.21	1.29			0.0|NA||	1.75	0.65054	37.1737
Q13435	587	SF3B2	SF3B2_HUMAN Splicing factor 3B subunit 2 OS=Homo sapiens OX=9606 GN=SF3B2 PE=1 SV=2		1.75			|NA||	1.75	NA	#VALUE!
P08865	131	RPSA	RSSA_HUMAN 40S ribosomal protein SA OS=Homo sapiens OX=9606 GN=RPSA PE=1 SV=4		1.75			|NA||	1.75	NA	#VALUE!
P12004	246	PCNA	PCNA_HUMAN Proliferating cell nuclear antigen OS=Homo sapiens OX=9606 GN=PCNA PE=1 SV=1			1.75		||NA|	1.75	NA	#VALUE!
Q7KZF4	185	SND1	SND1_HUMAN Staphylococcal nuclease domain-containing protein 1 OS=Homo sapiens OX=9606 GN=SND1 PE=1 SV=1				1.75	|||NA	1.75	NA	#VALUE!
P14618	84	PKM	KPYM_HUMAN Pyruvate kinase PKM OS=Homo sapiens OX=9606 GN=PKM PE=1 SV=4	1.41	2.49	1.46	1.63	0.54258|0.19799|0.75602|0.39992	1.7475	0.50388	28.8343
O15294	111	OGT	OGT1_HUMAN UDP-N-acetylglucosamine--peptide N-acetylglucosaminyltransferase 110 kDa subunit OS=Homo sapiens OX=9606 GN=OGT PE=1 SV=3	2.5	0.99			NA|NA||	1.745	1.06773	61.188
Q9UBD5	590	ORC3	ORC3_HUMAN Origin recognition complex subunit 3 OS=Homo sapiens OX=9606 GN=ORC3 PE=1 SV=1		1.41	2.08		|NA|NA|	1.745	0.47376	27.1496
Q9Y5P6	126	GMPPB	GMPPB_HUMAN Mannose-1-phosphate guanyltransferase beta OS=Homo sapiens OX=9606 GN=GMPPB PE=1 SV=2			1.82	1.67	||1.08894|NA	1.745	0.10607	6.07851
P33991	256	MCM4	MCM4_HUMAN DNA replication licensing factor MCM4 OS=Homo sapiens OX=9606 GN=MCM4 PE=1 SV=5		2.14	1.535	1.555	|NA|0.43134|0.16263	1.74333	0.34367	19.7134
Q9NSD9	297	FARSB	SYFB_HUMAN Phenylalanine--tRNA ligase beta subunit OS=Homo sapiens OX=9606 GN=FARSB PE=1 SV=3	1.51	2.41	1.59	1.46	0.6449|0.81823|0.65064|0.19799	1.7425	0.44821	25.7222
P48735	74	IDH2	IDHP_HUMAN Isocitrate dehydrogenase [NADP], mitochondrial OS=Homo sapiens OX=9606 GN=IDH2 PE=1 SV=2	2.08	1.85	1.69	1.35	NA|NA|0.0|NA	1.7425	0.30674	17.6034
Q12906	551	ILF3	ILF3_HUMAN Interleukin enhancer-binding factor 3 OS=Homo sapiens OX=9606 GN=ILF3 PE=1 SV=3	1.74				NA|||	1.74	NA	#VALUE!
P08243	412	ASNS	ASNS_HUMAN Asparagine synthetase [glutamine-hydrolyzing] OS=Homo sapiens OX=9606 GN=ASNS PE=1 SV=4	3.08	1.64	1.55	0.69	0.5831|1.06228|0.3691|0.85448	1.74	0.99066	56.9345
O60841	653	EIF5B	IF2P_HUMAN Eukaryotic translation initiation factor 5B OS=Homo sapiens OX=9606 GN=EIF5B PE=1 SV=4	2.61			0.87	NA|||NA	1.74	1.23037	70.7109
P23526	384	AHCY	SAHH_HUMAN Adenosylhomocysteinase OS=Homo sapiens OX=9606 GN=AHCY PE=1 SV=4	0.82			2.66	NA|||NA	1.74	1.30108	74.7747
Q08211	173	DHX9	DHX9_HUMAN ATP-dependent RNA helicase A OS=Homo sapiens OX=9606 GN=DHX9 PE=1 SV=4	1.74				NA|||	1.74	NA	#VALUE!
P30101	309	PDIA3	PDIA3_HUMAN Protein disulfide-isomerase A3 OS=Homo sapiens OX=9606 GN=PDIA3 PE=1 SV=4	1.74				NA|||	1.74	NA	#VALUE!
Q8IYD1	64	GSPT2	ERF3B_HUMAN Eukaryotic peptide chain release factor GTP-binding subunit ERF3B OS=Homo sapiens OX=9606 GN=GSPT2 PE=1 SV=2		1.74			|NA||	1.74	NA	#VALUE!
O75083	364	WDR1	WDR1_HUMAN WD repeat-containing protein 1 OS=Homo sapiens OX=9606 GN=WDR1 PE=1 SV=4			1.74		||NA|	1.74	NA	#VALUE!
Q562R1	102	ACTBL2	ACTBL_HUMAN Beta-actin-like protein 2 OS=Homo sapiens OX=9606 GN=ACTBL2 PE=1 SV=2			1.74		||NA|	1.74	NA	#VALUE!
P47897	232	QARS1	SYQ_HUMAN Glutamine--tRNA ligase OS=Homo sapiens OX=9606 GN=QARS1 PE=1 SV=1				1.74	|||0.48686	1.74	NA	#VALUE!
Q9Y3C1	41	NOP16	NOP16_HUMAN Nucleolar protein 16 OS=Homo sapiens OX=9606 GN=NOP16 PE=1 SV=2				1.74	|||NA	1.74	NA	#VALUE!
Q9H8Y8	29	GORASP2	GORS2_HUMAN Golgi reassembly-stacking protein 2 OS=Homo sapiens OX=9606 GN=GORASP2 PE=1 SV=3	2.83	1.02	1.375	1.73	0.73539|NA|0.43578|0.1963	1.73875	0.78312	45.0393
P34897	279	SHMT2	GLYM_HUMAN Serine hydroxymethyltransferase, mitochondrial OS=Homo sapiens OX=9606 GN=SHMT2 PE=1 SV=3	1.76	1.55	1.745	1.89	0.60803|NA|0.115|0.16257	1.73625	0.1402	8.07487
P61289	198	PSME3	PSME3_HUMAN Proteasome activator complex subunit 3 OS=Homo sapiens OX=9606 GN=PSME3 PE=1 SV=1			1.63	1.84	||NA|NA	1.735	0.14849	8.5585
P62195	171	PSMC5	PRS8_HUMAN 26S proteasome regulatory subunit 8 OS=Homo sapiens OX=9606 GN=PSMC5 PE=1 SV=1	1.51	1.99	1.75	1.68	0.04919|0.38919|0.38109|0.60607	1.7325	0.19906	11.4898
P54619	271	PRKAG1	AAKG1_HUMAN 5'-AMP-activated protein kinase subunit gamma-1 OS=Homo sapiens OX=9606 GN=PRKAG1 PE=1 SV=1	1.73				NA|||	1.73	NA	#VALUE!
P00918	10	CA2	CAH2_HUMAN Carbonic anhydrase 2 OS=Homo sapiens OX=9606 GN=CA2 PE=1 SV=2			1.73		||0.55154|	1.73	NA	#VALUE!
P42285	802	MTREX	MTREX_HUMAN Exosome RNA helicase MTR4 OS=Homo sapiens OX=9606 GN=MTREX PE=1 SV=3			1.73		||0.15556|	1.73	NA	#VALUE!
P30876	481	POLR2B	RPB2_HUMAN DNA-directed RNA polymerase II subunit RPB2 OS=Homo sapiens OX=9606 GN=POLR2B PE=1 SV=1			1.73		||NA|	1.73	NA	#VALUE!
P43243	244	MATR3	MATR3_HUMAN Matrin-3 OS=Homo sapiens OX=9606 GN=MATR3 PE=1 SV=2				1.73	|||NA	1.73	NA	#VALUE!
P53396	975	ACLY	ACLY_HUMAN ATP-citrate synthase OS=Homo sapiens OX=9606 GN=ACLY PE=1 SV=3				1.73	|||NA	1.73	NA	#VALUE!
P30084	119	ECHS1	ECHM_HUMAN Enoyl-CoA hydratase, mitochondrial OS=Homo sapiens OX=9606 GN=ECHS1 PE=1 SV=4	1.84	1.89	1.75	1.43	NA|NA|0.17502|0.13856	1.7275	0.20662	11.9606
O00170	183	AIP	AIP_HUMAN AH receptor-interacting protein OS=Homo sapiens OX=9606 GN=AIP PE=1 SV=2	2.22	1.53		1.43	NA|NA||0.16971	1.72667	0.43016	24.9127
P54886	390	ALDH18A1	P5CS_HUMAN Delta-1-pyrroline-5-carboxylate synthase OS=Homo sapiens OX=9606 GN=ALDH18A1 PE=1 SV=2	1.1	2.92	1.29	1.59	0.79387|0.64663|0.27731|0.47486	1.725	0.82181	47.6412
Q15125	210	EBP	EBP_HUMAN 3-beta-hydroxysteroid-Delta(8),Delta(7)-isomerase OS=Homo sapiens OX=9606 GN=EBP PE=1 SV=3			1.725		||0.38891|	1.725	NA	#VALUE!
Q8WW12	169	PCNP	PCNP_HUMAN PEST proteolytic signal-containing nuclear protein OS=Homo sapiens OX=9606 GN=PCNP PE=1 SV=2	2.48		1.57	1.11	0.0||0.065|NA	1.72	0.69721	40.5355
Q99729	325	HNRNPAB	ROAA_HUMAN Heterogeneous nuclear ribonucleoprotein A/B OS=Homo sapiens OX=9606 GN=HNRNPAB PE=1 SV=2				1.72	|||NA	1.72	NA	#VALUE!
Q10567	149	AP1B1	AP1B1_HUMAN AP-1 complex subunit beta-1 OS=Homo sapiens OX=9606 GN=AP1B1 PE=1 SV=2				1.72	|||0.0	1.72	NA	#VALUE!
Q02790	363	FKBP4	FKBP4_HUMAN Peptidyl-prolyl cis-trans isomerase FKBP4 OS=Homo sapiens OX=9606 GN=FKBP4 PE=1 SV=3	3.06	1.06	1.66	1.095	1.53545|1.63851|NA|0.71418	1.71875	0.93549	54.4285
P49327	293	FASN	FAS_HUMAN Fatty acid synthase OS=Homo sapiens OX=9606 GN=FASN PE=1 SV=3			1.86	1.57	||0.69831|0.89523	1.715	0.20506	11.9569
P61201	346	COPS2	CSN2_HUMAN COP9 signalosome complex subunit 2 OS=Homo sapiens OX=9606 GN=COPS2 PE=1 SV=1	1.415	2.39	2.125	0.92	0.38891|NA|0.3182|NA	1.7125	0.66976	39.1101
P57740	805	NUP107	NU107_HUMAN Nuclear pore complex protein Nup107 OS=Homo sapiens OX=9606 GN=NUP107 PE=1 SV=1		1.71			|NA||	1.71	NA	#VALUE!
P49411	310	TUFM	EFTU_HUMAN Elongation factor Tu, mitochondrial OS=Homo sapiens OX=9606 GN=TUFM PE=1 SV=2			1.31	2.11	||0.71673|NA	1.71	0.56569	33.0813
Q04446	568	GBE1	GLGB_HUMAN 1,4-alpha-glucan-branching enzyme OS=Homo sapiens OX=9606 GN=GBE1 PE=1 SV=3			1.71		||NA|	1.71	NA	#VALUE!
Q96C19	130	EFHD2	EFHD2_HUMAN EF-hand domain-containing protein D2 OS=Homo sapiens OX=9606 GN=EFHD2 PE=1 SV=1				1.71	|||NA	1.71	NA	#VALUE!
P08708	29	RPS17	RS17_HUMAN 40S ribosomal protein S17 OS=Homo sapiens OX=9606 GN=RPS17 PE=1 SV=2	0.985	2.08	1.87	1.9	0.7024|0.62801|0.63366|NA	1.70875	0.49133	28.7538
P35580	1201	MYH10	MYH10_HUMAN Myosin-10 OS=Homo sapiens OX=9606 GN=MYH10 PE=1 SV=3	1.745	2.51	1.68	0.9	1.492|2.26274|0.14799|NA	1.70875	0.65783	38.4977
Q07065	13	CKAP4	CKAP4_HUMAN Cytoskeleton-associated protein 4 OS=Homo sapiens OX=9606 GN=CKAP4 PE=1 SV=2	2.22			1.19	NA|||NA	1.705	0.72832	42.7167
P17987	113	TCP1	TCPA_HUMAN T-complex protein 1 subunit alpha OS=Homo sapiens OX=9606 GN=TCP1 PE=1 SV=1	2.455	1.01	1.445	1.91	0.45962|NA|0.56103|NA	1.705	0.62052	36.3941
P78527	2787	PRKDC	PRKDC_HUMAN DNA-dependent protein kinase catalytic subunit OS=Homo sapiens OX=9606 GN=PRKDC PE=1 SV=3	2.35	1.78	1.64	1.05	0.5374|0.0|0.39902|NA	1.705	0.53382	31.3091
P13010	558	XRCC5	XRCC5_HUMAN X-ray repair cross-complementing protein 5 OS=Homo sapiens OX=9606 GN=XRCC5 PE=1 SV=3			2.19	1.22	||NA|NA	1.705	0.68589	40.2282
P08559	121	PDHA1	ODPA_HUMAN Pyruvate dehydrogenase E1 component subunit alpha, somatic form, mitochondrial OS=Homo sapiens OX=9606 GN=PDHA1 PE=1 SV=3	1.7				0.9051|||	1.7	NA	#VALUE!
Q96QK1	776	VPS35	VPS35_HUMAN Vacuolar protein sorting-associated protein 35 OS=Homo sapiens OX=9606 GN=VPS35 PE=1 SV=2			1.87	1.53	||NA|NA	1.7	0.24042	14.1424
Q9UHB6	433	LIMA1	LIMA1_HUMAN LIM domain and actin-binding protein 1 OS=Homo sapiens OX=9606 GN=LIMA1 PE=1 SV=1				1.7	|||NA	1.7	NA	#VALUE!
Q9UNH7	221	SNX6	SNX6_HUMAN Sorting nexin-6 OS=Homo sapiens OX=9606 GN=SNX6 PE=1 SV=1				1.7	|||NA	1.7	NA	#VALUE!
P12268	504	IMPDH2	IMDH2_HUMAN Inosine-5'-monophosphate dehydrogenase 2 OS=Homo sapiens OX=9606 GN=IMPDH2 PE=1 SV=2	2.88	1.41	1.4	1.105	NA|NA|0.50757|0.24669	1.69875	0.80011	47.0999
Q99623	47	PHB2	PHB2_HUMAN Prohibitin-2 OS=Homo sapiens OX=9606 GN=PHB2 PE=1 SV=2	1.53			1.86	NA|||NA	1.695	0.23335	13.767
P69905	51	HBA1	HBA_HUMAN Hemoglobin subunit alpha OS=Homo sapiens OX=9606 GN=HBA1 PE=1 SV=2	1.6		1.64	1.83	NA||0.16971|0.09238	1.69	0.12288	7.27101
Q01081	141	U2AF1	U2AF1_HUMAN Splicing factor U2AF 35 kDa subunit OS=Homo sapiens OX=9606 GN=U2AF1 PE=1 SV=3	1.69				NA|||	1.69	NA	#VALUE!
P48735	175	IDH2	IDHP_HUMAN Isocitrate dehydrogenase [NADP], mitochondrial OS=Homo sapiens OX=9606 GN=IDH2 PE=1 SV=2		1.3	2.08		|NA|NA|	1.69	0.55154	32.6355
P27824	128	CANX	CALX_HUMAN Calnexin OS=Homo sapiens OX=9606 GN=CANX PE=1 SV=2		1.69			|NA||	1.69	NA	#VALUE!
Q96PK6	642	RBM14	RBM14_HUMAN RNA-binding protein 14 OS=Homo sapiens OX=9606 GN=RBM14 PE=1 SV=2		1.4		1.98	|0.35355||0.56569	1.69	0.41012	24.2675
P51553	342	IDH3G	IDH3G_HUMAN Isocitrate dehydrogenase [NAD] subunit gamma, mitochondrial OS=Homo sapiens OX=9606 GN=IDH3G PE=1 SV=1		1.73	1.65		|0.73539|0.39903|	1.69	0.05657	3.34734
Q6UB35	509	MTHFD1L	C1TM_HUMAN Monofunctional C1-tetrahydrofolate synthase, mitochondrial OS=Homo sapiens OX=9606 GN=MTHFD1L PE=1 SV=1			1.69		||NA|	1.69	NA	#VALUE!
Q2TAL8	677	QRICH1	QRIC1_HUMAN Glutamine-rich protein 1 OS=Homo sapiens OX=9606 GN=QRICH1 PE=1 SV=1			1.69		||NA|	1.69	NA	#VALUE!
P10768	206	ESD	ESTD_HUMAN S-formylglutathione hydrolase OS=Homo sapiens OX=9606 GN=ESD PE=1 SV=2			2.44	0.94	||NA|0.51962	1.69	1.06066	62.7609
P22102	26	GART	PUR2_HUMAN Trifunctional purine biosynthetic protein adenosine-3 OS=Homo sapiens OX=9606 GN=GART PE=1 SV=1				1.69	|||NA	1.69	NA	#VALUE!
Q15555	197	MAPRE2	MARE2_HUMAN Microtubule-associated protein RP/EB family member 2 OS=Homo sapiens OX=9606 GN=MAPRE2 PE=1 SV=1				1.69	|||NA	1.69	NA	#VALUE!
P49327	104	FASN	FAS_HUMAN Fatty acid synthase OS=Homo sapiens OX=9606 GN=FASN PE=1 SV=3				1.69	|||NA	1.69	NA	#VALUE!
P25440	531	BRD2	BRD2_HUMAN Bromodomain-containing protein 2 OS=Homo sapiens OX=9606 GN=BRD2 PE=1 SV=2				1.69	|||0.08485	1.69	NA	#VALUE!
Q02790	216	FKBP4	FKBP4_HUMAN Peptidyl-prolyl cis-trans isomerase FKBP4 OS=Homo sapiens OX=9606 GN=FKBP4 PE=1 SV=3	0.98	2.39			NA|0.18385||	1.685	0.99702	59.1703
Q8NFH3	303	NUP43	NUP43_HUMAN Nucleoporin Nup43 OS=Homo sapiens OX=9606 GN=NUP43 PE=1 SV=1		2.12		1.25	|NA||NA	1.685	0.61518	36.5092
P33316	122	DUT	DUT_HUMAN Deoxyuridine 5'-triphosphate nucleotidohydrolase, mitochondrial OS=Homo sapiens OX=9606 GN=DUT PE=1 SV=4	1.68		1.93	1.44	NA||NA|NA	1.68333	0.24502	14.5557
Q96PK6	56	RBM14	RBM14_HUMAN RNA-binding protein 14 OS=Homo sapiens OX=9606 GN=RBM14 PE=1 SV=2	0.72	2.16	2.17		NA|NA|NA|	1.68333	0.83429	49.5619
Q9Y2W1	613	THRAP3	TR150_HUMAN Thyroid hormone receptor-associated protein 3 OS=Homo sapiens OX=9606 GN=THRAP3 PE=1 SV=2	1.79	1.08	1.89	1.97	NA|NA|NA|NA	1.6825	0.40836	24.271
P42167	267	TMPO	LAP2B_HUMAN Lamina-associated polypeptide 2, isoforms beta/gamma OS=Homo sapiens OX=9606 GN=TMPO PE=1 SV=2	1.68				NA|||	1.68	NA	#VALUE!
Q14151	779	SAFB2	SAFB2_HUMAN Scaffold attachment factor B2 OS=Homo sapiens OX=9606 GN=SAFB2 PE=1 SV=1		1.8		1.56	|NA||NA	1.68	0.16971	10.1018
Q5TF21	279	SOGA3	SOGA3_HUMAN Protein SOGA3 OS=Homo sapiens OX=9606 GN=SOGA3 PE=3 SV=1				1.68	|||NA	1.68	NA	#VALUE!
Q7Z6Z7	1086	HUWE1	HUWE1_HUMAN E3 ubiquitin-protein ligase HUWE1 OS=Homo sapiens OX=9606 GN=HUWE1 PE=1 SV=3	1.94	1.41			0.0|0.84137||	1.675	0.37477	22.3743
P46782	51	RPS5	RS5_HUMAN 40S ribosomal protein S5 OS=Homo sapiens OX=9606 GN=RPS5 PE=1 SV=4			1.99	1.36	||NA|NA	1.675	0.44548	26.5958
Q9UNE7	162	STUB1	CHIP_HUMAN E3 ubiquitin-protein ligase CHIP OS=Homo sapiens OX=9606 GN=STUB1 PE=1 SV=2				1.675	|||0.34648	1.675	NA	#VALUE!
P46060	578	RANGAP1	RAGP1_HUMAN Ran GTPase-activating protein 1 OS=Homo sapiens OX=9606 GN=RANGAP1 PE=1 SV=1		1.06	1.97	1.99	|NA|0.66008|0.39425	1.67333	0.53126	31.7487
Q8TAT6	132	NPLOC4	NPL4_HUMAN Nuclear protein localization protein 4 homolog OS=Homo sapiens OX=9606 GN=NPLOC4 PE=1 SV=3		1.67			|NA||	1.67	NA	#VALUE!
P35573	740	AGL	GDE_HUMAN Glycogen debranching enzyme OS=Homo sapiens OX=9606 GN=AGL PE=1 SV=3			1.11	2.23	||NA|NA	1.67	0.79196	47.4228
P11586	868	MTHFD1	C1TC_HUMAN C-1-tetrahydrofolate synthase, cytoplasmic OS=Homo sapiens OX=9606 GN=MTHFD1 PE=1 SV=3	1.695		1.46	1.85	0.74246||0.52634|0.51627	1.66833	0.19636	11.7699
O14979	296	HNRNPDL	HNRDL_HUMAN Heterogeneous nuclear ribonucleoprotein D-like OS=Homo sapiens OX=9606 GN=HNRNPDL PE=1 SV=3		1.06	2.27	1.675	|NA|NA|0.60982	1.66833	0.60503	36.2656
P07737	120	PFN1	PROF1_HUMAN Profilin-1 OS=Homo sapiens OX=9606 GN=PFN1 PE=1 SV=2	1.405	2.79	1.35	1.125	1.59099|0.37528|0.87048|1.25158	1.6675	0.75807	45.4615
Q9BQG0	172	MYBBP1A	MBB1A_HUMAN Myb-binding protein 1A OS=Homo sapiens OX=9606 GN=MYBBP1A PE=1 SV=2	1.86		1.47		NA||NA|	1.665	0.27577	16.5628
P63279	20	UBE2I	UBC9_HUMAN SUMO-conjugating enzyme UBC9 OS=Homo sapiens OX=9606 GN=UBE2I PE=1 SV=1	1.69			1.64	NA|||0.09274	1.665	0.03536	2.12372
Q9NZ01	149	TECR	TECR_HUMAN Very-long-chain enoyl-CoA reductase OS=Homo sapiens OX=9606 GN=TECR PE=1 SV=1	1.595	1.64	1.665	1.755	0.55314|0.44639|0.61514|0.55783	1.66375	0.06738	4.04989
Q9NZ01	3	TECR	TECR_HUMAN Very-long-chain enoyl-CoA reductase OS=Homo sapiens OX=9606 GN=TECR PE=1 SV=1	1.815		1.51		0.77075||NA|	1.6625	0.21567	12.9726
P49327	2481	FASN	FAS_HUMAN Fatty acid synthase OS=Homo sapiens OX=9606 GN=FASN PE=1 SV=3		2.04	1.55	1.395	|0.63151|0.71101|0.34648	1.66167	0.33669	20.2621
P52209	466	PGD	6PGD_HUMAN 6-phosphogluconate dehydrogenase, decarboxylating OS=Homo sapiens OX=9606 GN=PGD PE=1 SV=3		1.48	1.78	1.725	|NA|NA|1.05359	1.66167	0.15971	9.61142
P48147	20	PREP	PPCE_HUMAN Prolyl endopeptidase OS=Homo sapiens OX=9606 GN=PREP PE=1 SV=2	1.76			1.56	NA|||NA	1.66	0.14142	8.51928
Q02878	136	RPL6	RL6_HUMAN 60S ribosomal protein L6 OS=Homo sapiens OX=9606 GN=RPL6 PE=1 SV=3	1.42	1.9			NA|NA||	1.66	0.33941	20.4464
P55060	144	CSE1L	XPO2_HUMAN Exportin-2 OS=Homo sapiens OX=9606 GN=CSE1L PE=1 SV=3	1.92	1.3		1.76	NA|0.31113||0.53669	1.66	0.32187	19.3898
P04843	602	RPN1	RPN1_HUMAN Dolichyl-diphosphooligosaccharide--protein glycosyltransferase subunit 1 OS=Homo sapiens OX=9606 GN=RPN1 PE=1 SV=1	2.5	0.95	1.43	1.76	NA|NA|NA|0.12124	1.66	0.65131	39.2355
O43615	366	TIMM44	TIM44_HUMAN Mitochondrial import inner membrane translocase subunit TIM44 OS=Homo sapiens OX=9606 GN=TIMM44 PE=1 SV=2		1.66			|NA||	1.66	NA	#VALUE!
Q13263	344	TRIM28	TIF1B_HUMAN Transcription intermediary factor 1-beta OS=Homo sapiens OX=9606 GN=TRIM28 PE=1 SV=5	1.04		0.89	3.04	NA||NA|NA	1.65667	1.20035	72.4556
Q9Y265	348	RUVBL1	RUVB1_HUMAN RuvB-like 1 OS=Homo sapiens OX=9606 GN=RUVBL1 PE=1 SV=1	1.99		2.01	0.965	1.11577||NA|0.14849	1.655	0.59764	36.1112
Q9UKV3	764	ACIN1	ACINU_HUMAN Apoptotic chromatin condensation inducer in the nucleus OS=Homo sapiens OX=9606 GN=ACIN1 PE=1 SV=2			1.85	1.46	||NA|0.0	1.655	0.27577	16.6628
Q9Y490	788	TLN1	TLN1_HUMAN Talin-1 OS=Homo sapiens OX=9606 GN=TLN1 PE=1 SV=3	1.705		1.68	1.575	0.45962||NA|0.51619	1.65333	0.06898	4.17219
P22087	156	FBL	FBRL_HUMAN rRNA 2'-O-methyltransferase fibrillarin OS=Homo sapiens OX=9606 GN=FBL PE=1 SV=2	2.15	1.76	1.05		0.45884|NA|NA|	1.65333	0.5577	33.7319
O00165	76	HAX1	HAX1_HUMAN HCLS1-associated protein X-1 OS=Homo sapiens OX=9606 GN=HAX1 PE=1 SV=2	1.8		1.5		NA||NA|	1.65	0.21213	12.8564
Q14980	1444	NUMA1	NUMA1_HUMAN Nuclear mitotic apparatus protein 1 OS=Homo sapiens OX=9606 GN=NUMA1 PE=1 SV=2		2.15	1.15		|NA|0.25456|	1.65	0.70711	42.8552
P21108	250	PRPS1L1	PRPS3_HUMAN Ribose-phosphate pyrophosphokinase 3 OS=Homo sapiens OX=9606 GN=PRPS1L1 PE=1 SV=2		1.65			|0.41012||	1.65	NA	#VALUE!
Q8NE71	314	ABCF1	ABCF1_HUMAN ATP-binding cassette sub-family F member 1 OS=Homo sapiens OX=9606 GN=ABCF1 PE=1 SV=2				1.65	|||0.0	1.65	NA	#VALUE!
Q14166	181	TTLL12	TTL12_HUMAN Tubulin--tyrosine ligase-like protein 12 OS=Homo sapiens OX=9606 GN=TTLL12 PE=1 SV=2				1.65	|||NA	1.65	NA	#VALUE!
P46776	19	RPL27A	RL27A_HUMAN 60S ribosomal protein L27a OS=Homo sapiens OX=9606 GN=RPL27A PE=1 SV=2	0.92	3.015	1.01		0.41012|1.13175|NA|	1.64833	1.18442	71.8558
Q9Y2S7	121	POLDIP2	PDIP2_HUMAN Polymerase delta-interacting protein 2 OS=Homo sapiens OX=9606 GN=POLDIP2 PE=1 SV=1	2.67	1.63	1.24	1.05	NA|NA|NA|NA	1.6475	0.72316	43.8944
P54886	129	ALDH18A1	P5CS_HUMAN Delta-1-pyrroline-5-carboxylate synthase OS=Homo sapiens OX=9606 GN=ALDH18A1 PE=1 SV=2		2.29		1.005	|NA||0.33234	1.6475	0.90863	55.152
P14868	445	DARS1	SYDC_HUMAN Aspartate--tRNA ligase, cytoplasmic OS=Homo sapiens OX=9606 GN=DARS1 PE=1 SV=2	1.45			1.84	NA|||NA	1.645	0.27577	16.7641
Q7KZF4	721	SND1	SND1_HUMAN Staphylococcal nuclease domain-containing protein 1 OS=Homo sapiens OX=9606 GN=SND1 PE=1 SV=1	2.345	1.95	1.23	1.05	1.03945|NA|0.20257|NA	1.64375	0.60808	36.9935
P54886	769	ALDH18A1	P5CS_HUMAN Delta-1-pyrroline-5-carboxylate synthase OS=Homo sapiens OX=9606 GN=ALDH18A1 PE=1 SV=2	2.075	2.17	1.25	1.08	0.19053|NA|NA|NA	1.64375	0.5585	33.9772
P23921	640	RRM1	RIR1_HUMAN Ribonucleoside-diphosphate reductase large subunit OS=Homo sapiens OX=9606 GN=RRM1 PE=1 SV=1	1.24	2.22	1.205	1.91	0.24042|1.68291|0.3182|0.58494	1.64375	0.50281	30.5892
P32322	305	PYCR1	P5CR1_HUMAN Pyrroline-5-carboxylate reductase 1, mitochondrial OS=Homo sapiens OX=9606 GN=PYCR1 PE=1 SV=2	1.54			1.74	NA|||NA	1.64	0.14142	8.62317
Q9ULV4	392	CORO1C	COR1C_HUMAN Coronin-1C OS=Homo sapiens OX=9606 GN=CORO1C PE=1 SV=1			2.46	0.82	||NA|0.18475	1.64	1.15966	70.711
Q9Y224	208	RTRAF	RTRAF_HUMAN RNA transcription, translation and transport factor protein OS=Homo sapiens OX=9606 GN=RTRAF PE=1 SV=1			1.72	1.56	||0.08485|0.35907	1.64	0.11314	6.89878
P14324	86	FDPS	FPPS_HUMAN Farnesyl pyrophosphate synthase OS=Homo sapiens OX=9606 GN=FDPS PE=1 SV=4				1.64	|||NA	1.64	NA	#VALUE!
P34897	270	SHMT2	GLYM_HUMAN Serine hydroxymethyltransferase, mitochondrial OS=Homo sapiens OX=9606 GN=SHMT2 PE=1 SV=3	2.82	1.02	0.985	1.73	0.66468|1.30451|0.69207|0.24028	1.63875	0.85905	52.4211
P53621	558	COPA	COPA_HUMAN Coatomer subunit alpha OS=Homo sapiens OX=9606 GN=COPA PE=1 SV=2		1.615	1.66	1.64	|1.0954|0.60622|NA	1.63833	0.02255	1.3764
Q14151	770	SAFB2	SAFB2_HUMAN Scaffold attachment factor B2 OS=Homo sapiens OX=9606 GN=SAFB2 PE=1 SV=1	2.43			0.845	0.06506|||0.23335	1.6375	1.12076	68.4434
Q15424	751	SAFB	SAFB1_HUMAN Scaffold attachment factor B1 OS=Homo sapiens OX=9606 GN=SAFB PE=1 SV=4	2.43			0.845	0.06506|||0.23335	1.6375	1.12076	68.4434
P46779	45	RPL28	RL28_HUMAN 60S ribosomal protein L28 OS=Homo sapiens OX=9606 GN=RPL28 PE=1 SV=3	2.79	2.31	0.93	0.51	NA|0.74312|NA|NA	1.635	1.08816	66.5541
Q13263	373	TRIM28	TIF1B_HUMAN Transcription intermediary factor 1-beta OS=Homo sapiens OX=9606 GN=TRIM28 PE=1 SV=5	1.27			2	NA|||0.4389	1.635	0.51619	31.5713
P15880	136	RPS2	RS2_HUMAN 40S ribosomal protein S2 OS=Homo sapiens OX=9606 GN=RPS2 PE=1 SV=2	1.405		1.755	1.735	1.52028||0.03536|0.04203	1.63167	0.19655	12.0459
P09936	59	UCHL1	UCHL1_HUMAN Ubiquitin carboxyl-terminal hydrolase isozyme L1 OS=Homo sapiens OX=9606 GN=UCHL1 PE=1 SV=2	1.87	1.45	1.95	1.255	NA|0.42426|NA|0.43134	1.63125	0.33318	20.4248
P31943	354	HNRNPH1	HNRH1_HUMAN Heterogeneous nuclear ribonucleoprotein H OS=Homo sapiens OX=9606 GN=HNRNPH1 PE=1 SV=4	1.18		2.44	1.27	NA||NA|NA	1.63	0.70292	43.1239
P55263	98	ADK	ADK_HUMAN Adenosine kinase OS=Homo sapiens OX=9606 GN=ADK PE=1 SV=2	1.63				NA|||	1.63	NA	#VALUE!
Q13136	527	PPFIA1	LIPA1_HUMAN Liprin-alpha-1 OS=Homo sapiens OX=9606 GN=PPFIA1 PE=1 SV=1	1.93		1.95	1.01	0.09899||0.36143|0.11314	1.63	0.53703	32.9466
Q14974	567	KPNB1	IMB1_HUMAN Importin subunit beta-1 OS=Homo sapiens OX=9606 GN=KPNB1 PE=1 SV=2	1.63				NA|||	1.63	NA	#VALUE!
P78527	2777	PRKDC	PRKDC_HUMAN DNA-dependent protein kinase catalytic subunit OS=Homo sapiens OX=9606 GN=PRKDC PE=1 SV=3	0.49	3.23	1.52	1.28	0.46765|0.0|0.58768|0.26541	1.63	1.15386	70.789
Q92598	329	HSPH1	HS105_HUMAN Heat shock protein 105 kDa OS=Homo sapiens OX=9606 GN=HSPH1 PE=1 SV=1		1.65	1.89	1.35	|NA|0.0|0.35355	1.63	0.27055	16.5982
Q15102	79	PAFAH1B3	PA1B3_HUMAN Platelet-activating factor acetylhydrolase IB subunit alpha1 OS=Homo sapiens OX=9606 GN=PAFAH1B3 PE=1 SV=1				1.63	|||NA	1.63	NA	#VALUE!
P53621	944	COPA	COPA_HUMAN Coatomer subunit alpha OS=Homo sapiens OX=9606 GN=COPA PE=1 SV=2	1.16	2.105	1.28	1.96	0.17059|0.62933|0.36927|0.68042	1.62625	0.47535	29.2298
Q9Y4L1	112	HYOU1	HYOU1_HUMAN Hypoxia up-regulated protein 1 OS=Homo sapiens OX=9606 GN=HYOU1 PE=1 SV=1		2.27	0.98		|NA|NA|	1.625	0.91217	56.1335
Q16891	456	IMMT	MIC60_HUMAN MICOS complex subunit MIC60 OS=Homo sapiens OX=9606 GN=IMMT PE=1 SV=1	2.15			1.09	NA|||NA	1.62	0.74953	46.2673
Q9Y2L1	685	DIS3	RRP44_HUMAN Exosome complex exonuclease RRP44 OS=Homo sapiens OX=9606 GN=DIS3 PE=1 SV=2	2.13			1.11	NA|||NA	1.62	0.72125	44.5216
O95573	708	ACSL3	ACSL3_HUMAN Long-chain-fatty-acid--CoA ligase 3 OS=Homo sapiens OX=9606 GN=ACSL3 PE=1 SV=3		1.62			|NA||	1.62	NA	#VALUE!
Q96H79	143	ZC3HAV1L	ZCCHL_HUMAN Zinc finger CCCH-type antiviral protein 1-like OS=Homo sapiens OX=9606 GN=ZC3HAV1L PE=1 SV=2		2.37		0.87	|NA||NA	1.62	1.06066	65.4728
P30101	127	PDIA3	PDIA3_HUMAN Protein disulfide-isomerase A3 OS=Homo sapiens OX=9606 GN=PDIA3 PE=1 SV=4			1.62		||NA|	1.62	NA	#VALUE!
P61158	80	ACTR3	ARP3_HUMAN Actin-related protein 3 OS=Homo sapiens OX=9606 GN=ACTR3 PE=1 SV=3			1.69	1.55	||NA|NA	1.62	0.09899	6.11049
Q9H6Z4	505	RANBP3	RANB3_HUMAN Ran-binding protein 3 OS=Homo sapiens OX=9606 GN=RANBP3 PE=1 SV=1				1.62	|||NA	1.62	NA	#VALUE!
P49327	789	FASN	FAS_HUMAN Fatty acid synthase OS=Homo sapiens OX=9606 GN=FASN PE=1 SV=3	1.37	1.6		1.88	NA|NA||0.0	1.61667	0.25541	15.7985
Q00610	1021	CLTC	CLH1_HUMAN Clathrin heavy chain 1 OS=Homo sapiens OX=9606 GN=CLTC PE=1 SV=5	1.445	1.75	1.8	1.47	0.62881|0.53455|0.25515|0.14151	1.61625	0.18472	11.4289
Q9Y383	209	LUC7L2	LC7L2_HUMAN Putative RNA-binding protein Luc7-like 2 OS=Homo sapiens OX=9606 GN=LUC7L2 PE=1 SV=2	1.02	2.165	1.65		NA|1.26572|0.49497|	1.61167	0.57346	35.5817
Q9NQ29	209	LUC7L	LUC7L_HUMAN Putative RNA-binding protein Luc7-like 1 OS=Homo sapiens OX=9606 GN=LUC7L PE=1 SV=1	1.02	2.165	1.65		NA|1.26572|0.49497|	1.61167	0.57346	35.5817
P47897	256	QARS1	SYQ_HUMAN Glutamine--tRNA ligase OS=Homo sapiens OX=9606 GN=QARS1 PE=1 SV=1	1.31		1.91		NA||NA|	1.61	0.42426	26.3516
Q9BS26	306	ERP44	ERP44_HUMAN Endoplasmic reticulum resident protein 44 OS=Homo sapiens OX=9606 GN=ERP44 PE=1 SV=1	1.4	1.22		2.21	NA|NA||NA	1.61	0.52735	32.7547
P30153	127	PPP2R1A	2AAA_HUMAN Serine/threonine-protein phosphatase 2A 65 kDa regulatory subunit A alpha isoform OS=Homo sapiens OX=9606 GN=PPP2R1A PE=1 SV=4		2.08		1.14	|NA||0.22627	1.61	0.66468	41.2845
Q13158	160	FADD	FADD_HUMAN FAS-associated death domain protein OS=Homo sapiens OX=9606 GN=FADD PE=1 SV=1		1.61			|NA||	1.61	NA	#VALUE!
O14654	1190	IRS4	IRS4_HUMAN Insulin receptor substrate 4 OS=Homo sapiens OX=9606 GN=IRS4 PE=1 SV=1			1.4	1.82	||NA|NA	1.61	0.29698	18.446
Q6P2Q9	2089	PRPF8	PRP8_HUMAN Pre-mRNA-processing-splicing factor 8 OS=Homo sapiens OX=9606 GN=PRPF8 PE=1 SV=2			1.61		||0.12858|	1.61	NA	#VALUE!
Q53H12	174	AGK	AGK_HUMAN Acylglycerol kinase, mitochondrial OS=Homo sapiens OX=9606 GN=AGK PE=1 SV=2			1.61		||0.02|	1.61	NA	#VALUE!
Q8N5K1	117	CISD2	CISD2_HUMAN CDGSH iron-sulfur domain-containing protein 2 OS=Homo sapiens OX=9606 GN=CISD2 PE=1 SV=1			1.61		||NA|	1.61	NA	#VALUE!
Q9H2M9	1318	RAB3GAP2	RBGPR_HUMAN Rab3 GTPase-activating protein non-catalytic subunit OS=Homo sapiens OX=9606 GN=RAB3GAP2 PE=1 SV=1				1.61	|||NA	1.61	NA	#VALUE!
P48444	330	ARCN1	COPD_HUMAN Coatomer subunit delta OS=Homo sapiens OX=9606 GN=ARCN1 PE=1 SV=1				1.61	|||NA	1.61	NA	#VALUE!
P09874	822	PARP1	PARP1_HUMAN Poly [ADP-ribose] polymerase 1 OS=Homo sapiens OX=9606 GN=PARP1 PE=1 SV=4				1.61	|||NA	1.61	NA	#VALUE!
P10768	74	ESD	ESTD_HUMAN S-formylglutathione hydrolase OS=Homo sapiens OX=9606 GN=ESD PE=1 SV=2	1.49	2.36	1.7	0.88	NA|0.59632|NA|0.05774	1.6075	0.61043	37.9739
P78527	3748	PRKDC	PRKDC_HUMAN DNA-dependent protein kinase catalytic subunit OS=Homo sapiens OX=9606 GN=PRKDC PE=1 SV=3	2.02	1.36	1.34	1.71	NA|0.3766|0.02887|0.63238	1.6075	0.32325	20.1089
Q14008	447	CKAP5	CKAP5_HUMAN Cytoskeleton-associated protein 5 OS=Homo sapiens OX=9606 GN=CKAP5 PE=1 SV=3	1.24	2.24		1.34	NA|NA||NA	1.60667	0.55076	34.2796
O95197	1003	RTN3	RTN3_HUMAN Reticulon-3 OS=Homo sapiens OX=9606 GN=RTN3 PE=1 SV=2	2.01	1.2			NA|NA||	1.605	0.57276	35.686
Q71U36	393	TUBA1A	TBA1A_HUMAN Tubulin alpha-1A chain OS=Homo sapiens OX=9606 GN=TUBA1A PE=1 SV=1	1.85			1.36	NA|||0.0	1.605	0.34648	21.5875
Q14247	66	CTTN	SRC8_HUMAN Src substrate cortactin OS=Homo sapiens OX=9606 GN=CTTN PE=1 SV=2		0.78	2.43		|0.33941|NA|	1.605	1.16673	72.6935
Q9UII2	73	ATP5IF1	ATIF1_HUMAN ATPase inhibitor, mitochondrial OS=Homo sapiens OX=9606 GN=ATP5IF1 PE=1 SV=1	1.2	2.51	1.32	1.38	NA|NA|0.32527|0.19009	1.6025	0.60961	38.0412
P07814	1243	EPRS1	SYEP_HUMAN Bifunctional glutamate/proline--tRNA ligase OS=Homo sapiens OX=9606 GN=EPRS1 PE=1 SV=5	1.65	1.66	2	1.1	0.0|0.57501|NA|NA	1.6025	0.37241	23.2393
Q15369	35	ELOC	ELOC_HUMAN Elongin-C OS=Homo sapiens OX=9606 GN=ELOC PE=1 SV=1	0.99	1.51	1.64	2.27	NA|NA|NA|NA	1.6025	0.5262	32.8362
P33993	301	MCM7	MCM7_HUMAN DNA replication licensing factor MCM7 OS=Homo sapiens OX=9606 GN=MCM7 PE=1 SV=4	1.28	2.17		1.35	NA|NA||NA	1.6	0.49487	30.9294
P39023	322	RPL3	RL3_HUMAN 60S ribosomal protein L3 OS=Homo sapiens OX=9606 GN=RPL3 PE=1 SV=2		1.6			|NA||	1.6	NA	#VALUE!
P12270	850	TPR	TPR_HUMAN Nucleoprotein TPR OS=Homo sapiens OX=9606 GN=TPR PE=1 SV=3		1.67	1.51	1.62	|NA|NA|NA	1.6	0.08185	5.11562
P28370	675	SMARCA1	SMCA1_HUMAN Probable global transcription activator SNF2L1 OS=Homo sapiens OX=9606 GN=SMARCA1 PE=1 SV=2		1.1	2.1		|NA|NA|	1.6	0.70711	44.1944
O95197	910	RTN3	RTN3_HUMAN Reticulon-3 OS=Homo sapiens OX=9606 GN=RTN3 PE=1 SV=2		1.6		1.6	|NA||NA	1.6	0	0
P55265	1097	ADAR	DSRAD_HUMAN Double-stranded RNA-specific adenosine deaminase OS=Homo sapiens OX=9606 GN=ADAR PE=1 SV=4			1.6		||NA|	1.6	NA	#VALUE!
P39656	60	DDOST	OST48_HUMAN Dolichyl-diphosphooligosaccharide--protein glycosyltransferase 48 kDa subunit OS=Homo sapiens OX=9606 GN=DDOST PE=1 SV=4			1.85	1.35	||NA|NA	1.6	0.35355	22.0969
Q9Y2L1	788	DIS3	RRP44_HUMAN Exosome complex exonuclease RRP44 OS=Homo sapiens OX=9606 GN=DIS3 PE=1 SV=2	1.04	1.975	1.5	1.88	NA|0.48187|0.36638|0.36592	1.59875	0.42529	26.6014
P27694	175	RPA1	RFA1_HUMAN Replication protein A 70 kDa DNA-binding subunit OS=Homo sapiens OX=9606 GN=RPA1 PE=1 SV=2	1.595	1.68	1.145	1.97	0.78489|0.75871|0.27577|0.71891	1.5975	0.34172	21.3909
Q96AC1	134	FERMT2	FERM2_HUMAN Fermitin family homolog 2 OS=Homo sapiens OX=9606 GN=FERMT2 PE=1 SV=1	1.72		1.47		NA||0.0|	1.595	0.17678	11.0834
P54136	438	RARS1	SYRC_HUMAN Arginine--tRNA ligase, cytoplasmic OS=Homo sapiens OX=9606 GN=RARS1 PE=1 SV=2	1.64			1.55	0.72666|||NA	1.595	0.06364	3.98997
Q5JTH9	59	RRP12	RRP12_HUMAN RRP12-like protein OS=Homo sapiens OX=9606 GN=RRP12 PE=1 SV=2		1.89		1.3	|NA||NA	1.595	0.41719	26.1561
Q9BXW7	334	HDHD5	HDHD5_HUMAN Haloacid dehalogenase-like hydrolase domain-containing 5 OS=Homo sapiens OX=9606 GN=HDHD5 PE=1 SV=1			1.65	1.54	||0.11314|NA	1.595	0.07778	4.87649
O75153	561	CLUH	CLU_HUMAN Clustered mitochondria protein homolog OS=Homo sapiens OX=9606 GN=CLUH PE=1 SV=2	1.59	1.62	1.88	1.28	NA|NA|NA|NA	1.5925	0.24568	15.4273
Q9NPL8	124	TIMMDC1	TIDC1_HUMAN Complex I assembly factor TIMMDC1, mitochondrial OS=Homo sapiens OX=9606 GN=TIMMDC1 PE=1 SV=2	1.59				NA|||	1.59	NA	#VALUE!
Q14671	1075	PUM1	PUM1_HUMAN Pumilio homolog 1 OS=Homo sapiens OX=9606 GN=PUM1 PE=1 SV=3	1.59				NA|||	1.59	NA	#VALUE!
P00558	63	PGK1	PGK1_HUMAN Phosphoglycerate kinase 1 OS=Homo sapiens OX=9606 GN=PGK1 PE=1 SV=3		1.59			|NA||	1.59	NA	#VALUE!
Q9Y2R5	79	MRPS17	RT17_HUMAN 28S ribosomal protein S17, mitochondrial OS=Homo sapiens OX=9606 GN=MRPS17 PE=1 SV=1		1.52	1.66		|NA|NA|	1.59	0.09899	6.22579
P62195	90	PSMC5	PRS8_HUMAN 26S proteasome regulatory subunit 8 OS=Homo sapiens OX=9606 GN=PSMC5 PE=1 SV=1			1.59		||NA|	1.59	NA	#VALUE!
P17844	62	DDX5	DDX5_HUMAN Probable ATP-dependent RNA helicase DDX5 OS=Homo sapiens OX=9606 GN=DDX5 PE=1 SV=1			1.59	1.59	||0.56569|0.31005	1.59	0	0
P16989	282	YBX3	YBOX3_HUMAN Y-box-binding protein 3 OS=Homo sapiens OX=9606 GN=YBX3 PE=1 SV=4				1.59	|||NA	1.59	NA	#VALUE!
P60900	68	PSMA6	PSA6_HUMAN Proteasome subunit alpha type-6 OS=Homo sapiens OX=9606 GN=PSMA6 PE=1 SV=1				1.59	|||NA	1.59	NA	#VALUE!
P31040	198	SDHA	SDHA_HUMAN Succinate dehydrogenase [ubiquinone] flavoprotein subunit, mitochondrial OS=Homo sapiens OX=9606 GN=SDHA PE=1 SV=2	1.3	1.72	2.06	1.275	0.13115|0.09452|1.06066|0.65761	1.58875	0.37466	23.5821
P26640	705	VARS1	SYVC_HUMAN Valine--tRNA ligase OS=Homo sapiens OX=9606 GN=VARS1 PE=1 SV=4	1.585				1.54856|||	1.585	NA	#VALUE!
P42771	123	CDKN2A	CDN2A_HUMAN Cyclin-dependent kinase inhibitor 2A OS=Homo sapiens OX=9606 GN=CDKN2A PE=1 SV=2	1.715	2.2	0.84		0.78489|0.96167|0.09238|	1.585	0.68926	43.4864
Q16891	429	IMMT	MIC60_HUMAN MICOS complex subunit MIC60 OS=Homo sapiens OX=9606 GN=IMMT PE=1 SV=1		2.36		0.81	|NA||NA	1.585	1.09602	69.1495
P04843	397	RPN1	RPN1_HUMAN Dolichyl-diphosphooligosaccharide--protein glycosyltransferase subunit 1 OS=Homo sapiens OX=9606 GN=RPN1 PE=1 SV=1	1.835	1.53	1.47	1.5	0.16263|0.34176|0.45702|0.55781	1.58375	0.16928	10.6886
Q15029	538	EFTUD2	U5S1_HUMAN 116 kDa U5 small nuclear ribonucleoprotein component OS=Homo sapiens OX=9606 GN=EFTUD2 PE=1 SV=1	2.08	1.86	1.26	1.13	0.31415|0.66063|0.27629|0.35124	1.5825	0.45945	29.0332
Q13561	310	DCTN2	DCTN2_HUMAN Dynactin subunit 2 OS=Homo sapiens OX=9606 GN=DCTN2 PE=1 SV=4			1.58		||0.21213|	1.58	NA	#VALUE!
P07237	41	P4HB	PDIA1_HUMAN Protein disulfide-isomerase OS=Homo sapiens OX=9606 GN=P4HB PE=1 SV=3			1.58		||0.0|	1.58	NA	#VALUE!
P24928	620	POLR2A	RPB1_HUMAN DNA-directed RNA polymerase II subunit RPB1 OS=Homo sapiens OX=9606 GN=POLR2A PE=1 SV=2				1.58	|||NA	1.58	NA	#VALUE!
Q8N1G4	200	LRRC47	LRC47_HUMAN Leucine-rich repeat-containing protein 47 OS=Homo sapiens OX=9606 GN=LRRC47 PE=1 SV=1				1.58	|||NA	1.58	NA	#VALUE!
Q7KZF4	475	SND1	SND1_HUMAN Staphylococcal nuclease domain-containing protein 1 OS=Homo sapiens OX=9606 GN=SND1 PE=1 SV=1	1.755	1.4			0.72832|NA||	1.5775	0.25102	15.9125
P47897	97	QARS1	SYQ_HUMAN Glutamine--tRNA ligase OS=Homo sapiens OX=9606 GN=QARS1 PE=1 SV=1	1.78			1.37	NA|||0.0	1.575	0.28991	18.407
P07197	253	NEFM	NFM_HUMAN Neurofilament medium polypeptide OS=Homo sapiens OX=9606 GN=NEFM PE=1 SV=3		1.86		1.29	|NA||NA	1.575	0.40305	25.5905
P08243	103	ASNS	ASNS_HUMAN Asparagine synthetase [glutamine-hydrolyzing] OS=Homo sapiens OX=9606 GN=ASNS PE=1 SV=4			1.04	2.11	||0.13796|NA	1.575	0.7566	48.0381
P17844	158	DDX5	DDX5_HUMAN Probable ATP-dependent RNA helicase DDX5 OS=Homo sapiens OX=9606 GN=DDX5 PE=1 SV=1		1.73	1.34	1.65	|0.40612|0.3677|0.38184	1.57333	0.20599	13.0926
P49736	210	MCM2	MCM2_HUMAN DNA replication licensing factor MCM2 OS=Homo sapiens OX=9606 GN=MCM2 PE=1 SV=4	1.48			1.665	NA|||0.3182	1.5725	0.13081	8.3186
P18583	939	SON	SON_HUMAN Protein SON OS=Homo sapiens OX=9606 GN=SON PE=1 SV=4		1.57			|0.0||	1.57	NA	#VALUE!
P49915	596	GMPS	GUAA_HUMAN GMP synthase [glutamine-hydrolyzing] OS=Homo sapiens OX=9606 GN=GMPS PE=1 SV=1		1.28		1.86	|NA||NA	1.57	0.41012	26.1223
P35998	197	PSMC2	PRS7_HUMAN 26S proteasome regulatory subunit 7 OS=Homo sapiens OX=9606 GN=PSMC2 PE=1 SV=3		1.57			|NA||	1.57	NA	#VALUE!
P33993	105	MCM7	MCM7_HUMAN DNA replication licensing factor MCM7 OS=Homo sapiens OX=9606 GN=MCM7 PE=1 SV=4		1.16	1.98		|0.5374|NA|	1.57	0.57983	36.9318
P61956	17	SUMO2	SUMO2_HUMAN Small ubiquitin-related modifier 2 OS=Homo sapiens OX=9606 GN=SUMO2 PE=1 SV=3				1.57	|||0.31113	1.57	NA	#VALUE!
P12074	66	COX6A1	CX6A1_HUMAN Cytochrome c oxidase subunit 6A1, mitochondrial OS=Homo sapiens OX=9606 GN=COX6A1 PE=1 SV=4				1.57	|||NA	1.57	NA	#VALUE!
P27144	38	AK4	KAD4_HUMAN Adenylate kinase 4, mitochondrial OS=Homo sapiens OX=9606 GN=AK4 PE=1 SV=1				1.57	|||NA	1.57	NA	#VALUE!
P49327	1249	FASN	FAS_HUMAN Fatty acid synthase OS=Homo sapiens OX=9606 GN=FASN PE=1 SV=3	1.66	1.625	1.34	1.65	NA|0.68589|NA|0.57808	1.56875	0.15321	9.76637
P53007	78	SLC25A1	TXTP_HUMAN Tricarboxylate transport protein, mitochondrial OS=Homo sapiens OX=9606 GN=SLC25A1 PE=1 SV=2	2.21		1.965	0.52	1.1738||0.16263|NA	1.565	0.91325	58.3546
Q96A33	171	CCDC47	CCD47_HUMAN Coiled-coil domain-containing protein 47 OS=Homo sapiens OX=9606 GN=CCDC47 PE=1 SV=1	2.05	1.08			NA|0.25146||	1.565	0.68589	43.8268
Q9UNQ2	311	DIMT1	DIM1_HUMAN Probable dimethyladenosine transferase OS=Homo sapiens OX=9606 GN=DIMT1 PE=1 SV=1	1.14		1.99		NA||NA|	1.565	0.60104	38.4051
O00231	148	PSMD11	PSD11_HUMAN 26S proteasome non-ATPase regulatory subunit 11 OS=Homo sapiens OX=9606 GN=PSMD11 PE=1 SV=3	1.05			2.08	NA|||NA	1.565	0.72832	46.538
Q9BWJ5	23	SF3B5	SF3B5_HUMAN Splicing factor 3B subunit 5 OS=Homo sapiens OX=9606 GN=SF3B5 PE=1 SV=1		1.53		1.6	|0.0||NA	1.565	0.0495	3.16294
Q96QK1	311	VPS35	VPS35_HUMAN Vacuolar protein sorting-associated protein 35 OS=Homo sapiens OX=9606 GN=VPS35 PE=1 SV=2		1.78	1.35		|NA|NA|	1.565	0.30406	19.4288
P13693	10	TPT1	TCTP_HUMAN Translationally-controlled tumor protein OS=Homo sapiens OX=9606 GN=TPT1 PE=1 SV=1		1.97		1.16	|NA||NA	1.565	0.57276	36.5981
Q7L2H7	336	EIF3M	EIF3M_HUMAN Eukaryotic translation initiation factor 3 subunit M OS=Homo sapiens OX=9606 GN=EIF3M PE=1 SV=1			1.75	1.38	||NA|NA	1.565	0.26163	16.7176
P15954	18	COX7C	COX7C_HUMAN Cytochrome c oxidase subunit 7C, mitochondrial OS=Homo sapiens OX=9606 GN=COX7C PE=1 SV=1	1.56				NA|||	1.56	NA	#VALUE!
Q00341	210	HDLBP	VIGLN_HUMAN Vigilin OS=Homo sapiens OX=9606 GN=HDLBP PE=1 SV=2	1.56				NA|||	1.56	NA	#VALUE!
Q9UQ35	969	SRRM2	SRRM2_HUMAN Serine/arginine repetitive matrix protein 2 OS=Homo sapiens OX=9606 GN=SRRM2 PE=1 SV=2			1.56		||NA|	1.56	NA	#VALUE!
Q9NRF8	330	CTPS2	PYRG2_HUMAN CTP synthase 2 OS=Homo sapiens OX=9606 GN=CTPS2 PE=1 SV=1			1.56		||0.0|	1.56	NA	#VALUE!
O60568	717	PLOD3	PLOD3_HUMAN Multifunctional procollagen lysine hydroxylase and glycosyltransferase LH3 OS=Homo sapiens OX=9606 GN=PLOD3 PE=1 SV=1			1.56		||NA|	1.56	NA	#VALUE!
Q08J23	382	NSUN2	NSUN2_HUMAN RNA cytosine C(5)-methyltransferase NSUN2 OS=Homo sapiens OX=9606 GN=NSUN2 PE=1 SV=2			1.56		||NA|	1.56	NA	#VALUE!
P00387	55	CYB5R3	NB5R3_HUMAN NADH-cytochrome b5 reductase 3 OS=Homo sapiens OX=9606 GN=CYB5R3 PE=1 SV=3				1.56	|||NA	1.56	NA	#VALUE!
P30566	442	ADSL	PUR8_HUMAN Adenylosuccinate lyase OS=Homo sapiens OX=9606 GN=ADSL PE=1 SV=2	1.16	1.95			NA|NA||	1.555	0.55861	35.9235
Q9BWJ5	13	SF3B5	SF3B5_HUMAN Splicing factor 3B subunit 5 OS=Homo sapiens OX=9606 GN=SF3B5 PE=1 SV=1			1.16	1.95	||0.0|NA	1.555	0.55861	35.9235
P28288	350	ABCD3	ABCD3_HUMAN ATP-binding cassette sub-family D member 3 OS=Homo sapiens OX=9606 GN=ABCD3 PE=1 SV=1			1.555		||0.20506|	1.555	NA	#VALUE!
A1L0T0	332	ILVBL	HACL2_HUMAN 2-hydroxyacyl-CoA lyase 2 OS=Homo sapiens OX=9606 GN=ILVBL PE=1 SV=2	1.55				NA|||	1.55	NA	#VALUE!
Q9NRZ9	357	HELLS	HELLS_HUMAN Lymphoid-specific helicase OS=Homo sapiens OX=9606 GN=HELLS PE=1 SV=1	1.55				NA|||	1.55	NA	#VALUE!
Q9UHD1	95	CHORDC1	CHRD1_HUMAN Cysteine and histidine-rich domain-containing protein 1 OS=Homo sapiens OX=9606 GN=CHORDC1 PE=1 SV=2		1.55			|NA||	1.55	NA	#VALUE!
Q9Y3F4	232	STRAP	STRAP_HUMAN Serine-threonine kinase receptor-associated protein OS=Homo sapiens OX=9606 GN=STRAP PE=1 SV=1			1.55		||0.28284|	1.55	NA	#VALUE!
Q8NI27	388	THOC2	THOC2_HUMAN THO complex subunit 2 OS=Homo sapiens OX=9606 GN=THOC2 PE=1 SV=2			1.55		||NA|	1.55	NA	#VALUE!
Q7Z6Z7	3350	HUWE1	HUWE1_HUMAN E3 ubiquitin-protein ligase HUWE1 OS=Homo sapiens OX=9606 GN=HUWE1 PE=1 SV=3				1.55	|||NA	1.55	NA	#VALUE!
P17987	69	TCP1	TCPA_HUMAN T-complex protein 1 subunit alpha OS=Homo sapiens OX=9606 GN=TCP1 PE=1 SV=1	1.54	0.93	1.765	1.95	1.07221|NA|0.2192|0.98473	1.54625	0.44372	28.6965
O60763	648	USO1	USO1_HUMAN General vesicular transport factor p115 OS=Homo sapiens OX=9606 GN=USO1 PE=1 SV=2			1.545		||0.30406|	1.545	NA	#VALUE!
Q92887	1414	ABCC2	MRP2_HUMAN Canalicular multispecific organic anion transporter 1 OS=Homo sapiens OX=9606 GN=ABCC2 PE=1 SV=3	1.23		1.85		NA||NA|	1.54	0.43841	28.4682
P35580	208	MYH10	MYH10_HUMAN Myosin-10 OS=Homo sapiens OX=9606 GN=MYH10 PE=1 SV=3	1.54				0.43841|||	1.54	NA	#VALUE!
P00966	167	ASS1	ASSY_HUMAN Argininosuccinate synthase OS=Homo sapiens OX=9606 GN=ASS1 PE=1 SV=2	1.16		1.92		NA||NA|	1.54	0.5374	34.8961
P49750	316	YLPM1	YLPM1_HUMAN YLP motif-containing protein 1 OS=Homo sapiens OX=9606 GN=YLPM1 PE=1 SV=4		1.54			|NA||	1.54	NA	#VALUE!
P23246	252	SFPQ	SFPQ_HUMAN Splicing factor, proline- and glutamine-rich OS=Homo sapiens OX=9606 GN=SFPQ PE=1 SV=2			1.32	1.76	||NA|NA	1.54	0.31113	20.2032
Q9NYK5	305	MRPL39	RM39_HUMAN 39S ribosomal protein L39, mitochondrial OS=Homo sapiens OX=9606 GN=MRPL39 PE=1 SV=3			1.54		||NA|	1.54	NA	#VALUE!
Q92664	86	GTF3A	TF3A_HUMAN Transcription factor IIIA OS=Homo sapiens OX=9606 GN=GTF3A PE=1 SV=3				1.54	|||NA	1.54	NA	#VALUE!
P62910	101	RPL32	RL32_HUMAN 60S ribosomal protein L32 OS=Homo sapiens OX=9606 GN=RPL32 PE=1 SV=2				1.54	|||NA	1.54	NA	#VALUE!
P49327	723	FASN	FAS_HUMAN Fatty acid synthase OS=Homo sapiens OX=9606 GN=FASN PE=1 SV=3	1.84		1.21	1.56	NA||NA|NA	1.53667	0.31565	20.5412
Q7KZF4	201	SND1	SND1_HUMAN Staphylococcal nuclease domain-containing protein 1 OS=Homo sapiens OX=9606 GN=SND1 PE=1 SV=1	1.93	1.24	1.8	1.17	NA|1.08708|NA|1.03016	1.535	0.38579	25.1329
Q9H583	378	HEATR1	HEAT1_HUMAN HEAT repeat-containing protein 1 OS=Homo sapiens OX=9606 GN=HEATR1 PE=1 SV=3		1.89	1.18		|NA|NA|	1.535	0.50205	32.7068
P41227	110	NAA10	NAA10_HUMAN N-alpha-acetyltransferase 10 OS=Homo sapiens OX=9606 GN=NAA10 PE=1 SV=1			0.94	2.13	||NA|NA	1.535	0.84146	54.8182
Q9NSD9	512	FARSB	SYFB_HUMAN Phenylalanine--tRNA ligase beta subunit OS=Homo sapiens OX=9606 GN=FARSB PE=1 SV=3	1.08		1.84	1.68	NA||0.18717|NA	1.53333	0.40067	26.1307
O00410	206	IPO5	IPO5_HUMAN Importin-5 OS=Homo sapiens OX=9606 GN=IPO5 PE=1 SV=4	1.66		1.3	1.635	NA||NA|0.03536	1.53167	0.20102	13.1242
Q7Z6Z7	1085	HUWE1	HUWE1_HUMAN E3 ubiquitin-protein ligase HUWE1 OS=Homo sapiens OX=9606 GN=HUWE1 PE=1 SV=3	1.27		1.46	1.86	NA||NA|0.79674	1.53	0.30116	19.6837
P48444	46	ARCN1	COPD_HUMAN Coatomer subunit delta OS=Homo sapiens OX=9606 GN=ARCN1 PE=1 SV=1	2.01	0.84	1.74		NA|NA|NA|	1.53	0.61262	40.0405
P49959	397	MRE11	MRE11_HUMAN Double-strand break repair protein MRE11 OS=Homo sapiens OX=9606 GN=MRE11 PE=1 SV=3	1.26			1.8	0.0|||0.41012	1.53	0.38184	24.9569
P48556	209	PSMD8	PSMD8_HUMAN 26S proteasome non-ATPase regulatory subunit 8 OS=Homo sapiens OX=9606 GN=PSMD8 PE=1 SV=2			1.53		||NA|	1.53	NA	#VALUE!
Q1KMD3	728	HNRNPUL2	HNRL2_HUMAN Heterogeneous nuclear ribonucleoprotein U-like protein 2 OS=Homo sapiens OX=9606 GN=HNRNPUL2 PE=1 SV=1				1.53	|||NA	1.53	NA	#VALUE!
Q9Y399	69	MRPS2	RT02_HUMAN 28S ribosomal protein S2, mitochondrial OS=Homo sapiens OX=9606 GN=MRPS2 PE=1 SV=1				1.53	|||NA	1.53	NA	#VALUE!
Q00610	197	CLTC	CLH1_HUMAN Clathrin heavy chain 1 OS=Homo sapiens OX=9606 GN=CLTC PE=1 SV=5	1.655		0.98	1.95	0.40779||NA|NA	1.52833	0.49725	32.5355
Q9UQE7	66	SMC3	SMC3_HUMAN Structural maintenance of chromosomes protein 3 OS=Homo sapiens OX=9606 GN=SMC3 PE=1 SV=2		1.43	1.325	1.83	|0.39598|0.82731|0.27135	1.52833	0.26647	17.4354
O75390	347	CS	CISY_HUMAN Citrate synthase, mitochondrial OS=Homo sapiens OX=9606 GN=CS PE=1 SV=2	0.89		2.165		NA||1.06773|	1.5275	0.90156	59.0219
Q13435	175	SF3B2	SF3B2_HUMAN Splicing factor 3B subunit 2 OS=Homo sapiens OX=9606 GN=SF3B2 PE=1 SV=2	1.06		1.99		NA||NA|	1.525	0.65761	43.122
O14980	844	XPO1	XPO1_HUMAN Exportin-1 OS=Homo sapiens OX=9606 GN=XPO1 PE=1 SV=1			1.76	1.29	||0.31113|0.47773	1.525	0.33234	21.7928
O75569	138	PRKRA	PRKRA_HUMAN Interferon-inducible double-stranded RNA-dependent protein kinase activator A OS=Homo sapiens OX=9606 GN=PRKRA PE=1 SV=1			1.28	1.77	||0.0|0.22627	1.525	0.34648	22.72
P49368	226	CCT3	TCPG_HUMAN T-complex protein 1 subunit gamma OS=Homo sapiens OX=9606 GN=CCT3 PE=1 SV=4	1.975	1.18	1.55	1.38	0.75633|NA|NA|0.47343	1.52125	0.33819	22.2311
P13010	188	XRCC5	XRCC5_HUMAN X-ray repair cross-complementing protein 5 OS=Homo sapiens OX=9606 GN=XRCC5 PE=1 SV=3	1.32		1.72		NA||NA|	1.52	0.28284	18.6079
P13639	769	EEF2	EF2_HUMAN Elongation factor 2 OS=Homo sapiens OX=9606 GN=EEF2 PE=1 SV=4	0.97	1.28	2.31		NA|NA|NA|	1.52	0.7015	46.1513
Q8NFQ8	101	TOR1AIP2	TOIP2_HUMAN Torsin-1A-interacting protein 2 OS=Homo sapiens OX=9606 GN=TOR1AIP2 PE=1 SV=1		1.52			|NA||	1.52	NA	#VALUE!
Q8IZ83	574	ALDH16A1	A16A1_HUMAN Aldehyde dehydrogenase family 16 member A1 OS=Homo sapiens OX=9606 GN=ALDH16A1 PE=1 SV=2			1.52		||NA|	1.52	NA	#VALUE!
P54577	381	YARS1	SYYC_HUMAN Tyrosine--tRNA ligase, cytoplasmic OS=Homo sapiens OX=9606 GN=YARS1 PE=1 SV=4			1.49	1.55	||NA|NA	1.52	0.04243	2.79145
Q8NEY8	169	PPHLN1	PPHLN_HUMAN Periphilin-1 OS=Homo sapiens OX=9606 GN=PPHLN1 PE=1 SV=2				1.52	|||NA	1.52	NA	#VALUE!
P11586	201	MTHFD1	C1TC_HUMAN C-1-tetrahydrofolate synthase, cytoplasmic OS=Homo sapiens OX=9606 GN=MTHFD1 PE=1 SV=3				1.52	|||NA	1.52	NA	#VALUE!
Q8N726	26	CDKN2A	ARF_HUMAN Tumor suppressor ARF OS=Homo sapiens OX=9606 GN=CDKN2A PE=1 SV=2				1.52	|||NA	1.52	NA	#VALUE!
Q6P2E9	1378	EDC4	EDC4_HUMAN Enhancer of mRNA-decapping protein 4 OS=Homo sapiens OX=9606 GN=EDC4 PE=1 SV=1				1.52	|||NA	1.52	NA	#VALUE!
P49755	82	TMED10	TMEDA_HUMAN Transmembrane emp24 domain-containing protein 10 OS=Homo sapiens OX=9606 GN=TMED10 PE=1 SV=2	1.93		0.57	2.05	1.56978||NA|NA	1.51667	0.82203	54.1997
O15067	146	PFAS	PUR4_HUMAN Phosphoribosylformylglycinamidine synthase OS=Homo sapiens OX=9606 GN=PFAS PE=1 SV=4	1.57	1.49	1.49		0.36474|1.26374|0.11314|	1.51667	0.04619	3.04549
P49257	444	LMAN1	LMAN1_HUMAN Protein ERGIC-53 OS=Homo sapiens OX=9606 GN=LMAN1 PE=1 SV=2			1.55	1.48	||0.16971|0.09899	1.515	0.0495	3.26733
Q9NYF8	263	BCLAF1	BCLF1_HUMAN Bcl-2-associated transcription factor 1 OS=Homo sapiens OX=9606 GN=BCLAF1 PE=1 SV=2	1.34	2.05		1.15	NA|NA||0.53116	1.51333	0.47438	31.3468
Q13148	256	TARDBP	TADBP_HUMAN TAR DNA-binding protein 43 OS=Homo sapiens OX=9606 GN=TARDBP PE=1 SV=1		1.69		1.33	|NA||NA	1.51	0.25456	16.8583
Q09028	123	RBBP4	RBBP4_HUMAN Histone-binding protein RBBP4 OS=Homo sapiens OX=9606 GN=RBBP4 PE=1 SV=3			1.16	1.86	||0.0|0.14142	1.51	0.49497	32.7795
Q16576	122	RBBP7	RBBP7_HUMAN Histone-binding protein RBBP7 OS=Homo sapiens OX=9606 GN=RBBP7 PE=1 SV=1			1.16	1.86	||0.0|0.14142	1.51	0.49497	32.7795
O43390	280	HNRNPR	HNRPR_HUMAN Heterogeneous nuclear ribonucleoprotein R OS=Homo sapiens OX=9606 GN=HNRNPR PE=1 SV=1			1.38	1.64	||NA|0.0	1.51	0.18385	12.1755
Q92616	1751	GCN1	GCN1_HUMAN eIF-2-alpha kinase activator GCN1 OS=Homo sapiens OX=9606 GN=GCN1 PE=1 SV=6				1.51	|||NA	1.51	NA	#VALUE!
Q12972	77	PPP1R8	PP1R8_HUMAN Nuclear inhibitor of protein phosphatase 1 OS=Homo sapiens OX=9606 GN=PPP1R8 PE=1 SV=2	1.5				NA|||	1.5	NA	#VALUE!
Q9ULC4	94	MCTS1	MCTS1_HUMAN Malignant T-cell-amplified sequence 1 OS=Homo sapiens OX=9606 GN=MCTS1 PE=1 SV=1		1.96	1.045	1.495	|0.0|0.16263|0.43134	1.5	0.45752	30.5013
P15374	153	UCHL3	UCHL3_HUMAN Ubiquitin carboxyl-terminal hydrolase isozyme L3 OS=Homo sapiens OX=9606 GN=UCHL3 PE=1 SV=1			1.41	1.59	||0.39598|0.0	1.5	0.12728	8.48533
Q8N5M9	19	JAGN1	JAGN1_HUMAN Protein jagunal homolog 1 OS=Homo sapiens OX=9606 GN=JAGN1 PE=1 SV=1				1.5	|||NA	1.5	NA	#VALUE!
P49327	1093	FASN	FAS_HUMAN Fatty acid synthase OS=Homo sapiens OX=9606 GN=FASN PE=1 SV=3				1.5	|||0.0	1.5	NA	#VALUE!
P34897	254	SHMT2	GLYM_HUMAN Serine hydroxymethyltransferase, mitochondrial OS=Homo sapiens OX=9606 GN=SHMT2 PE=1 SV=3				1.5	|||NA	1.5	NA	#VALUE!
Q9Y2L1	902	DIS3	RRP44_HUMAN Exosome complex exonuclease RRP44 OS=Homo sapiens OX=9606 GN=DIS3 PE=1 SV=2				1.5	|||NA	1.5	NA	#VALUE!
Q15691	69	MAPRE1	MARE1_HUMAN Microtubule-associated protein RP/EB family member 1 OS=Homo sapiens OX=9606 GN=MAPRE1 PE=1 SV=3		2.105	0.89		|0.79903|NA|	1.4975	0.85913	57.371
P13804	242	ETFA	ETFA_HUMAN Electron transfer flavoprotein subunit alpha, mitochondrial OS=Homo sapiens OX=9606 GN=ETFA PE=1 SV=1	1.55		1.44		0.0||NA|	1.495	0.07778	5.20268
O00154	281	ACOT7	BACH_HUMAN Cytosolic acyl coenzyme A thioester hydrolase OS=Homo sapiens OX=9606 GN=ACOT7 PE=1 SV=3		1.625		1.36	|0.38891||NA	1.4925	0.18738	12.5548
Q13616	727	CUL1	CUL1_HUMAN Cullin-1 OS=Homo sapiens OX=9606 GN=CUL1 PE=1 SV=2	2.26			0.72	0.0|||NA	1.49	1.08894	73.0832
Q96EA4	136	SPDL1	SPDLY_HUMAN Protein Spindly OS=Homo sapiens OX=9606 GN=SPDL1 PE=1 SV=2	1.49				NA|||	1.49	NA	#VALUE!
Q00536	372	CDK16	CDK16_HUMAN Cyclin-dependent kinase 16 OS=Homo sapiens OX=9606 GN=CDK16 PE=1 SV=1	1.49				0.73539|||	1.49	NA	#VALUE!
Q6NVY1	343	HIBCH	HIBCH_HUMAN 3-hydroxyisobutyryl-CoA hydrolase, mitochondrial OS=Homo sapiens OX=9606 GN=HIBCH PE=1 SV=2			1.49		||NA|	1.49	NA	#VALUE!
P36542	145	ATP5F1C	ATPG_HUMAN ATP synthase subunit gamma, mitochondrial OS=Homo sapiens OX=9606 GN=ATP5F1C PE=1 SV=1			2.43	0.55	||NA|NA	1.49	1.32936	89.2188
O43615	236	TIMM44	TIM44_HUMAN Mitochondrial import inner membrane translocase subunit TIM44 OS=Homo sapiens OX=9606 GN=TIMM44 PE=1 SV=2			1.23	1.75	||NA|NA	1.49	0.3677	24.6779
Q9HAV4	65	XPO5	XPO5_HUMAN Exportin-5 OS=Homo sapiens OX=9606 GN=XPO5 PE=1 SV=1			1.18	1.8	||NA|NA	1.49	0.43841	29.4235
P08621	230	SNRNP70	RU17_HUMAN U1 small nuclear ribonucleoprotein 70 kDa OS=Homo sapiens OX=9606 GN=SNRNP70 PE=1 SV=2				1.49	|||NA	1.49	NA	#VALUE!
Q09161	597	NCBP1	NCBP1_HUMAN Nuclear cap-binding protein subunit 1 OS=Homo sapiens OX=9606 GN=NCBP1 PE=1 SV=1				1.49	|||NA	1.49	NA	#VALUE!
Q99643	134	SDHC	C560_HUMAN Succinate dehydrogenase cytochrome b560 subunit, mitochondrial OS=Homo sapiens OX=9606 GN=SDHC PE=1 SV=1				1.49	|||NA	1.49	NA	#VALUE!
P35580	777	MYH10	MYH10_HUMAN Myosin-10 OS=Homo sapiens OX=9606 GN=MYH10 PE=1 SV=3	0.68	2.46	1.395	1.42	NA|1.55861|1.04796|0.21213	1.48875	0.73278	49.2212
P35579	770	MYH9	MYH9_HUMAN Myosin-9 OS=Homo sapiens OX=9606 GN=MYH9 PE=1 SV=4	0.68	2.46	1.395	1.42	NA|1.55861|1.04796|0.21213	1.48875	0.73278	49.2212
Q00610	1335	CLTC	CLH1_HUMAN Clathrin heavy chain 1 OS=Homo sapiens OX=9606 GN=CLTC PE=1 SV=5	1.785	1.08	1.205	1.88	0.33234|NA|0.16263|0.57134	1.4875	0.4035	27.1261
O75643	1863	SNRNP200	U520_HUMAN U5 small nuclear ribonucleoprotein 200 kDa helicase OS=Homo sapiens OX=9606 GN=SNRNP200 PE=1 SV=2			0.7	2.275	||0.03464|0.06364	1.4875	1.11369	74.8699
P52209	152	PGD	6PGD_HUMAN 6-phosphogluconate dehydrogenase, decarboxylating OS=Homo sapiens OX=9606 GN=PGD PE=1 SV=3				1.485	|||0.24749	1.485	NA	#VALUE!
P78527	1418	PRKDC	PRKDC_HUMAN DNA-dependent protein kinase catalytic subunit OS=Homo sapiens OX=9606 GN=PRKDC PE=1 SV=3	1.855	1.595	1.01	1.465	0.64347|0.64347|0.37668|0.52106	1.48125	0.35354	23.8677
Q9Y3F4	142	STRAP	STRAP_HUMAN Serine-threonine kinase receptor-associated protein OS=Homo sapiens OX=9606 GN=STRAP PE=1 SV=1	1.48				NA|||	1.48	NA	#VALUE!
P50148	109	GNAQ	GNAQ_HUMAN Guanine nucleotide-binding protein G(q) subunit alpha OS=Homo sapiens OX=9606 GN=GNAQ PE=1 SV=4	1.48				NA|||	1.48	NA	#VALUE!
O43852	272	CALU	CALU_HUMAN Calumenin OS=Homo sapiens OX=9606 GN=CALU PE=1 SV=2	1.48				NA|||	1.48	NA	#VALUE!
Q9Y6I9	152	TEX264	TX264_HUMAN Testis-expressed protein 264 OS=Homo sapiens OX=9606 GN=TEX264 PE=1 SV=1	1.48				NA|||	1.48	NA	#VALUE!
O43175	328	PHGDH	SERA_HUMAN D-3-phosphoglycerate dehydrogenase OS=Homo sapiens OX=9606 GN=PHGDH PE=1 SV=4	1.8		1.16		NA||0.43841|	1.48	0.45255	30.5777
P62191	277	PSMC1	PRS4_HUMAN 26S proteasome regulatory subunit 4 OS=Homo sapiens OX=9606 GN=PSMC1 PE=1 SV=1		1.03		1.93	|NA||NA	1.48	0.6364	43
P00558	125	PGK1	PGK1_HUMAN Phosphoglycerate kinase 1 OS=Homo sapiens OX=9606 GN=PGK1 PE=1 SV=3			1.48		||NA|	1.48	NA	#VALUE!
Q14677	261	CLINT1	EPN4_HUMAN Clathrin interactor 1 OS=Homo sapiens OX=9606 GN=CLINT1 PE=1 SV=1			1.48		||NA|	1.48	NA	#VALUE!
P40227	71	CCT6A	TCPZ_HUMAN T-complex protein 1 subunit zeta OS=Homo sapiens OX=9606 GN=CCT6A PE=1 SV=3				1.48	|||NA	1.48	NA	#VALUE!
P12268	507	IMPDH2	IMDH2_HUMAN Inosine-5'-monophosphate dehydrogenase 2 OS=Homo sapiens OX=9606 GN=IMPDH2 PE=1 SV=2	2.11	1.665	0.86	1.28	0.61817|0.46022|0.37581|0.24751	1.47875	0.53402	36.1129
P36776	451	LONP1	LONM_HUMAN Lon protease homolog, mitochondrial OS=Homo sapiens OX=9606 GN=LONP1 PE=1 SV=2	1.62	1.99	1.14	1.16	NA|NA|0.0|0.11314	1.4775	0.4073	27.5668
P49327	350	FASN	FAS_HUMAN Fatty acid synthase OS=Homo sapiens OX=9606 GN=FASN PE=1 SV=3			1.135	1.82	||0.24749|NA	1.4775	0.48437	32.7831
P51571	94	SSR4	SSRD_HUMAN Translocon-associated protein subunit delta OS=Homo sapiens OX=9606 GN=SSR4 PE=1 SV=1	1.95	0.86		1.62	NA|NA||NA	1.47667	0.55896	37.8527
P62826	53	RAN	RAN_HUMAN GTP-binding nuclear protein Ran OS=Homo sapiens OX=9606 GN=RAN PE=1 SV=3		2.17		0.78	|NA||NA	1.475	0.98288	66.6359
P49327	1530	FASN	FAS_HUMAN Fatty acid synthase OS=Homo sapiens OX=9606 GN=FASN PE=1 SV=3			1.37	1.58	||0.07506|NA	1.475	0.14849	10.0671
Q05519	200	SRSF11	SRS11_HUMAN Serine/arginine-rich splicing factor 11 OS=Homo sapiens OX=9606 GN=SRSF11 PE=1 SV=1	1.39		1.57	1.46	NA||NA|0.41012	1.47333	0.09074	6.15884
P32969	40	RPL9	RL9_HUMAN 60S ribosomal protein L9 OS=Homo sapiens OX=9606 GN=RPL9 PE=1 SV=1	1.38	1.65	1.08	1.78	NA|0.68178|0.62963|0.0	1.4725	0.3102	21.0662
O00193	8	SMAP	SMAP_HUMAN Small acidic protein OS=Homo sapiens OX=9606 GN=SMAP PE=1 SV=1	1.61		1.06	1.74	NA||NA|NA	1.47	0.36097	24.5558
Q14151	850	SAFB2	SAFB2_HUMAN Scaffold attachment factor B2 OS=Homo sapiens OX=9606 GN=SAFB2 PE=1 SV=1	1.47				NA|||	1.47	NA	#VALUE!
P14866	564	HNRNPL	HNRPL_HUMAN Heterogeneous nuclear ribonucleoprotein L OS=Homo sapiens OX=9606 GN=HNRNPL PE=1 SV=2		1.17		1.77	|0.1106||0.0	1.47	0.42426	28.8612
P78347	498	GTF2I	GTF2I_HUMAN General transcription factor II-I OS=Homo sapiens OX=9606 GN=GTF2I PE=1 SV=2		1.47			|NA||	1.47	NA	#VALUE!
P82664	183	MRPS10	RT10_HUMAN 28S ribosomal protein S10, mitochondrial OS=Homo sapiens OX=9606 GN=MRPS10 PE=1 SV=2			1.47		||NA|	1.47	NA	#VALUE!
Q14697	942	GANAB	GANAB_HUMAN Neutral alpha-glucosidase AB OS=Homo sapiens OX=9606 GN=GANAB PE=1 SV=3				1.47	|||NA	1.47	NA	#VALUE!
P78344	224	EIF4G2	IF4G2_HUMAN Eukaryotic translation initiation factor 4 gamma 2 OS=Homo sapiens OX=9606 GN=EIF4G2 PE=1 SV=1	1.49		1.87	1.04	NA||NA|0.14142	1.46667	0.41549	28.3288
O43598	56	DNPH1	DNPH1_HUMAN 2'-deoxynucleoside 5'-phosphate N-hydrolase 1 OS=Homo sapiens OX=9606 GN=DNPH1 PE=1 SV=1	1.115	1.82	1.87	1.06	0.71418|NA|NA|NA	1.46625	0.43839	29.8987
Q96T88	37	UHRF1	UHRF1_HUMAN E3 ubiquitin-protein ligase UHRF1 OS=Homo sapiens OX=9606 GN=UHRF1 PE=1 SV=1	1.5		1.43		NA||0.28284|	1.465	0.0495	3.37884
P53634	241	CTSC	CATC_HUMAN Dipeptidyl peptidase 1 OS=Homo sapiens OX=9606 GN=CTSC PE=1 SV=2	1.39	2	1.26	1.2	0.04243|NA|0.12055|0.14142	1.4625	0.367	25.094
P39023	165	RPL3	RL3_HUMAN 60S ribosomal protein L3 OS=Homo sapiens OX=9606 GN=RPL3 PE=1 SV=2		1.47	1.455		|NA|0.13435|	1.4625	0.01061	0.72547
Q14690	658	PDCD11	RRP5_HUMAN Protein RRP5 homolog OS=Homo sapiens OX=9606 GN=PDCD11 PE=1 SV=3	0.78	2.21	1.59	1.26	NA|NA|NA|0.07071	1.46	0.6005	41.1301
P98179	81	RBM3	RBM3_HUMAN RNA-binding protein 3 OS=Homo sapiens OX=9606 GN=RBM3 PE=1 SV=1		1.46			|NA||	1.46	NA	#VALUE!
Q32NC0	5	C18orf21	CR021_HUMAN UPF0711 protein C18orf21 OS=Homo sapiens OX=9606 GN=C18orf21 PE=1 SV=1			1.46		||NA|	1.46	NA	#VALUE!
Q13428	16	TCOF1	TCOF_HUMAN Treacle protein OS=Homo sapiens OX=9606 GN=TCOF1 PE=1 SV=3			1.46		||NA|	1.46	NA	#VALUE!
O75122	384	CLASP2	CLAP2_HUMAN CLIP-associating protein 2 OS=Homo sapiens OX=9606 GN=CLASP2 PE=1 SV=3				1.46	|||0.15556	1.46	NA	#VALUE!
Q8N0Z9	43	VSIG10	VSI10_HUMAN V-set and immunoglobulin domain-containing protein 10 OS=Homo sapiens OX=9606 GN=VSIG10 PE=2 SV=1				1.46	|||NA	1.46	NA	#VALUE!
Q15024	55	EXOSC7	EXOS7_HUMAN Exosome complex component RRP42 OS=Homo sapiens OX=9606 GN=EXOSC7 PE=1 SV=3				1.46	|||NA	1.46	NA	#VALUE!
Q86VP6	1051	CAND1	CAND1_HUMAN Cullin-associated NEDD8-dissociated protein 1 OS=Homo sapiens OX=9606 GN=CAND1 PE=1 SV=2	2.13			0.78	NA|||0.0	1.455	0.95459	65.6076
P25705	306	ATP5F1A	ATPA_HUMAN ATP synthase subunit alpha, mitochondrial OS=Homo sapiens OX=9606 GN=ATP5F1A PE=1 SV=1	0.6	1.39	1.63	2.2	NA|0.65531|0.42867|NA	1.455	0.66355	45.6048
P69905	46	HBA1	HBA_HUMAN Hemoglobin subunit alpha OS=Homo sapiens OX=9606 GN=HBA1 PE=1 SV=2		1.3		1.61	|0.0||NA	1.455	0.2192	15.0653
Q96PK6	58	RBM14	RBM14_HUMAN RNA-binding protein 14 OS=Homo sapiens OX=9606 GN=RBM14 PE=1 SV=2	1.88		1.71	0.77	NA||NA|NA	1.45333	0.59786	41.1373
Q9H7S9	480	ZNF703	ZN703_HUMAN Zinc finger protein 703 OS=Homo sapiens OX=9606 GN=ZNF703 PE=1 SV=1	1.39	1.205	1.755		0.68017|0.30406|0.70004|	1.45	0.27987	19.3014
Q13151	166	HNRNPA0	ROA0_HUMAN Heterogeneous nuclear ribonucleoprotein A0 OS=Homo sapiens OX=9606 GN=HNRNPA0 PE=1 SV=1		1.64	1.26		|NA|NA|	1.45	0.2687	18.531
Q14203	1136	DCTN1	DCTN1_HUMAN Dynactin subunit 1 OS=Homo sapiens OX=9606 GN=DCTN1 PE=1 SV=3		1.31	1.59		|0.59397|NA|	1.45	0.19799	13.6545
P33991	420	MCM4	MCM4_HUMAN DNA replication licensing factor MCM4 OS=Homo sapiens OX=9606 GN=MCM4 PE=1 SV=5			1.19	1.71	||0.4337|NA	1.45	0.3677	25.3586
Q92841	504	DDX17	DDX17_HUMAN Probable ATP-dependent RNA helicase DDX17 OS=Homo sapiens OX=9606 GN=DDX17 PE=1 SV=2				1.45	|||NA	1.45	NA	#VALUE!
P84085	80	ARF5	ARF5_HUMAN ADP-ribosylation factor 5 OS=Homo sapiens OX=9606 GN=ARF5 PE=1 SV=2				1.45	|||0.0	1.45	NA	#VALUE!
P84077	80	ARF1	ARF1_HUMAN ADP-ribosylation factor 1 OS=Homo sapiens OX=9606 GN=ARF1 PE=1 SV=2				1.45	|||0.0	1.45	NA	#VALUE!
P18085	80	ARF4	ARF4_HUMAN ADP-ribosylation factor 4 OS=Homo sapiens OX=9606 GN=ARF4 PE=1 SV=3				1.45	|||0.0	1.45	NA	#VALUE!
P53396	135	ACLY	ACLY_HUMAN ATP-citrate synthase OS=Homo sapiens OX=9606 GN=ACLY PE=1 SV=3	1.67		1.225		NA||0.06364|	1.4475	0.31466	21.7382
Q9BTV4	215	TMEM43	TMM43_HUMAN Transmembrane protein 43 OS=Homo sapiens OX=9606 GN=TMEM43 PE=1 SV=1	2.12	0.77			NA|NA||	1.445	0.95459	66.0616
Q15233	330	NONO	NONO_HUMAN Non-POU domain-containing octamer-binding protein OS=Homo sapiens OX=9606 GN=NONO PE=1 SV=4		2.2	0.82	1.31	|0.97618|NA|NA	1.44333	0.6996	48.4712
Q9H6Z4	506	RANBP3	RANB3_HUMAN Ran-binding protein 3 OS=Homo sapiens OX=9606 GN=RANBP3 PE=1 SV=1	1.44				NA|||	1.44	NA	#VALUE!
Q9Y3B3	167	TMED7	TMED7_HUMAN Transmembrane emp24 domain-containing protein 7 OS=Homo sapiens OX=9606 GN=TMED7 PE=1 SV=2	1.8			1.08	NA|||0.0	1.44	0.50912	35.3556
P04844	528	RPN2	RPN2_HUMAN Dolichyl-diphosphooligosaccharide--protein glycosyltransferase subunit 2 OS=Homo sapiens OX=9606 GN=RPN2 PE=1 SV=3		1.44			|NA||	1.44	NA	#VALUE!
Q9UKV3	1118	ACIN1	ACINU_HUMAN Apoptotic chromatin condensation inducer in the nucleus OS=Homo sapiens OX=9606 GN=ACIN1 PE=1 SV=2			1.44		||NA|	1.44	NA	#VALUE!
Q9BZZ5	24	API5	API5_HUMAN Apoptosis inhibitor 5 OS=Homo sapiens OX=9606 GN=API5 PE=1 SV=3			1.52	1.36	||0.26558|0.33069	1.44	0.11314	7.85694
P35573	1488	AGL	GDE_HUMAN Glycogen debranching enzyme OS=Homo sapiens OX=9606 GN=AGL PE=1 SV=3				1.44	|||NA	1.44	NA	#VALUE!
Q9Y617	125	PSAT1	SERC_HUMAN Phosphoserine aminotransferase OS=Homo sapiens OX=9606 GN=PSAT1 PE=1 SV=2				1.44	|||0.50912	1.44	NA	#VALUE!
P78344	229	EIF4G2	IF4G2_HUMAN Eukaryotic translation initiation factor 4 gamma 2 OS=Homo sapiens OX=9606 GN=EIF4G2 PE=1 SV=1				1.44	|||NA	1.44	NA	#VALUE!
P54886	517	ALDH18A1	P5CS_HUMAN Delta-1-pyrroline-5-carboxylate synthase OS=Homo sapiens OX=9606 GN=ALDH18A1 PE=1 SV=2				1.44	|||0.3677	1.44	NA	#VALUE!
P39023	42	RPL3	RL3_HUMAN 60S ribosomal protein L3 OS=Homo sapiens OX=9606 GN=RPL3 PE=1 SV=2				1.44	|||NA	1.44	NA	#VALUE!
P41252	58	IARS1	SYIC_HUMAN Isoleucine--tRNA ligase, cytoplasmic OS=Homo sapiens OX=9606 GN=IARS1 PE=1 SV=2				1.44	|||NA	1.44	NA	#VALUE!
P07814	1093	EPRS1	SYEP_HUMAN Bifunctional glutamate/proline--tRNA ligase OS=Homo sapiens OX=9606 GN=EPRS1 PE=1 SV=5	1.33	1.54	0.96	1.92	0.16971|NA|NA|NA	1.4375	0.4012	27.9096
O43660	79	PLRG1	PLRG1_HUMAN Pleiotropic regulator 1 OS=Homo sapiens OX=9606 GN=PLRG1 PE=1 SV=1		1.44	1.43		|NA|NA|	1.435	0.00707	0.492683
P09874	544	PARP1	PARP1_HUMAN Poly [ADP-ribose] polymerase 1 OS=Homo sapiens OX=9606 GN=PARP1 PE=1 SV=4		1.435			|0.10607||	1.435	NA	#VALUE!
P49419	373	ALDH7A1	AL7A1_HUMAN Alpha-aminoadipic semialdehyde dehydrogenase OS=Homo sapiens OX=9606 GN=ALDH7A1 PE=1 SV=5				1.435	|||0.47376	1.435	NA	#VALUE!
P52209	472	PGD	6PGD_HUMAN 6-phosphogluconate dehydrogenase, decarboxylating OS=Homo sapiens OX=9606 GN=PGD PE=1 SV=3	1.915	1.12	1.3	1.4	1.23744|NA|NA|NA	1.43375	0.34111	23.7915
P04406	291	GAPDH	G3P_HUMAN Glyceraldehyde-3-phosphate dehydrogenase OS=Homo sapiens OX=9606 GN=GAPDH PE=1 SV=3	1.25	1.225	1.21	2.045	0.49497|1.08187|0.94752|0.37477	1.4325	0.40867	28.5284
P30153	479	PPP2R1A	2AAA_HUMAN Serine/threonine-protein phosphatase 2A 65 kDa regulatory subunit A alpha isoform OS=Homo sapiens OX=9606 GN=PPP2R1A PE=1 SV=4			1.875	0.99	||0.00707|NA	1.4325	0.62579	43.6852
Q9BZX2	117	UCK2	UCK2_HUMAN Uridine-cytidine kinase 2 OS=Homo sapiens OX=9606 GN=UCK2 PE=1 SV=1			1.01	1.855	||NA|0.07778	1.4325	0.59751	41.711
Q96F45	538	ZNF503	ZN503_HUMAN Zinc finger protein 503 OS=Homo sapiens OX=9606 GN=ZNF503 PE=1 SV=1		1.205	1.755	1.335	|0.30406|0.70004|0.34648	1.43167	0.28746	20.0786
Q8NAF0	66	ZNF579	ZN579_HUMAN Zinc finger protein 579 OS=Homo sapiens OX=9606 GN=ZNF579 PE=1 SV=2	1.43				0.6364|||	1.43	NA	#VALUE!
Q92499	601	DDX1	DDX1_HUMAN ATP-dependent RNA helicase DDX1 OS=Homo sapiens OX=9606 GN=DDX1 PE=1 SV=2		1.43			|NA||	1.43	NA	#VALUE!
Q12931	506	TRAP1	TRAP1_HUMAN Heat shock protein 75 kDa, mitochondrial OS=Homo sapiens OX=9606 GN=TRAP1 PE=1 SV=3		1.43			|NA||	1.43	NA	#VALUE!
Q9NTI5	705	PDS5B	PDS5B_HUMAN Sister chromatid cohesion protein PDS5 homolog B OS=Homo sapiens OX=9606 GN=PDS5B PE=1 SV=1		1.43			|NA||	1.43	NA	#VALUE!
Q9NW13	369	RBM28	RBM28_HUMAN RNA-binding protein 28 OS=Homo sapiens OX=9606 GN=RBM28 PE=1 SV=3			1.43		||NA|	1.43	NA	#VALUE!
P42677	9	RPS27	RS27_HUMAN 40S ribosomal protein S27 OS=Homo sapiens OX=9606 GN=RPS27 PE=1 SV=3			1.43		||0.31113|	1.43	NA	#VALUE!
Q9BY77	313	POLDIP3	PDIP3_HUMAN Polymerase delta-interacting protein 3 OS=Homo sapiens OX=9606 GN=POLDIP3 PE=1 SV=2			1.24	1.62	||NA|0.01414	1.43	0.2687	18.7902
O43390	380	HNRNPR	HNRPR_HUMAN Heterogeneous nuclear ribonucleoprotein R OS=Homo sapiens OX=9606 GN=HNRNPR PE=1 SV=1			1.43		||NA|	1.43	NA	#VALUE!
P53365	73	ARFIP2	ARFP2_HUMAN Arfaptin-2 OS=Homo sapiens OX=9606 GN=ARFIP2 PE=1 SV=1				1.43	|||NA	1.43	NA	#VALUE!
Q06210	595	GFPT1	GFPT1_HUMAN Glutamine--fructose-6-phosphate aminotransferase [isomerizing] 1 OS=Homo sapiens OX=9606 GN=GFPT1 PE=1 SV=3				1.43	|||NA	1.43	NA	#VALUE!
P08708	56	RPS17	RS17_HUMAN 40S ribosomal protein S17 OS=Homo sapiens OX=9606 GN=RPS17 PE=1 SV=2	2.1	0.99	0.71	1.905	NA|0.08485|NA|0.64347	1.42625	0.67982	47.6649
O76094	446	SRP72	SRP72_HUMAN Signal recognition particle subunit SRP72 OS=Homo sapiens OX=9606 GN=SRP72 PE=1 SV=3		1.24		1.61	|NA||0.18385	1.425	0.26163	18.36
P61247	232	RPS3A	RS3A_HUMAN 40S ribosomal protein S3a OS=Homo sapiens OX=9606 GN=RPS3A PE=1 SV=2			1.295	1.55	||0.36062|0.0	1.4225	0.18031	12.6756
P78344	307	EIF4G2	IF4G2_HUMAN Eukaryotic translation initiation factor 4 gamma 2 OS=Homo sapiens OX=9606 GN=EIF4G2 PE=1 SV=1	1.43	1.18	1.455	1.62	NA|0.59467|0.89803|0.62131	1.42125	0.18158	12.7761
Q14566	782	MCM6	MCM6_HUMAN DNA replication licensing factor MCM6 OS=Homo sapiens OX=9606 GN=MCM6 PE=1 SV=1	1.85	1.1	1.775	0.96	NA|0.86431|0.71418|NA	1.42125	0.45641	32.1133
Q7Z5L9	448	IRF2BP2	I2BP2_HUMAN Interferon regulatory factor 2-binding protein 2 OS=Homo sapiens OX=9606 GN=IRF2BP2 PE=1 SV=2		1.42			|NA||	1.42	NA	#VALUE!
Q8WUA2	380	PPIL4	PPIL4_HUMAN Peptidyl-prolyl cis-trans isomerase-like 4 OS=Homo sapiens OX=9606 GN=PPIL4 PE=1 SV=1			1.36	1.48	||NA|NA	1.42	0.08485	5.97535
P78527	693	PRKDC	PRKDC_HUMAN DNA-dependent protein kinase catalytic subunit OS=Homo sapiens OX=9606 GN=PRKDC PE=1 SV=3			1.42		||NA|	1.42	NA	#VALUE!
P62244	56	RPS15A	RS15A_HUMAN 40S ribosomal protein S15a OS=Homo sapiens OX=9606 GN=RPS15A PE=1 SV=2			1.27	1.57	||NA|0.0	1.42	0.21213	14.9387
O60678	252	PRMT3	ANM3_HUMAN Protein arginine N-methyltransferase 3 OS=Homo sapiens OX=9606 GN=PRMT3 PE=1 SV=4				1.42	|||NA	1.42	NA	#VALUE!
O15160	108	POLR1C	RPAC1_HUMAN DNA-directed RNA polymerases I and III subunit RPAC1 OS=Homo sapiens OX=9606 GN=POLR1C PE=1 SV=1				1.42	|||NA	1.42	NA	#VALUE!
P07954	235	FH	FUMH_HUMAN Fumarate hydratase, mitochondrial OS=Homo sapiens OX=9606 GN=FH PE=1 SV=3		1.71		1.12	|NA||NA	1.415	0.41719	29.4834
Q14152	175	EIF3A	EIF3A_HUMAN Eukaryotic translation initiation factor 3 subunit A OS=Homo sapiens OX=9606 GN=EIF3A PE=1 SV=1	2.325		0.73	1.18	0.34648||NA|NA	1.41167	0.82235	58.2537
Q9NYF8	294	BCLAF1	BCLF1_HUMAN Bcl-2-associated transcription factor 1 OS=Homo sapiens OX=9606 GN=BCLAF1 PE=1 SV=2	0.3		1.98	1.94	NA||NA|1.20208	1.40667	0.95861	68.1475
Q8IY81	797	FTSJ3	SPB1_HUMAN pre-rRNA 2'-O-ribose RNA methyltransferase FTSJ3 OS=Homo sapiens OX=9606 GN=FTSJ3 PE=1 SV=2	1.39			1.42	NA|||NA	1.405	0.02121	1.50961
Q9BQ67	260	GRWD1	GRWD1_HUMAN Glutamate-rich WD repeat-containing protein 1 OS=Homo sapiens OX=9606 GN=GRWD1 PE=1 SV=1			1.4		||NA|	1.4	NA	#VALUE!
O75694	952	NUP155	NU155_HUMAN Nuclear pore complex protein Nup155 OS=Homo sapiens OX=9606 GN=NUP155 PE=1 SV=1			1.78	1.02	||NA|0.02309	1.4	0.5374	38.3857
Q96IJ6	135	GMPPA	GMPPA_HUMAN Mannose-1-phosphate guanyltransferase alpha OS=Homo sapiens OX=9606 GN=GMPPA PE=1 SV=1			1.4		||NA|	1.4	NA	#VALUE!
Q14697	562	GANAB	GANAB_HUMAN Neutral alpha-glucosidase AB OS=Homo sapiens OX=9606 GN=GANAB PE=1 SV=3				1.4	|||0.12728	1.4	NA	#VALUE!
Q14204	2263	DYNC1H1	DYHC1_HUMAN Cytoplasmic dynein 1 heavy chain 1 OS=Homo sapiens OX=9606 GN=DYNC1H1 PE=1 SV=5				1.4	|||NA	1.4	NA	#VALUE!
Q9UHJ6	377	SHPK	SHPK_HUMAN Sedoheptulokinase OS=Homo sapiens OX=9606 GN=SHPK PE=1 SV=3				1.4	|||NA	1.4	NA	#VALUE!
P49736	488	MCM2	MCM2_HUMAN DNA replication licensing factor MCM2 OS=Homo sapiens OX=9606 GN=MCM2 PE=1 SV=4				1.4	|||NA	1.4	NA	#VALUE!
P42704	440	LRPPRC	LPPRC_HUMAN Leucine-rich PPR motif-containing protein, mitochondrial OS=Homo sapiens OX=9606 GN=LRPPRC PE=1 SV=3	1.52	0.67	2		NA|NA|0.17926|	1.39667	0.67352	48.2233
Q14684	407	RRP1B	RRP1B_HUMAN Ribosomal RNA processing protein 1 homolog B OS=Homo sapiens OX=9606 GN=RRP1B PE=1 SV=3			0.89	1.9	||NA|NA	1.395	0.71418	51.1957
P42704	643	LRPPRC	LPPRC_HUMAN Leucine-rich PPR motif-containing protein, mitochondrial OS=Homo sapiens OX=9606 GN=LRPPRC PE=1 SV=3			1.19	1.6	||NA|0.13204	1.395	0.28991	20.7821
Q7Z6Z7	2677	HUWE1	HUWE1_HUMAN E3 ubiquitin-protein ligase HUWE1 OS=Homo sapiens OX=9606 GN=HUWE1 PE=1 SV=3	1.39				NA|||	1.39	NA	#VALUE!
Q9Y490	1963	TLN1	TLN1_HUMAN Talin-1 OS=Homo sapiens OX=9606 GN=TLN1 PE=1 SV=3		1.39			|NA||	1.39	NA	#VALUE!
Q8NI51	336	CTCFL	CTCFL_HUMAN Transcriptional repressor CTCFL OS=Homo sapiens OX=9606 GN=CTCFL PE=1 SV=2			1.39		||NA|	1.39	NA	#VALUE!
Q13200	156	PSMD2	PSMD2_HUMAN 26S proteasome non-ATPase regulatory subunit 2 OS=Homo sapiens OX=9606 GN=PSMD2 PE=1 SV=3			1.39		||0.21213|	1.39	NA	#VALUE!
P35613	371	BSG	BASI_HUMAN Basigin OS=Homo sapiens OX=9606 GN=BSG PE=1 SV=2				1.39	|||NA	1.39	NA	#VALUE!
Q969V3	391	NCLN	NCLN_HUMAN Nicalin OS=Homo sapiens OX=9606 GN=NCLN PE=1 SV=2				1.39	|||NA	1.39	NA	#VALUE!
P49736	212	MCM2	MCM2_HUMAN DNA replication licensing factor MCM2 OS=Homo sapiens OX=9606 GN=MCM2 PE=1 SV=4		2.015	1.43	0.72	|1.6617|NA|0.41569	1.38833	0.6485	46.7108
Q15366	21	PCBP2	PCBP2_HUMAN Poly(rC)-binding protein 2 OS=Homo sapiens OX=9606 GN=PCBP2 PE=1 SV=1	1.36	1.54	1.08	1.55	0.35355|NA|NA|NA	1.3825	0.21975	15.8951
Q15365	21	PCBP1	PCBP1_HUMAN Poly(rC)-binding protein 1 OS=Homo sapiens OX=9606 GN=PCBP1 PE=1 SV=2	1.36	1.54	1.08	1.55	0.35355|NA|NA|NA	1.3825	0.21975	15.8951
Q15717	212	ELAVL1	ELAV1_HUMAN ELAV-like protein 1 OS=Homo sapiens OX=9606 GN=ELAVL1 PE=1 SV=2			0.93	1.835	||NA|0.28991	1.3825	0.63993	46.2879
P50454	315	SERPINH1	SERPH_HUMAN Serpin H1 OS=Homo sapiens OX=9606 GN=SERPINH1 PE=1 SV=2	1.42		0.74	1.98	NA||NA|NA	1.38	0.62097	44.9978
Q9H993	360	ARMT1	ARMT1_HUMAN Damage-control phosphatase ARMT1 OS=Homo sapiens OX=9606 GN=ARMT1 PE=1 SV=1	1.03			1.73	NA|||NA	1.38	0.49497	35.8674
Q14697	180	GANAB	GANAB_HUMAN Neutral alpha-glucosidase AB OS=Homo sapiens OX=9606 GN=GANAB PE=1 SV=3		1.38			|NA||	1.38	NA	#VALUE!
Q9BT78	307	COPS4	CSN4_HUMAN COP9 signalosome complex subunit 4 OS=Homo sapiens OX=9606 GN=COPS4 PE=1 SV=1			1.38		||NA|	1.38	NA	#VALUE!
O43707	781	ACTN4	ACTN4_HUMAN Alpha-actinin-4 OS=Homo sapiens OX=9606 GN=ACTN4 PE=1 SV=2			1.365	1.395	||0.17678|0.09192	1.38	0.02121	1.53696
P38606	47	ATP6V1A	VATA_HUMAN V-type proton ATPase catalytic subunit A OS=Homo sapiens OX=9606 GN=ATP6V1A PE=1 SV=2			1.38		||NA|	1.38	NA	#VALUE!
Q8N1G4	378	LRRC47	LRC47_HUMAN Leucine-rich repeat-containing protein 47 OS=Homo sapiens OX=9606 GN=LRRC47 PE=1 SV=1				1.38	|||NA	1.38	NA	#VALUE!
Q96P70	848	IPO9	IPO9_HUMAN Importin-9 OS=Homo sapiens OX=9606 GN=IPO9 PE=1 SV=3				1.38	|||0.0	1.38	NA	#VALUE!
Q9H000	347	MKRN2	MKRN2_HUMAN Probable E3 ubiquitin-protein ligase makorin-2 OS=Homo sapiens OX=9606 GN=MKRN2 PE=1 SV=2	1.6	1.15			NA|NA||	1.375	0.3182	23.1418
P25705	514	ATP5F1A	ATPA_HUMAN ATP synthase subunit alpha, mitochondrial OS=Homo sapiens OX=9606 GN=ATP5F1A PE=1 SV=1			1.28	1.47	||0.59214|NA	1.375	0.13435	9.77091
Q9H4M9	39	EHD1	EHD1_HUMAN EH domain-containing protein 1 OS=Homo sapiens OX=9606 GN=EHD1 PE=1 SV=2	1.75	1.28	1.08		NA|NA|NA|	1.37	0.34395	25.1058
O15269	395	SPTLC1	SPTC1_HUMAN Serine palmitoyltransferase 1 OS=Homo sapiens OX=9606 GN=SPTLC1 PE=1 SV=1	1.37				NA|||	1.37	NA	#VALUE!
Q8N1F7	343	NUP93	NUP93_HUMAN Nuclear pore complex protein Nup93 OS=Homo sapiens OX=9606 GN=NUP93 PE=1 SV=2		1.44		1.3	|NA||0.05657	1.37	0.09899	7.22555
P30085	31	CMPK1	KCY_HUMAN UMP-CMP kinase OS=Homo sapiens OX=9606 GN=CMPK1 PE=1 SV=3		1.37			|NA||	1.37	NA	#VALUE!
Q9HD45	219	TM9SF3	TM9S3_HUMAN Transmembrane 9 superfamily member 3 OS=Homo sapiens OX=9606 GN=TM9SF3 PE=1 SV=2		1.68	1.06		|NA|NA|	1.37	0.43841	32.0007
Q96P70	428	IPO9	IPO9_HUMAN Importin-9 OS=Homo sapiens OX=9606 GN=IPO9 PE=1 SV=3			1.09	1.65	||0.24194|NA	1.37	0.39598	28.9036
P26640	566	VARS1	SYVC_HUMAN Valine--tRNA ligase OS=Homo sapiens OX=9606 GN=VARS1 PE=1 SV=4				1.37	|||NA	1.37	NA	#VALUE!
O94776	233	MTA2	MTA2_HUMAN Metastasis-associated protein MTA2 OS=Homo sapiens OX=9606 GN=MTA2 PE=1 SV=1				1.37	|||NA	1.37	NA	#VALUE!
O43175	532	PHGDH	SERA_HUMAN D-3-phosphoglycerate dehydrogenase OS=Homo sapiens OX=9606 GN=PHGDH PE=1 SV=4	0.97	1.075	1.88	1.54	0.60694|0.40305|0.28096|0.62326	1.36625	0.42268	30.9372
O14818	15	PSMA7	PSA7_HUMAN Proteasome subunit alpha type-7 OS=Homo sapiens OX=9606 GN=PSMA7 PE=1 SV=1	1.36				NA|||	1.36	NA	#VALUE!
Q06323	164	PSME1	PSME1_HUMAN Proteasome activator complex subunit 1 OS=Homo sapiens OX=9606 GN=PSME1 PE=1 SV=1			1.36		||NA|	1.36	NA	#VALUE!
P35580	294	MYH10	MYH10_HUMAN Myosin-10 OS=Homo sapiens OX=9606 GN=MYH10 PE=1 SV=3				1.36	|||NA	1.36	NA	#VALUE!
P78371	269	CCT2	TCPB_HUMAN T-complex protein 1 subunit beta OS=Homo sapiens OX=9606 GN=CCT2 PE=1 SV=4			1.255	1.445	||0.33234|0.36062	1.35	0.13435	9.95185
Q6P2Q9	2309	PRPF8	PRP8_HUMAN Pre-mRNA-processing-splicing factor 8 OS=Homo sapiens OX=9606 GN=PRPF8 PE=1 SV=2			1.35		||NA|	1.35	NA	#VALUE!
Q9NTK5	217	OLA1	OLA1_HUMAN Obg-like ATPase 1 OS=Homo sapiens OX=9606 GN=OLA1 PE=1 SV=2			1.35		||NA|	1.35	NA	#VALUE!
Q9UN37	312	VPS4A	VPS4A_HUMAN Vacuolar protein sorting-associated protein 4A OS=Homo sapiens OX=9606 GN=VPS4A PE=1 SV=1			0.87	1.83	||NA|NA	1.35	0.67882	50.283
Q15005	216	SPCS2	SPCS2_HUMAN Signal peptidase complex subunit 2 OS=Homo sapiens OX=9606 GN=SPCS2 PE=1 SV=3				1.35	|||NA	1.35	NA	#VALUE!
P49327	1735	FASN	FAS_HUMAN Fatty acid synthase OS=Homo sapiens OX=9606 GN=FASN PE=1 SV=3				1.35	|||0.0	1.35	NA	#VALUE!
Q9NR46	249	SH3GLB2	SHLB2_HUMAN Endophilin-B2 OS=Homo sapiens OX=9606 GN=SH3GLB2 PE=1 SV=1				1.35	|||NA	1.35	NA	#VALUE!
Q13310	626	PABPC4	PABP4_HUMAN Polyadenylate-binding protein 4 OS=Homo sapiens OX=9606 GN=PABPC4 PE=1 SV=1	1.41	1.48	1.13	1.365	NA|NA|NA|0.23335	1.34625	0.15173	11.2706
Q9GZT3	38	SLIRP	SLIRP_HUMAN SRA stem-loop-interacting RNA-binding protein, mitochondrial OS=Homo sapiens OX=9606 GN=SLIRP PE=1 SV=1	1.53	1.7	1.49	0.66	0.33292|NA|0.48515|NA	1.345	0.46565	34.6208
P49915	153	GMPS	GUAA_HUMAN GMP synthase [glutamine-hydrolyzing] OS=Homo sapiens OX=9606 GN=GMPS PE=1 SV=1			1.345		||0.60104|	1.345	NA	#VALUE!
Q9HD15	171	SRA1	SRA1_HUMAN Steroid receptor RNA activator 1 OS=Homo sapiens OX=9606 GN=SRA1 PE=1 SV=1	1.34				NA|||	1.34	NA	#VALUE!
Q9H7Z7	377	PTGES2	PGES2_HUMAN Prostaglandin E synthase 2 OS=Homo sapiens OX=9606 GN=PTGES2 PE=1 SV=1		1.34			|NA||	1.34	NA	#VALUE!
P18077	24	RPL35A	RL35A_HUMAN 60S ribosomal protein L35a OS=Homo sapiens OX=9606 GN=RPL35A PE=1 SV=2		1.34			|NA||	1.34	NA	#VALUE!
O15067	131	PFAS	PUR4_HUMAN Phosphoribosylformylglycinamidine synthase OS=Homo sapiens OX=9606 GN=PFAS PE=1 SV=4		1.34			|NA||	1.34	NA	#VALUE!
Q12905	117	ILF2	ILF2_HUMAN Interleukin enhancer-binding factor 2 OS=Homo sapiens OX=9606 GN=ILF2 PE=1 SV=2			1.34		||NA|	1.34	NA	#VALUE!
Q9Y237	123	PIN4	PIN4_HUMAN Peptidyl-prolyl cis-trans isomerase NIMA-interacting 4 OS=Homo sapiens OX=9606 GN=PIN4 PE=1 SV=1				1.34	|||0.08145	1.34	NA	#VALUE!
P39748	276	FEN1	FEN1_HUMAN Flap endonuclease 1 OS=Homo sapiens OX=9606 GN=FEN1 PE=1 SV=1		1.41	1.26		|NA|NA|	1.335	0.10607	7.94532
O15067	240	PFAS	PUR4_HUMAN Phosphoribosylformylglycinamidine synthase OS=Homo sapiens OX=9606 GN=PFAS PE=1 SV=4			1.335		||0.5842|	1.335	NA	#VALUE!
Q9NTJ3	198	SMC4	SMC4_HUMAN Structural maintenance of chromosomes protein 4 OS=Homo sapiens OX=9606 GN=SMC4 PE=1 SV=2	1.33				NA|||	1.33	NA	#VALUE!
Q9BRX5	110	GINS3	PSF3_HUMAN DNA replication complex GINS protein PSF3 OS=Homo sapiens OX=9606 GN=GINS3 PE=1 SV=1	1.33				NA|||	1.33	NA	#VALUE!
Q9UM00	181	TMCO1	TMCO1_HUMAN Calcium load-activated calcium channel OS=Homo sapiens OX=9606 GN=TMCO1 PE=1 SV=2	1.33				NA|||	1.33	NA	#VALUE!
P41252	55	IARS1	SYIC_HUMAN Isoleucine--tRNA ligase, cytoplasmic OS=Homo sapiens OX=9606 GN=IARS1 PE=1 SV=2			1.33		||NA|	1.33	NA	#VALUE!
Q96AC1	96	FERMT2	FERM2_HUMAN Fermitin family homolog 2 OS=Homo sapiens OX=9606 GN=FERMT2 PE=1 SV=1				1.33	|||NA	1.33	NA	#VALUE!
P25788	225	PSMA3	PSA3_HUMAN Proteasome subunit alpha type-3 OS=Homo sapiens OX=9606 GN=PSMA3 PE=1 SV=2				1.33	|||NA	1.33	NA	#VALUE!
Q9UM54	264	MYO6	MYO6_HUMAN Unconventional myosin-VI OS=Homo sapiens OX=9606 GN=MYO6 PE=1 SV=4				1.33	|||NA	1.33	NA	#VALUE!
Q6P2E9	1202	EDC4	EDC4_HUMAN Enhancer of mRNA-decapping protein 4 OS=Homo sapiens OX=9606 GN=EDC4 PE=1 SV=1		1.27		1.38	|NA||NA	1.325	0.07778	5.87019
P50851	2405	LRBA	LRBA_HUMAN Lipopolysaccharide-responsive and beige-like anchor protein OS=Homo sapiens OX=9606 GN=LRBA PE=1 SV=4	1.32				NA|||	1.32	NA	#VALUE!
Q6IBS0	313	TWF2	TWF2_HUMAN Twinfilin-2 OS=Homo sapiens OX=9606 GN=TWF2 PE=1 SV=2			1.32		||NA|	1.32	NA	#VALUE!
P41252	854	IARS1	SYIC_HUMAN Isoleucine--tRNA ligase, cytoplasmic OS=Homo sapiens OX=9606 GN=IARS1 PE=1 SV=2			1.32		||0.20817|	1.32	NA	#VALUE!
Q8NBF2	497	NHLRC2	NHLC2_HUMAN NHL repeat-containing protein 2 OS=Homo sapiens OX=9606 GN=NHLRC2 PE=1 SV=1			1.32		||NA|	1.32	NA	#VALUE!
P48634	229	PRRC2A	PRC2A_HUMAN Protein PRRC2A OS=Homo sapiens OX=9606 GN=PRRC2A PE=1 SV=3				1.32	|||NA	1.32	NA	#VALUE!
Q8IWS0	239	PHF6	PHF6_HUMAN PHD finger protein 6 OS=Homo sapiens OX=9606 GN=PHF6 PE=1 SV=1				1.32	|||NA	1.32	NA	#VALUE!
P21108	304	PRPS1L1	PRPS3_HUMAN Ribose-phosphate pyrophosphokinase 3 OS=Homo sapiens OX=9606 GN=PRPS1L1 PE=1 SV=2		0.98	1.65		|NA|NA|	1.315	0.47376	36.0274
P11908	304	PRPS2	PRPS2_HUMAN Ribose-phosphate pyrophosphokinase 2 OS=Homo sapiens OX=9606 GN=PRPS2 PE=1 SV=2		0.98	1.65		|NA|NA|	1.315	0.47376	36.0274
Q92973	87	TNPO1	TNPO1_HUMAN Transportin-1 OS=Homo sapiens OX=9606 GN=TNPO1 PE=1 SV=2	1.42	1.28		1.24	NA|NA||NA	1.31333	0.09452	7.19697
P04350	37	TUBB4A	TBB4A_HUMAN Tubulin beta-4A chain OS=Homo sapiens OX=9606 GN=TUBB4A PE=1 SV=2			1.5	1.125	||0.31|0.42481	1.3125	0.26517	20.2034
P68371	37	TUBB4B	TBB4B_HUMAN Tubulin beta-4B chain OS=Homo sapiens OX=9606 GN=TUBB4B PE=1 SV=1			1.5	1.125	||0.31|0.42481	1.3125	0.26517	20.2034
O60271	193	SPAG9	JIP4_HUMAN C-Jun-amino-terminal kinase-interacting protein 4 OS=Homo sapiens OX=9606 GN=SPAG9 PE=1 SV=4		1.31			|NA||	1.31	NA	#VALUE!
Q96T88	14	UHRF1	UHRF1_HUMAN E3 ubiquitin-protein ligase UHRF1 OS=Homo sapiens OX=9606 GN=UHRF1 PE=1 SV=1			1.31		||NA|	1.31	NA	#VALUE!
P31930	95	UQCRC1	QCR1_HUMAN Cytochrome b-c1 complex subunit 1, mitochondrial OS=Homo sapiens OX=9606 GN=UQCRC1 PE=1 SV=3			1.31		||NA|	1.31	NA	#VALUE!
Q9UNX3	18	RPL26L1	RL26L_HUMAN 60S ribosomal protein L26-like 1 OS=Homo sapiens OX=9606 GN=RPL26L1 PE=1 SV=1	1.34			1.27	NA|||0.16971	1.305	0.0495	3.7931
P49368	302	CCT3	TCPG_HUMAN T-complex protein 1 subunit gamma OS=Homo sapiens OX=9606 GN=CCT3 PE=1 SV=4	0.88	1.73			0.09899|NA||	1.305	0.60104	46.0567
P26640	596	VARS1	SYVC_HUMAN Valine--tRNA ligase OS=Homo sapiens OX=9606 GN=VARS1 PE=1 SV=4			0.81	1.8	||0.0|NA	1.305	0.70004	53.6429
P13073	44	COX4I1	COX41_HUMAN Cytochrome c oxidase subunit 4 isoform 1, mitochondrial OS=Homo sapiens OX=9606 GN=COX4I1 PE=1 SV=1	1.785	1.12	1.31	1	0.3667|0.2616|0.5374|0.27049	1.30375	0.34529	26.4844
P14868	444	DARS1	SYDC_HUMAN Aspartate--tRNA ligase, cytoplasmic OS=Homo sapiens OX=9606 GN=DARS1 PE=1 SV=2	1.39	1.59		0.93	NA|NA||0.0	1.30333	0.33843	25.9666
P40429	72	RPL13A	RL13A_HUMAN 60S ribosomal protein L13a OS=Homo sapiens OX=9606 GN=RPL13A PE=1 SV=2	0.77			1.83	NA|||NA	1.3	0.74953	57.6562
Q96C36	28	PYCR2	P5CR2_HUMAN Pyrroline-5-carboxylate reductase 2 OS=Homo sapiens OX=9606 GN=PYCR2 PE=1 SV=1	0.62			1.98	NA|||NA	1.3	0.96167	73.9746
P31948	101	STIP1	STIP1_HUMAN Stress-induced-phosphoprotein 1 OS=Homo sapiens OX=9606 GN=STIP1 PE=1 SV=1		0.94	0.87	2.09	|NA|NA|NA	1.3	0.68505	52.6962
P43897	83	TSFM	EFTS_HUMAN Elongation factor Ts, mitochondrial OS=Homo sapiens OX=9606 GN=TSFM PE=1 SV=2		1.3			|NA||	1.3	NA	#VALUE!
P53396	136	ACLY	ACLY_HUMAN ATP-citrate synthase OS=Homo sapiens OX=9606 GN=ACLY PE=1 SV=3			1.525	1.075	||0.74246|0.00707	1.3	0.3182	24.4769
P23381	336	WARS1	SYWC_HUMAN Tryptophan--tRNA ligase, cytoplasmic OS=Homo sapiens OX=9606 GN=WARS1 PE=1 SV=2			1.3		||NA|	1.3	NA	#VALUE!
P23526	398	AHCY	SAHH_HUMAN Adenosylhomocysteinase OS=Homo sapiens OX=9606 GN=AHCY PE=1 SV=4				1.3	|||0.51152	1.3	NA	#VALUE!
Q08945	224	SSRP1	SSRP1_HUMAN FACT complex subunit SSRP1 OS=Homo sapiens OX=9606 GN=SSRP1 PE=1 SV=1				1.3	|||NA	1.3	NA	#VALUE!
Q9Y676	166	MRPS18B	RT18B_HUMAN 28S ribosomal protein S18b, mitochondrial OS=Homo sapiens OX=9606 GN=MRPS18B PE=1 SV=1			1.09	1.505	||NA|0.67175	1.2975	0.29345	22.6166
O95881	62	TXNDC12	TXD12_HUMAN Thioredoxin domain-containing protein 12 OS=Homo sapiens OX=9606 GN=TXNDC12 PE=1 SV=1			1.06	1.53	||NA|NA	1.295	0.33234	25.6633
Q13151	161	HNRNPA0	ROA0_HUMAN Heterogeneous nuclear ribonucleoprotein A0 OS=Homo sapiens OX=9606 GN=HNRNPA0 PE=1 SV=1		1.26	1.57	1.05	|NA|0.66468|0.73759	1.29333	0.2616	20.2269
Q12789	780	GTF3C1	TF3C1_HUMAN General transcription factor 3C polypeptide 1 OS=Homo sapiens OX=9606 GN=GTF3C1 PE=1 SV=4	1.29				NA|||	1.29	NA	#VALUE!
Q00610	629	CLTC	CLH1_HUMAN Clathrin heavy chain 1 OS=Homo sapiens OX=9606 GN=CLTC PE=1 SV=5	1.6	1.27	1.27	1.02	0.72125|0.0|0.14821|0.15758	1.29	0.23791	18.4426
Q13618	530	CUL3	CUL3_HUMAN Cullin-3 OS=Homo sapiens OX=9606 GN=CUL3 PE=1 SV=2	1.29				NA|||	1.29	NA	#VALUE!
Q96EE3	16	SEH1L	SEH1_HUMAN Nucleoporin SEH1 OS=Homo sapiens OX=9606 GN=SEH1L PE=1 SV=3	1.29				NA|||	1.29	NA	#VALUE!
Q86WZ6	346	ZNF227	ZN227_HUMAN Zinc finger protein 227 OS=Homo sapiens OX=9606 GN=ZNF227 PE=1 SV=1		1.29			|NA||	1.29	NA	#VALUE!
A6NNF4	251	ZNF726	ZN726_HUMAN Zinc finger protein 726 OS=Homo sapiens OX=9606 GN=ZNF726 PE=1 SV=4		1.29			|NA||	1.29	NA	#VALUE!
Q8N782	95	ZNF525	ZN525_HUMAN Zinc finger protein 525 OS=Homo sapiens OX=9606 GN=ZNF525 PE=2 SV=2		1.29			|NA||	1.29	NA	#VALUE!
Q9NPA8	61	ENY2	ENY2_HUMAN Transcription and mRNA export factor ENY2 OS=Homo sapiens OX=9606 GN=ENY2 PE=1 SV=1		1.76	0.82		|NA|NA|	1.29	0.66468	51.5256
Q9BZX2	85	UCK2	UCK2_HUMAN Uridine-cytidine kinase 2 OS=Homo sapiens OX=9606 GN=UCK2 PE=1 SV=1			1.29		||NA|	1.29	NA	#VALUE!
Q9UEW8	184	STK39	STK39_HUMAN STE20/SPS1-related proline-alanine-rich protein kinase OS=Homo sapiens OX=9606 GN=STK39 PE=1 SV=3				1.29	|||NA	1.29	NA	#VALUE!
P11766	348	ADH5	ADHX_HUMAN Alcohol dehydrogenase class-3 OS=Homo sapiens OX=9606 GN=ADH5 PE=1 SV=4				1.29	|||0.15556	1.29	NA	#VALUE!
Q04206	181	RELA	TF65_HUMAN Transcription factor p65 OS=Homo sapiens OX=9606 GN=RELA PE=1 SV=2				1.29	|||0.0	1.29	NA	#VALUE!
P10644	25	PRKAR1A	KAP0_HUMAN cAMP-dependent protein kinase type I-alpha regulatory subunit OS=Homo sapiens OX=9606 GN=PRKAR1A PE=1 SV=1	0.89		1.62	1.35	NA||0.0|NA	1.28667	0.3691	28.6865
Q92499	442	DDX1	DDX1_HUMAN ATP-dependent RNA helicase DDX1 OS=Homo sapiens OX=9606 GN=DDX1 PE=1 SV=2		1.86	0.89	1.11	|NA|NA|NA	1.28667	0.50856	39.5253
P23919	66	DTYMK	KTHY_HUMAN Thymidylate kinase OS=Homo sapiens OX=9606 GN=DTYMK PE=1 SV=4		1.73	0.68	1.44	|NA|NA|NA	1.28333	0.54225	42.2534
Q14980	581	NUMA1	NUMA1_HUMAN Nuclear mitotic apparatus protein 1 OS=Homo sapiens OX=9606 GN=NUMA1 PE=1 SV=2	1.32			1.245	NA|||0.09899	1.2825	0.05303	4.13489
P54577	305	YARS1	SYYC_HUMAN Tyrosine--tRNA ligase, cytoplasmic OS=Homo sapiens OX=9606 GN=YARS1 PE=1 SV=4	1.97	0.85	0.86	1.45	NA|NA|NA|0.32924	1.2825	0.53736	41.8994
Q6P4A7	334	SFXN4	SFXN4_HUMAN Sideroflexin-4 OS=Homo sapiens OX=9606 GN=SFXN4 PE=1 SV=1		1.28			|NA||	1.28	NA	#VALUE!
O75477	268	ERLIN1	ERLN1_HUMAN Erlin-1 OS=Homo sapiens OX=9606 GN=ERLIN1 PE=1 SV=2			1.28		||NA|	1.28	NA	#VALUE!
Q8TEM1	1563	NUP210	PO210_HUMAN Nuclear pore membrane glycoprotein 210 OS=Homo sapiens OX=9606 GN=NUP210 PE=1 SV=3			1.28		||NA|	1.28	NA	#VALUE!
Q5JTH9	412	RRP12	RRP12_HUMAN RRP12-like protein OS=Homo sapiens OX=9606 GN=RRP12 PE=1 SV=2			1.28		||NA|	1.28	NA	#VALUE!
A5YKK6	1797	CNOT1	CNOT1_HUMAN CCR4-NOT transcription complex subunit 1 OS=Homo sapiens OX=9606 GN=CNOT1 PE=1 SV=2				1.28	|||NA	1.28	NA	#VALUE!
P53396	1072	ACLY	ACLY_HUMAN ATP-citrate synthase OS=Homo sapiens OX=9606 GN=ACLY PE=1 SV=3				1.28	|||NA	1.28	NA	#VALUE!
P08243	184	ASNS	ASNS_HUMAN Asparagine synthetase [glutamine-hydrolyzing] OS=Homo sapiens OX=9606 GN=ASNS PE=1 SV=4				1.28	|||NA	1.28	NA	#VALUE!
P42166	467	TMPO	LAP2A_HUMAN Lamina-associated polypeptide 2, isoform alpha OS=Homo sapiens OX=9606 GN=TMPO PE=1 SV=2	1.27				NA|||	1.27	NA	#VALUE!
Q86XP3	853	DDX42	DDX42_HUMAN ATP-dependent RNA helicase DDX42 OS=Homo sapiens OX=9606 GN=DDX42 PE=1 SV=1			1.27		||NA|	1.27	NA	#VALUE!
P27708	2025	CAD	PYR1_HUMAN CAD protein OS=Homo sapiens OX=9606 GN=CAD PE=1 SV=3				1.27	|||NA	1.27	NA	#VALUE!
P04844	170	RPN2	RPN2_HUMAN Dolichyl-diphosphooligosaccharide--protein glycosyltransferase subunit 2 OS=Homo sapiens OX=9606 GN=RPN2 PE=1 SV=3				1.27	|||0.0	1.27	NA	#VALUE!
Q9UDW1	46	UQCR10	QCR9_HUMAN Cytochrome b-c1 complex subunit 9 OS=Homo sapiens OX=9606 GN=UQCR10 PE=1 SV=3	1.16		1.17	1.47	NA||NA|NA	1.26667	0.17616	13.9073
Q15813	415	TBCE	TBCE_HUMAN Tubulin-specific chaperone E OS=Homo sapiens OX=9606 GN=TBCE PE=1 SV=1		1.13		1.4	|NA||NA	1.265	0.19092	15.0925
Q9Y230	240	RUVBL2	RUVB2_HUMAN RuvB-like 2 OS=Homo sapiens OX=9606 GN=RUVBL2 PE=1 SV=3		1.26			|NA||	1.26	NA	#VALUE!
Q9NYF8	608	BCLAF1	BCLF1_HUMAN Bcl-2-associated transcription factor 1 OS=Homo sapiens OX=9606 GN=BCLAF1 PE=1 SV=2			1.26		||0.0|	1.26	NA	#VALUE!
Q96GX9	52	APIP	MTNB_HUMAN Methylthioribulose-1-phosphate dehydratase OS=Homo sapiens OX=9606 GN=APIP PE=1 SV=1				1.26	|||NA	1.26	NA	#VALUE!
P47897	604	QARS1	SYQ_HUMAN Glutamine--tRNA ligase OS=Homo sapiens OX=9606 GN=QARS1 PE=1 SV=1				1.26	|||0.87681	1.26	NA	#VALUE!
Q13162	75	PRDX4	PRDX4_HUMAN Peroxiredoxin-4 OS=Homo sapiens OX=9606 GN=PRDX4 PE=1 SV=1	0.78	1.09	1.44	1.72	NA|1.94343|0.0|0.55284	1.2575	0.40958	32.571
P25490	407	YY1	TYY1_HUMAN Transcriptional repressor protein YY1 OS=Homo sapiens OX=9606 GN=YY1 PE=1 SV=2		1.38	1.11	1.275	|0.0|NA|1.13844	1.255	0.13611	10.8454
Q01780	405	EXOSC10	EXOSX_HUMAN Exosome component 10 OS=Homo sapiens OX=9606 GN=EXOSC10 PE=1 SV=2			0.95	1.56	||0.04243|NA	1.255	0.43134	34.3697
O14980	52	XPO1	XPO1_HUMAN Exportin-1 OS=Homo sapiens OX=9606 GN=XPO1 PE=1 SV=1			1.01	1.5	||0.0|NA	1.255	0.34648	27.608
P41252	323	IARS1	SYIC_HUMAN Isoleucine--tRNA ligase, cytoplasmic OS=Homo sapiens OX=9606 GN=IARS1 PE=1 SV=2			1.01	1.5	||NA|NA	1.255	0.34648	27.608
O75439	233	PMPCB	MPPB_HUMAN Mitochondrial-processing peptidase subunit beta OS=Homo sapiens OX=9606 GN=PMPCB PE=1 SV=2	1.53	0.9	1.23	1.35	NA|NA|0.19799|0.75036	1.2525	0.26538	21.188
Q9ULK4	449	MED23	MED23_HUMAN Mediator of RNA polymerase II transcription subunit 23 OS=Homo sapiens OX=9606 GN=MED23 PE=1 SV=2	1.39		1.11		NA||NA|	1.25	0.19799	15.8392
P13797	304	PLS3	PLST_HUMAN Plastin-3 OS=Homo sapiens OX=9606 GN=PLS3 PE=1 SV=4	1.54		0.96		NA||NA|	1.25	0.41012	32.8096
P22695	227	UQCRC2	QCR2_HUMAN Cytochrome b-c1 complex subunit 2, mitochondrial OS=Homo sapiens OX=9606 GN=UQCRC2 PE=1 SV=3		1.25			|NA||	1.25	NA	#VALUE!
P14866	105	HNRNPL	HNRPL_HUMAN Heterogeneous nuclear ribonucleoprotein L OS=Homo sapiens OX=9606 GN=HNRNPL PE=1 SV=2			1.25		||NA|	1.25	NA	#VALUE!
P63167	68	DYNLL1	DYL1_HUMAN Dynein light chain 1, cytoplasmic OS=Homo sapiens OX=9606 GN=DYNLL1 PE=1 SV=1			1.25		||NA|	1.25	NA	#VALUE!
P63172	36	DYNLT1	DYLT1_HUMAN Dynein light chain Tctex-type 1 OS=Homo sapiens OX=9606 GN=DYNLT1 PE=1 SV=1				1.25	|||NA	1.25	NA	#VALUE!
P42166	612	TMPO	LAP2A_HUMAN Lamina-associated polypeptide 2, isoform alpha OS=Homo sapiens OX=9606 GN=TMPO PE=1 SV=2				1.25	|||NA	1.25	NA	#VALUE!
Q9BVA1	37	TUBB2B	TBB2B_HUMAN Tubulin beta-2B chain OS=Homo sapiens OX=9606 GN=TUBB2B PE=1 SV=1				1.25	|||NA	1.25	NA	#VALUE!
Q13885	37	TUBB2A	TBB2A_HUMAN Tubulin beta-2A chain OS=Homo sapiens OX=9606 GN=TUBB2A PE=1 SV=1				1.25	|||NA	1.25	NA	#VALUE!
P25786	59	PSMA1	PSA1_HUMAN Proteasome subunit alpha type-1 OS=Homo sapiens OX=9606 GN=PSMA1 PE=1 SV=1	0.72		1.33	1.685	NA||NA|0.54447	1.245	0.48808	39.2032
P31948	38	STIP1	STIP1_HUMAN Stress-induced-phosphoprotein 1 OS=Homo sapiens OX=9606 GN=STIP1 PE=1 SV=1	0.62		1.87		NA||NA|	1.245	0.88388	70.9944
P40227	65	CCT6A	TCPZ_HUMAN T-complex protein 1 subunit zeta OS=Homo sapiens OX=9606 GN=CCT6A PE=1 SV=3			1.22	1.27	||NA|NA	1.245	0.03536	2.84016
Q9UNZ2	175	NSFL1C	NSF1C_HUMAN NSFL1 cofactor p47 OS=Homo sapiens OX=9606 GN=NSFL1C PE=1 SV=2			1.015	1.47	||0.20506|NA	1.2425	0.32173	25.8938
P18124	226	RPL7	RL7_HUMAN 60S ribosomal protein L7 OS=Homo sapiens OX=9606 GN=RPL7 PE=1 SV=1		0.715	2.04	0.97	|0.14849|NA|0.21213	1.24167	0.70304	56.6205
Q9NTI5	612	PDS5B	PDS5B_HUMAN Sister chromatid cohesion protein PDS5 homolog B OS=Homo sapiens OX=9606 GN=PDS5B PE=1 SV=1	1.22		1.26		NA||0.0|	1.24	0.02828	2.28065
Q9Y277	183	VDAC3	VDAC3_HUMAN Voltage-dependent anion-selective channel protein 3 OS=Homo sapiens OX=9606 GN=VDAC3 PE=1 SV=1		1.235			|0.26163||	1.235	NA	#VALUE!
P31689	248	DNAJA1	DNJA1_HUMAN DnaJ homolog subfamily A member 1 OS=Homo sapiens OX=9606 GN=DNAJA1 PE=1 SV=2	1.605	1.32		0.77	0.23335|0.0||NA	1.23167	0.42445	34.4613
Q9UH99	269	SUN2	SUN2_HUMAN SUN domain-containing protein 2 OS=Homo sapiens OX=9606 GN=SUN2 PE=1 SV=3	1.23				NA|||	1.23	NA	#VALUE!
Q14181	419	POLA2	DPOA2_HUMAN DNA polymerase alpha subunit B OS=Homo sapiens OX=9606 GN=POLA2 PE=1 SV=2	1.29			1.17	0.02828|||NA	1.23	0.08485	6.89837
Q6PKG0	877	LARP1	LARP1_HUMAN La-related protein 1 OS=Homo sapiens OX=9606 GN=LARP1 PE=1 SV=2		0.46	2		|NA|NA|	1.23	1.08894	88.5317
Q99873	311	PRMT1	ANM1_HUMAN Protein arginine N-methyltransferase 1 OS=Homo sapiens OX=9606 GN=PRMT1 PE=1 SV=3		1.33	1.18	1.18	|NA|NA|0.0	1.23	0.0866	7.04065
O75792	223	RNASEH2A	RNH2A_HUMAN Ribonuclease H2 subunit A OS=Homo sapiens OX=9606 GN=RNASEH2A PE=1 SV=2		1.23			|NA||	1.23	NA	#VALUE!
Q9BV38	256	WDR18	WDR18_HUMAN WD repeat-containing protein 18 OS=Homo sapiens OX=9606 GN=WDR18 PE=1 SV=2			1.23		||NA|	1.23	NA	#VALUE!
O60664	253	PLIN3	PLIN3_HUMAN Perilipin-3 OS=Homo sapiens OX=9606 GN=PLIN3 PE=1 SV=3				1.23	|||NA	1.23	NA	#VALUE!
Q15149	435	PLEC	PLEC_HUMAN Plectin OS=Homo sapiens OX=9606 GN=PLEC PE=1 SV=3				1.23	|||NA	1.23	NA	#VALUE!
P56192	337	MARS1	SYMC_HUMAN Methionine--tRNA ligase, cytoplasmic OS=Homo sapiens OX=9606 GN=MARS1 PE=1 SV=2		0.99	1.23	1.46	|NA|NA|0.45255	1.22667	0.23502	19.1592
Q6UWP7	271	LCLAT1	LCLT1_HUMAN Lysocardiolipin acyltransferase 1 OS=Homo sapiens OX=9606 GN=LCLAT1 PE=1 SV=1	1.37			1.08	NA|||NA	1.225	0.20506	16.7396
Q7L2E3	505	DHX30	DHX30_HUMAN ATP-dependent RNA helicase DHX30 OS=Homo sapiens OX=9606 GN=DHX30 PE=1 SV=1		1.17		1.275	|NA||0.0495	1.2225	0.07425	6.07362
P63165	35	SUMO1	SUMO1_HUMAN Small ubiquitin-related modifier 1 OS=Homo sapiens OX=9606 GN=SUMO1 PE=1 SV=1		1.15	1.295		|NA|0.38891|	1.2225	0.10253	8.38691
Q7Z2W4	533	ZC3HAV1	ZCCHV_HUMAN Zinc finger CCCH-type antiviral protein 1 OS=Homo sapiens OX=9606 GN=ZC3HAV1 PE=1 SV=3	1.2		1.24		NA||NA|	1.22	0.02828	2.31803
P11216	414	PYGB	PYGB_HUMAN Glycogen phosphorylase, brain form OS=Homo sapiens OX=9606 GN=PYGB PE=1 SV=5		1.22			|NA||	1.22	NA	#VALUE!
P49792	3186	RANBP2	RBP2_HUMAN E3 SUMO-protein ligase RanBP2 OS=Homo sapiens OX=9606 GN=RANBP2 PE=1 SV=2		0.97	1.6	1.09	|NA|NA|NA	1.22	0.33451	27.4189
Q09161	570	NCBP1	NCBP1_HUMAN Nuclear cap-binding protein subunit 1 OS=Homo sapiens OX=9606 GN=NCBP1 PE=1 SV=1			1.22		||NA|	1.22	NA	#VALUE!
Q15019	206	SEPTIN2	SEPT2_HUMAN Septin-2 OS=Homo sapiens OX=9606 GN=SEPTIN2 PE=1 SV=1			1.22		||NA|	1.22	NA	#VALUE!
Q92900	459	UPF1	RENT1_HUMAN Regulator of nonsense transcripts 1 OS=Homo sapiens OX=9606 GN=UPF1 PE=1 SV=2			1.22		||NA|	1.22	NA	#VALUE!
P34897	504	SHMT2	GLYM_HUMAN Serine hydroxymethyltransferase, mitochondrial OS=Homo sapiens OX=9606 GN=SHMT2 PE=1 SV=3				1.22	|||NA	1.22	NA	#VALUE!
Q8TCG1	713	CIP2A	CIP2A_HUMAN Protein CIP2A OS=Homo sapiens OX=9606 GN=CIP2A PE=1 SV=2	1.31	1.3	1.13	1.135	NA|NA|0.0|0.00707	1.21875	0.0997	8.18051
Q12849	465	GRSF1	GRSF1_HUMAN G-rich sequence factor 1 OS=Homo sapiens OX=9606 GN=GRSF1 PE=1 SV=3		1.13	1.635	0.87	|0.0|0.06364|0.0	1.21167	0.38898	32.1028
P18621	116	RPL17	RL17_HUMAN 60S ribosomal protein L17 OS=Homo sapiens OX=9606 GN=RPL17 PE=1 SV=3	1.165	1.23	1.21	1.24	0.24749|NA|0.46205|0.23643	1.21125	0.03326	2.74592
P49593	200	PPM1F	PPM1F_HUMAN Protein phosphatase 1F OS=Homo sapiens OX=9606 GN=PPM1F PE=1 SV=3	1.21				NA|||	1.21	NA	#VALUE!
Q8N1G4	578	LRRC47	LRC47_HUMAN Leucine-rich repeat-containing protein 47 OS=Homo sapiens OX=9606 GN=LRRC47 PE=1 SV=1		1.21			|NA||	1.21	NA	#VALUE!
P23246	528	SFPQ	SFPQ_HUMAN Splicing factor, proline- and glutamine-rich OS=Homo sapiens OX=9606 GN=SFPQ PE=1 SV=2		1.21			|NA||	1.21	NA	#VALUE!
O95747	138	OXSR1	OXSR1_HUMAN Serine/threonine-protein kinase OSR1 OS=Homo sapiens OX=9606 GN=OXSR1 PE=1 SV=1		1.65		0.77	|NA||0.0	1.21	0.62225	51.4256
O43488	160	AKR7A2	ARK72_HUMAN Aflatoxin B1 aldehyde reductase member 2 OS=Homo sapiens OX=9606 GN=AKR7A2 PE=1 SV=3			1.21		||NA|	1.21	NA	#VALUE!
O76094	71	SRP72	SRP72_HUMAN Signal recognition particle subunit SRP72 OS=Homo sapiens OX=9606 GN=SRP72 PE=1 SV=3			1.21		||NA|	1.21	NA	#VALUE!
P42285	443	MTREX	MTREX_HUMAN Exosome RNA helicase MTR4 OS=Homo sapiens OX=9606 GN=MTREX PE=1 SV=3			1.27	1.15	||0.02828|0.32332	1.21	0.08485	7.0124
Q96SB4	204	SRPK1	SRPK1_HUMAN SRSF protein kinase 1 OS=Homo sapiens OX=9606 GN=SRPK1 PE=1 SV=2			1.21		||0.0|	1.21	NA	#VALUE!
P11413	186	G6PD	G6PD_HUMAN Glucose-6-phosphate 1-dehydrogenase OS=Homo sapiens OX=9606 GN=G6PD PE=1 SV=4	1.11			1.29	NA|||0.60308	1.2	0.12728	10.6067
Q9Y2Q3	75	GSTK1	GSTK1_HUMAN Glutathione S-transferase kappa 1 OS=Homo sapiens OX=9606 GN=GSTK1 PE=1 SV=3		1.2	1.2		|NA|NA|	1.2	0	0
Q9BVJ6	193	UTP14A	UT14A_HUMAN U3 small nucleolar RNA-associated protein 14 homolog A OS=Homo sapiens OX=9606 GN=UTP14A PE=1 SV=1			1.2		||NA|	1.2	NA	#VALUE!
O75934	159	BCAS2	SPF27_HUMAN Pre-mRNA-splicing factor SPF27 OS=Homo sapiens OX=9606 GN=BCAS2 PE=1 SV=1			1.2		||NA|	1.2	NA	#VALUE!
P61163	106	ACTR1A	ACTZ_HUMAN Alpha-centractin OS=Homo sapiens OX=9606 GN=ACTR1A PE=1 SV=1			1.07	1.33	||NA|NA	1.2	0.18385	15.3208
P49327	1516	FASN	FAS_HUMAN Fatty acid synthase OS=Homo sapiens OX=9606 GN=FASN PE=1 SV=3			0.91	1.48	||NA|NA	1.195	0.40305	33.728
Q9Y224	52	RTRAF	RTRAF_HUMAN RNA transcription, translation and transport factor protein OS=Homo sapiens OX=9606 GN=RTRAF PE=1 SV=1	1.13	1.255			NA|0.09192||	1.1925	0.08839	7.41216
Q9UHJ6	365	SHPK	SHPK_HUMAN Sedoheptulokinase OS=Homo sapiens OX=9606 GN=SHPK PE=1 SV=3			1.19		||NA|	1.19	NA	#VALUE!
P30876	1021	POLR2B	RPB2_HUMAN DNA-directed RNA polymerase II subunit RPB2 OS=Homo sapiens OX=9606 GN=POLR2B PE=1 SV=1			1.69	0.69	||NA|NA	1.19	0.70711	59.421
O75533	682	SF3B1	SF3B1_HUMAN Splicing factor 3B subunit 1 OS=Homo sapiens OX=9606 GN=SF3B1 PE=1 SV=3				1.19	|||NA	1.19	NA	#VALUE!
P05388	81	RPLP0	RLA0_HUMAN 60S acidic ribosomal protein P0 OS=Homo sapiens OX=9606 GN=RPLP0 PE=1 SV=1				1.19	|||NA	1.19	NA	#VALUE!
P31930	239	UQCRC1	QCR1_HUMAN Cytochrome b-c1 complex subunit 1, mitochondrial OS=Homo sapiens OX=9606 GN=UQCRC1 PE=1 SV=3				1.19	|||NA	1.19	NA	#VALUE!
Q14554	348	PDIA5	PDIA5_HUMAN Protein disulfide-isomerase A5 OS=Homo sapiens OX=9606 GN=PDIA5 PE=1 SV=1	1.52		0.85		NA||NA|	1.185	0.47376	39.9797
P52597	354	HNRNPF	HNRPF_HUMAN Heterogeneous nuclear ribonucleoprotein F OS=Homo sapiens OX=9606 GN=HNRNPF PE=1 SV=3	1.18				NA|||	1.18	NA	#VALUE!
P05198	114	EIF2S1	IF2A_HUMAN Eukaryotic translation initiation factor 2 subunit 1 OS=Homo sapiens OX=9606 GN=EIF2S1 PE=1 SV=3	1.18				NA|||	1.18	NA	#VALUE!
Q6P2E9	966	EDC4	EDC4_HUMAN Enhancer of mRNA-decapping protein 4 OS=Homo sapiens OX=9606 GN=EDC4 PE=1 SV=1		1.18			|NA||	1.18	NA	#VALUE!
P30405	168	PPIF	PPIF_HUMAN Peptidyl-prolyl cis-trans isomerase F, mitochondrial OS=Homo sapiens OX=9606 GN=PPIF PE=1 SV=1			1.18		||NA|	1.18	NA	#VALUE!
Q9Y5M8	121	SRPRB	SRPRB_HUMAN Signal recognition particle receptor subunit beta OS=Homo sapiens OX=9606 GN=SRPRB PE=1 SV=3			1.18		||NA|	1.18	NA	#VALUE!
Q92616	1551	GCN1	GCN1_HUMAN eIF-2-alpha kinase activator GCN1 OS=Homo sapiens OX=9606 GN=GCN1 PE=1 SV=6	1.42		0.935		0.0||0.12021|	1.1775	0.34295	29.1253
Q92945	332	KHSRP	FUBP2_HUMAN Far upstream element-binding protein 2 OS=Homo sapiens OX=9606 GN=KHSRP PE=1 SV=4		1.53		0.82	|NA||1.01928	1.175	0.50205	42.7277
P23258	115	TUBG1	TBG1_HUMAN Tubulin gamma-1 chain OS=Homo sapiens OX=9606 GN=TUBG1 PE=1 SV=2			1.08	1.27	||NA|0.46669	1.175	0.13435	11.434
P30084	122	ECHS1	ECHM_HUMAN Enoyl-CoA hydratase, mitochondrial OS=Homo sapiens OX=9606 GN=ECHS1 PE=1 SV=4		1.03		1.315	|NA||0.33234	1.1725	0.20153	17.1881
P56378	58	ATP5MPL	ATP68_HUMAN ATP synthase subunit ATP5MPL, mitochondrial OS=Homo sapiens OX=9606 GN=ATP5MPL PE=1 SV=1	1.17				NA|||	1.17	NA	#VALUE!
Q9H9Y6	18	POLR1B	RPA2_HUMAN DNA-directed RNA polymerase I subunit RPA2 OS=Homo sapiens OX=9606 GN=POLR1B PE=1 SV=2	1.17				NA|||	1.17	NA	#VALUE!
Q09161	462	NCBP1	NCBP1_HUMAN Nuclear cap-binding protein subunit 1 OS=Homo sapiens OX=9606 GN=NCBP1 PE=1 SV=1			1.17		||NA|	1.17	NA	#VALUE!
Q9UHC7	390	MKRN1	MKRN1_HUMAN E3 ubiquitin-protein ligase makorin-1 OS=Homo sapiens OX=9606 GN=MKRN1 PE=1 SV=3			1.17		||NA|	1.17	NA	#VALUE!
Q92616	2189	GCN1	GCN1_HUMAN eIF-2-alpha kinase activator GCN1 OS=Homo sapiens OX=9606 GN=GCN1 PE=1 SV=6			1.17		||NA|	1.17	NA	#VALUE!
P05388	68	RPLP0	RLA0_HUMAN 60S acidic ribosomal protein P0 OS=Homo sapiens OX=9606 GN=RPLP0 PE=1 SV=1			1.27	1.07	||0.03697|NA	1.17	0.14142	12.0872
Q9UHI6	324	DDX20	DDX20_HUMAN Probable ATP-dependent RNA helicase DDX20 OS=Homo sapiens OX=9606 GN=DDX20 PE=1 SV=2			1.71	0.63	||NA|NA	1.17	0.76368	65.2718
P30153	520	PPP2R1A	2AAA_HUMAN Serine/threonine-protein phosphatase 2A 65 kDa regulatory subunit A alpha isoform OS=Homo sapiens OX=9606 GN=PPP2R1A PE=1 SV=4			1.17		||NA|	1.17	NA	#VALUE!
P31153	277	MAT2A	METK2_HUMAN S-adenosylmethionine synthase isoform type-2 OS=Homo sapiens OX=9606 GN=MAT2A PE=1 SV=1				1.17	|||NA	1.17	NA	#VALUE!
O14980	988	XPO1	XPO1_HUMAN Exportin-1 OS=Homo sapiens OX=9606 GN=XPO1 PE=1 SV=1	1.18		1.14		NA||NA|	1.16	0.02828	2.43793
P14373	127	TRIM27	TRI27_HUMAN Zinc finger protein RFP OS=Homo sapiens OX=9606 GN=TRIM27 PE=1 SV=1	1.16				NA|||	1.16	NA	#VALUE!
Q9HCC0	57	MCCC2	MCCB_HUMAN Methylcrotonoyl-CoA carboxylase beta chain, mitochondrial OS=Homo sapiens OX=9606 GN=MCCC2 PE=1 SV=1		0.85	1.47		|NA|NA|	1.16	0.43841	37.794
P61160	87	ACTR2	ARP2_HUMAN Actin-related protein 2 OS=Homo sapiens OX=9606 GN=ACTR2 PE=1 SV=1			1.23	1.09	||NA|NA	1.16	0.09899	8.53362
A5YKK6	1949	CNOT1	CNOT1_HUMAN CCR4-NOT transcription complex subunit 1 OS=Homo sapiens OX=9606 GN=CNOT1 PE=1 SV=2				1.16	|||NA	1.16	NA	#VALUE!
Q02218	127	OGDH	ODO1_HUMAN 2-oxoglutarate dehydrogenase, mitochondrial OS=Homo sapiens OX=9606 GN=OGDH PE=1 SV=3				1.16	|||NA	1.16	NA	#VALUE!
Q9BQ69	320	MACROD1	MACD1_HUMAN ADP-ribose glycohydrolase MACROD1 OS=Homo sapiens OX=9606 GN=MACROD1 PE=1 SV=2				1.16	|||NA	1.16	NA	#VALUE!
Q9Y265	429	RUVBL1	RUVB1_HUMAN RuvB-like 1 OS=Homo sapiens OX=9606 GN=RUVBL1 PE=1 SV=1	1.15				NA|||	1.15	NA	#VALUE!
Q9BQG0	1132	MYBBP1A	MBB1A_HUMAN Myb-binding protein 1A OS=Homo sapiens OX=9606 GN=MYBBP1A PE=1 SV=2		1.15			|NA||	1.15	NA	#VALUE!
P47897	368	QARS1	SYQ_HUMAN Glutamine--tRNA ligase OS=Homo sapiens OX=9606 GN=QARS1 PE=1 SV=1			1.15		||NA|	1.15	NA	#VALUE!
P07237	25	P4HB	PDIA1_HUMAN Protein disulfide-isomerase OS=Homo sapiens OX=9606 GN=P4HB PE=1 SV=3			1.15		||NA|	1.15	NA	#VALUE!
P46977	69	STT3A	STT3A_HUMAN Dolichyl-diphosphooligosaccharide--protein glycosyltransferase subunit STT3A OS=Homo sapiens OX=9606 GN=STT3A PE=1 SV=2			1.15		||0.0|	1.15	NA	#VALUE!
A0AVT1	91	UBA6	UBA6_HUMAN Ubiquitin-like modifier-activating enzyme 6 OS=Homo sapiens OX=9606 GN=UBA6 PE=1 SV=1				1.15	|||NA	1.15	NA	#VALUE!
P25205	308	MCM3	MCM3_HUMAN DNA replication licensing factor MCM3 OS=Homo sapiens OX=9606 GN=MCM3 PE=1 SV=3				1.15	|||NA	1.15	NA	#VALUE!
P48147	364	PREP	PPCE_HUMAN Prolyl endopeptidase OS=Homo sapiens OX=9606 GN=PREP PE=1 SV=2				1.15	|||NA	1.15	NA	#VALUE!
P49327	1345	FASN	FAS_HUMAN Fatty acid synthase OS=Homo sapiens OX=9606 GN=FASN PE=1 SV=3				1.15	|||NA	1.15	NA	#VALUE!
Q14320	285	FAM50A	FA50A_HUMAN Protein FAM50A OS=Homo sapiens OX=9606 GN=FAM50A PE=1 SV=2		1.23	1.06		|NA|NA|	1.145	0.12021	10.4987
Q9Y3I0	80	RTCB	RTCB_HUMAN RNA-splicing ligase RtcB homolog OS=Homo sapiens OX=9606 GN=RTCB PE=1 SV=1		0.58	1.015	1.835	|NA|0.13435|0.07778	1.14333	0.63727	55.7381
Q7Z6Z7	165	HUWE1	HUWE1_HUMAN E3 ubiquitin-protein ligase HUWE1 OS=Homo sapiens OX=9606 GN=HUWE1 PE=1 SV=3		1.14			|NA||	1.14	NA	#VALUE!
Q9Y247	303	FAM50B	FA50B_HUMAN Protein FAM50B OS=Homo sapiens OX=9606 GN=FAM50B PE=1 SV=1				1.14	|||NA	1.14	NA	#VALUE!
P52292	479	KPNA2	IMA1_HUMAN Importin subunit alpha-1 OS=Homo sapiens OX=9606 GN=KPNA2 PE=1 SV=1			0.99	1.285	||NA|0.26163	1.1375	0.2086	18.3385
Q13144	192	EIF2B5	EI2BE_HUMAN Translation initiation factor eIF-2B subunit epsilon OS=Homo sapiens OX=9606 GN=EIF2B5 PE=1 SV=3		1.13			|NA||	1.13	NA	#VALUE!
P62701	17	RPS4X	RS4X_HUMAN 40S ribosomal protein S4, X isoform OS=Homo sapiens OX=9606 GN=RPS4X PE=1 SV=2		1.13			|NA||	1.13	NA	#VALUE!
O76003	172	GLRX3	GLRX3_HUMAN Glutaredoxin-3 OS=Homo sapiens OX=9606 GN=GLRX3 PE=1 SV=2			1.13		||NA|	1.13	NA	#VALUE!
Q9UI30	6	TRMT112	TR112_HUMAN Multifunctional methyltransferase subunit TRM112-like protein OS=Homo sapiens OX=9606 GN=TRMT112 PE=1 SV=1	0.94	1.26		1.18	NA|NA||0.04041	1.12667	0.16653	14.7807
Q9NSE4	461	IARS2	SYIM_HUMAN Isoleucine--tRNA ligase, mitochondrial OS=Homo sapiens OX=9606 GN=IARS2 PE=1 SV=2	0.99			1.26	NA|||0.83439	1.125	0.19092	16.9707
Q86VP6	396	CAND1	CAND1_HUMAN Cullin-associated NEDD8-dissociated protein 1 OS=Homo sapiens OX=9606 GN=CAND1 PE=1 SV=2				1.125	|||0.19092	1.125	NA	#VALUE!
Q13813	2085	SPTAN1	SPTN1_HUMAN Spectrin alpha chain, non-erythrocytic 1 OS=Homo sapiens OX=9606 GN=SPTAN1 PE=1 SV=3				1.12	|||NA	1.12	NA	#VALUE!
Q5T2N8	172	ATAD3C	ATD3C_HUMAN ATPase family AAA domain-containing protein 3C OS=Homo sapiens OX=9606 GN=ATAD3C PE=2 SV=2				1.12	|||NA	1.12	NA	#VALUE!
P06576	477	ATP5F1B	ATPB_HUMAN ATP synthase subunit beta, mitochondrial OS=Homo sapiens OX=9606 GN=ATP5F1B PE=1 SV=3	1.36	0.87			NA|NA||	1.115	0.34648	31.0744
P18754	130	RCC1	RCC1_HUMAN Regulator of chromosome condensation OS=Homo sapiens OX=9606 GN=RCC1 PE=1 SV=1	0.95		1.28		NA||0.38184|	1.115	0.23335	20.9283
Q69YQ0	597	SPECC1L	CYTSA_HUMAN Cytospin-A OS=Homo sapiens OX=9606 GN=SPECC1L PE=1 SV=2		1.15	1.08		|NA|NA|	1.115	0.0495	4.43946
P23246	255	SFPQ	SFPQ_HUMAN Splicing factor, proline- and glutamine-rich OS=Homo sapiens OX=9606 GN=SFPQ PE=1 SV=2	0.83	1.12	1.33	1.17	NA|0.05657|0.2442|0.40278	1.1125	0.20855	18.7461
P35612	385	ADD2	ADDB_HUMAN Beta-adducin OS=Homo sapiens OX=9606 GN=ADD2 PE=1 SV=3	1.11				NA|||	1.11	NA	#VALUE!
Q01433	564	AMPD2	AMPD2_HUMAN AMP deaminase 2 OS=Homo sapiens OX=9606 GN=AMPD2 PE=1 SV=2		1.11			|NA||	1.11	NA	#VALUE!
Q8NC51	342	SERBP1	PAIRB_HUMAN Plasminogen activator inhibitor 1 RNA-binding protein OS=Homo sapiens OX=9606 GN=SERBP1 PE=1 SV=2		1.11			|NA||	1.11	NA	#VALUE!
P82675	369	MRPS5	RT05_HUMAN 28S ribosomal protein S5, mitochondrial OS=Homo sapiens OX=9606 GN=MRPS5 PE=1 SV=2			1.11		||0.52326|	1.11	NA	#VALUE!
P55209	188	NAP1L1	NP1L1_HUMAN Nucleosome assembly protein 1-like 1 OS=Homo sapiens OX=9606 GN=NAP1L1 PE=1 SV=1			1.04	1.18	||NA|NA	1.11	0.09899	8.91802
Q15046	97	KARS1	SYK_HUMAN Lysine--tRNA ligase OS=Homo sapiens OX=9606 GN=KARS1 PE=1 SV=3				1.11	|||0.0	1.11	NA	#VALUE!
P43490	491	NAMPT	NAMPT_HUMAN Nicotinamide phosphoribosyltransferase OS=Homo sapiens OX=9606 GN=NAMPT PE=1 SV=1	1.085			1.13	0.13435|||NA	1.1075	0.03182	2.87314
Q8N163	153	CCAR2	CCAR2_HUMAN Cell cycle and apoptosis regulator protein 2 OS=Homo sapiens OX=9606 GN=CCAR2 PE=1 SV=2			1.27	0.94	||NA|NA	1.105	0.23335	21.1176
O60264	660	SMARCA5	SMCA5_HUMAN SWI/SNF-related matrix-associated actin-dependent regulator of chromatin subfamily A member 5 OS=Homo sapiens OX=9606 GN=SMARCA5 PE=1 SV=1		1.1			|NA||	1.1	NA	#VALUE!
Q86UP2	910	KTN1	KTN1_HUMAN Kinectin OS=Homo sapiens OX=9606 GN=KTN1 PE=1 SV=1			1.1		||NA|	1.1	NA	#VALUE!
O15226	61	NKRF	NKRF_HUMAN NF-kappa-B-repressing factor OS=Homo sapiens OX=9606 GN=NKRF PE=1 SV=2			1.1		||NA|	1.1	NA	#VALUE!
Q7Z6Z7	2522	HUWE1	HUWE1_HUMAN E3 ubiquitin-protein ligase HUWE1 OS=Homo sapiens OX=9606 GN=HUWE1 PE=1 SV=3				1.1	|||NA	1.1	NA	#VALUE!
Q9NUQ9	309	CYRIB	CYRIB_HUMAN CYFIP-related Rac1 interactor B OS=Homo sapiens OX=9606 GN=CYRIB PE=1 SV=1	0.75		1.41	1.125	NA||0.0|0.40305	1.095	0.33102	30.2301
O75694	948	NUP155	NU155_HUMAN Nuclear pore complex protein Nup155 OS=Homo sapiens OX=9606 GN=NUP155 PE=1 SV=1	1.09				NA|||	1.09	NA	#VALUE!
Q9Y265	241	RUVBL1	RUVB1_HUMAN RuvB-like 1 OS=Homo sapiens OX=9606 GN=RUVBL1 PE=1 SV=1	1.09				NA|||	1.09	NA	#VALUE!
Q9UMR2	425	DDX19B	DD19B_HUMAN ATP-dependent RNA helicase DDX19B OS=Homo sapiens OX=9606 GN=DDX19B PE=1 SV=1			1.09		||NA|	1.09	NA	#VALUE!
O43464	170	HTRA2	HTRA2_HUMAN Serine protease HTRA2, mitochondrial OS=Homo sapiens OX=9606 GN=HTRA2 PE=1 SV=2			1.09		||NA|	1.09	NA	#VALUE!
P23246	553	SFPQ	SFPQ_HUMAN Splicing factor, proline- and glutamine-rich OS=Homo sapiens OX=9606 GN=SFPQ PE=1 SV=2				1.09	|||NA	1.09	NA	#VALUE!
Q12931	510	TRAP1	TRAP1_HUMAN Heat shock protein 75 kDa, mitochondrial OS=Homo sapiens OX=9606 GN=TRAP1 PE=1 SV=3				1.09	|||NA	1.09	NA	#VALUE!
Q7Z6Z7	3115	HUWE1	HUWE1_HUMAN E3 ubiquitin-protein ligase HUWE1 OS=Homo sapiens OX=9606 GN=HUWE1 PE=1 SV=3				1.09	|||NA	1.09	NA	#VALUE!
Q96EK5	304	KIFBP	KBP_HUMAN KIF-binding protein OS=Homo sapiens OX=9606 GN=KIFBP PE=1 SV=1	1.08				NA|||	1.08	NA	#VALUE!
Q8WWM7	385	ATXN2L	ATX2L_HUMAN Ataxin-2-like protein OS=Homo sapiens OX=9606 GN=ATXN2L PE=1 SV=2		1.08			|NA||	1.08	NA	#VALUE!
P23921	87	RRM1	RIR1_HUMAN Ribonucleoside-diphosphate reductase large subunit OS=Homo sapiens OX=9606 GN=RRM1 PE=1 SV=1		1.08			|0.27873||	1.08	NA	#VALUE!
Q02543	122	RPL18A	RL18A_HUMAN 60S ribosomal protein L18a OS=Homo sapiens OX=9606 GN=RPL18A PE=1 SV=2		1.08			|NA||	1.08	NA	#VALUE!
Q13573	279	SNW1	SNW1_HUMAN SNW domain-containing protein 1 OS=Homo sapiens OX=9606 GN=SNW1 PE=1 SV=1			1.34	0.82	||NA|NA	1.08	0.3677	34.0463
P47897	756	QARS1	SYQ_HUMAN Glutamine--tRNA ligase OS=Homo sapiens OX=9606 GN=QARS1 PE=1 SV=1				1.08	|||NA	1.08	NA	#VALUE!
Q96A72	21	MAGOHB	MGN2_HUMAN Protein mago nashi homolog 2 OS=Homo sapiens OX=9606 GN=MAGOHB PE=1 SV=1				1.08	|||NA	1.08	NA	#VALUE!
P29692	269	EEF1D	EF1D_HUMAN Elongation factor 1-delta OS=Homo sapiens OX=9606 GN=EEF1D PE=1 SV=5	0.93	1.26	1.03		NA|0.04243|0.08485|	1.07333	0.16921	15.765
O43488	268	AKR7A2	ARK72_HUMAN Aflatoxin B1 aldehyde reductase member 2 OS=Homo sapiens OX=9606 GN=AKR7A2 PE=1 SV=3	0.76		1.375	1.08	NA||0.2192|0.59936	1.07167	0.30758	28.701
P14923	535	JUP	PLAK_HUMAN Junction plakoglobin OS=Homo sapiens OX=9606 GN=JUP PE=1 SV=3	1.49			0.65	NA|||NA	1.07	0.59397	55.5112
F5HIC6	495	vIRF-3	VIRF3_HHV8P Viral IRF3-like protein OS=Human herpesvirus 8 type P (isolate GK18) OX=868565 GN=vIRF-3 PE=1 SV=1				1.07	|||NA	1.07	NA	#VALUE!
P50851	2004	LRBA	LRBA_HUMAN Lipopolysaccharide-responsive and beige-like anchor protein OS=Homo sapiens OX=9606 GN=LRBA PE=1 SV=4				1.07	|||NA	1.07	NA	#VALUE!
P01116	94	KRAS	RASK_HUMAN GTPase KRas OS=Homo sapiens OX=9606 GN=KRAS PE=1 SV=1				1.07	|||NA	1.07	NA	#VALUE!
Q13310	627	PABPC4	PABP4_HUMAN Polyadenylate-binding protein 4 OS=Homo sapiens OX=9606 GN=PABPC4 PE=1 SV=1				1.07	|||NA	1.07	NA	#VALUE!
O75439	249	PMPCB	MPPB_HUMAN Mitochondrial-processing peptidase subunit beta OS=Homo sapiens OX=9606 GN=PMPCB PE=1 SV=2				1.07	|||NA	1.07	NA	#VALUE!
P61081	88	UBE2M	UBC12_HUMAN NEDD8-conjugating enzyme Ubc12 OS=Homo sapiens OX=9606 GN=UBE2M PE=1 SV=1		0.93		1.2	|NA||0.65054	1.065	0.19092	17.9268
O00410	847	IPO5	IPO5_HUMAN Importin-5 OS=Homo sapiens OX=9606 GN=IPO5 PE=1 SV=4		1.19	0.91	1.09	|0.0|NA|0.08485	1.06333	0.14189	13.3439
O15226	650	NKRF	NKRF_HUMAN NF-kappa-B-repressing factor OS=Homo sapiens OX=9606 GN=NKRF PE=1 SV=2		1.06			|NA||	1.06	NA	#VALUE!
Q8WUM4	61	PDCD6IP	PDC6I_HUMAN Programmed cell death 6-interacting protein OS=Homo sapiens OX=9606 GN=PDCD6IP PE=1 SV=1			1.07	1.05	||NA|0.36491	1.06	0.01414	1.33396
P06493	162	CDK1	CDK1_HUMAN Cyclin-dependent kinase 1 OS=Homo sapiens OX=9606 GN=CDK1 PE=1 SV=3			1.06		||NA|	1.06	NA	#VALUE!
Q9P0L0	163	VAPA	VAPA_HUMAN Vesicle-associated membrane protein-associated protein A OS=Homo sapiens OX=9606 GN=VAPA PE=1 SV=3				1.06	|||NA	1.06	NA	#VALUE!
P32322	140	PYCR1	P5CR1_HUMAN Pyrroline-5-carboxylate reductase 1, mitochondrial OS=Homo sapiens OX=9606 GN=PYCR1 PE=1 SV=2	0.52		1.44	1.19	NA||NA|NA	1.05	0.47571	45.3057
Q9H993	37	ARMT1	ARMT1_HUMAN Damage-control phosphatase ARMT1 OS=Homo sapiens OX=9606 GN=ARMT1 PE=1 SV=1			1.05		||NA|	1.05	NA	#VALUE!
[truncated: 176 more rows]

## Sheet: 1-1
Leading AC	Site	Genename	Description	All ratio repeat1	All ratio repeat2	All ratio repeat3	All ratio repeat4	All SD Ratio	Ratio average	Ratio SD	CV
Q5SWL8	179	PRAMEF19	PRA19_HUMAN PRAME family member 19 OS=Homo sapiens OX=9606 GN=PRAMEF19 PE=3 SV=2				10.34	|||NA	10.34	NA	#VALUE!
Q96IL0	127	COA8	COA8_HUMAN Cytochrome c oxidase assembly factor 8 OS=Homo sapiens OX=9606 GN=COA8 PE=1 SV=3		5.7			|NA||	5.7	NA	#VALUE!
Q9H000	202	MKRN2	MKRN2_HUMAN Probable E3 ubiquitin-protein ligase makorin-2 OS=Homo sapiens OX=9606 GN=MKRN2 PE=1 SV=2			4.56		||NA|	4.56	NA	#VALUE!
Q5H9R7	200	PPP6R3	PP6R3_HUMAN Serine/threonine-protein phosphatase 6 regulatory subunit 3 OS=Homo sapiens OX=9606 GN=PPP6R3 PE=1 SV=2	2.03	7.73	3.7	1.08	0.0|NA|NA|0.0	3.635	2.93697	80.797
Q8N684	319	CPSF7	CPSF7_HUMAN Cleavage and polyadenylation specificity factor subunit 7 OS=Homo sapiens OX=9606 GN=CPSF7 PE=1 SV=1			2.97		||NA|	2.97	NA	#VALUE!
Q92615	420	LARP4B	LAR4B_HUMAN La-related protein 4B OS=Homo sapiens OX=9606 GN=LARP4B PE=1 SV=3		1.13	4.54		|NA|NA|	2.835	2.41123	85.0522
Q01130	100	SRSF2	SRSF2_HUMAN Serine/arginine-rich splicing factor 2 OS=Homo sapiens OX=9606 GN=SRSF2 PE=1 SV=4				2.68	|||NA	2.68	NA	#VALUE!
O43143	317	DHX15	DHX15_HUMAN Pre-mRNA-splicing factor ATP-dependent RNA helicase DHX15 OS=Homo sapiens OX=9606 GN=DHX15 PE=1 SV=2			2.59		||NA|	2.59	NA	#VALUE!
Q8WXF1	356	PSPC1	PSPC1_HUMAN Paraspeckle component 1 OS=Homo sapiens OX=9606 GN=PSPC1 PE=1 SV=1			2.5		||NA|	2.5	NA	#VALUE!
P24539	164	ATP5PB	AT5F1_HUMAN ATP synthase F(0) complex subunit B1, mitochondrial OS=Homo sapiens OX=9606 GN=ATP5PB PE=1 SV=2	0.9	1	0.93	6.79	NA|0.0|0.0|8.48528	2.405	2.92363	121.565
Q6NXG1	119	ESRP1	ESRP1_HUMAN Epithelial splicing regulatory protein 1 OS=Homo sapiens OX=9606 GN=ESRP1 PE=1 SV=2	2.36				NA|||	2.36	NA	#VALUE!
Q14103	79	HNRNPD	HNRPD_HUMAN Heterogeneous nuclear ribonucleoprotein D0 OS=Homo sapiens OX=9606 GN=HNRNPD PE=1 SV=1	1.77	3.08	2.095	2.47	NA|NA|0.8556|NA	2.35375	0.56234	23.8912
O60869	69	EDF1	EDF1_HUMAN Endothelial differentiation-related factor 1 OS=Homo sapiens OX=9606 GN=EDF1 PE=1 SV=1			2.33		||NA|	2.33	NA	#VALUE!
P23246	247	SFPQ	SFPQ_HUMAN Splicing factor, proline- and glutamine-rich OS=Homo sapiens OX=9606 GN=SFPQ PE=1 SV=2			2.3		||NA|	2.3	NA	#VALUE!
Q14152	510	EIF3A	EIF3A_HUMAN Eukaryotic translation initiation factor 3 subunit A OS=Homo sapiens OX=9606 GN=EIF3A PE=1 SV=1				2.2	|||NA	2.2	NA	#VALUE!
P22626	84	HNRNPA2B1	ROA2_HUMAN Heterogeneous nuclear ribonucleoproteins A2/B1 OS=Homo sapiens OX=9606 GN=HNRNPA2B1 PE=1 SV=2	0.97	2.81		2.39	NA|NA||NA	2.05667	0.96423	46.8831
Q9ULW0	610	TPX2	TPX2_HUMAN Targeting protein for Xklp2 OS=Homo sapiens OX=9606 GN=TPX2 PE=1 SV=2		2.01			|NA||	2.01	NA	#VALUE!
P62910	68	RPL32	RL32_HUMAN 60S ribosomal protein L32 OS=Homo sapiens OX=9606 GN=RPL32 PE=1 SV=2				2.01	|||NA	2.01	NA	#VALUE!
P08133	650	ANXA6	ANXA6_HUMAN Annexin A6 OS=Homo sapiens OX=9606 GN=ANXA6 PE=1 SV=3				2.01	|||NA	2.01	NA	#VALUE!
Q14204	2252	DYNC1H1	DYHC1_HUMAN Cytoplasmic dynein 1 heavy chain 1 OS=Homo sapiens OX=9606 GN=DYNC1H1 PE=1 SV=5				2	|||NA	2	NA	#VALUE!
Q10471	58	GALNT2	GALT2_HUMAN Polypeptide N-acetylgalactosaminyltransferase 2 OS=Homo sapiens OX=9606 GN=GALNT2 PE=1 SV=1				1.97	|||NA	1.97	NA	#VALUE!
Q99417	51	MYCBP	MYCBP_HUMAN c-Myc-binding protein OS=Homo sapiens OX=9606 GN=MYCBP PE=1 SV=3	1.195		3.445	1.17	0.17193||1.88206|NA	1.93667	1.30631	67.4513
P56556	108	NDUFA6	NDUA6_HUMAN NADH dehydrogenase [ubiquinone] 1 alpha subcomplex subunit 6 OS=Homo sapiens OX=9606 GN=NDUFA6 PE=1 SV=4	1.93				NA|||	1.93	NA	#VALUE!
Q6FI13	124	H2AC18	H2A2A_HUMAN Histone H2A type 2-A OS=Homo sapiens OX=9606 GN=H2AC18 PE=1 SV=3				1.93	|||0.41284	1.93	NA	#VALUE!
O94776	421	MTA2	MTA2_HUMAN Metastasis-associated protein MTA2 OS=Homo sapiens OX=9606 GN=MTA2 PE=1 SV=1		1.905			|0.92631||	1.905	NA	#VALUE!
P22314	643	UBA1	UBA1_HUMAN Ubiquitin-like modifier-activating enzyme 1 OS=Homo sapiens OX=9606 GN=UBA1 PE=1 SV=3	2.17	1.53	1.96		NA|1.00409|0.0|	1.88667	0.32624	17.2918
O43324	174	EEF1E1	MCA3_HUMAN Eukaryotic translation elongation factor 1 epsilon-1 OS=Homo sapiens OX=9606 GN=EEF1E1 PE=1 SV=1				1.885	|||0.23335	1.885	NA	#VALUE!
O43819	203	SCO2	SCO2_HUMAN Protein SCO2 homolog, mitochondrial OS=Homo sapiens OX=9606 GN=SCO2 PE=1 SV=3		1.78			|NA||	1.78	NA	#VALUE!
Q15022	112	SUZ12	SUZ12_HUMAN Polycomb protein SUZ12 OS=Homo sapiens OX=9606 GN=SUZ12 PE=1 SV=3		1.12	3.18	1.03	|0.0|NA|0.15556	1.77667	1.21616	68.4517
O15258	179	RER1	RER1_HUMAN Protein RER1 OS=Homo sapiens OX=9606 GN=RER1 PE=1 SV=1			1.77		||NA|	1.77	NA	#VALUE!
Q8N766	720	EMC1	EMC1_HUMAN ER membrane protein complex subunit 1 OS=Homo sapiens OX=9606 GN=EMC1 PE=1 SV=1				1.74	|||NA	1.74	NA	#VALUE!
Q9NXW2	374	DNAJB12	DJB12_HUMAN DnaJ homolog subfamily B member 12 OS=Homo sapiens OX=9606 GN=DNAJB12 PE=1 SV=5			1.73		||NA|	1.73	NA	#VALUE!
P14625	146	HSP90B1	ENPL_HUMAN Endoplasmin OS=Homo sapiens OX=9606 GN=HSP90B1 PE=1 SV=1				1.73	|||NA	1.73	NA	#VALUE!
Q8NBM4	344	UBAC2	UBAC2_HUMAN Ubiquitin-associated domain-containing protein 2 OS=Homo sapiens OX=9606 GN=UBAC2 PE=1 SV=1		1.72			|NA||	1.72	NA	#VALUE!
Q92900	858	UPF1	RENT1_HUMAN Regulator of nonsense transcripts 1 OS=Homo sapiens OX=9606 GN=UPF1 PE=1 SV=2	1.28	1.15	2.71		NA|NA|NA|	1.71333	0.86558	50.5203
Q8N4V1	87	MMGT1	MMGT1_HUMAN Membrane magnesium transporter 1 OS=Homo sapiens OX=9606 GN=MMGT1 PE=1 SV=1		1.69			|NA||	1.69	NA	#VALUE!
Q8ND56	236	LSM14A	LS14A_HUMAN Protein LSM14 homolog A OS=Homo sapiens OX=9606 GN=LSM14A PE=1 SV=3		2.11	1.5	1.41	|NA|NA|NA	1.67333	0.38083	22.7588
Q8NC51	343	SERBP1	PAIRB_HUMAN Plasminogen activator inhibitor 1 RNA-binding protein OS=Homo sapiens OX=9606 GN=SERBP1 PE=1 SV=2				1.67	|||NA	1.67	NA	#VALUE!
P21333	671	FLNA	FLNA_HUMAN Filamin-A OS=Homo sapiens OX=9606 GN=FLNA PE=1 SV=4			1.07	2.26	||NA|NA	1.665	0.84146	50.5381
P24928	204	POLR2A	RPB1_HUMAN DNA-directed RNA polymerase II subunit RPB1 OS=Homo sapiens OX=9606 GN=POLR2A PE=1 SV=2		1.66			|NA||	1.66	NA	#VALUE!
Q6FI13	125	H2AC18	H2A2A_HUMAN Histone H2A type 2-A OS=Homo sapiens OX=9606 GN=H2AC18 PE=1 SV=3				1.66	|||0.5374	1.66	NA	#VALUE!
O60869	70	EDF1	EDF1_HUMAN Endothelial differentiation-related factor 1 OS=Homo sapiens OX=9606 GN=EDF1 PE=1 SV=1		1.04		2.255	|NA||0.24749	1.6475	0.85913	52.1475
P23246	252	SFPQ	SFPQ_HUMAN Splicing factor, proline- and glutamine-rich OS=Homo sapiens OX=9606 GN=SFPQ PE=1 SV=2			1.15	2.14	||NA|0.49809	1.645	0.70004	42.5556
O43852	30	CALU	CALU_HUMAN Calumenin OS=Homo sapiens OX=9606 GN=CALU PE=1 SV=2			1.44	1.81	||0.41012|NA	1.625	0.26163	16.1003
P07814	1093	EPRS1	SYEP_HUMAN Bifunctional glutamate/proline--tRNA ligase OS=Homo sapiens OX=9606 GN=EPRS1 PE=1 SV=5	1.3	0.995	0.9	3.26	0.26838|0.16263|0.26633|1.80363	1.61375	1.11069	68.8266
Q7L576	1058	CYFIP1	CYFP1_HUMAN Cytoplasmic FMR1-interacting protein 1 OS=Homo sapiens OX=9606 GN=CYFIP1 PE=1 SV=1			1.61		||0.0|	1.61	NA	#VALUE!
Q2M389	228	WASHC4	WASC4_HUMAN WASH complex subunit 4 OS=Homo sapiens OX=9606 GN=WASHC4 PE=1 SV=2			1.6		||NA|	1.6	NA	#VALUE!
Q9Y265	429	RUVBL1	RUVB1_HUMAN RuvB-like 1 OS=Homo sapiens OX=9606 GN=RUVBL1 PE=1 SV=1			1.6		||0.0|	1.6	NA	#VALUE!
Q13162	197	PRDX4	PRDX4_HUMAN Peroxiredoxin-4 OS=Homo sapiens OX=9606 GN=PRDX4 PE=1 SV=1	1.755	1.425			0.10607|0.43605||	1.59	0.23335	14.6761
P43487	8	RANBP1	RANG_HUMAN Ran-specific GTPase-activating protein OS=Homo sapiens OX=9606 GN=RANBP1 PE=1 SV=1			1.54	1.64	||0.89095|NA	1.59	0.07071	4.44717
Q9NRG9	71	AAAS	AAAS_HUMAN Aladin OS=Homo sapiens OX=9606 GN=AAAS PE=1 SV=1				1.59	|||NA	1.59	NA	#VALUE!
Q86XP3	821	DDX42	DDX42_HUMAN ATP-dependent RNA helicase DDX42 OS=Homo sapiens OX=9606 GN=DDX42 PE=1 SV=1			1.38	1.78	||NA|0.0	1.58	0.28284	17.9013
P69905	21	HBA1	HBA_HUMAN Hemoglobin subunit alpha OS=Homo sapiens OX=9606 GN=HBA1 PE=1 SV=2	0.85		2.29		NA||NA|	1.57	1.01823	64.8554
Q14498	325	RBM39	RBM39_HUMAN RNA-binding protein 39 OS=Homo sapiens OX=9606 GN=RBM39 PE=1 SV=2				1.57	|||NA	1.57	NA	#VALUE!
O00231	178	PSMD11	PSD11_HUMAN 26S proteasome non-ATPase regulatory subunit 11 OS=Homo sapiens OX=9606 GN=PSMD11 PE=1 SV=3				1.57	|||NA	1.57	NA	#VALUE!
Q16576	369	RBBP7	RBBP7_HUMAN Histone-binding protein RBBP7 OS=Homo sapiens OX=9606 GN=RBBP7 PE=1 SV=1			1.55		||NA|	1.55	NA	#VALUE!
P08670	462	VIM	VIME_HUMAN Vimentin OS=Homo sapiens OX=9606 GN=VIM PE=1 SV=4	0.88	0.725	2.1	2.49	NA|0.15119|0.80707|0.31379	1.54875	0.87856	56.727
P08670	461	VIM	VIME_HUMAN Vimentin OS=Homo sapiens OX=9606 GN=VIM PE=1 SV=4	1.18	0.76	2.11	2.135	0.26851|0.11756|0.64728|0.44636	1.54625	0.68721	44.4437
P49792	3186	RANBP2	RBP2_HUMAN E3 SUMO-protein ligase RanBP2 OS=Homo sapiens OX=9606 GN=RANBP2 PE=1 SV=2		1.54			|NA||	1.54	NA	#VALUE!
P31689	386	DNAJA1	DNJA1_HUMAN DnaJ homolog subfamily A member 1 OS=Homo sapiens OX=9606 GN=DNAJA1 PE=1 SV=2			1.52		||0.0|	1.52	NA	#VALUE!
Q6P2Q9	509	PRPF8	PRP8_HUMAN Pre-mRNA-processing-splicing factor 8 OS=Homo sapiens OX=9606 GN=PRPF8 PE=1 SV=2				1.52	|||NA	1.52	NA	#VALUE!
P61026	110	RAB10	RAB10_HUMAN Ras-related protein Rab-10 OS=Homo sapiens OX=9606 GN=RAB10 PE=1 SV=1	0.74		2.29		NA||NA|	1.515	1.09602	72.3446
P33176	205	KIF5B	KINH_HUMAN Kinesin-1 heavy chain OS=Homo sapiens OX=9606 GN=KIF5B PE=1 SV=1				1.51	|||NA	1.51	NA	#VALUE!
Q9BXS5	52	AP1M1	AP1M1_HUMAN AP-1 complex subunit mu-1 OS=Homo sapiens OX=9606 GN=AP1M1 PE=1 SV=3	1.5				NA|||	1.5	NA	#VALUE!
Q96EY7	436	PTCD3	PTCD3_HUMAN Pentatricopeptide repeat domain-containing protein 3, mitochondrial OS=Homo sapiens OX=9606 GN=PTCD3 PE=1 SV=3	1.5				NA|||	1.5	NA	#VALUE!
O00148	219	DDX39A	DX39A_HUMAN ATP-dependent RNA helicase DDX39A OS=Homo sapiens OX=9606 GN=DDX39A PE=1 SV=2				1.5	|||NA	1.5	NA	#VALUE!
P45954	334	ACADSB	ACDSB_HUMAN Short/branched chain specific acyl-CoA dehydrogenase, mitochondrial OS=Homo sapiens OX=9606 GN=ACADSB PE=1 SV=1	1.34		1.645		NA||0.67175|	1.4925	0.21567	14.4503
Q99613	715	EIF3C	EIF3C_HUMAN Eukaryotic translation initiation factor 3 subunit C OS=Homo sapiens OX=9606 GN=EIF3C PE=1 SV=1			1.36	1.62	||NA|NA	1.49	0.18385	12.3389
Q92616	615	GCN1	GCN1_HUMAN eIF-2-alpha kinase activator GCN1 OS=Homo sapiens OX=9606 GN=GCN1 PE=1 SV=6			1.49		||NA|	1.49	NA	#VALUE!
P63165	35	SUMO1	SUMO1_HUMAN Small ubiquitin-related modifier 1 OS=Homo sapiens OX=9606 GN=SUMO1 PE=1 SV=1	3.06	0.64		0.76	NA|NA||NA	1.48667	1.36387	91.7399
P23246	248	SFPQ	SFPQ_HUMAN Splicing factor, proline- and glutamine-rich OS=Homo sapiens OX=9606 GN=SFPQ PE=1 SV=2			1.65	1.315	||NA|0.06364	1.4825	0.23688	15.9784
Q15424	751	SAFB	SAFB1_HUMAN Scaffold attachment factor B1 OS=Homo sapiens OX=9606 GN=SAFB PE=1 SV=4			1.89	1.07	||NA|NA	1.48	0.57983	39.1777
Q8TC07	164	TBC1D15	TBC15_HUMAN TBC1 domain family member 15 OS=Homo sapiens OX=9606 GN=TBC1D15 PE=1 SV=2			1.48		||NA|	1.48	NA	#VALUE!
P69849	1033	NOMO3	NOMO3_HUMAN Nodal modulator 3 OS=Homo sapiens OX=9606 GN=NOMO3 PE=1 SV=2				1.475	|||0.5869	1.475	NA	#VALUE!
P02545	405	LMNA	LMNA_HUMAN Prelamin-A/C OS=Homo sapiens OX=9606 GN=LMNA PE=1 SV=1	1.47				NA|||	1.47	NA	#VALUE!
P56378	58	ATP5MPL	ATP68_HUMAN ATP synthase subunit ATP5MPL, mitochondrial OS=Homo sapiens OX=9606 GN=ATP5MPL PE=1 SV=1		0.45	2.13	1.81	|NA|0.71924|0.05686	1.46333	0.89204	60.9596
Q13283	31	G3BP1	G3BP1_HUMAN Ras GTPase-activating protein-binding protein 1 OS=Homo sapiens OX=9606 GN=G3BP1 PE=1 SV=1	1.17	1.54		1.67	NA|0.96231||0.77782	1.46	0.25942	17.7685
P30566	217	ADSL	PUR8_HUMAN Adenylosuccinate lyase OS=Homo sapiens OX=9606 GN=ADSL PE=1 SV=2			1.46		||NA|	1.46	NA	#VALUE!
P28331	444	NDUFS1	NDUS1_HUMAN NADH-ubiquinone oxidoreductase 75 kDa subunit, mitochondrial OS=Homo sapiens OX=9606 GN=NDUFS1 PE=1 SV=3			1.17	1.74	||NA|NA	1.455	0.40305	27.701
Q9NPA8	61	ENY2	ENY2_HUMAN Transcription and mRNA export factor ENY2 OS=Homo sapiens OX=9606 GN=ENY2 PE=1 SV=1	1.12		1.195	2.04	NA||0.3899|NA	1.45167	0.51089	35.1933
Q92804	158	TAF15	RBP56_HUMAN TATA-binding protein-associated factor 2N OS=Homo sapiens OX=9606 GN=TAF15 PE=1 SV=1			1.45		||0.3677|	1.45	NA	#VALUE!
Q12849	183	GRSF1	GRSF1_HUMAN G-rich sequence factor 1 OS=Homo sapiens OX=9606 GN=GRSF1 PE=1 SV=3	1.96	0.93			NA|NA||	1.445	0.72832	50.4028
P35579	1183	MYH9	MYH9_HUMAN Myosin-9 OS=Homo sapiens OX=9606 GN=MYH9 PE=1 SV=4	1.44				0.14142|||	1.44	NA	#VALUE!
Q14257	314	RCN2	RCN2_HUMAN Reticulocalbin-2 OS=Homo sapiens OX=9606 GN=RCN2 PE=1 SV=1	1.44				NA|||	1.44	NA	#VALUE!
P27695	116	APEX1	APEX1_HUMAN DNA-(apurinic or apyrimidinic site) endonuclease OS=Homo sapiens OX=9606 GN=APEX1 PE=1 SV=2		1.44			|NA||	1.44	NA	#VALUE!
P14550	87	AKR1A1	AK1A1_HUMAN Aldo-keto reductase family 1 member A1 OS=Homo sapiens OX=9606 GN=AKR1A1 PE=1 SV=3			1.44		||NA|	1.44	NA	#VALUE!
Q14697	882	GANAB	GANAB_HUMAN Neutral alpha-glucosidase AB OS=Homo sapiens OX=9606 GN=GANAB PE=1 SV=3	1.49	1.54	1.27		NA|NA|NA|	1.43333	0.14364	10.0214
P31948	479	STIP1	STIP1_HUMAN Stress-induced-phosphoprotein 1 OS=Homo sapiens OX=9606 GN=STIP1 PE=1 SV=1		2	1.2	1.06	|NA|0.32527|NA	1.42	0.50715	35.7148
Q8IWL3	102	HSCB	HSC20_HUMAN Iron-sulfur cluster co-chaperone protein HscB OS=Homo sapiens OX=9606 GN=HSCB PE=1 SV=3			1.42		||NA|	1.42	NA	#VALUE!
P62333	323	PSMC6	PRS10_HUMAN 26S proteasome regulatory subunit 10B OS=Homo sapiens OX=9606 GN=PSMC6 PE=1 SV=1	1	0.955	1.63	2.09	1.34304|0.67433|5.73406|1.56978	1.41875	0.54333	38.2964
Q92973	405	TNPO1	TNPO1_HUMAN Transportin-1 OS=Homo sapiens OX=9606 GN=TNPO1 PE=1 SV=2				1.41	|||0.0	1.41	NA	#VALUE!
Q9NTJ3	216	SMC4	SMC4_HUMAN Structural maintenance of chromosomes protein 4 OS=Homo sapiens OX=9606 GN=SMC4 PE=1 SV=2	1.1	0.94	2.18		NA|NA|0.0|	1.40667	0.67449	47.9494
Q92804	159	TAF15	RBP56_HUMAN TATA-binding protein-associated factor 2N OS=Homo sapiens OX=9606 GN=TAF15 PE=1 SV=1		0.67	1.72	1.81	|NA|NA|NA	1.4	0.6338	45.2714
Q99615	127	DNAJC7	DNJC7_HUMAN DnaJ homolog subfamily C member 7 OS=Homo sapiens OX=9606 GN=DNAJC7 PE=1 SV=2	1.39				NA|||	1.39	NA	#VALUE!
P14625	517	HSP90B1	ENPL_HUMAN Endoplasmin OS=Homo sapiens OX=9606 GN=HSP90B1 PE=1 SV=1			1.39		||NA|	1.39	NA	#VALUE!
Q7KZF4	475	SND1	SND1_HUMAN Staphylococcal nuclease domain-containing protein 1 OS=Homo sapiens OX=9606 GN=SND1 PE=1 SV=1				1.39	|||NA	1.39	NA	#VALUE!
Q8IZ83	555	ALDH16A1	A16A1_HUMAN Aldehyde dehydrogenase family 16 member A1 OS=Homo sapiens OX=9606 GN=ALDH16A1 PE=1 SV=2				1.38	|||NA	1.38	NA	#VALUE!
O60841	706	EIF5B	IF2P_HUMAN Eukaryotic translation initiation factor 5B OS=Homo sapiens OX=9606 GN=EIF5B PE=1 SV=4				1.38	|||NA	1.38	NA	#VALUE!
P47897	640	QARS1	SYQ_HUMAN Glutamine--tRNA ligase OS=Homo sapiens OX=9606 GN=QARS1 PE=1 SV=1	0.95	2.11		1.07	NA|NA||0.0	1.37667	0.63791	46.3372
A1L0T0	53	ILVBL	HACL2_HUMAN 2-hydroxyacyl-CoA lyase 2 OS=Homo sapiens OX=9606 GN=ILVBL PE=1 SV=2				1.37	|||NA	1.37	NA	#VALUE!
P05198	114	EIF2S1	IF2A_HUMAN Eukaryotic translation initiation factor 2 subunit 1 OS=Homo sapiens OX=9606 GN=EIF2S1 PE=1 SV=3	1.36				NA|||	1.36	NA	#VALUE!
Q92538	1575	GBF1	GBF1_HUMAN Golgi-specific brefeldin A-resistance guanine nucleotide exchange factor 1 OS=Homo sapiens OX=9606 GN=GBF1 PE=1 SV=2				1.36	|||NA	1.36	NA	#VALUE!
Q9BPU6	191	DPYSL5	DPYL5_HUMAN Dihydropyrimidinase-related protein 5 OS=Homo sapiens OX=9606 GN=DPYSL5 PE=1 SV=1	1.61		1.105		NA||0.47376|	1.3575	0.35709	26.305
P09543	216	CNP	CN37_HUMAN 2',3'-cyclic-nucleotide 3'-phosphodiesterase OS=Homo sapiens OX=9606 GN=CNP PE=1 SV=2	1.63	1.08			NA|NA||	1.355	0.38891	28.7018
O75330	434	HMMR	HMMR_HUMAN Hyaluronan mediated motility receptor OS=Homo sapiens OX=9606 GN=HMMR PE=1 SV=2	1.33		1.37		NA||NA|	1.35	0.02828	2.09481
P62280	94	RPS11	RS11_HUMAN 40S ribosomal protein S11 OS=Homo sapiens OX=9606 GN=RPS11 PE=1 SV=3	1.1		1.6		0.16971||NA|	1.35	0.35355	26.1889
Q13813	1942	SPTAN1	SPTN1_HUMAN Spectrin alpha chain, non-erythrocytic 1 OS=Homo sapiens OX=9606 GN=SPTAN1 PE=1 SV=3		0.57	1.73	1.75	|NA|NA|0.05196	1.35	0.67557	50.0422
Q16891	456	IMMT	MIC60_HUMAN MICOS complex subunit MIC60 OS=Homo sapiens OX=9606 GN=IMMT PE=1 SV=1				1.35	|||NA	1.35	NA	#VALUE!
O60264	656	SMARCA5	SMCA5_HUMAN SWI/SNF-related matrix-associated actin-dependent regulator of chromatin subfamily A member 5 OS=Homo sapiens OX=9606 GN=SMARCA5 PE=1 SV=1				1.35	|||NA	1.35	NA	#VALUE!
Q9Y2S7	161	POLDIP2	PDIP2_HUMAN Polymerase delta-interacting protein 2 OS=Homo sapiens OX=9606 GN=POLDIP2 PE=1 SV=1	1.63	1.06			NA|NA||	1.345	0.40305	29.9665
P08133	392	ANXA6	ANXA6_HUMAN Annexin A6 OS=Homo sapiens OX=9606 GN=ANXA6 PE=1 SV=3	1.8		0.89		NA||0.0|	1.345	0.64347	47.8416
O75131	403	CPNE3	CPNE3_HUMAN Copine-3 OS=Homo sapiens OX=9606 GN=CPNE3 PE=1 SV=1	1.34				NA|||	1.34	NA	#VALUE!
Q9NYF8	428	BCLAF1	BCLF1_HUMAN Bcl-2-associated transcription factor 1 OS=Homo sapiens OX=9606 GN=BCLAF1 PE=1 SV=2		1.34			|NA||	1.34	NA	#VALUE!
Q15019	206	SEPTIN2	SEPT2_HUMAN Septin-2 OS=Homo sapiens OX=9606 GN=SEPTIN2 PE=1 SV=1	1.08	1.66	1.61	0.98	NA|NA|NA|0.24664	1.3325	0.35227	26.4368
P08621	230	SNRNP70	RU17_HUMAN U1 small nuclear ribonucleoprotein 70 kDa OS=Homo sapiens OX=9606 GN=SNRNP70 PE=1 SV=2	1.33				NA|||	1.33	NA	#VALUE!
O95340	225	PAPSS2	PAPS2_HUMAN Bifunctional 3'-phosphoadenosine 5'-phosphosulfate synthase 2 OS=Homo sapiens OX=9606 GN=PAPSS2 PE=1 SV=2	1.33				NA|||	1.33	NA	#VALUE!
P16152	265	CBR1	CBR1_HUMAN Carbonyl reductase [NADPH] 1 OS=Homo sapiens OX=9606 GN=CBR1 PE=1 SV=3	1.33				NA|||	1.33	NA	#VALUE!
Q7KZF4	191	SND1	SND1_HUMAN Staphylococcal nuclease domain-containing protein 1 OS=Homo sapiens OX=9606 GN=SND1 PE=1 SV=1				1.33	|||NA	1.33	NA	#VALUE!
Q9Y672	98	ALG6	ALG6_HUMAN Dolichyl pyrophosphate Man9GlcNAc2 alpha-1,3-glucosyltransferase OS=Homo sapiens OX=9606 GN=ALG6 PE=1 SV=2				1.33	|||NA	1.33	NA	#VALUE!
Q15369	68	ELOC	ELOC_HUMAN Elongin-C OS=Homo sapiens OX=9606 GN=ELOC PE=1 SV=1		1.89		0.76	|NA||NA	1.325	0.79903	60.3042
Q9NR09	3859	BIRC6	BIRC6_HUMAN Baculoviral IAP repeat-containing protein 6 OS=Homo sapiens OX=9606 GN=BIRC6 PE=1 SV=2		1.58	1.06		|NA|NA|	1.32	0.3677	27.8561
Q9UBU9	93	NXF1	NXF1_HUMAN Nuclear RNA export factor 1 OS=Homo sapiens OX=9606 GN=NXF1 PE=1 SV=1			1.32		||0.0|	1.32	NA	#VALUE!
O43615	366	TIMM44	TIM44_HUMAN Mitochondrial import inner membrane translocase subunit TIM44 OS=Homo sapiens OX=9606 GN=TIMM44 PE=1 SV=2			0.9	1.74	||0.0|NA	1.32	0.59397	44.9977
Q07955	183	SRSF1	SRSF1_HUMAN Serine/arginine-rich splicing factor 1 OS=Homo sapiens OX=9606 GN=SRSF1 PE=1 SV=2	1.29	1.15	0.98	1.835	0.34596|0.39829|0.07024|0.65761	1.31375	0.3699	28.156
Q96HE7	468	ERO1A	ERO1A_HUMAN ERO1-like protein alpha OS=Homo sapiens OX=9606 GN=ERO1A PE=1 SV=2	1.31				NA|||	1.31	NA	#VALUE!
Q96F07	417	CYFIP2	CYFP2_HUMAN Cytoplasmic FMR1-interacting protein 2 OS=Homo sapiens OX=9606 GN=CYFIP2 PE=1 SV=2		1.31			|NA||	1.31	NA	#VALUE!
Q6PI48	544	DARS2	SYDM_HUMAN Aspartate--tRNA ligase, mitochondrial OS=Homo sapiens OX=9606 GN=DARS2 PE=1 SV=1		1.52		1.1	|NA||NA	1.31	0.29698	22.6702
P07197	253	NEFM	NFM_HUMAN Neurofilament medium polypeptide OS=Homo sapiens OX=9606 GN=NEFM PE=1 SV=3		1.31			|NA||	1.31	NA	#VALUE!
Q14320	285	FAM50A	FA50A_HUMAN Protein FAM50A OS=Homo sapiens OX=9606 GN=FAM50A PE=1 SV=2			1.31		||0.0|	1.31	NA	#VALUE!
O75533	692	SF3B1	SF3B1_HUMAN Splicing factor 3B subunit 1 OS=Homo sapiens OX=9606 GN=SF3B1 PE=1 SV=3		1.64	0.97		|NA|NA|	1.305	0.47376	36.3034
Q6L8Q7	379	PDE12	PDE12_HUMAN 2',5'-phosphodiesterase 12 OS=Homo sapiens OX=9606 GN=PDE12 PE=1 SV=2			0.92	1.69	||0.0|NA	1.305	0.54447	41.7218
P07237	25	P4HB	PDIA1_HUMAN Protein disulfide-isomerase OS=Homo sapiens OX=9606 GN=P4HB PE=1 SV=3		1.16	1.03	1.72	|NA|NA|NA	1.30333	0.36665	28.1318
Q6P2Q9	875	PRPF8	PRP8_HUMAN Pre-mRNA-processing-splicing factor 8 OS=Homo sapiens OX=9606 GN=PRPF8 PE=1 SV=2	1.47		1.13		0.14142||NA|	1.3	0.24042	18.4938
P51532	178	SMARCA4	SMCA4_HUMAN Transcription activator BRG1 OS=Homo sapiens OX=9606 GN=SMARCA4 PE=1 SV=2		1.4		1.2	|NA||NA	1.3	0.14142	10.8785
Q13057	416	COASY	COASY_HUMAN Bifunctional coenzyme A synthase OS=Homo sapiens OX=9606 GN=COASY PE=1 SV=4		0.86	1.74		|NA|NA|	1.3	0.62225	47.8654
Q9NPI6	91	DCP1A	DCP1A_HUMAN mRNA-decapping enzyme 1A OS=Homo sapiens OX=9606 GN=DCP1A PE=1 SV=3		1.3			|NA||	1.3	NA	#VALUE!
Q15904	158	ATP6AP1	VAS1_HUMAN V-type proton ATPase subunit S1 OS=Homo sapiens OX=9606 GN=ATP6AP1 PE=1 SV=2			1.3		||NA|	1.3	NA	#VALUE!
P11142	594	HSPA8	HSP7C_HUMAN Heat shock cognate 71 kDa protein OS=Homo sapiens OX=9606 GN=HSPA8 PE=1 SV=1	1.54	1.38	1.13	1.13	NA|0.45368|0.02887|0.23586	1.295	0.20141	15.5529
P63279	20	UBE2I	UBC9_HUMAN SUMO-conjugating enzyme UBC9 OS=Homo sapiens OX=9606 GN=UBE2I PE=1 SV=1	0.83	0.795	0.935	2.61	0.0|0.23335|0.3182|NA	1.2925	0.88035	68.1122
Q9NYF8	294	BCLAF1	BCLF1_HUMAN Bcl-2-associated transcription factor 1 OS=Homo sapiens OX=9606 GN=BCLAF1 PE=1 SV=2			1.155	1.43	||0.71418|0.05657	1.2925	0.19445	15.0445
P18077	24	RPL35A	RL35A_HUMAN 60S ribosomal protein L35a OS=Homo sapiens OX=9606 GN=RPL35A PE=1 SV=2	0.97	1.91	0.99		0.13868|NA|NA|	1.29	0.53703	41.6302
P11766	363	ADH5	ADHX_HUMAN Alcohol dehydrogenase class-3 OS=Homo sapiens OX=9606 GN=ADH5 PE=1 SV=4	1.28			1.3	NA|||0.75088	1.29	0.01414	1.09612
Q9BWF3	41	RBM4	RBM4_HUMAN RNA-binding protein 4 OS=Homo sapiens OX=9606 GN=RBM4 PE=1 SV=1	1.36	1.22			0.0|NA||	1.29	0.09899	7.67364
Q96AC1	96	FERMT2	FERM2_HUMAN Fermitin family homolog 2 OS=Homo sapiens OX=9606 GN=FERMT2 PE=1 SV=1			1.29		||NA|	1.29	NA	#VALUE!
P32322	28	PYCR1	P5CR1_HUMAN Pyrroline-5-carboxylate reductase 1, mitochondrial OS=Homo sapiens OX=9606 GN=PYCR1 PE=1 SV=2				1.29	|||NA	1.29	NA	#VALUE!
Q14738	331	PPP2R5D	2A5D_HUMAN Serine/threonine-protein phosphatase 2A 56 kDa regulatory subunit delta isoform OS=Homo sapiens OX=9606 GN=PPP2R5D PE=1 SV=1				1.29	|||NA	1.29	NA	#VALUE!
Q00341	210	HDLBP	VIGLN_HUMAN Vigilin OS=Homo sapiens OX=9606 GN=HDLBP PE=1 SV=2	1.04		1.64	1.18	NA||NA|NA	1.28667	0.3139	24.3963
Q14166	436	TTLL12	TTL12_HUMAN Tubulin--tyrosine ligase-like protein 12 OS=Homo sapiens OX=9606 GN=TTLL12 PE=1 SV=2	0.91		1.66		NA||NA|	1.285	0.53033	41.2708
Q13155	43	AIMP2	AIMP2_HUMAN Aminoacyl tRNA synthase complex-interacting multifunctional protein 2 OS=Homo sapiens OX=9606 GN=AIMP2 PE=1 SV=2		1.43		1.14	|0.30037||NA	1.285	0.20506	15.958
Q15738	17	NSDHL	NSDHL_HUMAN Sterol-4-alpha-carboxylate 3-dehydrogenase, decarboxylating OS=Homo sapiens OX=9606 GN=NSDHL PE=1 SV=2	1.18			1.38	NA|||NA	1.28	0.14142	11.0484
Q07666	438	KHDRBS1	KHDR1_HUMAN KH domain-containing, RNA-binding, signal transduction-associated protein 1 OS=Homo sapiens OX=9606 GN=KHDRBS1 PE=1 SV=1				1.28	|||NA	1.28	NA	#VALUE!
O75643	1288	SNRNP200	U520_HUMAN U5 small nuclear ribonucleoprotein 200 kDa helicase OS=Homo sapiens OX=9606 GN=SNRNP200 PE=1 SV=2	0.825	1.58	1.9	0.79	0.00707|NA|0.84504|NA	1.27375	0.55419	43.5085
P80303	98	NUCB2	NUCB2_HUMAN Nucleobindin-2 OS=Homo sapiens OX=9606 GN=NUCB2 PE=1 SV=3	1.07		1.59	1.16	0.0||0.15556|0.04619	1.27333	0.27791	21.8254
P06280	115	GLA	AGAL_HUMAN Alpha-galactosidase A OS=Homo sapiens OX=9606 GN=GLA PE=1 SV=1	1.27				NA|||	1.27	NA	#VALUE!
O00541	375	PES1	PESC_HUMAN Pescadillo homolog OS=Homo sapiens OX=9606 GN=PES1 PE=1 SV=1	1.21			1.33	0.22627|||NA	1.27	0.08485	6.6811
Q9HD15	171	SRA1	SRA1_HUMAN Steroid receptor RNA activator 1 OS=Homo sapiens OX=9606 GN=SRA1 PE=1 SV=1	1.41			1.13	NA|||NA	1.27	0.19799	15.5898
Q9Y2L1	441	DIS3	RRP44_HUMAN Exosome complex exonuclease RRP44 OS=Homo sapiens OX=9606 GN=DIS3 PE=1 SV=2	2.02		0.52		NA||NA|	1.27	1.06066	83.5165
P63172	36	DYNLT1	DYLT1_HUMAN Dynein light chain Tctex-type 1 OS=Homo sapiens OX=9606 GN=DYNLT1 PE=1 SV=1		1.61		0.93	|NA||0.05657	1.27	0.48083	37.8606
Q9Y230	240	RUVBL2	RUVB2_HUMAN RuvB-like 2 OS=Homo sapiens OX=9606 GN=RUVBL2 PE=1 SV=3		1.27			|NA||	1.27	NA	#VALUE!
Q9NSE4	536	IARS2	SYIM_HUMAN Isoleucine--tRNA ligase, mitochondrial OS=Homo sapiens OX=9606 GN=IARS2 PE=1 SV=2			1.27		||NA|	1.27	NA	#VALUE!
Q9NQC3	1071	RTN4	RTN4_HUMAN Reticulon-4 OS=Homo sapiens OX=9606 GN=RTN4 PE=1 SV=2				1.27	|||NA	1.27	NA	#VALUE!
Q15424	747	SAFB	SAFB1_HUMAN Scaffold attachment factor B1 OS=Homo sapiens OX=9606 GN=SAFB PE=1 SV=4	0.96			1.56	NA|||NA	1.26	0.42426	33.6714
P12270	2088	TPR	TPR_HUMAN Nucleoprotein TPR OS=Homo sapiens OX=9606 GN=TPR PE=1 SV=3	0.94	1.58			NA|NA||	1.26	0.45255	35.9167
O60884	220	DNAJA2	DNJA2_HUMAN DnaJ homolog subfamily A member 2 OS=Homo sapiens OX=9606 GN=DNAJA2 PE=1 SV=1		1.26			|NA||	1.26	NA	#VALUE!
P49327	2440	FASN	FAS_HUMAN Fatty acid synthase OS=Homo sapiens OX=9606 GN=FASN PE=1 SV=3		1.26			|NA||	1.26	NA	#VALUE!
Q96CS3	34	FAF2	FAF2_HUMAN FAS-associated factor 2 OS=Homo sapiens OX=9606 GN=FAF2 PE=1 SV=2		1.54	0.98		|NA|NA|	1.26	0.39598	31.427
P19784	277	CSNK2A2	CSK22_HUMAN Casein kinase II subunit alpha' OS=Homo sapiens OX=9606 GN=CSNK2A2 PE=1 SV=1			1.26		||NA|	1.26	NA	#VALUE!
O15144	231	ARPC2	ARPC2_HUMAN Actin-related protein 2/3 complex subunit 2 OS=Homo sapiens OX=9606 GN=ARPC2 PE=1 SV=1	1.29			1.22	NA|||NA	1.255	0.0495	3.94422
Q16643	146	DBN1	DREB_HUMAN Drebrin OS=Homo sapiens OX=9606 GN=DBN1 PE=1 SV=4	1.04		1.47		NA||NA|	1.255	0.30406	24.2279
Q9BW92	437	TARS2	SYTM_HUMAN Threonine--tRNA ligase, mitochondrial OS=Homo sapiens OX=9606 GN=TARS2 PE=1 SV=1	1.01		1.5		0.02828||NA|	1.255	0.34648	27.608
P17844	372	DDX5	DDX5_HUMAN Probable ATP-dependent RNA helicase DDX5 OS=Homo sapiens OX=9606 GN=DDX5 PE=1 SV=1	1.36			1.15	NA|||NA	1.255	0.14849	11.8319
Q14204	75	DYNC1H1	DYHC1_HUMAN Cytoplasmic dynein 1 heavy chain 1 OS=Homo sapiens OX=9606 GN=DYNC1H1 PE=1 SV=5	1.49	1.04	1.23		NA|0.09238|0.23527|	1.25333	0.22591	18.0248
P54136	438	RARS1	SYRC_HUMAN Arginine--tRNA ligase, cytoplasmic OS=Homo sapiens OX=9606 GN=RARS1 PE=1 SV=2	1.19	1.315			NA|0.74246||	1.2525	0.08839	7.05709
O15067	131	PFAS	PUR4_HUMAN Phosphoribosylformylglycinamidine synthase OS=Homo sapiens OX=9606 GN=PFAS PE=1 SV=4		1.23	1.69	0.835	|0.42426|NA|0.09192	1.25167	0.42791	34.1871
Q14203	1273	DCTN1	DCTN1_HUMAN Dynactin subunit 1 OS=Homo sapiens OX=9606 GN=DCTN1 PE=1 SV=3	1.25				NA|||	1.25	NA	#VALUE!
P06730	37	EIF4E	IF4E_HUMAN Eukaryotic translation initiation factor 4E OS=Homo sapiens OX=9606 GN=EIF4E PE=1 SV=2		1.49		1.01	|NA||NA	1.25	0.33941	27.1528
O75306	88	NDUFS2	NDUS2_HUMAN NADH dehydrogenase [ubiquinone] iron-sulfur protein 2, mitochondrial OS=Homo sapiens OX=9606 GN=NDUFS2 PE=1 SV=2		1.25			|NA||	1.25	NA	#VALUE!
Q14157	415	UBAP2L	UBP2L_HUMAN Ubiquitin-associated protein 2-like OS=Homo sapiens OX=9606 GN=UBAP2L PE=1 SV=2			1.25		||0.14142|	1.25	NA	#VALUE!
P61106	101	RAB14	RAB14_HUMAN Ras-related protein Rab-14 OS=Homo sapiens OX=9606 GN=RAB14 PE=1 SV=4			1.25		||NA|	1.25	NA	#VALUE!
Q12979	251	ABR	ABR_HUMAN Active breakpoint cluster region-related protein OS=Homo sapiens OX=9606 GN=ABR PE=1 SV=2			1.25		||NA|	1.25	NA	#VALUE!
P78527	3070	PRKDC	PRKDC_HUMAN DNA-dependent protein kinase catalytic subunit OS=Homo sapiens OX=9606 GN=PRKDC PE=1 SV=3				1.25	|||NA	1.25	NA	#VALUE!
P11172	362	UMPS	UMPS_HUMAN Uridine 5'-monophosphate synthase OS=Homo sapiens OX=9606 GN=UMPS PE=1 SV=1	1.24				NA|||	1.24	NA	#VALUE!
Q8WTT2	710	NOC3L	NOC3L_HUMAN Nucleolar complex protein 3 homolog OS=Homo sapiens OX=9606 GN=NOC3L PE=1 SV=1		1.24			|NA||	1.24	NA	#VALUE!
Q99832	258	CCT7	TCPH_HUMAN T-complex protein 1 subunit eta OS=Homo sapiens OX=9606 GN=CCT7 PE=1 SV=2			1.24		||NA|	1.24	NA	#VALUE!
Q99459	39	CDC5L	CDC5L_HUMAN Cell division cycle 5-like protein OS=Homo sapiens OX=9606 GN=CDC5L PE=1 SV=2				1.24	|||NA	1.24	NA	#VALUE!
Q9UBF8	361	PI4KB	PI4KB_HUMAN Phosphatidylinositol 4-kinase beta OS=Homo sapiens OX=9606 GN=PI4KB PE=1 SV=1				1.24	|||NA	1.24	NA	#VALUE!
P07437	28	TUBB	TBB5_HUMAN Tubulin beta chain OS=Homo sapiens OX=9606 GN=TUBB PE=1 SV=2	1.36	1.45	1.045	1.09	0.11015|0.39228|0.14345|0.34793	1.23625	0.19914	16.1084
Q02878	227	RPL6	RL6_HUMAN 60S ribosomal protein L6 OS=Homo sapiens OX=9606 GN=RPL6 PE=1 SV=3	1.43	1.575	0.87	1.065	0.28537|0.20506|0.02|0.1082	1.235	0.32442	26.2688
P78527	693	PRKDC	PRKDC_HUMAN DNA-dependent protein kinase catalytic subunit OS=Homo sapiens OX=9606 GN=PRKDC PE=1 SV=3		1.71		0.76	|0.09238||NA	1.235	0.67175	54.3927
Q9BSH4	158	TACO1	TACO1_HUMAN Translational activator of cytochrome c oxidase 1 OS=Homo sapiens OX=9606 GN=TACO1 PE=1 SV=1		1.235			|0.53033||	1.235	NA	#VALUE!
P31948	521	STIP1	STIP1_HUMAN Stress-induced-phosphoprotein 1 OS=Homo sapiens OX=9606 GN=STIP1 PE=1 SV=1	0.8	1.905		0.99	NA|0.40305||0.28284	1.23167	0.59081	47.9682
O00231	148	PSMD11	PSD11_HUMAN 26S proteasome non-ATPase regulatory subunit 11 OS=Homo sapiens OX=9606 GN=PSMD11 PE=1 SV=3	1.06		1.69	0.945	NA||NA|0.03536	1.23167	0.40107	32.5631
P48643	129	CCT5	TCPE_HUMAN T-complex protein 1 subunit epsilon OS=Homo sapiens OX=9606 GN=CCT5 PE=1 SV=1	1.23				NA|||	1.23	NA	#VALUE!
Q9Y4L1	123	HYOU1	HYOU1_HUMAN Hypoxia up-regulated protein 1 OS=Homo sapiens OX=9606 GN=HYOU1 PE=1 SV=1	1.14	1.34	1.21		0.0|0.38184|0.0|	1.23	0.10149	8.25122
Q6UWP7	271	LCLAT1	LCLT1_HUMAN Lysocardiolipin acyltransferase 1 OS=Homo sapiens OX=9606 GN=LCLAT1 PE=1 SV=1	1.23				0.42426|||	1.23	NA	#VALUE!
Q7Z2Z2	682	EFL1	EFL1_HUMAN Elongation factor-like GTPase 1 OS=Homo sapiens OX=9606 GN=EFL1 PE=1 SV=2	1.23				NA|||	1.23	NA	#VALUE!
Q9H9B4	52	SFXN1	SFXN1_HUMAN Sideroflexin-1 OS=Homo sapiens OX=9606 GN=SFXN1 PE=1 SV=4		1.16		1.3	|0.04619||0.30271	1.23	0.09899	8.04797
P39656	415	DDOST	OST48_HUMAN Dolichyl-diphosphooligosaccharide--protein glycosyltransferase 48 kDa subunit OS=Homo sapiens OX=9606 GN=DDOST PE=1 SV=4		1.22	0.81	1.66	|NA|NA|NA	1.23	0.42509	34.5602
O60502	282	OGA	OGA_HUMAN Protein O-GlcNAcase OS=Homo sapiens OX=9606 GN=OGA PE=1 SV=2		1.23			|NA||	1.23	NA	#VALUE!
P46736	221	BRCC3	BRCC3_HUMAN Lys-63-specific deubiquitinase BRCC36 OS=Homo sapiens OX=9606 GN=BRCC3 PE=1 SV=2		1.23			|NA||	1.23	NA	#VALUE!
P51809	116	VAMP7	VAMP7_HUMAN Vesicle-associated membrane protein 7 OS=Homo sapiens OX=9606 GN=VAMP7 PE=1 SV=3			1.23		||NA|	1.23	NA	#VALUE!
Q15417	135	CNN3	CNN3_HUMAN Calponin-3 OS=Homo sapiens OX=9606 GN=CNN3 PE=1 SV=1			1.23		||NA|	1.23	NA	#VALUE!
Q13561	108	DCTN2	DCTN2_HUMAN Dynactin subunit 2 OS=Homo sapiens OX=9606 GN=DCTN2 PE=1 SV=4			1.23		||NA|	1.23	NA	#VALUE!
Q92621	46	NUP205	NU205_HUMAN Nuclear pore complex protein Nup205 OS=Homo sapiens OX=9606 GN=NUP205 PE=1 SV=3				1.23	|||0.0	1.23	NA	#VALUE!
Q66K74	292	MAP1S	MAP1S_HUMAN Microtubule-associated protein 1S OS=Homo sapiens OX=9606 GN=MAP1S PE=1 SV=2				1.23	|||NA	1.23	NA	#VALUE!
P35580	1201	MYH10	MYH10_HUMAN Myosin-10 OS=Homo sapiens OX=9606 GN=MYH10 PE=1 SV=3	1.325	1.73	0.935	0.92	0.24749|0.16971|0.075|0.11533	1.2275	0.38389	31.2741
P00558	125	PGK1	PGK1_HUMAN Phosphoglycerate kinase 1 OS=Homo sapiens OX=9606 GN=PGK1 PE=1 SV=3	1.41		1.04		0.09039||0.07071|	1.225	0.26163	21.3576
Q8N684	443	CPSF7	CPSF7_HUMAN Cleavage and polyadenylation specificity factor subunit 7 OS=Homo sapiens OX=9606 GN=CPSF7 PE=1 SV=1			1.225		||0.12021|	1.225	NA	#VALUE!
Q969V3	372	NCLN	NCLN_HUMAN Nicalin OS=Homo sapiens OX=9606 GN=NCLN PE=1 SV=2		1.31	1.37	0.99	|NA|NA|NA	1.22333	0.20429	16.6995
P53618	314	COPB1	COPB_HUMAN Coatomer subunit beta OS=Homo sapiens OX=9606 GN=COPB1 PE=1 SV=3	1		1.44		NA||NA|	1.22	0.31113	25.5025
P31153	379	MAT2A	METK2_HUMAN S-adenosylmethionine synthase isoform type-2 OS=Homo sapiens OX=9606 GN=MAT2A PE=1 SV=1	1.58		1.02	1.06	0.41012||NA|0.46004	1.22	0.31241	25.6074
Q8IYB5	17	SMAP1	SMAP1_HUMAN Stromal membrane-associated protein 1 OS=Homo sapiens OX=9606 GN=SMAP1 PE=1 SV=2	1.22				NA|||	1.22	NA	#VALUE!
P08865	131	RPSA	RSSA_HUMAN 40S ribosomal protein SA OS=Homo sapiens OX=9606 GN=RPSA PE=1 SV=4	1.27			1.17	0.13577|||NA	1.22	0.07071	5.7959
O43592	160	XPOT	XPOT_HUMAN Exportin-T OS=Homo sapiens OX=9606 GN=XPOT PE=1 SV=2		1.44	1		|NA|0.0|	1.22	0.31113	25.5025
O15372	228	EIF3H	EIF3H_HUMAN Eukaryotic translation initiation factor 3 subunit H OS=Homo sapiens OX=9606 GN=EIF3H PE=1 SV=1		1.53		0.91	|NA||NA	1.22	0.43841	35.9352
Q14739	146	LBR	LBR_HUMAN Delta(14)-sterol reductase LBR OS=Homo sapiens OX=9606 GN=LBR PE=1 SV=2			1.22		||0.05196|	1.22	NA	#VALUE!
O43719	212	HTATSF1	HTSF1_HUMAN HIV Tat-specific factor 1 OS=Homo sapiens OX=9606 GN=HTATSF1 PE=1 SV=1			1.22		||NA|	1.22	NA	#VALUE!
P30419	350	NMT1	NMT1_HUMAN Glycylpeptide N-tetradecanoyltransferase 1 OS=Homo sapiens OX=9606 GN=NMT1 PE=1 SV=2			1.22		||0.05657|	1.22	NA	#VALUE!
P19623	284	SRM	SPEE_HUMAN Spermidine synthase OS=Homo sapiens OX=9606 GN=SRM PE=1 SV=1				1.22	|||0.0	1.22	NA	#VALUE!
P16989	255	YBX3	YBOX3_HUMAN Y-box-binding protein 3 OS=Homo sapiens OX=9606 GN=YBX3 PE=1 SV=4				1.22	|||NA	1.22	NA	#VALUE!
P31948	101	STIP1	STIP1_HUMAN Stress-induced-phosphoprotein 1 OS=Homo sapiens OX=9606 GN=STIP1 PE=1 SV=1				1.22	|||NA	1.22	NA	#VALUE!
Q9BY32	101	ITPA	ITPA_HUMAN Inosine triphosphate pyrophosphatase OS=Homo sapiens OX=9606 GN=ITPA PE=1 SV=2				1.22	|||NA	1.22	NA	#VALUE!
P30086	23	PEBP1	PEBP1_HUMAN Phosphatidylethanolamine-binding protein 1 OS=Homo sapiens OX=9606 GN=PEBP1 PE=1 SV=3	1.53		0.9		NA||NA|	1.215	0.44548	36.665
Q13263	341	TRIM28	TIF1B_HUMAN Transcription intermediary factor 1-beta OS=Homo sapiens OX=9606 GN=TRIM28 PE=1 SV=5		1.26		1.17	|NA||NA	1.215	0.06364	5.23786
P49327	971	FASN	FAS_HUMAN Fatty acid synthase OS=Homo sapiens OX=9606 GN=FASN PE=1 SV=3		1.25	1.18		|NA|NA|	1.215	0.0495	4.07407
P35613	371	BSG	BASI_HUMAN Basigin OS=Homo sapiens OX=9606 GN=BSG PE=1 SV=2	0.98	1.2	1.235	1.43	0.14142|0.33941|0.4879|NA	1.21125	0.18441	15.2248
O75694	952	NUP155	NU155_HUMAN Nuclear pore complex protein Nup155 OS=Homo sapiens OX=9606 GN=NUP155 PE=1 SV=1	1.35	1.64	0.91	0.945	0.0|0.08718|NA|0.16263	1.21125	0.34867	28.786
Q86XP3	840	DDX42	DDX42_HUMAN ATP-dependent RNA helicase DDX42 OS=Homo sapiens OX=9606 GN=DDX42 PE=1 SV=1		1.21			|NA||	1.21	NA	#VALUE!
P49642	263	PRIM1	PRI1_HUMAN DNA primase small subunit OS=Homo sapiens OX=9606 GN=PRIM1 PE=1 SV=1				1.21	|||NA	1.21	NA	#VALUE!
Q7Z2W4	124	ZC3HAV1	ZCCHV_HUMAN Zinc finger CCCH-type antiviral protein 1 OS=Homo sapiens OX=9606 GN=ZC3HAV1 PE=1 SV=3				1.21	|||NA	1.21	NA	#VALUE!
P61962	67	DCAF7	DCAF7_HUMAN DDB1- and CUL4-associated factor 7 OS=Homo sapiens OX=9606 GN=DCAF7 PE=1 SV=1				1.21	|||NA	1.21	NA	#VALUE!
Q15631	169	TSN	TSN_HUMAN Translin OS=Homo sapiens OX=9606 GN=TSN PE=1 SV=1				1.21	|||NA	1.21	NA	#VALUE!
Q03252	267	LMNB2	LMNB2_HUMAN Lamin-B2 OS=Homo sapiens OX=9606 GN=LMNB2 PE=1 SV=4	1.5	1.48	1	0.85	0.11581|0.05196|0.28478|0.08425	1.2075	0.332	27.4948
P33992	95	MCM5	MCM5_HUMAN DNA replication licensing factor MCM5 OS=Homo sapiens OX=9606 GN=MCM5 PE=1 SV=5	1.56	1.1		0.96	NA|0.15011||0.0	1.20667	0.3139	26.0137
Q8N8S7	39	ENAH	ENAH_HUMAN Protein enabled homolog OS=Homo sapiens OX=9606 GN=ENAH PE=1 SV=2		1.36		1.05	|NA||NA	1.205	0.2192	18.1909
Q12931	311	TRAP1	TRAP1_HUMAN Heat shock protein 75 kDa, mitochondrial OS=Homo sapiens OX=9606 GN=TRAP1 PE=1 SV=3		1.41		1	|NA||NA	1.205	0.28991	24.0589
P46781	124	RPS9	RS9_HUMAN 40S ribosomal protein S9 OS=Homo sapiens OX=9606 GN=RPS9 PE=1 SV=3	1.14	1.38		1.08	NA|NA||NA	1.2	0.15875	13.2292
Q13617	68	CUL2	CUL2_HUMAN Cullin-2 OS=Homo sapiens OX=9606 GN=CUL2 PE=1 SV=2	1.2				NA|||	1.2	NA	#VALUE!
O15144	254	ARPC2	ARPC2_HUMAN Actin-related protein 2/3 complex subunit 2 OS=Homo sapiens OX=9606 GN=ARPC2 PE=1 SV=1			1.2		||NA|	1.2	NA	#VALUE!
P43243	241	MATR3	MATR3_HUMAN Matrin-3 OS=Homo sapiens OX=9606 GN=MATR3 PE=1 SV=2			1.2		||0.24826|	1.2	NA	#VALUE!
Q9H7D7	506	WDR26	WDR26_HUMAN WD repeat-containing protein 26 OS=Homo sapiens OX=9606 GN=WDR26 PE=1 SV=3				1.2	|||NA	1.2	NA	#VALUE!
P30533	243	LRPAP1	AMRP_HUMAN Alpha-2-macroglobulin receptor-associated protein OS=Homo sapiens OX=9606 GN=LRPAP1 PE=1 SV=1				1.2	|||NA	1.2	NA	#VALUE!
Q15417	26	CNN3	CNN3_HUMAN Calponin-3 OS=Homo sapiens OX=9606 GN=CNN3 PE=1 SV=1			1.345	1.05	||0.23335|0.0	1.1975	0.2086	17.4196
Q15046	85	KARS1	SYK_HUMAN Lysine--tRNA ligase OS=Homo sapiens OX=9606 GN=KARS1 PE=1 SV=3	1.17	0.98		1.44	NA|NA||NA	1.19667	0.23116	19.3169
O43252	346	PAPSS1	PAPS1_HUMAN Bifunctional 3'-phosphoadenosine 5'-phosphosulfate synthase 1 OS=Homo sapiens OX=9606 GN=PAPSS1 PE=1 SV=2	1.03			1.36	NA|||NA	1.195	0.23335	19.5272
P50454	262	SERPINH1	SERPH_HUMAN Serpin H1 OS=Homo sapiens OX=9606 GN=SERPINH1 PE=1 SV=2	1.29			1.1	NA|||NA	1.195	0.13435	11.2427
Q7Z6Z7	2614	HUWE1	HUWE1_HUMAN E3 ubiquitin-protein ligase HUWE1 OS=Homo sapiens OX=9606 GN=HUWE1 PE=1 SV=3	0.9			1.485	0.33941|||0.50205	1.1925	0.41366	34.6885
Q96FW1	192	OTUB1	OTUB1_HUMAN Ubiquitin thioesterase OTUB1 OS=Homo sapiens OX=9606 GN=OTUB1 PE=1 SV=2	1.72	1.03	0.99	1.03	0.0|0.0|0.09074|0.14799	1.1925	0.35217	29.5321
O00410	716	IPO5	IPO5_HUMAN Importin-5 OS=Homo sapiens OX=9606 GN=IPO5 PE=1 SV=4	1.36		1.02		NA||NA|	1.19	0.24042	20.2034
P27824	201	CANX	CALX_HUMAN Calnexin OS=Homo sapiens OX=9606 GN=CANX PE=1 SV=2	1.19				0.0|||	1.19	NA	#VALUE!
P10644	25	PRKAR1A	KAP0_HUMAN cAMP-dependent protein kinase type I-alpha regulatory subunit OS=Homo sapiens OX=9606 GN=PRKAR1A PE=1 SV=1			1.19		||NA|	1.19	NA	#VALUE!
Q9Y266	62	NUDC	NUDC_HUMAN Nuclear migration protein nudC OS=Homo sapiens OX=9606 GN=NUDC PE=1 SV=1				1.19	|||NA	1.19	NA	#VALUE!
O76094	446	SRP72	SRP72_HUMAN Signal recognition particle subunit SRP72 OS=Homo sapiens OX=9606 GN=SRP72 PE=1 SV=3				1.19	|||NA	1.19	NA	#VALUE!
Q6PI48	394	DARS2	SYDM_HUMAN Aspartate--tRNA ligase, mitochondrial OS=Homo sapiens OX=9606 GN=DARS2 PE=1 SV=1	0.97	1.69	0.905		0.09815|NA|0.07506|	1.18833	0.43567	36.6624
P31689	248	DNAJA1	DNJA1_HUMAN DnaJ homolog subfamily A member 1 OS=Homo sapiens OX=9606 GN=DNAJA1 PE=1 SV=2	1.185	1.245	1.19	1.13	0.30406|0.19092|NA|NA	1.1875	0.04699	3.95705
P46459	34	NSF	NSF_HUMAN Vesicle-fusing ATPase OS=Homo sapiens OX=9606 GN=NSF PE=1 SV=3		0.87	0.995	1.69	|NA|0.06364|NA	1.185	0.44179	37.2819
O95197	1003	RTN3	RTN3_HUMAN Reticulon-3 OS=Homo sapiens OX=9606 GN=RTN3 PE=1 SV=2			1.4	0.97	||0.0|NA	1.185	0.30406	25.6591
Q8WUM4	633	PDCD6IP	PDC6I_HUMAN Programmed cell death 6-interacting protein OS=Homo sapiens OX=9606 GN=PDCD6IP PE=1 SV=1		1.04	1.33	1.18	|0.0|NA|NA	1.18333	0.14503	12.2561
P82675	369	MRPS5	RT05_HUMAN 28S ribosomal protein S5, mitochondrial OS=Homo sapiens OX=9606 GN=MRPS5 PE=1 SV=2	1.01	1.04	1.625	1.05	0.15556|0.02309|0.60104|NA	1.18125	0.29632	25.0853
Q9NX58	162	LYAR	LYAR_HUMAN Cell growth-regulating nucleolar protein OS=Homo sapiens OX=9606 GN=LYAR PE=1 SV=2	1.38	0.98			NA|NA||	1.18	0.28284	23.9695
Q9H6Z4	506	RANBP3	RANB3_HUMAN Ran-binding protein 3 OS=Homo sapiens OX=9606 GN=RANBP3 PE=1 SV=1	1.18				NA|||	1.18	NA	#VALUE!
O75496	57	GMNN	GEMI_HUMAN Geminin OS=Homo sapiens OX=9606 GN=GMNN PE=1 SV=1	1.16			1.2	0.0|||0.0	1.18	0.02828	2.39661
Q9UQ80	147	PA2G4	PA2G4_HUMAN Proliferation-associated protein 2G4 OS=Homo sapiens OX=9606 GN=PA2G4 PE=1 SV=3	1.18				0.0|||	1.18	NA	#VALUE!
P28331	460	NDUFS1	NDUS1_HUMAN NADH-ubiquinone oxidoreductase 75 kDa subunit, mitochondrial OS=Homo sapiens OX=9606 GN=NDUFS1 PE=1 SV=3	1.18				0.0|||	1.18	NA	#VALUE!
P22695	227	UQCRC2	QCR2_HUMAN Cytochrome b-c1 complex subunit 2, mitochondrial OS=Homo sapiens OX=9606 GN=UQCRC2 PE=1 SV=3	1.24		1.12		0.0||NA|	1.18	0.08485	7.19068
O43488	269	AKR7A2	ARK72_HUMAN Aflatoxin B1 aldehyde reductase member 2 OS=Homo sapiens OX=9606 GN=AKR7A2 PE=1 SV=3		1.24		1.12	|NA||0.23671	1.18	0.08485	7.19068
O14654	1190	IRS4	IRS4_HUMAN Insulin receptor substrate 4 OS=Homo sapiens OX=9606 GN=IRS4 PE=1 SV=1			1.18		||NA|	1.18	NA	#VALUE!
P45954	245	ACADSB	ACDSB_HUMAN Short/branched chain specific acyl-CoA dehydrogenase, mitochondrial OS=Homo sapiens OX=9606 GN=ACADSB PE=1 SV=1			1.18		||NA|	1.18	NA	#VALUE!
P41743	391	PRKCI	KPCI_HUMAN Protein kinase C iota type OS=Homo sapiens OX=9606 GN=PRKCI PE=1 SV=2			1.18		||NA|	1.18	NA	#VALUE!
O00487	194	PSMD14	PSDE_HUMAN 26S proteasome non-ATPase regulatory subunit 14 OS=Homo sapiens OX=9606 GN=PSMD14 PE=1 SV=1			1.18		||NA|	1.18	NA	#VALUE!
Q14204	1810	DYNC1H1	DYHC1_HUMAN Cytoplasmic dynein 1 heavy chain 1 OS=Homo sapiens OX=9606 GN=DYNC1H1 PE=1 SV=5				1.18	|||NA	1.18	NA	#VALUE!
Q96EY7	232	PTCD3	PTCD3_HUMAN Pentatricopeptide repeat domain-containing protein 3, mitochondrial OS=Homo sapiens OX=9606 GN=PTCD3 PE=1 SV=3				1.18	|||0.11314	1.18	NA	#VALUE!
Q99460	931	PSMD1	PSMD1_HUMAN 26S proteasome non-ATPase regulatory subunit 1 OS=Homo sapiens OX=9606 GN=PSMD1 PE=1 SV=2				1.18	|||0.2829	1.18	NA	#VALUE!
P49327	2408	FASN	FAS_HUMAN Fatty acid synthase OS=Homo sapiens OX=9606 GN=FASN PE=1 SV=3	1.3		1.32	0.91	NA||NA|0.0	1.17667	0.23116	19.6453
O15260	27	SURF4	SURF4_HUMAN Surfeit locus protein 4 OS=Homo sapiens OX=9606 GN=SURF4 PE=1 SV=3	0.88		1.47		NA||NA|	1.175	0.41719	35.5055
P07237	231	P4HB	PDIA1_HUMAN Protein disulfide-isomerase OS=Homo sapiens OX=9606 GN=P4HB PE=1 SV=3	1.15	1	1.22	1.33	1.87778|0.19348|0.26462|0.60811	1.175	0.1382	11.7617
P04844	170	RPN2	RPN2_HUMAN Dolichyl-diphosphooligosaccharide--protein glycosyltransferase subunit 2 OS=Homo sapiens OX=9606 GN=RPN2 PE=1 SV=3	1.55	1.11	1.09	0.94	NA|NA|NA|0.17078	1.1725	0.26285	22.4179
P42704	1096	LRPPRC	LPPRC_HUMAN Leucine-rich PPR motif-containing protein, mitochondrial OS=Homo sapiens OX=9606 GN=LRPPRC PE=1 SV=3	0.99	1.555		0.97	NA|0.37477||NA	1.17167	0.33213	28.3467
Q8NBF2	245	NHLRC2	NHLC2_HUMAN NHL repeat-containing protein 2 OS=Homo sapiens OX=9606 GN=NHLRC2 PE=1 SV=1	1.17				NA|||	1.17	NA	#VALUE!
P30041	39	PRDX6	PRDX6_HUMAN Peroxiredoxin-6 OS=Homo sapiens OX=9606 GN=PRDX6 PE=1 SV=3	1.17		1.17		0.0||0.15758|	1.17	0	0
Q01130	99	SRSF2	SRSF2_HUMAN Serine/arginine-rich splicing factor 2 OS=Homo sapiens OX=9606 GN=SRSF2 PE=1 SV=4		0.26	2.08		|NA|NA|	1.17	1.28693	109.994
P49593	200	PPM1F	PPM1F_HUMAN Protein phosphatase 1F OS=Homo sapiens OX=9606 GN=PPM1F PE=1 SV=3			1.32	1.02	||NA|0.21071	1.17	0.21213	18.1308
Q9BV79	50	MECR	MECR_HUMAN Enoyl-[acyl-carrier-protein] reductase, mitochondrial OS=Homo sapiens OX=9606 GN=MECR PE=1 SV=2				1.17	|||NA	1.17	NA	#VALUE!
Q9H2U2	218	PPA2	IPYR2_HUMAN Inorganic pyrophosphatase 2, mitochondrial OS=Homo sapiens OX=9606 GN=PPA2 PE=1 SV=2				1.17	|||NA	1.17	NA	#VALUE!
Q92616	602	GCN1	GCN1_HUMAN eIF-2-alpha kinase activator GCN1 OS=Homo sapiens OX=9606 GN=GCN1 PE=1 SV=6				1.17	|||NA	1.17	NA	#VALUE!
P30101	186	PDIA3	PDIA3_HUMAN Protein disulfide-isomerase A3 OS=Homo sapiens OX=9606 GN=PDIA3 PE=1 SV=4	1.38	1.34	1	0.95	0.16623|NA|0.0|0.0	1.1675	0.22381	19.17
Q9NUQ9	69	CYRIB	CYRIB_HUMAN CYFIP-related Rac1 interactor B OS=Homo sapiens OX=9606 GN=CYRIB PE=1 SV=1	1.17	1.27	1.06		0.15556|NA|0.0|	1.16667	0.10504	9.0034
Q8WWY3	309	PRPF31	PRP31_HUMAN U4/U6 small nuclear ribonucleoprotein Prp31 OS=Homo sapiens OX=9606 GN=PRPF31 PE=1 SV=2	1.12		1.03	1.35	NA||NA|NA	1.16667	0.16503	14.1454
P22234	49	PAICS	PUR6_HUMAN Multifunctional protein ADE2 OS=Homo sapiens OX=9606 GN=PAICS PE=1 SV=3			1.4	0.93	||NA|0.16971	1.165	0.33234	28.527
Q5JVF3	33	PCID2	PCID2_HUMAN PCI domain-containing protein 2 OS=Homo sapiens OX=9606 GN=PCID2 PE=1 SV=2	0.96	1.03	1.5		NA|NA|NA|	1.16333	0.29366	25.2431
P50851	1270	LRBA	LRBA_HUMAN Lipopolysaccharide-responsive and beige-like anchor protein OS=Homo sapiens OX=9606 GN=LRBA PE=1 SV=4	1.08	1.29		1.12	NA|NA||0.0	1.16333	0.1115	9.58455
P49589	30	CARS1	SYCC_HUMAN Cysteine--tRNA ligase, cytoplasmic OS=Homo sapiens OX=9606 GN=CARS1 PE=1 SV=3	0.95	1.05	1.49		NA|NA|NA|	1.16333	0.28729	24.6955
Q13526	27	PIN1	PIN1_HUMAN Peptidyl-prolyl cis-trans isomerase NIMA-interacting 1 OS=Homo sapiens OX=9606 GN=PIN1 PE=1 SV=1	1.24		1.22	1.03	NA||NA|NA	1.16333	0.1159	9.96278
Q71UI9	44	H2AZ2	H2AV_HUMAN Histone H2A.V OS=Homo sapiens OX=9606 GN=H2AZ2 PE=1 SV=3	0.91	1.09		1.48	NA|0.45255||NA	1.16	0.29138	25.119
O00178	199	GTPBP1	GTPB1_HUMAN GTP-binding protein 1 OS=Homo sapiens OX=9606 GN=GTPBP1 PE=1 SV=3	1.1	1.22			NA|NA||	1.16	0.08485	7.31466
Q14839	1321	CHD4	CHD4_HUMAN Chromodomain-helicase-DNA-binding protein 4 OS=Homo sapiens OX=9606 GN=CHD4 PE=1 SV=2	1.17		1.15		0.06928||0.0|	1.16	0.01414	1.21897
P51570	229	GALK1	GALK1_HUMAN Galactokinase OS=Homo sapiens OX=9606 GN=GALK1 PE=1 SV=1	1.36		0.96		NA||NA|	1.16	0.28284	24.3828
Q7L2E3	930	DHX30	DHX30_HUMAN ATP-dependent RNA helicase DHX30 OS=Homo sapiens OX=9606 GN=DHX30 PE=1 SV=1	1.01			1.31	0.0|||NA	1.16	0.21213	18.2871
Q9Y3T9	171	NOC2L	NOC2L_HUMAN Nucleolar complex protein 2 homolog OS=Homo sapiens OX=9606 GN=NOC2L PE=1 SV=4	1.16				NA|||	1.16	NA	#VALUE!
P47897	175	QARS1	SYQ_HUMAN Glutamine--tRNA ligase OS=Homo sapiens OX=9606 GN=QARS1 PE=1 SV=1	1.16				NA|||	1.16	NA	#VALUE!
O15269	91	SPTLC1	SPTC1_HUMAN Serine palmitoyltransferase 1 OS=Homo sapiens OX=9606 GN=SPTLC1 PE=1 SV=1		1.03	1.29		|NA|NA|	1.16	0.18385	15.8491
Q9Y490	166	TLN1	TLN1_HUMAN Talin-1 OS=Homo sapiens OX=9606 GN=TLN1 PE=1 SV=3			1.16		||NA|	1.16	NA	#VALUE!
O43852	272	CALU	CALU_HUMAN Calumenin OS=Homo sapiens OX=9606 GN=CALU PE=1 SV=2				1.16	|||NA	1.16	NA	#VALUE!
P09936	185	UCHL1	UCHL1_HUMAN Ubiquitin carboxyl-terminal hydrolase isozyme L1 OS=Homo sapiens OX=9606 GN=UCHL1 PE=1 SV=2				1.16	|||NA	1.16	NA	#VALUE!
P19525	406	EIF2AK2	E2AK2_HUMAN Interferon-induced, double-stranded RNA-activated protein kinase OS=Homo sapiens OX=9606 GN=EIF2AK2 PE=1 SV=2		0.68	1.69	1.09	|0.0|NA|NA	1.15333	0.50797	44.0438
A5YKK6	1797	CNOT1	CNOT1_HUMAN CCR4-NOT transcription complex subunit 1 OS=Homo sapiens OX=9606 GN=CNOT1 PE=1 SV=2	1.15				NA|||	1.15	NA	#VALUE!
P41091	33	EIF2S3	IF2G_HUMAN Eukaryotic translation initiation factor 2 subunit 3 OS=Homo sapiens OX=9606 GN=EIF2S3 PE=1 SV=3		0.88	1.42		|0.0|NA|	1.15	0.38184	33.2035
P50990	365	CCT8	TCPQ_HUMAN T-complex protein 1 subunit theta OS=Homo sapiens OX=9606 GN=CCT8 PE=1 SV=4		1.15			|0.0||	1.15	NA	#VALUE!
Q99798	695	ACO2	ACON_HUMAN Aconitate hydratase, mitochondrial OS=Homo sapiens OX=9606 GN=ACO2 PE=1 SV=2			1.15		||NA|	1.15	NA	#VALUE!
Q5SRE5	331	NUP188	NU188_HUMAN Nucleoporin NUP188 OS=Homo sapiens OX=9606 GN=NUP188 PE=1 SV=1			0.93	1.37	||NA|0.0	1.15	0.31113	27.0548
Q9NSI2	145	FAM207A	F207A_HUMAN Protein FAM207A OS=Homo sapiens OX=9606 GN=FAM207A PE=1 SV=2			1.15		||NA|	1.15	NA	#VALUE!
O00165	76	HAX1	HAX1_HUMAN HCLS1-associated protein X-1 OS=Homo sapiens OX=9606 GN=HAX1 PE=1 SV=2			1.44	0.86	||NA|NA	1.15	0.41012	35.6626
P48147	364	PREP	PPCE_HUMAN Prolyl endopeptidase OS=Homo sapiens OX=9606 GN=PREP PE=1 SV=2			1.12	1.18	||NA|0.0	1.15	0.04243	3.68957
Q9UKV3	1118	ACIN1	ACINU_HUMAN Apoptotic chromatin condensation inducer in the nucleus OS=Homo sapiens OX=9606 GN=ACIN1 PE=1 SV=2				1.15	|||NA	1.15	NA	#VALUE!
P46736	255	BRCC3	BRCC3_HUMAN Lys-63-specific deubiquitinase BRCC36 OS=Homo sapiens OX=9606 GN=BRCC3 PE=1 SV=2				1.15	|||NA	1.15	NA	#VALUE!
P49257	442	LMAN1	LMAN1_HUMAN Protein ERGIC-53 OS=Homo sapiens OX=9606 GN=LMAN1 PE=1 SV=2				1.15	|||NA	1.15	NA	#VALUE!
P57678	198	GEMIN4	GEMI4_HUMAN Gem-associated protein 4 OS=Homo sapiens OX=9606 GN=GEMIN4 PE=1 SV=2				1.15	|||NA	1.15	NA	#VALUE!
P48556	209	PSMD8	PSMD8_HUMAN 26S proteasome non-ATPase regulatory subunit 8 OS=Homo sapiens OX=9606 GN=PSMD8 PE=1 SV=2	1.27	1.405	0.915	1.005	NA|0.33234|0.13435|0.00707	1.14875	0.22779	19.8294
P35573	740	AGL	GDE_HUMAN Glycogen debranching enzyme OS=Homo sapiens OX=9606 GN=AGL PE=1 SV=3	1.29			1.005	NA|||0.10607	1.1475	0.20153	17.5625
O43390	280	HNRNPR	HNRPR_HUMAN Heterogeneous nuclear ribonucleoprotein R OS=Homo sapiens OX=9606 GN=HNRNPR PE=1 SV=1	1.355	1.62	0.69	0.925	0.31785|0.04761|0.0|0.05323	1.1475	0.41838	36.4601
Q9H9B4	80	SFXN1	SFXN1_HUMAN Sideroflexin-1 OS=Homo sapiens OX=9606 GN=SFXN1 PE=1 SV=4	1.88		0.8	0.76	NA||0.03464|NA	1.14667	0.6354	55.4126
P26640	550	VARS1	SYVC_HUMAN Valine--tRNA ligase OS=Homo sapiens OX=9606 GN=VARS1 PE=1 SV=4	1.12	1.17			0.0|NA||	1.145	0.03536	3.08821
Q96FW1	100	OTUB1	OTUB1_HUMAN Ubiquitin thioesterase OTUB1 OS=Homo sapiens OX=9606 GN=OTUB1 PE=1 SV=2	0.95	1.135	1.185	1.3	NA|0.05196|0.24749|0.21909	1.1425	0.14575	12.7571
P14868	444	DARS1	SYDC_HUMAN Aspartate--tRNA ligase, cytoplasmic OS=Homo sapiens OX=9606 GN=DARS1 PE=1 SV=2		0.715	1.51	1.2	|0.36664|NA|0.18385	1.14167	0.4007	35.0977
P06730	178	EIF4E	IF4E_HUMAN Eukaryotic translation initiation factor 4E OS=Homo sapiens OX=9606 GN=EIF4E PE=1 SV=2	0.94	0.99	1.64	0.99	0.04243|0.12|0.28997|0.29698	1.14	0.33417	29.3132
A0A0B4J2D5	229	GATD3B	GAL3B_HUMAN Glutamine amidotransferase-like class 1 domain-containing protein 3B, mitochondrial OS=Homo sapiens OX=9606 GN=GATD3B PE=1 SV=1	1.23		1.05		0.0||NA|	1.14	0.12728	11.1649
Q14566	556	MCM6	MCM6_HUMAN DNA replication licensing factor MCM6 OS=Homo sapiens OX=9606 GN=MCM6 PE=1 SV=1	1.32		0.96		NA||NA|	1.14	0.25456	22.3298
Q9NTI5	752	PDS5B	PDS5B_HUMAN Sister chromatid cohesion protein PDS5 homolog B OS=Homo sapiens OX=9606 GN=PDS5B PE=1 SV=1	1.14				NA|||	1.14	NA	#VALUE!
P04843	83	RPN1	RPN1_HUMAN Dolichyl-diphosphooligosaccharide--protein glycosyltransferase subunit 1 OS=Homo sapiens OX=9606 GN=RPN1 PE=1 SV=1		1.38	0.9		|0.25981|NA|	1.14	0.33941	29.7728
Q9BXS5	140	AP1M1	AP1M1_HUMAN AP-1 complex subunit mu-1 OS=Homo sapiens OX=9606 GN=AP1M1 PE=1 SV=3		1.33		0.95	|NA||NA	1.14	0.2687	23.5702
Q92887	1414	ABCC2	MRP2_HUMAN Canalicular multispecific organic anion transporter 1 OS=Homo sapiens OX=9606 GN=ABCC2 PE=1 SV=3		1.14			|NA||	1.14	NA	#VALUE!
Q9UNY4	1028	TTF2	TTF2_HUMAN Transcription termination factor 2 OS=Homo sapiens OX=9606 GN=TTF2 PE=1 SV=2		1.01	1.27		|NA|NA|	1.14	0.18385	16.1272
Q92621	905	NUP205	NU205_HUMAN Nuclear pore complex protein Nup205 OS=Homo sapiens OX=9606 GN=NUP205 PE=1 SV=3		1.31	0.86	1.25	|NA|0.26907|0.35218	1.14	0.24434	21.4333
Q14152	292	EIF3A	EIF3A_HUMAN Eukaryotic translation initiation factor 3 subunit A OS=Homo sapiens OX=9606 GN=EIF3A PE=1 SV=1			1.14		||NA|	1.14	NA	#VALUE!
Q96T76	404	MMS19	MMS19_HUMAN MMS19 nucleotide excision repair protein homolog OS=Homo sapiens OX=9606 GN=MMS19 PE=1 SV=2				1.14	|||NA	1.14	NA	#VALUE!
P14868	280	DARS1	SYDC_HUMAN Aspartate--tRNA ligase, cytoplasmic OS=Homo sapiens OX=9606 GN=DARS1 PE=1 SV=2				1.14	|||NA	1.14	NA	#VALUE!
P25685	244	DNAJB1	DNJB1_HUMAN DnaJ homolog subfamily B member 1 OS=Homo sapiens OX=9606 GN=DNAJB1 PE=1 SV=4				1.14	|||NA	1.14	NA	#VALUE!
Q9ULV4	392	CORO1C	COR1C_HUMAN Coronin-1C OS=Homo sapiens OX=9606 GN=CORO1C PE=1 SV=1				1.14	|||NA	1.14	NA	#VALUE!
P31040	625	SDHA	SDHA_HUMAN Succinate dehydrogenase [ubiquinone] flavoprotein subunit, mitochondrial OS=Homo sapiens OX=9606 GN=SDHA PE=1 SV=2				1.14	|||NA	1.14	NA	#VALUE!
Q1KMD3	729	HNRNPUL2	HNRL2_HUMAN Heterogeneous nuclear ribonucleoprotein U-like protein 2 OS=Homo sapiens OX=9606 GN=HNRNPUL2 PE=1 SV=1				1.14	|||0.0	1.14	NA	#VALUE!
O75312	277	ZPR1	ZPR1_HUMAN Zinc finger protein ZPR1 OS=Homo sapiens OX=9606 GN=ZPR1 PE=1 SV=1				1.14	|||NA	1.14	NA	#VALUE!
P49642	397	PRIM1	PRI1_HUMAN DNA primase small subunit OS=Homo sapiens OX=9606 GN=PRIM1 PE=1 SV=1				1.14	|||NA	1.14	NA	#VALUE!
P04406	291	GAPDH	G3P_HUMAN Glyceraldehyde-3-phosphate dehydrogenase OS=Homo sapiens OX=9606 GN=GAPDH PE=1 SV=3	1.72	0.63	0.98	1.22	NA|NA|NA|NA	1.1375	0.4577	40.2374
O15144	145	ARPC2	ARPC2_HUMAN Actin-related protein 2/3 complex subunit 2 OS=Homo sapiens OX=9606 GN=ARPC2 PE=1 SV=1		1.01		1.265	|NA||0.36062	1.1375	0.18031	15.8514
P82930	111	MRPS34	RT34_HUMAN 28S ribosomal protein S34, mitochondrial OS=Homo sapiens OX=9606 GN=MRPS34 PE=1 SV=2	1.58	1.055	0.77		NA|0.02121|NA|	1.135	0.41088	36.2009
P50213	317	IDH3A	IDH3A_HUMAN Isocitrate dehydrogenase [NAD] subunit alpha, mitochondrial OS=Homo sapiens OX=9606 GN=IDH3A PE=1 SV=1	1.29	0.98			0.12728|NA||	1.135	0.2192	19.3128
P35244	92	RPA3	RFA3_HUMAN Replication protein A 14 kDa subunit OS=Homo sapiens OX=9606 GN=RPA3 PE=1 SV=1		1.34		0.93	|0.18193||0.05774	1.135	0.28991	25.5427
P22102	26	GART	PUR2_HUMAN Trifunctional purine biosynthetic protein adenosine-3 OS=Homo sapiens OX=9606 GN=GART PE=1 SV=1			0.92	1.35	||NA|NA	1.135	0.30406	26.7894
P78347	498	GTF2I	GTF2I_HUMAN General transcription factor II-I OS=Homo sapiens OX=9606 GN=GTF2I PE=1 SV=2	1.49	1.13	0.93	0.98	NA|NA|NA|0.0	1.1325	0.25303	22.3426
P23396	159	RPS3	RS3_HUMAN 40S ribosomal protein S3 OS=Homo sapiens OX=9606 GN=RPS3 PE=1 SV=2		1.16	1.21	1.025	|0.15556|0.09899|0.06364	1.13167	0.0957	8.45653
Q9UJU6	112	DBNL	DBNL_HUMAN Drebrin-like protein OS=Homo sapiens OX=9606 GN=DBNL PE=1 SV=1	1.13				NA|||	1.13	NA	#VALUE!
Q13813	1303	SPTAN1	SPTN1_HUMAN Spectrin alpha chain, non-erythrocytic 1 OS=Homo sapiens OX=9606 GN=SPTAN1 PE=1 SV=3	1.19	1.23	0.97		NA|NA|NA|	1.13	0.14	12.3894
O75533	226	SF3B1	SF3B1_HUMAN Splicing factor 3B subunit 1 OS=Homo sapiens OX=9606 GN=SF3B1 PE=1 SV=3	1.6	0.95	0.93	1.04	NA|NA|NA|0.20809	1.13	0.31696	28.0496
P06737	74	PYGL	PYGL_HUMAN Glycogen phosphorylase, liver form OS=Homo sapiens OX=9606 GN=PYGL PE=1 SV=4		1.13			|NA||	1.13	NA	#VALUE!
P08237	734	PFKM	PFKAM_HUMAN ATP-dependent 6-phosphofructokinase, muscle type OS=Homo sapiens OX=9606 GN=PFKM PE=1 SV=2		1.26	1		|NA|NA|	1.13	0.18385	16.2699
P16383	286	GCFC2	GCFC2_HUMAN Intron Large complex component GCFC2 OS=Homo sapiens OX=9606 GN=GCFC2 PE=1 SV=2		1.13			|NA||	1.13	NA	#VALUE!
P85037	228	FOXK1	FOXK1_HUMAN Forkhead box protein K1 OS=Homo sapiens OX=9606 GN=FOXK1 PE=1 SV=1		1.13			|NA||	1.13	NA	#VALUE!
O75153	561	CLUH	CLU_HUMAN Clustered mitochondria protein homolog OS=Homo sapiens OX=9606 GN=CLUH PE=1 SV=2		1.13			|NA||	1.13	NA	#VALUE!
Q9BXW7	130	HDHD5	HDHD5_HUMAN Haloacid dehalogenase-like hydrolase domain-containing 5 OS=Homo sapiens OX=9606 GN=HDHD5 PE=1 SV=1			1.13		||NA|	1.13	NA	#VALUE!
A0A0B4J2D5	196	GATD3B	GAL3B_HUMAN Glutamine amidotransferase-like class 1 domain-containing protein 3B, mitochondrial OS=Homo sapiens OX=9606 GN=GATD3B PE=1 SV=1				1.13	|||NA	1.13	NA	#VALUE!
Q16762	139	TST	THTR_HUMAN Thiosulfate sulfurtransferase OS=Homo sapiens OX=9606 GN=TST PE=1 SV=4				1.13	|||NA	1.13	NA	#VALUE!
Q92616	2236	GCN1	GCN1_HUMAN eIF-2-alpha kinase activator GCN1 OS=Homo sapiens OX=9606 GN=GCN1 PE=1 SV=6				1.13	|||NA	1.13	NA	#VALUE!
Q9BXP5	202	SRRT	SRRT_HUMAN Serrate RNA effector molecule homolog OS=Homo sapiens OX=9606 GN=SRRT PE=1 SV=1	0.93	1.13	0.865	1.59	0.11314|0.18385|0.06364|NA	1.12875	0.32753	29.0171
Q9NTJ3	513	SMC4	SMC4_HUMAN Structural maintenance of chromosomes protein 4 OS=Homo sapiens OX=9606 GN=SMC4 PE=1 SV=2		1.51	1.35	0.52	|NA|NA|NA	1.12667	0.53144	47.1691
Q8N357	204	SLC35F6	S35F6_HUMAN Solute carrier family 35 member F6 OS=Homo sapiens OX=9606 GN=SLC35F6 PE=1 SV=1	1.13			1.12	NA|||NA	1.125	0.00707	0.628444
P49327	1735	FASN	FAS_HUMAN Fatty acid synthase OS=Homo sapiens OX=9606 GN=FASN PE=1 SV=3	1.24			1.01	0.05196|||0.07071	1.125	0.16263	14.456
P26440	271	IVD	IVD_HUMAN Isovaleryl-CoA dehydrogenase, mitochondrial OS=Homo sapiens OX=9606 GN=IVD PE=1 SV=2		1.16	1.09		|NA|NA|	1.125	0.0495	4.4
P31153	277	MAT2A	METK2_HUMAN S-adenosylmethionine synthase isoform type-2 OS=Homo sapiens OX=9606 GN=MAT2A PE=1 SV=1	1.12	1.255	0.995		NA|0.45962|0.09192|	1.12333	0.13003	11.5754
Q16795	122	NDUFA9	NDUA9_HUMAN NADH dehydrogenase [ubiquinone] 1 alpha subcomplex subunit 9, mitochondrial OS=Homo sapiens OX=9606 GN=NDUFA9 PE=1 SV=2	0.99	1.42		0.96	NA|0.01414||NA	1.12333	0.25736	22.9105
O00273	240	DFFA	DFFA_HUMAN DNA fragmentation factor subunit alpha OS=Homo sapiens OX=9606 GN=DFFA PE=1 SV=1	1.05	1.195			NA|0.14434||	1.1225	0.10253	9.13408
P51151	181	RAB9A	RAB9A_HUMAN Ras-related protein Rab-9A OS=Homo sapiens OX=9606 GN=RAB9A PE=1 SV=1	1.035	1.05	1.54	0.86	0.23335|NA|NA|NA	1.12125	0.29219	26.0593
P78371	269	CCT2	TCPB_HUMAN T-complex protein 1 subunit beta OS=Homo sapiens OX=9606 GN=CCT2 PE=1 SV=4	2.18	0.56	0.915	0.825	NA|NA|0.06076|0.12247	1.12	0.72255	64.5134
Q9UBD5	590	ORC3	ORC3_HUMAN Origin recognition complex subunit 3 OS=Homo sapiens OX=9606 GN=ORC3 PE=1 SV=1	1.12				NA|||	1.12	NA	#VALUE!
Q5U5X0	75	LYRM7	LYRM7_HUMAN Complex III assembly factor LYRM7 OS=Homo sapiens OX=9606 GN=LYRM7 PE=1 SV=1	1.25	1.29	0.82		NA|NA|0.0|	1.12	0.26058	23.2661
P51531	870	SMARCA2	SMCA2_HUMAN Probable global transcription activator SNF2L2 OS=Homo sapiens OX=9606 GN=SMARCA2 PE=1 SV=2	1.12				NA|||	1.12	NA	#VALUE!
P08754	188	GNAI3	GNAI3_HUMAN Guanine nucleotide-binding protein G(i) subunit alpha OS=Homo sapiens OX=9606 GN=GNAI3 PE=1 SV=3	0.89		1.24	1.23	NA||NA|NA	1.12	0.19925	17.7902
Q9P2J5	1080	LARS1	SYLC_HUMAN Leucine--tRNA ligase, cytoplasmic OS=Homo sapiens OX=9606 GN=LARS1 PE=1 SV=2	1.36	0.85	1.15		0.67882|NA|NA|	1.12	0.25632	22.8857
Q9Y4L1	542	HYOU1	HYOU1_HUMAN Hypoxia up-regulated protein 1 OS=Homo sapiens OX=9606 GN=HYOU1 PE=1 SV=1	1.12				NA|||	1.12	NA	#VALUE!
P53041	438	PPP5C	PPP5_HUMAN Serine/threonine-protein phosphatase 5 OS=Homo sapiens OX=9606 GN=PPP5C PE=1 SV=1		0.91	1.33		|NA|NA|	1.12	0.29698	26.5161
Q9NUU7	424	DDX19A	DD19A_HUMAN ATP-dependent RNA helicase DDX19A OS=Homo sapiens OX=9606 GN=DDX19A PE=1 SV=1		1.12			|0.04193||	1.12	NA	#VALUE!
Q9BW92	247	TARS2	SYTM_HUMAN Threonine--tRNA ligase, mitochondrial OS=Homo sapiens OX=9606 GN=TARS2 PE=1 SV=1		1.12			|NA||	1.12	NA	#VALUE!
Q9UN37	312	VPS4A	VPS4A_HUMAN Vacuolar protein sorting-associated protein 4A OS=Homo sapiens OX=9606 GN=VPS4A PE=1 SV=1		1.12			|NA||	1.12	NA	#VALUE!
Q9UQ05	571	KCNH4	KCNH4_HUMAN Potassium voltage-gated channel subfamily H member 4 OS=Homo sapiens OX=9606 GN=KCNH4 PE=2 SV=1		1.12			|NA||	1.12	NA	#VALUE!
Q9Y6C9	139	MTCH2	MTCH2_HUMAN Mitochondrial carrier homolog 2 OS=Homo sapiens OX=9606 GN=MTCH2 PE=1 SV=1		1.12			|NA||	1.12	NA	#VALUE!
P60174	186	TPI1	TPIS_HUMAN Triosephosphate isomerase OS=Homo sapiens OX=9606 GN=TPI1 PE=1 SV=4			1.12		||NA|	1.12	NA	#VALUE!
Q12931	330	TRAP1	TRAP1_HUMAN Heat shock protein 75 kDa, mitochondrial OS=Homo sapiens OX=9606 GN=TRAP1 PE=1 SV=3			1.12		||NA|	1.12	NA	#VALUE!
Q96KR1	765	ZFR	ZFR_HUMAN Zinc finger RNA-binding protein OS=Homo sapiens OX=9606 GN=ZFR PE=1 SV=2			1.12		||NA|	1.12	NA	#VALUE!
P14735	957	IDE	IDE_HUMAN Insulin-degrading enzyme OS=Homo sapiens OX=9606 GN=IDE PE=1 SV=4			1.12		||NA|	1.12	NA	#VALUE!
P24928	947	POLR2A	RPB1_HUMAN DNA-directed RNA polymerase II subunit RPB1 OS=Homo sapiens OX=9606 GN=POLR2A PE=1 SV=2			1.12		||NA|	1.12	NA	#VALUE!
Q9BRK5	78	SDF4	CAB45_HUMAN 45 kDa calcium-binding protein OS=Homo sapiens OX=9606 GN=SDF4 PE=1 SV=1			1.12		||NA|	1.12	NA	#VALUE!
Q08J23	146	NSUN2	NSUN2_HUMAN RNA cytosine C(5)-methyltransferase NSUN2 OS=Homo sapiens OX=9606 GN=NSUN2 PE=1 SV=2			1.12		||0.66468|	1.12	NA	#VALUE!
P31040	621	SDHA	SDHA_HUMAN Succinate dehydrogenase [ubiquinone] flavoprotein subunit, mitochondrial OS=Homo sapiens OX=9606 GN=SDHA PE=1 SV=2				1.12	|||NA	1.12	NA	#VALUE!
Q96C19	130	EFHD2	EFHD2_HUMAN EF-hand domain-containing protein D2 OS=Homo sapiens OX=9606 GN=EFHD2 PE=1 SV=1				1.12	|||0.0	1.12	NA	#VALUE!
Q9NUJ1	255	ABHD10	ABHDA_HUMAN Palmitoyl-protein thioesterase ABHD10, mitochondrial OS=Homo sapiens OX=9606 GN=ABHD10 PE=1 SV=1				1.12	|||NA	1.12	NA	#VALUE!
Q9Y265	348	RUVBL1	RUVB1_HUMAN RuvB-like 1 OS=Homo sapiens OX=9606 GN=RUVBL1 PE=1 SV=1	1.49	1.07	0.92	0.995	NA|0.78621|0.05215|0.18839	1.11875	0.25496	22.7897
Q9BQG0	586	MYBBP1A	MBB1A_HUMAN Myb-binding protein 1A OS=Homo sapiens OX=9606 GN=MYBBP1A PE=1 SV=2	1.1			1.135	0.07234|||0.16263	1.1175	0.02475	2.21477
O75643	1158	SNRNP200	U520_HUMAN U5 small nuclear ribonucleoprotein 200 kDa helicase OS=Homo sapiens OX=9606 GN=SNRNP200 PE=1 SV=2	1.2		1.09	1.06	NA||0.07506|NA	1.11667	0.07371	6.60088
Q07020	160	RPL18	RL18_HUMAN 60S ribosomal protein L18 OS=Homo sapiens OX=9606 GN=RPL18 PE=1 SV=2	0.8	0.93	1.21	1.525	0.11547|0.24377|0.12971|0.0495	1.11625	0.32175	28.8242
Q9H7Z7	377	PTGES2	PGES2_HUMAN Prostaglandin E synthase 2 OS=Homo sapiens OX=9606 GN=PTGES2 PE=1 SV=1	1.05		1.18		NA||NA|	1.115	0.09192	8.24395
O95197	910	RTN3	RTN3_HUMAN Reticulon-3 OS=Homo sapiens OX=9606 GN=RTN3 PE=1 SV=2			1.07	1.16	||0.14422|NA	1.115	0.06364	5.70762
O43765	175	SGTA	SGTA_HUMAN Small glutamine-rich tetratricopeptide repeat-containing protein alpha OS=Homo sapiens OX=9606 GN=SGTA PE=1 SV=1			1.115		||0.16263|	1.115	NA	#VALUE!
P43490	490	NAMPT	NAMPT_HUMAN Nicotinamide phosphoribosyltransferase OS=Homo sapiens OX=9606 GN=NAMPT PE=1 SV=1			1.07	1.16	||NA|NA	1.115	0.06364	5.70762
Q9UHQ9	72	CYB5R1	NB5R1_HUMAN NADH-cytochrome b5 reductase 1 OS=Homo sapiens OX=9606 GN=CYB5R1 PE=1 SV=1				1.115	|||0.2192	1.115	NA	#VALUE!
Q93008	634	USP9X	USP9X_HUMAN Probable ubiquitin carboxyl-terminal hydrolase FAF-X OS=Homo sapiens OX=9606 GN=USP9X PE=1 SV=4	1.06	1.47	0.81		NA|NA|NA|	1.11333	0.33322	29.93
P27144	33	AK4	KAD4_HUMAN Adenylate kinase 4, mitochondrial OS=Homo sapiens OX=9606 GN=AK4 PE=1 SV=1	0.96	1.265			NA|0.28991||	1.1125	0.21567	19.3861
Q9UM00	181	TMCO1	TMCO1_HUMAN Calcium load-activated calcium channel OS=Homo sapiens OX=9606 GN=TMCO1 PE=1 SV=2	0.98	0.97	1.035	1.46	0.10214|0.10112|0.19468|0.29	1.11125	0.23425	21.0799
Q9BRA2	16	TXNDC17	TXD17_HUMAN Thioredoxin domain-containing protein 17 OS=Homo sapiens OX=9606 GN=TXNDC17 PE=1 SV=1	1	1.38	0.88	1.18	1.04822|0.2692|0.08679|0.11942	1.11	0.21817	19.655
P06733	133	ENO1	ENOA_HUMAN Alpha-enolase OS=Homo sapiens OX=9606 GN=ENO1 PE=1 SV=2	0.94		1.03	1.36	NA||NA|0.60811	1.11	0.22113	19.9216
Q14247	296	CTTN	SRC8_HUMAN Src substrate cortactin OS=Homo sapiens OX=9606 GN=CTTN PE=1 SV=2		1.11			|NA||	1.11	NA	#VALUE!
P04843	45	RPN1	RPN1_HUMAN Dolichyl-diphosphooligosaccharide--protein glycosyltransferase subunit 1 OS=Homo sapiens OX=9606 GN=RPN1 PE=1 SV=1		1.11			|NA||	1.11	NA	#VALUE!
Q9UL25	82	RAB21	RAB21_HUMAN Ras-related protein Rab-21 OS=Homo sapiens OX=9606 GN=RAB21 PE=1 SV=3		1.11			|NA||	1.11	NA	#VALUE!
O60841	655	EIF5B	IF2P_HUMAN Eukaryotic translation initiation factor 5B OS=Homo sapiens OX=9606 GN=EIF5B PE=1 SV=4		1.09		1.13	|NA||NA	1.11	0.02828	2.54775
P25705	306	ATP5F1A	ATPA_HUMAN ATP synthase subunit alpha, mitochondrial OS=Homo sapiens OX=9606 GN=ATP5F1A PE=1 SV=1		1.11			|0.0||	1.11	NA	#VALUE!
P35658	848	NUP214	NU214_HUMAN Nuclear pore complex protein Nup214 OS=Homo sapiens OX=9606 GN=NUP214 PE=1 SV=2			1.11		||NA|	1.11	NA	#VALUE!
P30876	144	POLR2B	RPB2_HUMAN DNA-directed RNA polymerase II subunit RPB2 OS=Homo sapiens OX=9606 GN=POLR2B PE=1 SV=1				1.11	|||NA	1.11	NA	#VALUE!
P49750	312	YLPM1	YLPM1_HUMAN YLP motif-containing protein 1 OS=Homo sapiens OX=9606 GN=YLPM1 PE=1 SV=4				1.11	|||NA	1.11	NA	#VALUE!
P00918	36	CA2	CAH2_HUMAN Carbonic anhydrase 2 OS=Homo sapiens OX=9606 GN=CA2 PE=1 SV=2				1.11	|||0.10149	1.11	NA	#VALUE!
P06748	40	NPM1	NPM_HUMAN Nucleophosmin OS=Homo sapiens OX=9606 GN=NPM1 PE=1 SV=2	1.42	1.205	0.84	0.97	0.09417|0.18645|0.15731|0.1603	1.10875	0.25666	23.1486
Q53GS9	492	USP39	SNUT2_HUMAN U4/U6.U5 tri-snRNP-associated protein 2 OS=Homo sapiens OX=9606 GN=USP39 PE=1 SV=2	1.28		0.97	1.07	NA||NA|NA	1.10667	0.15822	14.2969
O15067	577	PFAS	PUR4_HUMAN Phosphoribosylformylglycinamidine synthase OS=Homo sapiens OX=9606 GN=PFAS PE=1 SV=4	1.075	0.93	1.315		0.07588|0.005|0.00707|	1.10667	0.19444	17.5698
P26358	1332	DNMT1	DNMT1_HUMAN DNA (cytosine-5)-methyltransferase 1 OS=Homo sapiens OX=9606 GN=DNMT1 PE=1 SV=2		0.87	1.37	1.08	|NA|0.22|0.19799	1.10667	0.25106	22.6861
P53007	78	SLC25A1	TXTP_HUMAN Tricarboxylate transport protein, mitochondrial OS=Homo sapiens OX=9606 GN=SLC25A1 PE=1 SV=2	1.36	0.905	1.26	0.9	NA|0.12021|NA|0.08485	1.10625	0.23879	21.5855
Q15393	985	SF3B3	SF3B3_HUMAN Splicing factor 3B subunit 3 OS=Homo sapiens OX=9606 GN=SF3B3 PE=1 SV=4	1.245	1.04		1.03	0.60104|0.07506||0.14083	1.105	0.12135	10.9819
P78527	2682	PRKDC	PRKDC_HUMAN DNA-dependent protein kinase catalytic subunit OS=Homo sapiens OX=9606 GN=PRKDC PE=1 SV=3	1.36		0.85		0.0||NA|	1.105	0.36062	32.6353
Q969Z0	544	TBRG4	FAKD4_HUMAN FAST kinase domain-containing protein 4 OS=Homo sapiens OX=9606 GN=TBRG4 PE=1 SV=1		1.17	1.04		|NA|0.0|	1.105	0.09192	8.31855
Q12874	339	SF3A3	SF3A3_HUMAN Splicing factor 3A subunit 3 OS=Homo sapiens OX=9606 GN=SF3A3 PE=1 SV=1	1.41	1.02	0.88		0.1963|NA|0.0|	1.10333	0.27465	24.8928
Q08752	109	PPID	PPID_HUMAN Peptidyl-prolyl cis-trans isomerase D OS=Homo sapiens OX=9606 GN=PPID PE=1 SV=3	0.93	1.33	1.05		0.04243|NA|NA|	1.10333	0.20526	18.6037
P28288	350	ABCD3	ABCD3_HUMAN ATP-binding cassette sub-family D member 3 OS=Homo sapiens OX=9606 GN=ABCD3 PE=1 SV=1	1.33	1.27	0.92	0.89	0.3926|NA|0.38682|0.25456	1.1025	0.22969	20.8336
P26639	441	TARS1	SYTC_HUMAN Threonine--tRNA ligase 1, cytoplasmic OS=Homo sapiens OX=9606 GN=TARS1 PE=1 SV=3	1.08	1.21	1.09	1.03	0.12956|0.25854|0.18646|0.21509	1.1025	0.07632	6.92245
P51572	230	BCAP31	BAP31_HUMAN B-cell receptor-associated protein 31 OS=Homo sapiens OX=9606 GN=BCAP31 PE=1 SV=3	1.01	0.825		1.47	NA|0.0495||NA	1.10167	0.33213	30.1479
O14617	646	AP3D1	AP3D1_HUMAN AP-3 complex subunit delta-1 OS=Homo sapiens OX=9606 GN=AP3D1 PE=1 SV=1	0.99	1.21			NA|NA||	1.1	0.15556	14.1418
O43143	153	DHX15	DHX15_HUMAN Pre-mRNA-splicing factor ATP-dependent RNA helicase DHX15 OS=Homo sapiens OX=9606 GN=DHX15 PE=1 SV=2	1.05	1.39	0.99	0.97	0.11026|0.57209|NA|0.19035	1.1	0.1963	17.8455
P31939	385	ATIC	PUR9_HUMAN Bifunctional purine biosynthesis protein ATIC OS=Homo sapiens OX=9606 GN=ATIC PE=1 SV=3	1.27		0.93		0.0||NA|	1.1	0.24042	21.8564
Q9BTW9	588	TBCD	TBCD_HUMAN Tubulin-specific chaperone D OS=Homo sapiens OX=9606 GN=TBCD PE=1 SV=2	1.22			0.98	0.0|||NA	1.1	0.16971	15.4282
Q5T6V5	248	C9orf64	QSPP_HUMAN Queuosine salvage protein OS=Homo sapiens OX=9606 GN=C9orf64 PE=1 SV=1	1.1				NA|||	1.1	NA	#VALUE!
Q92945	486	KHSRP	FUBP2_HUMAN Far upstream element-binding protein 2 OS=Homo sapiens OX=9606 GN=KHSRP PE=1 SV=4		1.1			|NA||	1.1	NA	#VALUE!
Q8WWM7	386	ATXN2L	ATX2L_HUMAN Ataxin-2-like protein OS=Homo sapiens OX=9606 GN=ATXN2L PE=1 SV=2			1.1		||NA|	1.1	NA	#VALUE!
Q8WWM7	385	ATXN2L	ATX2L_HUMAN Ataxin-2-like protein OS=Homo sapiens OX=9606 GN=ATXN2L PE=1 SV=2			1.1		||NA|	1.1	NA	#VALUE!
Q13620	415	CUL4B	CUL4B_HUMAN Cullin-4B OS=Homo sapiens OX=9606 GN=CUL4B PE=1 SV=4			1.27	0.93	||NA|NA	1.1	0.24042	21.8564
P57740	302	NUP107	NU107_HUMAN Nuclear pore complex protein Nup107 OS=Homo sapiens OX=9606 GN=NUP107 PE=1 SV=1			1.1		||NA|	1.1	NA	#VALUE!
Q02978	66	SLC25A11	M2OM_HUMAN Mitochondrial 2-oxoglutarate/malate carrier protein OS=Homo sapiens OX=9606 GN=SLC25A11 PE=1 SV=3			1.1		||NA|	1.1	NA	#VALUE!
Q9H993	37	ARMT1	ARMT1_HUMAN Damage-control phosphatase ARMT1 OS=Homo sapiens OX=9606 GN=ARMT1 PE=1 SV=1				1.1	|||NA	1.1	NA	#VALUE!
P46060	519	RANGAP1	RAGP1_HUMAN Ran GTPase-activating protein 1 OS=Homo sapiens OX=9606 GN=RANGAP1 PE=1 SV=1				1.1	|||NA	1.1	NA	#VALUE!
Q9NRF8	271	CTPS2	PYRG2_HUMAN CTP synthase 2 OS=Homo sapiens OX=9606 GN=CTPS2 PE=1 SV=1				1.1	|||NA	1.1	NA	#VALUE!
P51610	140	HCFC1	HCFC1_HUMAN Host cell factor 1 OS=Homo sapiens OX=9606 GN=HCFC1 PE=1 SV=2	0.955	1.155	1.06	1.22	0.0495|0.09192|NA|0.08355	1.0975	0.11551	10.5248
Q9Y676	114	MRPS18B	RT18B_HUMAN 28S ribosomal protein S18b, mitochondrial OS=Homo sapiens OX=9606 GN=MRPS18B PE=1 SV=1	1.27	0.43	1.59		NA|NA|NA|	1.09667	0.59911	54.6299
P52272	152	HNRNPM	HNRPM_HUMAN Heterogeneous nuclear ribonucleoprotein M OS=Homo sapiens OX=9606 GN=HNRNPM PE=1 SV=3		0.85	1.41	1.03	|NA|NA|NA	1.09667	0.28589	26.0689
Q01105	157	SET	SET_HUMAN Protein SET OS=Homo sapiens OX=9606 GN=SET PE=1 SV=3			1.04	1.15	||0.07071|NA	1.095	0.07778	7.1032
Q9BXW7	386	HDHD5	HDHD5_HUMAN Haloacid dehalogenase-like hydrolase domain-containing 5 OS=Homo sapiens OX=9606 GN=HDHD5 PE=1 SV=1			1.22	0.97	||NA|NA	1.095	0.17678	16.1443
P19367	244	HK1	HXK1_HUMAN Hexokinase-1 OS=Homo sapiens OX=9606 GN=HK1 PE=1 SV=3			1.095		||0.03536|	1.095	NA	#VALUE!
Q68E01	472	INTS3	INT3_HUMAN Integrator complex subunit 3 OS=Homo sapiens OX=9606 GN=INTS3 PE=1 SV=1			1.1	1.09	||0.0|NA	1.095	0.00707	0.645662
Q9NWW5	29	CLN6	CLN6_HUMAN Ceroid-lipofuscinosis neuronal protein 6 OS=Homo sapiens OX=9606 GN=CLN6 PE=1 SV=1	1.12			1.06	NA|||NA	1.09	0.04243	3.89266
Q9NPL8	124	TIMMDC1	TIDC1_HUMAN Complex I assembly factor TIMMDC1, mitochondrial OS=Homo sapiens OX=9606 GN=TIMMDC1 PE=1 SV=2	1.04		1.32	0.91	0.05774||NA|NA	1.09	0.20952	19.222
Q96RP9	54	GFM1	EFGM_HUMAN Elongation factor G, mitochondrial OS=Homo sapiens OX=9606 GN=GFM1 PE=1 SV=2	1.09				NA|||	1.09	NA	#VALUE!
Q13283	127	G3BP1	G3BP1_HUMAN Ras GTPase-activating protein-binding protein 1 OS=Homo sapiens OX=9606 GN=G3BP1 PE=1 SV=1	0.91	0.92	1.12	1.41	NA|NA|NA|0.16971	1.09	0.23424	21.4899
P43003	496	SLC1A3	EAA1_HUMAN Excitatory amino acid transporter 1 OS=Homo sapiens OX=9606 GN=SLC1A3 PE=1 SV=1	1.09				NA|||	1.09	NA	#VALUE!
P26440	63	IVD	IVD_HUMAN Isovaleryl-CoA dehydrogenase, mitochondrial OS=Homo sapiens OX=9606 GN=IVD PE=1 SV=2		1.09			|NA||	1.09	NA	#VALUE!
Q15393	19	SF3B3	SF3B3_HUMAN Splicing factor 3B subunit 3 OS=Homo sapiens OX=9606 GN=SF3B3 PE=1 SV=4		1.09			|NA||	1.09	NA	#VALUE!
P35606	319	COPB2	COPB2_HUMAN Coatomer subunit beta' OS=Homo sapiens OX=9606 GN=COPB2 PE=1 SV=2			1.09		||0.35355|	1.09	NA	#VALUE!
Q14691	193	GINS1	PSF1_HUMAN DNA replication complex GINS protein PSF1 OS=Homo sapiens OX=9606 GN=GINS1 PE=1 SV=1			1.09		||NA|	1.09	NA	#VALUE!
Q9BPU6	230	DPYSL5	DPYL5_HUMAN Dihydropyrimidinase-related protein 5 OS=Homo sapiens OX=9606 GN=DPYSL5 PE=1 SV=1			1.09		||NA|	1.09	NA	#VALUE!
Q9BV44	297	THUMPD3	THUM3_HUMAN THUMP domain-containing protein 3 OS=Homo sapiens OX=9606 GN=THUMPD3 PE=1 SV=1				1.09	|||NA	1.09	NA	#VALUE!
O75717	615	WDHD1	WDHD1_HUMAN WD repeat and HMG-box DNA-binding protein 1 OS=Homo sapiens OX=9606 GN=WDHD1 PE=1 SV=1				1.09	|||NA	1.09	NA	#VALUE!
P55786	875	NPEPPS	PSA_HUMAN Puromycin-sensitive aminopeptidase OS=Homo sapiens OX=9606 GN=NPEPPS PE=1 SV=2	0.95	1.12	0.99	1.29	NA|NA|NA|NA	1.0875	0.15327	14.0938
P78371	148	CCT2	TCPB_HUMAN T-complex protein 1 subunit beta OS=Homo sapiens OX=9606 GN=CCT2 PE=1 SV=4	1.27	1.26	0.845	0.975	0.45807|0.31988|0.28905|0.17863	1.0875	0.21176	19.4722
Q9NX20	149	MRPL16	RM16_HUMAN 39S ribosomal protein L16, mitochondrial OS=Homo sapiens OX=9606 GN=MRPL16 PE=1 SV=1	1.18		0.97	1.11	NA||NA|0.45255	1.08667	0.10693	9.84015
P08559	121	PDHA1	ODPA_HUMAN Pyruvate dehydrogenase E1 component subunit alpha, somatic form, mitochondrial OS=Homo sapiens OX=9606 GN=PDHA1 PE=1 SV=3	1.35		0.925	0.98	NA||0.12817|0.06928	1.085	0.23114	21.3032
Q01780	405	EXOSC10	EXOSX_HUMAN Exosome component 10 OS=Homo sapiens OX=9606 GN=EXOSC10 PE=1 SV=2		1.085			|0.45962||	1.085	NA	#VALUE!
P13861	384	PRKAR2A	KAP2_HUMAN cAMP-dependent protein kinase type II-alpha regulatory subunit OS=Homo sapiens OX=9606 GN=PRKAR2A PE=1 SV=2			1.2	0.97	||NA|NA	1.085	0.16263	14.9889
Q14739	102	LBR	LBR_HUMAN Delta(14)-sterol reductase LBR OS=Homo sapiens OX=9606 GN=LBR PE=1 SV=2	1.105	1.265	0.97	0.995	0.10607|0.00707|NA|0.03536	1.08375	0.13431	12.3931
P14618	391	PKM	KPYM_HUMAN Pyruvate kinase PKM OS=Homo sapiens OX=9606 GN=PKM PE=1 SV=4	1.27	1.22	0.95	0.895	0.35182|0.18744|0.09391|0.24868	1.08375	0.18865	17.4072
Q14247	102	CTTN	SRC8_HUMAN Src substrate cortactin OS=Homo sapiens OX=9606 GN=CTTN PE=1 SV=2	0.83			1.33	NA|||0.0	1.08	0.35355	32.7361
P13804	81	ETFA	ETFA_HUMAN Electron transfer flavoprotein subunit alpha, mitochondrial OS=Homo sapiens OX=9606 GN=ETFA PE=1 SV=1	1.005	1.19	0.995	1.13	0.30406|0.0|0.16263|0.02309	1.08	0.09566	8.85741
Q969Z0	109	TBRG4	FAKD4_HUMAN FAST kinase domain-containing protein 4 OS=Homo sapiens OX=9606 GN=TBRG4 PE=1 SV=1	1.1	1.06			NA|NA||	1.08	0.02828	2.61852
P27708	846	CAD	PYR1_HUMAN CAD protein OS=Homo sapiens OX=9606 GN=CAD PE=1 SV=3	0.99	0.95	1.14	1.24	NA|NA|0.24249|0.2071	1.08	0.13441	12.4454
Q09666	4308	AHNAK	AHNK_HUMAN Neuroblast differentiation-associated protein AHNAK OS=Homo sapiens OX=9606 GN=AHNAK PE=1 SV=2	1.08				NA|||	1.08	NA	#VALUE!
Q09666	4052	AHNAK	AHNK_HUMAN Neuroblast differentiation-associated protein AHNAK OS=Homo sapiens OX=9606 GN=AHNAK PE=1 SV=2	1.08				NA|||	1.08	NA	#VALUE!
Q09666	2758	AHNAK	AHNK_HUMAN Neuroblast differentiation-associated protein AHNAK OS=Homo sapiens OX=9606 GN=AHNAK PE=1 SV=2	1.08				NA|||	1.08	NA	#VALUE!
Q09666	2235	AHNAK	AHNK_HUMAN Neuroblast differentiation-associated protein AHNAK OS=Homo sapiens OX=9606 GN=AHNAK PE=1 SV=2	1.08				NA|||	1.08	NA	#VALUE!
Q09666	741	AHNAK	AHNK_HUMAN Neuroblast differentiation-associated protein AHNAK OS=Homo sapiens OX=9606 GN=AHNAK PE=1 SV=2	1.08				NA|||	1.08	NA	#VALUE!
Q9NPD8	76	UBE2T	UBE2T_HUMAN Ubiquitin-conjugating enzyme E2 T OS=Homo sapiens OX=9606 GN=UBE2T PE=1 SV=1	0.83			1.33	NA|||0.16971	1.08	0.35355	32.7361
P41252	55	IARS1	SYIC_HUMAN Isoleucine--tRNA ligase, cytoplasmic OS=Homo sapiens OX=9606 GN=IARS1 PE=1 SV=2	1.08				NA|||	1.08	NA	#VALUE!
P89462	649	RIR1	RIR1_HHV2H Ribonucleoside-diphosphate reductase large subunit OS=Human herpesvirus 2 (strain HG52) OX=10315 GN=RIR1 PE=1 SV=1		1.08			|NA||	1.08	NA	#VALUE!
P06737	378	PYGL	PYGL_HUMAN Glycogen phosphorylase, liver form OS=Homo sapiens OX=9606 GN=PYGL PE=1 SV=4		0.98	1.18		|0.04243|NA|	1.08	0.14142	13.0944
Q16891	407	IMMT	MIC60_HUMAN MICOS complex subunit MIC60 OS=Homo sapiens OX=9606 GN=IMMT PE=1 SV=1		1.08			|NA||	1.08	NA	#VALUE!
Q9Y399	69	MRPS2	RT02_HUMAN 28S ribosomal protein S2, mitochondrial OS=Homo sapiens OX=9606 GN=MRPS2 PE=1 SV=1			1.08		||NA|	1.08	NA	#VALUE!
Q13242	213	SRSF9	SRSF9_HUMAN Serine/arginine-rich splicing factor 9 OS=Homo sapiens OX=9606 GN=SRSF9 PE=1 SV=1			1.04	1.12	||NA|NA	1.08	0.05657	5.23796
P61289	76	PSME3	PSME3_HUMAN Proteasome activator complex subunit 3 OS=Homo sapiens OX=9606 GN=PSME3 PE=1 SV=1			1.08		||NA|	1.08	NA	#VALUE!
Q08J23	128	NSUN2	NSUN2_HUMAN RNA cytosine C(5)-methyltransferase NSUN2 OS=Homo sapiens OX=9606 GN=NSUN2 PE=1 SV=2			1.08		||NA|	1.08	NA	#VALUE!
Q5VT66	147	MTARC1	MARC1_HUMAN Mitochondrial amidoxime-reducing component 1 OS=Homo sapiens OX=9606 GN=MTARC1 PE=1 SV=1				1.08	|||NA	1.08	NA	#VALUE!
P53621	204	COPA	COPA_HUMAN Coatomer subunit alpha OS=Homo sapiens OX=9606 GN=COPA PE=1 SV=2				1.08	|||NA	1.08	NA	#VALUE!
P12277	29	CKB	KCRB_HUMAN Creatine kinase B-type OS=Homo sapiens OX=9606 GN=CKB PE=1 SV=1				1.08	|||0.20128	1.08	NA	#VALUE!
P62195	241	PSMC5	PRS8_HUMAN 26S proteasome regulatory subunit 8 OS=Homo sapiens OX=9606 GN=PSMC5 PE=1 SV=1				1.08	|||NA	1.08	NA	#VALUE!
P31689	225	DNAJA1	DNJA1_HUMAN DnaJ homolog subfamily A member 1 OS=Homo sapiens OX=9606 GN=DNAJA1 PE=1 SV=2				1.08	|||0.0	1.08	NA	#VALUE!
P18031	54	PTPN1	PTN1_HUMAN Tyrosine-protein phosphatase non-receptor type 1 OS=Homo sapiens OX=9606 GN=PTPN1 PE=1 SV=1	1.07	1.065	1.13	1.05	0.15979|0.06364|0.0|0.12324	1.07875	0.03521	3.26396
Q8WW12	169	PCNP	PCNP_HUMAN PEST proteolytic signal-containing nuclear protein OS=Homo sapiens OX=9606 GN=PCNP PE=1 SV=2	1.17	1.12	0.9	1.12	NA|NA|NA|NA	1.0775	0.12066	11.1981
P78527	2777	PRKDC	PRKDC_HUMAN DNA-dependent protein kinase catalytic subunit OS=Homo sapiens OX=9606 GN=PRKDC PE=1 SV=3	1.025	1.06	1.32	0.905	0.07778|0.27284|0.01155|0.09192	1.0775	0.17476	16.219
P49327	1004	FASN	FAS_HUMAN Fatty acid synthase OS=Homo sapiens OX=9606 GN=FASN PE=1 SV=3	1.39	1.07	0.77		0.0|NA|0.0|	1.07667	0.31005	28.7971
P31930	95	UQCRC1	QCR1_HUMAN Cytochrome b-c1 complex subunit 1, mitochondrial OS=Homo sapiens OX=9606 GN=UQCRC1 PE=1 SV=3		1.07	0.7	1.46	|0.0|0.01155|0.25981	1.07667	0.38004	35.2977
P54136	568	RARS1	SYRC_HUMAN Arginine--tRNA ligase, cytoplasmic OS=Homo sapiens OX=9606 GN=RARS1 PE=1 SV=2	1.135	0.93	1.05	1.19	0.13937|0.07228|0.02828|NA	1.07625	0.11324	10.5217
Q06210	221	GFPT1	GFPT1_HUMAN Glutamine--fructose-6-phosphate aminotransferase [isomerizing] 1 OS=Homo sapiens OX=9606 GN=GFPT1 PE=1 SV=3	1.27	1.09	0.9	1.045	NA|0.01732|0.06506|0.0495	1.07625	0.1525	14.1696
Q12849	466	GRSF1	GRSF1_HUMAN G-rich sequence factor 1 OS=Homo sapiens OX=9606 GN=GRSF1 PE=1 SV=3	0.97			1.18	NA|||NA	1.075	0.14849	13.813
P23919	66	DTYMK	KTHY_HUMAN Thymidylate kinase OS=Homo sapiens OX=9606 GN=DTYMK PE=1 SV=4	1.42		0.73		NA||NA|	1.075	0.4879	45.386
P32322	243	PYCR1	P5CR1_HUMAN Pyrroline-5-carboxylate reductase 1, mitochondrial OS=Homo sapiens OX=9606 GN=PYCR1 PE=1 SV=2	0.97			1.18	NA|||0.08485	1.075	0.14849	13.813
P30419	135	NMT1	NMT1_HUMAN Glycylpeptide N-tetradecanoyltransferase 1 OS=Homo sapiens OX=9606 GN=NMT1 PE=1 SV=2			1.1	1.05	||0.0|NA	1.075	0.03536	3.2893
O43719	405	HTATSF1	HTSF1_HUMAN HIV Tat-specific factor 1 OS=Homo sapiens OX=9606 GN=HTATSF1 PE=1 SV=1	0.93	1.01	1.24	1.115	NA|0.0|NA|0.14849	1.07375	0.13425	12.5029
P54577	466	YARS1	SYYC_HUMAN Tyrosine--tRNA ligase, cytoplasmic OS=Homo sapiens OX=9606 GN=YARS1 PE=1 SV=4	1.2	0.995	1.1	1	NA|0.25198|0.19799|0.0	1.07375	0.09707	9.04028
P62244	44	RPS15A	RS15A_HUMAN 40S ribosomal protein S15a OS=Homo sapiens OX=9606 GN=RPS15A PE=1 SV=2	1.15	1.25	0.965	0.93	NA|0.48204|0.29246|0.22794	1.07375	0.15206	14.1616
Q86SX6	144	GLRX5	GLRX5_HUMAN Glutaredoxin-related protein 5, mitochondrial OS=Homo sapiens OX=9606 GN=GLRX5 PE=1 SV=2	1.07	1.33		0.82	NA|NA||NA	1.07333	0.25502	23.7597
Q4VCS5	693	AMOT	AMOT_HUMAN Angiomotin OS=Homo sapiens OX=9606 GN=AMOT PE=1 SV=1	1.15		1.04	1.03	NA||NA|NA	1.07333	0.06658	6.20312
Q9NQ29	63	LUC7L	LUC7L_HUMAN Putative RNA-binding protein Luc7-like 1 OS=Homo sapiens OX=9606 GN=LUC7L PE=1 SV=1	1.4	1.08	1.01	0.8	NA|0.09074|NA|0.21213	1.0725	0.24865	23.1841
P51659	120	HSD17B4	DHB4_HUMAN Peroxisomal multifunctional enzyme type 2 OS=Homo sapiens OX=9606 GN=HSD17B4 PE=1 SV=3	1.26	1.17	0.7	1.16	0.30093|0.07071|0.05196|0.0955	1.0725	0.25237	23.531
P30101	309	PDIA3	PDIA3_HUMAN Protein disulfide-isomerase A3 OS=Homo sapiens OX=9606 GN=PDIA3 PE=1 SV=4	1.52	1.33	0.84	0.6	0.0|NA|0.0|0.04899	1.0725	0.42578	39.6998
P16949	129	STMN1	STMN1_HUMAN Stathmin OS=Homo sapiens OX=9606 GN=STMN1 PE=1 SV=3		0.905	1.24		|0.17678|NA|	1.0725	0.23688	22.0867
P46779	45	RPL28	RL28_HUMAN 60S ribosomal protein L28 OS=Homo sapiens OX=9606 GN=RPL28 PE=1 SV=3	1.145	1.04		1.03	0.17678|0.25325||0.12681	1.07167	0.06371	5.94493
Q92530	143	PSMF1	PSMF1_HUMAN Proteasome inhibitor PI31 subunit OS=Homo sapiens OX=9606 GN=PSMF1 PE=1 SV=2	0.525		0.97	1.72	0.12021||0.14742|NA	1.07167	0.60395	56.356
Q12905	323	ILF2	ILF2_HUMAN Interleukin enhancer-binding factor 2 OS=Homo sapiens OX=9606 GN=ILF2 PE=1 SV=2	1.48	0.9		0.83	NA|0.35572||NA	1.07	0.35679	33.3449
Q96SZ6	356	CDK5RAP1	CK5P1_HUMAN Mitochondrial tRNA methylthiotransferase CDK5RAP1 OS=Homo sapiens OX=9606 GN=CDK5RAP1 PE=1 SV=2	1.07				NA|||	1.07	NA	#VALUE!
Q9Y6G9	337	DYNC1LI1	DC1L1_HUMAN Cytoplasmic dynein 1 light intermediate chain 1 OS=Homo sapiens OX=9606 GN=DYNC1LI1 PE=1 SV=3	1.09			1.05	NA|||0.07071	1.07	0.02828	2.64299
P08670	238	VIM	VIME_HUMAN Vimentin OS=Homo sapiens OX=9606 GN=VIM PE=1 SV=4	0.96	1.49	0.76		NA|NA|NA|	1.07	0.37723	35.2551
P13797	304	PLS3	PLST_HUMAN Plastin-3 OS=Homo sapiens OX=9606 GN=PLS3 PE=1 SV=4	1.07				NA|||	1.07	NA	#VALUE!
Q9UN86	62	G3BP2	G3BP2_HUMAN Ras GTPase-activating protein-binding protein 2 OS=Homo sapiens OX=9606 GN=G3BP2 PE=1 SV=2		1.07			|NA||	1.07	NA	#VALUE!
P61962	173	DCAF7	DCAF7_HUMAN DDB1- and CUL4-associated factor 7 OS=Homo sapiens OX=9606 GN=DCAF7 PE=1 SV=1		1.07			|NA||	1.07	NA	#VALUE!
P28288	36	ABCD3	ABCD3_HUMAN ATP-binding cassette sub-family D member 3 OS=Homo sapiens OX=9606 GN=ABCD3 PE=1 SV=1		1.07			|NA||	1.07	NA	#VALUE!
Q96RP9	539	GFM1	EFGM_HUMAN Elongation factor G, mitochondrial OS=Homo sapiens OX=9606 GN=GFM1 PE=1 SV=2		1.07			|NA||	1.07	NA	#VALUE!
Q9Y5A9	424	YTHDF2	YTHD2_HUMAN YTH domain-containing family protein 2 OS=Homo sapiens OX=9606 GN=YTHDF2 PE=1 SV=2			1.07		||0.0|	1.07	NA	#VALUE!
P43243	244	MATR3	MATR3_HUMAN Matrin-3 OS=Homo sapiens OX=9606 GN=MATR3 PE=1 SV=2			1.07		||NA|	1.07	NA	#VALUE!
P34897	504	SHMT2	GLYM_HUMAN Serine hydroxymethyltransferase, mitochondrial OS=Homo sapiens OX=9606 GN=SHMT2 PE=1 SV=3			1.07		||NA|	1.07	NA	#VALUE!
P47914	7	RPL29	RL29_HUMAN 60S ribosomal protein L29 OS=Homo sapiens OX=9606 GN=RPL29 PE=1 SV=2				1.07	|||NA	1.07	NA	#VALUE!
Q8IU81	59	IRF2BP1	I2BP1_HUMAN Interferon regulatory factor 2-binding protein 1 OS=Homo sapiens OX=9606 GN=IRF2BP1 PE=1 SV=1				1.07	|||NA	1.07	NA	#VALUE!
Q14168	204	MPP2	MPP2_HUMAN MAGUK p55 subfamily member 2 OS=Homo sapiens OX=9606 GN=MPP2 PE=1 SV=3				1.07	|||NA	1.07	NA	#VALUE!
P21333	2058	FLNA	FLNA_HUMAN Filamin-A OS=Homo sapiens OX=9606 GN=FLNA PE=1 SV=4				1.07	|||NA	1.07	NA	#VALUE!
O14737	21	PDCD5	PDCD5_HUMAN Programmed cell death protein 5 OS=Homo sapiens OX=9606 GN=PDCD5 PE=1 SV=3	0.99	1.54	0.75	0.99	0.07071|0.14012|NA|0.05657	1.0675	0.3347	31.3536
P35579	1194	MYH9	MYH9_HUMAN Myosin-9 OS=Homo sapiens OX=9606 GN=MYH9 PE=1 SV=4	1.19	1.15	1.01	0.92	0.2687|0.43131|0.20712|0.24282	1.0675	0.125	11.7096
Q53H12	89	AGK	AGK_HUMAN Acylglycerol kinase, mitochondrial OS=Homo sapiens OX=9606 GN=AGK PE=1 SV=2	1.165	0.97			0.33234|NA||	1.0675	0.13789	12.9171
P45954	338	ACADSB	ACDSB_HUMAN Short/branched chain specific acyl-CoA dehydrogenase, mitochondrial OS=Homo sapiens OX=9606 GN=ACADSB PE=1 SV=1	1.1	1.23	0.975	0.965	0.24042|0.12124|0.0495|0.02121	1.0675	0.12453	11.6656
Q9NZ01	153	TECR	TECR_HUMAN Very-long-chain enoyl-CoA reductase OS=Homo sapiens OX=9606 GN=TECR PE=1 SV=1		1.3		0.835	|NA||0.05831	1.0675	0.3288	30.8009
P18583	953	SON	SON_HUMAN Protein SON OS=Homo sapiens OX=9606 GN=SON PE=1 SV=4	0.92		0.97	1.31	0.14572||NA|0.16166	1.06667	0.21221	19.8946
P18583	932	SON	SON_HUMAN Protein SON OS=Homo sapiens OX=9606 GN=SON PE=1 SV=4	0.92		0.97	1.31	0.14572||NA|0.16166	1.06667	0.21221	19.8946
P07197	183	NEFM	NFM_HUMAN Neurofilament medium polypeptide OS=Homo sapiens OX=9606 GN=NEFM PE=1 SV=3	0.93	1.26	1.01		NA|NA|NA|	1.06667	0.17214	16.1381
P42167	267	TMPO	LAP2B_HUMAN Lamina-associated polypeptide 2, isoforms beta/gamma OS=Homo sapiens OX=9606 GN=TMPO PE=1 SV=2		0.95	1.06	1.19	|NA|NA|NA	1.06667	0.12014	11.2631
Q96EY4	95	TMA16	TMA16_HUMAN Translation machinery-associated protein 16 OS=Homo sapiens OX=9606 GN=TMA16 PE=1 SV=2	1.18	1.04	1.17	0.875	NA|0.02828|NA|0.16263	1.06625	0.14256	13.3702
P61313	182	RPL15	RL15_HUMAN 60S ribosomal protein L15 OS=Homo sapiens OX=9606 GN=RPL15 PE=1 SV=2	0.79	0.44	1.53	1.5	0.27592|0.21031|0.28626|0.22003	1.065	0.53904	50.6141
P53396	1072	ACLY	ACLY_HUMAN ATP-citrate synthase OS=Homo sapiens OX=9606 GN=ACLY PE=1 SV=3	1.19			0.94	0.01414|||NA	1.065	0.17678	16.5991
O15067	146	PFAS	PUR4_HUMAN Phosphoribosylformylglycinamidine synthase OS=Homo sapiens OX=9606 GN=PFAS PE=1 SV=4	1.36	0.95	0.98	0.97	0.33938|0.02887|0.01414|0.15156	1.065	0.19706	18.5033
O00303	95	EIF3F	EIF3F_HUMAN Eukaryotic translation initiation factor 3 subunit F OS=Homo sapiens OX=9606 GN=EIF3F PE=1 SV=1	1.08	0.98	1.27	0.93	NA|NA|0.3371|0.14526	1.065	0.15022	14.1052
P15374	153	UCHL3	UCHL3_HUMAN Ubiquitin carboxyl-terminal hydrolase isozyme L3 OS=Homo sapiens OX=9606 GN=UCHL3 PE=1 SV=1		1.03	1.1		|NA|NA|	1.065	0.0495	4.64789
Q9Y6Y8	380	SEC23IP	S23IP_HUMAN SEC23-interacting protein OS=Homo sapiens OX=9606 GN=SEC23IP PE=1 SV=1		1.16		0.97	|NA||NA	1.065	0.13435	12.615
P35580	197	MYH10	MYH10_HUMAN Myosin-10 OS=Homo sapiens OX=9606 GN=MYH10 PE=1 SV=3			1.2	0.93	||0.16442|NA	1.065	0.19092	17.9268
P61970	124	NUTF2	NTF2_HUMAN Nuclear transport factor 2 OS=Homo sapiens OX=9606 GN=NUTF2 PE=1 SV=1	0.94	0.89	1.455	0.965	0.13351|0.1721|0.65761|0.09192	1.0625	0.26352	24.8019
Q00610	1088	CLTC	CLH1_HUMAN Clathrin heavy chain 1 OS=Homo sapiens OX=9606 GN=CLTC PE=1 SV=5	1.09	1.185	0.805	1.17	0.13719|0.0495|0.292|0.15695	1.0625	0.17666	16.6268
Q92499	442	DDX1	DDX1_HUMAN ATP-dependent RNA helicase DDX1 OS=Homo sapiens OX=9606 GN=DDX1 PE=1 SV=2	0.875		1.14	1.17	0.2192||0.12702|0.13204	1.06167	0.16235	15.2919
Q96F86	506	EDC3	EDC3_HUMAN Enhancer of mRNA-decapping protein 3 OS=Homo sapiens OX=9606 GN=EDC3 PE=1 SV=1	0.87	1.57	0.94	0.865	NA|NA|NA|0.12021	1.06125	0.34089	32.1216
P23246	255	SFPQ	SFPQ_HUMAN Splicing factor, proline- and glutamine-rich OS=Homo sapiens OX=9606 GN=SFPQ PE=1 SV=2	1.08	0.48	1.245	1.435	NA|NA|0.47819|0.27577	1.06	0.41298	38.9604
P11908	193	PRPS2	PRPS2_HUMAN Ribose-phosphate pyrophosphokinase 2 OS=Homo sapiens OX=9606 GN=PRPS2 PE=1 SV=2	1.01	1.33		0.84	0.0|NA||0.0	1.06	0.2488	23.4717
P62861	3	FAU	RS30_HUMAN 40S ribosomal protein S30 OS=Homo sapiens OX=9606 GN=FAU PE=1 SV=1		1.06			|NA||	1.06	NA	#VALUE!
Q9Y606	246	PUS1	TRUA_HUMAN tRNA pseudouridine synthase A OS=Homo sapiens OX=9606 GN=PUS1 PE=1 SV=3		1.06			|NA||	1.06	NA	#VALUE!
P14635	320	CCNB1	CCNB1_HUMAN G2/mitotic-specific cyclin-B1 OS=Homo sapiens OX=9606 GN=CCNB1 PE=1 SV=1		1.06			|NA||	1.06	NA	#VALUE!
P49589	157	CARS1	SYCC_HUMAN Cysteine--tRNA ligase, cytoplasmic OS=Homo sapiens OX=9606 GN=CARS1 PE=1 SV=3		1.16		0.96	|0.42426||NA	1.06	0.14142	13.3415
Q96CB9	218	NSUN4	NSUN4_HUMAN 5-methylcytosine rRNA methyltransferase NSUN4 OS=Homo sapiens OX=9606 GN=NSUN4 PE=1 SV=2		1.06			|NA||	1.06	NA	#VALUE!
O15344	169	MID1	TRI18_HUMAN E3 ubiquitin-protein ligase Midline-1 OS=Homo sapiens OX=9606 GN=MID1 PE=1 SV=1		1.06			|NA||	1.06	NA	#VALUE!
P09874	934	PARP1	PARP1_HUMAN Poly [ADP-ribose] polymerase 1 OS=Homo sapiens OX=9606 GN=PARP1 PE=1 SV=4			1.06		||NA|	1.06	NA	#VALUE!
Q69YQ0	597	SPECC1L	CYTSA_HUMAN Cytospin-A OS=Homo sapiens OX=9606 GN=SPECC1L PE=1 SV=2			1.08	1.04	||NA|NA	1.06	0.02828	2.66792
P31689	211	DNAJA1	DNJA1_HUMAN DnaJ homolog subfamily A member 1 OS=Homo sapiens OX=9606 GN=DNAJA1 PE=1 SV=2			1.06		||NA|	1.06	NA	#VALUE!
P78527	2670	PRKDC	PRKDC_HUMAN DNA-dependent protein kinase catalytic subunit OS=Homo sapiens OX=9606 GN=PRKDC PE=1 SV=3			1.06		||0.18385|	1.06	NA	#VALUE!
Q93008	595	USP9X	USP9X_HUMAN Probable ubiquitin carboxyl-terminal hydrolase FAF-X OS=Homo sapiens OX=9606 GN=USP9X PE=1 SV=4				1.06	|||NA	1.06	NA	#VALUE!
Q8N1G4	578	LRRC47	LRC47_HUMAN Leucine-rich repeat-containing protein 47 OS=Homo sapiens OX=9606 GN=LRRC47 PE=1 SV=1				1.06	|||0.01414	1.06	NA	#VALUE!
Q9H9B4	27	SFXN1	SFXN1_HUMAN Sideroflexin-1 OS=Homo sapiens OX=9606 GN=SFXN1 PE=1 SV=4	1.055	1.25	1.01	0.92	0.21191|0.14842|0.1193|0.12765	1.05875	0.13931	13.158
P26599	236	PTBP1	PTBP1_HUMAN Polypyrimidine tract-binding protein 1 OS=Homo sapiens OX=9606 GN=PTBP1 PE=1 SV=1	0.785	1.17	1.22		0.16153|NA|0.21354|	1.05833	0.23803	22.4911
O75643	364	SNRNP200	U520_HUMAN U5 small nuclear ribonucleoprotein 200 kDa helicase OS=Homo sapiens OX=9606 GN=SNRNP200 PE=1 SV=2	1.105	1.13	0.93	1.065	0.16052|0.11846|0.17039|0.03536	1.0575	0.08912	8.42742
Q06124	287	PTPN11	PTN11_HUMAN Tyrosine-protein phosphatase non-receptor type 11 OS=Homo sapiens OX=9606 GN=PTPN11 PE=1 SV=3	1.21	0.77	1.1	1.15	0.45255|NA|0.30022|NA	1.0575	0.19687	18.6165
Q9Y262	281	EIF3L	EIF3L_HUMAN Eukaryotic translation initiation factor 3 subunit L OS=Homo sapiens OX=9606 GN=EIF3L PE=1 SV=1		0.82	0.95	1.4	|0.0|0.11325|0.23094	1.05667	0.30436	28.8037
Q7Z4S6	463	KIF21A	KI21A_HUMAN Kinesin-like protein KIF21A OS=Homo sapiens OX=9606 GN=KIF21A PE=1 SV=2	1.27	0.905	0.99	1.06	0.05774|0.27577|0.12728|0.28284	1.05625	0.15596	14.7654
Q12906	305	ILF3	ILF3_HUMAN Interleukin enhancer-binding factor 3 OS=Homo sapiens OX=9606 GN=ILF3 PE=1 SV=3	1.12	1.13	1.01	0.96	0.48101|0.23523|0.0863|0.08187	1.055	0.08347	7.91185
Q9UNH7	154	SNX6	SNX6_HUMAN Sorting nexin-6 OS=Homo sapiens OX=9606 GN=SNX6 PE=1 SV=1	1.02	1.06	1.19	0.95	NA|NA|NA|NA	1.055	0.10083	9.55735
P47755	52	CAPZA2	CAZA2_HUMAN F-actin-capping protein subunit alpha-2 OS=Homo sapiens OX=9606 GN=CAPZA2 PE=1 SV=3	0.86	1.25			NA|0.11314||	1.055	0.27577	26.1393
Q6ZN08	503	ZNF66	ZNF66_HUMAN Putative zinc finger protein 66 OS=Homo sapiens OX=9606 GN=ZNF66 PE=5 SV=3		1.1	1.01		|NA|NA|	1.055	0.06364	6.03223
Q9HCC0	57	MCCC2	MCCB_HUMAN Methylcrotonoyl-CoA carboxylase beta chain, mitochondrial OS=Homo sapiens OX=9606 GN=MCCC2 PE=1 SV=1		1.21	1.135	0.82	|0.15556|0.14849|0.065	1.055	0.20694	19.6152
Q16822	239	PCK2	PCKGM_HUMAN Phosphoenolpyruvate carboxykinase [GTP], mitochondrial OS=Homo sapiens OX=9606 GN=PCK2 PE=1 SV=4		1.055			|0.00707||	1.055	NA	#VALUE!
Q9NSD9	512	FARSB	SYFB_HUMAN Phenylalanine--tRNA ligase beta subunit OS=Homo sapiens OX=9606 GN=FARSB PE=1 SV=3		1.11	1.035	1.02	|0.14612|0.24749|0.3079	1.055	0.04822	4.57062
P19784	292	CSNK2A2	CSK22_HUMAN Casein kinase II subunit alpha' OS=Homo sapiens OX=9606 GN=CSNK2A2 PE=1 SV=1			1.15	0.96	||NA|NA	1.055	0.13435	12.7346
P22314	548	UBA1	UBA1_HUMAN Ubiquitin-like modifier-activating enzyme 1 OS=Homo sapiens OX=9606 GN=UBA1 PE=1 SV=3	0.99	1.26		0.91	0.06|NA||NA	1.05333	0.18339	17.4105
Q9UKF6	684	CPSF3	CPSF3_HUMAN Cleavage and polyadenylation specificity factor subunit 3 OS=Homo sapiens OX=9606 GN=CPSF3 PE=1 SV=1	1.04	1.08		1.04	NA|0.02517||0.0	1.05333	0.02309	2.1921
P27635	130	RPL10	RL10_HUMAN 60S ribosomal protein L10 OS=Homo sapiens OX=9606 GN=RPL10 PE=1 SV=4	1.02	1.13	1.05	1.01	0.11971|0.02517|NA|0.27142	1.0525	0.05439	5.1677
[truncated: 2,262 more rows]

## Sheet: Heat-sensitive
Leading AC	Site	Genename	Description	All ratio repeat1	All ratio repeat2	All ratio repeat3	All ratio repeat4	All SD Ratio	Ratio average	Ratio SD	CV
[truncated: 530 more rows]
