# Supplementary material
Source: Research Square preprint supplement (doi:10.21203/rs.3.rs-5177030/v1)
Supplement: Supplementary file 5 [file 788e18fe1b4aabfaaf9f4134.xlsx]

## Sheet: Legend
Supplementary Data 1. Summary of pChem search results. The tailored, pChem-based pipeline was used to evaluate 7 covalent probes built upon classic residue-specific bioconjugation chemistries. Specifically, lysates of HEK293T cells were labeled with each probe at the indicated conditions, processed into tryptic peptides, and clicked with isotope tags. The resulting mixtures were directly subjecte…

## Sheet: Supplementary Data1
Probe	Localization probability																				#PSMs mod	#All PSMs	% Mod	p.p.m	Accurate Mass	RAW Data	Notes
	A	C	D/E	F	G	H	I	K	L	M	N/Q	P	R	S	T	V	W	Y	NTERM	CTERM
IPM	0	0.983	0	0	0	0	0	0	0	0	0	0	0	0	0	0	0	0	0	0	133	84019	0.158298	3.05011	252.123	HFX_YangJing_HJX_IPM-10_20240416_F1_R1.raw	probe at the concentration of 10 μM with isotope-tags
IPM	0	0.972	0	0	0	0	0	0	0	0	0	0	0	0	0	0	0	0	0	0	1016	82659	1.22915	3.1572	252.123	HFX_YangJing_HJX_IPM-100_20240416_F1_R1.raw	probe at the concentration of 100 μM with isotope-tags
IPM	0	0.889	0	0	0	0	0	0	0	0	0	0	0	0	0	0	0	0	0.11	0	2524	77107	3.27337	3.54987	252.123	HFX_YangJing_HJX_IPM-1000_20240416_F1_R1.raw	probe at the concentration of 1000 μM with isotope-tags
ENE	0	0.507	0	0	0	0.084	0	0	0	0	0	0	0	0	0	0	0	0	0.189	0	829	64790	1.27952	1.77677	279.159	HFX_YangJing_HJX_ENE-1000_20240508_F1_R1.raw	probe at the concentration of 1000 μM with isotope-tags
NPM	0	0.859	0	0	0	0	0	0	0	0	0	0	0	0	0	0	0	0	0.113	0	859	63971	1.3428	1.26077	310.128	HFX_YangJing_HJX_NPM-1000_20240508_F1_R1.raw	probe at the concentration of 1000 μM with isotope-tags
PPMS	0	0.987	0	0	0	0	0	0	0	0	0	0	0	0	0	0	0	0	0	0	734	71274	1.02983	0.836736	227.073	HFX_YangJing_HJX_PPMS-1000_20240508_F1_R1.raw	probe at the concentration of 1000 μM with isotope-tags
VSF	0	0.891	0	0	0	0	0	0	0	0	0	0	0	0	0	0	0	0	0.134	0	1294	63706	2.03121	1.54542	315.126	HFX_YangJing_HJX_VSF-1000_20240508_F1_R1.raw	probe at the concentration of 1000 μM with isotope-tags
STP	0	0	0	0	0	0	0	0.827	0	0	0	0	0	0	0	0	0	0	0	0	4560	60212	7.57324	0.354264	237.111	HFX_YangJing_HJX_STP-1000_20240508_F1_R1.raw	probe at the concentration of 1000 μM with isotope-tags
NHS	0	0	0	0	0	0	0	0.804	0	0	0	0	0	0	0	0	0	0	0.093	0	3187	58691	5.43013	2.35339	251.128	HFX_YangJing_HJX_NHS-1000_20240508_F1_R1.raw	probe at the concentration of 1000 μM with isotope-tags
