# Supplementary material
Source: Research Square preprint supplement (doi:10.21203/rs.3.rs-5177030/v1)
Supplement: Supplementary file 6 [file 8755d95cab6acea2046e5d00.xlsx]

## Sheet: Legend
Supplementary Data 2. Summary of pIon search results. For IPM, a classic cysteine-specific probe, lysates of HEK293T cells were labeled with IPM at different conditions as indicated, processed into tryptic peptides, and clicked with DMP-tag via CuAAC using each ligand as indicated. The resulting mixtures were directly subjected to LC-MS/MS analysis under different instrumental settings (i.e., iso…

## Sheet: Supplementary Data2
Probe	SMILES	Localization probability																				#PSMs mod	#All PSMs	% Mod	p.p.m	Accurate Mass	RAW Data	Notes
		A	C	D/E	F	G	H	I	K	L	M	N/Q	P	R	S	T	V	W	Y	NTERM	CTERM
IPM	ICC(NCC#C)=O	0	0.95	0	0	0	0	0	0	0	0	0	0	0	0	0	0	0	0	0	0	20	58153	0.034392	0.173543	334.212	Fusion3_YangJing_FanYouLong_IPM-4_OTOT_50per_20230526_F1_R1.raw	probe at the concentration of 1 μM
IPM	ICC(NCC#C)=O	0	0.922	0	0	0	0	0	0	0	0	0	0	0	0	0	0	0	0	0	0	308	60693	0.507472	0.176535	334.212	Fusion3_YangJing_FanYouLong_IPM-5_OTOT_50per_20230526_F1_R1.raw	probe at the concentration of 10 μM
IPM	ICC(NCC#C)=O	0	0.911	0	0	0	0	0	0	0	0	0	0	0	0	0	0	0	0	0	0	1960	59142	3.31406	0.496691	334.212	Fusion3_YangJing_FanYouLong_IPM-6_OTOT_50per_20230526_F1_R1.raw	probe at the concentration of 100 μM
IPM	ICC(NCC#C)=O	0	0.917	0	0	0	0	0	0	0	0	0	0	0	0	0	0	0	0	0.087	0	2751	58821	4.6769	0.709131	334.211	Fusion3_YangJing_FanYouLong_IPM-7_OTOT_50per_20230526_F1_R1.raw	probe at the concentration of 1 mM
IPM	ICC(NCC#C)=O	0	0.757	0	0	0	0	0	0	0	0	0	0	0	0	0	0	0	0	0.077	0	2589	57981	4.46526	1.19984	334.212	HFX_YangJing_HJX_IPM-NCE21_20240511_F1_R1.raw	NCE21
IPM	ICC(NCC#C)=O	0	0.829	0	0	0	0	0	0	0	0	0	0	0	0	0	0	0	0	0.09	0	3272	64331	5.08619	0.89165	334.212	HFX_YangJing_HJX_IPM-NCE24_20240511_F1_R1.raw	NCE24
IPM	ICC(NCC#C)=O	0	0.866	0	0	0	0	0	0	0	0	0	0	0	0	0	0	0	0	0	0	3167	60239	5.25739	0.849761	334.212	HFX_YangJing_HJX_IPM-NCE27_20240511_F1_R1.raw	NCE27
IPM	ICC(NCC#C)=O	0	0.871	0	0	0	0	0	0	0	0	0	0	0	0	0	0	0	0	0.086	0	2877	62742	4.58545	1.34944	334.212	HFX_YangJing_HJX_IPM-NCE30_20240511_F1_R1.raw	NCE30
IPM	ICC(NCC#C)=O	0	0.863	0	0	0	0	0	0	0	0	0	0	0	0	0	0	0	0	0.085	0	2152	52502	4.09889	1.53795	334.212	HFX_YangJing_HJX_IPM-NCE33_20240511_F1_R1.raw	NCE33
IPM	ICC(NCC#C)=O	0	0.855	0	0	0	0	0	0	0	0	0	0	0	0	0	0	0	0	0.099	0	2844	82118	3.46331	0.957477	334.212	HFX_YangJing_HJX_IPM-IW07_20230808_F1_R1.raw	IW0.7
IPM	ICC(NCC#C)=O	0	0.84	0	0	0	0	0	0	0	0	0	0	0	0	0	0	0	0	0.097	0	2954	94691	3.11962	1.05023	334.212	HFX_YangJing_HJX_IPM-IW16_20230808_F1_R1.raw	IW1.6
IPM	ICC(NCC#C)=O	0	0.827	0	0	0	0	0	0	0	0	0	0	0	0	0	0	0	0	0.1	0	2705	98184	2.75503	1.13401	334.212	HFX_YangJing_HJX_IPM-IW20_20230808_F1_R1.raw	IW2.0
IPM	ICC(NCC#C)=O	0	0.874	0	0	0	0	0	0	0	0	0	0	0	0	0	0	0	0	0.088	0	4043	92674	4.3626	0.191495	334.212	HFX_YangJing_HeJiXiang_IPM_20230701_F1_R1.raw	HFX
IPM	ICC(NCC#C)=O	0	0.918	0	0	0	0	0	0	0	0	0	0	0	0	0	0	0	0	0.086	0	2752	58840	4.67709	0.715116	334.211	Fusion3_YangJing_FanYouLong_IPM-7_OTOT_50per_20230526_F1_R1.raw	Fusion
IPM	ICC(NCC#C)=O	0	0.9	0	0	0	0	0	0	0	0	0	0	0	0	0	0	0	0	0	0	1025	26602	3.85309	0.66425	334.211	Lumos_YangJ_HJX_IPM-7_20231108.raw	lusmos
IPM	ICC(NCC#C)=O	0	0.854	0	0	0	0	0	0	0	0	0	0	0	0	0	0	0	0	0.209	0	103	17402	0.591886	0.66425	334.208	YangJing_HJX_IPM-7_5uL_20230719.wiff.scan	5600
IPM	ICC(NCC#C)=O	0	0.894	0	0	0	0	0	0	0	0	0	0	0	0	0	0	0	0	0.082	0	5379	80719	6.66386	0.652281	334.212	FAIMS_480_DDA_75um_300nL_Yangjing_HJX_75min_20230704_R1.raw	480
IPM	ICC(NCC#C)=O	0	0.863	0	0	0	0	0	0	0	0	0	0	0	0	0	0	0	0	0.108	0	1912	50019	3.82255	0.673226	334.212	HFX_YangJing_HJX_THPTA_20221201_F1_R1.raw	THPTA
IPM	ICC(NCC#C)=O	0	0.884	0	0	0	0	0	0	0	0	0	0	0	0	0	0	0	0	0.102	0	1636	47378	3.45308	0.966453	334.212	HFX_YangJing_HJX_TBTA_20221201_F1_R1.raw	TBTA
IPM	ICC(NCC#C)=O	0	0.866	0	0	0	0	0	0	0	0	0	0	0	0	0	0	0	0	0.103	0	1569	44676	3.51195	0.140629	334.212	HFX_YangJing_HJX_BTTAA_20221201_F1_R1.raw	BTTAA
IPM	ICC(NCC#C)=O	0	0.861	0	0	0	0	0	0	0	0	0	0	0	0	0	0	0	0	0.098	0	1543	46514	3.31728	0.685194	334.212	HFX_YangJing_HJX_BTTES_20221201_F1_R1.raw	BTTES
IPM	ICC(NCC#C)=O	0	0.877	0	0	0	0	0	0	0	0	0	0	0	0	0	0	0	0	0.09	0	1642	43080	3.81151	0.242361	334.212	HFX_YangJing_HJX_BTTP_20221201_F1_R1.raw	BTTP
IPM	ICC(NCC#C)=O	0	0.874	0	0	0	0	0	0	0	0	0	0	0	0	0	0	0	0	0.088	0	4049	92674	4.36908	0.191495	334.212	HFX_YangJing_HeJiXiang_IPM_20230701_F1_R1.raw	probe at the concentration of 1mM
ENE	ICC(NCC#C)=O	0	0.553	0	0	0	0.031	0	0	0	0	0	0	0	0	0	0	0	0	0.227	0	5039	87168	5.78079	0.044291	361.248	HFX_YangJing_HeJiXiang_ENE_20230701_F1_R1.raw	probe at the concentration of 1mM
NPM	O=C(C=C1)N(CC#C)C1=O	0	0.825	0	0	0	0	0	0	0	0	0	0	0	0	0	0	0	0	0.093	0	3558	82896	4.29213	0.316151	392.217	HFX_YangJing_HeJiXiang_NPM_20230701_F1_R1.raw	probe at the concentration of 1mM
PPMS	C=CS(CCCC#C)(=O)=O	0	0.862	0	0	0	0	0	0	0	0	0	0	0	0	0	0	0	0	0.078	0	6070	91015	6.66923	1.5914	309.162	HFX_YangJing_HeJiXiang_PPMS_20230701_F1_R1.raw	probe at the concentration of 1mM
VSF	O=S(C)(SCC#C)=O	0	0.839	0	0	0	0	0	0	0	0	0	0	0	0	0	0	0	0	0.096	0	3846	90486	4.25038	0.219025	397.215	HFX_YangJing_HeJiXiang_VSF_20230701_F1_R1.raw	probe at the concentration of 1mM
STP	[NaO3S]C1=C(F)C(F)=C(OC(CCC#C)=O)C(F)=C1F	0	0.022	0	0	0	0	0	0.628	0	0	0	0	0	0	0	0	0	0	0	0	3066	89860	3.41197	0.269423	319.201	HFX_YangJing_HJX_STP_20230808_F1_R1.raw	probe at the concentration of 1mM
NHS	O=C(CC1)N(OC(CCCC#C)=O)C1=O	0	0.017	0	0	0	0	0	0.721	0	0	0	0	0	0	0	0	0	0	0	0	6148	82445	7.45709	1.84865	333.217	HFX_YangJing_HeJiXiang_NHS_20230701_F1_R1.raw	probe at the concentration of 1mM
1	CC1(C)CC(OCC#C)CC(C)(C)N1[O]	0	0	0	0	0	0	0	0.701	0	0	0	0	0	0	0	0	0	0	0	0	224	55935	0.400465	1.58	397.212	HFX_YangJing_HJX_C2_20240104_F1_R1.raw	Rose Bengal (RB)，LED (10 W), 30℃, LED (10 W) ，1 h，CH3CN/H2O (4:1)
2	OB(O)/C=C/C1=CC=C(CNC(CCCC#C)=O)C=C1	0	0	0	0	0	0	0	0.739	0	0	0	0	0	0	0	0	0	0	0	0	23	28295	0.0812864	0.73	437.217	HFX_YangJing_HJX_C4_20240104_F1_R1.raw	365 nm UV light, 25 °C, 30 min,PBS/MeOH (2:1, pH = 7.4)
3	OB(O)/C=C/C1=CC=C(CNC(CN=[N+]=[N-])=O)C=C1	0	0.831	0	0	0	0	0	0	0	0	0	0	0	0	0	0	0	0	0.18	0	367	42754	0.858399	1.58	416.345	HFX_YangJing_HJX_C9-1_20240104_F1_R1.raw	TCEP(5 mM), Mn(OAc)3 (1 mM)，6 M guanidine hydrochloride, 100 mM Na2HPO4, pH 7.2,50℃, 2 h
4	O=C(NO)C1=CC=C(C#C)C=C1	0	0.462	0	0	0	0	0	0	0	0	0	0	0	0	0	0	0	0	0	0	14	29013	0.0482542	0.32092	464.29	Lumos_YangJ_HJX_1A_20240111.raw	NMM buffer (50 mM, 0.2 M NaCl, pH 7.4),CuCl2·2H2O (30 µM)
5	ONCC1=CC=C(OCC#C)C=C1	0	1	0	0	0	0	0	0	0	0	0	0	0	0	0	0	0	0	0	0	5	62809	0.00796064	1.30657	436.258	HFX_YangJing_HJX_1B_20240404_F1_R1.raw	NMM buffer (50 mM, 0.2 M NaCl, pH 7.4),CuCl2·2H2O (30 µM)
6	O=C(NCC#C)C1=CC=C(N2N=C(C3=CC=CC=C3)N=N2)C=C1	0	0	0	0	0	0	0	0.422	0	0	0	0	0	0	0	0	0	0	0.228	0	377	83088	0.453736	0.55	382.212	HFX_YangJing_HJX_M1_20231201_F1_R1.raw	1 mM NaIO4, 4 h, PBS (pH = 7.6),25℃
7	NCCC1(N=N1)CCC#C	0	0.671	0	0	0	0	0	0	0	0	0	0	0	0	0	0	0	0	0	0	2020	78733	2.56563	1.53	412.223	HFX_YangJing_HJX_W1_20231201_F1_R1.raw	TIFA (1mM),15 min，37℃
8	ClC1=CC(NC(CCC#C)=O)=[N+](C)C=C1.O=S([O-])(C(F)(F)F)=O	0	0	0.634	0	0	0	0	0	0	0	0	0	0	0	0	0	0	0	0.163	0	301	74553	0.40374	0.540562	514.28	HFX_YangJing_HJX_T24_20231201_F1_R1.raw	365 nm, 20 min, 37℃
9	C[N+]1=CC=C(OC(C2=CC=C(OCC#C)C=C2)=O)C=C1.O=S([O-])(C(F)(F)F)=O	0	0	0.875	0	0	0	0	0	0	0	0	0	0	0	0	0	0	0	0	0	16	76930	0.0207981	1.60798	348.264	HFX_YangJing_HJX_DIA_20231201_F1_R1.raw	302 nm, 4 h, 37℃
10	ClC1=NC(NCC#C)=NC(Cl)=N1	0	0.619	0	0	0	0	0	0	0	0	0	0	0	0	0	0	0	0	0	0	139	43968	0.316139	0.07	425.254	HFX_YangJing_FanYouLong_L1_20240103_F1_R1.raw
11	FS(=O)(C1=CC=C(C#C)C=C1)=O	0	0.298	0	0	0	0	0	0.411	0	0	0	0	0	0	0	0	0	0.108	0.114	0	1791	41613	4.30394	0.571483	397.212	HFX_YangJing_FanYouLong_L2_20240103_F1_R1.raw
12	C#CCOC(C=C1)=CC(C=O)=C1C#C	0	0.19	0	0	0	0	0	0.44	0	0	0	0	0	0	0	0	0	0.047	0.138	0	1693	86710	1.95249	1.67333	405.18	HFX_YangJing_HeJiXiang_A2_20230701_F1_R1.raw
13	O=S(C1=CC=CC=C1)(N(C(CCC#C)=O)CC#N)=O	0	0	0	0	0	0	0	0.152	0	0	0	0	0	0	0	0	0	0.756	0.157	0	394	56297	0.69986	0.808596	403.168	Fusion3_YangJing_FanYouLong_A14_OTOT_20230711_F1_R1.raw
14	O=C1C(OC)=C(NCC#C)C1=O	0	0	0	0	0	0	0	0.712	0	0	0	0	0	0	0	0	0	0	0	0	153	83141	0.184025	2.94877	423.228	HFX_YangJing_HJX_A31_20240416_F1_R1_20240418204258.raw
15	FC1=CC(F)=C(N(C(CCC#C)=O)S(=O)(C)=O)N=C1	0	0.101	0	0	0	0	0	0.584	0	0	0	0	0	0	0	0	0	0	0	0	3510	86355	4.06462	1.0401	319.201	HFX_YangJing_HJX_A32_20240416_F1_R1.raw
16	O=C(NCC#C)N1C=NC=C1	0	0	0	0	0	0	0	0.625	0	0	0	0	0	0	0	0	0	0	0	0	1291	89170	1.4478	0.883955	372.191	HFX_YangJing_HJX_A33_20240416_F1_R1.raw
17	CC1=CC=C(S(N(C)C(OC(CCCCC#C)=O)=C)(=O)=O)C=C1	0	0.094	0	0	0	0	0	0.587	0	0	0	0	0	0	0	0	0	0	0	0	2448	84128	2.90985	1.03696	319.201	HFX_YangJing_HJX_A34_20240416_F1_R1.raw
18	ClC(C=C1)=CC=C1N=C=NC2=CC=C(OCC#C)C=C2	0	0	0	0	0	0	0	0.543	0	0	0	0	0	0	0	0	0	0	0.132	0	2602	97569	2.66683	1.07747	320.196	HFX_YangJing_HeJiXiang_A9_20230701_F1_R1.raw
19	C#CCOC(C=C1)=CC=C1N=C=NCCCC	0	0.337	0	0	0	0	0	0.349	0	0	0	0	0	0	0	0	0	0	0	0	83	83455	0.0994548	0.262073	347.232	HFX_YangJing_HJX_S6_20230330_F1_R1.raw
20	CCOC(C(CC#C)=C=C(C)C)=O	0	0	0	0	0	0	0	0.274	0	0	0	0	0	0	0	0	0	0.056	0.193	0	751	77749	0.965929	1.56169	521.231	HFX_YangJing_HJX_XJ-5_20230812_F1_R1.raw
21	CCOC(C(CC#C)=C=C(C)C)=O	0	0	0.55	0	0	0	0	0	0	0	0	0	0	0	0	0	0	0	0.125	0	757	67939	1.11423	1.77188	467.302	HFX_YangJing_HJX_XJ-6_20230812_F1_R1.raw
22	O=C1N(C#C)C(C2=CC=C(C#C)C=C21)=O	0	0.903	0	0	0	0	0	0	0	0	0	0	0	0	0	0	0	0	0	0	476	85374	0.557547	2.34858	417.275	HFX_YangJing_HJX_XJ-9_20230812_F1_R1.raw
23	O=C1N(C#C)CC2=CC=C(C#C)C=C21	0	0.75	0	0	0	0	0	0	0	0	0	0	0	0	0	0	0	0	0	0	512	80973	0.63231	5.07287	450.24	HFX_YangJing_HJX_21_20230420_F1_R1.raw
24	CCOC(C(CC#C)=C=NCCCC)=O	0	0	0	0	0	0	0	0.273	0	0	0	0	0	0	0	0	0	0	0.246	0	12	90418	0.0132717	-	393.182	HFX_YangJing_HJX_H4_20230330_F1_R1.raw
25	CCOC(C(CC#C)=C=NC1=CC=CC=C1)=O	0	0.95	0	0	0	0	0	0	0	0	0	0	0	0	0	0	0	0	0	0	60	88826	0.0675478	3.55044	420.229	HFX_YangJing_HJX_24_20230420_F1_R1.raw
26	O=C(C=C=C)NC1=CC=C(C#C)C=C1	0	0.8	0	0	0	0	0	0	0	0	0	0	0	0	0	0	0	0	0	0	5	85481	0.00584925	-	401.243	HFX_YangJing_HJX_XJ-2_20230812_F1_R1.raw
27	C#CCCC(O/C(C)=C/C(C1=CC=CC=C1)=O)=O	0	1	0	0	0	0	0	0	0	0	0	0	0	0	0	0	0	0	0	0	6	84385	0.00711027	-	401.245	HFX_YangJing_HJX_XJ-3_20230812_F1_R1.raw
28	C#CC(O/C(C)=C/C(C1=CC=CC=C1)=O)=O	0	0.916	0	0	0	0	0	0	0	0	0	0	0	0	0	0	0	0	0.093	0	1466	51794	2.83044	1.77149	422.244	Fusion3_YangJing_FanYouLong_OY-10_OTOT_5per_20230607_F1_R1.raw
29	O=C(O/C(C)=C/C(C(/C=C\C)=C)=O)C1=CC=C(C#C)C=C1	0	0.148	0	0	0	0	0	0.542	0	0	0	0	0	0	0	0	0	0	0	0	635	52507	1.20936	1.09022	319.201	Fusion3_YangJing_FanYouLong_AN-41_OTOT_50per_20230526_F1_R1.raw
30	O=C(CC1=CC=C(C#C)C=C1)O/C(C)=C/C(C2=CC=CC=C2)=O	0	0	0	0	0	0	0	0.787	0	0	0	0	0	0	0	0	0	0	0	0	136	54718	0.248547	2.14995	291.168	Fusion3_YangJing_FanYouLong_AN-46_OTOT_50per_20230526_F1_R1.raw
31	O=C(O/C(C)=C/C(CCCCC)=O)C1=CC=C(C#C)C=C1	0	0.279	0	0	0	0	0	0.454	0	0	0	0	0	0	0	0	0	0	0.133	0	732	54824	1.33518	1.03486	367.201	Fusion3_YangJing_FanYouLong_AN-51_OTOT_50per_20230526_F1_R1.raw
32	C#CCCC(O/C(C)=C/C(CCCCC)=O)=O	0	0.073	0	0	0	0	0	0.62	0	0	0	0	0	0	0	0	0	0	0.132	0	1035	52030	1.98924	0.569231	381.216	Fusion3_YangJing_FanYouLong_AN-63_OTOT_50per_20230526_F1_R1.raw
33	C[N]1=[C+]SC2=CC(OCC#C)=CC=C21.[I-]	0	0.468	0	0	0	0	0	0.277	0	0	0	0	0	0	0	0	0	0	0	0	361	55079	0.655422	1.63398	367.2	Fusion3_YangJing_FanYouLong_AN-71_OTOT_50per_20230526_F1_R1.raw
34	O=C1C(C#CCCCCC#C)=CC(Br)=CO1	0	0.253	0	0	0	0	0	0.456	0	0	0	0	0	0	0	0	0	0	0	0	182	50286	0.36193	6.40662	319.199	Fusion3_YangJing_FanYouLong_AN-72_OTOT_50per_20230526_F1_R1.raw
35	O=C1C(C#CCCCCC#C)=CC(Br)=CO1	0	0.918	0	0	0	0	0	0	0	0	0	0	0	0	0	0	0	0	0.093	0	304	89849	0.338345	1.03	458.21	HFX_YangJing_HJX_31_20230420_F1_R1.raw
36	C#CC1=CC=C(C(OC(CC(C)(C)C2)=CC2=O)=O)C=C1	0	0.75	0	0	0	0	0	0	0	0	0	0	0	0	0	0	0	0	0	0	8	84947	0.00941764	0.84885	517.17	HFX_YangJing_HJX_37_20230420_F1_R1.raw
37	C#CC1=CC=C(C(OC2=CC(CC2)=O)=O)C=C1	0	0.536	0	0	0	0.174	0	0	0	0	0	0	0	0	0	0	0	0	0.128	0	2005	77255	2.5953	2.26743	413.244	HFX_YangJing_HJX_E4_20230330_F1_R1.raw
38	C#CCOC1=CC=C([N+]#[C-])C=C1	0	0.269	0	0	0	0	0	0.518	0	0	0	0	0	0	0	0	0	0.073	0.116	0	1878	56536	3.32178	0.0735292	367.201	Fusion3_YangJing_FanYouLong_CYB-1_OTOT_5per_20230613_F1_R1.raw
39	COC1=CC=C([N+]#[C-])C=C1OCC#C	0	0.222	0	0	0	0	0	0.554	0	0	0	0	0	0	0	0	0	0.072	0.131	0	1781	51222	3.47702	0.490195	367.201	Fusion3_YangJing_FanYouLong_CYB-2_OTOT_5per_20230613_F1_R1.raw
40	O=C(CC[N+]#[C-])NC1=CC=C(OCC#C)C=C1	0	0	0	0	0	0	0	0	0	0	0	0	0	0	0	0	0	0	0.891	0	147	92801	0.158403	0.424528	412.222	HFX_YangJing_HJX_17_20230420_F1_R1.raw
41	C#CCN1C2=C(C=C([N+]#[C-])C=C2)C3=CC=CC=C31	0	0	0	0	0	0	0	0	0	0	0	0	0	0	0	0	0	0	0.931	0	202	90694	0.222727	1.35901	442.233	HFX_YangJing_HJX_18_20230420_F1_R1.raw
42	O=C(CC[N+]#[C-])NC1=CC=C(OCC#C)C=C1	0	0	0	0	0	0	0	0.286	0	0	0	0	0	0	0	0	0	0	0	0	7	94893	0.00737673	8.73809	467.26	HFX_YangJing_HJX_19_20230420_F1_R1.raw
43	C#CCN1C2=C(C=C([N+]#[C-])C=C2)C3=CC=CC=C31	0	0	0	0	0	0	0	0.5	0	0	0	0	0	0	0	0	0	0	0	0	10	57670	0.01734	0.756305	485.254	Fusion3_YangJing_FanYouLong_YJ-8_OTOT_50per_20230526_F1_R1.raw
