# Supplementary material
Source: Research Square preprint supplement (doi:10.21203/rs.3.rs-5177030/v1)
Supplement: Supplementary file 8 [file c6c9a7d8b482a70545d80aec.xlsx]

## Sheet: Legend
Supplementary Data 3. Site-centric chemoproteomic profiling of reactive residues. For each sheet named by the probe as indicated (IPM, NHS, Az9, 34, 36, 39, 46, 48, 50, and 55), lysates from HEK293T cells were labeled with 1 mM of each probe, and subjected to tryptic digestion. The probe-modified peptides were further conjugated to an azido biotin reagent with a photocleavable linker via CuAAC. T…

## Sheet: IPM
set1			set2			set3
sp|Leading Ac|Genename@Site			sp|Leading Ac|Genename@Site			sp|Leading Ac|Genename@Site
sp|Q01780|EXOSX_HUMAN@73			sp|Q01780|EXOSX_HUMAN@73			sp|Q01780|EXOSX_HUMAN@73
sp|Q9Y6I4|UBP3_HUMAN@362			sp|Q9Y6I4|UBP3_HUMAN@362			sp|Q9Y6I4|UBP3_HUMAN@362
sp|P57775|FBXW4_HUMAN@55			sp|P30825|CTR1_HUMAN@21			sp|Q9Y5Z9|UBIA1_HUMAN@31
sp|P07203|GPX1_HUMAN@202			sp|P55786|PSA_HUMAN@339			sp|Q92922|SMRC1_HUMAN@164
sp|Q02224|CENPE_HUMAN@714			sp|Q9BRX2|PELO_HUMAN@258			sp|P09543|CN37_HUMAN@49
sp|P55786|PSA_HUMAN@339			sp|Q9UPU7|TBD2B_HUMAN@387			sp|P30825|CTR1_HUMAN@21
sp|Q9BRX2|PELO_HUMAN@258			sp|P55265|DSRAD_HUMAN@649			sp|Q99AU3|NS1_I18A0@47
sp|Q9UPU7|TBD2B_HUMAN@387			sp|O15243|OBRG_HUMAN@66			sp|Q02224|CENPE_HUMAN@714
sp|P55265|DSRAD_HUMAN@649			sp|Q12769|NU160_HUMAN@1166			sp|Q8TAV0|FA76A_HUMAN@26
sp|P62913|RL11_HUMAN@72			sp|Q12797|ASPH_HUMAN@660			sp|P55786|PSA_HUMAN@339
sp|O75439|MPPB_HUMAN@277			sp|P07992|ERCC1_HUMAN@76			sp|Q9BRX2|PELO_HUMAN@258
sp|Q12769|NU160_HUMAN@1166			sp|O75116|ROCK2_HUMAN@1257			sp|Q9UPU7|TBD2B_HUMAN@387
sp|O15243|OBRG_HUMAN@66			sp|Q6KC79|NIPBL_HUMAN@1795			sp|P55265|DSRAD_HUMAN@649
sp|Q12797|ASPH_HUMAN@660			sp|Q9H6R4|NOL6_HUMAN@777			sp|Q9NQT5|EXOS3_HUMAN@67
sp|O75116|ROCK2_HUMAN@1257			sp|Q9Y6X9|MORC2_HUMAN@962			sp|P62913|RL11_HUMAN@72
sp|Q6KC79|NIPBL_HUMAN@1795			sp|P63092|GNAS2_HUMAN@3			sp|Q96DM3|RMC1_HUMAN@333
sp|Q9H6R4|NOL6_HUMAN@777			sp|Q8TF05|PP4R1_HUMAN@566			sp|O75439|MPPB_HUMAN@277
sp|Q9Y6X9|MORC2_HUMAN@962			sp|Q8N3U4|STAG2_HUMAN@640			sp|Q12769|NU160_HUMAN@1166
sp|P63092|GNAS2_HUMAN@3			sp|O95630|STABP_HUMAN@221			sp|Q12797|ASPH_HUMAN@660
sp|Q8TF05|PP4R1_HUMAN@566			sp|P0DMV9|HS71B_HUMAN@574			sp|P00367|DHE3_HUMAN@327
sp|Q96BR1|SGK3_HUMAN@322			sp|Q99700|ATX2_HUMAN@852			sp|P07992|ERCC1_HUMAN@76
sp|Q9NQE9|HINT3_HUMAN@96			sp|Q15477|SKI2_HUMAN@247			sp|Q6KC79|NIPBL_HUMAN@1795
sp|Q8N3U4|STAG2_HUMAN@640			sp|Q7L0Q8|RHOU_HUMAN@102			sp|Q9H6R4|NOL6_HUMAN@777
sp|O95630|STABP_HUMAN@221			sp|Q9BPX3|CND3_HUMAN@843			sp|Q9NVX0|HAUS2_HUMAN@118
sp|Q15477|SKI2_HUMAN@247			sp|P49761|CLK3_HUMAN@321			sp|Q8TER5|ARH40_HUMAN@428
sp|Q8ND04|SMG8_HUMAN@359			sp|Q9BVQ7|AFG2B_HUMAN@732			sp|Q9Y6X9|MORC2_HUMAN@962
sp|Q9BPX3|CND3_HUMAN@843			sp|Q9NYH9|UTP6_HUMAN@175			sp|P63092|GNAS2_HUMAN@3
sp|P49761|CLK3_HUMAN@321			sp|P22695|QCR2_HUMAN@125			sp|Q8TF05|PP4R1_HUMAN@566
sp|Q9BVQ7|AFG2B_HUMAN@732			sp|Q99719|SEPT5_HUMAN@300			sp|Q9H4B7|TBB1_HUMAN@12
sp|O15063|GRRE1_HUMAN@502			sp|Q5SWX8|ODR4_HUMAN@275			sp|P31271|HXA13_HUMAN@194
sp|Q9NYH9|UTP6_HUMAN@175			sp|Q9HAV4|XPO5_HUMAN@221			sp|Q96BR1|SGK3_HUMAN@322
sp|P22695|QCR2_HUMAN@125			sp|P41252|SYIC_HUMAN@433			sp|Q8N3U4|STAG2_HUMAN@640
sp|Q99719|SEPT5_HUMAN@300			sp|Q63HN8|RN213_HUMAN@1464			sp|Q9NQE9|HINT3_HUMAN@96
sp|Q5SWX8|ODR4_HUMAN@275			sp|Q02790|FKBP4_HUMAN@396			sp|O95630|STABP_HUMAN@221
sp|Q0P6D2|DIK1C_HUMAN@278			sp|P49643|PRI2_HUMAN@111			sp|Q99700|ATX2_HUMAN@852
sp|Q9HAV4|XPO5_HUMAN@221			sp|Q4L235|ACSF4_HUMAN@13			sp|Q15477|SKI2_HUMAN@247
sp|P41252|SYIC_HUMAN@433			sp|Q9NVV4|PAPD1_HUMAN@419			sp|Q7L0Q8|RHOU_HUMAN@102
sp|Q02790|FKBP4_HUMAN@396			sp|Q9BXP5|SRRT_HUMAN@640			sp|Q8ND04|SMG8_HUMAN@359
sp|P49643|PRI2_HUMAN@111			sp|Q86XA9|HTR5A_HUMAN@95			sp|Q9NVH2|INT7_HUMAN@298
sp|Q00341|VIGLN_HUMAN@948			sp|O15020|SPTN2_HUMAN@607			sp|Q9ULV4|COR1C_HUMAN@343
sp|Q4L235|ACSF4_HUMAN@13			sp|Q9BSU1|PHAF1_HUMAN@222			sp|Q9BPX3|CND3_HUMAN@843
sp|Q9BXP5|SRRT_HUMAN@640			sp|Q02446|SP4_HUMAN@55			sp|Q8NI60|COQ8A_HUMAN@620
sp|Q8N3E9|PLCD3_HUMAN@553			sp|Q9NXV6|CARF_HUMAN@178			sp|Q9UKL3|C8AP2_HUMAN@978
sp|O15020|SPTN2_HUMAN@607			sp|Q16822|PCKGM_HUMAN@306			sp|Q9BVQ7|AFG2B_HUMAN@732
sp|Q9BSU1|PHAF1_HUMAN@222			sp|Q8ND82|Z280C_HUMAN@242			sp|P49761|CLK3_HUMAN@321
sp|Q02446|SP4_HUMAN@55			sp|Q9BV20|MTNA_HUMAN@199			sp|Q86VP1|TAXB1_HUMAN@328
sp|Q9UKV3|ACINU_HUMAN@1223			sp|Q6ZMT4|KDM7A_HUMAN@492			sp|O15063|GRRE1_HUMAN@502
sp|Q7Z3T8|ZFY16_HUMAN@313			sp|P49736|MCM2_HUMAN@223			sp|Q7L5Y9|MAEA_HUMAN@302
sp|Q9NXV6|CARF_HUMAN@178			sp|P20810|ICAL_HUMAN@241			sp|P22695|QCR2_HUMAN@125
sp|Q16822|PCKGM_HUMAN@306			sp|Q9UPU7|TBD2B_HUMAN@726			sp|Q5SWX8|ODR4_HUMAN@275
sp|Q8ND82|Z280C_HUMAN@242			sp|O60841|IF2P_HUMAN@635			sp|Q99719|SEPT5_HUMAN@300
sp|Q9BV20|MTNA_HUMAN@199			sp|O15226|NKRF_HUMAN@386			sp|Q9HAV4|XPO5_HUMAN@221
sp|Q13614|MTMR2_HUMAN@635			sp|P17509|HXB6_HUMAN@88			sp|P41252|SYIC_HUMAN@433
sp|Q6ZMT4|KDM7A_HUMAN@492			sp|Q86UB9|TM135_HUMAN@234			sp|Q63HN8|RN213_HUMAN@1464
sp|P49736|MCM2_HUMAN@223			sp|Q69YQ0|CYTSA_HUMAN@79			sp|Q9Y5L0|TNPO3_HUMAN@912
sp|P20810|ICAL_HUMAN@241			sp|Q9ULK4|MED23_HUMAN@1069			sp|Q02790|FKBP4_HUMAN@396
sp|Q9UPU7|TBD2B_HUMAN@726			sp|Q9Y4B4|ARIP4_HUMAN@471			sp|Q8TB03|CX038_HUMAN@31
sp|O60841|IF2P_HUMAN@635			sp|P51957|NEK4_HUMAN@664			sp|P49643|PRI2_HUMAN@111
sp|O15226|NKRF_HUMAN@386			sp|Q9UBU6|FA8A1_HUMAN@343			sp|Q00341|VIGLN_HUMAN@948
sp|P17509|HXB6_HUMAN@88			sp|P11047|LAMC1_HUMAN@1600			sp|Q4L235|ACSF4_HUMAN@13
sp|Q86UB9|TM135_HUMAN@234			sp|Q6UWZ7|ABRX1_HUMAN@186			sp|Q9NVV4|PAPD1_HUMAN@419
sp|Q5JTH9|RRP12_HUMAN@517			sp|Q9NW64|RBM22_HUMAN@74			sp|Q9BXP5|SRRT_HUMAN@640
sp|Q69YQ0|CYTSA_HUMAN@79			sp|Q8NC96|NECP1_HUMAN@162			sp|Q8N3E9|PLCD3_HUMAN@553
sp|Q9Y4B4|ARIP4_HUMAN@471			sp|Q6IBS0|TWF2_HUMAN@141			sp|O15020|SPTN2_HUMAN@607
sp|Q14146|URB2_HUMAN@1280			sp|Q8IY67|RAVR1_HUMAN@239			sp|Q9BSU1|PHAF1_HUMAN@222
sp|Q9UBU6|FA8A1_HUMAN@343			sp|Q5VUA4|ZN318_HUMAN@158			sp|Q02446|SP4_HUMAN@55
sp|P11047|LAMC1_HUMAN@1600			sp|Q14566|MCM6_HUMAN@180			sp|Q9UKV3|ACINU_HUMAN@1223
sp|Q6UWZ7|ABRX1_HUMAN@186			sp|P49915|GUAA_HUMAN@631			sp|Q9NXV6|CARF_HUMAN@178
sp|Q9NW64|RBM22_HUMAN@74			sp|Q9Y4P1|ATG4B_HUMAN@203			sp|Q16822|PCKGM_HUMAN@306
sp|O15084|ANR28_HUMAN@966			sp|Q9BTX1|NDC1_HUMAN@468			sp|O14802|RPC1_HUMAN@261
sp|Q8NC96|NECP1_HUMAN@162			sp|P57081|WDR4_HUMAN@137			sp|Q8ND82|Z280C_HUMAN@242
sp|Q562E7|WDR81_HUMAN@296			sp|P42704|LPPRC_HUMAN@394			sp|Q9BV20|MTNA_HUMAN@199
sp|Q6IBS0|TWF2_HUMAN@141			sp|P26639|SYTC_HUMAN@107			sp|Q9C0D5|TANC1_HUMAN@1611
sp|Q8IY67|RAVR1_HUMAN@239			sp|Q8N3C0|ASCC3_HUMAN@1906			sp|Q13614|MTMR2_HUMAN@635
sp|Q5VUA4|ZN318_HUMAN@158			sp|Q15652|JHD2C_HUMAN@508			sp|Q5T4S7|UBR4_HUMAN@3930
sp|Q14566|MCM6_HUMAN@180			sp|Q9NUP7|TRM13_HUMAN@414			sp|Q6ZMT4|KDM7A_HUMAN@492
sp|P49915|GUAA_HUMAN@631			sp|Q9UQ80|PA2G4_HUMAN@149			sp|Q2T9J0|TYSD1_HUMAN@34
sp|Q8WWZ3|EDAD_HUMAN@132			sp|P12004|PCNA_HUMAN@81			sp|P49736|MCM2_HUMAN@223
sp|Q9BTX1|NDC1_HUMAN@468			sp|A5YKK6|CNOT1_HUMAN@1706			sp|P20810|ICAL_HUMAN@241
sp|P57081|WDR4_HUMAN@137			sp|Q9P0K7|RAI14_HUMAN@973			sp|Q9UPU7|TBD2B_HUMAN@726
sp|Q8TD19|NEK9_HUMAN@626			sp|Q9H8V3|ECT2_HUMAN@584			sp|O60841|IF2P_HUMAN@635
sp|P42704|LPPRC_HUMAN@394			sp|P17844|DDX5_HUMAN@234			sp|O15226|NKRF_HUMAN@386
sp|Q4V328|GRAP1_HUMAN@243			sp|O75153|CLU_HUMAN@1196			sp|P17509|HXB6_HUMAN@88
sp|P26639|SYTC_HUMAN@107			sp|Q9Y3U8|RL36_HUMAN@48			sp|Q86UB9|TM135_HUMAN@234
sp|Q8N3C0|ASCC3_HUMAN@1906			sp|Q9NZW5|PALS2_HUMAN@432			sp|Q69YQ0|CYTSA_HUMAN@79
sp|Q15652|JHD2C_HUMAN@508			sp|O95714|HERC2_HUMAN@914			sp|Q9Y4B4|ARIP4_HUMAN@471
sp|Q9NUP7|TRM13_HUMAN@414			sp|Q9BQG0|MBB1A_HUMAN@623			sp|Q9BZ29|DOCK9_HUMAN@628
sp|Q9UQ80|PA2G4_HUMAN@149			sp|O95239|KIF4A_HUMAN@190			sp|Q14146|URB2_HUMAN@1280
sp|Q9H582|ZN644_HUMAN@237			sp|Q8TAE8|G45IP_HUMAN@124			sp|Q92538|GBF1_HUMAN@168
sp|P12004|PCNA_HUMAN@81			sp|Q5XPI4|RN123_HUMAN@1180			sp|P51957|NEK4_HUMAN@664
sp|Q9UQR0|SCML2_HUMAN@688			sp|Q9BXF3|CECR2_HUMAN@1084			sp|P11047|LAMC1_HUMAN@1600
sp|A5YKK6|CNOT1_HUMAN@1706			sp|Q9H6F5|CCD86_HUMAN@116			sp|Q6UWZ7|ABRX1_HUMAN@186
sp|Q7Z7A1|CNTRL_HUMAN@1451			sp|Q8NEB9|PK3C3_HUMAN@336			sp|Q709C8|VP13C_HUMAN@3707
sp|Q9P0K7|RAI14_HUMAN@973			sp|O94854|K0754_HUMAN@216			sp|O15084|ANR28_HUMAN@966
sp|Q9H8V3|ECT2_HUMAN@584			sp|O75140|DEPD5_HUMAN@481			sp|Q9NUX5|POTE1_HUMAN@349
sp|P17844|DDX5_HUMAN@234			sp|Q8N5U6|RNF10_HUMAN@483			sp|Q8NC96|NECP1_HUMAN@162
sp|O75153|CLU_HUMAN@1196			sp|Q99741|CDC6_HUMAN@417			sp|Q6IBS0|TWF2_HUMAN@141
sp|Q9Y3U8|RL36_HUMAN@48			sp|Q9Y5B0|CTDP1_HUMAN@73			sp|Q8IY67|RAVR1_HUMAN@239
sp|Q9BSD7|NTPCR_HUMAN@110			sp|O75600|KBL_HUMAN@349			sp|Q5VUA4|ZN318_HUMAN@158
sp|Q9NZW5|PALS2_HUMAN@432			sp|O00299|CLIC1_HUMAN@223			sp|Q14566|MCM6_HUMAN@180
sp|Q15058|KIF14_HUMAN@291			sp|Q9NVH1|DJC11_HUMAN@518			sp|P49915|GUAA_HUMAN@631
sp|O95714|HERC2_HUMAN@914			sp|P46821|MAP1B_HUMAN@2041			sp|Q9H2D6|TARA_HUMAN@2302
sp|Q9BQG0|MBB1A_HUMAN@623			sp|Q9H1A3|METL9_HUMAN@215			sp|Q9C0I4|THS7B_HUMAN@176
sp|O95239|KIF4A_HUMAN@190			sp|P49821|NDUV1_HUMAN@142			sp|Q8WWZ3|EDAD_HUMAN@132
sp|Q8TAE8|G45IP_HUMAN@124			sp|Q9NPG3|UBN1_HUMAN@548			sp|Q9Y4P1|ATG4B_HUMAN@203
sp|Q5XPI4|RN123_HUMAN@1180			sp|Q9P2I0|CPSF2_HUMAN@765			sp|Q9BTX1|NDC1_HUMAN@468
sp|Q9BXF3|CECR2_HUMAN@1084			sp|O60907|TBL1X_HUMAN@401			sp|Q9H9E3|COG4_HUMAN@163
sp|Q9H6F5|CCD86_HUMAN@116			sp|Q8WV93|AFG1L_HUMAN@100			sp|P57081|WDR4_HUMAN@137
sp|Q8NEB9|PK3C3_HUMAN@336			sp|Q08945|SSRP1_HUMAN@207			sp|Q9GZR1|SENP6_HUMAN@360
sp|Q5XPI4|RN123_HUMAN@1187			sp|Q9NUP9|LIN7C_HUMAN@47			sp|P0C7T5|ATX1L_HUMAN@305
sp|O75140|DEPD5_HUMAN@481			sp|Q92609|TBCD5_HUMAN@192			sp|Q8N5V2|NGEF_HUMAN@438
sp|Q8N5U6|RNF10_HUMAN@483			sp|P49327|FAS_HUMAN@1828			sp|Q9UM54|MYO6_HUMAN@790
sp|Q99741|CDC6_HUMAN@417			sp|P52732|KIF11_HUMAN@911			sp|Q8TD19|NEK9_HUMAN@626
sp|Q9Y5B0|CTDP1_HUMAN@73			sp|Q14980|NUMA1_HUMAN@80			sp|P12268|IMDH2_HUMAN@468
sp|O75600|KBL_HUMAN@349			sp|Q96ST3|SIN3A_HUMAN@425			sp|Q4V328|GRAP1_HUMAN@243
sp|O00299|CLIC1_HUMAN@223			sp|Q9NY74|ETAA1_HUMAN@68			sp|P26639|SYTC_HUMAN@107
sp|Q9NVH1|DJC11_HUMAN@518			sp|Q8IZ69|TRM2A_HUMAN@111			sp|Q12931|TRAP1_HUMAN@35
sp|P46821|MAP1B_HUMAN@2041			REV_sp|Q9UKP4|ATS7_HUMAN@19			sp|Q8N3C0|ASCC3_HUMAN@1906
sp|Q9H1A3|METL9_HUMAN@215			sp|P78371|TCPB_HUMAN@412			sp|Q15652|JHD2C_HUMAN@508
sp|Q13586|STIM1_HUMAN@56			sp|O15111|IKKA_HUMAN@114			sp|Q96KC2|ARL5B_HUMAN@132
sp|P49821|NDUV1_HUMAN@142			sp|Q9NR09|BIRC6_HUMAN@543			sp|Q9NUP7|TRM13_HUMAN@414
sp|Q9H2K8|TAOK3_HUMAN@795			sp|Q9H2J7|S6A15_HUMAN@367			sp|Q9UQ80|PA2G4_HUMAN@149
sp|Q69YN2|C19L1_HUMAN@426			sp|P0CAP2|GRL1A_HUMAN@82			sp|Q9NUP7|TRM13_HUMAN@268
sp|Q9P2I0|CPSF2_HUMAN@765			sp|Q96EI5|TCAL4_HUMAN@34			sp|Q9H582|ZN644_HUMAN@237
sp|O60907|TBL1X_HUMAN@401			sp|O00429|DNM1L_HUMAN@367			sp|P12004|PCNA_HUMAN@81
sp|Q6IEG0|SNR48_HUMAN@292			sp|Q8N9N5|BANP_HUMAN@113			sp|O00629|IMA3_HUMAN@325
sp|Q5SVZ6|ZMYM1_HUMAN@490			sp|Q5SVZ6|ZMYM1_HUMAN@662			sp|Q9UQR0|SCML2_HUMAN@688
sp|Q8WV93|AFG1L_HUMAN@100			sp|Q9NUE0|ZDH18_HUMAN@156			sp|A5YKK6|CNOT1_HUMAN@1706
sp|Q08945|SSRP1_HUMAN@207			sp|Q9H4L7|SMRCD_HUMAN@407			sp|Q7Z7A1|CNTRL_HUMAN@1451
sp|Q9NUP9|LIN7C_HUMAN@47			sp|Q70CQ2|UBP34_HUMAN@856			sp|Q9P0K7|RAI14_HUMAN@973
sp|A1L020|MEX3A_HUMAN@328			sp|P60981|DEST_HUMAN@135			sp|P78527|PRKDC_HUMAN@1164
sp|Q92538|GBF1_HUMAN@686			sp|P04183|KITH_HUMAN@206			sp|Q9H8V3|ECT2_HUMAN@584
sp|Q92609|TBCD5_HUMAN@192			sp|Q6IQ21|ZN770_HUMAN@15			sp|P17844|DDX5_HUMAN@234
sp|P49327|FAS_HUMAN@1828			sp|Q969S9|RRF2M_HUMAN@329			sp|O75153|CLU_HUMAN@1196
sp|Q14980|NUMA1_HUMAN@80			sp|P17655|CAN2_HUMAN@498			sp|Q9Y3U8|RL36_HUMAN@48
sp|P52732|KIF11_HUMAN@911			sp|Q9HCK1|ZDBF2_HUMAN@162			sp|Q9NPI6|DCP1A_HUMAN@149
sp|Q96ST3|SIN3A_HUMAN@425			sp|Q9UJY4|GGA2_HUMAN@343			sp|Q9BSD7|NTPCR_HUMAN@110
sp|Q9NY74|ETAA1_HUMAN@68			sp|O95602|RPA1_HUMAN@582			sp|Q9NZW5|PALS2_HUMAN@432
sp|O15111|IKKA_HUMAN@114			sp|Q9NY33|DPP3_HUMAN@509			sp|Q9BZ67|FRMD8_HUMAN@191
sp|Q9NR09|BIRC6_HUMAN@543			sp|O15228|GNPAT_HUMAN@668			sp|Q15048|LRC14_HUMAN@147
sp|Q9H2J7|S6A15_HUMAN@367			sp|Q8WXH0|SYNE2_HUMAN@1598			sp|O95714|HERC2_HUMAN@914
sp|Q9Y282|ERGI3_HUMAN@199			sp|P53396|ACLY_HUMAN@845			sp|Q9BQG0|MBB1A_HUMAN@623
sp|P38398|BRCA1_HUMAN@27			sp|Q9C0D5|TANC1_HUMAN@209			sp|O95239|KIF4A_HUMAN@190
sp|P0CAP2|GRL1A_HUMAN@82			sp|P46100|ATRX_HUMAN@1531			sp|Q8TAE8|G45IP_HUMAN@124
sp|Q96EI5|TCAL4_HUMAN@34			sp|O75400|PR40A_HUMAN@39			sp|Q5XPI4|RN123_HUMAN@1180
sp|Q96LJ7|DHRS1_HUMAN@28			sp|Q9Y573|IPP_HUMAN@312			sp|Q9NWZ3|IRAK4_HUMAN@128
sp|O00429|DNM1L_HUMAN@367			sp|Q92759|TF2H4_HUMAN@16			sp|Q9BXF3|CECR2_HUMAN@1084
sp|Q8N9N5|BANP_HUMAN@113			sp|O60287|NPA1P_HUMAN@226			sp|Q9H6F5|CCD86_HUMAN@116
sp|Q9NUE0|ZDH18_HUMAN@156			sp|P12270|TPR_HUMAN@75			sp|P11362|FGFR1_HUMAN@603
sp|Q9H4L7|SMRCD_HUMAN@407			sp|Q9BWU0|NADAP_HUMAN@170			sp|Q8NEB9|PK3C3_HUMAN@336
sp|Q70CQ2|UBP34_HUMAN@856			sp|O43143|DHX15_HUMAN@226			sp|P07225|PROS_HUMAN@88
sp|Q9UBB6|NCDN_HUMAN@725			sp|Q96F86|EDC3_HUMAN@341			sp|O75140|DEPD5_HUMAN@481
sp|P60981|DEST_HUMAN@135			sp|P30153|2AAA_HUMAN@174			sp|Q8N5U6|RNF10_HUMAN@483
sp|P04183|KITH_HUMAN@206			sp|Q6GMV2|SMYD5_HUMAN@194			sp|Q9Y5B0|CTDP1_HUMAN@73
sp|Q6IQ21|ZN770_HUMAN@15			sp|Q9UJX3|APC7_HUMAN@295			sp|Q99741|CDC6_HUMAN@417
sp|O43257|ZNHI1_HUMAN@140			sp|Q9Y6K9|NEMO_HUMAN@95			sp|O75600|KBL_HUMAN@349
sp|Q12789|TF3C1_HUMAN@1363			sp|P28066|PSA5_HUMAN@76			sp|O00299|CLIC1_HUMAN@223
sp|Q969S9|RRF2M_HUMAN@329			sp|Q9UBC2|EP15R_HUMAN@470			sp|Q9NVH1|DJC11_HUMAN@518
sp|Q8N5B7|CERS5_HUMAN@369			sp|Q14746|COG2_HUMAN@563			sp|P46821|MAP1B_HUMAN@2041
sp|P17655|CAN2_HUMAN@498			sp|Q9Y2K2|SIK3_HUMAN@655			sp|Q3T8J9|GON4L_HUMAN@2140
sp|O14686|KMT2D_HUMAN@58			sp|Q9H9A5|CNO10_HUMAN@633			sp|Q9H1A3|METL9_HUMAN@215
sp|O14802|RPC1_HUMAN@19			sp|Q8N201|INT1_HUMAN@1433			sp|Q13586|STIM1_HUMAN@56
sp|Q9UJY4|GGA2_HUMAN@343			sp|P35232|PHB1_HUMAN@69			sp|P49821|NDUV1_HUMAN@142
sp|Q9H270|VPS11_HUMAN@568			sp|Q96LW9|ZSC31_HUMAN@46			sp|Q9NPG3|UBN1_HUMAN@548
sp|Q86Y56|DAAF5_HUMAN@420			sp|Q5BKX5|ACTMP_HUMAN@186			sp|Q9UNM6|PSD13_HUMAN@182
sp|Q9P2D3|HTR5B_HUMAN@95			sp|O00458|IFRD1_HUMAN@277			sp|Q69YN2|C19L1_HUMAN@426
sp|Q9UI12|VATH_HUMAN@312			sp|Q8N3Z3|GTPB8_HUMAN@114			sp|Q9P2I0|CPSF2_HUMAN@765
sp|P21953|ODBB_HUMAN@228			sp|P29597|TYK2_HUMAN@936			sp|Q9UBN7|HDAC6_HUMAN@128
sp|O95602|RPA1_HUMAN@582			sp|Q9NYY8|FAKD2_HUMAN@163			sp|Q14012|KCC1A_HUMAN@179
sp|Q9C0D5|TANC1_HUMAN@131			sp|Q13444|ADA15_HUMAN@409			sp|O60907|TBL1X_HUMAN@401
sp|P48431|SOX2_HUMAN@265			sp|Q96KB5|TOPK_HUMAN@70			sp|Q6IEG0|SNR48_HUMAN@292
sp|O15228|GNPAT_HUMAN@668			sp|Q15334|L2GL1_HUMAN@505			sp|Q5SVZ6|ZMYM1_HUMAN@490
sp|Q8WXH0|SYNE2_HUMAN@1598			sp|P67870|CSK2B_HUMAN@109			sp|Q8WV93|AFG1L_HUMAN@100
sp|P53396|ACLY_HUMAN@845			sp|Q8WWK9|CKAP2_HUMAN@648			sp|Q08945|SSRP1_HUMAN@207
sp|Q9C0D5|TANC1_HUMAN@209			sp|Q9UKU7|ACAD8_HUMAN@159			sp|Q9UNA4|POLI_HUMAN@560
sp|Q9Y573|IPP_HUMAN@312			sp|Q01518|CAP1_HUMAN@93			sp|Q96KG9|SCYL1_HUMAN@88
sp|O75400|PR40A_HUMAN@39			sp|Q9UL63|MKLN1_HUMAN@82			sp|Q6PJI9|WDR59_HUMAN@233
sp|Q92759|TF2H4_HUMAN@16			sp|A4D1P6|WDR91_HUMAN@351			sp|Q562F6|SGO2_HUMAN@954
sp|P12270|TPR_HUMAN@75			sp|P61106|RAB14_HUMAN@40			sp|P51784|UBP11_HUMAN@894
sp|Q9BWU0|NADAP_HUMAN@170			sp|Q9BSJ5|CQ080_HUMAN@545			sp|Q9NUP9|LIN7C_HUMAN@47
sp|A5PLN9|TPC13_HUMAN@332			sp|Q69YN2|C19L1_HUMAN@511			sp|A1L020|MEX3A_HUMAN@328
sp|Q68CP9|ARID2_HUMAN@1549			sp|O60518|RNBP6_HUMAN@952			sp|Q92538|GBF1_HUMAN@686
sp|Q9NSV4|DIAP3_HUMAN@688			sp|Q8IXT5|RB12B_HUMAN@919			sp|Q13530|SERC3_HUMAN@72
sp|P30153|2AAA_HUMAN@174			sp|Q16877|F264_HUMAN@29			sp|P25054|APC_HUMAN@207
sp|Q9UJX3|APC7_HUMAN@295			sp|Q16513|PKN2_HUMAN@131			sp|P49327|FAS_HUMAN@1828
sp|Q6GMV2|SMYD5_HUMAN@194			sp|Q29RF7|PDS5A_HUMAN@14			sp|Q92609|TBCD5_HUMAN@192
sp|Q9UBC2|EP15R_HUMAN@470			sp|Q8IX90|SKA3_HUMAN@20			sp|Q14980|NUMA1_HUMAN@80
sp|P41252|SYIC_HUMAN@120			sp|Q86Y56|DAAF5_HUMAN@349			sp|P52732|KIF11_HUMAN@911
sp|Q86WA8|LONP2_HUMAN@405			sp|Q99570|PI3R4_HUMAN@693			sp|O00186|STXB3_HUMAN@90
sp|P38398|BRCA1_HUMAN@348			sp|Q9NU22|MDN1_HUMAN@1867			sp|Q9NY74|ETAA1_HUMAN@68
sp|Q969X6|UTP4_HUMAN@21			sp|Q9BQG0|MBB1A_HUMAN@890			sp|Q96ST3|SIN3A_HUMAN@425
sp|Q9H9A5|CNO10_HUMAN@633			sp|O43172|PRP4_HUMAN@299			sp|Q8IZ69|TRM2A_HUMAN@111
sp|Q9HC36|MRM3_HUMAN@290			sp|Q08J23|NSUN2_HUMAN@502			sp|P78371|TCPB_HUMAN@412
sp|Q8N201|INT1_HUMAN@1433			sp|Q8WYP5|ELYS_HUMAN@693			sp|O15111|IKKA_HUMAN@114
sp|Q9Y2T2|AP3M1_HUMAN@97			sp|O14524|NEMP1_HUMAN@67			sp|Q9NR09|BIRC6_HUMAN@543
sp|P35232|PHB1_HUMAN@69			sp|Q8WY36|BBX_HUMAN@938			sp|Q9H2J7|S6A15_HUMAN@367
sp|P27695|APEX1_HUMAN@65			sp|Q8N2W9|PIAS4_HUMAN@164			sp|P78357|CNTP1_HUMAN@1250
sp|Q6SW48|UL95_HCMVM@466			sp|Q7Z7K6|CENPV_HUMAN@219			sp|P38398|BRCA1_HUMAN@27
sp|Q5BKX5|ACTMP_HUMAN@186			sp|Q7Z7A3|CTU1_HUMAN@210			sp|Q9BZM4|ULBP3_HUMAN@51
sp|O00458|IFRD1_HUMAN@277			sp|Q6PKG0|LARP1_HUMAN@60			sp|Q8N587|ZN561_HUMAN@174
sp|Q8N3Z3|GTPB8_HUMAN@114			sp|Q9H0C8|ILKAP_HUMAN@312			sp|P0CAP2|GRL1A_HUMAN@82
sp|Q9Y4F3|MARF1_HUMAN@654			sp|Q92698|RAD54_HUMAN@644			sp|Q96EI5|TCAL4_HUMAN@34
sp|Q9NYY8|FAKD2_HUMAN@163			sp|O75616|ERAL1_HUMAN@150			sp|O95819|M4K4_HUMAN@269
sp|Q96KB5|TOPK_HUMAN@70			sp|Q96IG2|FXL20_HUMAN@48			sp|O00429|DNM1L_HUMAN@367
sp|Q15334|L2GL1_HUMAN@505			sp|Q9NZ71|RTEL1_HUMAN@537			sp|Q96LJ7|DHRS1_HUMAN@28
sp|Q93008|USP9X_HUMAN@2293			sp|Q9BZG1|RAB34_HUMAN@67			sp|Q7Z3J2|VP35L_HUMAN@277
sp|P67870|CSK2B_HUMAN@109			sp|P46060|RAGP1_HUMAN@169			sp|Q16775|GLO2_HUMAN@189
sp|Q9UKU7|ACAD8_HUMAN@159			sp|P53602|MVD1_HUMAN@386			sp|Q8N9N5|BANP_HUMAN@113
sp|Q8WWK9|CKAP2_HUMAN@648			sp|P63010|AP2B1_HUMAN@129			sp|Q5SVZ6|ZMYM1_HUMAN@662
sp|Q01518|CAP1_HUMAN@93			sp|Q9P0L2|MARK1_HUMAN@284			sp|Q9NUE0|ZDH18_HUMAN@156
sp|P61106|RAB14_HUMAN@40			sp|Q7Z5J4|RAI1_HUMAN@1553			sp|Q9H4L7|SMRCD_HUMAN@407
sp|A4D1P6|WDR91_HUMAN@351			sp|Q5UIP0|RIF1_HUMAN@312			sp|Q70CQ2|UBP34_HUMAN@856
sp|Q13616|CUL1_HUMAN@496			sp|O94832|MYO1D_HUMAN@143			sp|Q9BVN2|RUSC1_HUMAN@853
sp|Q8N7H5|PAF1_HUMAN@218			sp|O15371|EIF3D_HUMAN@19			sp|Q9UBB6|NCDN_HUMAN@725
sp|Q8IXT5|RB12B_HUMAN@919			sp|Q9P215|POGK_HUMAN@218			sp|P60981|DEST_HUMAN@135
sp|O95239|KIF4A_HUMAN@269			sp|Q9H7N4|SFR19_HUMAN@950			sp|P04183|KITH_HUMAN@206
sp|Q16513|PKN2_HUMAN@131			sp|Q96AD5|PLPL2_HUMAN@412			sp|Q6IQ21|ZN770_HUMAN@15
sp|Q29RF7|PDS5A_HUMAN@14			sp|Q6IA69|NADE_HUMAN@531			sp|O43257|ZNHI1_HUMAN@140
sp|Q8IX90|SKA3_HUMAN@20			sp|P20700|LMNB1_HUMAN@198			sp|Q12789|TF3C1_HUMAN@1363
sp|Q9NU22|MDN1_HUMAN@1867			sp|Q9NRG9|AAAS_HUMAN@118			sp|Q969S9|RRF2M_HUMAN@329
sp|Q99570|PI3R4_HUMAN@693			sp|O60502|OGA_HUMAN@166			sp|Q8N5B7|CERS5_HUMAN@369
sp|O43172|PRP4_HUMAN@299			sp|O95478|NSA2_HUMAN@154			sp|P17655|CAN2_HUMAN@498
sp|Q08J23|NSUN2_HUMAN@502			sp|Q9H3U1|UN45A_HUMAN@663			sp|O14686|KMT2D_HUMAN@58
sp|Q8WY36|BBX_HUMAN@938			sp|Q8NCM8|DYHC2_HUMAN@2295			sp|Q9HCK1|ZDBF2_HUMAN@162
sp|Q7Z7K6|CENPV_HUMAN@219			sp|Q15154|PCM1_HUMAN@957			sp|O14802|RPC1_HUMAN@19
sp|Q8TBF2|PXL2B_HUMAN@47			sp|P51692|STA5B_HUMAN@688			sp|Q96L73|NSD1_HUMAN@1185
sp|Q92698|RAD54_HUMAN@644			sp|O95613|PCNT_HUMAN@2628			sp|Q86Y56|DAAF5_HUMAN@420
sp|O75616|ERAL1_HUMAN@150			sp|Q9BSJ2|GCP2_HUMAN@469			sp|P15121|ALDR_HUMAN@81
sp|Q9NZ71|RTEL1_HUMAN@537			sp|Q8TEX9|IPO4_HUMAN@782			sp|Q9UI12|VATH_HUMAN@312
sp|Q9BZG1|RAB34_HUMAN@67			sp|Q14684|RRP1B_HUMAN@628			sp|P21953|ODBB_HUMAN@228
sp|P46060|RAGP1_HUMAN@169			sp|P78346|RPP30_HUMAN@180			sp|P62701|RS4X_HUMAN@41
sp|P53602|MVD1_HUMAN@386			sp|Q92508|PIEZ1_HUMAN@2083			sp|Q15742|NAB2_HUMAN@499
sp|P63010|AP2B1_HUMAN@129			sp|Q9BU76|MMTA2_HUMAN@58			sp|O95602|RPA1_HUMAN@582
sp|Q7Z5J4|RAI1_HUMAN@1553			sp|Q9BQA1|MEP50_HUMAN@208			sp|Q8NFG4|FLCN_HUMAN@335
sp|O14562|UBFD1_HUMAN@185			sp|P61247|RS3A_HUMAN@96			sp|Q9C0D5|TANC1_HUMAN@131
sp|Q5UIP0|RIF1_HUMAN@312			sp|O43175|SERA_HUMAN@234			sp|P48431|SOX2_HUMAN@265
sp|O94832|MYO1D_HUMAN@143			sp|Q99700|ATX2_HUMAN@556			sp|P22455|FGFR4_HUMAN@477
sp|O15371|EIF3D_HUMAN@19			sp|P52952|NKX25_HUMAN@82			sp|O15054|KDM6B_HUMAN@921
sp|Q9H7N4|SFR19_HUMAN@950			sp|O95573|ACSL3_HUMAN@429			sp|O15228|GNPAT_HUMAN@668
sp|Q96AD5|PLPL2_HUMAN@412			sp|Q93008|USP9X_HUMAN@2387			sp|O43719|HTSF1_HUMAN@512
sp|Q6IA69|NADE_HUMAN@531			sp|Q9H0G5|NSRP1_HUMAN@171			sp|Q8WXH0|SYNE2_HUMAN@1598
sp|P20700|LMNB1_HUMAN@198			sp|O95202|LETM1_HUMAN@330			sp|P53396|ACLY_HUMAN@845
sp|Q9NRG9|AAAS_HUMAN@118			sp|P35221|CTNA1_HUMAN@337			sp|Q9C0D5|TANC1_HUMAN@209
sp|O60502|OGA_HUMAN@166			sp|Q7Z5J4|RAI1_HUMAN@828			sp|P46100|ATRX_HUMAN@1531
sp|O95478|NSA2_HUMAN@154			sp|P49189|AL9A1_HUMAN@484			sp|O75400|PR40A_HUMAN@39
sp|Q9H3U1|UN45A_HUMAN@663			sp|P18858|DNLI1_HUMAN@508			sp|Q9UM19|HPCL4_HUMAN@87
sp|P42704|LPPRC_HUMAN@690			sp|Q14149|MORC3_HUMAN@15			sp|Q9Y573|IPP_HUMAN@312
sp|Q15154|PCM1_HUMAN@957			sp|P07737|PROF1_HUMAN@17			sp|O95801|TTC4_HUMAN@160
sp|Q16342|PDCD2_HUMAN@125			sp|P39023|RL3_HUMAN@157			sp|Q92759|TF2H4_HUMAN@16
sp|P51692|STA5B_HUMAN@688			sp|Q92625|ANS1A_HUMAN@651			sp|A7E2V4|ZSWM8_HUMAN@1384
sp|O95613|PCNT_HUMAN@2628			sp|Q14191|WRN_HUMAN@1367			sp|P53384|NUBP1_HUMAN@216
sp|Q9NRA0|SPHK2_HUMAN@597			sp|Q96MW5|COG8_HUMAN@225			sp|Q96P48|ARAP1_HUMAN@128
sp|Q9BSJ2|GCP2_HUMAN@469			sp|O75821|EIF3G_HUMAN@25			sp|Q9HA47|UCK1_HUMAN@199
sp|Q8TEX9|IPO4_HUMAN@782			sp|Q9Y3B2|EXOS1_HUMAN@15			sp|Q14674|ESPL1_HUMAN@1369
sp|Q14684|RRP1B_HUMAN@628			sp|P22102|PUR2_HUMAN@298			sp|O60287|NPA1P_HUMAN@226
sp|Q9NVN8|GNL3L_HUMAN@150			sp|O94901|SUN1_HUMAN@499			sp|Q9BWU0|NADAP_HUMAN@170
sp|O75569|PRKRA_HUMAN@54			sp|P10809|CH60_HUMAN@442			sp|Q9Y3D2|MSRB2_HUMAN@169
sp|P78346|RPP30_HUMAN@180			sp|P25054|APC_HUMAN@2123			sp|Q68CP9|ARID2_HUMAN@1549
sp|P11498|PYC_HUMAN@622			sp|Q9P2X0|DPM3_HUMAN@67			sp|Q6P2Q9|PRP8_HUMAN@547
sp|Q92508|PIEZ1_HUMAN@2083			sp|A0AVT1|UBA6_HUMAN@178			sp|Q86W74|ANR46_HUMAN@104
sp|Q9BU76|MMTA2_HUMAN@58			sp|Q9ULM3|YETS2_HUMAN@102			sp|Q96RT8|GCP5_HUMAN@580
sp|O43175|SERA_HUMAN@234			sp|Q15797|SMAD1_HUMAN@378			sp|O43143|DHX15_HUMAN@226
sp|P61247|RS3A_HUMAN@96			sp|Q9NTM9|CUTC_HUMAN@248			sp|Q96F86|EDC3_HUMAN@341
sp|Q99700|ATX2_HUMAN@556			sp|P39656|OST48_HUMAN@145			sp|Q9NSV4|DIAP3_HUMAN@688
sp|P52952|NKX25_HUMAN@82			sp|Q96H55|MYO19_HUMAN@275			sp|Q6GMV2|SMYD5_HUMAN@194
sp|O95573|ACSL3_HUMAN@429			sp|O95757|HS74L_HUMAN@589			sp|Q9UJX3|APC7_HUMAN@295
sp|Q93008|USP9X_HUMAN@2387			sp|P38646|GRP75_HUMAN@487			sp|P30153|2AAA_HUMAN@174
sp|P52272|HNRPM_HUMAN@114			sp|Q9UBB9|TFP11_HUMAN@445			sp|Q9UBC2|EP15R_HUMAN@470
sp|Q9H0G5|NSRP1_HUMAN@171			sp|Q99442|SEC62_HUMAN@32			sp|Q8IV20|LACC1_HUMAN@20
sp|O95202|LETM1_HUMAN@330			sp|Q5VUA4|ZN318_HUMAN@198			sp|Q14746|COG2_HUMAN@563
sp|P49189|AL9A1_HUMAN@484			sp|O94906|PRP6_HUMAN@513			sp|P28066|PSA5_HUMAN@76
sp|Q7Z5J4|RAI1_HUMAN@828			sp|O60942|MCE1_HUMAN@565			sp|P41252|SYIC_HUMAN@120
sp|Q14149|MORC3_HUMAN@15			sp|Q86WB0|ZC3C1_HUMAN@5			sp|Q14126|DSG2_HUMAN@580
sp|P18858|DNLI1_HUMAN@508			sp|P02545|LMNA_HUMAN@522			sp|Q86WA8|LONP2_HUMAN@405
sp|P21108|PRPS3_HUMAN@165			sp|O60563|CCNT1_HUMAN@160			sp|P38398|BRCA1_HUMAN@348
sp|P35221|CTNA1_HUMAN@337			sp|Q7L2H7|EIF3M_HUMAN@134			sp|Q9H9A5|CNO10_HUMAN@633
sp|P07737|PROF1_HUMAN@17			sp|Q9H0U9|TSYL1_HUMAN@135			sp|Q9HC36|MRM3_HUMAN@290
sp|P39023|RL3_HUMAN@157			sp|P55072|TERA_HUMAN@105			sp|Q8N201|INT1_HUMAN@1433
sp|P26639|SYTC_HUMAN@467			sp|Q8NEM7|SP20H_HUMAN@255			sp|Q8N3P4|VPS8_HUMAN@588
sp|Q7KZ85|SPT6H_HUMAN@1132			sp|Q9Y3A6|TMED5_HUMAN@47			sp|Q9Y2T2|AP3M1_HUMAN@97
sp|Q92625|ANS1A_HUMAN@651			sp|Q9H3P2|NELFA_HUMAN@141			sp|P35232|PHB1_HUMAN@69
sp|Q96MW5|COG8_HUMAN@225			sp|Q8N1F7|NUP93_HUMAN@328			sp|P27695|APEX1_HUMAN@65
sp|Q8IYB8|SUV3_HUMAN@175			sp|P55212|CASP6_HUMAN@87			sp|Q8TE99|PXYP1_HUMAN@116
sp|O75821|EIF3G_HUMAN@25			sp|Q8IYU8|MICU2_HUMAN@144			sp|Q9H4G0|E41L1_HUMAN@143
sp|P22102|PUR2_HUMAN@298			sp|P51532|SMCA4_HUMAN@1205			sp|Q96AP4|ZUP1_HUMAN@389
sp|Q9Y3B2|EXOS1_HUMAN@15			sp|P43686|PRS6B_HUMAN@210			sp|Q96LW9|ZSC31_HUMAN@46
sp|O94901|SUN1_HUMAN@499			sp|Q14964|RB39A_HUMAN@185			sp|Q8TCS8|PNPT1_HUMAN@668
sp|P10809|CH60_HUMAN@442			sp|Q5H9F3|BCORL_HUMAN@1065			sp|Q5QP82|DCA10_HUMAN@412
REV_sp|Q5GJ75|TP8L3_HUMAN@13			sp|Q9NUA8|ZBT40_HUMAN@119			sp|P50851|LRBA_HUMAN@2655
sp|Q96GS4|BORC6_HUMAN@356			sp|Q13439|GOGA4_HUMAN@309			sp|Q8N3Z3|GTPB8_HUMAN@114
sp|Q9P2X0|DPM3_HUMAN@67			sp|Q8N201|INT1_HUMAN@867			sp|P29597|TYK2_HUMAN@936
sp|A0AVT1|UBA6_HUMAN@178			sp|Q7Z4Q2|HEAT3_HUMAN@20			sp|Q9NYY8|FAKD2_HUMAN@163
sp|Q9ULM3|YETS2_HUMAN@102			sp|Q8IXI2|MIRO1_HUMAN@350			sp|Q15032|R3HD1_HUMAN@304
sp|Q9NTM9|CUTC_HUMAN@248			sp|P55039|DRG2_HUMAN@270			sp|Q13444|ADA15_HUMAN@409
sp|P39656|OST48_HUMAN@145			sp|O60281|ZN292_HUMAN@253			sp|Q86XA9|HTR5A_HUMAN@841
sp|O95757|HS74L_HUMAN@589			sp|P78337|PITX1_HUMAN@156			sp|P09311|US10_VZVD@78
sp|Q96H55|MYO19_HUMAN@275			sp|Q9UBI1|COMD3_HUMAN@90			sp|P38398|BRCA1_HUMAN@953
sp|P38646|GRP75_HUMAN@487			sp|Q7Z3E2|CC186_HUMAN@661			sp|Q96KB5|TOPK_HUMAN@70
sp|Q9UBB9|TFP11_HUMAN@445			sp|Q14204|DYHC1_HUMAN@978			sp|P17017|ZNF14_HUMAN@262
sp|Q99442|SEC62_HUMAN@32			sp|P49848|TAF6_HUMAN@460			sp|Q15334|L2GL1_HUMAN@505
sp|O94906|PRP6_HUMAN@513			sp|Q8NB90|AFG2A_HUMAN@291			sp|P49915|GUAA_HUMAN@530
sp|O60942|MCE1_HUMAN@565			sp|Q9UNH7|SNX6_HUMAN@264			sp|P67870|CSK2B_HUMAN@109
sp|P02545|LMNA_HUMAN@522			sp|Q9NWS9|ZN446_HUMAN@164			sp|Q8WWK9|CKAP2_HUMAN@648
sp|O60563|CCNT1_HUMAN@160			sp|Q15370|ELOB_HUMAN@60			sp|Q9UKU7|ACAD8_HUMAN@159
sp|Q7L2H7|EIF3M_HUMAN@134			sp|P54198|HIRA_HUMAN@867			sp|A6NNY8|UBP27_HUMAN@38
sp|Q12968|NFAC3_HUMAN@271			sp|Q5T280|CI114_HUMAN@151			sp|Q01518|CAP1_HUMAN@93
sp|P82675|RT05_HUMAN@211			sp|Q8N999|RLIG1_HUMAN@63			sp|P61106|RAB14_HUMAN@40
sp|P55072|TERA_HUMAN@105			sp|Q6DT37|MRCKG_HUMAN@513			sp|A4D1P6|WDR91_HUMAN@351
sp|O95870|ABHGA_HUMAN@248			sp|Q9HAV4|XPO5_HUMAN@1052			sp|Q9UL63|MKLN1_HUMAN@82
sp|Q9Y3A6|TMED5_HUMAN@47			sp|Q14207|NPAT_HUMAN@1002			sp|O43291|SPIT2_HUMAN@166
sp|Q8TAP8|PPR35_HUMAN@142			sp|Q6PIY7|GLD2_HUMAN@225			sp|Q13616|CUL1_HUMAN@496
sp|Q9H3P2|NELFA_HUMAN@141			sp|Q6PCE3|PGM2L_HUMAN@125			sp|Q9Y4A5|TRRAP_HUMAN@1879
sp|Q8NAN2|MIGA1_HUMAN@509			sp|P09936|UCHL1_HUMAN@152			sp|Q8N7H5|PAF1_HUMAN@218
sp|Q8N1F7|NUP93_HUMAN@328			sp|Q9BQG0|MBB1A_HUMAN@338			sp|O60518|RNBP6_HUMAN@952
sp|O95218|ZRAB2_HUMAN@88			sp|O95602|RPA1_HUMAN@937			sp|Q8IXT5|RB12B_HUMAN@919
sp|P17509|HXB6_HUMAN@137			sp|Q9Y366|IFT52_HUMAN@374			sp|Q13315|ATM_HUMAN@384
sp|O60264|SMCA5_HUMAN@374			sp|P50454|SERPH_HUMAN@156			sp|Q16877|F264_HUMAN@29
sp|Q8IYU8|MICU2_HUMAN@144			sp|Q14442|PIGH_HUMAN@11			sp|O95239|KIF4A_HUMAN@269
sp|Q14789|GOGB1_HUMAN@1569			sp|Q15392|DHC24_HUMAN@499			sp|P23470|PTPRG_HUMAN@988
sp|P51532|SMCA4_HUMAN@1205			sp|Q86YS7|C2CD5_HUMAN@142			sp|Q9BRR6|ADPGK_HUMAN@178
sp|Q5H9F3|BCORL_HUMAN@1065			sp|Q32MZ4|LRRF1_HUMAN@334			sp|Q16513|PKN2_HUMAN@131
sp|P43686|PRS6B_HUMAN@210			sp|Q93008|USP9X_HUMAN@1451			sp|Q29RF7|PDS5A_HUMAN@14
sp|Q9NUA8|ZBT40_HUMAN@119			sp|Q9Y6D5|BIG2_HUMAN@36			sp|Q16842|SIA4B_HUMAN@149
sp|Q13439|GOGA4_HUMAN@309			sp|Q9P287|BCCIP_HUMAN@213			sp|Q9NU22|MDN1_HUMAN@1867
sp|Q8N201|INT1_HUMAN@867			sp|Q9Y4B6|DCAF1_HUMAN@1070			sp|Q6P1L5|F117B_HUMAN@496
sp|Q7Z4Q2|HEAT3_HUMAN@20			sp|Q92576|PHF3_HUMAN@561			sp|Q86Y56|DAAF5_HUMAN@349
sp|Q8IXI2|MIRO1_HUMAN@350			sp|Q3YEC7|RABL6_HUMAN@172			sp|Q9BQG0|MBB1A_HUMAN@890
sp|P23246|SFPQ_HUMAN@431			sp|P45954|ACDSB_HUMAN@261			sp|Q8IX90|SKA3_HUMAN@20
sp|Q9UBI1|COMD3_HUMAN@90			sp|Q6UX07|DHR13_HUMAN@128			sp|O43172|PRP4_HUMAN@299
sp|Q7Z3E2|CC186_HUMAN@661			sp|Q8NE71|ABCF1_HUMAN@741			sp|Q9UPU5|UBP24_HUMAN@995
sp|Q9Y5M8|SRPRB_HUMAN@73			sp|Q96RL1|UIMC1_HUMAN@691			sp|Q96G28|CFA36_HUMAN@83
sp|Q96QC0|PP1RA_HUMAN@463			sp|Q96HS1|PGAM5_HUMAN@168			sp|O60902|SHOX2_HUMAN@217
sp|Q14204|DYHC1_HUMAN@978			sp|Q9UGU0|TCF20_HUMAN@868			sp|Q08J23|NSUN2_HUMAN@502
sp|P49848|TAF6_HUMAN@460			sp|O00148|DX39A_HUMAN@223			sp|Q8WYP5|ELYS_HUMAN@693
sp|Q8NB90|AFG2A_HUMAN@291			sp|O95292|VAPB_HUMAN@173			sp|O14524|NEMP1_HUMAN@67
sp|Q9UNH7|SNX6_HUMAN@264			sp|Q9H9Y6|RPA2_HUMAN@1061			sp|Q8WY36|BBX_HUMAN@938
sp|P33527|MRP1_HUMAN@208			sp|P54136|SYRC_HUMAN@502			sp|Q8N2W9|PIAS4_HUMAN@164
sp|Q9NWS9|ZN446_HUMAN@164			sp|O15381|NVL_HUMAN@484			sp|Q7Z7K6|CENPV_HUMAN@219
sp|Q8NEY1|NAV1_HUMAN@1446			sp|P54132|BLM_HUMAN@468			sp|Q7Z7A3|CTU1_HUMAN@210
sp|Q15370|ELOB_HUMAN@60			sp|O75879|GATB_HUMAN@322			sp|Q8TBF2|PXL2B_HUMAN@47
sp|P54198|HIRA_HUMAN@867			sp|Q13263|TIF1B_HUMAN@628			sp|Q9H0C8|ILKAP_HUMAN@312
sp|Q5T2E6|ARMD3_HUMAN@480			sp|P19367|HXK1_HUMAN@813			sp|Q6PKG0|LARP1_HUMAN@60
sp|Q9HAV4|XPO5_HUMAN@1052			sp|Q9NZJ0|DTL_HUMAN@379			sp|Q92698|RAD54_HUMAN@644
sp|Q14207|NPAT_HUMAN@1002			sp|Q9P2N5|RBM27_HUMAN@776			sp|O75616|ERAL1_HUMAN@150
sp|Q6PIY7|GLD2_HUMAN@225			sp|Q9UKX7|NUP50_HUMAN@333			sp|Q9NZ71|RTEL1_HUMAN@537
sp|Q6PCE3|PGM2L_HUMAN@125			sp|Q8WUB8|PHF10_HUMAN@134			sp|Q63HN8|RN213_HUMAN@2620
sp|P09936|UCHL1_HUMAN@152			sp|Q14202|ZMYM3_HUMAN@557			sp|P15104|GLNA_HUMAN@99
sp|Q9BQG0|MBB1A_HUMAN@338			sp|Q03001|DYST_HUMAN@5080			sp|Q9BZG1|RAB34_HUMAN@67
sp|O95602|RPA1_HUMAN@937			sp|Q96KR1|ZFR_HUMAN@812			sp|P16885|PLCG2_HUMAN@624
sp|P50454|SERPH_HUMAN@156			sp|O60264|SMCA5_HUMAN@527			sp|P46060|RAGP1_HUMAN@169
sp|Q9Y366|IFT52_HUMAN@374			sp|P38606|VATA_HUMAN@254			sp|Q8IVD9|NUDC3_HUMAN@260
sp|O14976|GAK_HUMAN@472			sp|O95801|TTC4_HUMAN@149			sp|Q86W56|PARG_HUMAN@711
sp|P53621|COPA_HUMAN@975			sp|Q6ZRQ5|MMS22_HUMAN@121			sp|Q86WJ1|CHD1L_HUMAN@67
sp|Q14442|PIGH_HUMAN@11			sp|O60885|BRD4_HUMAN@674			sp|P53602|MVD1_HUMAN@386
sp|Q15392|DHC24_HUMAN@499			sp|Q6NXE6|ARMC6_HUMAN@297			sp|Q14146|URB2_HUMAN@120
sp|Q6PL18|ATAD2_HUMAN@1388			sp|O15067|PUR4_HUMAN@108			sp|Q7Z5J4|RAI1_HUMAN@1553
sp|P52788|SPSY_HUMAN@337			sp|P08238|HS90B_HUMAN@590			sp|O14562|UBFD1_HUMAN@185
sp|Q93008|USP9X_HUMAN@1451			sp|O75369|FLNB_HUMAN@2115			sp|Q5UIP0|RIF1_HUMAN@312
sp|Q32MZ4|LRRF1_HUMAN@334			sp|Q9BYP7|WNK3_HUMAN@735			sp|Q5T1V6|DDX59_HUMAN@414
sp|Q9Y6D5|BIG2_HUMAN@36			sp|Q9HD26|GOPC_HUMAN@408			sp|O94832|MYO1D_HUMAN@143
sp|Q9P287|BCCIP_HUMAN@213			sp|P21796|VDAC1_HUMAN@127			sp|O15371|EIF3D_HUMAN@19
sp|Q9Y4B6|DCAF1_HUMAN@1070			sp|Q8IXW5|RPAP2_HUMAN@288			sp|Q9BXW9|FACD2_HUMAN@801
sp|O75179|ANR17_HUMAN@564			sp|Q9C0D5|TANC1_HUMAN@557			sp|Q9UMZ2|SYNRG_HUMAN@1134
sp|Q92576|PHF3_HUMAN@561			sp|Q9NVH0|EXD2_HUMAN@202			sp|P48651|PTSS1_HUMAN@4
sp|Q3YEC7|RABL6_HUMAN@172			sp|Q7Z333|SETX_HUMAN@2646			sp|Q9Y6R0|NUMBL_HUMAN@161
sp|P45954|ACDSB_HUMAN@261			sp|Q9HC52|CBX8_HUMAN@142			sp|Q9P215|POGK_HUMAN@218
sp|Q6UX07|DHR13_HUMAN@128			sp|Q92878|RAD50_HUMAN@1296			sp|Q9H7N4|SFR19_HUMAN@950
sp|Q8NE71|ABCF1_HUMAN@741			sp|Q15041|AR6P1_HUMAN@109			sp|Q96AD5|PLPL2_HUMAN@412
sp|Q96RL1|UIMC1_HUMAN@691			sp|Q14409|GLPK3_HUMAN@293			sp|Q6YN16|HSDL2_HUMAN@136
sp|P16729|MCP_HCMVA@552			sp|Q5TA50|CPTP_HUMAN@105			sp|Q9BY49|PECR_HUMAN@79
sp|Q96HS1|PGAM5_HUMAN@168			sp|Q9UKK9|NUDT5_HUMAN@76			sp|P20700|LMNB1_HUMAN@198
sp|Q9UGU0|TCF20_HUMAN@868			sp|Q9NWQ8|PHAG1_HUMAN@355			sp|Q6IA69|NADE_HUMAN@531
sp|O00148|DX39A_HUMAN@223			sp|Q00587|BORG5_HUMAN@161			sp|Q9NRG9|AAAS_HUMAN@118
sp|O95292|VAPB_HUMAN@173			sp|Q92698|RAD54_HUMAN@64			sp|O60502|OGA_HUMAN@166
sp|Q9H9Y6|RPA2_HUMAN@1061			sp|Q9BWU0|NADAP_HUMAN@676			sp|O95478|NSA2_HUMAN@154
sp|P54136|SYRC_HUMAN@502			sp|P15924|DESP_HUMAN@798			sp|Q8NCM8|DYHC2_HUMAN@2295
sp|O15381|NVL_HUMAN@484			sp|O14654|IRS4_HUMAN@545			sp|Q9H3U1|UN45A_HUMAN@663
sp|P54132|BLM_HUMAN@468			sp|P25054|APC_HUMAN@1387			sp|Q92538|GBF1_HUMAN@1767
sp|P19367|HXK1_HUMAN@813			sp|P68104|EF1A1_HUMAN@234			sp|Q96Q89|KI20B_HUMAN@379
sp|Q9NZJ0|DTL_HUMAN@379			sp|O75367|H2AY_HUMAN@273			sp|Q15154|PCM1_HUMAN@957
sp|Q9P2N5|RBM27_HUMAN@776			sp|Q7Z4W1|DCXR_HUMAN@138			sp|Q16342|PDCD2_HUMAN@125
sp|Q9UKX7|NUP50_HUMAN@333			sp|Q9H0A8|COMD4_HUMAN@107			sp|P51692|STA5B_HUMAN@688
sp|Q8WUB8|PHF10_HUMAN@134			sp|Q5JPE7|NOMO2_HUMAN@788			sp|O95613|PCNT_HUMAN@2628
sp|Q14202|ZMYM3_HUMAN@557			sp|Q9UHB9|SRP68_HUMAN@525			sp|Q9NRA0|SPHK2_HUMAN@597
sp|P49815|TSC2_HUMAN@1755			sp|Q9BQE3|TBA1C_HUMAN@25			sp|Q8TEX9|IPO4_HUMAN@782
sp|Q86XL3|ANKL2_HUMAN@702			sp|Q96RE7|NACC1_HUMAN@416			sp|P55084|ECHB_HUMAN@458
sp|Q96KR1|ZFR_HUMAN@812			sp|Q99741|CDC6_HUMAN@44			sp|Q14684|RRP1B_HUMAN@628
sp|O60264|SMCA5_HUMAN@527			sp|Q9Y315|DEOC_HUMAN@100			sp|Q9Y5S2|MRCKB_HUMAN@1378
sp|P38606|VATA_HUMAN@254			sp|P51617|IRAK1_HUMAN@225			sp|Q9NVN8|GNL3L_HUMAN@150
sp|O95801|TTC4_HUMAN@149			sp|Q6ZRS2|SRCAP_HUMAN@867			sp|O60566|BUB1B_HUMAN@656
sp|Q7Z3B4|NUP54_HUMAN@171			sp|Q6NUQ4|TM214_HUMAN@529			sp|P78346|RPP30_HUMAN@180
sp|Q9NU22|MDN1_HUMAN@43			sp|P27708|PYR1_HUMAN@2092			sp|P11498|PYC_HUMAN@622
sp|Q9Y324|FCF1_HUMAN@134			sp|Q8TAQ2|SMRC2_HUMAN@145			sp|Q9UNE7|CHIP_HUMAN@69
sp|O60885|BRD4_HUMAN@674			sp|Q9NV66|TYW1_HUMAN@504			sp|Q9BU76|MMTA2_HUMAN@58
sp|O15067|PUR4_HUMAN@108			sp|Q9H583|HEAT1_HUMAN@1143			sp|Q15021|CND1_HUMAN@121
sp|P08238|HS90B_HUMAN@590			sp|Q08257|QOR_HUMAN@45			sp|Q9C037|TRIM4_HUMAN@87
sp|O75369|FLNB_HUMAN@2115			sp|Q5T3I0|GPTC4_HUMAN@152			sp|Q9BWS9|CHID1_HUMAN@68
sp|Q9BYP7|WNK3_HUMAN@735			sp|Q9H4K7|MTG2_HUMAN@206			sp|Q15813|TBCE_HUMAN@522
sp|Q9HD26|GOPC_HUMAN@408			sp|Q07002|CDK18_HUMAN@185			sp|O43175|SERA_HUMAN@234
sp|P21796|VDAC1_HUMAN@127			sp|Q6KC79|NIPBL_HUMAN@56			sp|P61247|RS3A_HUMAN@96
sp|P49588|SYAC_HUMAN@903			sp|Q5JTH9|RRP12_HUMAN@102			sp|Q99700|ATX2_HUMAN@556
sp|Q8IXW5|RPAP2_HUMAN@288			sp|P22415|USF1_HUMAN@229			sp|Q7Z3F1|LYCHS_HUMAN@629
sp|P98170|XIAP_HUMAN@12			sp|P63261|ACTG_HUMAN@272			sp|P52952|NKX25_HUMAN@82
sp|P02649|APOE_HUMAN@130			sp|P51148|RAB5C_HUMAN@64			sp|O95573|ACSL3_HUMAN@429
sp|O43426|SYNJ1_HUMAN@1531			sp|Q9UII5|ZN107_HUMAN@647			sp|O95260|ATE1_HUMAN@138
sp|Q9C0D5|TANC1_HUMAN@557			sp|Q09161|NCBP1_HUMAN@728			sp|O14686|KMT2D_HUMAN@5338
sp|Q9NVH0|EXD2_HUMAN@202			sp|Q9Y3D5|RT18C_HUMAN@100			sp|Q9Y4D8|HECD4_HUMAN@1406
sp|Q9HC52|CBX8_HUMAN@142			sp|O95757|HS74L_HUMAN@270			sp|Q02218|ODO1_HUMAN@507
sp|O15027|SC16A_HUMAN@1811			sp|O75928|PIAS2_HUMAN@490			sp|P52272|HNRPM_HUMAN@114
sp|Q92878|RAD50_HUMAN@1296			sp|P53582|MAP11_HUMAN@25			sp|Q9Y2F5|ICE1_HUMAN@509
sp|Q15041|AR6P1_HUMAN@109			sp|Q9UBK7|RBL2A_HUMAN@128			sp|Q9H0G5|NSRP1_HUMAN@171
sp|Q14409|GLPK3_HUMAN@293			sp|Q96GS4|BORC6_HUMAN@242			sp|O95202|LETM1_HUMAN@330
sp|Q5TA50|CPTP_HUMAN@105			sp|O00429|DNM1L_HUMAN@431			sp|P49189|AL9A1_HUMAN@484
sp|Q9UKK9|NUDT5_HUMAN@76			sp|Q7Z2K8|GRIN1_HUMAN@778			sp|P35221|CTNA1_HUMAN@337
sp|Q9NWQ8|PHAG1_HUMAN@355			sp|Q9Y5X3|SNX5_HUMAN@347			sp|Q9Y4E8|UBP15_HUMAN@570
sp|Q00587|BORG5_HUMAN@161			sp|O95835|LATS1_HUMAN@850			sp|Q9C0E2|XPO4_HUMAN@492
sp|Q92698|RAD54_HUMAN@64			sp|Q93008|USP9X_HUMAN@193			sp|P18858|DNLI1_HUMAN@508
sp|Q9BWU0|NADAP_HUMAN@676			sp|Q9BV44|THUM3_HUMAN@239			sp|Q14149|MORC3_HUMAN@15
sp|Q9Y5J1|UTP18_HUMAN@241			sp|P12235|ADT1_HUMAN@160			sp|Q7Z5J4|RAI1_HUMAN@828
sp|P15924|DESP_HUMAN@798			sp|Q9UBU7|DBF4A_HUMAN@135			sp|P39023|RL3_HUMAN@157
sp|O14654|IRS4_HUMAN@545			sp|Q66PJ3|AR6P4_HUMAN@226			sp|Q7KZ85|SPT6H_HUMAN@1132
sp|P25054|APC_HUMAN@1387			sp|P61225|RAP2B_HUMAN@140			sp|Q92625|ANS1A_HUMAN@651
sp|P68104|EF1A1_HUMAN@234			sp|Q96EP5|DAZP1_HUMAN@124			sp|Q6PKC3|TXD11_HUMAN@770
sp|Q7Z4W1|DCXR_HUMAN@138			sp|P30038|AL4A1_HUMAN@315			sp|Q14191|WRN_HUMAN@1367
sp|Q9H0A8|COMD4_HUMAN@107			sp|Q8N201|INT1_HUMAN@1440			sp|Q96MW5|COG8_HUMAN@225
sp|O94973|AP2A2_HUMAN@267			sp|Q9NX08|COMD8_HUMAN@32			sp|Q8IYB8|SUV3_HUMAN@175
sp|Q9UIG0|BAZ1B_HUMAN@941			sp|P78527|PRKDC_HUMAN@795			sp|O75821|EIF3G_HUMAN@25
sp|Q5JPE7|NOMO2_HUMAN@788			sp|O60502|OGA_HUMAN@62			sp|P22102|PUR2_HUMAN@298
sp|Q9UHB9|SRP68_HUMAN@525			sp|Q9NTI5|PDS5B_HUMAN@340			sp|Q8IYA6|CKP2L_HUMAN@124
sp|Q96RE7|NACC1_HUMAN@416			sp|P26641|EF1G_HUMAN@194			sp|P49454|CENPF_HUMAN@1721
sp|Q99741|CDC6_HUMAN@44			sp|Q96BJ3|AIDA_HUMAN@69			sp|P10809|CH60_HUMAN@442
sp|P51617|IRAK1_HUMAN@225			sp|Q8IWS0|PHF6_HUMAN@305			sp|P25054|APC_HUMAN@2123
sp|Q6ZRS2|SRCAP_HUMAN@867			sp|Q969Z0|FAKD4_HUMAN@246			sp|O94901|SUN1_HUMAN@499
sp|Q6NUQ4|TM214_HUMAN@529			sp|Q9Y3T9|NOC2L_HUMAN@585			sp|Q8NE62|CHDH_HUMAN@99
sp|Q8TAQ2|SMRC2_HUMAN@145			sp|O00303|EIF3F_HUMAN@256			sp|Q96GS4|BORC6_HUMAN@356
sp|Q15276|RABE1_HUMAN@350			sp|Q9UL45|BL1S6_HUMAN@95			sp|Q9P2X0|DPM3_HUMAN@67
sp|Q9H583|HEAT1_HUMAN@1143			sp|Q9Y6K9|NEMO_HUMAN@76			sp|Q9BYD3|RM04_HUMAN@311
sp|Q9H334|FOXP1_HUMAN@341			sp|Q14573|ITPR3_HUMAN@2668			sp|Q07866|KLC1_HUMAN@559
sp|Q08257|QOR_HUMAN@45			sp|Q13347|EIF3I_HUMAN@76			sp|A0AVT1|UBA6_HUMAN@178
sp|Q5T3I0|GPTC4_HUMAN@152			sp|O60333|KIF1B_HUMAN@600			sp|Q8N3C0|ASCC3_HUMAN@690
sp|Q9UQR1|ZN148_HUMAN@14			sp|O75792|RNH2A_HUMAN@181			sp|Q9ULM3|YETS2_HUMAN@102
sp|Q9H4K7|MTG2_HUMAN@206			sp|P04637|P53_HUMAN@135			sp|Q9BUK6|MSTO1_HUMAN@411
sp|Q07002|CDK18_HUMAN@185			sp|Q7L576|CYFP1_HUMAN@1241			sp|Q9NTM9|CUTC_HUMAN@248
sp|P12955|PEPD_HUMAN@58			sp|P04035|HMDH_HUMAN@883			sp|Q6NUN9|ZN746_HUMAN@385
sp|Q5JTH9|RRP12_HUMAN@102			sp|P08581|MET_HUMAN@1107			sp|O95757|HS74L_HUMAN@589
sp|P22415|USF1_HUMAN@229			sp|Q9UKX7|NUP50_HUMAN@181			sp|P38646|GRP75_HUMAN@487
sp|P63261|ACTG_HUMAN@272			sp|Q9NPG3|UBN1_HUMAN@837			sp|Q9UBB9|TFP11_HUMAN@445
sp|Q9P2D1|CHD7_HUMAN@1816			sp|Q12788|TBL3_HUMAN@129			sp|Q99442|SEC62_HUMAN@32
sp|P51148|RAB5C_HUMAN@64			sp|O94762|RECQ5_HUMAN@832			sp|Q9NW13|RBM28_HUMAN@490
sp|Q5TGY3|AHDC1_HUMAN@689			sp|Q8N9T8|KRI1_HUMAN@531			sp|O60942|MCE1_HUMAN@565
sp|Q9Y3D5|RT18C_HUMAN@100			sp|O75448|MED24_HUMAN@110			sp|P42702|LIFR_HUMAN@889
sp|O95757|HS74L_HUMAN@270			sp|P42704|LPPRC_HUMAN@208			sp|Q96T23|RSF1_HUMAN@425
sp|P53582|MAP11_HUMAN@25			sp|P52815|RM12_HUMAN@45			sp|P27815|PDE4A_HUMAN@218
sp|Q76N32|CEP68_HUMAN@465			sp|Q9GZR2|REXO4_HUMAN@248			sp|Q86WB0|ZC3C1_HUMAN@5
sp|Q9UBK7|RBL2A_HUMAN@128			sp|O43815|STRN_HUMAN@665			sp|P02545|LMNA_HUMAN@522
sp|Q96GS4|BORC6_HUMAN@242			sp|Q8NFW8|NEUA_HUMAN@432			sp|O60563|CCNT1_HUMAN@160
sp|O00429|DNM1L_HUMAN@431			sp|O15321|TM9S1_HUMAN@445			sp|P42858|HD_HUMAN@2747
sp|Q7Z2K8|GRIN1_HUMAN@778			sp|P51151|RAB9A_HUMAN@142			sp|Q7L2H7|EIF3M_HUMAN@134
sp|O00429|DNM1L_HUMAN@300			sp|P55347|PKNX1_HUMAN@326			sp|Q9H0U9|TSYL1_HUMAN@135
sp|Q9Y5X3|SNX5_HUMAN@347			sp|Q14C86|GAPD1_HUMAN@1160			sp|O95396|MOCS3_HUMAN@412
sp|Q8NEM2|SHCBP_HUMAN@612			sp|O14981|BTAF1_HUMAN@908			sp|P16333|NCK1_HUMAN@340
sp|Q93008|USP9X_HUMAN@193			sp|Q07955|SRSF1_HUMAN@148			sp|P21580|TNAP3_HUMAN@200
sp|Q9BV44|THUM3_HUMAN@239			sp|Q9Y6D9|MD1L1_HUMAN@134			sp|Q12968|NFAC3_HUMAN@271
sp|P12235|ADT1_HUMAN@160			sp|Q14008|CKAP5_HUMAN@427			sp|Q8NEM7|SP20H_HUMAN@255
sp|Q9UBU7|DBF4A_HUMAN@135			sp|Q8NE01|CNNM3_HUMAN@376			sp|P55072|TERA_HUMAN@105
sp|Q66PJ3|AR6P4_HUMAN@226			sp|Q8IWT3|CUL9_HUMAN@1340			sp|Q562F6|SGO2_HUMAN@813
sp|P61225|RAP2B_HUMAN@140			sp|Q7Z6Z7|HUWE1_HUMAN@3259			sp|Q04727|TLE4_HUMAN@624
sp|P27797|CALR_HUMAN@163			sp|P37287|PIGA_HUMAN@28			sp|Q8TAP8|PPR35_HUMAN@142
sp|P30038|AL4A1_HUMAN@315			sp|Q9NU22|MDN1_HUMAN@4259			sp|Q9Y3A6|TMED5_HUMAN@47
sp|P78527|PRKDC_HUMAN@795			sp|P78417|GSTO1_HUMAN@192			sp|Q9H3P2|NELFA_HUMAN@141
sp|Q8N201|INT1_HUMAN@1440			sp|Q8N0S6|CENPL_HUMAN@52			sp|P49585|PCY1A_HUMAN@37
sp|Q15813|TBCE_HUMAN@301			sp|P28340|DPOD1_HUMAN@873			sp|Q9Y4L1|HYOU1_HUMAN@805
sp|O60502|OGA_HUMAN@62			sp|Q8N3F8|MILK1_HUMAN@801			sp|Q56NI9|ESCO2_HUMAN@263
sp|P26641|EF1G_HUMAN@194			sp|Q9UHV7|MED13_HUMAN@681			sp|Q86V59|PNM8A_HUMAN@295
sp|Q96BJ3|AIDA_HUMAN@69			sp|Q0D2I5|IFFO1_HUMAN@149			sp|Q9Y693|LHPL6_HUMAN@50
sp|Q9NXJ5|PGPI_HUMAN@206			sp|Q6FI81|CPIN1_HUMAN@277			sp|Q96DI7|SNR40_HUMAN@291
sp|Q969Z0|FAKD4_HUMAN@246			sp|O75691|UTP20_HUMAN@313			sp|Q8N1F7|NUP93_HUMAN@328
sp|Q9Y3T9|NOC2L_HUMAN@585			sp|O60610|DIAP1_HUMAN@796			sp|Q9ULK4|MED23_HUMAN@238
sp|O00303|EIF3F_HUMAN@256			sp|Q9Y4B6|DCAF1_HUMAN@106			sp|O95218|ZRAB2_HUMAN@88
sp|Q15643|TRIPB_HUMAN@726			sp|O00116|ADAS_HUMAN@214			sp|O95714|HERC2_HUMAN@4517
sp|Q6IA69|NADE_HUMAN@686			sp|Q5T4S7|UBR4_HUMAN@104			sp|P17509|HXB6_HUMAN@137
sp|Q14573|ITPR3_HUMAN@2668			sp|P61513|RL37A_HUMAN@42			sp|O43609|SPY1_HUMAN@305
sp|Q13347|EIF3I_HUMAN@76			sp|P45974|UBP5_HUMAN@195			sp|P08411|POLN_SFV@96
sp|O60333|KIF1B_HUMAN@600			sp|Q8WUW1|BRK1_HUMAN@43			sp|Q8IYU8|MICU2_HUMAN@144
sp|Q7L3B6|CD37L_HUMAN@124			sp|P46937|YAP1_HUMAN@343			sp|Q14789|GOGB1_HUMAN@1569
sp|Q96R06|SPAG5_HUMAN@822			sp|Q13310|PABP4_HUMAN@494			sp|O95155|UBE4B_HUMAN@1164
sp|O75792|RNH2A_HUMAN@181			sp|Q9ULM3|YETS2_HUMAN@565			sp|P43686|PRS6B_HUMAN@210
sp|Q7L576|CYFP1_HUMAN@1241			sp|Q96H55|MYO19_HUMAN@515			sp|P21980|TGM2_HUMAN@230
sp|P04035|HMDH_HUMAN@883			sp|Q93074|MED12_HUMAN@1006			sp|Q9NUA8|ZBT40_HUMAN@119
sp|P08581|MET_HUMAN@1107			sp|P53350|PLK1_HUMAN@212			sp|Q96R06|SPAG5_HUMAN@907
sp|O43439|MTG8R_HUMAN@261			sp|Q9Y6N7|ROBO1_HUMAN@1437			sp|Q8N201|INT1_HUMAN@867
sp|Q9UKX7|NUP50_HUMAN@181			sp|P62195|PRS8_HUMAN@363			REV_sp|Q5S007|LRRK2_HUMAN@2279
sp|Q12788|TBL3_HUMAN@129			sp|P33993|MCM7_HUMAN@378			sp|Q7Z4Q2|HEAT3_HUMAN@20
sp|O94762|RECQ5_HUMAN@832			sp|Q16531|DDB1_HUMAN@128			sp|Q8IXI2|MIRO1_HUMAN@350
sp|Q8N9T8|KRI1_HUMAN@531			sp|P53350|PLK1_HUMAN@67			sp|Q99496|RING2_HUMAN@179
sp|Q92830|KAT2A_HUMAN@695			sp|Q96DT7|ZBT10_HUMAN@248			sp|Q9NVE7|PANK4_HUMAN@537
sp|O75448|MED24_HUMAN@110			sp|O00541|PESC_HUMAN@361			sp|P55039|DRG2_HUMAN@270
sp|P42704|LPPRC_HUMAN@208			sp|Q9NRL2|BAZ1A_HUMAN@970			sp|P23246|SFPQ_HUMAN@431
sp|P52815|RM12_HUMAN@45			sp|Q12830|BPTF_HUMAN@445			sp|P78337|PITX1_HUMAN@156
sp|Q9GZR2|REXO4_HUMAN@248			sp|P52948|NUP98_HUMAN@1590			sp|Q15386|UBE3C_HUMAN@936
sp|O43815|STRN_HUMAN@665			sp|Q8N1G0|ZN687_HUMAN@1003			sp|Q9UBI1|COMD3_HUMAN@90
sp|Q8NFW8|NEUA_HUMAN@432			sp|P04080|CYTB_HUMAN@3			sp|Q9UGP8|SEC63_HUMAN@671
sp|Q6ZVH7|ESPNL_HUMAN@629			sp|Q9H410|DSN1_HUMAN@287			sp|Q9Y5M8|SRPRB_HUMAN@73
sp|Q13111|CAF1A_HUMAN@202			sp|O75152|ZC11A_HUMAN@431			sp|Q9BXY0|MAK16_HUMAN@44
sp|O15321|TM9S1_HUMAN@445			sp|A0AVT1|UBA6_HUMAN@347			sp|Q14204|DYHC1_HUMAN@978
sp|P55347|PKNX1_HUMAN@326			sp|Q9UBW7|ZMYM2_HUMAN@612			sp|P49848|TAF6_HUMAN@460
sp|Q07955|SRSF1_HUMAN@148			sp|P27708|PYR1_HUMAN@868			sp|Q96QC0|PP1RA_HUMAN@463
sp|O14981|BTAF1_HUMAN@908			sp|O75351|VPS4B_HUMAN@240			sp|Q13444|ADA15_HUMAN@657
sp|Q13459|MYO9B_HUMAN@2028			sp|O15294|OGT1_HUMAN@315			sp|P21741|MK_HUMAN@94
sp|Q9Y3F4|STRAP_HUMAN@340			sp|Q15032|R3HD1_HUMAN@858			sp|Q8NB90|AFG2A_HUMAN@291
sp|Q14008|CKAP5_HUMAN@427			sp|P49137|MAPK2_HUMAN@98			sp|Q9UNH7|SNX6_HUMAN@264
sp|Q5T481|RBM20_HUMAN@1099			sp|Q13509|TBB3_HUMAN@12			sp|Q5BJF6|ODFP2_HUMAN@206
sp|Q8NE01|CNNM3_HUMAN@376			sp|Q06124|PTN11_HUMAN@259			sp|P33527|MRP1_HUMAN@208
sp|O95155|UBE4B_HUMAN@563			sp|Q9BT40|INP5K_HUMAN@173			sp|P35237|SPB6_HUMAN@370
sp|Q7Z6Z7|HUWE1_HUMAN@3259			sp|O95067|CCNB2_HUMAN@314			sp|Q8NEY1|NAV1_HUMAN@1446
sp|P37287|PIGA_HUMAN@28			sp|Q5T4S7|UBR4_HUMAN@3414			sp|Q15370|ELOB_HUMAN@60
sp|Q9NU22|MDN1_HUMAN@4259			sp|Q15154|PCM1_HUMAN@876			sp|P54198|HIRA_HUMAN@867
sp|Q5H9F3|BCORL_HUMAN@1101			sp|Q8TAQ2|SMRC2_HUMAN@486			sp|Q5T280|CI114_HUMAN@151
sp|P78417|GSTO1_HUMAN@192			sp|O00257|CBX4_HUMAN@185			sp|Q9HAV4|XPO5_HUMAN@1052
sp|Q8N0S6|CENPL_HUMAN@52			sp|Q86U86|PB1_HUMAN@50			sp|Q14207|NPAT_HUMAN@1002
sp|Q96JG6|VPS50_HUMAN@430			sp|O75122|CLAP2_HUMAN@528			sp|O60333|KIF1B_HUMAN@1635
sp|P28340|DPOD1_HUMAN@873			sp|Q9P2I0|CPSF2_HUMAN@311			sp|Q14789|GOGB1_HUMAN@2279
sp|Q9UHV7|MED13_HUMAN@681			sp|P34932|HSP74_HUMAN@380			sp|Q6PIY7|GLD2_HUMAN@225
sp|Q6FI81|CPIN1_HUMAN@277			sp|Q96N67|DOCK7_HUMAN@457			sp|P09936|UCHL1_HUMAN@152
sp|O75691|UTP20_HUMAN@313			sp|Q9C0A6|SETD5_HUMAN@780			sp|O95602|RPA1_HUMAN@937
sp|O60610|DIAP1_HUMAN@796			sp|P51970|NDUA8_HUMAN@36			sp|P50454|SERPH_HUMAN@156
sp|O15550|KDM6A_HUMAN@402			sp|O15294|OGT1_HUMAN@620			sp|O14976|GAK_HUMAN@472
sp|Q9Y4B6|DCAF1_HUMAN@106			sp|Q9UGL1|KDM5B_HUMAN@193			sp|P53621|COPA_HUMAN@975
sp|Q13427|PPIG_HUMAN@63			sp|P49327|FAS_HUMAN@1141			sp|Q5SRE5|NU188_HUMAN@161
sp|O00116|ADAS_HUMAN@214			sp|O60716|CTND1_HUMAN@692			sp|Q14442|PIGH_HUMAN@11
sp|Q8ND30|LIPB2_HUMAN@446			sp|Q9UNE7|CHIP_HUMAN@199			sp|P35712|SOX6_HUMAN@87
sp|Q5T4S7|UBR4_HUMAN@104			sp|Q7Z624|CMKMT_HUMAN@281			sp|Q15392|DHC24_HUMAN@499
sp|P45974|UBP5_HUMAN@195			sp|Q14980|NUMA1_HUMAN@1729			sp|Q9Y4C1|KDM3A_HUMAN@225
sp|P55884|EIF3B_HUMAN@515			sp|Q5JSZ5|PRC2B_HUMAN@1245			sp|Q6PL18|ATAD2_HUMAN@1388
sp|Q8WUW1|BRK1_HUMAN@43			sp|Q02040|AK17A_HUMAN@522			sp|P52788|SPSY_HUMAN@337
sp|P46937|YAP1_HUMAN@343			sp|Q9Y2U8|MAN1_HUMAN@785			sp|Q9Y4X5|ARI1_HUMAN@269
sp|Q13310|PABP4_HUMAN@494			sp|P47756|CAPZB_HUMAN@206			sp|Q32MZ4|LRRF1_HUMAN@334
sp|Q6P1N9|TATD1_HUMAN@123			sp|Q15365|PCBP1_HUMAN@109			sp|Q63HQ0|AP1AR_HUMAN@188
sp|Q93074|MED12_HUMAN@1006			sp|Q9Y6X3|SCC4_HUMAN@367			sp|Q93008|USP9X_HUMAN@1451
sp|Q9H3S7|PTN23_HUMAN@425			sp|Q7Z7A4|PXK_HUMAN@196			sp|Q9P2E2|KIF17_HUMAN@32
sp|P53350|PLK1_HUMAN@212			sp|P19404|NDUV2_HUMAN@225			sp|Q9Y6D5|BIG2_HUMAN@36
sp|Q9Y6N7|ROBO1_HUMAN@1437			sp|Q9NVU0|RPC5_HUMAN@350			sp|P34897|GLYM_HUMAN@343
sp|O95782|AP2A1_HUMAN@283			sp|Q9BXW9|FACD2_HUMAN@729			sp|Q9P287|BCCIP_HUMAN@213
sp|P62195|PRS8_HUMAN@363			sp|Q86WB0|ZC3C1_HUMAN@112			sp|Q04727|TLE4_HUMAN@32
sp|P33993|MCM7_HUMAN@378			sp|P03243|E1B55_ADE05@141			sp|Q9Y4B6|DCAF1_HUMAN@1070
sp|Q16531|DDB1_HUMAN@128			sp|O75110|ATP9A_HUMAN@760			sp|O75179|ANR17_HUMAN@564
sp|P53350|PLK1_HUMAN@67			sp|Q5VTU8|AT5EL_HUMAN@19			sp|Q92576|PHF3_HUMAN@561
sp|Q9H3U1|UN45A_HUMAN@503			sp|Q14997|PSME4_HUMAN@798			sp|Q9NUB1|ACS2L_HUMAN@151
sp|P82675|RT05_HUMAN@377			sp|Q5T4S7|UBR4_HUMAN@1795			sp|Q3YEC7|RABL6_HUMAN@172
sp|O00541|PESC_HUMAN@361			sp|Q9Y6R4|M3K4_HUMAN@1322			sp|Q8NE71|ABCF1_HUMAN@741
sp|Q9NRL2|BAZ1A_HUMAN@970			sp|P13798|ACPH_HUMAN@30			sp|Q14149|MORC3_HUMAN@619
sp|Q9HA92|RSAD1_HUMAN@175			sp|Q9NZW5|PALS2_HUMAN@298			sp|Q6UX07|DHR13_HUMAN@128
sp|Q12830|BPTF_HUMAN@445			sp|Q9BX95|SGPP1_HUMAN@27			sp|P45954|ACDSB_HUMAN@261
sp|P52948|NUP98_HUMAN@1590			sp|Q8NI27|THOC2_HUMAN@1031			sp|Q96HS1|PGAM5_HUMAN@168
sp|P04080|CYTB_HUMAN@3			sp|O60825|F262_HUMAN@196			sp|P16729|MCP_HCMVA@552
sp|O75461|E2F6_HUMAN@26			sp|Q96G61|NUD11_HUMAN@3			sp|Q4LDG9|DNAL1_HUMAN@59
sp|O75152|ZC11A_HUMAN@431			sp|O43660|PLRG1_HUMAN@338			sp|Q9UGU0|TCF20_HUMAN@868
sp|P68366|TBA4A_HUMAN@347			sp|Q9ULH0|KDIS_HUMAN@1646			sp|P22830|HEMH_HUMAN@294
sp|A0AVT1|UBA6_HUMAN@347			sp|Q9Y6D5|BIG2_HUMAN@76			sp|O00148|DX39A_HUMAN@223
sp|Q9UBW7|ZMYM2_HUMAN@612			sp|Q5VVJ2|MYSM1_HUMAN@773			sp|P31939|PUR9_HUMAN@434
sp|P27708|PYR1_HUMAN@868			sp|Q8NBN3|TM87A_HUMAN@89			sp|Q9H9Y6|RPA2_HUMAN@1061
sp|O75347|TBCA_HUMAN@67			sp|Q9H6K4|OPA3_HUMAN@164			sp|O95292|VAPB_HUMAN@173
sp|O75351|VPS4B_HUMAN@240			sp|P08559|ODPA_HUMAN@222			sp|P54136|SYRC_HUMAN@502
sp|O14972|VP26C_HUMAN@243			sp|P04899|GNAI2_HUMAN@112			sp|O15381|NVL_HUMAN@484
sp|Q9NV06|DCA13_HUMAN@87			sp|P07947|YES_HUMAN@410			sp|P46777|RL5_HUMAN@62
sp|P49137|MAPK2_HUMAN@98			sp|Q96Q89|KI20B_HUMAN@480			sp|Q86VP1|TAXB1_HUMAN@350
sp|Q13509|TBB3_HUMAN@12			sp|P17812|PYRG1_HUMAN@299			sp|P54132|BLM_HUMAN@468
sp|Q06124|PTN11_HUMAN@259			sp|Q7Z5L9|I2BP2_HUMAN@65			sp|Q9H869|YYAP1_HUMAN@266
sp|Q9BT40|INP5K_HUMAN@173			sp|Q8NHM5|KDM2B_HUMAN@1278			sp|Q13263|TIF1B_HUMAN@628
sp|Q5T4S7|UBR4_HUMAN@3414			sp|O43318|M3K7_HUMAN@527			sp|P19367|HXK1_HUMAN@813
sp|O95067|CCNB2_HUMAN@314			sp|Q9Y5Z7|HCFC2_HUMAN@346			sp|Q9NZJ0|DTL_HUMAN@379
sp|Q15154|PCM1_HUMAN@876			sp|P49792|RBP2_HUMAN@815			sp|Q9P2N5|RBM27_HUMAN@776
sp|Q8TAQ2|SMRC2_HUMAN@486			sp|A5YKK6|CNOT1_HUMAN@624			sp|Q9UKX7|NUP50_HUMAN@333
sp|O00257|CBX4_HUMAN@185			sp|Q16851|UGPA_HUMAN@123			sp|Q8WUB8|PHF10_HUMAN@134
sp|Q86U86|PB1_HUMAN@50			sp|Q8WX92|NELFB_HUMAN@269			sp|Q14202|ZMYM3_HUMAN@557
sp|O75122|CLAP2_HUMAN@528			sp|Q9NU22|MDN1_HUMAN@4409			sp|Q9C0B7|TNG6_HUMAN@453
sp|Q9P0L0|VAPA_HUMAN@128			sp|Q9BWF3|RBM4_HUMAN@89			sp|Q01970|PLCB3_HUMAN@221
sp|Q96N67|DOCK7_HUMAN@457			sp|Q8N653|LZTR1_HUMAN@342			sp|Q86XL3|ANKL2_HUMAN@702
sp|P51970|NDUA8_HUMAN@36			sp|Q8N806|UBR7_HUMAN@35			sp|Q8N697|S15A4_HUMAN@269
sp|Q13435|SF3B2_HUMAN@661			sp|P42695|CNDD3_HUMAN@330			sp|Q96KR1|ZFR_HUMAN@812
sp|O15294|OGT1_HUMAN@620			sp|P61970|NTF2_HUMAN@114			sp|Q9GZT8|NIF3L_HUMAN@213
sp|Q9UGL1|KDM5B_HUMAN@193			sp|Q96KR6|F210B_HUMAN@77			sp|O60264|SMCA5_HUMAN@527
sp|P49327|FAS_HUMAN@1141			sp|O00233|PSMD9_HUMAN@59			sp|P38606|VATA_HUMAN@254
sp|O60716|CTND1_HUMAN@692			sp|O95394|AGM1_HUMAN@348			sp|Q8NEP9|ZN555_HUMAN@575
sp|Q00610|CLH1_HUMAN@436			sp|O43592|XPOT_HUMAN@877			sp|Q8NDA8|MROH1_HUMAN@186
sp|Q9NY12|GAR1_HUMAN@88			sp|Q9NYH9|UTP6_HUMAN@566			sp|Q8IVL6|P3H3_HUMAN@128
sp|Q9UNE7|CHIP_HUMAN@199			sp|P50443|S26A2_HUMAN@700			sp|O95801|TTC4_HUMAN@149
sp|Q7Z624|CMKMT_HUMAN@281			sp|Q9C0E8|LNP_HUMAN@149			sp|Q7Z3B4|NUP54_HUMAN@171
sp|Q14152|EIF3A_HUMAN@78			sp|Q9Y296|TPPC4_HUMAN@195			sp|Q6ZRQ5|MMS22_HUMAN@121
sp|Q5JSZ5|PRC2B_HUMAN@1245			sp|O76062|ERG24_HUMAN@406			sp|Q8TDY2|RBCC1_HUMAN@207
sp|Q02040|AK17A_HUMAN@522			sp|P51580|TPMT_HUMAN@165			sp|Q9Y324|FCF1_HUMAN@134
sp|Q9Y2U8|MAN1_HUMAN@785			sp|O95613|PCNT_HUMAN@2150			sp|O60885|BRD4_HUMAN@674
sp|Q9NVX0|HAUS2_HUMAN@43			sp|Q96KP1|EXOC2_HUMAN@789			sp|Q9NUJ7|PLCX1_HUMAN@75
sp|P47756|CAPZB_HUMAN@206			sp|P16615|AT2A2_HUMAN@669			sp|Q8WV99|ZFN2B_HUMAN@171
sp|Q15365|PCBP1_HUMAN@109			sp|Q9Y314|NOSIP_HUMAN@185			sp|Q9UL18|AGO1_HUMAN@270
sp|Q7Z7A4|PXK_HUMAN@196			sp|P46100|ATRX_HUMAN@2404			sp|Q6NXE6|ARMC6_HUMAN@297
sp|P19404|NDUV2_HUMAN@225			sp|P31689|DNJA1_HUMAN@302			sp|O15067|PUR4_HUMAN@108
sp|Q6UWU4|CF089_HUMAN@28			sp|P11177|ODPB_HUMAN@263			sp|P08238|HS90B_HUMAN@590
sp|Q9NVU0|RPC5_HUMAN@350			sp|Q9NRP0|OSTC_HUMAN@14			sp|O75369|FLNB_HUMAN@2115
sp|Q9BXW9|FACD2_HUMAN@729			sp|Q9UMZ2|SYNRG_HUMAN@208			sp|Q9BYP7|WNK3_HUMAN@735
sp|Q8WXH0|SYNE2_HUMAN@6161			sp|Q96JB5|CK5P3_HUMAN@136			sp|Q9HD26|GOPC_HUMAN@408
sp|P03243|E1B55_ADE05@141			sp|P49841|GSK3B_HUMAN@317			sp|Q99570|PI3R4_HUMAN@195
sp|P04899|GNAI2_HUMAN@140			sp|Q10567|AP1B1_HUMAN@921			sp|Q8IXW5|RPAP2_HUMAN@288
sp|Q5VTU8|AT5EL_HUMAN@19			sp|Q9H7S9|ZN703_HUMAN@96			sp|P98170|XIAP_HUMAN@12
sp|Q07352|TISB_HUMAN@34			sp|Q14203|DCTN1_HUMAN@888			sp|Q4G176|ACSF3_HUMAN@399
sp|Q9Y6R4|M3K4_HUMAN@1322			sp|Q9BZL6|KPCD2_HUMAN@74			sp|O43426|SYNJ1_HUMAN@1531
sp|P13798|ACPH_HUMAN@30			sp|Q96SK2|TM209_HUMAN@422			sp|Q9C0D5|TANC1_HUMAN@557
sp|A6NIZ1|RP1BL_HUMAN@141			sp|Q9H3K6|BOLA2_HUMAN@59			sp|Q96B26|EXOS8_HUMAN@125
sp|Q8N5C8|TAB3_HUMAN@564			sp|P22102|PUR2_HUMAN@506			sp|A2RRP1|NBAS_HUMAN@897
sp|Q9NZW5|PALS2_HUMAN@298			sp|P62191|PRS4_HUMAN@58			sp|Q9NVH0|EXD2_HUMAN@202
sp|Q9BX95|SGPP1_HUMAN@27			sp|Q7L8L6|FAKD5_HUMAN@525			sp|Q14152|EIF3A_HUMAN@160
sp|Q8NI27|THOC2_HUMAN@1031			sp|Q969K3|RNF34_HUMAN@137			sp|P09303|HELI_VZVD@340
sp|O60825|F262_HUMAN@196			sp|Q9H9E3|COG4_HUMAN@589			sp|Q7Z333|SETX_HUMAN@2646
sp|Q96G61|NUD11_HUMAN@3			sp|Q2KHR2|RFX7_HUMAN@63			sp|Q13315|ATM_HUMAN@1482
sp|O43660|PLRG1_HUMAN@338			sp|Q9GZT9|EGLN1_HUMAN@208			sp|Q9HC52|CBX8_HUMAN@142
sp|Q9Y6D5|BIG2_HUMAN@76			sp|O00299|CLIC1_HUMAN@59			sp|O15027|SC16A_HUMAN@1811
sp|Q86X76|NIT1_HUMAN@17			sp|P11142|HSP7C_HUMAN@603			sp|Q92878|RAD50_HUMAN@1296
sp|Q8NBN3|TM87A_HUMAN@89			sp|O95613|PCNT_HUMAN@2576			sp|Q15041|AR6P1_HUMAN@109
sp|Q9H6K4|OPA3_HUMAN@164			sp|Q9P2J5|SYLC_HUMAN@573			sp|Q14409|GLPK3_HUMAN@293
sp|P54886|P5CS_HUMAN@612			sp|Q96SW2|CRBN_HUMAN@188			sp|Q9UKU0|ACSL6_HUMAN@55
sp|O15131|IMA6_HUMAN@256			sp|P35221|CTNA1_HUMAN@116			sp|Q92574|TSC1_HUMAN@306
sp|P08559|ODPA_HUMAN@222			sp|O60563|CCNT1_HUMAN@111			sp|Q5TA50|CPTP_HUMAN@105
sp|Q8IY18|SMC5_HUMAN@213			sp|Q02218|ODO1_HUMAN@283			sp|Q6GYQ0|RGPA1_HUMAN@1153
sp|P04899|GNAI2_HUMAN@112			sp|O94761|RECQ4_HUMAN@194			sp|Q9NWQ8|PHAG1_HUMAN@355
sp|O15297|PPM1D_HUMAN@478			sp|Q9NXW9|ALKB4_HUMAN@126			sp|Q00587|BORG5_HUMAN@161
sp|P07947|YES_HUMAN@410			sp|Q9Y2Y0|AR2BP_HUMAN@149			sp|Q86XA9|HTR5A_HUMAN@1533
sp|P17812|PYRG1_HUMAN@299			sp|Q5TCZ1|SPD2A_HUMAN@749			sp|Q92698|RAD54_HUMAN@64
sp|Q7Z5L9|I2BP2_HUMAN@65			sp|Q9Y2K2|SIK3_HUMAN@333			sp|Q9BWU0|NADAP_HUMAN@676
sp|Q9Y5Z7|HCFC2_HUMAN@346			sp|Q8TB03|CX038_HUMAN@12			sp|Q9Y5J1|UTP18_HUMAN@241
sp|P49792|RBP2_HUMAN@815			sp|Q12788|TBL3_HUMAN@728			sp|P15924|DESP_HUMAN@798
sp|A5YKK6|CNOT1_HUMAN@624			sp|Q96QR8|PURB_HUMAN@17			sp|P51654|GPC3_HUMAN@65
sp|Q16851|UGPA_HUMAN@123			sp|Q9H900|ZWILC_HUMAN@7			sp|Q9C0C2|TB182_HUMAN@1114
sp|Q13464|ROCK1_HUMAN@1300			sp|Q9P270|SLAI2_HUMAN@165			sp|O14654|IRS4_HUMAN@545
sp|Q12802|AKP13_HUMAN@2101			sp|P46063|RECQ1_HUMAN@49			sp|O43708|MAAI_HUMAN@205
sp|Q9BWF3|RBM4_HUMAN@89			sp|Q15170|TCAL1_HUMAN@90			sp|P25054|APC_HUMAN@1387
sp|Q8N653|LZTR1_HUMAN@342			sp|Q9Y4A5|TRRAP_HUMAN@2513			sp|O75367|H2AY_HUMAN@273
sp|P42695|CNDD3_HUMAN@330			sp|Q9UIW2|PLXA1_HUMAN@1296			sp|Q7Z4W1|DCXR_HUMAN@138
sp|P61970|NTF2_HUMAN@114			sp|Q86Y56|DAAF5_HUMAN@138			sp|Q9H0A8|COMD4_HUMAN@107
sp|Q96KR6|F210B_HUMAN@77			sp|Q12947|FOXF2_HUMAN@157			sp|Q7Z6M4|MTEF4_HUMAN@76
sp|O00233|PSMD9_HUMAN@59			sp|Q9UN86|G3BP2_HUMAN@73			sp|Q9H9Q2|CSN7B_HUMAN@240
sp|O95394|AGM1_HUMAN@348			sp|P42694|HELZ_HUMAN@1055			sp|Q9UIG0|BAZ1B_HUMAN@941
sp|Q96II8|LRCH3_HUMAN@531			sp|P53675|CLH2_HUMAN@617			sp|Q5JPE7|NOMO2_HUMAN@788
sp|Q9NYH9|UTP6_HUMAN@566			sp|P51654|GPC3_HUMAN@349			sp|Q9UHB9|SRP68_HUMAN@525
sp|Q9C0E8|LNP_HUMAN@149			sp|P29144|TPP2_HUMAN@150			sp|Q9BQE3|TBA1C_HUMAN@25
sp|Q9Y296|TPPC4_HUMAN@195			sp|Q9H2Y7|ZN106_HUMAN@643			sp|P49790|NU153_HUMAN@874
sp|O76062|ERG24_HUMAN@406			sp|Q9NVI1|FANCI_HUMAN@1184			REV_sp|Q9H1B5|XYLT2_HUMAN@704
sp|Q8NG31|KNL1_HUMAN@849			sp|Q8NBS9|TXND5_HUMAN@254			sp|P51617|IRAK1_HUMAN@225
sp|O95613|PCNT_HUMAN@2150			sp|P37198|NUP62_HUMAN@475			sp|Q6ZRS2|SRCAP_HUMAN@867
sp|P51580|TPMT_HUMAN@165			sp|Q96L50|LLR1_HUMAN@266			sp|P05549|AP2A_HUMAN@212
sp|Q96KP1|EXOC2_HUMAN@789			sp|Q9Y606|PUS1_HUMAN@260			sp|Q6NUQ4|TM214_HUMAN@529
sp|Q9NWU5|RM22_HUMAN@70			sp|Q8N1F7|NUP93_HUMAN@422			sp|P27708|PYR1_HUMAN@2092
sp|P16615|AT2A2_HUMAN@669			sp|P07814|SYEP_HUMAN@350			sp|Q8TAQ2|SMRC2_HUMAN@145
sp|P46100|ATRX_HUMAN@2404			sp|Q05823|RN5A_HUMAN@639			sp|Q9NV66|TYW1_HUMAN@504
sp|Q9Y314|NOSIP_HUMAN@185			sp|P27708|PYR1_HUMAN@897			sp|Q15276|RABE1_HUMAN@350
sp|P31689|DNJA1_HUMAN@302			sp|Q674X7|KAZRN_HUMAN@312			sp|Q8NF91|SYNE1_HUMAN@6962
sp|Q9UPT6|JIP3_HUMAN@992			sp|Q6PD62|CTR9_HUMAN@533			sp|Q9H583|HEAT1_HUMAN@1143
sp|P11177|ODPB_HUMAN@263			sp|Q99832|TCPH_HUMAN@364			sp|Q14129|DGCR6_HUMAN@191
sp|Q9NRP0|OSTC_HUMAN@14			sp|Q76FK4|NOL8_HUMAN@556			sp|Q08257|QOR_HUMAN@45
sp|Q8NCM8|DYHC2_HUMAN@1104			sp|Q5VZ89|DEN4C_HUMAN@1086			sp|Q8N4U5|T11L2_HUMAN@451
sp|Q96JB5|CK5P3_HUMAN@136			sp|Q13330|MTA1_HUMAN@281			sp|Q9H079|KTBL1_HUMAN@83
sp|P49841|GSK3B_HUMAN@317			sp|O94906|PRP6_HUMAN@913			sp|Q5T3I0|GPTC4_HUMAN@152
sp|Q10567|AP1B1_HUMAN@921			sp|P61927|RL37_HUMAN@37			sp|Q86Y07|VRK2_HUMAN@373
sp|Q9H7S9|ZN703_HUMAN@96			sp|P26196|DDX6_HUMAN@102			sp|Q9UQR1|ZN148_HUMAN@14
sp|Q5K4L6|S27A3_HUMAN@65			sp|Q14149|MORC3_HUMAN@694			sp|Q9H4K7|MTG2_HUMAN@206
sp|P51587|BRCA2_HUMAN@916			sp|Q9BVQ7|AFG2B_HUMAN@509			sp|Q5JTH9|RRP12_HUMAN@102
sp|Q14203|DCTN1_HUMAN@888			sp|Q9HBH1|DEFM_HUMAN@68			sp|O94966|UBP19_HUMAN@1288
sp|Q8IZP0|ABI1_HUMAN@33			sp|Q9ULF5|S39AA_HUMAN@598			sp|P22415|USF1_HUMAN@229
sp|Q9BZL6|KPCD2_HUMAN@74			sp|Q86W42|THOC6_HUMAN@314			sp|Q8IZT6|ASPM_HUMAN@441
sp|Q96SK2|TM209_HUMAN@422			sp|P52209|6PGD_HUMAN@289			sp|P29323|EPHB2_HUMAN@375
sp|P62191|PRS4_HUMAN@58			sp|P62753|RS6_HUMAN@12			sp|P63261|ACTG_HUMAN@272
sp|P22102|PUR2_HUMAN@506			sp|P25205|MCM3_HUMAN@263			sp|Q2T9J0|TYSD1_HUMAN@110
sp|Q9H3K6|BOLA2_HUMAN@59			sp|P0CG38|POTEI_HUMAN@717			sp|Q9BRN9|TM2D3_HUMAN@108
sp|Q7L8L6|FAKD5_HUMAN@525			sp|O95639|CPSF4_HUMAN@41			sp|P51148|RAB5C_HUMAN@64
sp|Q9H9E3|COG4_HUMAN@589			sp|Q9Y3T6|R3HC1_HUMAN@94			sp|Q9H816|DCR1B_HUMAN@149
sp|Q2KHR2|RFX7_HUMAN@63			sp|P48735|IDHP_HUMAN@418			sp|Q09161|NCBP1_HUMAN@728
sp|P51606|RENBP_HUMAN@249			sp|Q96HP0|DOCK6_HUMAN@1853			REV_sp|O95405|ZFYV9_HUMAN@765
sp|O00299|CLIC1_HUMAN@59			sp|P27708|PYR1_HUMAN@1296			sp|Q9NQG7|HPS4_HUMAN@63
sp|P11142|HSP7C_HUMAN@603			sp|P78312|F193A_HUMAN@1237			sp|Q9Y2F5|ICE1_HUMAN@1783
sp|O95613|PCNT_HUMAN@2576			sp|Q9NVM4|ANM7_HUMAN@262			sp|Q9Y3D5|RT18C_HUMAN@100
sp|Q70E73|RAPH1_HUMAN@847			sp|Q96GX5|GWL_HUMAN@455			sp|O95757|HS74L_HUMAN@270
sp|Q9P2J5|SYLC_HUMAN@573			sp|Q9H4B0|OSGL1_HUMAN@216			sp|O75928|PIAS2_HUMAN@490
sp|Q96SW2|CRBN_HUMAN@188			sp|Q9NRL2|BAZ1A_HUMAN@547			REV_sp|Q07864|DPOE1_HUMAN@413
sp|P35221|CTNA1_HUMAN@116			sp|Q9UGI8|TES_HUMAN@46			sp|Q76N32|CEP68_HUMAN@465
sp|O60563|CCNT1_HUMAN@111			sp|Q96P70|IPO9_HUMAN@864			sp|Q9UBK7|RBL2A_HUMAN@128
sp|Q5T5U3|RHG21_HUMAN@1700			sp|Q8IXW5|RPAP2_HUMAN@277			sp|Q96GS4|BORC6_HUMAN@242
sp|Q96HN2|SAHH3_HUMAN@398			sp|Q92620|PRP16_HUMAN@27			sp|Q8TAV0|FA76A_HUMAN@58
sp|Q02218|ODO1_HUMAN@283			sp|Q13242|SRSF9_HUMAN@80			sp|Q643R3|LPCT4_HUMAN@206
sp|O94761|RECQ4_HUMAN@194			sp|Q96HP0|DOCK6_HUMAN@444			sp|Q7Z2K8|GRIN1_HUMAN@778
sp|Q9NXW9|ALKB4_HUMAN@126			sp|Q14671|PUM1_HUMAN@1007			sp|O00429|DNM1L_HUMAN@300
sp|Q9Y2Y0|AR2BP_HUMAN@149			sp|Q14008|CKAP5_HUMAN@604			sp|Q9Y5X3|SNX5_HUMAN@347
sp|Q5TCZ1|SPD2A_HUMAN@749			sp|Q7Z3K3|POGZ_HUMAN@1219			sp|O00571|DDX3X_HUMAN@341
sp|Q5THK1|PR14L_HUMAN@541			sp|Q15477|SKI2_HUMAN@1207			sp|O95835|LATS1_HUMAN@850
sp|Q8TB03|CX038_HUMAN@12			sp|Q96JM3|CHAP1_HUMAN@592			sp|O00429|DNM1L_HUMAN@431
sp|Q96QR8|PURB_HUMAN@17			sp|Q13838|DX39B_HUMAN@198			sp|Q93008|USP9X_HUMAN@193
sp|Q9H900|ZWILC_HUMAN@7			sp|O75521|ECI2_HUMAN@77			sp|Q9BV44|THUM3_HUMAN@239
sp|Q9P270|SLAI2_HUMAN@165			sp|Q14694|UBP10_HUMAN@94			sp|P12235|ADT1_HUMAN@160
sp|P46063|RECQ1_HUMAN@49			sp|Q66K14|TBC9B_HUMAN@444			sp|P15336|ATF2_HUMAN@418
sp|Q15170|TCAL1_HUMAN@90			sp|Q9UJF2|NGAP_HUMAN@460			sp|Q9UBU7|DBF4A_HUMAN@135
sp|Q9Y4A5|TRRAP_HUMAN@2513			sp|Q9NYP9|MS18A_HUMAN@231			sp|Q66PJ3|AR6P4_HUMAN@226
sp|Q86Y56|DAAF5_HUMAN@138			sp|O60551|NMT2_HUMAN@104			sp|Q8IZD9|DOCK3_HUMAN@1640
sp|Q9C0C9|UBE2O_HUMAN@913			sp|P03255|E1A_ADE05@284			sp|P61225|RAP2B_HUMAN@140
sp|P78332|RBM6_HUMAN@277			sp|Q5T3U5|MRP7_HUMAN@1404			sp|Q96EP5|DAZP1_HUMAN@124
sp|Q12947|FOXF2_HUMAN@157			sp|P00966|ASSY_HUMAN@132			sp|P30038|AL4A1_HUMAN@315
sp|Q9UN86|G3BP2_HUMAN@73			sp|O95104|SCAF4_HUMAN@616			sp|Q9NX08|COMD8_HUMAN@32
sp|P42694|HELZ_HUMAN@1055			sp|P34949|MPI_HUMAN@11			sp|P78527|PRKDC_HUMAN@795
sp|P53675|CLH2_HUMAN@617			sp|P78345|RPP38_HUMAN@80			sp|Q8N201|INT1_HUMAN@1440
sp|P51654|GPC3_HUMAN@349			sp|Q9UGJ1|GCP4_HUMAN@151			sp|Q15813|TBCE_HUMAN@301
sp|Q9NVI1|FANCI_HUMAN@1184			sp|Q5T7W7|TSTD2_HUMAN@16			sp|Q8N9B5|JMY_HUMAN@721
sp|P37198|NUP62_HUMAN@475			sp|Q01804|OTUD4_HUMAN@489			sp|P26641|EF1G_HUMAN@194
sp|Q96L50|LLR1_HUMAN@266			sp|O75909|CCNK_HUMAN@23			sp|Q8IWS0|PHF6_HUMAN@305
sp|Q9Y606|PUS1_HUMAN@260			sp|Q9Y6E0|STK24_HUMAN@394			sp|Q9NXJ5|PGPI_HUMAN@206
sp|Q8N1F7|NUP93_HUMAN@422			sp|P27708|PYR1_HUMAN@736			sp|Q6XQN6|PNCB_HUMAN@385
sp|Q13011|ECH1_HUMAN@187			sp|Q86U86|PB1_HUMAN@1233			sp|Q969Z0|FAKD4_HUMAN@246
sp|Q9H553|ALG2_HUMAN@59			sp|O75691|UTP20_HUMAN@75			sp|Q8IZP2|ST134_HUMAN@205
sp|P07814|SYEP_HUMAN@350			sp|Q6PGN9|PSRC1_HUMAN@178			sp|Q9Y3T9|NOC2L_HUMAN@585
sp|Q05823|RN5A_HUMAN@639			sp|O75190|DNJB6_HUMAN@275			sp|Q6IQ49|SDE2_HUMAN@406
sp|P27708|PYR1_HUMAN@897			sp|Q9Y512|SAM50_HUMAN@457			sp|O00303|EIF3F_HUMAN@256
sp|Q16774|KGUA_HUMAN@98			sp|Q08752|PPID_HUMAN@282			sp|Q9Y6K9|NEMO_HUMAN@76
sp|Q6PD62|CTR9_HUMAN@533			sp|Q16513|PKN2_HUMAN@394			sp|Q15643|TRIPB_HUMAN@726
sp|Q99832|TCPH_HUMAN@364			sp|Q9BVA0|KTNB1_HUMAN@579			sp|Q9HCJ0|TNR6C_HUMAN@1883
sp|Q96HE9|PRR11_HUMAN@161			sp|Q15276|RABE1_HUMAN@718			sp|P56537|IF6_HUMAN@110
sp|Q76FK4|NOL8_HUMAN@556			sp|P17029|ZKSC1_HUMAN@63			sp|Q4J6C6|PPCEL_HUMAN@624
sp|Q5VZ89|DEN4C_HUMAN@1086			sp|Q9UBB9|TFP11_HUMAN@383			sp|Q6IA69|NADE_HUMAN@686
sp|Q13330|MTA1_HUMAN@281			sp|O60318|GANP_HUMAN@439			sp|Q14573|ITPR3_HUMAN@2668
sp|O94906|PRP6_HUMAN@913			sp|Q5T4D3|TMTC4_HUMAN@478			sp|Q13347|EIF3I_HUMAN@76
sp|P61927|RL37_HUMAN@37			sp|P17655|CAN2_HUMAN@240			sp|P29597|TYK2_HUMAN@278
sp|P26196|DDX6_HUMAN@102			sp|Q96T23|RSF1_HUMAN@650			sp|O60333|KIF1B_HUMAN@600
sp|O60907|TBL1X_HUMAN@571			sp|Q9NWT1|PK1IP_HUMAN@288			sp|Q7L3B6|CD37L_HUMAN@124
sp|Q14149|MORC3_HUMAN@694			sp|O94905|ERLN2_HUMAN@262			sp|O75792|RNH2A_HUMAN@181
sp|Q9BVQ7|AFG2B_HUMAN@509			sp|Q8WWI1|LMO7_HUMAN@261			sp|Q92576|PHF3_HUMAN@276
sp|Q9ULF5|S39AA_HUMAN@598			sp|O94973|AP2A2_HUMAN@532			sp|P04637|P53_HUMAN@135
sp|Q86W42|THOC6_HUMAN@314			sp|Q9H6Y2|WDR55_HUMAN@306			sp|Q5JXC2|MIIP_HUMAN@260
sp|P52209|6PGD_HUMAN@289			sp|P49810|PSN2_HUMAN@65			sp|Q7L576|CYFP1_HUMAN@1241
sp|P62753|RS6_HUMAN@12			sp|P78527|PRKDC_HUMAN@3347			sp|Q15437|SC23B_HUMAN@767
sp|P25205|MCM3_HUMAN@263			sp|O15027|SC16A_HUMAN@46			sp|Q86XT2|VP37D_HUMAN@231
sp|P0CG38|POTEI_HUMAN@717			sp|P31930|QCR1_HUMAN@154			sp|P04035|HMDH_HUMAN@883
sp|O95639|CPSF4_HUMAN@41			sp|Q15386|UBE3C_HUMAN@1051			sp|Q92667|AKAP1_HUMAN@389
sp|Q9Y3T6|R3HC1_HUMAN@94			sp|Q3SY69|AL1L2_HUMAN@389			sp|O43439|MTG8R_HUMAN@261
sp|P48735|IDHP_HUMAN@418			sp|O95214|LERL1_HUMAN@66			sp|O75131|CPNE3_HUMAN@5
sp|Q96HP0|DOCK6_HUMAN@1853			sp|P42356|PI4KA_HUMAN@19			sp|Q9UKX7|NUP50_HUMAN@181
sp|P17812|PYRG1_HUMAN@30			sp|O43795|MYO1B_HUMAN@103			sp|Q9NPG3|UBN1_HUMAN@837
sp|A6H8Y1|BDP1_HUMAN@1516			sp|Q6DT37|MRCKG_HUMAN@115			sp|Q12788|TBL3_HUMAN@129
sp|P27708|PYR1_HUMAN@1296			sp|P51812|KS6A3_HUMAN@579			sp|O15287|FANCG_HUMAN@130
sp|P78312|F193A_HUMAN@1237			sp|Q49A88|CCD14_HUMAN@313			sp|O94762|RECQ5_HUMAN@832
sp|Q9NVM4|ANM7_HUMAN@262			sp|Q6PGP7|SKI3_HUMAN@329			sp|Q9H2Y7|ZN106_HUMAN@510
sp|O14757|CHK1_HUMAN@48			sp|P62195|PRS8_HUMAN@112			sp|Q8N9T8|KRI1_HUMAN@531
sp|Q96GX5|GWL_HUMAN@455			sp|Q96HA1|P121A_HUMAN@307			sp|Q6X4U4|SOSD1_HUMAN@75
sp|Q96QU8|XPO6_HUMAN@315			sp|Q92538|GBF1_HUMAN@1431			sp|Q13085|ACACA_HUMAN@407
sp|Q9H4B0|OSGL1_HUMAN@216			sp|P21953|ODBB_HUMAN@299			sp|Q3L8U1|CHD9_HUMAN@1257
sp|Q9NRL2|BAZ1A_HUMAN@547			sp|O75486|SUPT3_HUMAN@186			sp|O75448|MED24_HUMAN@110
sp|P41240|CSK_HUMAN@290			sp|Q96KG9|SCYL1_HUMAN@309			sp|Q5T160|SYRM_HUMAN@311
sp|Q96P70|IPO9_HUMAN@864			sp|Q8WV74|NUDT8_HUMAN@5			sp|O14929|HAT1_HUMAN@120
sp|Q8IXW5|RPAP2_HUMAN@277			sp|P10114|RAP2A_HUMAN@140			sp|Q9BY44|EIF2A_HUMAN@119
sp|Q13242|SRSF9_HUMAN@80			sp|Q14690|RRP5_HUMAN@151			sp|P42704|LPPRC_HUMAN@208
sp|Q96HP0|DOCK6_HUMAN@444			sp|Q8N3C0|ASCC3_HUMAN@1535			sp|O15037|KHNYN_HUMAN@245
sp|Q14671|PUM1_HUMAN@1007			sp|Q07954|LRP1_HUMAN@3754			sp|O14617|AP3D1_HUMAN@39
sp|Q14008|CKAP5_HUMAN@604			sp|Q8NCD3|HJURP_HUMAN@646			sp|P52815|RM12_HUMAN@45
sp|Q7Z3K3|POGZ_HUMAN@1219			sp|Q9ULJ7|ANR50_HUMAN@36			sp|Q13769|THOC5_HUMAN@92
sp|Q96JM3|CHAP1_HUMAN@592			sp|P60891|PRPS1_HUMAN@41			sp|O43815|STRN_HUMAN@665
sp|Q13838|DX39B_HUMAN@198			sp|Q5W0B1|OBI1_HUMAN@432			sp|Q8NFW8|NEUA_HUMAN@432
sp|O75521|ECI2_HUMAN@77			sp|Q96LJ7|DHRS1_HUMAN@256			sp|Q99797|MIPEP_HUMAN@281
sp|Q66K14|TBC9B_HUMAN@444			sp|Q9NZT2|OGFR_HUMAN@443			sp|P25786|PSA1_HUMAN@182
sp|O43795|MYO1B_HUMAN@310			sp|P30837|AL1B1_HUMAN@386			sp|Q6ZVH7|ESPNL_HUMAN@629
sp|Q14694|UBP10_HUMAN@94			sp|Q8IXW5|RPAP2_HUMAN@358			sp|Q8IV32|CCD71_HUMAN@76
sp|Q9NYP9|MS18A_HUMAN@231			sp|Q8NHP6|MSPD2_HUMAN@471			sp|O15321|TM9S1_HUMAN@445
sp|Q9UJF2|NGAP_HUMAN@460			sp|O00410|IPO5_HUMAN@733			sp|P51151|RAB9A_HUMAN@142
sp|Q8N0U8|VKORL_HUMAN@50			sp|Q13404|UB2V1_HUMAN@144			sp|Q14C86|GAPD1_HUMAN@1160
sp|Q12802|AKP13_HUMAN@2163			sp|O95373|IPO7_HUMAN@736			sp|P55347|PKNX1_HUMAN@326
sp|O60551|NMT2_HUMAN@104			sp|Q969H6|POP5_HUMAN@11			sp|Q07955|SRSF1_HUMAN@148
sp|Q9Y6D6|BIG1_HUMAN@1685			sp|Q96AY4|TTC28_HUMAN@502			sp|O14981|BTAF1_HUMAN@908
sp|P34949|MPI_HUMAN@11			sp|P50990|TCPQ_HUMAN@187			sp|Q13459|MYO9B_HUMAN@2028
sp|P78345|RPP38_HUMAN@80			sp|P02768|ALBU_HUMAN@289			sp|Q9Y3F4|STRAP_HUMAN@340
sp|Q9UGJ1|GCP4_HUMAN@151			sp|Q14181|DPOA2_HUMAN@392			sp|Q9Y6D9|MD1L1_HUMAN@134
sp|Q01804|OTUD4_HUMAN@489			sp|P48200|IREB2_HUMAN@174			sp|Q14008|CKAP5_HUMAN@427
sp|O75909|CCNK_HUMAN@23			sp|Q9NQH7|XPP3_HUMAN@492			sp|Q8NE01|CNNM3_HUMAN@376
sp|Q9Y6E0|STK24_HUMAN@394			sp|P00558|PGK1_HUMAN@108			sp|Q8IWT3|CUL9_HUMAN@1340
sp|P78356|PI42B_HUMAN@30			sp|P40926|MDHM_HUMAN@212			sp|Q9BXY0|MAK16_HUMAN@29
sp|P27708|PYR1_HUMAN@736			sp|O95747|OXSR1_HUMAN@191			sp|Q7Z6Z7|HUWE1_HUMAN@3259
sp|O75691|UTP20_HUMAN@75			sp|Q9BQ67|GRWD1_HUMAN@66			sp|P14324|FPPS_HUMAN@183
sp|O75190|DNJB6_HUMAN@275			sp|P35579|MYH9_HUMAN@931			sp|P37287|PIGA_HUMAN@28
sp|Q6PGN9|PSRC1_HUMAN@178			sp|Q6P2Q9|PRP8_HUMAN@1896			sp|Q8NI35|INADL_HUMAN@744
sp|P28066|PSA5_HUMAN@165			sp|Q9H0E9|BRD8_HUMAN@64			sp|Q8TCN5|ZN507_HUMAN@86
sp|Q9Y512|SAM50_HUMAN@457			sp|Q2M296|MTHSD_HUMAN@267			sp|Q13616|CUL1_HUMAN@291
sp|Q16513|PKN2_HUMAN@394			sp|Q93008|USP9X_HUMAN@2239			sp|Q9NU22|MDN1_HUMAN@4259
sp|Q9BVA0|KTNB1_HUMAN@579			sp|Q92771|DDX12_HUMAN@655			sp|Q5H9F3|BCORL_HUMAN@1101
sp|A0A3B3IRV3|MCTS2_HUMAN@113			sp|P00558|PGK1_HUMAN@316			sp|P78417|GSTO1_HUMAN@192
sp|Q15276|RABE1_HUMAN@718			sp|P27708|PYR1_HUMAN@1085			sp|Q8N0S6|CENPL_HUMAN@52
sp|P17029|ZKSC1_HUMAN@63			sp|Q00613|HSF1_HUMAN@103			sp|Q96JG6|VPS50_HUMAN@430
sp|O60318|GANP_HUMAN@439			sp|P19367|HXK1_HUMAN@886			sp|Q9UG63|ABCF2_HUMAN@161
sp|Q5T4D3|TMTC4_HUMAN@478			sp|O14617|AP3D1_HUMAN@348			sp|P35658|NU214_HUMAN@231
sp|Q96T23|RSF1_HUMAN@650			sp|O95817|BAG3_HUMAN@373			sp|Q6P597|KLC3_HUMAN@314
sp|Q9NWT1|PK1IP_HUMAN@288			sp|Q92990|GLMN_HUMAN@218			sp|Q9BYE7|PCGF6_HUMAN@172
sp|O95373|IPO7_HUMAN@757			sp|Q5T8P6|RBM26_HUMAN@25			sp|P50851|LRBA_HUMAN@2820
sp|O94905|ERLN2_HUMAN@262			sp|Q14008|CKAP5_HUMAN@1500			sp|Q9Y5Q9|TF3C3_HUMAN@637
sp|Q8WWI1|LMO7_HUMAN@261			sp|P63208|SKP1_HUMAN@120			sp|Q53GG5|PDLI3_HUMAN@77
sp|P38398|BRCA1_HUMAN@805			sp|Q9H1P3|OSBL2_HUMAN@122			sp|Q96BD8|SKA1_HUMAN@142
sp|Q5T4S7|UBR4_HUMAN@3392			sp|Q9UKJ3|GPTC8_HUMAN@639			sp|Q6FI81|CPIN1_HUMAN@277
sp|O14646|CHD1_HUMAN@502			sp|P26367|PAX6_HUMAN@40			sp|O75691|UTP20_HUMAN@313
sp|Q9H6Y2|WDR55_HUMAN@306			sp|O75439|MPPB_HUMAN@62			sp|O60610|DIAP1_HUMAN@796
sp|P49810|PSN2_HUMAN@65			REV_sp|O14513|NCKP5_HUMAN@1697			sp|O15550|KDM6A_HUMAN@402
sp|Q6PKC3|TXD11_HUMAN@815			sp|Q96JX3|SRAC1_HUMAN@627			sp|Q9Y4B6|DCAF1_HUMAN@106
sp|P78527|PRKDC_HUMAN@3347			sp|P54198|HIRA_HUMAN@518			sp|Q8N0U8|VKORL_HUMAN@58
sp|O15027|SC16A_HUMAN@46			sp|Q9UJV9|DDX41_HUMAN@568			sp|Q13427|PPIG_HUMAN@63
sp|P31930|QCR1_HUMAN@154			sp|O95602|RPA1_HUMAN@1332			sp|O00116|ADAS_HUMAN@214
sp|Q15386|UBE3C_HUMAN@1051			sp|P40926|MDHM_HUMAN@285			sp|Q8ND30|LIPB2_HUMAN@446
sp|Q3SY69|AL1L2_HUMAN@389			sp|P49753|ACOT2_HUMAN@183			sp|Q5T4S7|UBR4_HUMAN@104
sp|P42356|PI4KA_HUMAN@19			sp|Q08J23|NSUN2_HUMAN@599			sp|P61513|RL37A_HUMAN@42
sp|O43795|MYO1B_HUMAN@103			sp|Q13045|FLII_HUMAN@576			sp|O00442|RTCA_HUMAN@28
sp|Q6DT37|MRCKG_HUMAN@115			sp|Q96N21|AP4AT_HUMAN@302			sp|P45974|UBP5_HUMAN@195
sp|Q13363|CTBP1_HUMAN@54			sp|P51608|MECP2_HUMAN@413			sp|O75161|NPHP4_HUMAN@832
sp|P51812|KS6A3_HUMAN@579			sp|P62333|PRS10_HUMAN@228			sp|P55884|EIF3B_HUMAN@515
sp|Q6PGP7|SKI3_HUMAN@329			sp|Q5IS35|TPC_MACFA@268			sp|Q8WUW1|BRK1_HUMAN@43
sp|P62195|PRS8_HUMAN@112			sp|Q92598|HS105_HUMAN@516			sp|Q13332|PTPRS_HUMAN@1704
sp|Q96HA1|P121A_HUMAN@307			sp|P53618|COPB_HUMAN@390			sp|Q13310|PABP4_HUMAN@494
sp|Q92538|GBF1_HUMAN@1431			sp|Q9H967|WDR76_HUMAN@342			sp|Q9ULM3|YETS2_HUMAN@565
sp|P21953|ODBB_HUMAN@299			sp|Q6W2J9|BCOR_HUMAN@1436			sp|Q8NHU6|TDRD7_HUMAN@692
sp|O75486|SUPT3_HUMAN@186			sp|Q9UEY8|ADDG_HUMAN@73			sp|Q96H55|MYO19_HUMAN@515
sp|P52789|HXK2_HUMAN@823			sp|Q14204|DYHC1_HUMAN@2076			sp|Q8TEA1|NSUN6_HUMAN@242
sp|Q96KG9|SCYL1_HUMAN@309			sp|O14981|BTAF1_HUMAN@371			sp|Q96SQ9|CP2S1_HUMAN@155
sp|Q8WV74|NUDT8_HUMAN@5			sp|P36776|LONM_HUMAN@909			sp|Q93074|MED12_HUMAN@1006
sp|P10114|RAP2A_HUMAN@140			sp|Q92833|JARD2_HUMAN@206			sp|P46937|YAP1_HUMAN@343
sp|Q14690|RRP5_HUMAN@151			sp|P46459|NSF_HUMAN@250			sp|Q8N5B7|CERS5_HUMAN@142
sp|Q8N3C0|ASCC3_HUMAN@1535			sp|Q9UHC7|MKRN1_HUMAN@186			sp|Q9H3S7|PTN23_HUMAN@425
sp|Q8NCD3|HJURP_HUMAN@646			sp|P51114|FXR1_HUMAN@77			sp|O75665|OFD1_HUMAN@581
sp|P60891|PRPS1_HUMAN@41			sp|Q8TEA7|TBCK_HUMAN@386			sp|P53350|PLK1_HUMAN@212
sp|Q5W0B1|OBI1_HUMAN@432			sp|Q13111|CAF1A_HUMAN@207			sp|O75643|U520_HUMAN@1359
sp|Q9UHY1|NRBP_HUMAN@61			sp|Q8IZ83|A16A1_HUMAN@249			sp|Q9Y6N7|ROBO1_HUMAN@1437
sp|Q96LJ7|DHRS1_HUMAN@256			sp|Q9UQ35|SRRM2_HUMAN@1036			sp|O95782|AP2A1_HUMAN@283
sp|Q9NZT2|OGFR_HUMAN@443			sp|P21333|FLNA_HUMAN@2199			sp|P62195|PRS8_HUMAN@363
sp|P30837|AL1B1_HUMAN@386			sp|P19838|NFKB1_HUMAN@925			sp|P33993|MCM7_HUMAN@378
sp|Q8IXW5|RPAP2_HUMAN@358			sp|P30084|ECHM_HUMAN@225			sp|Q16531|DDB1_HUMAN@128
sp|Q8NHP6|MSPD2_HUMAN@471			sp|Q9H0A0|NAT10_HUMAN@255			sp|P53350|PLK1_HUMAN@67
sp|O00410|IPO5_HUMAN@733			sp|P17181|INAR1_HUMAN@426			sp|Q9H3U1|UN45A_HUMAN@503
sp|Q13404|UB2V1_HUMAN@144			sp|Q96E22|NGBR_HUMAN@208			sp|Q96DT7|ZBT10_HUMAN@248
sp|O95373|IPO7_HUMAN@736			sp|Q8TCB7|METL6_HUMAN@256			sp|Q9Y2I1|NISCH_HUMAN@185
sp|Q969H6|POP5_HUMAN@11			sp|Q96Q15|SMG1_HUMAN@2738			REV_sp|A3KFT3|OR2M5_HUMAN@111
sp|Q6ZN04|MEX3B_HUMAN@438			sp|O95104|SCAF4_HUMAN@54			sp|P82675|RT05_HUMAN@377
sp|Q96AY4|TTC28_HUMAN@502			sp|P78527|PRKDC_HUMAN@1312			sp|Q8TC12|RDH11_HUMAN@133
sp|P50990|TCPQ_HUMAN@187			sp|P31153|METK2_HUMAN@56			sp|Q9BRT6|LLPH_HUMAN@64
sp|Q14181|DPOA2_HUMAN@392			sp|Q32NB8|PGPS1_HUMAN@444			sp|Q86X10|RLGPB_HUMAN@992
sp|P48200|IREB2_HUMAN@174			sp|P13798|ACPH_HUMAN@312			sp|O00541|PESC_HUMAN@361
sp|P35520|CBS_HUMAN@52			sp|A6NHR9|SMHD1_HUMAN@1433			sp|Q9NRL2|BAZ1A_HUMAN@970
sp|P00558|PGK1_HUMAN@108			sp|Q9P2E9|RRBP1_HUMAN@1216			sp|Q9HA92|RSAD1_HUMAN@175
sp|Q9BQ67|GRWD1_HUMAN@66			sp|P61247|RS3A_HUMAN@111			sp|Q6NUQ4|TM214_HUMAN@377
sp|P40926|MDHM_HUMAN@212			sp|Q13395|TARB1_HUMAN@202			sp|Q9P2P1|NYNRI_HUMAN@447
sp|Q8NFC6|BD1L1_HUMAN@2438			sp|O14745|NHRF1_HUMAN@206			sp|Q12830|BPTF_HUMAN@445
sp|P35579|MYH9_HUMAN@931			sp|P17812|PYRG1_HUMAN@491			sp|P52948|NUP98_HUMAN@1590
sp|Q6P2Q9|PRP8_HUMAN@1896			sp|P61163|ACTZ_HUMAN@34			sp|Q8N1G0|ZN687_HUMAN@1003
sp|Q9H0E9|BRD8_HUMAN@64			sp|Q9Y4A5|TRRAP_HUMAN@3555			sp|P04080|CYTB_HUMAN@3
sp|Q2M296|MTHSD_HUMAN@267			sp|Q15398|DLGP5_HUMAN@129			sp|O75461|E2F6_HUMAN@26
sp|Q9ULJ7|ANR50_HUMAN@122			sp|P38606|VATA_HUMAN@394			sp|O75152|ZC11A_HUMAN@431
sp|Q93008|USP9X_HUMAN@2239			sp|Q68DK2|ZFY26_HUMAN@66			sp|Q6PL18|ATAD2_HUMAN@785
sp|P00558|PGK1_HUMAN@316			sp|P49759|CLK1_HUMAN@151			sp|O75882|ATRN_HUMAN@933
sp|P27708|PYR1_HUMAN@1085			sp|Q4J6C6|PPCEL_HUMAN@227			sp|P68366|TBA4A_HUMAN@347
sp|Q00613|HSF1_HUMAN@103			sp|P22234|PUR6_HUMAN@185			sp|A0AVT1|UBA6_HUMAN@347
sp|Q5HYJ3|FA76B_HUMAN@57			sp|Q92620|PRP16_HUMAN@582			sp|P27708|PYR1_HUMAN@868
sp|P19367|HXK1_HUMAN@886			sp|Q15021|CND1_HUMAN@1249			sp|Q9UBW7|ZMYM2_HUMAN@612
sp|O14617|AP3D1_HUMAN@348			sp|O15091|MRPP3_HUMAN@367			sp|O75347|TBCA_HUMAN@67
sp|O95817|BAG3_HUMAN@373			sp|Q53H96|P5CR3_HUMAN@266			sp|O75351|VPS4B_HUMAN@240
sp|Q92990|GLMN_HUMAN@218			sp|Q6AI12|ANR40_HUMAN@209			sp|O14972|VP26C_HUMAN@243
sp|Q5T8P6|RBM26_HUMAN@25			sp|Q6ZRI6|CO039_HUMAN@210			sp|Q7L576|CYFP1_HUMAN@519
sp|Q14008|CKAP5_HUMAN@1500			sp|Q9H1A7|RPB1C_HUMAN@30			sp|Q15032|R3HD1_HUMAN@858
sp|P63208|SKP1_HUMAN@120			sp|P21953|ODBB_HUMAN@382			sp|Q9NV06|DCA13_HUMAN@87
sp|Q5VUA4|ZN318_HUMAN@242			sp|Q14204|DYHC1_HUMAN@2712			sp|Q6ZVH7|ESPNL_HUMAN@958
sp|Q9UPU5|UBP24_HUMAN@2160			sp|Q96CW5|GCP3_HUMAN@388			sp|P49137|MAPK2_HUMAN@98
sp|Q9H1P3|OSBL2_HUMAN@122			sp|Q9P1Y5|CAMP3_HUMAN@1167			sp|Q13509|TBB3_HUMAN@12
sp|Q9UKJ3|GPTC8_HUMAN@639			sp|Q13423|NNTM_HUMAN@1073			sp|Q06124|PTN11_HUMAN@259
sp|O75439|MPPB_HUMAN@62			sp|Q9P2I0|CPSF2_HUMAN@294			sp|O43314|VIP2_HUMAN@842
sp|P54198|HIRA_HUMAN@518			sp|Q13315|ATM_HUMAN@2323			sp|Q9BQ52|RNZ2_HUMAN@753
sp|Q9Y5K6|CD2AP_HUMAN@595			sp|Q14442|PIGH_HUMAN@166			sp|Q9BT40|INP5K_HUMAN@173
sp|O15355|PPM1G_HUMAN@351			sp|Q96ME7|ZN512_HUMAN@430			sp|O95067|CCNB2_HUMAN@314
sp|P11717|MPRI_HUMAN@1282			sp|Q14674|ESPL1_HUMAN@294			sp|Q5T4S7|UBR4_HUMAN@3414
sp|B4E2M5|ANR66_HUMAN@125			sp|O14979|HNRDL_HUMAN@277			sp|Q15154|PCM1_HUMAN@876
sp|Q6P587|FAHD1_HUMAN@129			sp|Q9NVF7|FBX28_HUMAN@116			sp|Q5JSZ5|PRC2B_HUMAN@719
sp|Q8IWZ3|ANKH1_HUMAN@181			sp|P46459|NSF_HUMAN@599			sp|O14981|BTAF1_HUMAN@348
sp|Q9UJV9|DDX41_HUMAN@568			sp|Q9P0J1|PDP1_HUMAN@132			sp|Q8TAQ2|SMRC2_HUMAN@486
sp|O95602|RPA1_HUMAN@1332			sp|Q13126|MTAP_HUMAN@131			sp|O00257|CBX4_HUMAN@185
sp|P40926|MDHM_HUMAN@285			sp|Q14789|GOGB1_HUMAN@1811			sp|Q86U86|PB1_HUMAN@50
sp|P49753|ACOT2_HUMAN@183			sp|Q96RT8|GCP5_HUMAN@670			sp|O75122|CLAP2_HUMAN@528
sp|Q08J23|NSUN2_HUMAN@599			sp|Q14012|KCC1A_HUMAN@267			sp|Q7Z5U6|WDR53_HUMAN@63
sp|Q13045|FLII_HUMAN@576			sp|Q8NHU6|TDRD7_HUMAN@333			sp|Q5UIP0|RIF1_HUMAN@2274
sp|O00255|MEN1_HUMAN@421			sp|Q9UBH6|S53A1_HUMAN@188			sp|Q96N67|DOCK7_HUMAN@457
sp|P51608|MECP2_HUMAN@413			sp|Q96Q15|SMG1_HUMAN@1448			sp|O00178|GTPB1_HUMAN@360
sp|P62333|PRS10_HUMAN@228			sp|Q92558|WASF1_HUMAN@296			sp|Q9C0A6|SETD5_HUMAN@780
sp|Q92598|HS105_HUMAN@516			sp|P08240|SRPRA_HUMAN@363			sp|P51970|NDUA8_HUMAN@36
sp|P53618|COPB_HUMAN@390			sp|P78549|NTH_HUMAN@118			sp|Q96P48|ARAP1_HUMAN@1310
sp|Q14807|KIF22_HUMAN@508			sp|Q86SX3|TEDC1_HUMAN@190			sp|O15294|OGT1_HUMAN@620
sp|Q6W2J9|BCOR_HUMAN@1436			sp|O15226|NKRF_HUMAN@242			sp|Q6ZNW5|GDPP1_HUMAN@64
sp|Q14204|DYHC1_HUMAN@2076			sp|Q9ULC3|RAB23_HUMAN@130			sp|Q9UPS8|ANR26_HUMAN@735
sp|O14763|TR10B_HUMAN@248			sp|Q6VMQ6|MCAF1_HUMAN@451			sp|Q9UGL1|KDM5B_HUMAN@193
sp|O14981|BTAF1_HUMAN@371			sp|Q8TDN6|BRX1_HUMAN@52			sp|P49327|FAS_HUMAN@1141
sp|P36776|LONM_HUMAN@909			sp|Q9UKV3|ACINU_HUMAN@1083			sp|Q9NRF8|PYRG2_HUMAN@176
sp|P31942|HNRH3_HUMAN@27			sp|O15068|MCF2L_HUMAN@951			sp|O60716|CTND1_HUMAN@692
sp|P46459|NSF_HUMAN@250			sp|Q9UBD5|ORC3_HUMAN@159			sp|Q9NY12|GAR1_HUMAN@88
sp|Q9UHC7|MKRN1_HUMAN@186			sp|Q01813|PFKAP_HUMAN@664			sp|Q00610|CLH1_HUMAN@436
sp|P51114|FXR1_HUMAN@77			sp|O00471|EXOC5_HUMAN@71			sp|Q14671|PUM1_HUMAN@234
sp|Q8TEA7|TBCK_HUMAN@386			REV_sp|Q9NZR2|LRP1B_HUMAN@3582			sp|Q96BX8|MOB3A_HUMAN@186
sp|P13639|EF2_HUMAN@290			sp|Q6ZN17|LN28B_HUMAN@201			sp|Q9UNE7|CHIP_HUMAN@199
sp|Q7L2H7|EIF3M_HUMAN@125			sp|Q9P258|RCC2_HUMAN@305			sp|Q14152|EIF3A_HUMAN@78
sp|Q14653|IRF3_HUMAN@222			sp|B2RTY4|MYO9A_HUMAN@152			sp|Q7Z624|CMKMT_HUMAN@281
sp|Q8N6M0|OTU6B_HUMAN@172			sp|Q9H649|NSUN3_HUMAN@214			sp|Q14980|NUMA1_HUMAN@1729
sp|Q13111|CAF1A_HUMAN@207			sp|Q7Z5K2|WAPL_HUMAN@964			sp|Q5JSZ5|PRC2B_HUMAN@1245
sp|Q8IZ83|A16A1_HUMAN@249			sp|Q9H1I8|ASCC2_HUMAN@276			sp|Q02040|AK17A_HUMAN@522
sp|Q9UQ35|SRRM2_HUMAN@1036			sp|Q7Z3U7|MON2_HUMAN@1453			sp|Q9Y2U8|MAN1_HUMAN@785
sp|P21333|FLNA_HUMAN@2199			sp|Q7L5N1|CSN6_HUMAN@299			sp|Q9NVX0|HAUS2_HUMAN@43
sp|P19838|NFKB1_HUMAN@925			sp|Q14118|DAG1_HUMAN@713			sp|P47756|CAPZB_HUMAN@206
sp|Q9H0A0|NAT10_HUMAN@255			sp|O43823|AKAP8_HUMAN@173			sp|P49441|INPP_HUMAN@10
sp|Q96E22|NGBR_HUMAN@208			sp|Q14997|PSME4_HUMAN@710			sp|Q15365|PCBP1_HUMAN@109
sp|Q8TCB7|METL6_HUMAN@256			sp|Q16555|DPYL2_HUMAN@504			sp|Q8WXH0|SYNE2_HUMAN@3154
sp|Q96Q15|SMG1_HUMAN@2738			sp|Q8NHQ8|RASF8_HUMAN@159			sp|Q9Y6X3|SCC4_HUMAN@367
sp|O95104|SCAF4_HUMAN@54			sp|P40222|TXLNA_HUMAN@373			sp|Q92621|NU205_HUMAN@1297
sp|P78527|PRKDC_HUMAN@1312			sp|Q4V328|GRAP1_HUMAN@744			sp|Q7Z7A4|PXK_HUMAN@196
sp|P31153|METK2_HUMAN@56			sp|P06733|ENOA_HUMAN@399			sp|P49327|FAS_HUMAN@1448
sp|P35219|CAH8_HUMAN@200			sp|P49916|DNLI3_HUMAN@729			sp|Q9HCK1|ZDBF2_HUMAN@1703
sp|A6NHR9|SMHD1_HUMAN@1433			sp|O00458|IFRD1_HUMAN@178			sp|P19404|NDUV2_HUMAN@225
sp|Q8WXH0|SYNE2_HUMAN@5359			sp|P57721|PCBP3_HUMAN@86			sp|Q9NVU0|RPC5_HUMAN@350
sp|P61247|RS3A_HUMAN@111			sp|Q12824|SNF5_HUMAN@167			sp|Q499Z4|ZN672_HUMAN@350
sp|Q13395|TARB1_HUMAN@202			sp|O60941|DTNB_HUMAN@309			sp|Q9NZM4|BICRA_HUMAN@1083
sp|Q16204|CCDC6_HUMAN@27			sp|O00442|RTCA_HUMAN@153			sp|Q9BXW9|FACD2_HUMAN@729
sp|O14745|NHRF1_HUMAN@206			sp|Q14332|FZD2_HUMAN@306			sp|Q86WB0|ZC3C1_HUMAN@112
sp|P61163|ACTZ_HUMAN@34			sp|Q6P2Q9|PRP8_HUMAN@497			sp|O95197|RTN3_HUMAN@582
sp|Q9Y4A5|TRRAP_HUMAN@3555			sp|Q9Y6J9|TAF6L_HUMAN@230			sp|P21359|NF1_HUMAN@434
sp|P17812|PYRG1_HUMAN@491			sp|Q96CS4|ZN689_HUMAN@70			sp|Q8WXH0|SYNE2_HUMAN@6161
sp|Q15398|DLGP5_HUMAN@129			sp|Q8N335|GPD1L_HUMAN@104			sp|P03243|E1B55_ADE05@141
sp|P38606|VATA_HUMAN@394			sp|P06400|RB_HUMAN@666			sp|Q8TD19|NEK9_HUMAN@506
sp|P49759|CLK1_HUMAN@151			sp|P60174|TPIS_HUMAN@67			sp|O75110|ATP9A_HUMAN@760
sp|Q8IYQ7|THNS1_HUMAN@723			sp|Q9UPN7|PP6R1_HUMAN@37			sp|Q9UPR3|SMG5_HUMAN@39
sp|Q4J6C6|PPCEL_HUMAN@227			sp|P23528|COF1_HUMAN@139			sp|Q5VTU8|AT5EL_HUMAN@19
sp|Q15021|CND1_HUMAN@1249			sp|Q9Y224|RTRAF_HUMAN@69			sp|P15104|GLNA_HUMAN@346
sp|O15091|MRPP3_HUMAN@367			sp|P16615|AT2A2_HUMAN@560			sp|Q07352|TISB_HUMAN@34
sp|Q53H96|P5CR3_HUMAN@266			sp|Q86W56|PARG_HUMAN@57			sp|Q96HI0|SENP5_HUMAN@672
sp|Q6AI12|ANR40_HUMAN@209			sp|Q8IWV8|UBR2_HUMAN@1619			sp|Q5T4S7|UBR4_HUMAN@1795
sp|Q6ZRI6|CO039_HUMAN@210			sp|Q9NWZ8|GEMI8_HUMAN@180			sp|O15417|TNC18_HUMAN@475
sp|Q9H1A7|RPB1C_HUMAN@30			sp|P06400|RB_HUMAN@278			sp|Q9NQX3|GEPH_HUMAN@212
sp|Q13129|RLF_HUMAN@74			sp|Q92625|ANS1A_HUMAN@866			sp|Q9Y6R4|M3K4_HUMAN@1322
sp|Q9P1Y5|CAMP3_HUMAN@1167			sp|Q14669|TRIPC_HUMAN@1276			sp|P13798|ACPH_HUMAN@30
sp|Q14204|DYHC1_HUMAN@2712			sp|Q9ULK4|MED23_HUMAN@98			sp|A6NIZ1|RP1BL_HUMAN@141
sp|Q96CW5|GCP3_HUMAN@388			sp|O60306|AQR_HUMAN@28			sp|Q6AI08|HEAT6_HUMAN@1065
sp|Q13423|NNTM_HUMAN@1073			sp|Q96N66|MBOA7_HUMAN@280			sp|Q9NZW5|PALS2_HUMAN@298
sp|Q14789|GOGB1_HUMAN@2233			sp|P54760|EPHB4_HUMAN@630			sp|Q9BX95|SGPP1_HUMAN@27
sp|Q9P2I0|CPSF2_HUMAN@294			sp|P38117|ETFB_HUMAN@71			sp|Q8NI27|THOC2_HUMAN@1031
sp|Q14674|ESPL1_HUMAN@294			sp|Q9P2E9|RRBP1_HUMAN@933			sp|P05198|IF2A_HUMAN@199
sp|Q13315|ATM_HUMAN@2323			sp|Q9Y3C6|PPIL1_HUMAN@133			sp|Q9C0I1|MTMRC_HUMAN@152
sp|Q96ME7|ZN512_HUMAN@430			sp|Q9UJC3|HOOK1_HUMAN@432			sp|Q7Z3E5|ARMC9_HUMAN@706
sp|Q14442|PIGH_HUMAN@166			sp|Q9BVK2|ALG8_HUMAN@218			sp|Q9UBC1|IKBL1_HUMAN@213
sp|Q9NVF7|FBX28_HUMAN@116			sp|A0AVT1|UBA6_HUMAN@546			sp|Q5T4S7|UBR4_HUMAN@3765
sp|P46459|NSF_HUMAN@599			sp|P40938|RFC3_HUMAN@32			sp|Q8IZM8|ZN654_HUMAN@45
sp|Q9NZJ4|SACS_HUMAN@2424			sp|P50579|MAP2_HUMAN@121			sp|Q96G61|NUD11_HUMAN@3
sp|Q13126|MTAP_HUMAN@131			sp|Q03468|ERCC6_HUMAN@1464			sp|O43660|PLRG1_HUMAN@338
sp|Q14789|GOGB1_HUMAN@1811			sp|Q15648|MED1_HUMAN@489			sp|Q9ULH0|KDIS_HUMAN@1646
sp|Q96RT8|GCP5_HUMAN@670			sp|Q1KMD3|HNRL2_HUMAN@602			sp|Q9Y6D5|BIG2_HUMAN@76
sp|Q14012|KCC1A_HUMAN@267			sp|O14772|FPGT_HUMAN@414			sp|Q8NBN3|TM87A_HUMAN@89
sp|P55196|AFAD_HUMAN@841			sp|Q9H9A6|LRC40_HUMAN@438			sp|P54886|P5CS_HUMAN@612
sp|P49589|SYCC_HUMAN@506			sp|O15173|PGRC2_HUMAN@159			sp|Q9H6K4|OPA3_HUMAN@164
sp|Q8NHU6|TDRD7_HUMAN@333			sp|Q9P2B4|CT2NL_HUMAN@76			sp|Q9BQ90|KLDC3_HUMAN@33
sp|P55084|ECHB_HUMAN@28			sp|Q7Z7H8|RM10_HUMAN@180			sp|O15131|IMA6_HUMAN@256
sp|Q9UBH6|S53A1_HUMAN@188			sp|Q92574|TSC1_HUMAN@822			sp|P08559|ODPA_HUMAN@222
sp|Q96NT5|PCFT_HUMAN@21			sp|Q9NUU7|DD19A_HUMAN@313			sp|P19174|PLCG1_HUMAN@881
sp|Q96Q15|SMG1_HUMAN@1448			sp|Q96BN8|OTUL_HUMAN@17			sp|P04899|GNAI2_HUMAN@112
sp|P13196|HEM1_HUMAN@263			sp|P46734|MP2K3_HUMAN@207			sp|P34949|MPI_HUMAN@309
sp|Q92558|WASF1_HUMAN@296			sp|Q12841|FSTL1_HUMAN@221			sp|O15297|PPM1D_HUMAN@478
sp|P78549|NTH_HUMAN@118			sp|P40222|TXLNA_HUMAN@523			sp|Q96Q89|KI20B_HUMAN@480
sp|P08240|SRPRA_HUMAN@363			sp|Q96JI7|SPTCS_HUMAN@1427			sp|P17812|PYRG1_HUMAN@299
sp|O15226|NKRF_HUMAN@242			sp|P49736|MCM2_HUMAN@624			sp|Q7Z5L9|I2BP2_HUMAN@65
sp|Q9ULC3|RAB23_HUMAN@130			sp|Q9NU22|MDN1_HUMAN@4192			sp|O43683|BUB1_HUMAN@339
sp|Q6VMQ6|MCAF1_HUMAN@451			sp|Q16877|F264_HUMAN@430			sp|P48200|IREB2_HUMAN@201
sp|Q8TDN6|BRX1_HUMAN@52			sp|Q15020|SART3_HUMAN@670			sp|A0PJZ3|GXLT2_HUMAN@192
sp|Q9UKV3|ACINU_HUMAN@1083			sp|Q6ZV89|SH2D5_HUMAN@160			sp|Q8NHM5|KDM2B_HUMAN@1278
sp|P35998|PRS7_HUMAN@270			sp|Q92616|GCN1_HUMAN@648			sp|Q3SXY8|AR13B_HUMAN@367
sp|O00471|EXOC5_HUMAN@71			sp|Q9BVI4|NOC4L_HUMAN@100			sp|A2RRP1|NBAS_HUMAN@256
REV_sp|Q9NZR2|LRP1B_HUMAN@3582			sp|Q2TAY7|SMU1_HUMAN@219			sp|Q49A26|GLYR1_HUMAN@242
sp|Q9H974|QTRT2_HUMAN@324			sp|Q8WUJ0|STYX_HUMAN@14			sp|Q13099|IFT88_HUMAN@401
sp|Q92990|GLMN_HUMAN@537			sp|Q9NU22|MDN1_HUMAN@2192			sp|Q5T7B8|KIF24_HUMAN@1246
sp|Q9P1Y6|PHRF1_HUMAN@658			sp|Q9UPQ9|TNR6B_HUMAN@600			sp|P49792|RBP2_HUMAN@815
sp|Q6ZN17|LN28B_HUMAN@201			sp|O15037|KHNYN_HUMAN@320			sp|P17097|ZNF7_HUMAN@262
sp|Q9P258|RCC2_HUMAN@305			sp|Q9BZG1|RAB34_HUMAN@19			sp|O75569|PRKRA_HUMAN@163
sp|Q9H649|NSUN3_HUMAN@214			sp|Q86U38|NOP9_HUMAN@138			sp|P01130|LDLR_HUMAN@296
sp|P07437|TBB5_HUMAN@129			sp|P53779|MK10_HUMAN@283			sp|Q8IVV7|GID4_HUMAN@90
sp|Q9H165|BC11A_HUMAN@163			sp|Q969F9|HPS3_HUMAN@52			sp|Q5RKV6|EXOS6_HUMAN@98
sp|Q7Z5K2|WAPL_HUMAN@964			sp|P07948|LYN_HUMAN@381			sp|A5YKK6|CNOT1_HUMAN@624
sp|Q9H1I8|ASCC2_HUMAN@276			sp|Q96QK1|VPS35_HUMAN@653			sp|Q9NXJ5|PGPI_HUMAN@99
sp|Q7Z3U7|MON2_HUMAN@1453			sp|P08651|NFIC_HUMAN@88			sp|Q16851|UGPA_HUMAN@123
sp|Q7L5N1|CSN6_HUMAN@299			sp|P35249|RFC4_HUMAN@48			sp|P27544|CERS1_HUMAN@270
sp|Q9UPY8|MARE3_HUMAN@182			sp|P24468|COT2_HUMAN@326			sp|O60237|MYPT2_HUMAN@723
sp|O43823|AKAP8_HUMAN@173			sp|Q9H583|HEAT1_HUMAN@1942			REV_sp|Q9NYQ8|FAT2_HUMAN@83
sp|Q14997|PSME4_HUMAN@710			sp|Q6R327|RICTR_HUMAN@1317			sp|Q8WX92|NELFB_HUMAN@269
sp|Q16555|DPYL2_HUMAN@504			sp|Q8N9A8|NEPR1_HUMAN@23			sp|Q13464|ROCK1_HUMAN@1300
sp|Q14168|MPP2_HUMAN@270			sp|O95155|UBE4B_HUMAN@113			sp|Q12802|AKP13_HUMAN@2101
sp|P54252|ATX3_HUMAN@316			sp|P51003|PAPOA_HUMAN@293			sp|Q9BWF3|RBM4_HUMAN@89
sp|Q4V328|GRAP1_HUMAN@744			sp|Q9Y6Y8|S23IP_HUMAN@604			sp|Q9C0B7|TNG6_HUMAN@199
sp|P06733|ENOA_HUMAN@399			sp|Q14566|MCM6_HUMAN@393			sp|Q8TEA1|NSUN6_HUMAN@415
sp|O00458|IFRD1_HUMAN@178			sp|Q8WWI1|LMO7_HUMAN@98			sp|P54132|BLM_HUMAN@607
sp|P57721|PCBP3_HUMAN@86			sp|Q9H3U1|UN45A_HUMAN@34			sp|Q8N1G0|ZN687_HUMAN@672
sp|Q12824|SNF5_HUMAN@167			sp|Q9BRX9|WDR83_HUMAN@23			sp|Q8N653|LZTR1_HUMAN@342
sp|O60941|DTNB_HUMAN@309			sp|P53602|MVD1_HUMAN@82			sp|P42695|CNDD3_HUMAN@330
sp|Q14332|FZD2_HUMAN@306			sp|O43929|ORC4_HUMAN@16			sp|Q15048|LRC14_HUMAN@109
sp|Q9Y6J9|TAF6L_HUMAN@230			sp|Q5TGY3|AHDC1_HUMAN@1422			sp|Q96KR6|F210B_HUMAN@77
sp|Q96CS4|ZN689_HUMAN@70			sp|Q5VWG9|TAF3_HUMAN@431			sp|O00233|PSMD9_HUMAN@59
sp|Q8N335|GPD1L_HUMAN@104			sp|Q86Y56|DAAF5_HUMAN@555			sp|O95394|AGM1_HUMAN@348
sp|P06400|RB_HUMAN@666			sp|O14641|DVL2_HUMAN@354			sp|Q9Y3S1|WNK2_HUMAN@2062
sp|P60174|TPIS_HUMAN@67			sp|Q5VUA4|ZN318_HUMAN@2040			sp|Q9H9C1|SPE39_HUMAN@170
sp|Q9UPN7|PP6R1_HUMAN@37			sp|Q68E01|INT3_HUMAN@80			sp|Q53EQ6|TIGD5_HUMAN@381
sp|P23528|COF1_HUMAN@139			sp|P54886|P5CS_HUMAN@88			sp|O43592|XPOT_HUMAN@877
sp|Q8TF76|HASP_HUMAN@153			sp|Q8N0Z3|SPICE_HUMAN@796			sp|Q96II8|LRCH3_HUMAN@531
sp|P16615|AT2A2_HUMAN@560			sp|Q9NQT8|KI13B_HUMAN@1529			sp|Q9C073|F117A_HUMAN@28
sp|Q9Y224|RTRAF_HUMAN@69			sp|Q9BT25|HAUS8_HUMAN@354			sp|Q15262|PTPRK_HUMAN@851
sp|Q86W56|PARG_HUMAN@57			sp|Q96B36|AKTS1_HUMAN@61			sp|Q9NYH9|UTP6_HUMAN@566
sp|Q8IWV8|UBR2_HUMAN@1619			sp|Q7L1V2|MON1B_HUMAN@268			sp|Q06481|APLP2_HUMAN@116
sp|Q9NWZ8|GEMI8_HUMAN@180			sp|Q9BZ68|FR8P1_HUMAN@191			sp|Q99496|RING2_HUMAN@75
sp|Q96QR8|PURB_HUMAN@273			sp|Q8NAN2|MIGA1_HUMAN@128			sp|P50443|S26A2_HUMAN@700
sp|P06400|RB_HUMAN@278			sp|P21281|VATB2_HUMAN@162			sp|Q9H270|VPS11_HUMAN@266
sp|Q99700|ATX2_HUMAN@332			sp|Q8TAT6|NPL4_HUMAN@355			sp|Q5VWQ0|RSBN1_HUMAN@671
sp|Q14669|TRIPC_HUMAN@1276			sp|Q7Z401|MYCPP_HUMAN@1137			sp|Q9C0E8|LNP_HUMAN@149
sp|Q9ULK4|MED23_HUMAN@98			sp|P51114|FXR1_HUMAN@211			sp|Q8WV41|SNX33_HUMAN@188
sp|O60306|AQR_HUMAN@28			sp|O76094|SRP72_HUMAN@128			sp|Q9H237|PORCN_HUMAN@375
sp|Q96N66|MBOA7_HUMAN@280			sp|Q9UHJ6|SHPK_HUMAN@132			sp|O75122|CLAP2_HUMAN@221
sp|P54760|EPHB4_HUMAN@630			sp|Q8IY37|DHX37_HUMAN@456			sp|Q9Y296|TPPC4_HUMAN@195
sp|P38117|ETFB_HUMAN@71			sp|Q3SY69|AL1L2_HUMAN@683			sp|O76062|ERG24_HUMAN@406
sp|Q9P2E9|RRBP1_HUMAN@933			sp|Q9BZI7|REN3B_HUMAN@453			sp|Q96QF0|RAB3I_HUMAN@395
sp|Q9Y3C6|PPIL1_HUMAN@133			sp|Q9Y3E5|PTH2_HUMAN@111			sp|Q9UKT4|FBX5_HUMAN@202
sp|Q03468|ERCC6_HUMAN@1464			sp|P17812|PYRG1_HUMAN@218			sp|Q8NG31|KNL1_HUMAN@849
sp|P50579|MAP2_HUMAN@121			sp|Q6VUC0|AP2E_HUMAN@329			sp|O95613|PCNT_HUMAN@2150
sp|A0AVT1|UBA6_HUMAN@546			sp|Q86Y56|DAAF5_HUMAN@173			sp|P51580|TPMT_HUMAN@165
sp|P40938|RFC3_HUMAN@32			sp|Q9NX47|MARH5_HUMAN@188			sp|Q6ZRQ5|MMS22_HUMAN@111
sp|Q9BVK2|ALG8_HUMAN@218			sp|O94874|UFL1_HUMAN@143			sp|Q96KP1|EXOC2_HUMAN@789
sp|Q15648|MED1_HUMAN@489			sp|Q75QN2|INT8_HUMAN@580			sp|P16615|AT2A2_HUMAN@669
sp|Q1KMD3|HNRL2_HUMAN@602			sp|Q96T58|MINT_HUMAN@598			sp|Q9Y314|NOSIP_HUMAN@185
sp|Q9H9A6|LRC40_HUMAN@438			sp|P10588|NR2F6_HUMAN@203			sp|P46100|ATRX_HUMAN@2404
sp|O15173|PGRC2_HUMAN@159			sp|Q2M1P5|KIF7_HUMAN@415			sp|Q9Y4D8|HECD4_HUMAN@1636
sp|P18615|NELFE_HUMAN@297			sp|Q8N3U4|STAG2_HUMAN@632			sp|Q9NWU5|RM22_HUMAN@70
sp|Q9P2B4|CT2NL_HUMAN@76			sp|Q86X55|CARM1_HUMAN@26			sp|P31689|DNJA1_HUMAN@302
sp|Q96BN8|OTUL_HUMAN@17			sp|Q8N122|RPTOR_HUMAN@86			sp|P11177|ODPB_HUMAN@263
sp|Q12841|FSTL1_HUMAN@221			sp|O94822|LTN1_HUMAN@91			sp|Q9NRP0|OSTC_HUMAN@14
sp|P40222|TXLNA_HUMAN@523			sp|Q96EY7|PTCD3_HUMAN@551			sp|Q8NCM8|DYHC2_HUMAN@1104
sp|Q96JI7|SPTCS_HUMAN@1427			sp|Q9UNM6|PSD13_HUMAN@357			sp|P49454|CENPF_HUMAN@414
sp|P49736|MCM2_HUMAN@624			sp|Q7Z3K3|POGZ_HUMAN@547			sp|Q9UMZ2|SYNRG_HUMAN@208
sp|Q9NU22|MDN1_HUMAN@4192			sp|Q15643|TRIPB_HUMAN@1329			sp|Q709C8|VP13C_HUMAN@2588
sp|Q16877|F264_HUMAN@430			sp|P41250|GARS_HUMAN@180			sp|P49841|GSK3B_HUMAN@317
sp|Q15020|SART3_HUMAN@670			sp|Q9NZJ7|MTCH1_HUMAN@206			sp|Q10567|AP1B1_HUMAN@921
sp|Q92616|GCN1_HUMAN@648			sp|P55011|S12A2_HUMAN@791			sp|Q9NZ08|ERAP1_HUMAN@443
sp|Q9BVI4|NOC4L_HUMAN@100			sp|Q9NUJ3|T11L1_HUMAN@495			sp|Q9H7S9|ZN703_HUMAN@96
sp|Q2TAY7|SMU1_HUMAN@219			sp|P48444|COPD_HUMAN@94			sp|Q5K4L6|S27A3_HUMAN@65
sp|Q9NU22|MDN1_HUMAN@2192			sp|Q9Y4D8|HECD4_HUMAN@1783			sp|Q96ME1|FXL18_HUMAN@423
sp|Q8WUJ0|STYX_HUMAN@14			sp|O60232|ZNRD2_HUMAN@125			sp|Q5T5X7|BEND3_HUMAN@179
sp|Q9BZG1|RAB34_HUMAN@19			sp|Q14964|RB39A_HUMAN@23			sp|Q96DR7|ARHGQ_HUMAN@593
sp|Q86U38|NOP9_HUMAN@138			sp|Q9UPQ9|TNR6B_HUMAN@557			sp|Q9H967|WDR76_HUMAN@214
sp|P53779|MK10_HUMAN@283			sp|Q14315|FLNC_HUMAN@2154			sp|Q14203|DCTN1_HUMAN@888
sp|P07948|LYN_HUMAN@381			sp|Q15650|TRIP4_HUMAN@86			sp|Q8IZP0|ABI1_HUMAN@33
sp|Q96QK1|VPS35_HUMAN@653			sp|O15027|SC16A_HUMAN@1293			sp|Q9BZL6|KPCD2_HUMAN@74
sp|P08651|NFIC_HUMAN@88			sp|Q8N726|ARF_HUMAN@15			sp|Q96SK2|TM209_HUMAN@422
sp|O94916|NFAT5_HUMAN@270			sp|Q9NVI1|FANCI_HUMAN@1025			sp|Q9H3K6|BOLA2_HUMAN@59
sp|P35249|RFC4_HUMAN@48			sp|Q9BTY2|FUCO2_HUMAN@277			sp|P62191|PRS4_HUMAN@58
sp|O94915|FRYL_HUMAN@288			sp|Q9C0B0|UNK_HUMAN@696			sp|P22102|PUR2_HUMAN@506
sp|Q9H583|HEAT1_HUMAN@1942			sp|Q02880|TOP2B_HUMAN@271			sp|Q9UPS6|SET1B_HUMAN@931
sp|Q6R327|RICTR_HUMAN@1317			sp|P42679|MATK_HUMAN@16			sp|Q7L8L6|FAKD5_HUMAN@525
sp|O95155|UBE4B_HUMAN@113			sp|P0CG22|DR4L1_HUMAN@212			sp|Q2KHR2|RFX7_HUMAN@63
sp|Q9Y6Y8|S23IP_HUMAN@604			sp|Q02241|KIF23_HUMAN@165			sp|Q9H9E3|COG4_HUMAN@589
sp|P51003|PAPOA_HUMAN@293			sp|Q9NPD3|EXOS4_HUMAN@97			sp|Q9GZT9|EGLN1_HUMAN@208
sp|Q14566|MCM6_HUMAN@393			sp|Q12923|PTN13_HUMAN@1467			sp|P51606|RENBP_HUMAN@249
sp|Q08211|DHX9_HUMAN@578			sp|Q9BYG4|PAR6G_HUMAN@112			sp|O00299|CLIC1_HUMAN@59
sp|Q8WWI1|LMO7_HUMAN@98			sp|Q9HCH0|NCK5L_HUMAN@787			sp|P10398|ARAF_HUMAN@136
sp|Q9H3U1|UN45A_HUMAN@34			sp|Q9BTY2|FUCO2_HUMAN@294			sp|O95239|KIF4A_HUMAN@1159
sp|Q9BRX9|WDR83_HUMAN@23			sp|Q9NZJ4|SACS_HUMAN@814			sp|P11142|HSP7C_HUMAN@603
sp|P53602|MVD1_HUMAN@82			sp|Q15349|KS6A2_HUMAN@429			sp|Q70E73|RAPH1_HUMAN@847
sp|O43929|ORC4_HUMAN@16			sp|Q9BW27|NUP85_HUMAN@51			sp|Q8IYW5|RN168_HUMAN@348
sp|Q5TGY3|AHDC1_HUMAN@1422			sp|Q9UBQ5|EIF3K_HUMAN@87			sp|P49773|HINT1_HUMAN@84
sp|Q9UIA9|XPO7_HUMAN@123			sp|Q96T51|RUFY1_HUMAN@351			sp|Q96SW2|CRBN_HUMAN@188
sp|Q5VWG9|TAF3_HUMAN@431			sp|P50613|CDK7_HUMAN@312			sp|Q9P2J5|SYLC_HUMAN@573
sp|Q96EK7|F120B_HUMAN@499			sp|Q9GZP1|NRSN2_HUMAN@115			sp|P35221|CTNA1_HUMAN@116
sp|Q86Y56|DAAF5_HUMAN@555			sp|Q9BUN5|CC28B_HUMAN@13			sp|O60563|CCNT1_HUMAN@111
sp|O14641|DVL2_HUMAN@354			sp|P46459|NSF_HUMAN@264			sp|Q5T5U3|RHG21_HUMAN@1700
sp|Q5VUA4|ZN318_HUMAN@2040			sp|Q63HN8|RN213_HUMAN@856			sp|Q96QK1|VPS35_HUMAN@253
sp|Q6PJG6|BRAT1_HUMAN@366			sp|Q9BSF8|BTBDA_HUMAN@419			sp|O75170|PP6R2_HUMAN@665
sp|Q68E01|INT3_HUMAN@80			sp|P46100|ATRX_HUMAN@618			sp|O00750|P3C2B_HUMAN@384
sp|P54886|P5CS_HUMAN@88			sp|Q99460|PSMD1_HUMAN@806			sp|Q02218|ODO1_HUMAN@283
sp|Q9NQT8|KI13B_HUMAN@1529			sp|P49327|FAS_HUMAN@2202			sp|O94761|RECQ4_HUMAN@194
sp|P33981|TTK_HUMAN@322			sp|Q14691|PSF1_HUMAN@75			sp|Q9NXW9|ALKB4_HUMAN@126
sp|P0C7T5|ATX1L_HUMAN@11			sp|Q15014|MO4L2_HUMAN@165			sp|P50219|MNX1_HUMAN@58
sp|Q96FV9|THOC1_HUMAN@396			sp|Q9H1B7|I2BPL_HUMAN@730			sp|Q9Y2Y0|AR2BP_HUMAN@149
sp|Q9BZ68|FR8P1_HUMAN@191			sp|Q96BK5|PINX1_HUMAN@265			sp|Q5TCZ1|SPD2A_HUMAN@749
sp|Q8ND04|SMG8_HUMAN@72			sp|Q99497|PARK7_HUMAN@46			sp|Q04724|TLE1_HUMAN@89
sp|Q96DX4|RSPRY_HUMAN@190			sp|P63167|DYL1_HUMAN@24			sp|Q5THK1|PR14L_HUMAN@541
sp|Q8NAN2|MIGA1_HUMAN@128			sp|Q99707|METH_HUMAN@798			sp|Q5SXM2|SNPC4_HUMAN@759
sp|Q7Z401|MYCPP_HUMAN@1137			sp|Q86UL3|GPAT4_HUMAN@285			sp|Q9Y2K2|SIK3_HUMAN@333
sp|O76094|SRP72_HUMAN@128			sp|Q99538|LGMN_HUMAN@50			sp|Q8TB03|CX038_HUMAN@12
sp|P51114|FXR1_HUMAN@211			sp|P78527|PRKDC_HUMAN@2342			sp|Q5FWF5|ESCO1_HUMAN@515
sp|Q9UHJ6|SHPK_HUMAN@132			sp|Q9BTA9|WAC_HUMAN@553			sp|Q12788|TBL3_HUMAN@728
sp|Q8IY37|DHX37_HUMAN@456			sp|Q96SI9|STRBP_HUMAN@142			sp|Q96QR8|PURB_HUMAN@17
sp|Q3SY69|AL1L2_HUMAN@683			sp|P05388|RLA0_HUMAN@119			sp|A6H8Y1|BDP1_HUMAN@2170
sp|P19174|PLCG1_HUMAN@247			sp|Q96T51|RUFY1_HUMAN@320			sp|Q9HB07|MYG1_HUMAN@270
sp|Q9BZI7|REN3B_HUMAN@453			sp|Q9H0A0|NAT10_HUMAN@505			sp|Q9NPG3|UBN1_HUMAN@524
sp|Q9Y3E5|PTH2_HUMAN@111			sp|Q9H7X3|ZN696_HUMAN@74			sp|Q9H900|ZWILC_HUMAN@7
sp|O75410|TACC1_HUMAN@78			sp|Q3T8J9|GON4L_HUMAN@147			sp|Q15170|TCAL1_HUMAN@90
sp|P17812|PYRG1_HUMAN@218			sp|Q9Y5T5|UBP16_HUMAN@191			sp|P46063|RECQ1_HUMAN@49
sp|Q9UGL1|KDM5B_HUMAN@147			sp|Q96L73|NSD1_HUMAN@2273			sp|Q9P270|SLAI2_HUMAN@165
sp|Q6VUC0|AP2E_HUMAN@329			sp|O15228|GNPAT_HUMAN@54			sp|Q9Y4A5|TRRAP_HUMAN@2513
sp|Q86Y56|DAAF5_HUMAN@173			sp|Q9NRF8|PYRG2_HUMAN@216			sp|Q9UIW2|PLXA1_HUMAN@1296
sp|Q9NX47|MARH5_HUMAN@188			sp|Q9ULU4|ZMYD8_HUMAN@138			sp|Q9BSU1|PHAF1_HUMAN@82
sp|Q9Y6B7|AP4B1_HUMAN@491			sp|Q99570|PI3R4_HUMAN@385			sp|Q86Y56|DAAF5_HUMAN@138
sp|O94874|UFL1_HUMAN@143			sp|Q5T7W7|TSTD2_HUMAN@355			sp|Q9UL03|INT6_HUMAN@264
sp|Q14CX7|NAA25_HUMAN@46			sp|Q4VC44|FWCH1_HUMAN@657			sp|O95789|ZMYM6_HUMAN@756
sp|O15344|TRI18_HUMAN@578			sp|Q8N8D1|PDCD7_HUMAN@159			sp|P78332|RBM6_HUMAN@277
sp|Q75QN2|INT8_HUMAN@580			sp|Q5VVJ2|MYSM1_HUMAN@445			sp|Q12947|FOXF2_HUMAN@157
sp|Q96T58|MINT_HUMAN@598			sp|P29144|TPP2_HUMAN@28			sp|Q9UN86|G3BP2_HUMAN@73
sp|P10588|NR2F6_HUMAN@203			sp|O43318|M3K7_HUMAN@588			sp|P42694|HELZ_HUMAN@1055
sp|Q2M1P5|KIF7_HUMAN@415			sp|Q9UIG0|BAZ1B_HUMAN@1006			sp|P53675|CLH2_HUMAN@617
sp|Q8N3U4|STAG2_HUMAN@632			sp|P17676|CEBPB_HUMAN@184			sp|Q14699|RFTN1_HUMAN@433
sp|Q9H426|RIMS4_HUMAN@265			sp|P23526|SAHH_HUMAN@228			sp|P51654|GPC3_HUMAN@349
sp|Q86X55|CARM1_HUMAN@26			sp|Q15154|PCM1_HUMAN@1717			sp|P29144|TPP2_HUMAN@150
sp|Q8N122|RPTOR_HUMAN@86			sp|P35251|RFC1_HUMAN@752			sp|P50990|TCPQ_HUMAN@148
sp|O94822|LTN1_HUMAN@91			sp|Q96GM8|TOE1_HUMAN@80			sp|Q9NVI1|FANCI_HUMAN@1184
sp|Q9UNM6|PSD13_HUMAN@357			sp|O14777|NDC80_HUMAN@449			sp|Q92870|APBB2_HUMAN@148
sp|Q7Z3K3|POGZ_HUMAN@547			sp|P50552|VASP_HUMAN@334			sp|P37198|NUP62_HUMAN@475
sp|Q15643|TRIPB_HUMAN@1329			sp|O75152|ZC11A_HUMAN@209			sp|Q96L50|LLR1_HUMAN@266
sp|P41250|GARS_HUMAN@180			sp|Q9UPN3|MACF1_HUMAN@5049			sp|Q9Y3C0|WASC3_HUMAN@48
sp|Q9NZJ7|MTCH1_HUMAN@206			sp|P62993|GRB2_HUMAN@32			sp|Q13011|ECH1_HUMAN@187
sp|P48444|COPD_HUMAN@94			sp|Q08J23|NSUN2_HUMAN@93			sp|Q8N1F7|NUP93_HUMAN@422
sp|Q9NUJ3|T11L1_HUMAN@495			sp|P31277|HXD11_HUMAN@148			sp|Q9H553|ALG2_HUMAN@59
sp|Q15173|2A5B_HUMAN@113			sp|Q96L91|EP400_HUMAN@1761			sp|Q9Y606|PUS1_HUMAN@260
sp|O60232|ZNRD2_HUMAN@125			sp|P21333|FLNA_HUMAN@2543			sp|P07814|SYEP_HUMAN@350
sp|Q93034|CUL5_HUMAN@104			sp|Q92616|GCN1_HUMAN@1275			sp|Q8WWB7|GLMP_HUMAN@300
sp|Q6NUN9|ZN746_HUMAN@425			sp|P08621|RU17_HUMAN@39			sp|O60841|IF2P_HUMAN@749
sp|Q14315|FLNC_HUMAN@2154			REV_sp|Q9NRM6|I17RB_HUMAN@416			sp|Q8TBC4|UBA3_HUMAN@139
sp|Q15650|TRIP4_HUMAN@86			sp|P30084|ECHM_HUMAN@111			sp|Q86V85|GP180_HUMAN@91
sp|O15027|SC16A_HUMAN@1293			sp|P30050|RL12_HUMAN@17			sp|Q9Y5Q0|FADS3_HUMAN@24
sp|Q8N726|ARF_HUMAN@15			sp|O60343|TBCD4_HUMAN@885			sp|P21980|TGM2_HUMAN@269
sp|Q9NVI1|FANCI_HUMAN@1025			sp|P62495|ERF1_HUMAN@127			sp|Q9Y4P1|ATG4B_HUMAN@74
sp|Q9BTY2|FUCO2_HUMAN@277			sp|Q96AC1|FERM2_HUMAN@426			sp|Q674X7|KAZRN_HUMAN@312
sp|Q9C0B0|UNK_HUMAN@696			sp|Q16658|FSCN1_HUMAN@397			sp|P27708|PYR1_HUMAN@897
sp|Q02880|TOP2B_HUMAN@271			sp|Q9UIS9|MBD1_HUMAN@28			sp|Q05823|RN5A_HUMAN@639
sp|P0CG22|DR4L1_HUMAN@212			sp|P30876|RPB2_HUMAN@892			sp|Q7Z478|DHX29_HUMAN@990
sp|Q02241|KIF23_HUMAN@165			sp|Q9UHD8|SEPT9_HUMAN@248			sp|Q6PD62|CTR9_HUMAN@533
sp|Q9NPD3|EXOS4_HUMAN@97			sp|Q8NDT2|RB15B_HUMAN@128			sp|Q99832|TCPH_HUMAN@364
sp|Q12923|PTN13_HUMAN@1467			sp|Q9UBD5|ORC3_HUMAN@483			sp|Q96HE9|PRR11_HUMAN@161
sp|P61599|NAA20_HUMAN@9			sp|Q02543|RL18A_HUMAN@16			sp|Q76FK4|NOL8_HUMAN@556
sp|P52789|HXK2_HUMAN@909			sp|Q9NZQ3|SPN90_HUMAN@376			sp|Q5VZ89|DEN4C_HUMAN@1086
sp|Q9H7N4|SFR19_HUMAN@826			sp|Q96QE3|ATAD5_HUMAN@1529			sp|Q01082|SPTB2_HUMAN@964
sp|Q14192|FHL2_HUMAN@132			sp|Q7L014|DDX46_HUMAN@646			sp|P33897|ABCD1_HUMAN@39
sp|Q9BW27|NUP85_HUMAN@51			sp|Q8N5W9|RFLB_HUMAN@81			sp|Q99741|CDC6_HUMAN@376
sp|Q96T51|RUFY1_HUMAN@351			sp|Q8N5I9|NOPC1_HUMAN@13			sp|Q13330|MTA1_HUMAN@281
sp|P50613|CDK7_HUMAN@312			sp|P55060|XPO2_HUMAN@842			sp|P62380|TBPL1_HUMAN@139
sp|Q9GZP1|NRSN2_HUMAN@115			sp|Q9NT62|ATG3_HUMAN@182			sp|O75487|GPC4_HUMAN@341
sp|P46459|NSF_HUMAN@264			sp|O15235|RT12_HUMAN@93			sp|O94906|PRP6_HUMAN@913
sp|Q63HN8|RN213_HUMAN@856			sp|Q14974|IMB1_HUMAN@765			sp|Q5TB80|CE162_HUMAN@1235
sp|Q9BUN5|CC28B_HUMAN@13			sp|P03455|HEMA_I76AI@72			sp|P61927|RL37_HUMAN@37
sp|P46100|ATRX_HUMAN@618			sp|P20073|ANXA7_HUMAN@413			sp|Q6P1L6|ZN343_HUMAN@411
sp|Q99460|PSMD1_HUMAN@806			sp|Q9H3U1|UN45A_HUMAN@118			sp|Q86YH6|DLP1_HUMAN@263
sp|P49327|FAS_HUMAN@2202			sp|Q9H840|GEMI7_HUMAN@44			sp|P26196|DDX6_HUMAN@102
sp|Q14691|PSF1_HUMAN@75			sp|Q9H845|ACAD9_HUMAN@327			sp|Q14149|MORC3_HUMAN@694
sp|Q15014|MO4L2_HUMAN@165			sp|P46013|KI67_HUMAN@824			sp|Q07864|DPOE1_HUMAN@2164
sp|Q9H1B7|I2BPL_HUMAN@730			sp|Q92793|CBP_HUMAN@1710			sp|Q9BVQ7|AFG2B_HUMAN@509
sp|Q96BK5|PINX1_HUMAN@265			sp|Q96J01|THOC3_HUMAN@25			sp|Q9HBH1|DEFM_HUMAN@68
sp|Q99497|PARK7_HUMAN@46			sp|P12532|KCRU_HUMAN@89			sp|Q9ULF5|S39AA_HUMAN@598
sp|P63167|DYL1_HUMAN@24			sp|P19623|SPEE_HUMAN@123			sp|Q16512|PKN1_HUMAN@776
sp|Q9BVP2|GNL3_HUMAN@113			sp|O75116|ROCK2_HUMAN@314			sp|Q86W42|THOC6_HUMAN@314
sp|Q99707|METH_HUMAN@798			sp|O75521|ECI2_HUMAN@282			sp|Q8IWJ2|GCC2_HUMAN@889
sp|Q86UL3|GPAT4_HUMAN@285			sp|O75475|PSIP1_HUMAN@204			sp|P52209|6PGD_HUMAN@289
sp|P78527|PRKDC_HUMAN@2342			sp|Q8WYQ5|DGCR8_HUMAN@128			sp|Q96S15|WDR24_HUMAN@477
sp|Q9BTA9|WAC_HUMAN@553			sp|Q6P2E9|EDC4_HUMAN@976			sp|Q13315|ATM_HUMAN@1177
sp|Q96SI9|STRBP_HUMAN@142			sp|P61081|UBC12_HUMAN@65			sp|P62753|RS6_HUMAN@12
sp|P05388|RLA0_HUMAN@119			sp|P13861|KAP2_HUMAN@359			sp|P25205|MCM3_HUMAN@263
sp|Q96T51|RUFY1_HUMAN@320			sp|P37268|FDFT_HUMAN@6			sp|O95639|CPSF4_HUMAN@41
sp|Q9H0A0|NAT10_HUMAN@505			sp|O75792|RNH2A_HUMAN@29			sp|Q9Y3T6|R3HC1_HUMAN@94
sp|Q3T8J9|GON4L_HUMAN@147			sp|Q6ZU80|CE128_HUMAN@878			sp|P48735|IDHP_HUMAN@418
sp|Q9Y5T5|UBP16_HUMAN@191			sp|Q8TAQ2|SMRC2_HUMAN@635			sp|A0JNW5|BLT3B_HUMAN@744
sp|Q96L73|NSD1_HUMAN@2273			sp|P12236|ADT3_HUMAN@57			sp|Q9UJF2|NGAP_HUMAN@415
sp|Q9NRF8|PYRG2_HUMAN@216			sp|P98194|AT2C1_HUMAN@162			sp|Q96HP0|DOCK6_HUMAN@1853
sp|O15228|GNPAT_HUMAN@54			sp|Q96BY7|ATG2B_HUMAN@243			sp|P29590|PML_HUMAN@60
sp|Q9ULU4|ZMYD8_HUMAN@138			sp|P49588|SYAC_HUMAN@671			sp|Q7Z406|MYH14_HUMAN@718
sp|Q4VC44|FWCH1_HUMAN@657			sp|Q9UKU7|ACAD8_HUMAN@251			sp|P27708|PYR1_HUMAN@1296
sp|Q7Z5K2|WAPL_HUMAN@831			sp|Q9UPV9|TRAK1_HUMAN@713			sp|P17812|PYRG1_HUMAN@30
sp|Q96JQ2|CLMN_HUMAN@353			sp|P35520|CBS_HUMAN@15			sp|P78312|F193A_HUMAN@1237
sp|Q5VVJ2|MYSM1_HUMAN@445			sp|Q92618|ZN516_HUMAN@1016			sp|Q8TDM6|DLG5_HUMAN@926
sp|P29144|TPP2_HUMAN@28			sp|O43772|MCAT_HUMAN@136			sp|Q8N999|RLIG1_HUMAN@302
sp|P23526|SAHH_HUMAN@228			sp|Q49AR2|CE022_HUMAN@195			sp|Q6UX53|TMT1B_HUMAN@203
sp|P17676|CEBPB_HUMAN@184			sp|P07858|CATB_HUMAN@211			sp|Q9NVM4|ANM7_HUMAN@262
sp|Q5W0B1|OBI1_HUMAN@338			sp|O15020|SPTN2_HUMAN@1140			sp|O14757|CHK1_HUMAN@48
sp|Q15154|PCM1_HUMAN@1717			sp|P17023|ZNF19_HUMAN@445			sp|Q96QU8|XPO6_HUMAN@315
sp|P35251|RFC1_HUMAN@752			sp|Q96MH2|HEXI2_HUMAN@80			sp|Q96GX5|GWL_HUMAN@455
sp|Q96GM8|TOE1_HUMAN@80			sp|Q92974|ARHG2_HUMAN@342			sp|Q9H3R0|KDM4C_HUMAN@375
sp|O14777|NDC80_HUMAN@449			REV_sp|Q6RI45|BRWD3_HUMAN@920			sp|Q6NUN9|ZN746_HUMAN@155
sp|P50552|VASP_HUMAN@334			sp|P29992|GNA11_HUMAN@144			sp|P51587|BRCA2_HUMAN@1853
sp|O75152|ZC11A_HUMAN@209			sp|O60287|NPA1P_HUMAN@169			sp|P17482|HXB9_HUMAN@161
sp|Q96HN2|SAHH3_HUMAN@187			sp|Q6IQ22|RAB12_HUMAN@183			sp|Q9UGI8|TES_HUMAN@46
sp|P62993|GRB2_HUMAN@32			sp|Q96AC1|FERM2_HUMAN@520			sp|Q9NRL2|BAZ1A_HUMAN@547
sp|Q8IZH2|XRN1_HUMAN@657			sp|Q9UQ35|SRRM2_HUMAN@891			sp|Q9H4B0|OSGL1_HUMAN@216
sp|Q08J23|NSUN2_HUMAN@93			sp|Q9NR09|BIRC6_HUMAN@1336			sp|P41240|CSK_HUMAN@290
sp|P31277|HXD11_HUMAN@148			sp|O43264|ZW10_HUMAN@650			sp|Q96P70|IPO9_HUMAN@864
sp|Q9Y2D8|ADIP_HUMAN@547			sp|Q9BVP2|GNL3_HUMAN@234			sp|Q96CX2|KCD12_HUMAN@239
sp|Q9HBH0|RHOF_HUMAN@30			sp|Q8IVH4|MMAA_HUMAN@184			sp|Q8IXW5|RPAP2_HUMAN@277
sp|P21333|FLNA_HUMAN@2543			sp|Q9HAS0|NJMU_HUMAN@153			sp|Q92620|PRP16_HUMAN@27
sp|Q92616|GCN1_HUMAN@1275			sp|P62195|PRS8_HUMAN@209			sp|Q13242|SRSF9_HUMAN@80
sp|Q96JH8|RADIL_HUMAN@671			sp|Q16531|DDB1_HUMAN@378			sp|Q8TBC4|UBA3_HUMAN@249
sp|P08621|RU17_HUMAN@39			sp|Q6P2I3|FAH2B_HUMAN@301			sp|P23142|FBLN1_HUMAN@341
sp|P09884|DPOLA_HUMAN@592			sp|P31930|QCR1_HUMAN@380			sp|Q6PGQ7|BORA_HUMAN@324
sp|P30084|ECHM_HUMAN@111			sp|O75376|NCOR1_HUMAN@994			sp|Q14671|PUM1_HUMAN@1007
sp|P53804|TTC3_HUMAN@823			sp|Q96T88|UHRF1_HUMAN@410			sp|Q14008|CKAP5_HUMAN@604
sp|P62495|ERF1_HUMAN@127			sp|Q9NZL9|MAT2B_HUMAN@58			sp|Q7Z3K3|POGZ_HUMAN@1219
sp|O60343|TBCD4_HUMAN@885			sp|Q9NXE4|NSMA3_HUMAN@164			sp|Q15477|SKI2_HUMAN@1207
sp|P30050|RL12_HUMAN@17			sp|Q9BW83|IFT27_HUMAN@8			sp|Q96JM3|CHAP1_HUMAN@592
sp|Q96AC1|FERM2_HUMAN@426			sp|O75521|ECI2_HUMAN@380			sp|Q96PM5|ZN363_HUMAN@119
sp|Q16658|FSCN1_HUMAN@397			sp|O95295|SNAPN_HUMAN@66			sp|Q13838|DX39B_HUMAN@198
sp|P30876|RPB2_HUMAN@892			sp|P49116|NR2C2_HUMAN@414			sp|Q9BUR4|TCAB1_HUMAN@463
sp|Q9BY67|CADM1_HUMAN@220			sp|Q86UK7|ZN598_HUMAN@835			sp|Q66K14|TBC9B_HUMAN@444
sp|Q9UHD8|SEPT9_HUMAN@248			sp|Q7Z6V5|ADAT2_HUMAN@15			sp|O43795|MYO1B_HUMAN@310
sp|Q8NDT2|RB15B_HUMAN@128			sp|Q9UJX6|ANC2_HUMAN@233			sp|Q14694|UBP10_HUMAN@94
sp|Q9UBD5|ORC3_HUMAN@483			sp|Q969Q0|RL36L_HUMAN@77			sp|O75521|ECI2_HUMAN@77
sp|Q02543|RL18A_HUMAN@16			sp|Q9NYZ3|GTSE1_HUMAN@217			sp|Q9NYP9|MS18A_HUMAN@231
sp|Q9NZQ3|SPN90_HUMAN@376			sp|Q9NXV2|KCTD5_HUMAN@28			sp|Q8N0U8|VKORL_HUMAN@50
sp|Q9Y3P9|RBGP1_HUMAN@250			sp|Q9P219|DAPLE_HUMAN@1871			sp|Q9UJF2|NGAP_HUMAN@460
sp|Q96QE3|ATAD5_HUMAN@1529			sp|Q08378|GOGA3_HUMAN@45			sp|Q13009|TIAM1_HUMAN@1006
sp|Q7L014|DDX46_HUMAN@646			sp|Q9C0C9|UBE2O_HUMAN@375			sp|Q8NEZ3|WDR19_HUMAN@357
sp|Q8N5W9|RFLB_HUMAN@81			sp|Q7Z434|MAVS_HUMAN@46			sp|Q92574|TSC1_HUMAN@259
sp|O75132|ZBED4_HUMAN@326			sp|Q8N1F7|NUP93_HUMAN@522			sp|O60551|NMT2_HUMAN@104
sp|Q8N5I9|NOPC1_HUMAN@13			sp|P62249|RS16_HUMAN@25			sp|Q9NQR4|NIT2_HUMAN@97
sp|Q13219|PAPP1_HUMAN@713			sp|Q9UL25|RAB21_HUMAN@29			sp|P03255|E1A_ADE05@284
sp|P55060|XPO2_HUMAN@842			sp|Q9BZF9|UACA_HUMAN@994			sp|Q5T3U5|MRP7_HUMAN@1404
sp|Q9NT62|ATG3_HUMAN@182			sp|P49591|SYSC_HUMAN@300			sp|Q9Y6D6|BIG1_HUMAN@1685
sp|Q14974|IMB1_HUMAN@765			sp|P48643|TCPE_HUMAN@253			sp|P00966|ASSY_HUMAN@132
sp|O15235|RT12_HUMAN@93			sp|P38646|GRP75_HUMAN@608			sp|P34949|MPI_HUMAN@11
sp|Q9H3U1|UN45A_HUMAN@118			sp|Q9P2R3|ANFY1_HUMAN@460			sp|P78345|RPP38_HUMAN@80
sp|Q9H840|GEMI7_HUMAN@44			sp|Q14690|RRP5_HUMAN@535			sp|Q9UGJ1|GCP4_HUMAN@151
sp|Q9H845|ACAD9_HUMAN@327			sp|Q5H9F3|BCORL_HUMAN@797			sp|Q5T7W7|TSTD2_HUMAN@16
sp|Q9ULH1|ASAP1_HUMAN@248			sp|Q15853|USF2_HUMAN@265			sp|Q01804|OTUD4_HUMAN@489
sp|Q14690|RRP5_HUMAN@333			sp|Q9NYH9|UTP6_HUMAN@524			sp|O75909|CCNK_HUMAN@23
sp|P46013|KI67_HUMAN@824			sp|P53370|NUDT6_HUMAN@44			sp|Q9Y6E0|STK24_HUMAN@394
sp|Q99741|CDC6_HUMAN@394			sp|Q96J01|THOC3_HUMAN@65			sp|P78356|PI42B_HUMAN@30
sp|P16615|AT2A2_HUMAN@875			sp|P08237|PFKAM_HUMAN@631			sp|P27708|PYR1_HUMAN@736
sp|Q96J01|THOC3_HUMAN@25			sp|Q9Y263|PLAP_HUMAN@631			sp|Q96GP6|SREC2_HUMAN@340
sp|P49321|NASP_HUMAN@254			sp|Q5FBB7|SGO1_HUMAN@478			sp|O75691|UTP20_HUMAN@75
sp|P12532|KCRU_HUMAN@89			sp|P11172|UMPS_HUMAN@304			sp|O75190|DNJB6_HUMAN@275
sp|Q9H582|ZN644_HUMAN@1206			sp|Q9BVI4|NOC4L_HUMAN@509			sp|Q6PGN9|PSRC1_HUMAN@178
sp|Q9Y679|AUP1_HUMAN@70			sp|O15040|TCPR2_HUMAN@282			sp|P28066|PSA5_HUMAN@165
sp|P19623|SPEE_HUMAN@123			sp|Q8IWC1|MA7D3_HUMAN@494			sp|Q86U86|PB1_HUMAN@1233
sp|Q5SRE5|NU188_HUMAN@1283			sp|Q9Y496|KIF3A_HUMAN@621			sp|Q8TBN0|R3GEF_HUMAN@204
sp|O75521|ECI2_HUMAN@282			sp|P29590|PML_HUMAN@484			sp|Q9Y512|SAM50_HUMAN@457
sp|O75475|PSIP1_HUMAN@204			sp|P43490|NAMPT_HUMAN@39			sp|P51825|AFF1_HUMAN@151
sp|Q9Y6J9|TAF6L_HUMAN@122			sp|P61978|HNRPK_HUMAN@145			sp|Q7Z4L5|TT21B_HUMAN@937
sp|Q7KZF4|SND1_HUMAN@96			sp|Q8NCC3|PAG15_HUMAN@355			sp|P09936|UCHL1_HUMAN@220
sp|Q8WYQ5|DGCR8_HUMAN@128			sp|Q5SNT2|TM201_HUMAN@124			sp|Q9NZ32|ARP10_HUMAN@37
sp|Q8NB90|AFG2A_HUMAN@27			sp|Q9BY32|ITPA_HUMAN@33			sp|Q15047|SETB1_HUMAN@92
sp|Q6P2E9|EDC4_HUMAN@976			sp|P14618|KPYM_HUMAN@424			sp|Q08752|PPID_HUMAN@282
sp|P61081|UBC12_HUMAN@65			sp|Q9C030|TRIM6_HUMAN@335			sp|Q14966|ZN638_HUMAN@1279
sp|P13861|KAP2_HUMAN@359			sp|Q92616|GCN1_HUMAN@1362			sp|Q8JUX5|POLS_CHIKS@742
sp|O75792|RNH2A_HUMAN@29			sp|Q03111|ENL_HUMAN@479			sp|A0A3B3IRV3|MCTS2_HUMAN@113
sp|Q86VI3|IQGA3_HUMAN@35			sp|A1L0T0|HACL2_HUMAN@568			sp|Q9BVA0|KTNB1_HUMAN@579
sp|Q9NXW9|ALKB4_HUMAN@267			sp|Q6QNY0|BL1S3_HUMAN@180			sp|Q15276|RABE1_HUMAN@718
sp|P12814|ACTN1_HUMAN@41			sp|Q5SWX8|ODR4_HUMAN@77			sp|P17029|ZKSC1_HUMAN@63
sp|P13010|XRCC5_HUMAN@493			sp|Q9BRB3|PIGQ_HUMAN@247			sp|O96011|PX11B_HUMAN@85
sp|P12236|ADT3_HUMAN@57			sp|Q14353|GAMT_HUMAN@91			sp|O60318|GANP_HUMAN@439
sp|Q96BY7|ATG2B_HUMAN@243			sp|Q96EK4|THA11_HUMAN@48			sp|Q9UBB9|TFP11_HUMAN@383
sp|P49588|SYAC_HUMAN@671			sp|Q9H0L4|CSTFT_HUMAN@150			sp|Q14185|DOCK1_HUMAN@1224
sp|Q9UKU7|ACAD8_HUMAN@251			sp|Q9NR46|SHLB2_HUMAN@252			sp|Q5T4D3|TMTC4_HUMAN@478
sp|Q9UPV9|TRAK1_HUMAN@713			sp|O60216|RAD21_HUMAN@585			sp|P17655|CAN2_HUMAN@240
sp|Q93008|USP9X_HUMAN@831			sp|P42356|PI4KA_HUMAN@246			sp|Q9Y4B4|ARIP4_HUMAN@1143
sp|P35520|CBS_HUMAN@15			sp|Q6ZW49|PAXI1_HUMAN@136			sp|Q12830|BPTF_HUMAN@940
sp|Q92618|ZN516_HUMAN@1016			sp|Q9UQR0|SCML2_HUMAN@350			sp|Q96T23|RSF1_HUMAN@650
sp|O43772|MCAT_HUMAN@136			sp|P49327|FAS_HUMAN@1548			sp|Q9NWT1|PK1IP_HUMAN@288
sp|Q96EZ8|MCRS1_HUMAN@421			sp|P55039|DRG2_HUMAN@319			sp|O95373|IPO7_HUMAN@757
sp|Q49AR2|CE022_HUMAN@195			sp|Q8N556|AFAP1_HUMAN@713			sp|O94905|ERLN2_HUMAN@262
sp|P07858|CATB_HUMAN@211			sp|P83436|COG7_HUMAN@505			sp|Q8WWI1|LMO7_HUMAN@261
sp|O15020|SPTN2_HUMAN@1140			sp|Q14676|MDC1_HUMAN@1742			sp|P55263|ADK_HUMAN@106
sp|P41252|SYIC_HUMAN@185			sp|Q71F23|CENPU_HUMAN@38			sp|P38398|BRCA1_HUMAN@805
sp|Q96MH2|HEXI2_HUMAN@80			sp|P49792|RBP2_HUMAN@3040			sp|O94973|AP2A2_HUMAN@532
sp|Q92974|ARHG2_HUMAN@342			sp|Q9H6T3|RPAP3_HUMAN@519			sp|Q5T4S7|UBR4_HUMAN@3392
sp|P29992|GNA11_HUMAN@144			sp|Q13427|PPIG_HUMAN@310			sp|O14646|CHD1_HUMAN@502
sp|O60287|NPA1P_HUMAN@169			sp|Q86YR5|GPSM1_HUMAN@497			sp|Q8NFY9|KBTB8_HUMAN@181
sp|Q6IQ22|RAB12_HUMAN@183			sp|O00471|EXOC5_HUMAN@194			sp|O76064|RNF8_HUMAN@181
sp|Q13882|PTK6_HUMAN@82			sp|P45973|CBX5_HUMAN@133			sp|Q9H6Y2|WDR55_HUMAN@306
sp|Q96AC1|FERM2_HUMAN@520			sp|P98194|AT2C1_HUMAN@669			sp|P49810|PSN2_HUMAN@65
sp|Q9UQ35|SRRM2_HUMAN@891			sp|Q13895|BYST_HUMAN@381			sp|Q6PKC3|TXD11_HUMAN@815
sp|O43264|ZW10_HUMAN@650			sp|Q02880|TOP2B_HUMAN@204			sp|P78527|PRKDC_HUMAN@3347
sp|Q9BVP2|GNL3_HUMAN@234			sp|P46939|UTRN_HUMAN@2986			sp|O15027|SC16A_HUMAN@46
sp|Q9HAS0|NJMU_HUMAN@153			sp|Q8N1G1|REXO1_HUMAN@389			sp|P31930|QCR1_HUMAN@154
sp|P62195|PRS8_HUMAN@209			sp|Q9UBW7|ZMYM2_HUMAN@1268			sp|Q15386|UBE3C_HUMAN@1051
sp|Q16531|DDB1_HUMAN@378			sp|Q14204|DYHC1_HUMAN@4216			sp|Q3SY69|AL1L2_HUMAN@389
sp|P31930|QCR1_HUMAN@380			sp|Q8IVS2|FABD_HUMAN@62			sp|O95214|LERL1_HUMAN@66
sp|O75376|NCOR1_HUMAN@994			sp|Q8TDD5|MCLN3_HUMAN@528			sp|Q8NEZ3|WDR19_HUMAN@979
sp|Q9P253|VPS18_HUMAN@421			sp|Q15542|TAF5_HUMAN@632			sp|P42356|PI4KA_HUMAN@19
sp|Q96T88|UHRF1_HUMAN@410			sp|Q13418|ILK_HUMAN@346			sp|O43795|MYO1B_HUMAN@103
sp|Q9NZL9|MAT2B_HUMAN@58			sp|P34932|HSP74_HUMAN@167			sp|Q6DT37|MRCKG_HUMAN@115
sp|Q9NXE4|NSMA3_HUMAN@164			sp|Q9BXP5|SRRT_HUMAN@479			sp|Q13363|CTBP1_HUMAN@54
sp|Q9BW83|IFT27_HUMAN@8			sp|O75165|DJC13_HUMAN@261			sp|Q5VWN6|TASO2_HUMAN@122
sp|Q9H3U1|UN45A_HUMAN@395			sp|Q8NBF2|NHLC2_HUMAN@609			sp|P51812|KS6A3_HUMAN@579
sp|O75521|ECI2_HUMAN@380			sp|O95239|KIF4A_HUMAN@443			sp|Q49A88|CCD14_HUMAN@313
sp|O95295|SNAPN_HUMAN@66			sp|Q9BSJ8|ESYT1_HUMAN@522			sp|P62195|PRS8_HUMAN@112
sp|P49116|NR2C2_HUMAN@414			sp|Q5VT52|RPRD2_HUMAN@222			sp|Q6PGP7|SKI3_HUMAN@329
sp|Q86UK7|ZN598_HUMAN@835			sp|P08865|RSSA_HUMAN@163			sp|Q8N4T4|ARG39_HUMAN@10
sp|Q7Z6V5|ADAT2_HUMAN@15			sp|Q96RG2|PASK_HUMAN@89			sp|Q96SB4|SRPK1_HUMAN@356
sp|Q969Q0|RL36L_HUMAN@77			sp|Q9Y2I7|FYV1_HUMAN@1663			sp|O60941|DTNB_HUMAN@248
sp|O15234|CASC3_HUMAN@36			sp|Q15369|ELOC_HUMAN@11			sp|Q9H1A4|APC1_HUMAN@867
sp|O75643|U520_HUMAN@1592			sp|P62280|RS11_HUMAN@131			sp|Q8WUA4|TF3C2_HUMAN@608
sp|Q9NXV2|KCTD5_HUMAN@28			sp|O00548|DLL1_HUMAN@696			sp|Q92538|GBF1_HUMAN@1431
sp|Q9P219|DAPLE_HUMAN@1871			sp|Q9BQ69|MACD1_HUMAN@186			sp|P21953|ODBB_HUMAN@299
sp|Q08378|GOGA3_HUMAN@45			sp|Q9C0B7|TNG6_HUMAN@305			sp|O75486|SUPT3_HUMAN@186
sp|Q6ZSZ5|ARHGI_HUMAN@887			sp|P12277|KCRB_HUMAN@254			sp|P52789|HXK2_HUMAN@823
sp|Q9C0C9|UBE2O_HUMAN@375			sp|O94906|PRP6_HUMAN@698			sp|Q96KG9|SCYL1_HUMAN@309
sp|Q7Z434|MAVS_HUMAN@46			sp|Q9H410|DSN1_HUMAN@65			sp|Q96KG9|SCYL1_HUMAN@261
sp|Q8N1F7|NUP93_HUMAN@522			sp|P14923|PLAK_HUMAN@341			sp|Q92786|PROX1_HUMAN@659
sp|Q9Y4C1|KDM3A_HUMAN@364			sp|P78559|MAP1A_HUMAN@2191			sp|Q8N3C0|ASCC3_HUMAN@1535
sp|P62249|RS16_HUMAN@25			sp|P51553|IDH3G_HUMAN@148			sp|Q8NCD3|HJURP_HUMAN@646
sp|Q9UL25|RAB21_HUMAN@29			sp|P55209|NP1L1_HUMAN@88			sp|Q9ULJ7|ANR50_HUMAN@36
sp|P49591|SYSC_HUMAN@300			sp|Q92844|TANK_HUMAN@265			sp|P60891|PRPS1_HUMAN@41
sp|Q5SYE7|NHSL1_HUMAN@1471			sp|P50897|PPT1_HUMAN@128			sp|Q5W0B1|OBI1_HUMAN@432
sp|P48643|TCPE_HUMAN@253			sp|Q6UXN9|WDR82_HUMAN@287			sp|P53667|LIMK1_HUMAN@349
sp|Q9BZF9|UACA_HUMAN@994			sp|Q12797|ASPH_HUMAN@648			sp|Q96LJ7|DHRS1_HUMAN@256
sp|Q9H2Y7|ZN106_HUMAN@1661			sp|Q7Z3C6|ATG9A_HUMAN@197			sp|Q9NZT2|OGFR_HUMAN@443
sp|P38646|GRP75_HUMAN@608			sp|O60216|RAD21_HUMAN@78			sp|P30837|AL1B1_HUMAN@386
sp|Q9P2R3|ANFY1_HUMAN@460			sp|Q96T88|UHRF1_HUMAN@403			sp|Q8IXW5|RPAP2_HUMAN@358
sp|Q14690|RRP5_HUMAN@535			sp|P07814|SYEP_HUMAN@1377			sp|Q8NHP6|MSPD2_HUMAN@471
sp|Q5H9F3|BCORL_HUMAN@797			sp|Q6PI48|SYDM_HUMAN@108			sp|O00410|IPO5_HUMAN@733
sp|Q9Y305|ACOT9_HUMAN@299			sp|Q13557|KCC2D_HUMAN@273			sp|Q969H6|POP5_HUMAN@11
sp|Q15853|USF2_HUMAN@265			sp|P50395|GDIB_HUMAN@414			sp|O95373|IPO7_HUMAN@736
sp|Q9NYH9|UTP6_HUMAN@524			sp|Q9NWC5|TM45A_HUMAN@255			sp|Q08999|RBL2_HUMAN@415
sp|P53370|NUDT6_HUMAN@44			sp|O15068|MCF2L_HUMAN@580			sp|Q13404|UB2V1_HUMAN@144
sp|P07384|CAN1_HUMAN@351			sp|Q9Y6Y0|NS1BP_HUMAN@274			sp|Q96AY4|TTC28_HUMAN@502
sp|Q96J01|THOC3_HUMAN@65			sp|P42224|STAT1_HUMAN@155			sp|Q6ZN04|MEX3B_HUMAN@438
sp|P08237|PFKAM_HUMAN@631			sp|P09543|CN37_HUMAN@158			sp|Q8NDN9|RCBT1_HUMAN@72
sp|Q9H0H5|RGAP1_HUMAN@389			sp|Q9C073|F117A_HUMAN@138			sp|Q6P179|ERAP2_HUMAN@460
sp|Q9Y5T5|UBP16_HUMAN@509			sp|Q96ST2|IWS1_HUMAN@749			sp|Q659A1|ICE2_HUMAN@307
sp|Q9Y263|PLAP_HUMAN@631			sp|O00623|PEX12_HUMAN@339			sp|P48200|IREB2_HUMAN@174
sp|Q5FBB7|SGO1_HUMAN@478			sp|Q9GZP4|PITH1_HUMAN@187			sp|Q9NQH7|XPP3_HUMAN@492
sp|Q15061|WDR43_HUMAN@307			sp|Q9NTJ5|SAC1_HUMAN@445			sp|P00558|PGK1_HUMAN@108
sp|P11172|UMPS_HUMAN@304			sp|Q99832|TCPH_HUMAN@345			sp|Q14204|DYHC1_HUMAN@4121
sp|Q96DY7|MTBP_HUMAN@347			sp|Q96EY7|PTCD3_HUMAN@260			sp|P35520|CBS_HUMAN@52
sp|Q8WYA0|IFT81_HUMAN@535			sp|Q00610|CLH1_HUMAN@934			sp|Q9H4B0|OSGL1_HUMAN@249
sp|O14524|NEMP1_HUMAN@434			sp|Q9NR09|BIRC6_HUMAN@463			sp|Q9BQ67|GRWD1_HUMAN@66
sp|O15040|TCPR2_HUMAN@282			sp|Q9NVI1|FANCI_HUMAN@56			sp|O95747|OXSR1_HUMAN@191
sp|Q9P2Y5|UVRAG_HUMAN@112			sp|P78347|GTF2I_HUMAN@215			sp|P40926|MDHM_HUMAN@212
sp|Q12830|BPTF_HUMAN@882			sp|Q9NRY4|RHG35_HUMAN@814			sp|Q9P260|RELCH_HUMAN@917
sp|Q8IWC1|MA7D3_HUMAN@494			sp|Q16513|PKN2_HUMAN@118			sp|Q9NNW5|WDR6_HUMAN@341
sp|Q9Y496|KIF3A_HUMAN@621			sp|Q99707|METH_HUMAN@812			sp|Q9UPY3|DICER_HUMAN@1122
sp|P29590|PML_HUMAN@484			sp|Q8N4Q0|PTGR3_HUMAN@55			sp|P78527|PRKDC_HUMAN@90
sp|P43490|NAMPT_HUMAN@39			sp|Q9ULP9|TBC24_HUMAN@29			sp|Q49AM3|TTC31_HUMAN@429
sp|Q9Y263|PLAP_HUMAN@12			sp|Q8IUX1|T126B_HUMAN@140			sp|Q8NFC6|BD1L1_HUMAN@2438
sp|P61978|HNRPK_HUMAN@145			sp|P03243|E1B55_ADE05@366			sp|Q562E7|WDR81_HUMAN@1894
sp|Q8NCC3|PAG15_HUMAN@355			sp|Q5VYS8|TUT7_HUMAN@417			sp|P35579|MYH9_HUMAN@931
sp|Q9BTC0|DIDO1_HUMAN@1665			sp|Q86Y97|KMT5C_HUMAN@111			sp|Q63HN8|RN213_HUMAN@4348
sp|Q9BY32|ITPA_HUMAN@33			sp|Q9ULA0|DNPEP_HUMAN@423			sp|Q6P2Q9|PRP8_HUMAN@1896
sp|P14618|KPYM_HUMAN@424			sp|Q7Z4Q2|HEAT3_HUMAN@446			sp|Q9H0E9|BRD8_HUMAN@64
sp|Q96SZ6|CK5P1_HUMAN@538			sp|O76094|SRP72_HUMAN@349			sp|Q2M296|MTHSD_HUMAN@267
sp|P26358|DNMT1_HUMAN@1001			sp|P04843|RPN1_HUMAN@477			sp|Q9ULJ7|ANR50_HUMAN@122
sp|O15304|SIVA_HUMAN@6			sp|Q9BV38|WDR18_HUMAN@384			sp|Q93008|USP9X_HUMAN@2239
sp|Q92616|GCN1_HUMAN@1362			sp|Q6P996|PDXD1_HUMAN@126			sp|P00558|PGK1_HUMAN@316
sp|Q03111|ENL_HUMAN@479			sp|Q9P2B7|CFA97_HUMAN@104			sp|P27708|PYR1_HUMAN@1085
sp|A1L0T0|HACL2_HUMAN@568			sp|Q9H9S3|S61A2_HUMAN@13			sp|Q9H147|TDIF1_HUMAN@192
sp|Q6QNY0|BL1S3_HUMAN@180			sp|Q96C36|P5CR2_HUMAN@225			sp|Q00613|HSF1_HUMAN@103
sp|Q9BRB3|PIGQ_HUMAN@247			sp|O75439|MPPB_HUMAN@265			sp|P19367|HXK1_HUMAN@886
sp|P39880|CUX1_HUMAN@962			sp|Q92947|GCDH_HUMAN@176			sp|Q9H0N5|PHS2_HUMAN@109
sp|Q14353|GAMT_HUMAN@91			sp|P49327|FAS_HUMAN@2273			sp|O14617|AP3D1_HUMAN@348
sp|Q96EK4|THA11_HUMAN@48			sp|Q12874|SF3A3_HUMAN@103			sp|O95817|BAG3_HUMAN@373
sp|Q9Y4I1|MYO5A_HUMAN@684			sp|Q9NXR7|BABA2_HUMAN@34			sp|Q96QF0|RAB3I_HUMAN@389
sp|Q9H0L4|CSTFT_HUMAN@150			sp|P46087|NOP2_HUMAN@487			sp|Q92990|GLMN_HUMAN@218
sp|O60216|RAD21_HUMAN@585			sp|O00411|RPOM_HUMAN@94			sp|Q9UBF8|PI4KB_HUMAN@435
sp|O00743|PPP6_HUMAN@262			sp|Q12765|SCRN1_HUMAN@324			sp|Q5T8P6|RBM26_HUMAN@25
sp|P42356|PI4KA_HUMAN@246			sp|P63151|2ABA_HUMAN@398			sp|Q14008|CKAP5_HUMAN@1500
sp|Q7Z3U7|MON2_HUMAN@373			sp|Q8NFP9|NBEA_HUMAN@369			sp|P63208|SKP1_HUMAN@120
sp|Q6ZW49|PAXI1_HUMAN@136			sp|P78312|F193A_HUMAN@135			sp|P57678|GEMI4_HUMAN@720
sp|O14523|C2C2L_HUMAN@385			sp|Q9H9P8|L2HDH_HUMAN@272			sp|P35580|MYH10_HUMAN@164
sp|Q9UQR0|SCML2_HUMAN@350			sp|Q9C0C4|SEM4C_HUMAN@723			sp|Q16512|PKN1_HUMAN@602
sp|P49327|FAS_HUMAN@1548			sp|Q9UQB9|AURKC_HUMAN@200			sp|Q5VUA4|ZN318_HUMAN@242
sp|P55039|DRG2_HUMAN@319			sp|Q9Y6A5|TACC3_HUMAN@20			sp|Q9UPU5|UBP24_HUMAN@2160
sp|Q8N556|AFAP1_HUMAN@713			sp|A0A5B0|TVB14_HUMAN@12			sp|Q9H1P3|OSBL2_HUMAN@122
sp|P83436|COG7_HUMAN@505			sp|O43795|MYO1B_HUMAN@641			sp|Q8IZD4|DCP1B_HUMAN@291
sp|Q96EK5|KBP_HUMAN@272			sp|Q96LD4|TRI47_HUMAN@347			sp|P48382|RFX5_HUMAN@107
sp|Q14676|MDC1_HUMAN@1742			sp|Q8N0W3|FCSK_HUMAN@582			sp|O75439|MPPB_HUMAN@62
sp|Q71F23|CENPU_HUMAN@38			sp|P17655|CAN2_HUMAN@640			sp|Q9BRJ7|TIRR_HUMAN@88
sp|Q13427|PPIG_HUMAN@310			sp|Q9H9F9|ARP5_HUMAN@48			sp|Q96JX3|SRAC1_HUMAN@627
sp|Q9H6T3|RPAP3_HUMAN@519			sp|Q9H4B6|SAV1_HUMAN@51			sp|O00213|APBB1_HUMAN@499
sp|Q86YR5|GPSM1_HUMAN@497			sp|Q9UBB6|NCDN_HUMAN@98			sp|P54198|HIRA_HUMAN@518
sp|O00471|EXOC5_HUMAN@194			sp|P24468|COT2_HUMAN@343			sp|Q9BX10|GTPB2_HUMAN@321
sp|P45973|CBX5_HUMAN@133			sp|Q14149|MORC3_HUMAN@632			sp|Q96II8|LRCH3_HUMAN@236
sp|P98194|AT2C1_HUMAN@669			sp|Q68EM7|RHG17_HUMAN@305			sp|O15355|PPM1G_HUMAN@351
sp|Q02880|TOP2B_HUMAN@204			sp|O43707|ACTN4_HUMAN@499			sp|P11717|MPRI_HUMAN@1282
sp|P46939|UTRN_HUMAN@2986			sp|O00764|PDXK_HUMAN@273			sp|Q9UEY8|ADDG_HUMAN@286
sp|Q9Y617|SERC_HUMAN@224			sp|P51452|DUS3_HUMAN@171			sp|Q7LBC6|KDM3B_HUMAN@1470
sp|Q14204|DYHC1_HUMAN@4216			sp|Q562E7|WDR81_HUMAN@765			sp|B4E2M5|ANR66_HUMAN@125
sp|Q5JU69|TOR2A_HUMAN@271			sp|Q9NRL3|STRN4_HUMAN@337			sp|Q6P587|FAHD1_HUMAN@129
sp|Q13418|ILK_HUMAN@346			sp|Q9HAV4|XPO5_HUMAN@10			sp|Q8IWZ3|ANKH1_HUMAN@181
sp|P34932|HSP74_HUMAN@167			sp|P52756|RBM5_HUMAN@766			sp|Q9UJV9|DDX41_HUMAN@568
sp|Q02218|ODO1_HUMAN@395			sp|P30044|PRDX5_HUMAN@100			sp|P20338|RAB4A_HUMAN@28
sp|O75165|DJC13_HUMAN@261			sp|O75165|DJC13_HUMAN@2110			sp|O95602|RPA1_HUMAN@1332
sp|Q8NBF2|NHLC2_HUMAN@609			sp|Q00839|HNRPU_HUMAN@391			sp|P40926|MDHM_HUMAN@285
sp|Q9ULM3|YETS2_HUMAN@1232			sp|Q7Z5J4|RAI1_HUMAN@1745			sp|O00750|P3C2B_HUMAN@1373
sp|P49418|AMPH_HUMAN@102			sp|O75376|NCOR1_HUMAN@2322			sp|P49753|ACOT2_HUMAN@183
sp|O95239|KIF4A_HUMAN@443			sp|P62244|RS15A_HUMAN@30			sp|Q08J23|NSUN2_HUMAN@599
sp|Q9BSJ8|ESYT1_HUMAN@522			sp|Q96CP2|FWCH2_HUMAN@64			sp|Q9Y584|TIM22_HUMAN@69
sp|Q5VT52|RPRD2_HUMAN@222			sp|Q02543|RL18A_HUMAN@22			sp|Q13045|FLII_HUMAN@576
sp|P08865|RSSA_HUMAN@163			sp|O15037|KHNYN_HUMAN@221			sp|O00422|SAP18_HUMAN@26
sp|Q9Y2I7|FYV1_HUMAN@1663			sp|Q13257|MD2L1_HUMAN@106			sp|O00255|MEN1_HUMAN@421
sp|Q15369|ELOC_HUMAN@11			sp|P46013|KI67_HUMAN@1843			sp|P51608|MECP2_HUMAN@413
sp|P82673|RT35_HUMAN@130			sp|P62877|RBX1_HUMAN@94			sp|P62333|PRS10_HUMAN@228
sp|Q05823|RN5A_HUMAN@301			sp|P02545|LMNA_HUMAN@591			sp|Q5IS35|TPC_MACFA@268
sp|Q8N8E3|CE112_HUMAN@514			sp|P55201|BRPF1_HUMAN@852			sp|Q92598|HS105_HUMAN@516
sp|P62280|RS11_HUMAN@131			sp|O60343|TBCD4_HUMAN@388			sp|P53618|COPB_HUMAN@390
sp|O95478|NSA2_HUMAN@253			sp|Q6PL24|TMED8_HUMAN@61			sp|Q6W2J9|BCOR_HUMAN@1436
sp|Q14146|URB2_HUMAN@478			sp|O14920|IKKB_HUMAN@412			sp|Q96B70|LENG9_HUMAN@219
sp|Q99570|PI3R4_HUMAN@84			sp|Q99961|SH3G1_HUMAN@277			sp|Q8N697|S15A4_HUMAN@37
sp|Q9BQ69|MACD1_HUMAN@186			sp|P50570|DYN2_HUMAN@86			sp|Q14204|DYHC1_HUMAN@2076
sp|Q7Z4R8|CF120_HUMAN@99			sp|P38646|GRP75_HUMAN@366			sp|O14981|BTAF1_HUMAN@371
sp|P12277|KCRB_HUMAN@254			sp|O60318|GANP_HUMAN@981			sp|Q03519|TAP2_HUMAN@571
sp|O94906|PRP6_HUMAN@698			sp|Q68E01|INT3_HUMAN@866			sp|P36776|LONM_HUMAN@909
sp|Q9H410|DSN1_HUMAN@65			sp|O00410|IPO5_HUMAN@110			sp|Q9UNH7|SNX6_HUMAN@398
sp|P14923|PLAK_HUMAN@341			sp|O75145|LIPA3_HUMAN@250			sp|P46459|NSF_HUMAN@250
sp|Q3KRA9|ALKB6_HUMAN@212			sp|Q13155|AIMP2_HUMAN@23			sp|Q9UHC7|MKRN1_HUMAN@186
sp|Q15910|EZH2_HUMAN@260			sp|Q9H944|MED20_HUMAN@5			sp|P51114|FXR1_HUMAN@77
sp|P51553|IDH3G_HUMAN@148			sp|Q7L2E3|DHX30_HUMAN@118			sp|Q9UJM3|ERRFI_HUMAN@378
sp|P55209|NP1L1_HUMAN@88			sp|Q96JB2|COG3_HUMAN@363			sp|Q9H7E9|CH033_HUMAN@50
sp|Q7LBC6|KDM3B_HUMAN@999			sp|P42694|HELZ_HUMAN@863			sp|O94829|IPO13_HUMAN@951
sp|Q9UHB7|AFF4_HUMAN@889			sp|Q9UIQ6|LCAP_HUMAN@305			sp|P13639|EF2_HUMAN@290
sp|Q6UXN9|WDR82_HUMAN@287			sp|Q9HAD4|WDR41_HUMAN@166			sp|Q7L2H7|EIF3M_HUMAN@125
sp|Q8TAQ2|SMRC2_HUMAN@136			sp|P05412|JUN_HUMAN@99			sp|Q14653|IRF3_HUMAN@222
sp|O60216|RAD21_HUMAN@78			sp|Q92499|DDX1_HUMAN@571			sp|Q8N6M0|OTU6B_HUMAN@172
sp|O15037|KHNYN_HUMAN@157			sp|Q5T447|HECD3_HUMAN@744			sp|Q8TDR0|MIPT3_HUMAN@594
sp|Q9Y232|CDYL_HUMAN@543			sp|Q9UET6|TRM7_HUMAN@238			sp|Q9NZJ0|DTL_HUMAN@710
sp|Q13769|THOC5_HUMAN@608			sp|P08134|RHOC_HUMAN@159			sp|Q13111|CAF1A_HUMAN@207
sp|P07814|SYEP_HUMAN@1377			sp|Q9NXG2|THUM1_HUMAN@31			sp|Q9HCG8|CWC22_HUMAN@253
sp|Q6PI48|SYDM_HUMAN@108			sp|O60518|RNBP6_HUMAN@31			sp|Q96QU8|XPO6_HUMAN@282
sp|Q13557|KCC2D_HUMAN@273			sp|O75691|UTP20_HUMAN@1384			sp|Q8IZ83|A16A1_HUMAN@249
sp|P50395|GDIB_HUMAN@414			sp|Q9NPI1|BRD7_HUMAN@367			sp|Q9UQ35|SRRM2_HUMAN@1036
sp|P42224|STAT1_HUMAN@155			sp|Q86XP1|DGKH_HUMAN@516			sp|P21333|FLNA_HUMAN@2199
sp|P09543|CN37_HUMAN@158			sp|Q15022|SUZ12_HUMAN@201			sp|Q12841|FSTL1_HUMAN@84
sp|Q9C073|F117A_HUMAN@138			sp|Q9NQS1|AVEN_HUMAN@251			sp|Q96DE5|APC16_HUMAN@55
sp|Q96ST2|IWS1_HUMAN@749			sp|Q12888|TP53B_HUMAN@772			sp|P19838|NFKB1_HUMAN@925
sp|O00623|PEX12_HUMAN@339			sp|Q9NPG3|UBN1_HUMAN@765			sp|Q9NU19|TB22B_HUMAN@206
sp|Q9GZP4|PITH1_HUMAN@187			sp|P22626|ROA2_HUMAN@50			sp|P60228|EIF3E_HUMAN@350
sp|Q9NTJ5|SAC1_HUMAN@445			sp|Q07954|LRP1_HUMAN@3860			sp|Q9H0A0|NAT10_HUMAN@255
sp|Q99832|TCPH_HUMAN@345			sp|Q5JSZ5|PRC2B_HUMAN@1482			sp|Q96E22|NGBR_HUMAN@208
sp|P61106|RAB14_HUMAN@26			sp|P42166|LAP2A_HUMAN@684			sp|Q8TCB7|METL6_HUMAN@256
sp|Q00610|CLH1_HUMAN@934			sp|O14757|CHK1_HUMAN@408			sp|Q96Q15|SMG1_HUMAN@2738
sp|Q9NR09|BIRC6_HUMAN@463			sp|Q8NG31|KNL1_HUMAN@1301			sp|Q9UPU5|UBP24_HUMAN@1859
sp|Q9NVI1|FANCI_HUMAN@56			sp|Q99758|ABCA3_HUMAN@1494			sp|O60294|TYW4_HUMAN@133
sp|P78347|GTF2I_HUMAN@215			sp|O60547|GMDS_HUMAN@92			sp|P78527|PRKDC_HUMAN@1312
sp|Q9Y6A5|TACC3_HUMAN@749			sp|P54136|SYRC_HUMAN@312			sp|P31153|METK2_HUMAN@56
sp|Q16513|PKN2_HUMAN@118			sp|P17014|ZNF12_HUMAN@537			sp|P35219|CAH8_HUMAN@200
sp|Q99707|METH_HUMAN@812			sp|Q8IUD2|RB6I2_HUMAN@258			sp|Q32NB8|PGPS1_HUMAN@444
sp|P13639|EF2_HUMAN@693			sp|O60518|RNBP6_HUMAN@980			sp|P13798|ACPH_HUMAN@312
sp|Q9ULP9|TBC24_HUMAN@29			sp|P04637|P53_HUMAN@124			sp|P17098|ZNF8_HUMAN@143
sp|Q8IUX1|T126B_HUMAN@140			sp|P41214|EIF2D_HUMAN@133			sp|A6NHR9|SMHD1_HUMAN@1433
sp|P03243|E1B55_ADE05@366			sp|Q13315|ATM_HUMAN@2021			sp|Q01780|EXOSX_HUMAN@307
sp|Q9H582|ZN644_HUMAN@1077			sp|Q96T23|RSF1_HUMAN@584			sp|Q9P2E9|RRBP1_HUMAN@1216
sp|O14980|XPO1_HUMAN@585			sp|O60783|RT14_HUMAN@83			sp|Q8WXH0|SYNE2_HUMAN@5359
sp|Q86Y97|KMT5C_HUMAN@111			sp|Q9NR50|EI2BG_HUMAN@334			sp|P61247|RS3A_HUMAN@111
sp|O60333|KIF1B_HUMAN@66			sp|Q8IWJ2|GCC2_HUMAN@257			sp|O15460|P4HA2_HUMAN@510
sp|Q15043|S39AE_HUMAN@118			sp|Q9BT22|ALG1_HUMAN@317			sp|Q13395|TARB1_HUMAN@202
sp|Q9ULA0|DNPEP_HUMAN@423			sp|Q13813|SPTN1_HUMAN@2233			sp|O14867|BACH1_HUMAN@683
sp|Q7Z4Q2|HEAT3_HUMAN@446			sp|Q15738|NSDHL_HUMAN@132			sp|P17812|PYRG1_HUMAN@491
sp|Q9BVS4|RIOK2_HUMAN@449			sp|Q96P47|AGAP3_HUMAN@721			sp|O14745|NHRF1_HUMAN@206
sp|P11766|ADHX_HUMAN@103			sp|Q9NX74|DUS2L_HUMAN@154			sp|Q15398|DLGP5_HUMAN@129
sp|O76094|SRP72_HUMAN@349			sp|Q96HA1|P121A_HUMAN@613			sp|P38606|VATA_HUMAN@394
sp|P04843|RPN1_HUMAN@477			sp|Q8WYP5|ELYS_HUMAN@1628			sp|Q68DK2|ZFY26_HUMAN@66
sp|Q5M775|CYTSB_HUMAN@578			sp|Q96FJ0|STALP_HUMAN@98			sp|Q9HBM0|VEZA_HUMAN@298
sp|Q9P2B7|CFA97_HUMAN@104			sp|P28340|DPOD1_HUMAN@193			sp|Q13332|PTPRS_HUMAN@1790
sp|Q9H9S3|S61A2_HUMAN@13			sp|O94806|KPCD3_HUMAN@29			sp|Q4J6C6|PPCEL_HUMAN@227
sp|Q96C36|P5CR2_HUMAN@225			sp|O96000|NDUBA_HUMAN@119			sp|P22234|PUR6_HUMAN@185
sp|Q9Y6M5|ZNT1_HUMAN@437			sp|P62241|RS8_HUMAN@100			sp|Q9P2J9|PDP2_HUMAN@345
sp|P33992|MCM5_HUMAN@443			sp|Q01581|HMCS1_HUMAN@406			sp|Q92620|PRP16_HUMAN@582
sp|O75439|MPPB_HUMAN@265			sp|P50748|KNTC1_HUMAN@2099			sp|Q15021|CND1_HUMAN@1249
sp|Q92947|GCDH_HUMAN@176			sp|Q14204|DYHC1_HUMAN@3573			sp|Q9UJ83|HACL1_HUMAN@261
sp|P31327|CPSM_HUMAN@761			sp|O00471|EXOC5_HUMAN@254			sp|Q9BX63|FANCJ_HUMAN@948
sp|P78312|F193A_HUMAN@594			sp|Q8TDP1|RNH2C_HUMAN@34			sp|O15091|MRPP3_HUMAN@367
sp|P49327|FAS_HUMAN@2273			sp|Q2TBE0|C19L2_HUMAN@402			sp|O43390|HNRPR_HUMAN@99
sp|Q12874|SF3A3_HUMAN@103			sp|P30307|MPIP3_HUMAN@42			sp|Q8NF91|SYNE1_HUMAN@8703
sp|Q9NRY5|F1142_HUMAN@388			sp|P49792|RBP2_HUMAN@141			sp|Q6AWC2|WWC2_HUMAN@1061
sp|Q9Y2P8|RCL1_HUMAN@346			sp|P61160|ARP2_HUMAN@11			sp|Q53H96|P5CR3_HUMAN@266
sp|Q9ULE6|PALD_HUMAN@845			sp|Q96AG3|S2546_HUMAN@239			sp|Q6AI12|ANR40_HUMAN@209
sp|Q9NXR7|BABA2_HUMAN@34			sp|Q9NTK5|OLA1_HUMAN@75			sp|Q6ZRI6|CO039_HUMAN@210
sp|P46087|NOP2_HUMAN@487			sp|Q9Y4P8|WIPI2_HUMAN@393			sp|Q13129|RLF_HUMAN@74
sp|O00411|RPOM_HUMAN@94			sp|Q658P3|STEA3_HUMAN@168			sp|P20700|LMNB1_HUMAN@110
sp|Q12765|SCRN1_HUMAN@324			sp|Q9H2U2|IPYR2_HUMAN@274			sp|Q9H1A7|RPB1C_HUMAN@30
sp|P63151|2ABA_HUMAN@398			sp|P49841|GSK3B_HUMAN@218			sp|Q96CW5|GCP3_HUMAN@388
sp|P18858|DNLI1_HUMAN@846			sp|O60508|PRP17_HUMAN@366			sp|Q14204|DYHC1_HUMAN@2712
sp|Q9H9P8|L2HDH_HUMAN@272			sp|Q29RF7|PDS5A_HUMAN@532			sp|A2A3K4|PTPC1_HUMAN@380
sp|Q9C0C4|SEM4C_HUMAN@723			sp|P18031|PTN1_HUMAN@32			sp|Q13423|NNTM_HUMAN@1073
sp|Q9Y6A5|TACC3_HUMAN@20			sp|Q8N5J2|MINY1_HUMAN@94			sp|Q14789|GOGB1_HUMAN@2233
sp|Q96J01|THOC3_HUMAN@326			sp|P53621|COPA_HUMAN@522			sp|Q9P2I0|CPSF2_HUMAN@294
sp|O43795|MYO1B_HUMAN@641			sp|Q14807|KIF22_HUMAN@65			sp|Q9P1Y5|CAMP3_HUMAN@1167
sp|Q96LD4|TRI47_HUMAN@347			sp|Q9UI36|DACH1_HUMAN@243			sp|Q13315|ATM_HUMAN@2323
sp|O95336|6PGL_HUMAN@237			sp|Q9NX14|NDUBB_HUMAN@141			sp|Q14442|PIGH_HUMAN@166
sp|P17655|CAN2_HUMAN@640			sp|P18858|DNLI1_HUMAN@280			sp|Q96ME7|ZN512_HUMAN@430
sp|Q9Y6Q3|ZFP37_HUMAN@180			sp|Q9BQB6|VKOR1_HUMAN@51			sp|P0C7P0|CISD3_HUMAN@109
sp|Q9H9F9|ARP5_HUMAN@48			sp|Q8TEH3|DEN1A_HUMAN@338			sp|Q14674|ESPL1_HUMAN@294
sp|Q9UBB6|NCDN_HUMAN@98			sp|Q8NCN4|RN169_HUMAN@337			sp|Q9UL03|INT6_HUMAN@659
sp|P24468|COT2_HUMAN@343			sp|O75943|RAD17_HUMAN@141			sp|O14979|HNRDL_HUMAN@277
sp|P29322|EPHA8_HUMAN@568			sp|Q13586|STIM1_HUMAN@49			sp|Q6PL18|ATAD2_HUMAN@387
sp|Q14149|MORC3_HUMAN@632			sp|Q1KMD3|HNRL2_HUMAN@308			sp|Q149N8|SHPRH_HUMAN@489
sp|Q68EM7|RHG17_HUMAN@305			sp|O95402|MED26_HUMAN@271			sp|Q02880|TOP2B_HUMAN@321
sp|O43707|ACTN4_HUMAN@499			sp|Q96BK5|PINX1_HUMAN@145			sp|O75369|FLNB_HUMAN@1952
sp|P49588|SYAC_HUMAN@525			sp|Q9H9Q4|NHEJ1_HUMAN@253			sp|P46459|NSF_HUMAN@599
sp|O00764|PDXK_HUMAN@273			sp|Q9NVN8|GNL3L_HUMAN@278			sp|Q14789|GOGB1_HUMAN@1285
sp|Q9H270|VPS11_HUMAN@128			sp|Q8WUG5|S22AH_HUMAN@636			sp|Q6F5E8|CARL2_HUMAN@1339
sp|P51452|DUS3_HUMAN@171			sp|Q9Y5Q9|TF3C3_HUMAN@810			sp|Q9NZJ7|MTCH1_HUMAN@222
sp|Q9NRL3|STRN4_HUMAN@337			sp|Q13111|CAF1A_HUMAN@79			sp|Q13126|MTAP_HUMAN@131
sp|P68366|TBA4A_HUMAN@25			sp|P78316|NOP14_HUMAN@457			sp|Q14789|GOGB1_HUMAN@1811
sp|Q9HAV4|XPO5_HUMAN@10			sp|P58107|EPIPL_HUMAN@4893			sp|O75410|TACC1_HUMAN@114
sp|P52756|RBM5_HUMAN@766			sp|Q8IX18|DHX40_HUMAN@225			sp|Q96RT8|GCP5_HUMAN@670
sp|P30044|PRDX5_HUMAN@100			sp|Q9UGP4|LIMD1_HUMAN@148			sp|O43143|DHX15_HUMAN@750
sp|Q00839|HNRPU_HUMAN@391			sp|Q8NI27|THOC2_HUMAN@804			sp|Q14012|KCC1A_HUMAN@267
sp|O75165|DJC13_HUMAN@2110			sp|Q86XA9|HTR5A_HUMAN@868			sp|Q6NUS6|TECT3_HUMAN@239
sp|Q7Z5J4|RAI1_HUMAN@1745			sp|O14867|BACH1_HUMAN@224			sp|O15155|BET1_HUMAN@28
sp|O75376|NCOR1_HUMAN@2322			sp|O75691|UTP20_HUMAN@1794			sp|P55196|AFAD_HUMAN@841
sp|P62244|RS15A_HUMAN@30			sp|Q9UKG1|DP13A_HUMAN@616			sp|P49589|SYCC_HUMAN@506
sp|Q96CP2|FWCH2_HUMAN@64			sp|Q8N9F7|GDPD1_HUMAN@107			sp|P18858|DNLI1_HUMAN@434
sp|Q02543|RL18A_HUMAN@22			sp|Q9BTE3|MCMBP_HUMAN@249			sp|Q8NHU6|TDRD7_HUMAN@333
sp|O15037|KHNYN_HUMAN@221			sp|O43747|AP1G1_HUMAN@539			sp|P49720|PSB3_HUMAN@19
sp|Q96FZ7|CHMP6_HUMAN@110			sp|Q9H079|KTBL1_HUMAN@106			sp|Q9UBH6|S53A1_HUMAN@188
sp|Q13257|MD2L1_HUMAN@106			sp|Q6P0N0|M18BP_HUMAN@206			sp|Q96NT5|PCFT_HUMAN@21
sp|P46013|KI67_HUMAN@1843			sp|Q12802|AKP13_HUMAN@2142			sp|P55084|ECHB_HUMAN@28
sp|Q7L0Q8|RHOU_HUMAN@203			sp|O95456|PSMG1_HUMAN@157			sp|P13196|HEM1_HUMAN@263
sp|Q969Y2|GTPB3_HUMAN@46			sp|Q7Z4Q2|HEAT3_HUMAN@134			sp|Q92558|WASF1_HUMAN@296
sp|P62877|RBX1_HUMAN@94			sp|P12532|KCRU_HUMAN@316			sp|Q5T7B8|KIF24_HUMAN@1274
sp|P02545|LMNA_HUMAN@591			sp|Q96C12|ARMC5_HUMAN@579			sp|P08240|SRPRA_HUMAN@363
sp|P55201|BRPF1_HUMAN@852			sp|O00244|ATOX1_HUMAN@41			sp|P78549|NTH_HUMAN@118
sp|Q5SNT2|TM201_HUMAN@626			sp|Q9UHB7|AFF4_HUMAN@315			sp|Q8TEM1|PO210_HUMAN@1611
sp|O00567|NOP56_HUMAN@112			sp|Q9BU23|LMF2_HUMAN@696			sp|O15226|NKRF_HUMAN@242
sp|O60343|TBCD4_HUMAN@388			sp|Q53H82|LACB2_HUMAN@58			sp|P07814|SYEP_HUMAN@92
sp|O14920|IKKB_HUMAN@412			sp|Q5UIP0|RIF1_HUMAN@1865			sp|P06756|ITAV_HUMAN@97
sp|Q99961|SH3G1_HUMAN@277			sp|P23193|TCEA1_HUMAN@212			sp|Q8TDN6|BRX1_HUMAN@52
sp|P50570|DYN2_HUMAN@86			sp|Q96N67|DOCK7_HUMAN@358			sp|Q9UIA9|XPO7_HUMAN@525
sp|P38646|GRP75_HUMAN@366			sp|Q29RF7|PDS5A_HUMAN@589			sp|Q9UKV3|ACINU_HUMAN@1083
sp|Q68E01|INT3_HUMAN@866			sp|O60292|SI1L3_HUMAN@407			sp|O15068|MCF2L_HUMAN@951
sp|O00410|IPO5_HUMAN@110			sp|P55196|AFAD_HUMAN@960			sp|Q13616|CUL1_HUMAN@170
sp|O75145|LIPA3_HUMAN@250			sp|O00471|EXOC5_HUMAN@111			sp|Q9P2D3|HTR5B_HUMAN@1262
sp|Q13155|AIMP2_HUMAN@23			sp|O95202|LETM1_HUMAN@379			sp|Q9HBE1|PATZ1_HUMAN@388
sp|Q9H944|MED20_HUMAN@5			sp|Q8IY18|SMC5_HUMAN@881			sp|Q9H974|QTRT2_HUMAN@324
sp|Q07955|SRSF1_HUMAN@16			sp|P31939|PUR9_HUMAN@325			sp|Q92990|GLMN_HUMAN@537
sp|Q9H0C8|ILKAP_HUMAN@367			sp|Q7L2E3|DHX30_HUMAN@461			sp|Q86TW2|ADCK1_HUMAN@481
sp|Q96JB2|COG3_HUMAN@363			sp|Q8WZ74|CTTB2_HUMAN@759			sp|Q9P1Y6|PHRF1_HUMAN@658
sp|Q5T9A4|ATD3B_HUMAN@557			sp|Q86VP6|CAND1_HUMAN@71			sp|Q6ZN17|LN28B_HUMAN@201
sp|P05412|JUN_HUMAN@99			sp|Q00653|NFKB2_HUMAN@738			sp|Q8IX04|UEVLD_HUMAN@319
sp|Q92499|DDX1_HUMAN@571			sp|Q9NX58|LYAR_HUMAN@25			sp|B2RTY4|MYO9A_HUMAN@152
sp|Q9UET6|TRM7_HUMAN@238			sp|Q9NVH2|INT7_HUMAN@42			sp|Q9H649|NSUN3_HUMAN@214
sp|P08134|RHOC_HUMAN@159			sp|Q9BTW9|TBCD_HUMAN@826			sp|P07437|TBB5_HUMAN@129
sp|Q9NXG2|THUM1_HUMAN@31			sp|Q14669|TRIPC_HUMAN@35			sp|Q9H165|BC11A_HUMAN@163
sp|Q8NCM8|DYHC2_HUMAN@2862			sp|P21333|FLNA_HUMAN@1165			sp|Q7Z5K2|WAPL_HUMAN@964
sp|O60518|RNBP6_HUMAN@31			sp|P37318|ICP34_HHV1D@232			sp|Q7Z3U7|MON2_HUMAN@1453
sp|O75691|UTP20_HUMAN@1384			sp|Q5BKZ1|ZN326_HUMAN@12			sp|Q7L5N1|CSN6_HUMAN@299
sp|Q9NPI1|BRD7_HUMAN@367			sp|Q9H0C8|ILKAP_HUMAN@135			sp|Q14118|DAG1_HUMAN@713
sp|Q9Y3P9|RBGP1_HUMAN@805			sp|Q96FZ2|HMCES_HUMAN@266			sp|Q9UPY8|MARE3_HUMAN@182
sp|Q15022|SUZ12_HUMAN@201			sp|Q7Z6Z7|HUWE1_HUMAN@1567			sp|O15344|TRI18_HUMAN@375
sp|Q86XA9|HTR5A_HUMAN@1421			sp|Q53EP0|FND3B_HUMAN@966			sp|O43823|AKAP8_HUMAN@173
sp|Q9NQS1|AVEN_HUMAN@251			sp|Q96JG6|VPS50_HUMAN@218			sp|Q8TCU6|PREX1_HUMAN@37
sp|Q12888|TP53B_HUMAN@772			sp|Q9NU22|MDN1_HUMAN@4517			sp|Q14997|PSME4_HUMAN@710
sp|Q9NPG3|UBN1_HUMAN@765			sp|P22059|OSBP1_HUMAN@224			sp|Q16555|DPYL2_HUMAN@504
sp|P22626|ROA2_HUMAN@50			sp|Q8WWY3|PRP31_HUMAN@247			sp|Q14168|MPP2_HUMAN@270
sp|P42166|LAP2A_HUMAN@684			sp|Q9Y2L1|RRP44_HUMAN@213			sp|P54252|ATX3_HUMAN@316
sp|Q5JSZ5|PRC2B_HUMAN@1482			sp|P13995|MTDC_HUMAN@145			sp|P40222|TXLNA_HUMAN@373
sp|O14757|CHK1_HUMAN@408			sp|P53396|ACLY_HUMAN@1040			sp|Q4V328|GRAP1_HUMAN@744
sp|P18433|PTPRA_HUMAN@743			sp|P49848|TAF6_HUMAN@311			sp|Q5HYK7|SH319_HUMAN@718
sp|Q99758|ABCA3_HUMAN@1494			sp|Q14738|2A5D_HUMAN@484			sp|Q96EB6|SIR1_HUMAN@253
sp|O60547|GMDS_HUMAN@92			sp|P30041|PRDX6_HUMAN@91			sp|Q8N3C0|ASCC3_HUMAN@225
sp|P54136|SYRC_HUMAN@312			sp|Q9BUF5|TBB6_HUMAN@303			sp|Q66K14|TBC9B_HUMAN@340
sp|P36969|GPX4_HUMAN@175			sp|Q15020|SART3_HUMAN@472			sp|P49916|DNLI3_HUMAN@729
sp|P52294|IMA5_HUMAN@298			sp|Q8NBW4|S38A9_HUMAN@95			sp|O00458|IFRD1_HUMAN@178
sp|Q8IUD2|RB6I2_HUMAN@258			sp|Q03701|CEBPZ_HUMAN@560			sp|P06733|ENOA_HUMAN@399
sp|P04637|P53_HUMAN@124			sp|O43149|ZZEF1_HUMAN@2084			sp|P57721|PCBP3_HUMAN@86
sp|Q13315|ATM_HUMAN@2021			sp|Q6ZPD9|D19L3_HUMAN@91			sp|Q12824|SNF5_HUMAN@167
sp|Q96T23|RSF1_HUMAN@584			sp|Q8N972|ZN709_HUMAN@543			sp|O60941|DTNB_HUMAN@309
sp|O60783|RT14_HUMAN@83			sp|Q9HAV4|XPO5_HUMAN@765			sp|O00442|RTCA_HUMAN@153
sp|Q9NR50|EI2BG_HUMAN@334			sp|P51991|ROA3_HUMAN@196			sp|Q9ULW0|TPX2_HUMAN@364
sp|Q8IWJ2|GCC2_HUMAN@257			sp|Q9BVA0|KTNB1_HUMAN@556			sp|Q9Y4X5|ARI1_HUMAN@63
sp|Q9BT22|ALG1_HUMAN@317			sp|Q9NXL9|MCM9_HUMAN@106			sp|Q9Y6J9|TAF6L_HUMAN@230
sp|P46821|MAP1B_HUMAN@73			sp|Q13459|MYO9B_HUMAN@1169			sp|Q96CS4|ZN689_HUMAN@70
sp|Q15738|NSDHL_HUMAN@132			sp|Q9H6K1|ILRUN_HUMAN@18			sp|Q8N335|GPD1L_HUMAN@104
sp|Q96P47|AGAP3_HUMAN@721			sp|Q9UQ90|SPG7_HUMAN@353			sp|P60174|TPIS_HUMAN@67
sp|Q96HA1|P121A_HUMAN@613			sp|P07814|SYEP_HUMAN@660			sp|Q9UPN7|PP6R1_HUMAN@37
sp|Q8WYP5|ELYS_HUMAN@1628			sp|Q9Y2I8|WDR37_HUMAN@417			sp|P23528|COF1_HUMAN@139
sp|Q96L73|NSD1_HUMAN@2508			sp|Q9NPI1|BRD7_HUMAN@338			sp|Q8TB03|CX038_HUMAN@300
sp|P28340|DPOD1_HUMAN@193			sp|Q9NZJ5|E2AK3_HUMAN@598			sp|P16615|AT2A2_HUMAN@560
sp|O94806|KPCD3_HUMAN@29			sp|Q2M1P5|KIF7_HUMAN@1283			sp|Q86W56|PARG_HUMAN@57
sp|P62241|RS8_HUMAN@100			sp|P04181|OAT_HUMAN@330			sp|Q8TF76|HASP_HUMAN@153
sp|Q01581|HMCS1_HUMAN@406			sp|Q06330|SUH_HUMAN@454			sp|Q9Y224|RTRAF_HUMAN@69
sp|P50748|KNTC1_HUMAN@2099			sp|P50995|ANX11_HUMAN@294			sp|Q8IWV8|UBR2_HUMAN@1619
sp|Q14204|DYHC1_HUMAN@3573			sp|Q5SW79|CE170_HUMAN@212			sp|P54826|GAS1_HUMAN@179
sp|Q96T51|RUFY1_HUMAN@603			sp|P12004|PCNA_HUMAN@162			sp|Q5IS99|CASP3_SAIBB@264
sp|O00471|EXOC5_HUMAN@254			sp|Q96PV7|F193B_HUMAN@400			sp|Q9NWZ8|GEMI8_HUMAN@180
sp|Q2TBE0|C19L2_HUMAN@402			sp|Q07864|DPOE1_HUMAN@1935			sp|Q96QR8|PURB_HUMAN@273
sp|P30307|MPIP3_HUMAN@42			sp|O15228|GNPAT_HUMAN@544			sp|P06400|RB_HUMAN@278
sp|O14802|RPC1_HUMAN@883			sp|Q5JTV8|TOIP1_HUMAN@496			sp|Q99700|ATX2_HUMAN@332
sp|P49792|RBP2_HUMAN@141			sp|Q9Y4C1|KDM3A_HUMAN@695			sp|Q14669|TRIPC_HUMAN@1276
sp|Q9NYY8|FAKD2_HUMAN@366			sp|P60953|CDC42_HUMAN@157			sp|Q9ULK4|MED23_HUMAN@98
sp|P61160|ARP2_HUMAN@11			sp|Q86WW8|COA5_HUMAN@14			sp|O60306|AQR_HUMAN@28
sp|Q96AG3|S2546_HUMAN@239			sp|Q96PM5|ZN363_HUMAN@136			sp|Q96N66|MBOA7_HUMAN@280
sp|Q9NUW8|TYDP1_HUMAN@251			sp|P62266|RS23_HUMAN@90			sp|P38117|ETFB_HUMAN@71
sp|Q9Y4P8|WIPI2_HUMAN@393			sp|Q9UBS0|KS6B2_HUMAN@348			sp|Q9P2E9|RRBP1_HUMAN@933
sp|Q658P3|STEA3_HUMAN@168			sp|P26640|SYVC_HUMAN@663			sp|Q969F9|HPS3_HUMAN@915
sp|Q9H2U2|IPYR2_HUMAN@274			sp|P49327|FAS_HUMAN@135			sp|Q96RG2|PASK_HUMAN@128
sp|P49841|GSK3B_HUMAN@218			sp|Q9HAV4|XPO5_HUMAN@736			sp|Q9Y3C6|PPIL1_HUMAN@133
sp|O60508|PRP17_HUMAN@366			sp|P28370|SMCA1_HUMAN@377			sp|P21359|NF1_HUMAN@324
sp|Q6P4H8|ACKMT_HUMAN@67			sp|Q6IQ23|PKHA7_HUMAN@542			sp|Q9UJC3|HOOK1_HUMAN@432
sp|P50542|PEX5_HUMAN@11			sp|Q8IYA6|CKP2L_HUMAN@107			sp|P50579|MAP2_HUMAN@121
sp|Q29RF7|PDS5A_HUMAN@532			sp|Q12874|SF3A3_HUMAN@145			sp|A0AVT1|UBA6_HUMAN@546
sp|P18031|PTN1_HUMAN@32			sp|Q9ULD6|INTU_HUMAN@622			sp|P40938|RFC3_HUMAN@32
sp|Q8N5J2|MINY1_HUMAN@94			sp|Q7L014|DDX46_HUMAN@590			sp|Q03468|ERCC6_HUMAN@1464
sp|P53621|COPA_HUMAN@522			sp|Q6WKZ4|RFIP1_HUMAN@1028			sp|Q9BVK2|ALG8_HUMAN@218
sp|Q14807|KIF22_HUMAN@65			sp|Q7Z6Z7|HUWE1_HUMAN@3213			sp|Q13686|ALKB1_HUMAN@371
sp|Q9UI36|DACH1_HUMAN@243			sp|Q5RKV6|EXOS6_HUMAN@117			sp|Q15648|MED1_HUMAN@489
sp|Q9NX14|NDUBB_HUMAN@141			sp|Q9Y394|DHRS7_HUMAN@147			sp|Q9NRU3|CNNM1_HUMAN@733
sp|Q4LDE5|SVEP1_HUMAN@1409			sp|Q5VTL8|PR38B_HUMAN@113			sp|Q8N972|ZN709_HUMAN@571
sp|Q9BQB6|VKOR1_HUMAN@51			sp|Q5T280|CI114_HUMAN@10			sp|Q1KMD3|HNRL2_HUMAN@602
sp|Q8NCN4|RN169_HUMAN@337			sp|Q8NEU8|DP13B_HUMAN@412			sp|O14772|FPGT_HUMAN@414
sp|O75943|RAD17_HUMAN@141			sp|Q14103|HNRPD_HUMAN@126			sp|Q8NG31|KNL1_HUMAN@1164
sp|Q13586|STIM1_HUMAN@49			sp|O95571|ETHE1_HUMAN@170			sp|Q92870|APBB2_HUMAN@560
sp|P42345|MTOR_HUMAN@374			sp|Q13136|LIPA1_HUMAN@738			sp|Q9H9A6|LRC40_HUMAN@438
sp|Q1KMD3|HNRL2_HUMAN@308			sp|Q9Y3A2|UTP11_HUMAN@201			sp|P78368|KC1G2_HUMAN@111
sp|Q9NR09|BIRC6_HUMAN@3404			sp|Q8NI37|PPTC7_HUMAN@41			sp|O94979|SC31A_HUMAN@60
sp|Q99729|ROAA_HUMAN@98			sp|Q7Z2K8|GRIN1_HUMAN@658			sp|O15173|PGRC2_HUMAN@159
sp|Q9NVU7|SDA1_HUMAN@87			sp|P53675|CLH2_HUMAN@892			sp|Q53R41|FAKD1_HUMAN@446
sp|Q9H9Q4|NHEJ1_HUMAN@253			sp|P49848|TAF6_HUMAN@235			sp|Q86Y13|DZIP3_HUMAN@583
sp|Q14344|GNA13_HUMAN@18			sp|Q9UBE0|SAE1_HUMAN@146			sp|O75607|NPM3_HUMAN@41
sp|P28340|DPOD1_HUMAN@512			sp|Q9Y4C1|KDM3A_HUMAN@753			sp|P18615|NELFE_HUMAN@297
sp|Q9NVN8|GNL3L_HUMAN@278			sp|O43309|ZSC12_HUMAN@53			sp|Q9P2B4|CT2NL_HUMAN@76
sp|Q8WUG5|S22AH_HUMAN@636			sp|Q9BVW5|TIPIN_HUMAN@139			sp|Q8N5C7|DTWD1_HUMAN@40
sp|Q8TDM6|DLG5_HUMAN@544			sp|P49411|EFTU_HUMAN@293			sp|Q7Z3U7|MON2_HUMAN@824
sp|Q9Y5Q9|TF3C3_HUMAN@810			sp|P49902|5NTC_HUMAN@181			sp|Q92574|TSC1_HUMAN@822
sp|P78316|NOP14_HUMAN@457			sp|Q99986|VRK1_HUMAN@220			sp|Q9NPF2|CHSTB_HUMAN@52
sp|P58107|EPIPL_HUMAN@4893			sp|Q9BTC0|DIDO1_HUMAN@976			sp|Q96BN8|OTUL_HUMAN@17
sp|Q9UGP4|LIMD1_HUMAN@148			sp|P22830|HEMH_HUMAN@360			sp|Q9UBU7|DBF4A_HUMAN@434
sp|Q8NI27|THOC2_HUMAN@804			sp|Q6P2I3|FAH2B_HUMAN@215			sp|O95365|ZBT7A_HUMAN@123
sp|Q86XA9|HTR5A_HUMAN@868			sp|Q96JB2|COG3_HUMAN@176			sp|Q15386|UBE3C_HUMAN@140
sp|O14867|BACH1_HUMAN@224			sp|Q16539|MK14_HUMAN@162			sp|Q12841|FSTL1_HUMAN@221
sp|O75691|UTP20_HUMAN@1794			sp|Q96B01|R51A1_HUMAN@85			sp|P40222|TXLNA_HUMAN@523
sp|Q8N9F7|GDPD1_HUMAN@107			sp|Q9Y4E8|UBP15_HUMAN@634			sp|P49736|MCM2_HUMAN@624
sp|Q9BTE3|MCMBP_HUMAN@249			sp|P22102|PUR2_HUMAN@134			sp|Q96JI7|SPTCS_HUMAN@1427
sp|O43747|AP1G1_HUMAN@539			sp|Q12769|NU160_HUMAN@916			sp|Q9NU22|MDN1_HUMAN@4192
sp|Q96LL9|DJC30_HUMAN@43			sp|O00429|DNM1L_HUMAN@505			sp|A0JNW5|BLT3B_HUMAN@476
sp|Q6P0N0|M18BP_HUMAN@206			sp|Q9HAZ1|CLK4_HUMAN@81			sp|Q16877|F264_HUMAN@430
sp|P51809|VAMP7_HUMAN@21			sp|Q16762|THTR_HUMAN@64			sp|Q15020|SART3_HUMAN@670
sp|O95456|PSMG1_HUMAN@157			sp|P43007|SATT_HUMAN@500			sp|O75718|CRTAP_HUMAN@84
sp|O60518|RNBP6_HUMAN@118			sp|O94986|CE152_HUMAN@1417			sp|Q6ZV89|SH2D5_HUMAN@160
sp|Q7Z4Q2|HEAT3_HUMAN@134			sp|P46100|ATRX_HUMAN@1242			sp|Q52LR7|EPC2_HUMAN@543
sp|P51153|RAB13_HUMAN@23			sp|Q12888|TP53B_HUMAN@1159			sp|Q5SW96|ARH_HUMAN@199
sp|P12532|KCRU_HUMAN@316			sp|Q9BWD1|THIC_HUMAN@65			sp|Q92616|GCN1_HUMAN@648
sp|Q9H5N1|RABE2_HUMAN@482			sp|P46109|CRKL_HUMAN@44			sp|Q9BVI4|NOC4L_HUMAN@100
sp|O00244|ATOX1_HUMAN@41			sp|Q12769|NU160_HUMAN@65			sp|Q8WUJ0|STYX_HUMAN@14
sp|Q9UHB7|AFF4_HUMAN@315			sp|P49790|NU153_HUMAN@404			sp|Q2TAY7|SMU1_HUMAN@219
sp|Q6P0N0|M18BP_HUMAN@400			sp|Q9Y3D2|MSRB2_HUMAN@45			sp|P20648|ATP4A_HUMAN@385
sp|Q9BU23|LMF2_HUMAN@696			sp|Q9Y4R8|TELO2_HUMAN@222			sp|Q9UPQ9|TNR6B_HUMAN@600
sp|Q53H82|LACB2_HUMAN@58			sp|P10620|MGST1_HUMAN@50			sp|A5YKK6|CNOT1_HUMAN@1457
sp|Q5UIP0|RIF1_HUMAN@1865			sp|Q99661|KIF2C_HUMAN@389			sp|Q9BZG1|RAB34_HUMAN@19
sp|Q9H5V7|IKZF5_HUMAN@409			sp|Q86XI2|CNDG2_HUMAN@776			sp|Q9UPQ8|DOLK_HUMAN@99
sp|P23193|TCEA1_HUMAN@212			sp|Q9UBX3|DIC_HUMAN@181			sp|Q86U38|NOP9_HUMAN@138
sp|Q96N67|DOCK7_HUMAN@358			sp|Q2TAZ0|ATG2A_HUMAN@1870			sp|P53779|MK10_HUMAN@283
sp|Q29RF7|PDS5A_HUMAN@589			sp|Q9H9A7|RMI1_HUMAN@268			sp|Q969F9|HPS3_HUMAN@52
sp|O00471|EXOC5_HUMAN@111			sp|Q9NRD5|PICK1_HUMAN@348			sp|P07948|LYN_HUMAN@381
sp|O95202|LETM1_HUMAN@379			sp|P23458|JAK1_HUMAN@988			sp|Q9ULE6|PALD_HUMAN@750
sp|Q8IY18|SMC5_HUMAN@881			sp|Q9H2U2|IPYR2_HUMAN@44			sp|Q99996|AKAP9_HUMAN@2010
sp|Q8TF76|HASP_HUMAN@550			sp|Q15424|SAFB1_HUMAN@448			sp|Q9UNQ2|DIM1_HUMAN@84
sp|P31939|PUR9_HUMAN@325			sp|O43776|SYNC_HUMAN@511			sp|P08651|NFIC_HUMAN@88
sp|Q9HCK1|ZDBF2_HUMAN@1597			sp|P55196|AFAD_HUMAN@1684			sp|O94916|NFAT5_HUMAN@270
sp|Q7L2E3|DHX30_HUMAN@461			sp|O95299|NDUAA_HUMAN@112			sp|P35249|RFC4_HUMAN@48
sp|Q8WZ74|CTTB2_HUMAN@759			sp|Q9C0C2|TB182_HUMAN@716			sp|P24468|COT2_HUMAN@326
sp|Q9NVH2|INT7_HUMAN@42			sp|Q2NKX8|ERC6L_HUMAN@587			sp|Q9H583|HEAT1_HUMAN@1942
sp|Q14562|DHX8_HUMAN@123			sp|P18074|ERCC2_HUMAN@259			sp|Q07890|SOS2_HUMAN@403
sp|Q9H0R6|GATA_HUMAN@483			sp|P30566|PUR8_HUMAN@27			sp|O94915|FRYL_HUMAN@288
sp|Q14669|TRIPC_HUMAN@35			sp|Q96T51|RUFY1_HUMAN@81			sp|P51970|NDUA8_HUMAN@66
sp|Q9BTW9|TBCD_HUMAN@826			sp|P01111|RASN_HUMAN@118			sp|O95155|UBE4B_HUMAN@113
sp|P21333|FLNA_HUMAN@1165			sp|Q9UPN9|TRI33_HUMAN@943			sp|Q5T011|SZT2_HUMAN@2019
sp|Q5BKZ1|ZN326_HUMAN@12			sp|Q9HBR0|S38AA_HUMAN@301			sp|Q9Y6Y8|S23IP_HUMAN@604
sp|Q9H0C8|ILKAP_HUMAN@135			sp|Q13613|MTMR1_HUMAN@305			sp|P51003|PAPOA_HUMAN@293
sp|Q96FZ2|HMCES_HUMAN@266			sp|Q9UI30|TR112_HUMAN@33			sp|P42345|MTOR_HUMAN@216
sp|Q7Z6Z7|HUWE1_HUMAN@1567			sp|P49674|KC1E_HUMAN@241			sp|Q14566|MCM6_HUMAN@393
sp|Q53EP0|FND3B_HUMAN@966			sp|Q02833|RASF7_HUMAN@152			sp|Q8WWI1|LMO7_HUMAN@98
sp|Q96JG6|VPS50_HUMAN@218			sp|O15027|SC16A_HUMAN@1522			sp|Q9BRX9|WDR83_HUMAN@23
sp|Q9NU22|MDN1_HUMAN@4517			sp|P07992|ERCC1_HUMAN@274			sp|Q02224|CENPE_HUMAN@2602
sp|P22059|OSBP1_HUMAN@224			sp|Q12789|TF3C1_HUMAN@42			sp|O43929|ORC4_HUMAN@16
sp|Q8WWY3|PRP31_HUMAN@247			sp|O75582|KS6A5_HUMAN@631			sp|P53602|MVD1_HUMAN@82
sp|Q9Y2L1|RRP44_HUMAN@213			sp|Q14692|BMS1_HUMAN@556			sp|Q14CB8|RHG19_HUMAN@28
sp|P13995|MTDC_HUMAN@145			sp|P53621|COPA_HUMAN@453			sp|Q5TGY3|AHDC1_HUMAN@1422
sp|P53396|ACLY_HUMAN@1040			sp|P08047|SP1_HUMAN@68			sp|Q9NPR2|SEM4B_HUMAN@761
sp|P49848|TAF6_HUMAN@311			sp|O00231|PSD11_HUMAN@202			sp|Q9UIA9|XPO7_HUMAN@123
sp|Q14738|2A5D_HUMAN@484			sp|Q6PJT7|ZC3HE_HUMAN@682			sp|Q5VWG9|TAF3_HUMAN@431
sp|P30041|PRDX6_HUMAN@91			sp|Q6PJF5|RHDF2_HUMAN@181			sp|Q9P2J3|KLHL9_HUMAN@559
sp|Q9BUF5|TBB6_HUMAN@303			sp|P13010|XRCC5_HUMAN@235			sp|Q86Y56|DAAF5_HUMAN@555
sp|Q15020|SART3_HUMAN@472			sp|Q49A26|GLYR1_HUMAN@231			sp|Q5T7M9|DIK1A_HUMAN@6
sp|O00411|RPOM_HUMAN@398			sp|Q14203|DCTN1_HUMAN@1252			sp|Q9Y2H2|SAC2_HUMAN@960
sp|Q9UBZ4|APEX2_HUMAN@368			sp|Q14145|KEAP1_HUMAN@77			sp|Q5VUA4|ZN318_HUMAN@2040
sp|Q03701|CEBPZ_HUMAN@560			sp|P46060|RAGP1_HUMAN@82			sp|Q15034|HERC3_HUMAN@552
sp|Q9BRK4|LZTS2_HUMAN@74			sp|O60264|SMCA5_HUMAN@165			sp|Q6PJG6|BRAT1_HUMAN@366
sp|O43149|ZZEF1_HUMAN@2084			sp|Q8IVH2|FOXP4_HUMAN@342			sp|Q68E01|INT3_HUMAN@80
sp|Q9HAV4|XPO5_HUMAN@765			sp|P07814|SYEP_HUMAN@744			sp|P54886|P5CS_HUMAN@88
sp|P51991|ROA3_HUMAN@196			sp|Q9H792|PEAK1_HUMAN@1681			sp|Q8N0Z3|SPICE_HUMAN@796
sp|P29322|EPHA8_HUMAN@520			sp|Q14493|SLBP_HUMAN@15			sp|P33981|TTK_HUMAN@322
sp|Q9BVA0|KTNB1_HUMAN@556			sp|P03243|E1B55_ADE05@310			sp|Q9BT25|HAUS8_HUMAN@354
sp|Q9NXL9|MCM9_HUMAN@106			sp|Q9Y6R4|M3K4_HUMAN@193			sp|Q96FV9|THOC1_HUMAN@396
sp|Q13459|MYO9B_HUMAN@1169			sp|A2RRP1|NBAS_HUMAN@1453			sp|Q96L91|EP400_HUMAN@1775
sp|Q9P2E3|ZNFX1_HUMAN@1822			sp|Q12802|AKP13_HUMAN@418			sp|Q9NQT8|KI13B_HUMAN@1529
sp|Q9Y2T4|2ABG_HUMAN@258			sp|Q9H2C0|GAN_HUMAN@452			sp|P0C7T5|ATX1L_HUMAN@11
sp|Q9H6K1|ILRUN_HUMAN@18			sp|P21281|VATB2_HUMAN@112			sp|Q96B36|AKTS1_HUMAN@61
sp|Q9UQ90|SPG7_HUMAN@353			sp|O75717|WDHD1_HUMAN@1008			sp|Q8TDY2|RBCC1_HUMAN@820
sp|P07814|SYEP_HUMAN@660			sp|Q8IZ52|CHSS2_HUMAN@736			sp|Q7L1V2|MON1B_HUMAN@268
sp|Q9NZJ5|E2AK3_HUMAN@598			sp|Q92841|DDX17_HUMAN@319			sp|Q99661|KIF2C_HUMAN@40
sp|Q9NPI1|BRD7_HUMAN@338			sp|Q5VTB9|RN220_HUMAN@359			sp|Q3KP31|ZN791_HUMAN@311
sp|Q2M1P5|KIF7_HUMAN@1283			sp|Q69YH5|CDCA2_HUMAN@188			sp|Q8ND04|SMG8_HUMAN@72
sp|O75592|MYCB2_HUMAN@3263			sp|Q9Y620|RA54B_HUMAN@789			sp|Q96DX4|RSPRY_HUMAN@190
sp|P04181|OAT_HUMAN@330			sp|Q96AY4|TTC28_HUMAN@726			sp|Q8NAN2|MIGA1_HUMAN@128
sp|Q06330|SUH_HUMAN@454			sp|O00244|ATOX1_HUMAN@15			sp|Q8NDZ2|SIMC1_HUMAN@430
sp|Q9ULJ6|ZMIZ1_HUMAN@742			sp|P84095|RHOG_HUMAN@157			sp|Q8TAT6|NPL4_HUMAN@355
sp|Q15154|PCM1_HUMAN@582			sp|Q9H4B4|PLK3_HUMAN@142			sp|Q7Z401|MYCPP_HUMAN@1137
sp|O60671|RAD1_HUMAN@148			sp|P51965|UB2E1_HUMAN@67			sp|O76094|SRP72_HUMAN@128
sp|O00116|ADAS_HUMAN@565			sp|O00139|KIF2A_HUMAN@420			sp|P51114|FXR1_HUMAN@211
sp|A0A1W2PPD8|KDM4F_HUMAN@391			sp|P42858|HD_HUMAN@2108			sp|Q9UHJ6|SHPK_HUMAN@132
sp|P50995|ANX11_HUMAN@294			sp|Q96AE4|FUBP1_HUMAN@332			sp|P09382|LEG1_HUMAN@43
sp|Q5SW79|CE170_HUMAN@212			sp|Q5QJE6|TDIF2_HUMAN@618			sp|Q3SY69|AL1L2_HUMAN@683
sp|P12004|PCNA_HUMAN@162			sp|P10644|KAP0_HUMAN@362			sp|Q9BZI7|REN3B_HUMAN@453
sp|Q96PV7|F193B_HUMAN@400			sp|P41091|IF2G_HUMAN@348			sp|O95405|ZFYV9_HUMAN@661
sp|Q07864|DPOE1_HUMAN@1935			sp|P22314|UBA1_HUMAN@481			sp|Q9Y3E5|PTH2_HUMAN@111
sp|Q9Y4C1|KDM3A_HUMAN@695			sp|Q9BPZ7|SIN1_HUMAN@149			sp|O75410|TACC1_HUMAN@78
sp|Q12770|SCAP_HUMAN@461			sp|Q8NCH0|CHSTE_HUMAN@117			sp|P17812|PYRG1_HUMAN@218
sp|Q9UK41|VPS28_HUMAN@103			sp|Q02156|KPCE_HUMAN@352			sp|Q06730|ZN33A_HUMAN@256
sp|P62266|RS23_HUMAN@90			sp|Q562E7|WDR81_HUMAN@643			sp|O94829|IPO13_HUMAN@810
sp|Q9UBS0|KS6B2_HUMAN@348			sp|P49368|TCPG_HUMAN@173			sp|Q6VUC0|AP2E_HUMAN@329
sp|P26640|SYVC_HUMAN@663			sp|Q96J02|ITCH_HUMAN@835			sp|Q86Y56|DAAF5_HUMAN@173
sp|P49327|FAS_HUMAN@135			sp|Q9GZR7|DDX24_HUMAN@49			sp|Q9NX47|MARH5_HUMAN@188
sp|Q9HAV4|XPO5_HUMAN@736			sp|O00159|MYO1C_HUMAN@585			sp|O94874|UFL1_HUMAN@143
sp|Q562E7|WDR81_HUMAN@130			sp|Q9NYZ3|GTSE1_HUMAN@343			sp|P78527|PRKDC_HUMAN@2435
sp|Q6IQ23|PKHA7_HUMAN@542			sp|P16615|AT2A2_HUMAN@377			sp|Q5VYS8|TUT7_HUMAN@649
sp|Q9Y2M0|FAN1_HUMAN@510			sp|Q9H3H1|MOD5_HUMAN@298			sp|O14802|RPC1_HUMAN@783
sp|P49915|GUAA_HUMAN@456			sp|Q9H0W9|CK054_HUMAN@226			sp|P78527|PRKDC_HUMAN@703
sp|Q8IYA6|CKP2L_HUMAN@107			sp|P13797|PLST_HUMAN@33			sp|P10721|KIT_HUMAN@691
sp|Q12874|SF3A3_HUMAN@145			sp|Q96QK1|VPS35_HUMAN@640			sp|Q75QN2|INT8_HUMAN@580
sp|Q9ULD6|INTU_HUMAN@622			sp|Q92499|DDX1_HUMAN@638			sp|P10588|NR2F6_HUMAN@203
sp|Q7L014|DDX46_HUMAN@590			sp|Q93008|USP9X_HUMAN@673			sp|Q2M1P5|KIF7_HUMAN@415
sp|Q7Z6Z7|HUWE1_HUMAN@3213			sp|Q6NTE8|MRNIP_HUMAN@300			sp|Q8N3U4|STAG2_HUMAN@632
sp|Q5RKV6|EXOS6_HUMAN@117			sp|Q9UJX3|APC7_HUMAN@475			sp|Q9NR09|BIRC6_HUMAN@4828
sp|Q3KP31|ZN791_HUMAN@227			sp|A0A1B0GUS4|UB2L5_HUMAN@86			sp|Q86X55|CARM1_HUMAN@26
sp|Q9Y394|DHRS7_HUMAN@147			sp|P50213|IDH3A_HUMAN@331			sp|O94822|LTN1_HUMAN@91
sp|Q5VTL8|PR38B_HUMAN@113			sp|Q13162|PRDX4_HUMAN@245			sp|O60941|DTNB_HUMAN@560
sp|Q5T280|CI114_HUMAN@10			sp|Q9UGV2|NDRG3_HUMAN@166			sp|Q96EY7|PTCD3_HUMAN@551
sp|Q9Y3A2|UTP11_HUMAN@201			sp|Q8NBR6|MINY2_HUMAN@385			sp|P11498|PYC_HUMAN@56
sp|O95571|ETHE1_HUMAN@170			sp|Q96RS6|NUDC1_HUMAN@111			sp|Q9UNM6|PSD13_HUMAN@357
sp|Q8NEU8|DP13B_HUMAN@412			sp|Q9H0H3|KLH25_HUMAN@287			sp|Q7Z3K3|POGZ_HUMAN@547
sp|Q13136|LIPA1_HUMAN@738			sp|Q9UNF1|MAGD2_HUMAN@516			sp|Q8TER5|ARH40_HUMAN@1158
sp|Q8NI37|PPTC7_HUMAN@41			sp|Q99873|ANM1_HUMAN@119			sp|O43609|SPY1_HUMAN@310
sp|Q7Z2K8|GRIN1_HUMAN@658			sp|P10398|ARAF_HUMAN@144			sp|Q15643|TRIPB_HUMAN@1329
sp|P53675|CLH2_HUMAN@892			sp|Q8N5F7|NKAP_HUMAN@47			sp|P48444|COPD_HUMAN@94
sp|P49848|TAF6_HUMAN@235			sp|P10244|MYBB_HUMAN@69			sp|Q9NUJ3|T11L1_HUMAN@495
sp|O00443|P3C2A_HUMAN@908			sp|Q9H6U6|BCAS3_HUMAN@442			sp|Q15173|2A5B_HUMAN@113
sp|Q9UBE0|SAE1_HUMAN@146			sp|Q96FZ2|HMCES_HUMAN@39			sp|Q9Y4D8|HECD4_HUMAN@1783
sp|Q9Y4C1|KDM3A_HUMAN@753			sp|Q9P289|STK26_HUMAN@392			sp|Q86WG5|MTMRD_HUMAN@525
sp|Q9BVW5|TIPIN_HUMAN@139			sp|Q5SW79|CE170_HUMAN@30			sp|O60232|ZNRD2_HUMAN@125
sp|P49411|EFTU_HUMAN@293			sp|Q9UNW1|MINP1_HUMAN@232			sp|Q14964|RB39A_HUMAN@23
sp|P49902|5NTC_HUMAN@181			sp|P21333|FLNA_HUMAN@1260			sp|Q93034|CUL5_HUMAN@104
sp|Q99986|VRK1_HUMAN@220			sp|A6NDG6|PGP_HUMAN@272			sp|Q6NUN9|ZN746_HUMAN@425
sp|Q9BTC0|DIDO1_HUMAN@976			sp|Q5T280|CI114_HUMAN@239			sp|Q9BTE3|MCMBP_HUMAN@636
sp|Q8NBZ7|UXS1_HUMAN@230			sp|Q6P5Z2|PKN3_HUMAN@840			sp|Q9UPQ9|TNR6B_HUMAN@557
sp|Q6P2I3|FAH2B_HUMAN@215			sp|Q9Y4C2|TCAF1_HUMAN@598			sp|Q14315|FLNC_HUMAN@2154
sp|Q96JB2|COG3_HUMAN@176			sp|Q8IXM2|BAP18_HUMAN@66			sp|Q9H0R6|GATA_HUMAN@278
sp|Q16539|MK14_HUMAN@162			sp|P62745|RHOB_HUMAN@159			sp|Q96C28|ZN707_HUMAN@150
sp|Q96B01|R51A1_HUMAN@85			sp|Q02952|AKA12_HUMAN@1479			sp|O15027|SC16A_HUMAN@1293
sp|Q9Y4E8|UBP15_HUMAN@634			sp|Q9BTA9|WAC_HUMAN@615			sp|Q15650|TRIP4_HUMAN@86
sp|Q96GX9|MTNB_HUMAN@147			sp|Q3SY69|AL1L2_HUMAN@707			sp|Q8N726|ARF_HUMAN@15
sp|P22102|PUR2_HUMAN@134			sp|Q9Y520|PRC2C_HUMAN@895			sp|Q9H0P0|5NT3A_HUMAN@73
sp|Q12769|NU160_HUMAN@916			sp|P52948|NUP98_HUMAN@1419			sp|Q8IYN0|ZN100_HUMAN@17
sp|Q9H2D6|TARA_HUMAN@2280			sp|Q9UK61|TASOR_HUMAN@690			sp|Q9NVI1|FANCI_HUMAN@1025
sp|Q13503|MED21_HUMAN@103			sp|Q96EK5|KBP_HUMAN@231			sp|Q9BTY2|FUCO2_HUMAN@277
sp|O00429|DNM1L_HUMAN@505			sp|Q99700|ATX2_HUMAN@301			sp|Q14004|CDK13_HUMAN@80
sp|Q9HAZ1|CLK4_HUMAN@81			sp|O43683|BUB1_HUMAN@201			sp|Q02880|TOP2B_HUMAN@271
sp|Q16762|THTR_HUMAN@64			sp|Q8TED9|AF1L1_HUMAN@78			sp|P42679|MATK_HUMAN@16
sp|P43007|SATT_HUMAN@500			sp|A1L0T0|HACL2_HUMAN@276			sp|Q02241|KIF23_HUMAN@165
sp|O43242|PSMD3_HUMAN@210			sp|Q92945|FUBP2_HUMAN@176			sp|Q9NPD3|EXOS4_HUMAN@97
sp|P46100|ATRX_HUMAN@1242			sp|Q9NWL6|ASND1_HUMAN@102			sp|Q12923|PTN13_HUMAN@1467
sp|Q12888|TP53B_HUMAN@1159			sp|Q69YL0|NCAS2_HUMAN@63			sp|P61599|NAA20_HUMAN@9
sp|Q9BWD1|THIC_HUMAN@65			sp|P25205|MCM3_HUMAN@407			sp|Q9P2J8|ZN624_HUMAN@372
sp|P46109|CRKL_HUMAN@44			sp|P07948|LYN_HUMAN@468			sp|Q5VUA4|ZN318_HUMAN@1903
sp|Q12769|NU160_HUMAN@65			sp|Q9Y5X3|SNX5_HUMAN@250			sp|Q12906|ILF3_HUMAN@203
sp|O15269|SPTC1_HUMAN@438			sp|P23588|IF4B_HUMAN@457			sp|Q9BYG4|PAR6G_HUMAN@112
sp|P49790|NU153_HUMAN@404			sp|Q7L0Y3|TM10C_HUMAN@123			sp|Q5SXM1|ZN678_HUMAN@89
sp|Q9Y4R8|TELO2_HUMAN@222			sp|Q9NRL2|BAZ1A_HUMAN@537			sp|Q99708|CTIP_HUMAN@543
sp|P10620|MGST1_HUMAN@50			sp|Q6QNY1|BL1S2_HUMAN@41			sp|P52789|HXK2_HUMAN@909
sp|Q99661|KIF2C_HUMAN@389			sp|P49419|AL7A1_HUMAN@522			sp|Q9H7N4|SFR19_HUMAN@826
sp|Q96Q15|SMG1_HUMAN@3138			sp|Q96N21|AP4AT_HUMAN@52			sp|Q4ADV7|RIC1_HUMAN@13
sp|Q86XI2|CNDG2_HUMAN@776			sp|O95382|M3K6_HUMAN@962			sp|Q9NZJ4|SACS_HUMAN@814
sp|Q9UBX3|DIC_HUMAN@181			sp|Q9H6U6|BCAS3_HUMAN@479			sp|P26640|SYVC_HUMAN@194
sp|Q2TAZ0|ATG2A_HUMAN@1870			sp|Q9Y5L0|TNPO3_HUMAN@125			sp|Q9BZF9|UACA_HUMAN@408
sp|Q9Y253|POLH_HUMAN@227			sp|Q13155|AIMP2_HUMAN@168			sp|Q9BW27|NUP85_HUMAN@51
sp|Q8IWE5|PKHM2_HUMAN@1009			sp|Q9Y490|TLN1_HUMAN@1353			sp|Q9UBQ5|EIF3K_HUMAN@87
sp|Q96BU1|S1PBP_HUMAN@156			sp|O15534|PER1_HUMAN@641			sp|Q96QU8|XPO6_HUMAN@324
sp|Q9H9A7|RMI1_HUMAN@268			sp|Q9NRH3|TBG2_HUMAN@201			sp|B2RTY4|MYO9A_HUMAN@32
sp|Q96AA3|RFT1_HUMAN@70			sp|P62937|PPIA_HUMAN@52			sp|Q96T51|RUFY1_HUMAN@351
sp|Q9NRD5|PICK1_HUMAN@348			sp|O75970|MPDZ_HUMAN@119			sp|P50613|CDK7_HUMAN@312
sp|P23458|JAK1_HUMAN@988			sp|Q14202|ZMYM3_HUMAN@1048			sp|Q8TBF5|PIGX_HUMAN@43
sp|Q9H2U2|IPYR2_HUMAN@44			sp|O14727|APAF_HUMAN@258			sp|Q9NZJ4|SACS_HUMAN@3655
sp|O43776|SYNC_HUMAN@511			sp|Q96CM8|ACSF2_HUMAN@122			sp|Q9GZP1|NRSN2_HUMAN@115
sp|Q15424|SAFB1_HUMAN@448			sp|Q9NZ01|TECR_HUMAN@18			sp|O75385|ULK1_HUMAN@408
sp|Q9BZQ8|NIBA1_HUMAN@516			sp|Q9Y4C8|RBM19_HUMAN@293			sp|O60504|VINEX_HUMAN@482
sp|P55196|AFAD_HUMAN@1684			sp|Q86VP6|CAND1_HUMAN@131			sp|Q9BUN5|CC28B_HUMAN@13
sp|O95299|NDUAA_HUMAN@112			sp|O60518|RNBP6_HUMAN@188			sp|Q63HN8|RN213_HUMAN@856
sp|Q9C0C2|TB182_HUMAN@716			sp|Q9H8V3|ECT2_HUMAN@796			sp|P46459|NSF_HUMAN@264
sp|Q2NKX8|ERC6L_HUMAN@587			sp|P51970|NDUA8_HUMAN@110			sp|Q9BSF8|BTBDA_HUMAN@419
sp|P18074|ERCC2_HUMAN@259			sp|Q9GZR2|REXO4_HUMAN@418			sp|Q9NQ11|AT132_HUMAN@401
sp|Q2NKX8|ERC6L_HUMAN@998			sp|O00429|DNM1L_HUMAN@345			sp|P46100|ATRX_HUMAN@618
sp|P30566|PUR8_HUMAN@27			sp|Q8N972|ZN709_HUMAN@515			sp|P11388|TOP2A_HUMAN@733
sp|Q96T51|RUFY1_HUMAN@81			sp|Q8TBC3|SHKB1_HUMAN@550			sp|Q8N543|OGFD1_HUMAN@143
sp|P01111|RASN_HUMAN@118			sp|Q9BT17|MTG1_HUMAN@262			sp|Q99460|PSMD1_HUMAN@806
sp|Q9UPN9|TRI33_HUMAN@943			sp|Q9HC35|EMAL4_HUMAN@311			sp|P12931|SRC_HUMAN@403
sp|Q86V48|LUZP1_HUMAN@594			sp|Q9BQG0|MBB1A_HUMAN@1046			sp|P49327|FAS_HUMAN@2202
sp|Q9UPU5|UBP24_HUMAN@1580			sp|Q96IY1|NSL1_HUMAN@224			sp|Q14691|PSF1_HUMAN@75
sp|Q9UNK9|ANGE1_HUMAN@27			sp|Q8NEY1|NAV1_HUMAN@1508			sp|Q15014|MO4L2_HUMAN@165
sp|Q9HBR0|S38AA_HUMAN@301			sp|Q92750|TAF4B_HUMAN@719			sp|Q86UT8|CATAC_HUMAN@16
sp|Q13613|MTMR1_HUMAN@305			sp|Q8NG31|KNL1_HUMAN@1847			sp|Q8TBM8|DJB14_HUMAN@178
sp|Q9UI30|TR112_HUMAN@33			sp|P15735|PHKG2_HUMAN@188			sp|Q9Y4W2|LAS1L_HUMAN@173
sp|Q02833|RASF7_HUMAN@152			sp|Q13572|ITPK1_HUMAN@31			sp|Q8IYQ7|THNS1_HUMAN@532
sp|O75582|KS6A5_HUMAN@631			sp|P56589|PEX3_HUMAN@65			sp|Q96BK5|PINX1_HUMAN@265
sp|Q14692|BMS1_HUMAN@556			sp|O95297|MPZL1_HUMAN@203			sp|Q99497|PARK7_HUMAN@46
sp|P53621|COPA_HUMAN@453			sp|Q13615|MTMR3_HUMAN@867			sp|P63167|DYL1_HUMAN@24
sp|P08047|SP1_HUMAN@68			sp|Q6P2E9|EDC4_HUMAN@838			sp|Q9BVP2|GNL3_HUMAN@113
sp|Q6PJT7|ZC3HE_HUMAN@682			sp|P24994|GB_HSV2S@345			sp|Q99707|METH_HUMAN@798
sp|O00231|PSD11_HUMAN@202			sp|P08243|ASNS_HUMAN@255			sp|P49756|RBM25_HUMAN@132
sp|P13010|XRCC5_HUMAN@235			sp|Q9Y2D4|EXC6B_HUMAN@392			sp|Q86UL3|GPAT4_HUMAN@285
sp|Q49A26|GLYR1_HUMAN@231			sp|Q6ZNB6|NFXL1_HUMAN@827			sp|Q99538|LGMN_HUMAN@50
sp|Q14203|DCTN1_HUMAN@1252			sp|Q8NHV4|NEDD1_HUMAN@314			sp|P78527|PRKDC_HUMAN@2342
sp|P46060|RAGP1_HUMAN@82			sp|Q5T3I0|GPTC4_HUMAN@333			sp|O95714|HERC2_HUMAN@1037
sp|O60264|SMCA5_HUMAN@165			sp|Q9UHB9|SRP68_HUMAN@344			sp|Q9BTA9|WAC_HUMAN@553
sp|O95155|UBE4B_HUMAN@552			sp|P54098|DPOG1_HUMAN@647			sp|Q96SI9|STRBP_HUMAN@142
sp|P07814|SYEP_HUMAN@744			sp|P03243|E1B55_ADE05@483			sp|P05388|RLA0_HUMAN@119
sp|Q9BYT8|NEUL_HUMAN@199			sp|Q8IX15|HOMEZ_HUMAN@273			sp|Q96T51|RUFY1_HUMAN@320
sp|Q14493|SLBP_HUMAN@15			sp|O60306|AQR_HUMAN@1245			sp|Q9H0A0|NAT10_HUMAN@505
sp|P03243|E1B55_ADE05@310			sp|Q9UGN5|PARP2_HUMAN@474			sp|Q9H7X3|ZN696_HUMAN@74
sp|Q7Z2Z2|EFL1_HUMAN@953			sp|P29374|ARI4A_HUMAN@849			sp|Q13322|GRB10_HUMAN@321
sp|P11586|C1TC_HUMAN@152			sp|O75044|SRGP2_HUMAN@820			sp|Q3T8J9|GON4L_HUMAN@147
sp|A2RRP1|NBAS_HUMAN@1453			sp|Q15366|PCBP2_HUMAN@158			sp|Q6P0N0|M18BP_HUMAN@890
sp|P21281|VATB2_HUMAN@112			sp|Q96JN8|NEUL4_HUMAN@1324			sp|O95402|MED26_HUMAN@356
sp|Q14168|MPP2_HUMAN@334			sp|Q8N7W2|BEND7_HUMAN@205			sp|Q9Y5T5|UBP16_HUMAN@191
sp|O94905|ERLN2_HUMAN@76			sp|P55263|ADK_HUMAN@353			sp|Q96L73|NSD1_HUMAN@2273
sp|A0FGR8|ESYT2_HUMAN@181			sp|Q15527|SURF2_HUMAN@127			sp|Q9NRF8|PYRG2_HUMAN@216
sp|O75717|WDHD1_HUMAN@1008			sp|Q14289|FAK2_HUMAN@180			sp|O15228|GNPAT_HUMAN@54
sp|Q5VTB9|RN220_HUMAN@359			sp|Q9P055|JKAMP_HUMAN@181			sp|Q9ULU4|ZMYD8_HUMAN@138
sp|Q92841|DDX17_HUMAN@319			sp|Q86UT6|NLRX1_HUMAN@481			sp|Q9NVG8|TBC13_HUMAN@131
sp|Q69YH5|CDCA2_HUMAN@188			sp|Q92598|HS105_HUMAN@650			sp|Q4VC44|FWCH1_HUMAN@657
sp|Q9Y4W2|LAS1L_HUMAN@504			sp|P36578|RL4_HUMAN@125			sp|Q7Z5K2|WAPL_HUMAN@831
sp|Q9Y620|RA54B_HUMAN@789			sp|Q8WUK0|PTPM1_HUMAN@81			sp|Q96JQ2|CLMN_HUMAN@353
sp|P63096|GNAI1_HUMAN@139			sp|P25116|PAR1_HUMAN@411			sp|Q96SB8|SMC6_HUMAN@346
sp|Q96AY4|TTC28_HUMAN@726			sp|Q9Y450|HBS1L_HUMAN@504			sp|Q5VVJ2|MYSM1_HUMAN@445
sp|Q96JP2|MY15B_HUMAN@2327			sp|Q9C0H5|RHG39_HUMAN@368			sp|P29144|TPP2_HUMAN@28
sp|O00244|ATOX1_HUMAN@15			sp|Q9NVN8|GNL3L_HUMAN@322			sp|O43318|M3K7_HUMAN@588
sp|P84095|RHOG_HUMAN@157			sp|O43491|E41L2_HUMAN@424			sp|P23526|SAHH_HUMAN@228
sp|P51965|UB2E1_HUMAN@67			sp|Q9HAK2|COE2_HUMAN@254			sp|P17676|CEBPB_HUMAN@184
sp|Q9Y2Z2|MTO1_HUMAN@707			sp|Q9UPZ3|HPS5_HUMAN@222			sp|Q5W0B1|OBI1_HUMAN@338
sp|Q96AE4|FUBP1_HUMAN@332			sp|Q96Q42|ALS2_HUMAN@664			sp|Q9UIG0|BAZ1B_HUMAN@1006
sp|Q5QJE6|TDIF2_HUMAN@618			sp|O75369|FLNB_HUMAN@1326			sp|Q8N8D1|PDCD7_HUMAN@159
sp|Q5TA45|INT11_HUMAN@195			sp|P46100|ATRX_HUMAN@450			sp|Q15154|PCM1_HUMAN@1717
sp|Q96RU3|FNBP1_HUMAN@609			sp|Q1KMD3|HNRL2_HUMAN@293			sp|Q99767|APBA2_HUMAN@654
sp|Q8N3C0|ASCC3_HUMAN@208			sp|P17509|HXB6_HUMAN@72			sp|P35251|RFC1_HUMAN@752
sp|P41091|IF2G_HUMAN@348			sp|P51530|DNA2_HUMAN@569			sp|Q96GM8|TOE1_HUMAN@80
sp|P22314|UBA1_HUMAN@481			sp|Q9BZL6|KPCD2_HUMAN@84			sp|O14777|NDC80_HUMAN@449
sp|Q9BPZ7|SIN1_HUMAN@149			sp|Q76FK4|NOL8_HUMAN@259			sp|P50552|VASP_HUMAN@334
sp|Q562E7|WDR81_HUMAN@643			sp|P51991|ROA3_HUMAN@64			sp|Q6ZN30|BNC2_HUMAN@827
sp|P49368|TCPG_HUMAN@173			sp|P35914|HMGCL_HUMAN@307			sp|O75152|ZC11A_HUMAN@209
sp|Q96J02|ITCH_HUMAN@835			sp|Q6PCE3|PGM2L_HUMAN@303			sp|Q96HN2|SAHH3_HUMAN@187
sp|Q9GZR7|DDX24_HUMAN@49			sp|Q9UKC9|FBXL2_HUMAN@376			sp|Q08AM6|VAC14_HUMAN@620
sp|Q9NYZ3|GTSE1_HUMAN@343			sp|Q8WUY9|DEP1B_HUMAN@169			sp|Q9UHI6|DDX20_HUMAN@338
sp|P16615|AT2A2_HUMAN@377			sp|Q15118|PDK1_HUMAN@240			sp|Q07912|ACK1_HUMAN@434
sp|P13797|PLST_HUMAN@33			sp|Q96S59|RANB9_HUMAN@462			sp|P62993|GRB2_HUMAN@32
sp|Q9BTW9|TBCD_HUMAN@681			sp|Q9Y3I0|RTCB_HUMAN@295			sp|Q8IZH2|XRN1_HUMAN@657
sp|Q96QK1|VPS35_HUMAN@640			sp|Q9NW08|RPC2_HUMAN@815			sp|Q08J23|NSUN2_HUMAN@93
sp|Q9H825|METL8_HUMAN@146			sp|Q92793|CBP_HUMAN@1219			sp|Q9BRP4|PAAF1_HUMAN@71
sp|Q92499|DDX1_HUMAN@638			sp|Q9NXN4|GDAP2_HUMAN@348			sp|P31277|HXD11_HUMAN@148
sp|Q93008|USP9X_HUMAN@673			sp|Q6PJW8|CNST_HUMAN@292			sp|P12109|CO6A1_HUMAN@774
sp|Q6NTE8|MRNIP_HUMAN@300			sp|Q9HAV4|XPO5_HUMAN@419			sp|Q9Y2D8|ADIP_HUMAN@547
sp|Q9UJX3|APC7_HUMAN@475			sp|O94925|GLSK_HUMAN@266			sp|Q96QT6|PHF12_HUMAN@335
sp|A0A1B0GUS4|UB2L5_HUMAN@86			sp|Q14232|EI2BA_HUMAN@218			sp|Q9HBH0|RHOF_HUMAN@30
sp|P50213|IDH3A_HUMAN@331			sp|Q8IYH5|ZZZ3_HUMAN@268			sp|Q05655|KPCD_HUMAN@509
sp|Q13162|PRDX4_HUMAN@245			sp|P85037|FOXK1_HUMAN@254			sp|P21333|FLNA_HUMAN@2543
sp|Q86UB9|TM135_HUMAN@316			sp|Q9H307|PININ_HUMAN@439			sp|Q92616|GCN1_HUMAN@1275
sp|Q9UGV2|NDRG3_HUMAN@166			sp|Q13454|TUSC3_HUMAN@123			sp|Q96JH8|RADIL_HUMAN@671
sp|Q92698|RAD54_HUMAN@46			sp|O00471|EXOC5_HUMAN@542			sp|P08621|RU17_HUMAN@39
sp|Q96RS6|NUDC1_HUMAN@111			sp|Q8IWX8|CHERP_HUMAN@69			sp|P09884|DPOLA_HUMAN@592
sp|Q9H0H3|KLH25_HUMAN@287			sp|P49411|EFTU_HUMAN@225			sp|Q96BY7|ATG2B_HUMAN@1688
sp|Q9UNF1|MAGD2_HUMAN@516			sp|Q9H3G5|CPVL_HUMAN@320			sp|P30084|ECHM_HUMAN@111
sp|Q99873|ANM1_HUMAN@119			sp|P15924|DESP_HUMAN@1805			sp|O15067|PUR4_HUMAN@1338
sp|P10398|ARAF_HUMAN@144			sp|P43487|RANG_HUMAN@158			sp|P30050|RL12_HUMAN@17
sp|Q8N5F7|NKAP_HUMAN@47			sp|Q9UPT5|EXOC7_HUMAN@667			sp|O60343|TBCD4_HUMAN@885
sp|Q12955|ANK3_HUMAN@4321			sp|Q15390|MTFR1_HUMAN@49			sp|P62495|ERF1_HUMAN@127
sp|P55735|SEC13_HUMAN@234			sp|Q9NRA2|S17A5_HUMAN@83			sp|Q96AC1|FERM2_HUMAN@426
sp|A8K855|EFCB7_HUMAN@174			sp|Q93008|USP9X_HUMAN@577			sp|Q16658|FSCN1_HUMAN@397
sp|Q66K14|TBC9B_HUMAN@76			sp|Q9H967|WDR76_HUMAN@527			sp|Q9UIS9|MBD1_HUMAN@28
sp|Q9Y3B9|RRP15_HUMAN@49			sp|Q8TCX1|DC2L1_HUMAN@248			sp|P30876|RPB2_HUMAN@892
sp|Q02338|BDH_HUMAN@221			sp|Q9Y530|OARD1_HUMAN@24			sp|Q9BY67|CADM1_HUMAN@220
sp|Q9Y4Z0|LSM4_HUMAN@45			sp|P00749|UROK_HUMAN@39			sp|Q9UHD8|SEPT9_HUMAN@248
sp|Q69YN2|C19L1_HUMAN@141			sp|O14646|CHD1_HUMAN@411			sp|Q8NDT2|RB15B_HUMAN@128
sp|Q96FZ2|HMCES_HUMAN@39			sp|Q7Z417|NUFP2_HUMAN@234			sp|Q9UBD5|ORC3_HUMAN@483
sp|Q9P289|STK26_HUMAN@392			sp|Q9BXP5|SRRT_HUMAN@412			sp|P52597|HNRPF_HUMAN@122
sp|Q53HV7|SMUG1_HUMAN@73			sp|Q9BRV8|SIKE1_HUMAN@164			sp|Q86XN8|MEX3D_HUMAN@488
sp|Q9UNW1|MINP1_HUMAN@232			sp|Q12788|TBL3_HUMAN@444			sp|Q02543|RL18A_HUMAN@16
sp|P21333|FLNA_HUMAN@1260			sp|Q9Y6D6|BIG1_HUMAN@1729			sp|Q9Y4B4|ARIP4_HUMAN@764
sp|A6NDG6|PGP_HUMAN@272			sp|Q7L2E3|DHX30_HUMAN@30			sp|Q86YV6|MYLK4_HUMAN@318
sp|Q5T280|CI114_HUMAN@239			sp|O96011|PX11B_HUMAN@153			sp|Q6ZT98|TTLL7_HUMAN@819
sp|Q6P5Z2|PKN3_HUMAN@840			sp|Q9Y2J2|E41L3_HUMAN@140			sp|P51587|BRCA2_HUMAN@419
sp|Q8IXM2|BAP18_HUMAN@66			sp|O75147|OBSL1_HUMAN@581			sp|O94986|CE152_HUMAN@653
sp|P62745|RHOB_HUMAN@159			sp|Q96CX2|KCD12_HUMAN@50			sp|Q9NZQ3|SPN90_HUMAN@376
sp|Q02952|AKA12_HUMAN@1479			sp|Q8NI60|COQ8A_HUMAN@641			sp|Q96QE3|ATAD5_HUMAN@1529
sp|P49454|CENPF_HUMAN@76			sp|Q16643|DREB_HUMAN@308			sp|Q14674|ESPL1_HUMAN@746
sp|Q9BTA9|WAC_HUMAN@615			sp|Q9Y6K9|NEMO_HUMAN@347			sp|Q7L014|DDX46_HUMAN@646
sp|Q3SY69|AL1L2_HUMAN@707			sp|Q9BTC0|DIDO1_HUMAN@498			sp|Q8N5W9|RFLB_HUMAN@81
sp|Q9H902|REEP1_HUMAN@106			sp|Q99996|AKAP9_HUMAN@1367			sp|O75132|ZBED4_HUMAN@326
sp|Q9Y520|PRC2C_HUMAN@895			sp|O75153|CLU_HUMAN@200			sp|Q8N5I9|NOPC1_HUMAN@13
sp|Q9UK61|TASOR_HUMAN@690			sp|Q5TEU4|NDUF5_HUMAN@98			sp|Q13219|PAPP1_HUMAN@713
sp|Q96EK5|KBP_HUMAN@231			sp|P53041|PPP5_HUMAN@77			sp|P55060|XPO2_HUMAN@842
sp|Q99700|ATX2_HUMAN@301			sp|Q99536|VAT1_HUMAN@86			sp|Q9NT62|ATG3_HUMAN@182
sp|O43683|BUB1_HUMAN@201			sp|O75122|CLAP2_HUMAN@662			sp|Q92794|KAT6A_HUMAN@508
sp|A1L0T0|HACL2_HUMAN@276			sp|P28340|DPOD1_HUMAN@360			sp|O75153|CLU_HUMAN@753
sp|Q92945|FUBP2_HUMAN@176			sp|P28161|GSTM2_HUMAN@174			sp|Q9UHV5|RPGFL_HUMAN@506
sp|Q69YL0|NCAS2_HUMAN@63			sp|P35226|BMI1_HUMAN@231			sp|Q14974|IMB1_HUMAN@765
sp|Q8WXG6|MADD_HUMAN@1489			sp|O14686|KMT2D_HUMAN@414			sp|O15235|RT12_HUMAN@93
sp|Q5T6F2|UBAP2_HUMAN@208			sp|Q92538|GBF1_HUMAN@1111			sp|Q96IV0|NGLY1_HUMAN@253
sp|P07948|LYN_HUMAN@468			sp|Q86XZ4|SPAS2_HUMAN@61			sp|P20073|ANXA7_HUMAN@413
sp|Q9Y5X3|SNX5_HUMAN@250			sp|P49207|RL34_HUMAN@83			sp|Q9H3U1|UN45A_HUMAN@118
sp|P23588|IF4B_HUMAN@457			sp|P52732|KIF11_HUMAN@734			sp|Q9H840|GEMI7_HUMAN@44
sp|P21580|TNAP3_HUMAN@590			sp|Q14247|SRC8_HUMAN@246			sp|Q9H845|ACAD9_HUMAN@327
sp|Q7L0Y3|TM10C_HUMAN@123			sp|Q13613|MTMR1_HUMAN@58			sp|Q9BY41|HDAC8_HUMAN@153
sp|Q9NRL2|BAZ1A_HUMAN@537			sp|Q53GS7|GLE1_HUMAN@528			sp|Q96R06|SPAG5_HUMAN@704
sp|Q5T3J3|LRIF1_HUMAN@524			sp|Q9C0C9|UBE2O_HUMAN@1040			sp|Q14690|RRP5_HUMAN@333
sp|Q6QNY1|BL1S2_HUMAN@41			sp|P50749|RASF2_HUMAN@251			sp|Q9BUB5|MKNK1_HUMAN@440
sp|Q12986|NFX1_HUMAN@661			sp|Q9H0B6|KLC2_HUMAN@474			sp|Q8IXI1|MIRO2_HUMAN@216
sp|P49419|AL7A1_HUMAN@522			sp|Q7L2E3|DHX30_HUMAN@786			sp|P46013|KI67_HUMAN@824
sp|Q96N21|AP4AT_HUMAN@52			sp|P10155|RO60_HUMAN@38			sp|Q99741|CDC6_HUMAN@394
sp|Q9Y5L0|TNPO3_HUMAN@125			sp|P04844|RPN2_HUMAN@72			sp|P16615|AT2A2_HUMAN@875
sp|Q9H6U6|BCAS3_HUMAN@479			sp|P30153|2AAA_HUMAN@390			sp|Q96J01|THOC3_HUMAN@25
sp|Q13155|AIMP2_HUMAN@168			sp|P08247|SYPH_HUMAN@190			sp|Q92564|DCNL4_HUMAN@219
sp|P28331|NDUS1_HUMAN@367			sp|Q9BUJ2|HNRL1_HUMAN@377			sp|A7E2V4|ZSWM8_HUMAN@507
sp|Q9BQ52|RNZ2_HUMAN@136			sp|Q9BYG5|PAR6B_HUMAN@13			sp|O15360|FANCA_HUMAN@465
sp|Q9Y490|TLN1_HUMAN@1353			sp|Q01814|AT2B2_HUMAN@756			sp|Q9H582|ZN644_HUMAN@1206
sp|Q9NRH3|TBG2_HUMAN@201			sp|Q15054|DPOD3_HUMAN@137			sp|Q9Y679|AUP1_HUMAN@70
sp|P62937|PPIA_HUMAN@52			sp|Q9Y265|RUVB1_HUMAN@94			sp|O75832|PSD10_HUMAN@180
sp|Q14202|ZMYM3_HUMAN@1048			sp|Q96EP0|RNF31_HUMAN@473			sp|Q9BRK4|LZTS2_HUMAN@376
sp|O14727|APAF_HUMAN@258			sp|Q8IZL8|PELP1_HUMAN@645			sp|Q5SRE5|NU188_HUMAN@1283
sp|Q9Y4C8|RBM19_HUMAN@293			sp|O15111|IKKA_HUMAN@30			sp|Q92575|UBXN4_HUMAN@144
sp|Q86VP6|CAND1_HUMAN@131			sp|Q9NVR2|INT10_HUMAN@122			sp|O75521|ECI2_HUMAN@282
sp|O60518|RNBP6_HUMAN@188			sp|Q9P287|BCCIP_HUMAN@275			sp|O75962|TRIO_HUMAN@1207
sp|Q9H8V3|ECT2_HUMAN@796			sp|Q5W0B1|OBI1_HUMAN@65			sp|O75475|PSIP1_HUMAN@204
sp|Q7L576|CYFP1_HUMAN@993			sp|Q13905|RPGF1_HUMAN@817			sp|Q9Y6J9|TAF6L_HUMAN@122
sp|Q9GZR2|REXO4_HUMAN@418			sp|P13591|NCAM1_HUMAN@829			sp|Q7KZF4|SND1_HUMAN@96
sp|O00429|DNM1L_HUMAN@345			sp|Q9Y3T9|NOC2L_HUMAN@567			sp|Q8WYQ5|DGCR8_HUMAN@128
sp|Q8N972|ZN709_HUMAN@515			sp|Q5VST6|AB17B_HUMAN@210			sp|Q86VI3|IQGA3_HUMAN@1411
sp|Q9BT17|MTG1_HUMAN@262			sp|Q9C0C2|TB182_HUMAN@1175			sp|Q9NXF1|TEX10_HUMAN@640
sp|Q9HC35|EMAL4_HUMAN@311			sp|P57721|PCBP3_HUMAN@195			sp|Q8NB90|AFG2A_HUMAN@27
sp|Q14703|MBTP1_HUMAN@927			sp|O14556|G3PT_HUMAN@319			sp|Q6P2E9|EDC4_HUMAN@976
sp|Q9BQG0|MBB1A_HUMAN@1046			sp|O14686|KMT2D_HUMAN@2249			sp|Q9NYU1|UGGG2_HUMAN@1002
sp|Q96IY1|NSL1_HUMAN@224			sp|Q15813|TBCE_HUMAN@152			sp|P61081|UBC12_HUMAN@65
sp|Q93034|CUL5_HUMAN@188			sp|Q99614|TTC1_HUMAN@28			sp|P13861|KAP2_HUMAN@359
sp|Q8NG31|KNL1_HUMAN@1847			sp|P30048|PRDX3_HUMAN@60			sp|P37268|FDFT_HUMAN@6
sp|P15735|PHKG2_HUMAN@188			sp|Q9Y4A5|TRRAP_HUMAN@2876			sp|O75792|RNH2A_HUMAN@29
sp|P56589|PEX3_HUMAN@65			sp|P54098|DPOG1_HUMAN@660			sp|P00441|SODC_HUMAN@147
sp|Q8WUM4|PDC6I_HUMAN@691			sp|Q9BVA1|TBB2B_HUMAN@239			sp|Q86VI3|IQGA3_HUMAN@35
sp|O95297|MPZL1_HUMAN@203			sp|P33992|MCM5_HUMAN@397			sp|Q14966|ZN638_HUMAN@747
sp|Q13615|MTMR3_HUMAN@867			sp|P04075|ALDOA_HUMAN@202			sp|Q9NXW9|ALKB4_HUMAN@267
sp|Q6P2E9|EDC4_HUMAN@838			sp|Q9H6H4|REEP4_HUMAN@200			sp|Q9UI12|VATH_HUMAN@85
sp|P08243|ASNS_HUMAN@255			sp|Q9Y314|NOSIP_HUMAN@8			sp|P12814|ACTN1_HUMAN@41
sp|Q8JUX5|POLS_CHIKS@545			sp|Q92973|TNPO1_HUMAN@467			sp|Q53R41|FAKD1_HUMAN@300
sp|Q8TC07|TBC15_HUMAN@605			sp|O60879|DIAP2_HUMAN@484			sp|P13010|XRCC5_HUMAN@493
sp|O14980|XPO1_HUMAN@528			sp|P25098|ARBK1_HUMAN@340			sp|Q02224|CENPE_HUMAN@2626
sp|Q6ZNB6|NFXL1_HUMAN@827			sp|P07237|PDIA1_HUMAN@312			sp|P12236|ADT3_HUMAN@57
sp|P55769|NH2L1_HUMAN@102			sp|Q12931|TRAP1_HUMAN@501			sp|O00154|BACH_HUMAN@288
sp|Q5T3I0|GPTC4_HUMAN@333			sp|O14617|AP3D1_HUMAN@208			sp|P14868|SYDC_HUMAN@334
sp|Q9UHB9|SRP68_HUMAN@344			sp|Q1KMD3|HNRL2_HUMAN@518			sp|P98194|AT2C1_HUMAN@162
sp|P54098|DPOG1_HUMAN@647			sp|Q92888|ARHG1_HUMAN@911			sp|P49588|SYAC_HUMAN@671
sp|P03243|E1B55_ADE05@483			sp|Q14674|ESPL1_HUMAN@1090			sp|Q9UKU7|ACAD8_HUMAN@251
sp|Q8IX15|HOMEZ_HUMAN@273			sp|P12236|ADT3_HUMAN@160			sp|Q9UPV9|TRAK1_HUMAN@713
sp|O60306|AQR_HUMAN@1245			sp|Q9HAV4|XPO5_HUMAN@977			sp|Q6RFH5|WDR74_HUMAN@134
sp|Q9UGN5|PARP2_HUMAN@474			sp|O43264|ZW10_HUMAN@404			sp|P35520|CBS_HUMAN@15
sp|P29374|ARI4A_HUMAN@849			sp|Q96ME7|ZN512_HUMAN@540			sp|Q92618|ZN516_HUMAN@1016
sp|O75044|SRGP2_HUMAN@820			sp|Q9P0U4|CXXC1_HUMAN@420			sp|P34913|HYES_HUMAN@141
sp|Q15366|PCBP2_HUMAN@158			sp|Q9HB09|B2L12_HUMAN@155			sp|O43772|MCAT_HUMAN@136
sp|P24941|CDK2_HUMAN@177			sp|Q9Y696|CLIC4_HUMAN@35			sp|Q96H55|MYO19_HUMAN@378
sp|Q96JN8|NEUL4_HUMAN@1324			sp|Q8N201|INT1_HUMAN@358			sp|Q49AR2|CE022_HUMAN@195
sp|P55263|ADK_HUMAN@353			sp|Q3SXY8|AR13B_HUMAN@146			sp|P07858|CATB_HUMAN@211
sp|Q15527|SURF2_HUMAN@127			sp|Q9H0A0|NAT10_HUMAN@746			sp|O15020|SPTN2_HUMAN@1140
sp|Q96EK7|F120B_HUMAN@511			sp|Q92665|RT31_HUMAN@356			sp|Q5T481|RBM20_HUMAN@1163
sp|P11766|ADHX_HUMAN@111			sp|P12235|ADT1_HUMAN@257			sp|P41252|SYIC_HUMAN@185
sp|Q86U44|MTA70_HUMAN@500			sp|Q12906|ILF3_HUMAN@295			sp|Q92974|ARHG2_HUMAN@342
sp|Q86UT6|NLRX1_HUMAN@481			sp|O95453|PARN_HUMAN@317			sp|Q3SXM5|HSDL1_HUMAN@265
sp|Q92598|HS105_HUMAN@650			sp|Q9HAD4|WDR41_HUMAN@317			sp|P49327|FAS_HUMAN@779
sp|Q8WUK0|PTPM1_HUMAN@81			sp|P52789|HXK2_HUMAN@386			sp|P29992|GNA11_HUMAN@144
sp|P25116|PAR1_HUMAN@411			sp|Q9BPX3|CND3_HUMAN@119			sp|Q6IQ22|RAB12_HUMAN@183
sp|Q9Y450|HBS1L_HUMAN@504			sp|Q3SY69|AL1L2_HUMAN@728			sp|Q13882|PTK6_HUMAN@82
sp|Q9C0H5|RHG39_HUMAN@368			sp|Q6UVJ0|SAS6_HUMAN@444			sp|Q96AC1|FERM2_HUMAN@520
sp|Q9NVN8|GNL3L_HUMAN@322			sp|Q9Y5G0|PCDGH_HUMAN@30			sp|Q8WU20|FRS2_HUMAN@415
sp|O43491|E41L2_HUMAN@424			sp|P50213|IDH3A_HUMAN@359			sp|O94782|UBP1_HUMAN@356
sp|P21439|MDR3_HUMAN@1073			sp|P35520|CBS_HUMAN@370			sp|Q9UQ35|SRRM2_HUMAN@891
sp|Q9Y6K1|DNM3A_HUMAN@666			sp|P13489|RINI_HUMAN@12			sp|Q6IE81|JADE1_HUMAN@328
sp|Q96Q42|ALS2_HUMAN@664			sp|Q96AQ9|F131C_HUMAN@4			sp|Q9NR09|BIRC6_HUMAN@1336
sp|O75369|FLNB_HUMAN@1326			sp|Q93008|USP9X_HUMAN@692			sp|O43264|ZW10_HUMAN@650
sp|Q9UPN4|CP131_HUMAN@159			sp|Q9Y6R4|M3K4_HUMAN@326			sp|Q9ULG1|INO80_HUMAN@1049
sp|P46100|ATRX_HUMAN@450			sp|P26358|DNMT1_HUMAN@1125			sp|Q8IVH4|MMAA_HUMAN@184
sp|P61026|RAB10_HUMAN@24			sp|Q9Y2Z2|MTO1_HUMAN@315			sp|Q9HAS0|NJMU_HUMAN@153
sp|Q1KMD3|HNRL2_HUMAN@293			sp|Q9P2Y5|UVRAG_HUMAN@239			sp|Q9BVP2|GNL3_HUMAN@234
sp|P17509|HXB6_HUMAN@72			sp|Q12906|ILF3_HUMAN@116			sp|P62195|PRS8_HUMAN@209
sp|Q76FK4|NOL8_HUMAN@259			sp|P68363|TBA1B_HUMAN@347			sp|Q9UJX6|ANC2_HUMAN@179
sp|P35914|HMGCL_HUMAN@307			sp|Q9Y276|BCS1_HUMAN@234			sp|Q8NF91|SYNE1_HUMAN@8380
sp|Q6PCE3|PGM2L_HUMAN@303			sp|O14503|BHE40_HUMAN@13			sp|Q16531|DDB1_HUMAN@378
sp|Q8WUY9|DEP1B_HUMAN@169			sp|Q6VN20|RBP10_HUMAN@243			sp|Q6P2I3|FAH2B_HUMAN@301
sp|Q7L590|MCM10_HUMAN@246			sp|Q9UGP8|SEC63_HUMAN@295			sp|O75140|DEPD5_HUMAN@952
sp|Q96KP1|EXOC2_HUMAN@373			sp|Q92878|RAD50_HUMAN@157			sp|Q6UXN9|WDR82_HUMAN@141
sp|P34932|HSP74_HUMAN@146			sp|Q9P0U4|CXXC1_HUMAN@531			sp|P31930|QCR1_HUMAN@380
sp|Q9Y3I0|RTCB_HUMAN@295			sp|P52789|HXK2_HUMAN@517			sp|O75376|NCOR1_HUMAN@994
sp|Q92793|CBP_HUMAN@1219			sp|Q12968|NFAC3_HUMAN@358			sp|Q9P253|VPS18_HUMAN@421
sp|P49406|RM19_HUMAN@248			sp|O15020|SPTN2_HUMAN@1843			sp|Q96T88|UHRF1_HUMAN@410
[truncated: 13,528 more rows]

## Sheet: NHS
set1		set2		set3
sp|Leading Ac|Genename@Site		sp|Leading Ac|Genename@Site		sp|Leading Ac|Genename@Site
sp|O43491|E41L2_HUMAN@13		sp|O43395|PRPF3_HUMAN@495		sp|Q8IX12|CCAR1_HUMAN@1130
sp|P35520|CBS_HUMAN@75		sp|O95347|SMC2_HUMAN@911		sp|O43395|PRPF3_HUMAN@495
sp|Q07955|SRSF1_HUMAN@174		sp|P53041|PPP5_HUMAN@232		sp|Q7Z4N2|TRPM1_HUMAN@875
sp|Q99733|NP1L4_HUMAN@26		sp|O43491|E41L2_HUMAN@13		sp|Q13162|PRDX4_HUMAN@250
sp|Q4KMP7|TB10B_HUMAN@168		sp|P35520|CBS_HUMAN@75		sp|O95347|SMC2_HUMAN@911
sp|Q96T37|RBM15_HUMAN@762		sp|Q9Y490|TLN1_HUMAN@861		sp|Q9Y5B9|SP16H_HUMAN@647
sp|P18754|RCC1_HUMAN@335		sp|P39023|RL3_HUMAN@124		sp|Q9Y2W2|WBP11_HUMAN@590
sp|P31948|STIP1_HUMAN@50		sp|O95347|SMC2_HUMAN@580		sp|Q9NYF8|BCLF1_HUMAN@457
sp|Q13442|HAP28_HUMAN@31		sp|P42704|LPPRC_HUMAN@772		sp|O43491|E41L2_HUMAN@13
sp|Q15691|MARE1_HUMAN@89		sp|P42345|MTOR_HUMAN@2066		sp|P35520|CBS_HUMAN@75
sp|P62906|RL10A_HUMAN@106		sp|P46977|STT3A_HUMAN@440		sp|Q13435|SF3B2_HUMAN@529
sp|P22102|PUR2_HUMAN@964		sp|Q86UP2|KTN1_HUMAN@465		sp|Q9Y490|TLN1_HUMAN@861
sp|Q9Y2Z0|SGT1_HUMAN@194		sp|P18754|RCC1_HUMAN@335		sp|Q9H074|PAIP1_HUMAN@335
sp|P46779|RL28_HUMAN@22		sp|P31948|STIP1_HUMAN@50		sp|P35659|DEK_HUMAN@367
REV_sp|Q9UFH2|DYH17_HUMAN@637		sp|Q16891|MIC60_HUMAN@321		sp|P18031|PTN1_HUMAN@36
sp|Q3SY69|AL1L2_HUMAN@227		sp|Q13442|HAP28_HUMAN@31		sp|Q07955|SRSF1_HUMAN@174
sp|Q15283|RASA2_HUMAN@419		sp|Q15691|MARE1_HUMAN@89		sp|Q99733|NP1L4_HUMAN@26
sp|P46821|MAP1B_HUMAN@531		sp|P10644|KAP0_HUMAN@70		sp|Q9Y490|TLN1_HUMAN@2361
sp|P78347|GTF2I_HUMAN@130		sp|P62906|RL10A_HUMAN@106		sp|Q4KMP7|TB10B_HUMAN@168
sp|P27694|RFA1_HUMAN@183		sp|P39019|RS19_HUMAN@23		sp|O95347|SMC2_HUMAN@580
sp|P05091|ALDH2_HUMAN@368		sp|P22102|PUR2_HUMAN@964		sp|P42704|LPPRC_HUMAN@772
sp|P40926|MDHM_HUMAN@301		sp|Q9Y2Z0|SGT1_HUMAN@194		sp|P42345|MTOR_HUMAN@2066
sp|P07814|SYEP_HUMAN@180		sp|P46779|RL28_HUMAN@22		sp|P46977|STT3A_HUMAN@440
sp|Q9UNY4|TTF2_HUMAN@403		sp|Q9Y277|VDAC3_HUMAN@110		sp|Q6P1J9|CDC73_HUMAN@188
sp|O94826|TOM70_HUMAN@118		sp|P55884|EIF3B_HUMAN@257		sp|Q8TAT6|NPL4_HUMAN@16
sp|P46087|NOP2_HUMAN@757		sp|Q3SY69|AL1L2_HUMAN@227		sp|Q86UP2|KTN1_HUMAN@465
sp|Q9Y6A5|TACC3_HUMAN@694		sp|Q53S08|RAB6D_HUMAN@164		sp|P18754|RCC1_HUMAN@335
sp|Q16881|TRXR1_HUMAN@296		sp|Q6P2E9|EDC4_HUMAN@119		sp|O75521|ECI2_HUMAN@304
sp|P46779|RL28_HUMAN@47		sp|Q9UNS2|CSN3_HUMAN@125		sp|O95782|AP2A1_HUMAN@403
sp|Q86UP2|KTN1_HUMAN@150		sp|P61247|RS3A_HUMAN@152		sp|Q96AG4|LRC59_HUMAN@116
sp|P05023|AT1A1_HUMAN@773		sp|P46013|KI67_HUMAN@2043		sp|P78527|PRKDC_HUMAN@329
sp|Q92747|ARC1A_HUMAN@290		sp|Q15029|U5S1_HUMAN@196		sp|Q16891|MIC60_HUMAN@321
sp|P62258|1433E_HUMAN@12		sp|P46821|MAP1B_HUMAN@531		sp|Q13442|HAP28_HUMAN@31
sp|P07197|NFM_HUMAN@314		sp|P78347|GTF2I_HUMAN@130		sp|Q15691|MARE1_HUMAN@89
sp|P57772|SELB_HUMAN@332		sp|P27694|RFA1_HUMAN@183		sp|P10644|KAP0_HUMAN@70
sp|P02545|LMNA_HUMAN@233		sp|Q8WVM8|SCFD1_HUMAN@541		sp|P39019|RS19_HUMAN@23
sp|P78527|PRKDC_HUMAN@828		sp|P05091|ALDH2_HUMAN@368		sp|P62906|RL10A_HUMAN@106
sp|Q9BQG0|MBB1A_HUMAN@1231		sp|Q9BQE3|TBA1C_HUMAN@401		sp|O00330|ODPX_HUMAN@379
sp|Q9Y4E8|UBP15_HUMAN@154		sp|P55884|EIF3B_HUMAN@762		sp|Q6PJT7|ZC3HE_HUMAN@99
sp|P27708|PYR1_HUMAN@1325		sp|P61758|PFD3_HUMAN@185		sp|Q9Y2Z0|SGT1_HUMAN@194
sp|P35659|DEK_HUMAN@278		sp|P40926|MDHM_HUMAN@301		sp|Q15393|SF3B3_HUMAN@974
sp|P51659|DHB4_HUMAN@674		sp|P55809|SCOT1_HUMAN@41		sp|Q00169|PIPNA_HUMAN@116
sp|O75643|U520_HUMAN@1049		sp|P07814|SYEP_HUMAN@180		sp|P22102|PUR2_HUMAN@964
sp|Q15233|NONO_HUMAN@290		sp|O95785|WIZ_HUMAN@1372		sp|O14818|PSA7_HUMAN@28
sp|Q9UBE0|SAE1_HUMAN@183		sp|P04843|RPN1_HUMAN@524		sp|P46779|RL28_HUMAN@22
sp|P07355|ANXA2_HUMAN@204		sp|O94826|TOM70_HUMAN@118		REV_sp|Q9UFH2|DYH17_HUMAN@637
sp|P35998|PRS7_HUMAN@340		sp|P46087|NOP2_HUMAN@757		sp|Q9BS26|ERP44_HUMAN@345
sp|O43175|SERA_HUMAN@33		sp|Q8N0Z6|TTC5_HUMAN@87		sp|P55884|EIF3B_HUMAN@257
sp|P31948|STIP1_HUMAN@229		sp|Q16881|TRXR1_HUMAN@296		sp|Q9Y2W1|TR150_HUMAN@387
sp|P53990|IST1_HUMAN@35		sp|P27824|CALX_HUMAN@103		sp|O43865|SAHH2_HUMAN@478
sp|P54136|SYRC_HUMAN@306		sp|P14866|HNRPL_HUMAN@269		sp|P24928|RPB1_HUMAN@1859
sp|Q08752|PPID_HUMAN@257		sp|P46779|RL28_HUMAN@47		sp|P04040|CATA_HUMAN@476
sp|P25685|DNJB1_HUMAN@306		sp|Q99961|SH3G1_HUMAN@177		sp|Q92922|SMRC1_HUMAN@856
sp|Q92900|RENT1_HUMAN@790		sp|P52732|KIF11_HUMAN@15		sp|Q15233|NONO_HUMAN@109
sp|P50914|RL14_HUMAN@171		sp|Q86UP2|KTN1_HUMAN@150		sp|Q13823|NOG2_HUMAN@402
sp|Q14694|UBP10_HUMAN@780		sp|P41250|GARS_HUMAN@477		sp|O00567|NOP56_HUMAN@478
sp|Q92878|RAD50_HUMAN@938		sp|O95347|SMC2_HUMAN@417		sp|P36404|ARL2_HUMAN@8
sp|Q05682|CALD1_HUMAN@693		sp|P51572|BAP31_HUMAN@221		sp|P46379|BAG6_HUMAN@1031
sp|O43818|U3IP2_HUMAN@125		sp|Q12769|NU160_HUMAN@1425		sp|P24752|THIL_HUMAN@302
sp|Q06830|PRDX1_HUMAN@190		sp|P05023|AT1A1_HUMAN@773		sp|Q3SY69|AL1L2_HUMAN@227
sp|Q9NR30|DDX21_HUMAN@61		sp|P62258|1433E_HUMAN@12		sp|P55884|EIF3B_HUMAN@202
sp|Q9BQG0|MBB1A_HUMAN@125		sp|P07197|NFM_HUMAN@314		sp|Q6P587|FAHD1_HUMAN@194
sp|P63261|ACTG_HUMAN@61		sp|Q9IH62|GLYCP_NIPAV@322		sp|Q53S08|RAB6D_HUMAN@164
sp|Q96PK6|RBM14_HUMAN@164		sp|Q9NR12|PDLI7_HUMAN@238		sp|Q92599|SEPT8_HUMAN@374
sp|P10412|H14_HUMAN@186		sp|P02545|LMNA_HUMAN@233		sp|Q9UNS2|CSN3_HUMAN@125
sp|P63162|RSMN_HUMAN@88		sp|Q9BQG0|MBB1A_HUMAN@1231		sp|Q6P2E9|EDC4_HUMAN@119
sp|P25398|RS12_HUMAN@121		sp|P54727|RD23B_HUMAN@60		sp|P61247|RS3A_HUMAN@152
sp|P28370|SMCA1_HUMAN@59		sp|P36873|PP1G_HUMAN@260		sp|O76021|RL1D1_HUMAN@136
sp|P04040|CATA_HUMAN@23		REV_sp|P82933|RT09_HUMAN@338		sp|Q7Z7K6|CENPV_HUMAN@270
sp|Q92945|FUBP2_HUMAN@346		sp|P12270|TPR_HUMAN@877		sp|Q15029|U5S1_HUMAN@196
sp|P13639|EF2_HUMAN@239		sp|P51659|DHB4_HUMAN@674		sp|P46821|MAP1B_HUMAN@531
sp|P25440|BRD2_HUMAN@760		sp|P29692|EF1D_HUMAN@17		sp|P78527|PRKDC_HUMAN@3825
sp|P27635|RL10_HUMAN@169		sp|O75643|U520_HUMAN@1049		sp|P78347|GTF2I_HUMAN@130
sp|Q9UQ35|SRRM2_HUMAN@1095		sp|P63241|IF5A1_HUMAN@34		sp|Q8WVM8|SCFD1_HUMAN@541
sp|O60716|CTND1_HUMAN@846		sp|Q15147|PLCB4_HUMAN@461		sp|P27694|RFA1_HUMAN@183
sp|P16949|STMN1_HUMAN@85		REV_sp|Q9H2M9|RBGPR_HUMAN@803		sp|P48047|ATPO_HUMAN@26
sp|P39023|RL3_HUMAN@362		sp|P07355|ANXA2_HUMAN@204		sp|Q96RN5|MED15_HUMAN@72
sp|Q86VM9|ZCH18_HUMAN@510		sp|P35998|PRS7_HUMAN@340		sp|P82650|RT22_HUMAN@127
sp|Q9HC38|GLOD4_HUMAN@239		sp|O43175|SERA_HUMAN@33		sp|P14625|ENPL_HUMAN@479
sp|Q00325|S25A3_HUMAN@304		sp|O60678|ANM3_HUMAN@255		sp|P05091|ALDH2_HUMAN@368
sp|Q9Y570|PPME1_HUMAN@121		sp|Q9H4A4|AMPB_HUMAN@555		sp|P15924|DESP_HUMAN@1840
sp|P05141|ADT2_HUMAN@147		sp|P0DTD1|R1AB_SARS2@4783		sp|P61758|PFD3_HUMAN@185
sp|P23526|SAHH_HUMAN@322		sp|P31948|STIP1_HUMAN@229		sp|P49588|SYAC_HUMAN@338
sp|Q14839|CHD4_HUMAN@1778		sp|P53990|IST1_HUMAN@35		sp|P40926|MDHM_HUMAN@301
sp|Q14157|UBP2L_HUMAN@484		sp|P09874|PARP1_HUMAN@221		sp|P55809|SCOT1_HUMAN@41
sp|Q9BQ75|CMS1_HUMAN@84		sp|P54136|SYRC_HUMAN@306		sp|Q32P28|P3H1_HUMAN@512
sp|Q15233|NONO_HUMAN@239		sp|P13667|PDIA4_HUMAN@576		sp|P04843|RPN1_HUMAN@524
sp|P47756|CAPZB_HUMAN@235		sp|Q92665|RT31_HUMAN@343		sp|P46087|NOP2_HUMAN@757
REV_sp|Q8NCM8|DYHC2_HUMAN@1707		sp|Q08752|PPID_HUMAN@257		sp|Q07065|CKAP4_HUMAN@332
sp|O43242|PSMD3_HUMAN@186		sp|P50454|SERPH_HUMAN@39		sp|Q9UHB9|SRP68_HUMAN@360
sp|Q06830|PRDX1_HUMAN@93		sp|P25685|DNJB1_HUMAN@306		sp|Q16881|TRXR1_HUMAN@296
sp|P09874|PARP1_HUMAN@394		sp|O95067|CCNB2_HUMAN@353		sp|P14866|HNRPL_HUMAN@269
sp|P16401|H15_HUMAN@93		sp|Q96CW1|AP2M1_HUMAN@405		sp|P46779|RL28_HUMAN@47
sp|P49005|DPOD2_HUMAN@267		sp|Q92900|RENT1_HUMAN@790		sp|Q5T280|CI114_HUMAN@240
sp|Q07666|KHDR1_HUMAN@424		sp|Q9BUR5|MIC26_HUMAN@32		sp|Q96EY4|TMA16_HUMAN@36
sp|Q15075|EEA1_HUMAN@192		sp|Q14694|UBP10_HUMAN@780		sp|P52732|KIF11_HUMAN@15
sp|O00151|PDLI1_HUMAN@329		sp|P12270|TPR_HUMAN@1420		sp|Q86UP2|KTN1_HUMAN@150
sp|P48047|ATPO_HUMAN@54		sp|P03243|E1B55_ADE05@190		sp|P41250|GARS_HUMAN@477
sp|Q9NX76|CKLF6_HUMAN@101		sp|Q05682|CALD1_HUMAN@693		sp|P00367|DHE3_HUMAN@545
sp|Q14151|SAFB2_HUMAN@437		sp|O43818|U3IP2_HUMAN@125		sp|P55036|PSMD4_HUMAN@74
sp|P05141|ADT2_HUMAN@166		sp|Q7L014|DDX46_HUMAN@271		sp|P05023|AT1A1_HUMAN@773
sp|P27544|CERS1_HUMAN@332		sp|Q06830|PRDX1_HUMAN@190		sp|Q9BXK5|B2L13_HUMAN@116
sp|Q13428|TCOF_HUMAN@379		sp|Q9NR30|DDX21_HUMAN@61		sp|Q92747|ARC1A_HUMAN@290
sp|O60869|EDF1_HUMAN@143		sp|Q92598|HS105_HUMAN@786		sp|O75400|PR40A_HUMAN@191
sp|Q9UMS4|PRP19_HUMAN@266		sp|Q5TBB1|RNH2B_HUMAN@247		sp|Q5T9L3|WLS_HUMAN@208
sp|Q9NW13|RBM28_HUMAN@505		sp|Q9BQG0|MBB1A_HUMAN@125		sp|Q9Y2J2|E41L3_HUMAN@266
sp|P19338|NUCL_HUMAN@521		sp|P63261|ACTG_HUMAN@61		sp|P62258|1433E_HUMAN@12
sp|O00151|PDLI1_HUMAN@246		sp|Q96PK6|RBM14_HUMAN@164		sp|P07197|NFM_HUMAN@314
sp|Q9Y490|TLN1_HUMAN@1544		sp|O60231|DHX16_HUMAN@73		sp|P50454|SERPH_HUMAN@252
sp|Q07021|C1QBP_HUMAN@123		sp|P10412|H14_HUMAN@186		sp|P57772|SELB_HUMAN@332
sp|Q8ND61|CC020_HUMAN@805		REV_sp|Q92616|GCN1_HUMAN@713		sp|Q9Y6V7|DDX49_HUMAN@120
sp|Q9NSD9|SYFB_HUMAN@97		sp|O75534|CSDE1_HUMAN@517		REV_sp|O75969|AKAP3_HUMAN@635
sp|P24539|AT5F1_HUMAN@139		sp|P25398|RS12_HUMAN@121		sp|Q00597|FANCC_HUMAN@552
sp|Q15397|PUM3_HUMAN@33		REV_sp|P23074|POL_SFV1@1080		sp|Q6DKK2|TTC19_HUMAN@352
sp|O94979|SC31A_HUMAN@1142		sp|Q92945|FUBP2_HUMAN@346		sp|P42704|LPPRC_HUMAN@1098
sp|P49588|SYAC_HUMAN@934		sp|P13639|EF2_HUMAN@239		REV_sp|P02549|SPTA1_HUMAN@615
sp|Q9UNH7|SNX6_HUMAN@225		sp|O75937|DNJC8_HUMAN@135		sp|Q7Z3U7|MON2_HUMAN@1218
sp|Q14008|CKAP5_HUMAN@96		sp|O95400|CD2B2_HUMAN@26		sp|A8MXV4|NUD19_HUMAN@361
sp|O95292|VAPB_HUMAN@200		sp|Q4VCS5|AMOT_HUMAN@156		sp|P02545|LMNA_HUMAN@233
sp|Q9NZI8|IF2B1_HUMAN@450		sp|O60716|CTND1_HUMAN@846		sp|P78527|PRKDC_HUMAN@828
sp|Q99829|CPNE1_HUMAN@182		sp|P16949|STMN1_HUMAN@85		sp|P11388|TOP2A_HUMAN@1240
sp|O75947|ATP5H_HUMAN@95		sp|O00232|PSD12_HUMAN@36		sp|Q9Y3C6|PPIL1_HUMAN@52
sp|P27695|APEX1_HUMAN@35		sp|P39023|RL3_HUMAN@362		sp|Q9BQG0|MBB1A_HUMAN@1231
sp|Q9P2E9|RRBP1_HUMAN@588		sp|Q86VM9|ZCH18_HUMAN@510		sp|P62910|RL32_HUMAN@50
sp|P49419|AL7A1_HUMAN@537		sp|Q00341|VIGLN_HUMAN@477		sp|P54727|RD23B_HUMAN@60
REV_sp|Q9H222|ABCG5_HUMAN@582		sp|P17980|PRS6A_HUMAN@276		sp|Q86VI3|IQGA3_HUMAN@907
sp|P33992|MCM5_HUMAN@392		sp|Q9HC38|GLOD4_HUMAN@239		sp|P08133|ANXA6_HUMAN@314
sp|Q9UQE7|SMC3_HUMAN@140		sp|P15311|EZRI_HUMAN@143		sp|O14974|MYPT1_HUMAN@294
sp|Q9BVP2|GNL3_HUMAN@211		sp|P08133|ANXA6_HUMAN@9		sp|P08237|PFKAM_HUMAN@738
REV_sp|Q8WZ42|TITIN_HUMAN@28176		sp|Q00325|S25A3_HUMAN@304		sp|P54577|SYYC_HUMAN@380
sp|P07195|LDHB_HUMAN@318		sp|B5MCY1|TDR15_HUMAN@30		sp|P41240|CSK_HUMAN@196
sp|P34897|GLYM_HUMAN@297		sp|Q9P2J5|SYLC_HUMAN@970		sp|Q92841|DDX17_HUMAN@156
sp|P30048|PRDX3_HUMAN@83		sp|Q9P2J5|SYLC_HUMAN@1112		REV_sp|P82933|RT09_HUMAN@338
sp|P63104|1433Z_HUMAN@68		sp|P05141|ADT2_HUMAN@147		sp|P27708|PYR1_HUMAN@1325
sp|P07197|NFM_HUMAN@671		sp|P23526|SAHH_HUMAN@322		sp|Q9NS73|MBIP1_HUMAN@325
sp|P09429|HMGB1_HUMAN@172		sp|Q7Z4V5|HDGR2_HUMAN@439		sp|Q9Y4E8|UBP15_HUMAN@154
sp|P02545|LMNA_HUMAN@135		sp|Q14839|CHD4_HUMAN@1778		sp|P35659|DEK_HUMAN@278
sp|P35269|T2FA_HUMAN@435		sp|Q9BQ75|CMS1_HUMAN@84		sp|P12270|TPR_HUMAN@877
sp|P00491|PNPH_HUMAN@211		sp|P15924|DESP_HUMAN@1789		sp|Q9H078|CLPB_HUMAN@658
sp|O76021|RL1D1_HUMAN@373		sp|Q14566|MCM6_HUMAN@611		sp|P51659|DHB4_HUMAN@674
sp|P52732|KIF11_HUMAN@260		sp|P47756|CAPZB_HUMAN@235		sp|P29692|EF1D_HUMAN@17
sp|P42167|LAP2B_HUMAN@207		sp|Q99961|SH3G1_HUMAN@67		sp|O75643|U520_HUMAN@1049
sp|Q14247|SRC8_HUMAN@290		sp|O43242|PSMD3_HUMAN@186		sp|P35527|K1C9_HUMAN@336
sp|Q13573|SNW1_HUMAN@170		sp|Q07666|KHDR1_HUMAN@208		sp|P63241|IF5A1_HUMAN@34
sp|Q9UQE7|SMC3_HUMAN@280		sp|Q06830|PRDX1_HUMAN@93		sp|Q15233|NONO_HUMAN@290
sp|Q96NC0|ZMAT2_HUMAN@61		REV_sp|Q13368|MPP3_HUMAN@15		sp|Q96JH7|VCIP1_HUMAN@773
sp|P15121|ALDR_HUMAN@235		sp|Q9UMY4|SNX12_HUMAN@87		sp|Q9Y3B9|RRP15_HUMAN@200
sp|P22234|PUR6_HUMAN@246		sp|P16401|H15_HUMAN@93		sp|Q01082|SPTB2_HUMAN@1633
sp|P35579|MYH9_HUMAN@74		sp|P49005|DPOD2_HUMAN@267		sp|Q13439|GOGA4_HUMAN@463
sp|P30101|PDIA3_HUMAN@415		sp|P35580|MYH10_HUMAN@67		REV_sp|Q9H2M9|RBGPR_HUMAN@803
sp|O76021|RL1D1_HUMAN@417		sp|Q07666|KHDR1_HUMAN@424		sp|P09874|PARP1_HUMAN@134
sp|P49327|FAS_HUMAN@673		sp|P00918|CAH2_HUMAN@18		sp|Q9UBE0|SAE1_HUMAN@183
sp|Q14008|CKAP5_HUMAN@102		sp|Q16881|TRXR1_HUMAN@405		sp|P36543|VATE1_HUMAN@42
sp|P48426|PI42A_HUMAN@367		sp|Q7KZF4|SND1_HUMAN@515		sp|Q9BTT4|MED10_HUMAN@106
sp|O75643|U520_HUMAN@487		REV_sp|Q9BXT5|TEX15_HUMAN@956		sp|Q14204|DYHC1_HUMAN@4443
sp|Q96A08|H2B1A_HUMAN@122		sp|O75131|CPNE3_HUMAN@125		sp|P35998|PRS7_HUMAN@340
sp|Q29RF7|PDS5A_HUMAN@1315		sp|Q14151|SAFB2_HUMAN@437		sp|Q96KR1|ZFR_HUMAN@411
sp|P07954|FUMH_HUMAN@473		sp|P05141|ADT2_HUMAN@166		sp|A0FGR8|ESYT2_HUMAN@845
sp|Q96BR5|COA7_HUMAN@211		sp|Q8N6K7|SAMD3_HUMAN@269		sp|O43175|SERA_HUMAN@33
sp|Q9NVI7|ATD3A_HUMAN@194		sp|Q13428|TCOF_HUMAN@379		sp|O75391|SPAG7_HUMAN@45
sp|P27816|MAP4_HUMAN@769		sp|O60869|EDF1_HUMAN@143		sp|Q16543|CDC37_HUMAN@330
sp|Q5T2D3|OTUD3_HUMAN@8		sp|Q9UMS4|PRP19_HUMAN@266		sp|Q9H4A4|AMPB_HUMAN@555
sp|P11021|BIP_HUMAN@352		sp|P35241|RADI_HUMAN@371		sp|Q2NKX8|ERC6L_HUMAN@232
sp|P06576|ATPB_HUMAN@124		sp|Q13547|HDAC1_HUMAN@218		sp|Q9BT78|CSN4_HUMAN@32
sp|P46087|NOP2_HUMAN@721		sp|Q96D46|NMD3_HUMAN@92		sp|O60832|DKC1_HUMAN@379
sp|Q9Y237|PIN4_HUMAN@14		sp|Q8WW12|PCNP_HUMAN@96		sp|P54136|SYRC_HUMAN@306
sp|Q9P0M6|H2AW_HUMAN@239		sp|P19338|NUCL_HUMAN@521		sp|P13667|PDIA4_HUMAN@576
sp|Q16891|MIC60_HUMAN@122		sp|Q9Y490|TLN1_HUMAN@1544		sp|Q96I25|SPF45_HUMAN@184
sp|Q9BQ61|TRIR_HUMAN@104		sp|Q07021|C1QBP_HUMAN@123		sp|Q8WVQ1|CANT1_HUMAN@131
sp|Q9H910|JUPI2_HUMAN@67		sp|Q8ND61|CC020_HUMAN@805		sp|Q08752|PPID_HUMAN@257
sp|P07197|NFM_HUMAN@860		sp|P24539|AT5F1_HUMAN@139		sp|Q86UE4|LYRIC_HUMAN@504
sp|Q00688|FKBP3_HUMAN@80		sp|Q15397|PUM3_HUMAN@33		sp|P25685|DNJB1_HUMAN@306
REV_sp|Q8WZ42|TITIN_HUMAN@29866		sp|P49588|SYAC_HUMAN@934		sp|P50454|SERPH_HUMAN@39
sp|O14744|ANM5_HUMAN@380		sp|Q9UNH7|SNX6_HUMAN@225		sp|O89344|L_HENDH@2203
sp|Q9NR30|DDX21_HUMAN@18		sp|O00429|DNM1L_HUMAN@272		sp|Q96CW1|AP2M1_HUMAN@405
sp|P43243|MATR3_HUMAN@478		sp|O95292|VAPB_HUMAN@200		sp|P45954|ACDSB_HUMAN@324
sp|Q6UVJ0|SAS6_HUMAN@404		sp|P62753|RS6_HUMAN@116		sp|Q9BUR5|MIC26_HUMAN@32
sp|Q8IYB3|SRRM1_HUMAN@763		sp|Q01082|SPTB2_HUMAN@1063		sp|P50914|RL14_HUMAN@171
sp|P23528|COF1_HUMAN@92		sp|Q96PV6|LENG8_HUMAN@240		sp|Q9P289|STK26_HUMAN@276
sp|O15511|ARPC5_HUMAN@67		sp|Q9NZI8|IF2B1_HUMAN@450		sp|Q5HYI8|RABL3_HUMAN@156
sp|Q9NZI8|IF2B1_HUMAN@272		sp|Q16891|MIC60_HUMAN@451		sp|Q9UKX7|NUP50_HUMAN@83
sp|P27695|APEX1_HUMAN@224		sp|Q99829|CPNE1_HUMAN@182		sp|P36776|LONM_HUMAN@140
sp|Q14203|DCTN1_HUMAN@722		sp|Q96QC0|PP1RA_HUMAN@115		sp|Q14694|UBP10_HUMAN@780
sp|P08243|ASNS_HUMAN@511		sp|Q8IY21|DDX60_HUMAN@1559		sp|Q01082|SPTB2_HUMAN@1981
sp|Q8IVM0|CCD50_HUMAN@248		sp|Q01082|SPTB2_HUMAN@2362		sp|P05091|ALDH2_HUMAN@280
sp|B5ME19|EIFCL_HUMAN@94		sp|O75947|ATP5H_HUMAN@95		sp|P17706|PTN2_HUMAN@38
sp|O60870|KIN17_HUMAN@231		sp|Q9BVL2|NUP58_HUMAN@414		sp|Q92878|RAD50_HUMAN@938
sp|Q16658|FSCN1_HUMAN@42		sp|P27695|APEX1_HUMAN@35		sp|P03243|E1B55_ADE05@190
sp|Q9Y314|NOSIP_HUMAN@21		sp|Q14203|DCTN1_HUMAN@518		sp|O15066|KIF3B_HUMAN@473
sp|P62834|RAP1A_HUMAN@173		sp|O00267|SPT5H_HUMAN@344		sp|Q05682|CALD1_HUMAN@693
sp|P30040|ERP29_HUMAN@182		sp|Q9H2M9|RBGPR_HUMAN@929		sp|P0CG38|POTEI_HUMAN@813
sp|P02786|TFR1_HUMAN@371		sp|Q8WZ42|TITIN_HUMAN@2701		sp|Q7L014|DDX46_HUMAN@271
sp|Q9UIA9|XPO7_HUMAN@338		sp|Q00610|CLH1_HUMAN@246		sp|Q8NE62|CHDH_HUMAN@75
sp|Q86VM9|ZCH18_HUMAN@908		REV_sp|Q9H222|ABCG5_HUMAN@582		sp|Q06830|PRDX1_HUMAN@190
sp|P55196|AFAD_HUMAN@1186		sp|P46063|RECQ1_HUMAN@38		sp|Q99757|THIOM_HUMAN@106
sp|Q92878|RAD50_HUMAN@909		sp|P33992|MCM5_HUMAN@392		sp|Q15291|RBBP5_HUMAN@488
sp|P23497|SP100_HUMAN@297		sp|Q9NPL8|TIDC1_HUMAN@64		sp|Q9NR30|DDX21_HUMAN@61
sp|Q92598|HS105_HUMAN@471		sp|P36776|LONM_HUMAN@426		sp|P09874|PARP1_HUMAN@23
sp|P34931|HS71L_HUMAN@514		sp|P37840|SYUA_HUMAN@45		sp|Q5TBB1|RNH2B_HUMAN@247
sp|O75122|CLAP2_HUMAN@357		sp|Q9UQE7|SMC3_HUMAN@140		sp|Q15149|PLEC_HUMAN@3925
sp|P29966|MARCS_HUMAN@152		sp|P07195|LDHB_HUMAN@318		sp|Q6NUQ1|RINT1_HUMAN@76
sp|Q99714|HCD2_HUMAN@52		sp|P34897|GLYM_HUMAN@297		sp|P33176|KINH_HUMAN@596
sp|P05387|RLA2_HUMAN@94		sp|Q9H0A0|NAT10_HUMAN@274		sp|Q13564|ULA1_HUMAN@456
sp|Q13409|DC1I2_HUMAN@55		sp|P16402|H13_HUMAN@123		sp|Q02878|RL6_HUMAN@131
sp|P16401|H15_HUMAN@130		sp|P30048|PRDX3_HUMAN@83		sp|Q9BQG0|MBB1A_HUMAN@125
sp|O95347|SMC2_HUMAN@706		sp|P63104|1433Z_HUMAN@68		sp|P07197|NFM_HUMAN@327
sp|Q99459|CDC5L_HUMAN@432		sp|P09429|HMGB1_HUMAN@172		sp|Q9Y3C4|TPRKB_HUMAN@24
sp|P13667|PDIA4_HUMAN@543		sp|Q15181|IPYR_HUMAN@228		REV_sp|P62495|ERF1_HUMAN@267
sp|Q96N23|CFA54_HUMAN@2960		sp|P36776|LONM_HUMAN@393		sp|Q9BZD4|NUF2_HUMAN@351
sp|O00273|DFFA_HUMAN@248		sp|P02545|LMNA_HUMAN@135		sp|Q9UJY5|GGA1_HUMAN@566
sp|O43719|HTSF1_HUMAN@169		sp|P00491|PNPH_HUMAN@211		sp|Q96PK6|RBM14_HUMAN@164
sp|O75844|FACE1_HUMAN@429		sp|P05387|RLA2_HUMAN@41		sp|P07948|LYN_HUMAN@40
sp|P05455|LA_HUMAN@200		sp|O76021|RL1D1_HUMAN@373		sp|Q09666|AHNK_HUMAN@4455
sp|P52815|RM12_HUMAN@142		sp|Q9NZI8|IF2B1_HUMAN@60		sp|Q9Y221|NIP7_HUMAN@15
sp|P00390|GSHR_HUMAN@296		sp|P52732|KIF11_HUMAN@260		sp|O60231|DHX16_HUMAN@73
sp|P16402|H13_HUMAN@128		sp|P42167|LAP2B_HUMAN@207		sp|Q9NXG0|CNTLN_HUMAN@392
sp|P22234|PUR6_HUMAN@53		sp|Q14247|SRC8_HUMAN@290		sp|P10412|H14_HUMAN@186
REV_sp|Q86YF9|DZIP1_HUMAN@555		sp|Q13573|SNW1_HUMAN@170		sp|O75534|CSDE1_HUMAN@517
REV_sp|Q15147|PLCB4_HUMAN@239		sp|P15121|ALDR_HUMAN@235		sp|O95376|ARI2_HUMAN@392
sp|P25789|PSA4_HUMAN@199		sp|P14866|HNRPL_HUMAN@97		sp|P25398|RS12_HUMAN@121
sp|Q8NC51|SERB1_HUMAN@236		sp|P22234|PUR6_HUMAN@246		REV_sp|P23074|POL_SFV1@1080
sp|P15121|ALDR_HUMAN@263		sp|Q9NZI8|IF2B1_HUMAN@561		sp|Q9BQG0|MBB1A_HUMAN@1254
sp|O75369|FLNB_HUMAN@681		sp|P07814|SYEP_HUMAN@774		sp|P04040|CATA_HUMAN@23
sp|P25705|ATPA_HUMAN@194		sp|Q9Y696|CLIC4_HUMAN@199		sp|P05783|K1C18_HUMAN@372
sp|P55786|PSA_HUMAN@163		sp|P48507|GSH0_HUMAN@9		sp|Q96EY1|DNJA3_HUMAN@335
sp|Q9NX70|MED29_HUMAN@188		sp|P78371|TCPB_HUMAN@191		REV_sp|P50748|KNTC1_HUMAN@2018
sp|P00558|PGK1_HUMAN@267		sp|O76021|RL1D1_HUMAN@417		sp|Q9UHQ4|BAP29_HUMAN@146
sp|Q12931|TRAP1_HUMAN@181		sp|P07197|NFM_HUMAN@856		sp|P46940|IQGA1_HUMAN@924
sp|Q9Y230|RUVB2_HUMAN@186		sp|Q9UL25|RAB21_HUMAN@164		sp|P22830|HEMH_HUMAN@113
REV_sp|O60486|PLXC1_HUMAN@302		sp|P49327|FAS_HUMAN@673		sp|O43447|PPIH_HUMAN@28
sp|Q13045|FLII_HUMAN@1007		sp|P48426|PI42A_HUMAN@367		sp|Q92945|FUBP2_HUMAN@346
sp|Q9P013|CWC15_HUMAN@18		sp|Q13263|TIF1B_HUMAN@188		sp|P13639|EF2_HUMAN@239
sp|P27797|CALR_HUMAN@209		sp|O75643|U520_HUMAN@487		sp|Q12931|TRAP1_HUMAN@652
sp|O75400|PR40A_HUMAN@196		sp|P0DMV9|HS71B_HUMAN@246		sp|O75937|DNJC8_HUMAN@135
sp|P99999|CYC_HUMAN@74		sp|Q9UHD8|SEPT9_HUMAN@69		sp|O95400|CD2B2_HUMAN@26
sp|Q9HAV7|GRPE1_HUMAN@94		sp|Q9NWB6|ARGL1_HUMAN@188		REV_sp|P29144|TPP2_HUMAN@46
sp|O60664|PLIN3_HUMAN@289		sp|Q02878|RL6_HUMAN@33		sp|P08238|HS90B_HUMAN@491
sp|Q9UNZ2|NSF1C_HUMAN@251		sp|P07954|FUMH_HUMAN@473		sp|O75694|NU155_HUMAN@1087
sp|P13639|EF2_HUMAN@275		sp|O14776|TCRG1_HUMAN@878		sp|Q4VCS5|AMOT_HUMAN@156
sp|P78344|IF4G2_HUMAN@520		sp|Q96BR5|COA7_HUMAN@211		sp|Q8NFC6|BD1L1_HUMAN@1357
sp|Q13573|SNW1_HUMAN@193		sp|Q9NU22|MDN1_HUMAN@5342		sp|P16949|STMN1_HUMAN@85
sp|P40926|MDHM_HUMAN@241		REV_sp|Q96IW2|SHD_HUMAN@152		sp|P39023|RL3_HUMAN@362
sp|P31948|STIP1_HUMAN@337		sp|Q12906|ILF3_HUMAN@734		sp|P46939|UTRN_HUMAN@1685
sp|P17655|CAN2_HUMAN@7		sp|P27816|MAP4_HUMAN@769		sp|Q9UJC5|SH3L2_HUMAN@98
sp|P04843|RPN1_HUMAN@587		sp|Q9P215|POGK_HUMAN@389		sp|Q00341|VIGLN_HUMAN@477
sp|P0DMV9|HS71B_HUMAN@108		sp|P11021|BIP_HUMAN@352		sp|P25789|PSA4_HUMAN@187
sp|Q9NX63|MIC19_HUMAN@45		sp|Q9H1Z4|WDR13_HUMAN@443		sp|Q15404|RSU1_HUMAN@158
sp|Q6YN16|HSDL2_HUMAN@87		sp|P06576|ATPB_HUMAN@124		sp|Q5JTH9|RRP12_HUMAN@1014
sp|Q9Y333|LSM2_HUMAN@88		sp|P46087|NOP2_HUMAN@721		sp|Q9HC38|GLOD4_HUMAN@239
sp|Q02790|FKBP4_HUMAN@274		sp|P49588|SYAC_HUMAN@366		sp|P15311|EZRI_HUMAN@143
sp|O14737|PDCD5_HUMAN@105		sp|Q5VTE0|EF1A3_HUMAN@318		sp|Q86T03|PP4P1_HUMAN@120
sp|O00567|NOP56_HUMAN@540		sp|Q9Y237|PIN4_HUMAN@14		sp|P08133|ANXA6_HUMAN@9
sp|P17096|HMGA1_HUMAN@31		sp|Q9P0M6|H2AW_HUMAN@239		REV_sp|Q66431|L_DUGBA@1024
sp|Q96EC8|YIPF6_HUMAN@67		sp|Q16891|MIC60_HUMAN@122		sp|Q00325|S25A3_HUMAN@304
sp|P26599|PTBP1_HUMAN@515		sp|Q9H3K6|BOLA2_HUMAN@47		sp|Q9UIG0|BAZ1B_HUMAN@1089
sp|Q9UQ35|SRRM2_HUMAN@1605		sp|Q9BQ61|TRIR_HUMAN@104		sp|Q8WXF1|PSPC1_HUMAN@198
sp|P55072|TERA_HUMAN@18		sp|Q9Y5B9|SP16H_HUMAN@120		sp|Q8N568|DCLK2_HUMAN@218
sp|Q96C19|EFHD2_HUMAN@188		sp|Q9H910|JUPI2_HUMAN@67		sp|B5MCY1|TDR15_HUMAN@30
sp|Q92747|ARC1A_HUMAN@179		sp|P07197|NFM_HUMAN@860		sp|Q9P2J5|SYLC_HUMAN@970
sp|P00558|PGK1_HUMAN@275		sp|Q00688|FKBP3_HUMAN@80		sp|Q9HC36|MRM3_HUMAN@96
sp|P08238|HS90B_HUMAN@64		sp|P17812|PYRG1_HUMAN@309		sp|Q8IWA0|WDR75_HUMAN@622
sp|Q9H892|TTC12_HUMAN@565		sp|Q9NRZ9|HELLS_HUMAN@731		REV_sp|O75969|AKAP3_HUMAN@681
sp|P10599|THIO_HUMAN@96		sp|O14744|ANM5_HUMAN@380		sp|P62753|RS6_HUMAN@64
sp|P13639|EF2_HUMAN@445		sp|Q14247|SRC8_HUMAN@314		sp|P05141|ADT2_HUMAN@147
sp|Q9H3K2|GHITM_HUMAN@73		REV_sp|Q6TQR6|L_CCHFI@1040		sp|P52732|KIF11_HUMAN@60
sp|Q14204|DYHC1_HUMAN@2094		sp|Q15147|PLCB4_HUMAN@943		sp|P23526|SAHH_HUMAN@322
sp|Q15382|RHEB_HUMAN@5		sp|Q15459|SF3A1_HUMAN@708		sp|Q14315|FLNC_HUMAN@162
sp|P05455|LA_HUMAN@105		sp|Q9NR30|DDX21_HUMAN@18		sp|Q7Z4V5|HDGR2_HUMAN@439
sp|P46976|GLYG_HUMAN@344		sp|Q12996|CSTF3_HUMAN@426		sp|Q14839|CHD4_HUMAN@1778
sp|Q96GM5|SMRD1_HUMAN@228		sp|P48047|ATPO_HUMAN@60		sp|O00425|IF2B3_HUMAN@429
sp|Q16658|FSCN1_HUMAN@41		sp|Q76RD8|RIR1_VACCA@466		sp|P48637|GSHB_HUMAN@108
sp|Q9BQG0|MBB1A_HUMAN@1185		sp|P43243|MATR3_HUMAN@478		sp|P13984|T2FB_HUMAN@33
sp|P15531|NDKA_HUMAN@100		sp|Q07065|CKAP4_HUMAN@594		sp|Q9H4A4|AMPB_HUMAN@592
sp|Q13428|TCOF_HUMAN@31		REV_sp|O60437|PEPL_HUMAN@1234		sp|Q9BQ75|CMS1_HUMAN@84
sp|Q9Y4E1|WAC2C_HUMAN@1153		sp|Q6UVJ0|SAS6_HUMAN@404		sp|Q15233|NONO_HUMAN@239
sp|Q14247|SRC8_HUMAN@304		sp|Q9BTU6|P4K2A_HUMAN@243		sp|P08238|HS90B_HUMAN@574
sp|P08579|RU2B_HUMAN@93		sp|P62917|RL8_HUMAN@144		sp|P55786|PSA_HUMAN@730
sp|O43670|ZN207_HUMAN@100		sp|P23528|COF1_HUMAN@92		sp|P47756|CAPZB_HUMAN@235
sp|P62820|RAB1A_HUMAN@187		sp|P49368|TCPG_HUMAN@31		REV_sp|Q8NCM8|DYHC2_HUMAN@1707
sp|Q96PU8|QKI_HUMAN@190		sp|O15511|ARPC5_HUMAN@67		sp|O00566|MPP10_HUMAN@518
sp|O76094|SRP72_HUMAN@283		sp|Q14694|UBP10_HUMAN@662		sp|Q13129|RLF_HUMAN@1068
sp|Q9UIG0|BAZ1B_HUMAN@1037		sp|Q8WUA2|PPIL4_HUMAN@383		sp|Q06830|PRDX1_HUMAN@93
sp|P08243|ASNS_HUMAN@478		sp|Q9NZI8|IF2B1_HUMAN@272		REV_sp|Q13368|MPP3_HUMAN@15
sp|Q8NC51|SERB1_HUMAN@299		sp|Q9Y3F4|STRAP_HUMAN@137		sp|P09874|PARP1_HUMAN@394
sp|Q14839|CHD4_HUMAN@295		sp|P27695|APEX1_HUMAN@224		sp|Q9H6T3|RPAP3_HUMAN@294
sp|Q99615|DNJC7_HUMAN@41		sp|B5ME19|EIFCL_HUMAN@94		sp|Q86VM9|ZCH18_HUMAN@638
sp|Q9BUT1|DHRS6_HUMAN@32		sp|P08243|ASNS_HUMAN@511		sp|Q9UMY4|SNX12_HUMAN@87
sp|Q9P2J5|SYLC_HUMAN@983		sp|Q9Y490|TLN1_HUMAN@1917		sp|P16401|H15_HUMAN@93
sp|P04075|ALDOA_HUMAN@322		sp|P37837|TALDO_HUMAN@130		sp|P05783|K1C18_HUMAN@317
sp|P49736|MCM2_HUMAN@742		sp|Q1KMD3|HNRL2_HUMAN@26		sp|Q96JJ3|ELMO2_HUMAN@496
sp|O60271|JIP4_HUMAN@368		sp|Q13185|CBX3_HUMAN@44		sp|P49005|DPOD2_HUMAN@267
sp|Q15269|PWP2_HUMAN@46		sp|Q8N1G2|CMTR1_HUMAN@628		sp|P35580|MYH10_HUMAN@67
sp|Q00059|TFAM_HUMAN@76		sp|Q9Y285|SYFA_HUMAN@315		sp|Q07666|KHDR1_HUMAN@424
sp|P26599|PTBP1_HUMAN@271		sp|Q9Y314|NOSIP_HUMAN@21		sp|Q06546|GABPA_HUMAN@292
sp|P26599|PTBP1_HUMAN@45		sp|Q9Y6E2|5MP1_HUMAN@6		sp|P14550|AK1A1_HUMAN@23
sp|Q9UMS4|PRP19_HUMAN@64		sp|P62834|RAP1A_HUMAN@173		sp|P00918|CAH2_HUMAN@18
sp|P13667|PDIA4_HUMAN@145		REV_sp|Q9H1H9|KI13A_HUMAN@1068		sp|P51828|ADCY7_HUMAN@711
sp|P61604|CH10_HUMAN@36		sp|P30040|ERP29_HUMAN@182		sp|Q96AC1|FERM2_HUMAN@238
sp|P27816|MAP4_HUMAN@490		sp|Q14683|SMC1A_HUMAN@874		sp|P05023|AT1A1_HUMAN@377
sp|Q14204|DYHC1_HUMAN@3480		sp|P18077|RL35A_HUMAN@54		sp|P11388|TOP2A_HUMAN@798
sp|P06753|TPM3_HUMAN@232		sp|P02786|TFR1_HUMAN@371		sp|Q16881|TRXR1_HUMAN@405
sp|Q99729|ROAA_HUMAN@142		sp|Q13144|EI2BE_HUMAN@699		sp|Q969U7|PSMG2_HUMAN@149
REV_sp|P0DTD1|R1AB_SARS2@6360		sp|Q7Z6Z7|HUWE1_HUMAN@1107		sp|Q7KZF4|SND1_HUMAN@515
sp|P13010|XRCC5_HUMAN@469		sp|Q9UIA9|XPO7_HUMAN@338		sp|O43395|PRPF3_HUMAN@46
sp|P35232|PHB1_HUMAN@208		sp|P55209|NP1L1_HUMAN@266		sp|O75691|UTP20_HUMAN@1402
sp|P11021|BIP_HUMAN@376		sp|P23527|H2B1O_HUMAN@21		sp|Q9UJS0|S2513_HUMAN@245
sp|O43765|SGTA_HUMAN@200		sp|P53985|MOT1_HUMAN@462		sp|P48047|ATPO_HUMAN@54
sp|Q92922|SMRC1_HUMAN@608		sp|P23497|SP100_HUMAN@762		REV_sp|Q9Y4I1|MYO5A_HUMAN@367
sp|Q96AG4|LRC59_HUMAN@73		sp|O75027|ABCB7_HUMAN@251		sp|Q14151|SAFB2_HUMAN@437
sp|O00487|PSDE_HUMAN@277		sp|O00165|HAX1_HUMAN@218		sp|P05141|ADT2_HUMAN@166
sp|P40222|TXLNA_HUMAN@455		REV_sp|Q8N3K9|CMYA5_HUMAN@3745		sp|Q13428|TCOF_HUMAN@379
sp|Q9UBV8|PEF1_HUMAN@260		sp|P49327|FAS_HUMAN@2438		sp|P61313|RL15_HUMAN@93
sp|P19338|NUCL_HUMAN@513		sp|Q92878|RAD50_HUMAN@909		sp|O60869|EDF1_HUMAN@143
sp|Q15459|SF3A1_HUMAN@449		sp|P23497|SP100_HUMAN@297		sp|Q9UI26|IPO11_HUMAN@216
sp|Q9P258|RCC2_HUMAN@320		sp|Q92598|HS105_HUMAN@471		sp|P27816|MAP4_HUMAN@912
sp|P67809|YBOX1_HUMAN@137		sp|P34931|HS71L_HUMAN@514		sp|Q9Y315|DEOC_HUMAN@111
sp|Q99623|PHB2_HUMAN@218		sp|P55060|XPO2_HUMAN@17		sp|Q92616|GCN1_HUMAN@436
sp|Q68DA7|FMN1_HUMAN@1054		sp|P51114|FXR1_HUMAN@563		sp|Q9UMS4|PRP19_HUMAN@266
sp|O75683|SURF6_HUMAN@34		sp|P29966|MARCS_HUMAN@152		sp|Q9Y263|PLAP_HUMAN@554
sp|O00299|CLIC1_HUMAN@131		sp|P62826|RAN_HUMAN@60		sp|P35241|RADI_HUMAN@371
sp|P33992|MCM5_HUMAN@700		sp|Q9H9Y6|RPA2_HUMAN@797		REV_sp|Q5VYM1|S31G1_HUMAN@145
sp|Q9Y5B9|SP16H_HUMAN@497		sp|O95456|PSMG1_HUMAN@193		sp|Q7Z478|DHX29_HUMAN@576
sp|O94925|GLSK_HUMAN@130		sp|Q99714|HCD2_HUMAN@52		sp|P21796|VDAC1_HUMAN@20
sp|Q9H9B4|SFXN1_HUMAN@223		sp|P05387|RLA2_HUMAN@94		sp|P23396|RS3_HUMAN@197
sp|Q16543|CDC37_HUMAN@69		sp|P16401|H15_HUMAN@130		sp|Q8WW12|PCNP_HUMAN@96
sp|P13797|PLST_HUMAN@91		sp|O95347|SMC2_HUMAN@706		sp|Q9NQC3|RTN4_HUMAN@969
sp|Q8N5K1|CISD2_HUMAN@74		sp|P78527|PRKDC_HUMAN@205		sp|Q9NW13|RBM28_HUMAN@505
sp|Q4VCS5|AMOT_HUMAN@481		sp|Q99459|CDC5L_HUMAN@432		sp|P19338|NUCL_HUMAN@521
sp|Q8NI27|THOC2_HUMAN@1392		sp|P13667|PDIA4_HUMAN@543		sp|P48739|PIPNB_HUMAN@44
sp|O76021|RL1D1_HUMAN@356		sp|Q9NZB2|F120A_HUMAN@684		sp|Q16851|UGPA_HUMAN@323
sp|Q5TEC6|H37_HUMAN@15		sp|P52306|GDS1_HUMAN@314		sp|Q9UNF1|MAGD2_HUMAN@124
sp|P52907|CAZA1_HUMAN@278		sp|Q9UNH7|SNX6_HUMAN@307		sp|P78527|PRKDC_HUMAN@3753
sp|Q5VYK3|ECM29_HUMAN@1438		sp|P55265|DSRAD_HUMAN@936		sp|O00151|PDLI1_HUMAN@246
sp|P50914|RL14_HUMAN@132		sp|Q9NYF8|BCLF1_HUMAN@593		sp|Q9Y4D8|HECD4_HUMAN@3378
sp|Q8NHP6|MSPD2_HUMAN@293		sp|O43719|HTSF1_HUMAN@169		sp|Q9Y490|TLN1_HUMAN@1544
sp|Q9UM54|MYO6_HUMAN@1076		sp|P15682|NCAP_I33A0@4		sp|P07355|ANXA2_HUMAN@49
sp|Q92841|DDX17_HUMAN@313		sp|Q96EX1|SIM12_HUMAN@75		sp|Q07021|C1QBP_HUMAN@123
sp|P48444|COPD_HUMAN@347		sp|P05455|LA_HUMAN@200		sp|Q15075|EEA1_HUMAN@1396
sp|P13639|EF2_HUMAN@333		sp|Q6PI48|SYDM_HUMAN@362		sp|P24539|AT5F1_HUMAN@139
sp|P61011|SRP54_HUMAN@92		sp|Q9H4M9|EHD1_HUMAN@511		sp|P55809|SCOT1_HUMAN@473
sp|P48643|TCPE_HUMAN@265		sp|P52815|RM12_HUMAN@142		sp|O95202|LETM1_HUMAN@661
sp|Q04637|IF4G1_HUMAN@602		sp|P00390|GSHR_HUMAN@296		sp|O94979|SC31A_HUMAN@1142
sp|Q02878|RL6_HUMAN@8		sp|Q96HE7|ERO1A_HUMAN@455		sp|P49588|SYAC_HUMAN@934
sp|Q9UBB9|TFP11_HUMAN@261		sp|P16402|H13_HUMAN@128		sp|P78382|S35A1_HUMAN@74
sp|P10412|H14_HUMAN@160		sp|P22234|PUR6_HUMAN@53		sp|P08133|ANXA6_HUMAN@68
sp|P50990|TCPQ_HUMAN@534		sp|P12956|XRCC6_HUMAN@553		sp|O95292|VAPB_HUMAN@200
sp|P52272|HNRPM_HUMAN@48		REV_sp|Q86YF9|DZIP1_HUMAN@555		sp|P09493|TPM1_HUMAN@248
sp|Q9HC35|EMAL4_HUMAN@112		sp|O15397|IPO8_HUMAN@503		sp|Q01082|SPTB2_HUMAN@1063
sp|P84098|RL19_HUMAN@190		sp|P25789|PSA4_HUMAN@199		sp|P53992|SC24C_HUMAN@364
sp|P20700|LMNB1_HUMAN@79		sp|Q9Y2T2|AP3M1_HUMAN@388		REV_sp|Q8WWL7|CCNB3_HUMAN@1169
sp|Q86UP2|KTN1_HUMAN@142		sp|Q8NC51|SERB1_HUMAN@236		sp|O00330|ODPX_HUMAN@384
sp|P98175|RBM10_HUMAN@881		sp|P27695|APEX1_HUMAN@7		sp|Q92878|RAD50_HUMAN@264
sp|Q14690|RRP5_HUMAN@1462		sp|Q15008|PSMD6_HUMAN@117		sp|Q9BQI0|AIF1L_HUMAN@13
sp|P16403|H12_HUMAN@206		sp|P15121|ALDR_HUMAN@263		sp|Q9NZI8|IF2B1_HUMAN@450
sp|Q15459|SF3A1_HUMAN@702		sp|Q7Z422|SZRD1_HUMAN@86		sp|Q16891|MIC60_HUMAN@451
sp|P12270|TPR_HUMAN@364		sp|O75369|FLNB_HUMAN@681		sp|Q96JM3|CHAP1_HUMAN@617
REV_sp|Q9HCE1|MOV10_HUMAN@143		sp|O75643|U520_HUMAN@177		sp|P27348|1433T_HUMAN@80
sp|P07814|SYEP_HUMAN@800		sp|P25705|ATPA_HUMAN@194		sp|Q9NUA8|ZBT40_HUMAN@272
sp|P13639|EF2_HUMAN@439		sp|P51812|KS6A3_HUMAN@282		sp|Q6YN16|HSDL2_HUMAN@220
sp|Q9H6F5|CCD86_HUMAN@215		sp|P55786|PSA_HUMAN@163		sp|Q99829|CPNE1_HUMAN@182
sp|Q15024|EXOS7_HUMAN@116		sp|Q9NX70|MED29_HUMAN@188		sp|P78344|IF4G2_HUMAN@187
sp|P51532|SMCA4_HUMAN@496		sp|P00558|PGK1_HUMAN@267		sp|Q8N4T8|CBR4_HUMAN@196
sp|Q15185|TEBP_HUMAN@33		sp|P11142|HSP7C_HUMAN@246		sp|Q01082|SPTB2_HUMAN@2362
sp|P34932|HSP74_HUMAN@798		sp|O94826|TOM70_HUMAN@188		sp|P49792|RBP2_HUMAN@1533
sp|Q96PK6|RBM14_HUMAN@149		sp|Q9Y230|RUVB2_HUMAN@186		sp|Q99848|EBP2_HUMAN@44
sp|Q96FW1|OTUB1_HUMAN@120		sp|Q9Y2L1|RRP44_HUMAN@906		sp|O75947|ATP5H_HUMAN@95
sp|P62937|PPIA_HUMAN@133		sp|Q9UII2|ATIF1_HUMAN@49		sp|Q9BVL2|NUP58_HUMAN@414
sp|Q8NC51|SERB1_HUMAN@310		sp|P55854|SUMO3_HUMAN@11		sp|P27695|APEX1_HUMAN@35
sp|Q7KZF4|SND1_HUMAN@339		sp|Q13045|FLII_HUMAN@1007		sp|Q99661|KIF2C_HUMAN@297
sp|Q9Y6G9|DC1L1_HUMAN@505		sp|O60749|SNX2_HUMAN@218		sp|O75691|UTP20_HUMAN@2151
sp|Q9P0M6|H2AW_HUMAN@167		sp|O60812|HNRC1_HUMAN@89		sp|Q10567|AP1B1_HUMAN@887
sp|P46013|KI67_HUMAN@1756		sp|P09936|UCHL1_HUMAN@78		sp|O00267|SPT5H_HUMAN@344
sp|B5ME19|EIFCL_HUMAN@628		REV_sp|O95347|SMC2_HUMAN@265		sp|Q9P2E9|RRBP1_HUMAN@588
sp|Q9UIG0|BAZ1B_HUMAN@885		sp|Q9BSJ8|ESYT1_HUMAN@673		sp|Q4G148|GXLT1_HUMAN@400
sp|P78527|PRKDC_HUMAN@2970		sp|O00469|PLOD2_HUMAN@153		sp|A0A7H0DN52|RIR1_MONPV@17
sp|P11142|HSP7C_HUMAN@56		sp|P27797|CALR_HUMAN@209		sp|Q9NX20|RM16_HUMAN@61
sp|Q7Z2W4|ZCCHV_HUMAN@314		sp|P16402|H13_HUMAN@111		sp|P49419|AL7A1_HUMAN@537
sp|P61247|RS3A_HUMAN@195		sp|O75400|PR40A_HUMAN@196		sp|Q00610|CLH1_HUMAN@246
sp|P62753|RS6_HUMAN@175		sp|P78371|TCPB_HUMAN@154		sp|Q9UKZ1|CNO11_HUMAN@327
sp|O14979|HNRDL_HUMAN@162		sp|P99999|CYC_HUMAN@74		sp|Q9UHD8|SEPT9_HUMAN@87
sp|Q9NVI7|ATD3A_HUMAN@183		sp|Q96FJ2|DYL2_HUMAN@36		sp|P46063|RECQ1_HUMAN@38
sp|P62829|RL23_HUMAN@35		sp|Q86UP2|KTN1_HUMAN@345		REV_sp|Q9H222|ABCG5_HUMAN@582
sp|P50454|SERPH_HUMAN@300		sp|P27816|MAP4_HUMAN@1015		sp|P33992|MCM5_HUMAN@392
sp|Q92878|RAD50_HUMAN@230		sp|O60664|PLIN3_HUMAN@289		sp|O15042|SR140_HUMAN@159
sp|P34931|HS71L_HUMAN@253		sp|Q9UNZ2|NSF1C_HUMAN@251		sp|Q9UJW9|SRTD3_HUMAN@40
sp|Q9H9B4|SFXN1_HUMAN@202		sp|P13639|EF2_HUMAN@275		sp|P55327|TPD52_HUMAN@192
sp|P62266|RS23_HUMAN@108		sp|P78344|IF4G2_HUMAN@520		sp|P36776|LONM_HUMAN@426
sp|P18621|RL17_HUMAN@167		sp|Q03701|CEBPZ_HUMAN@206		sp|P37840|SYUA_HUMAN@45
sp|Q01105|SET_HUMAN@83		sp|Q13573|SNW1_HUMAN@193		sp|Q8TEM1|PO210_HUMAN@1576
sp|Q07864|DPOE1_HUMAN@1857		sp|O00762|UBE2C_HUMAN@163		sp|Q9BTD8|RBM42_HUMAN@246
sp|P11388|TOP2A_HUMAN@1433		sp|P31948|STIP1_HUMAN@337		sp|Q05639|EF1A2_HUMAN@179
sp|P12277|KCRB_HUMAN@304		sp|P50395|GDIB_HUMAN@364		sp|P40429|RL13A_HUMAN@188
sp|O75396|SC22B_HUMAN@178		sp|Q5VTE0|EF1A3_HUMAN@395		sp|P31644|GBRA5_HUMAN@361
REV_sp|Q15650|TRIP4_HUMAN@257		sp|P04843|RPN1_HUMAN@587		sp|P46013|KI67_HUMAN@1639
sp|O43447|PPIH_HUMAN@38		sp|Q14008|CKAP5_HUMAN@539		sp|O89344|L_HENDH@2024
sp|Q6PI48|SYDM_HUMAN@133		sp|P0DMV9|HS71B_HUMAN@108		sp|P07195|LDHB_HUMAN@318
sp|P62917|RL8_HUMAN@181		sp|Q9NX63|MIC19_HUMAN@45		sp|Q15459|SF3A1_HUMAN@743
sp|Q5H8A4|PIGG_HUMAN@152		sp|P49750|YLPM1_HUMAN@317		sp|P48200|IREB2_HUMAN@24
sp|P38159|RBMX_HUMAN@47		sp|Q9NVI1|FANCI_HUMAN@339		sp|Q9H0A0|NAT10_HUMAN@274
sp|Q7Z460|CLAP1_HUMAN@716		sp|Q9C0B1|FTO_HUMAN@88		REV_sp|Q2M389|WASC4_HUMAN@134
sp|P24539|AT5F1_HUMAN@131		sp|Q6YN16|HSDL2_HUMAN@87		sp|P16402|H13_HUMAN@123
sp|P78347|GTF2I_HUMAN@94		sp|P30101|PDIA3_HUMAN@422		sp|Q9Y376|CAB39_HUMAN@96
sp|Q8N766|EMC1_HUMAN@52		sp|P13674|P4HA1_HUMAN@62		sp|P30048|PRDX3_HUMAN@83
sp|P14618|KPYM_HUMAN@207		sp|Q99623|PHB2_HUMAN@236		sp|P63104|1433Z_HUMAN@68
sp|Q8IUE6|H2A2B_HUMAN@120		sp|Q02790|FKBP4_HUMAN@274		sp|Q9ULA0|DNPEP_HUMAN@29
sp|P78417|GSTO1_HUMAN@160		sp|Q00839|HNRPU_HUMAN@214		sp|P07197|NFM_HUMAN@671
sp|Q05048|CSTF1_HUMAN@204		sp|Q9P289|STK26_HUMAN@32		sp|P09429|HMGB1_HUMAN@172
sp|Q05682|CALD1_HUMAN@733		sp|O14737|PDCD5_HUMAN@105		sp|P36776|LONM_HUMAN@393
sp|Q9BR61|ACBD6_HUMAN@120		sp|O43491|E41L2_HUMAN@505		sp|P02545|LMNA_HUMAN@135
sp|Q12996|CSTF3_HUMAN@274		sp|Q9H0A0|NAT10_HUMAN@989		sp|Q15181|IPYR_HUMAN@228
sp|O75947|ATP5H_HUMAN@78		sp|O00567|NOP56_HUMAN@540		sp|P00491|PNPH_HUMAN@211
sp|P02786|TFR1_HUMAN@53		sp|P35613|BASI_HUMAN@187		sp|P05387|RLA2_HUMAN@41
sp|Q99832|TCPH_HUMAN@320		sp|P11310|ACADM_HUMAN@301		sp|O60216|RAD21_HUMAN@605
sp|Q00688|FKBP3_HUMAN@94		sp|P17096|HMGA1_HUMAN@31		sp|P61978|HNRPK_HUMAN@396
sp|O94826|TOM70_HUMAN@359		sp|Q96EC8|YIPF6_HUMAN@67		sp|P49368|TCPG_HUMAN@528
sp|Q96AG4|LRC59_HUMAN@71		sp|K9N7C7|R1AB_MERS1@3965		sp|P11216|PYGB_HUMAN@290
sp|P05388|RLA0_HUMAN@297		sp|P26599|PTBP1_HUMAN@515		sp|O76021|RL1D1_HUMAN@373
sp|Q15084|PDIA6_HUMAN@160		sp|P45973|CBX5_HUMAN@32		sp|Q12873|CHD3_HUMAN@894
sp|P23588|IF4B_HUMAN@577		sp|Q9NXW2|DJB12_HUMAN@103		sp|Q14203|DCTN1_HUMAN@1201
sp|Q9BZF9|UACA_HUMAN@543		sp|Q9UQ35|SRRM2_HUMAN@1605		REV_sp|A4UGR9|XIRP2_HUMAN@3174
sp|Q6UY63|L_MABVO@1055		sp|P25440|BRD2_HUMAN@544		sp|Q9NZI8|IF2B1_HUMAN@60
sp|Q8IV35|WDR49_HUMAN@564		sp|P55072|TERA_HUMAN@18		sp|P52732|KIF11_HUMAN@260
sp|Q9Y3D6|FIS1_HUMAN@25		REV_sp|O75330|HMMR_HUMAN@325		sp|P42167|LAP2B_HUMAN@207
sp|Q9BVJ6|UT14A_HUMAN@662		sp|Q96C19|EFHD2_HUMAN@188		sp|Q14247|SRC8_HUMAN@290
sp|P14999|LT_POVBA@513		sp|Q92747|ARC1A_HUMAN@179		sp|Q13573|SNW1_HUMAN@170
sp|Q8NF91|SYNE1_HUMAN@231		sp|P18621|RL17_HUMAN@37		sp|Q96NC0|ZMAT2_HUMAN@61
sp|Q9NTK5|OLA1_HUMAN@354		sp|P49756|RBM25_HUMAN@155		sp|P15121|ALDR_HUMAN@235
sp|P55263|ADK_HUMAN@264		sp|B5ME19|EIFCL_HUMAN@136		sp|P14866|HNRPL_HUMAN@97
sp|Q5T8P6|RBM26_HUMAN@792		sp|P00558|PGK1_HUMAN@275		sp|P22234|PUR6_HUMAN@246
sp|P46821|MAP1B_HUMAN@1250		sp|Q13428|TCOF_HUMAN@1078		sp|Q9NZI8|IF2B1_HUMAN@561
sp|Q5IFJ7|RL9_MACFA@2		sp|P08238|HS90B_HUMAN@64		sp|P07814|SYEP_HUMAN@774
sp|Q15061|WDR43_HUMAN@391		sp|Q8WWV3|RT4I1_HUMAN@102		sp|Q9P2I0|CPSF2_HUMAN@459
sp|Q86UE4|LYRIC_HUMAN@547		sp|P13639|EF2_HUMAN@445		sp|P50991|TCPD_HUMAN@29
sp|Q9Y295|DRG1_HUMAN@46		sp|Q5SW79|CE170_HUMAN@798		sp|P56192|SYMC_HUMAN@375
sp|O14653|GOSR2_HUMAN@159		sp|Q9Y3T9|NOC2L_HUMAN@77		sp|P10768|ESTD_HUMAN@209
sp|Q9BQG0|MBB1A_HUMAN@1167		sp|Q9H3K2|GHITM_HUMAN@73		sp|P35998|PRS7_HUMAN@415
sp|Q00839|HNRPU_HUMAN@670		sp|Q14204|DYHC1_HUMAN@2094		sp|Q96E39|RMXL1_HUMAN@47
sp|Q9UKM9|RALY_HUMAN@222		sp|Q9H7N4|SFR19_HUMAN@896		sp|P26232|CTNA2_HUMAN@889
sp|P35579|MYH9_HUMAN@228		sp|P05455|LA_HUMAN@105		sp|Q9Y696|CLIC4_HUMAN@199
sp|P00558|PGK1_HUMAN@191		sp|P09429|HMGB1_HUMAN@7		sp|Q9Y4W6|AFG32_HUMAN@306
sp|O14979|HNRDL_HUMAN@216		sp|Q16658|FSCN1_HUMAN@41		sp|P52732|KIF11_HUMAN@930
sp|P12270|TPR_HUMAN@433		sp|Q9H920|RN121_HUMAN@125		sp|O95347|SMC2_HUMAN@467
sp|Q13428|TCOF_HUMAN@803		sp|Q96EY8|MMAB_HUMAN@61		sp|Q8NBU5|ATAD1_HUMAN@263
sp|Q9NQC3|RTN4_HUMAN@1183		sp|Q9Y4R8|TELO2_HUMAN@291		sp|Q12846|STX4_HUMAN@54
sp|Q13561|DCTN2_HUMAN@229		sp|P38919|IF4A3_HUMAN@314		sp|Q6PJ69|TRI65_HUMAN@206
sp|Q02218|ODO1_HUMAN@899		sp|Q9Y4E1|WAC2C_HUMAN@1153		sp|P78371|TCPB_HUMAN@191
sp|Q14558|KPRA_HUMAN@238		sp|Q14247|SRC8_HUMAN@304		sp|Q6PI48|SYDM_HUMAN@153
sp|Q8NE71|ABCF1_HUMAN@119		sp|P35221|CTNA1_HUMAN@737		sp|Q9BSJ8|ESYT1_HUMAN@493
sp|P20700|LMNB1_HUMAN@483		sp|P51398|RT29_HUMAN@218		sp|O76021|RL1D1_HUMAN@417
sp|P61353|RL27_HUMAN@93		sp|Q14683|SMC1A_HUMAN@796		sp|Q9HAF1|EAF6_HUMAN@91
sp|Q96AE4|FUBP1_HUMAN@209		sp|Q8WUM4|PDC6I_HUMAN@374		sp|P51610|HCFC1_HUMAN@690
sp|P32322|P5CR1_HUMAN@283		sp|P08579|RU2B_HUMAN@93		sp|Q6UW68|TM205_HUMAN@122
sp|P50991|TCPD_HUMAN@288		sp|Q9P2J5|SYLC_HUMAN@270		sp|P23919|KTHY_HUMAN@205
sp|O75947|ATP5H_HUMAN@72		sp|P08195|4F2_HUMAN@257		sp|P07197|NFM_HUMAN@856
sp|O43776|SYNC_HUMAN@99		sp|Q16891|MIC60_HUMAN@110		sp|Q9Y3T9|NOC2L_HUMAN@229
sp|Q96ES7|SGF29_HUMAN@161		sp|O43670|ZN207_HUMAN@100		sp|Q9UL25|RAB21_HUMAN@164
sp|P84095|RHOG_HUMAN@183		sp|P62820|RAB1A_HUMAN@187		sp|P49327|FAS_HUMAN@673
sp|P11142|HSP7C_HUMAN@112		sp|Q96PU8|QKI_HUMAN@190		sp|Q05682|CALD1_HUMAN@659
sp|O60749|SNX2_HUMAN@287		sp|O95347|SMC2_HUMAN@890		sp|Q14008|CKAP5_HUMAN@102
sp|P18124|RL7_HUMAN@9		sp|P45880|VDAC2_HUMAN@43		sp|Q15785|TOM34_HUMAN@272
sp|P19784|CSK22_HUMAN@103		sp|P14635|CCNB1_HUMAN@51		sp|Q9H3U1|UN45A_HUMAN@190
sp|P14618|KPYM_HUMAN@206		sp|P08559|ODPA_HUMAN@321		sp|P48426|PI42A_HUMAN@367
sp|Q96PK6|RBM14_HUMAN@630		sp|P49327|FAS_HUMAN@235		sp|P07195|LDHB_HUMAN@60
sp|P27816|MAP4_HUMAN@802		sp|Q5JRX3|PREP_HUMAN@490		sp|P45877|PPIC_HUMAN@165
sp|P83916|CBX1_HUMAN@139		sp|O76094|SRP72_HUMAN@283		sp|O75643|U520_HUMAN@487
sp|Q99848|EBP2_HUMAN@91		sp|P83731|RL24_HUMAN@61		sp|Q96A08|H2B1A_HUMAN@122
sp|Q5VTE0|EF1A3_HUMAN@273		sp|Q07020|RL18_HUMAN@78		sp|Q13263|TIF1B_HUMAN@188
sp|P41250|GARS_HUMAN@108		sp|Q9UIG0|BAZ1B_HUMAN@1037		sp|Q14980|NUMA1_HUMAN@897
sp|P49792|RBP2_HUMAN@997		sp|P11142|HSP7C_HUMAN@128		REV_sp|P15924|DESP_HUMAN@2162
sp|P12270|TPR_HUMAN@84		sp|Q9UBT2|SAE2_HUMAN@557		sp|Q9NW13|RBM28_HUMAN@169
sp|Q96GQ7|DDX27_HUMAN@418		sp|Q8NC51|SERB1_HUMAN@299		sp|Q9UJU6|DBNL_HUMAN@134
sp|P35249|RFC4_HUMAN@13		sp|Q14839|CHD4_HUMAN@295		sp|P0DMV9|HS71B_HUMAN@246
sp|P13010|XRCC5_HUMAN@334		sp|O15355|PPM1G_HUMAN@339		sp|P60891|PRPS1_HUMAN@194
sp|P04843|RPN1_HUMAN@187		sp|Q99615|DNJC7_HUMAN@41		sp|Q13561|DCTN2_HUMAN@185
sp|Q9H8Y8|GORS2_HUMAN@56		sp|P41252|SYIC_HUMAN@132		sp|Q9Y2L1|RRP44_HUMAN@822
sp|Q15046|SYK_HUMAN@579		REV_sp|O95714|HERC2_HUMAN@585		sp|Q9UHD8|SEPT9_HUMAN@69
sp|O76021|RL1D1_HUMAN@331		sp|P22234|PUR6_HUMAN@19		sp|Q01813|PFKAP_HUMAN@395
sp|Q96L92|SNX27_HUMAN@293		REV_sp|P16403|H12_HUMAN@15		sp|Q96PP4|TSG13_HUMAN@232
sp|Q96AC1|FERM2_HUMAN@533		sp|Q9P2J5|SYLC_HUMAN@983		sp|Q02878|RL6_HUMAN@33
sp|Q00839|HNRPU_HUMAN@688		sp|P04075|ALDOA_HUMAN@322		REV_sp|O60673|REV3L_HUMAN@1534
sp|Q8WZ42|TITIN_HUMAN@10492		sp|P49736|MCM2_HUMAN@742		sp|P68133|ACTS_HUMAN@70
sp|P13639|EF2_HUMAN@314		sp|Q9Y673|ALG5_HUMAN@202		sp|P51812|KS6A3_HUMAN@62
sp|Q15942|ZYX_HUMAN@265		sp|Q15269|PWP2_HUMAN@46		sp|P07954|FUMH_HUMAN@473
sp|O00571|DDX3X_HUMAN@66		sp|Q00059|TFAM_HUMAN@76		sp|Q12905|ILF2_HUMAN@109
sp|O43264|ZW10_HUMAN@777		sp|P26599|PTBP1_HUMAN@271		sp|Q96BR5|COA7_HUMAN@211
sp|Q9NVA2|SEP11_HUMAN@398		REV_sp|Q5IS68|DCE1_PANTR@174		sp|Q13098|CSN1_HUMAN@467
sp|Q5TEC6|H37_HUMAN@24		sp|Q9UMS4|PRP19_HUMAN@64		sp|O95801|TTC4_HUMAN@186
sp|Q8NCN4|RN169_HUMAN@408		sp|P13667|PDIA4_HUMAN@145		sp|Q12906|ILF3_HUMAN@734
sp|P36871|PGM1_HUMAN@172		sp|P61604|CH10_HUMAN@36		sp|P27816|MAP4_HUMAN@769
sp|P12270|TPR_HUMAN@177		sp|Q14204|DYHC1_HUMAN@3480		sp|Q9BPU6|DPYL5_HUMAN@546
sp|P46013|KI67_HUMAN@2178		sp|P06753|TPM3_HUMAN@232		REV_sp|Q96IW2|SHD_HUMAN@152
sp|P12270|TPR_HUMAN@713		sp|Q9UBU9|NXF1_HUMAN@607		sp|Q14676|MDC1_HUMAN@1304
sp|Q14978|NOLC1_HUMAN@33		sp|Q00839|HNRPU_HUMAN@543		sp|Q9P215|POGK_HUMAN@389
sp|Q01780|EXOSX_HUMAN@591		sp|P83731|RL24_HUMAN@131		sp|P11021|BIP_HUMAN@352
sp|P09874|PARP1_HUMAN@949		REV_sp|P37800|L_TOSV@1216		sp|Q9NRL2|BAZ1A_HUMAN@1517
sp|P25705|ATPA_HUMAN@539		sp|P30533|AMRP_HUMAN@323		sp|Q9H1Z4|WDR13_HUMAN@443
sp|Q9ULX3|NOB1_HUMAN@330		sp|O75792|RNH2A_HUMAN@64		sp|P06576|ATPB_HUMAN@124
sp|Q9UBL3|ASH2L_HUMAN@301		REV_sp|P0DTD1|R1AB_SARS2@6360		sp|P46013|KI67_HUMAN@1402
sp|P00918|CAH2_HUMAN@153		sp|P13010|XRCC5_HUMAN@469		sp|Q969V3|NCLN_HUMAN@409
sp|O75874|IDHC_HUMAN@151		sp|Q9UKV3|ACINU_HUMAN@302		sp|P51659|DHB4_HUMAN@614
sp|P61086|UBE2K_HUMAN@18		sp|O76021|RL1D1_HUMAN@337		sp|O43615|TIM44_HUMAN@105
sp|Q13642|FHL1_HUMAN@45		sp|Q15554|TERF2_HUMAN@369		sp|P22033|MUTA_HUMAN@730
sp|Q9UJS0|S2513_HUMAN@669		sp|P54886|P5CS_HUMAN@59		sp|P11172|UMPS_HUMAN@242
sp|P05023|AT1A1_HUMAN@444		sp|P35232|PHB1_HUMAN@208		sp|Q9P0M6|H2AW_HUMAN@239
sp|Q9UNF1|MAGD2_HUMAN@494		sp|P11021|BIP_HUMAN@376		sp|Q5T8D3|ACBD5_HUMAN@469
sp|P06748|NPM_HUMAN@150		sp|P46937|YAP1_HUMAN@321		sp|P25705|ATPA_HUMAN@45
sp|Q92900|RENT1_HUMAN@929		sp|O43765|SGTA_HUMAN@200		sp|Q16891|MIC60_HUMAN@122
sp|P24941|CDK2_HUMAN@250		sp|P53396|ACLY_HUMAN@991		sp|Q9H3K6|BOLA2_HUMAN@47
sp|Q9Y237|PIN4_HUMAN@32		REV_sp|Q7Z7A4|PXK_HUMAN@165		sp|Q9BQ61|TRIR_HUMAN@104
sp|Q92616|GCN1_HUMAN@17		sp|P39019|RS19_HUMAN@7		sp|Q9Y5B9|SP16H_HUMAN@120
sp|A5YKK6|CNOT1_HUMAN@556		sp|Q92922|SMRC1_HUMAN@608		sp|Q7Z434|MAVS_HUMAN@311
sp|P58876|H2B1D_HUMAN@6		sp|P63010|AP2B1_HUMAN@318		sp|P17858|PFKAL_HUMAN@614
sp|Q6PJT7|ZC3HE_HUMAN@337		sp|O96019|ACL6A_HUMAN@379		sp|Q9H910|JUPI2_HUMAN@67
sp|Q14739|LBR_HUMAN@350		sp|Q96AG4|LRC59_HUMAN@73		sp|P07197|NFM_HUMAN@860
sp|P36542|ATPG_HUMAN@43		sp|P14618|KPYM_HUMAN@498		sp|Q00688|FKBP3_HUMAN@80
sp|P16403|H12_HUMAN@127		sp|Q02880|TOP2B_HUMAN@373		sp|Q4V328|GRAP1_HUMAN@448
sp|Q9P0L0|VAPA_HUMAN@211		sp|Q8TEQ6|GEMI5_HUMAN@1436		sp|Q8NBU5|ATAD1_HUMAN@144
sp|Q9NW13|RBM28_HUMAN@478		sp|Q9UBV8|PEF1_HUMAN@260		sp|Q13813|SPTN1_HUMAN@214
sp|P09661|RU2A_HUMAN@179		sp|P19338|NUCL_HUMAN@513		sp|P17812|PYRG1_HUMAN@309
sp|P34931|HS71L_HUMAN@27		sp|Q9P258|RCC2_HUMAN@320		REV_sp|Q8WZ42|TITIN_HUMAN@29866
sp|P53701|CCHL_HUMAN@190		sp|P67809|YBOX1_HUMAN@137		sp|Q14247|SRC8_HUMAN@314
sp|O60841|IF2P_HUMAN@226		sp|P52907|CAZA1_HUMAN@97		sp|Q07864|DPOE1_HUMAN@778
sp|P22234|PUR6_HUMAN@235		sp|P08238|HS90B_HUMAN@624		sp|O14744|ANM5_HUMAN@380
sp|P10809|CH60_HUMAN@369		sp|Q9NVA2|SEP11_HUMAN@366		sp|Q5IS59|RTN1_PANTR@586
sp|P29966|MARCS_HUMAN@105		sp|O00299|CLIC1_HUMAN@131		sp|Q13310|PABP4_HUMAN@375
sp|Q14697|GANAB_HUMAN@908		sp|P33992|MCM5_HUMAN@700		sp|Q15459|SF3A1_HUMAN@708
sp|Q15061|WDR43_HUMAN@491		sp|Q9Y5B9|SP16H_HUMAN@497		sp|Q9H583|HEAT1_HUMAN@1583
sp|P62753|RS6_HUMAN@30		sp|P26358|DNMT1_HUMAN@1607		sp|P55072|TERA_HUMAN@754
sp|Q9HC07|TM165_HUMAN@227		sp|O94925|GLSK_HUMAN@130		sp|Q9NR30|DDX21_HUMAN@18
sp|Q68CZ1|FTM_HUMAN@511		sp|Q99848|EBP2_HUMAN@253		sp|Q8N4P3|MESH1_HUMAN@116
sp|Q8NI27|THOC2_HUMAN@415		sp|Q9H9B4|SFXN1_HUMAN@223		sp|P47897|SYQ_HUMAN@394
sp|Q9HAV4|XPO5_HUMAN@208		sp|Q16543|CDC37_HUMAN@69		REV_sp|Q9NXE8|CWC25_HUMAN@62
sp|P46087|NOP2_HUMAN@772		sp|P13797|PLST_HUMAN@91		sp|P48047|ATPO_HUMAN@60
sp|Q9NTJ3|SMC4_HUMAN@524		sp|Q8N5K1|CISD2_HUMAN@74		sp|P43243|MATR3_HUMAN@478
sp|Q8IWS0|PHF6_HUMAN@273		sp|Q4VCS5|AMOT_HUMAN@481		sp|Q9Y490|TLN1_HUMAN@98
sp|Q99714|HCD2_HUMAN@104		sp|Q8NI27|THOC2_HUMAN@1392		sp|P14999|LT_POVBA@427
sp|P19338|NUCL_HUMAN@398		sp|O76021|RL1D1_HUMAN@356		sp|O43491|E41L2_HUMAN@210
sp|P07305|H10_HUMAN@121		sp|Q5TEC6|H37_HUMAN@15		REV_sp|Q8NHQ1|CEP70_HUMAN@290
sp|Q9Y5J1|UTP18_HUMAN@41		sp|P52907|CAZA1_HUMAN@278		sp|Q02750|MP2K1_HUMAN@59
sp|P30050|RL12_HUMAN@41		sp|Q99698|LYST_HUMAN@1714		sp|Q07065|CKAP4_HUMAN@594
sp|Q9NYF8|BCLF1_HUMAN@332		sp|O00567|NOP56_HUMAN@240		sp|Q5T8P6|RBM26_HUMAN@786
sp|Q14257|RCN2_HUMAN@71		sp|Q8NHP6|MSPD2_HUMAN@293		sp|Q6UVJ0|SAS6_HUMAN@404
sp|Q07866|KLC1_HUMAN@29		sp|Q06830|PRDX1_HUMAN@109		sp|P16615|AT2A2_HUMAN@143
sp|Q13123|RED_HUMAN@137		sp|Q9NZN8|CNOT2_HUMAN@430		sp|Q8NDI1|EHBP1_HUMAN@950
sp|P62750|RL23A_HUMAN@134		REV_sp|P21580|TNAP3_HUMAN@371		sp|P49642|PRI1_HUMAN@326
sp|Q9H0C8|ILKAP_HUMAN@20		sp|P07437|TBB5_HUMAN@58		sp|P80303|NUCB2_HUMAN@77
sp|P12270|TPR_HUMAN@1637		sp|Q92841|DDX17_HUMAN@313		sp|P62917|RL8_HUMAN@144
sp|P60983|GMFB_HUMAN@134		sp|Q14683|SMC1A_HUMAN@734		sp|O43491|E41L2_HUMAN@827
sp|O15347|HMGB3_HUMAN@7		sp|P48444|COPD_HUMAN@347		sp|Q9BTU6|P4K2A_HUMAN@243
sp|P29401|TKT_HUMAN@260		sp|P62906|RL10A_HUMAN@56		sp|Q9NUG6|PDRG1_HUMAN@125
sp|P41091|IF2G_HUMAN@196		sp|P13639|EF2_HUMAN@333		sp|Q8IYB3|SRRM1_HUMAN@763
sp|P51659|DHB4_HUMAN@68		sp|P61011|SRP54_HUMAN@92		sp|O95182|NDUA7_HUMAN@40
sp|P60520|GBRL2_HUMAN@46		sp|P48643|TCPE_HUMAN@265		sp|P49368|TCPG_HUMAN@31
sp|P49591|SYSC_HUMAN@12		sp|P08397|HEM3_HUMAN@27		sp|Q8TEQ6|GEMI5_HUMAN@524
sp|P52294|IMA5_HUMAN@105		sp|Q04637|IF4G1_HUMAN@602		sp|O15511|ARPC5_HUMAN@67
sp|Q9UG63|ABCF2_HUMAN@608		sp|Q9NY33|DPP3_HUMAN@264		sp|P31946|1433B_HUMAN@124
sp|O95831|AIFM1_HUMAN@278		sp|Q17R31|TATD3_HUMAN@138		sp|Q14694|UBP10_HUMAN@662
sp|O43615|TIM44_HUMAN@312		sp|P05455|LA_HUMAN@86		sp|Q8WUA2|PPIL4_HUMAN@383
sp|P54577|SYYC_HUMAN@334		sp|Q02878|RL6_HUMAN@8		sp|Q6ZMV7|LEKR1_HUMAN@45
sp|P83731|RL24_HUMAN@147		sp|Q9Y5B9|SP16H_HUMAN@81		sp|Q9NZI8|IF2B1_HUMAN@272
sp|P16615|AT2A2_HUMAN@683		sp|P10412|H14_HUMAN@160		sp|Q06265|EXOS9_HUMAN@21
sp|Q9Y237|PIN4_HUMAN@75		sp|O00299|CLIC1_HUMAN@49		sp|Q05682|CALD1_HUMAN@664
sp|P62906|RL10A_HUMAN@152		sp|P50990|TCPQ_HUMAN@534		sp|Q9UHA3|RLP24_HUMAN@125
sp|Q9NQR4|NIT2_HUMAN@68		sp|P09543|CN37_HUMAN@204		sp|Q99956|DUS9_HUMAN@321
sp|Q92499|DDX1_HUMAN@82		sp|P52272|HNRPM_HUMAN@48		sp|Q9HD20|AT131_HUMAN@555
sp|Q99798|ACON_HUMAN@520		sp|P84098|RL19_HUMAN@190		sp|Q9Y3F4|STRAP_HUMAN@137
sp|Q16629|SRSF7_HUMAN@24		sp|Q12904|AIMP1_HUMAN@267		sp|P40926|MDHM_HUMAN@165
sp|Q5SSJ5|HP1B3_HUMAN@473		sp|Q00610|CLH1_HUMAN@245		sp|P25705|ATPA_HUMAN@239
sp|Q06323|PSME1_HUMAN@187		sp|P98175|RBM10_HUMAN@881		sp|Q14203|DCTN1_HUMAN@722
sp|P08195|4F2_HUMAN@147		sp|P16403|H12_HUMAN@206		sp|Q8IWJ2|GCC2_HUMAN@939
sp|Q9Y679|AUP1_HUMAN@250		sp|P13010|XRCC5_HUMAN@265		sp|Q9Y490|TLN1_HUMAN@1917
sp|O95202|LETM1_HUMAN@133		sp|P20585|MSH3_HUMAN@695		sp|P08243|ASNS_HUMAN@511
sp|P20290|BTF3_HUMAN@177		sp|Q15459|SF3A1_HUMAN@702		sp|O15042|SR140_HUMAN@336
sp|Q9UBE0|SAE1_HUMAN@208		sp|P12270|TPR_HUMAN@364		sp|P37837|TALDO_HUMAN@130
sp|P35579|MYH9_HUMAN@1802		sp|Q9BTE7|DCNL5_HUMAN@124		sp|Q1KMD3|HNRL2_HUMAN@26
sp|Q9H0A0|NAT10_HUMAN@689		REV_sp|Q9HCE1|MOV10_HUMAN@143		sp|Q15075|EEA1_HUMAN@1178
sp|Q13428|TCOF_HUMAN@253		sp|P13639|EF2_HUMAN@439		sp|Q8N1G2|CMTR1_HUMAN@628
sp|P35241|RADI_HUMAN@526		sp|Q9H6F5|CCD86_HUMAN@215		sp|Q96I99|SUCB2_HUMAN@386
sp|Q9NVA2|SEP11_HUMAN@190		sp|Q8WTT2|NOC3L_HUMAN@68		sp|Q9Y285|SYFA_HUMAN@315
sp|Q4VCS5|AMOT_HUMAN@464		sp|Q9UNZ5|L10K_HUMAN@81		sp|Q9H2G2|SLK_HUMAN@1061
sp|Q8IY18|SMC5_HUMAN@542		sp|Q15024|EXOS7_HUMAN@116		sp|Q17RW2|COOA1_HUMAN@392
sp|P23284|PPIB_HUMAN@41		sp|Q14684|RRP1B_HUMAN@204		sp|P36776|LONM_HUMAN@714
sp|P56134|ATPK_HUMAN@59		sp|Q15185|TEBP_HUMAN@33		sp|Q9Y6E2|5MP1_HUMAN@6
sp|P50990|TCPQ_HUMAN@466		sp|P33176|KINH_HUMAN@237		sp|O75116|ROCK2_HUMAN@1351
sp|P17812|PYRG1_HUMAN@103		sp|P34932|HSP74_HUMAN@798		sp|P62834|RAP1A_HUMAN@173
sp|P09601|HMOX1_HUMAN@243		sp|Q96PK6|RBM14_HUMAN@149		sp|P30040|ERP29_HUMAN@182
sp|P46060|RAGP1_HUMAN@172		sp|Q9Y266|NUDC_HUMAN@315		sp|Q9NTK5|OLA1_HUMAN@242
sp|Q00765|REEP5_HUMAN@172		sp|Q8NC51|SERB1_HUMAN@310		sp|Q14683|SMC1A_HUMAN@874
sp|Q9Y6D6|BIG1_HUMAN@18		sp|Q7KZF4|SND1_HUMAN@339		sp|Q8WW01|SEN15_HUMAN@124
sp|P35606|COPB2_HUMAN@783		sp|P31153|METK2_HUMAN@367		sp|P18077|RL35A_HUMAN@54
sp|O60832|DKC1_HUMAN@443		sp|Q04637|IF4G1_HUMAN@1234		sp|P02786|TFR1_HUMAN@371
sp|Q14696|MESD_HUMAN@100		sp|Q14444|CAPR1_HUMAN@74		sp|Q7Z6Z7|HUWE1_HUMAN@1107
sp|P35659|DEK_HUMAN@284		sp|P38117|ETFB_HUMAN@110		sp|P11441|UBL4A_HUMAN@66
sp|P35658|NU214_HUMAN@1309		sp|P46777|RL5_HUMAN@188		sp|Q9UIA9|XPO7_HUMAN@338
sp|Q9UMS4|PRP19_HUMAN@122		sp|O94906|PRP6_HUMAN@324		sp|P61927|RL37_HUMAN@68
sp|Q9Y3U8|RL36_HUMAN@23		REV_sp|Q6GWS6|L_LASV@1181		sp|Q9UL46|PSME2_HUMAN@180
sp|Q01813|PFKAP_HUMAN@688		sp|Q9BRJ2|RM45_HUMAN@102		sp|Q86VM9|ZCH18_HUMAN@908
sp|P50990|TCPQ_HUMAN@459		sp|B5ME19|EIFCL_HUMAN@628		sp|P53985|MOT1_HUMAN@462
sp|Q8IUE6|H2A2B_HUMAN@10		sp|P78527|PRKDC_HUMAN@2970		sp|Q9HB71|CYBP_HUMAN@123
sp|Q9P258|RCC2_HUMAN@124		sp|Q68DA7|FMN1_HUMAN@1309		sp|Q9H583|HEAT1_HUMAN@248
REV_sp|P28290|ITPI2_HUMAN@1043		sp|P11142|HSP7C_HUMAN@56		sp|P05783|K1C18_HUMAN@187
sp|Q10469|MGAT2_HUMAN@226		sp|Q9P258|RCC2_HUMAN@188		sp|P23497|SP100_HUMAN@762
sp|P49368|TCPG_HUMAN@425		sp|Q96G01|BICD1_HUMAN@330		sp|O60762|DPM1_HUMAN@197
sp|Q12905|ILF2_HUMAN@45		sp|Q6UX04|CWC27_HUMAN@126		sp|O00165|HAX1_HUMAN@218
sp|Q5VTE0|EF1A3_HUMAN@172		sp|P61247|RS3A_HUMAN@195		REV_sp|Q8N3K9|CMYA5_HUMAN@3745
sp|Q9H223|EHD4_HUMAN@471		sp|P18077|RL35A_HUMAN@29		sp|P13639|EF2_HUMAN@594
sp|P83731|RL24_HUMAN@27		sp|Q14203|DCTN1_HUMAN@38		sp|P49721|PSB2_HUMAN@198
sp|O15371|EIF3D_HUMAN@53		sp|Q92522|H1X_HUMAN@42		sp|P55196|AFAD_HUMAN@1186
sp|P17066|HSP76_HUMAN@453		sp|P46940|IQGA1_HUMAN@773		sp|Q15185|TEBP_HUMAN@95
sp|Q99700|ATX2_HUMAN@320		sp|O75937|DNJC8_HUMAN@143		sp|Q14137|BOP1_HUMAN@711
sp|P35998|PRS7_HUMAN@418		sp|Q8WZ42|TITIN_HUMAN@2157		sp|Q92878|RAD50_HUMAN@909
sp|P23193|TCEA1_HUMAN@199		sp|O14979|HNRDL_HUMAN@162		sp|Q15233|NONO_HUMAN@126
sp|P35659|DEK_HUMAN@291		sp|P62917|RL8_HUMAN@188		sp|Q92598|HS105_HUMAN@471
sp|Q9H3P2|NELFA_HUMAN@181		sp|Q96AG4|LRC59_HUMAN@215		sp|P34931|HS71L_HUMAN@514
sp|Q08752|PPID_HUMAN@331		sp|Q92878|RAD50_HUMAN@230		sp|P55060|XPO2_HUMAN@17
sp|O15347|HMGB3_HUMAN@174		sp|P34931|HS71L_HUMAN@253		REV_sp|Q9Y6J0|CABIN_HUMAN@2023
sp|P10809|CH60_HUMAN@202		sp|Q13242|SRSF9_HUMAN@169		sp|P13073|COX41_HUMAN@29
sp|O75475|PSIP1_HUMAN@100		sp|P62266|RS23_HUMAN@108		sp|P29966|MARCS_HUMAN@152
sp|Q14254|FLOT2_HUMAN@305		sp|Q9H9B4|SFXN1_HUMAN@202		sp|P62826|RAN_HUMAN@60
sp|P25705|ATPA_HUMAN@230		sp|Q9GZT8|NIF3L_HUMAN@229		sp|Q99714|HCD2_HUMAN@52
sp|Q14152|EIF3A_HUMAN@308		sp|Q9Y3B3|TMED7_HUMAN@83		sp|P05387|RLA2_HUMAN@94
sp|Q9UHD8|SEPT9_HUMAN@186		sp|P11171|EPB41_HUMAN@497		sp|O43175|SERA_HUMAN@364
sp|P15170|ERF3A_HUMAN@71		sp|P18621|RL17_HUMAN@167		sp|Q86WJ1|CHD1L_HUMAN@310
sp|Q96AE4|FUBP1_HUMAN@64		sp|Q9Y5K5|UCHL5_HUMAN@234		sp|Q9UBB4|ATX10_HUMAN@237
sp|Q86VM9|ZCH18_HUMAN@661		sp|O75419|CDC45_HUMAN@528		sp|P48735|IDHP_HUMAN@106
sp|P11388|TOP2A_HUMAN@425		sp|Q9Y4L1|HYOU1_HUMAN@722		sp|Q6UVJ0|SAS6_HUMAN@400
sp|P61769|B2MG_HUMAN@111		sp|Q9UJY5|GGA1_HUMAN@101		sp|O00479|HMGN4_HUMAN@51
sp|O15519|CFLAR_HUMAN@69		sp|P13667|PDIA4_HUMAN@407		sp|P16401|H15_HUMAN@130
sp|Q07666|KHDR1_HUMAN@165		sp|P36957|ODO2_HUMAN@217		sp|O00560|SDCB1_HUMAN@109
sp|Q99798|ACON_HUMAN@736		sp|P11388|TOP2A_HUMAN@1433		sp|O95347|SMC2_HUMAN@706
sp|Q14684|RRP1B_HUMAN@742		REV_sp|Q15650|TRIP4_HUMAN@257		sp|P78527|PRKDC_HUMAN@205
sp|Q96CS3|FAF2_HUMAN@367		sp|O43447|PPIH_HUMAN@38		sp|Q99459|CDC5L_HUMAN@432
sp|P62937|PPIA_HUMAN@82		sp|P49448|DHE4_HUMAN@187		sp|Q9BXS5|AP1M1_HUMAN@326
sp|P62851|RS25_HUMAN@25		sp|Q6PI48|SYDM_HUMAN@133		sp|Q9H410|DSN1_HUMAN@248
sp|Q14204|DYHC1_HUMAN@4406		sp|P62917|RL8_HUMAN@181		sp|P13667|PDIA4_HUMAN@543
sp|P22102|PUR2_HUMAN@404		sp|P38159|RBMX_HUMAN@47		sp|Q96N23|CFA54_HUMAN@2960
sp|P26038|MOES_HUMAN@3		sp|O15347|HMGB3_HUMAN@165		sp|Q6P996|PDXD1_HUMAN@252
sp|O00330|ODPX_HUMAN@172		sp|P24539|AT5F1_HUMAN@131		sp|Q9Y305|ACOT9_HUMAN@237
sp|P00558|PGK1_HUMAN@131		sp|Q8N766|EMC1_HUMAN@52		sp|Q99848|EBP2_HUMAN@33
sp|P48047|ATPO_HUMAN@70		sp|P78347|GTF2I_HUMAN@94		sp|Q9NY61|AATF_HUMAN@264
sp|P34932|HSP74_HUMAN@134		REV_sp|Q92608|DOCK2_HUMAN@959		sp|Q9UNH7|SNX6_HUMAN@307
sp|Q9H3P2|NELFA_HUMAN@371		sp|Q8IUE6|H2A2B_HUMAN@120		sp|O00273|DFFA_HUMAN@248
sp|Q92928|RAB1C_HUMAN@128		sp|P78417|GSTO1_HUMAN@160		sp|Q9UNZ2|NSF1C_HUMAN@356
sp|P11387|TOP1_HUMAN@687		sp|Q9UNL2|SSRG_HUMAN@87		sp|P16401|H15_HUMAN@197
sp|P12270|TPR_HUMAN@159		sp|Q05682|CALD1_HUMAN@733		sp|Q9NYF8|BCLF1_HUMAN@593
sp|P35611|ADDA_HUMAN@140		sp|P50851|LRBA_HUMAN@1806		sp|Q7Z406|MYH14_HUMAN@103
REV_sp|Q63HN8|RN213_HUMAN@1048		sp|Q9BR61|ACBD6_HUMAN@120		sp|P24539|AT5F1_HUMAN@126
sp|Q9Y230|RUVB2_HUMAN@157		sp|Q15785|TOM34_HUMAN@175		sp|Q9NUP9|LIN7C_HUMAN@111
sp|Q5T5Y3|CAMP1_HUMAN@1108		REV_sp|Q9P2Q2|FRM4A_HUMAN@680		sp|Q8WXA9|SREK1_HUMAN@146
sp|P49792|RBP2_HUMAN@1848		REV_sp|P30622|CLIP1_HUMAN@850		sp|Q15020|SART3_HUMAN@435
sp|P06753|TPM3_HUMAN@249		sp|Q12996|CSTF3_HUMAN@274		sp|Q15005|SPCS2_HUMAN@71
sp|P23284|PPIB_HUMAN@129		sp|P09874|PARP1_HUMAN@940		sp|Q8WWK9|CKAP2_HUMAN@294
sp|P50454|SERPH_HUMAN@94		sp|P02786|TFR1_HUMAN@53		sp|P78527|PRKDC_HUMAN@1147
sp|P30405|PPIF_HUMAN@182		sp|O75947|ATP5H_HUMAN@78		sp|P11586|C1TC_HUMAN@71
sp|P13667|PDIA4_HUMAN@484		sp|Q06203|PUR1_HUMAN@372		sp|Q96EX1|SIM12_HUMAN@75
sp|Q9NX58|LYAR_HUMAN@320		sp|Q99832|TCPH_HUMAN@320		sp|O75844|FACE1_HUMAN@429
sp|P02545|LMNA_HUMAN@378		sp|Q00688|FKBP3_HUMAN@94		sp|Q96RQ9|OXLA_HUMAN@442
sp|P13797|PLST_HUMAN@447		sp|O94826|TOM70_HUMAN@359		sp|O14646|CHD1_HUMAN@1181
sp|Q05519|SRS11_HUMAN@211		REV_sp|Q99590|SCAFB_HUMAN@88		sp|Q5TC12|ATPF1_HUMAN@140
sp|P35610|SOAT1_HUMAN@45		sp|Q96AG4|LRC59_HUMAN@71		sp|O95347|SMC2_HUMAN@114
sp|Q13428|TCOF_HUMAN@746		sp|Q15393|SF3B3_HUMAN@137		sp|P52815|RM12_HUMAN@142
sp|Q12931|TRAP1_HUMAN@67		sp|Q15084|PDIA6_HUMAN@160		sp|O60870|KIN17_HUMAN@391
sp|Q03252|LMNB2_HUMAN@298		sp|Q13901|C1D_HUMAN@46		sp|P07814|SYEP_HUMAN@1503
sp|P09874|PARP1_HUMAN@600		sp|P23588|IF4B_HUMAN@577		sp|P00390|GSHR_HUMAN@296
sp|P61160|ARP2_HUMAN@46		REV_sp|A0A7H0DNH0|PG003_MONPV@46		sp|P35269|T2FA_HUMAN@498
sp|P35520|CBS_HUMAN@481		sp|Q96QC0|PP1RA_HUMAN@26		sp|Q96HE7|ERO1A_HUMAN@455
sp|Q8WXX5|DNJC9_HUMAN@217		sp|O60264|SMCA5_HUMAN@644		sp|P16402|H13_HUMAN@128
sp|P04843|RPN1_HUMAN@553		sp|P50914|RL14_HUMAN@182		sp|P22234|PUR6_HUMAN@53
sp|Q9UPN3|MACF1_HUMAN@859		sp|P23396|RS3_HUMAN@202		REV_sp|Q86YF9|DZIP1_HUMAN@555
sp|P61978|HNRPK_HUMAN@60		sp|Q96KR1|ZFR_HUMAN@354		sp|P12956|XRCC6_HUMAN@553
sp|P07237|PDIA1_HUMAN@114		sp|Q9Y3D6|FIS1_HUMAN@25		REV_sp|Q15147|PLCB4_HUMAN@239
sp|P30559|OXYR_HUMAN@364		sp|O15213|WDR46_HUMAN@553		sp|Q9Y2D0|CAH5B_HUMAN@249
sp|P05114|HMGN1_HUMAN@53		sp|Q29RF7|PDS5A_HUMAN@1324		sp|Q9UNY4|TTF2_HUMAN@422
sp|Q8NCW5|NNRE_HUMAN@246		sp|Q5JPB2|ZN831_HUMAN@1287		sp|P25789|PSA4_HUMAN@199
sp|Q96HY7|DHTK1_HUMAN@188		sp|Q99459|CDC5L_HUMAN@694		sp|Q86UV5|UBP48_HUMAN@956
sp|P13995|MTDC_HUMAN@194		sp|Q13618|CUL3_HUMAN@700		sp|Q9Y2T2|AP3M1_HUMAN@388
sp|P03243|E1B55_ADE05@101		sp|Q86UP2|KTN1_HUMAN@265		sp|Q8NC51|SERB1_HUMAN@236
sp|P45880|VDAC2_HUMAN@72		sp|P14999|LT_POVBA@513		sp|P53618|COPB_HUMAN@107
sp|P51572|BAP31_HUMAN@192		sp|Q16851|UGPA_HUMAN@69		sp|Q9NVA1|UQCC1_HUMAN@288
sp|P22626|ROA2_HUMAN@104		sp|Q9NTK5|OLA1_HUMAN@354		sp|Q12996|CSTF3_HUMAN@547
sp|Q4G0J3|LARP7_HUMAN@181		sp|P55263|ADK_HUMAN@264		sp|P17480|UBF1_HUMAN@352
sp|Q9Y2X3|NOP58_HUMAN@99		sp|Q15061|WDR43_HUMAN@391		sp|Q15008|PSMD6_HUMAN@117
sp|P42126|ECI1_HUMAN@283		sp|Q86UE4|LYRIC_HUMAN@547		sp|P15121|ALDR_HUMAN@263
sp|Q9UHB6|LIMA1_HUMAN@210		sp|Q7Z739|YTHD3_HUMAN@399		sp|Q9NTI2|AT8A2_HUMAN@809
sp|P0DMR1|HNRC4_HUMAN@191		sp|Q5JQF8|PAP1M_HUMAN@86		REV_sp|Q6ZMZ3|SYNE3_HUMAN@473
sp|Q6PJT7|ZC3HE_HUMAN@84		sp|P26639|SYTC_HUMAN@75		REV_sp|Q7Z7G8|VP13B_HUMAN@3980
sp|Q9P016|THYN1_HUMAN@24		sp|Q9BQG0|MBB1A_HUMAN@1167		sp|Q7Z422|SZRD1_HUMAN@86
sp|P27694|RFA1_HUMAN@111		sp|Q00610|CLH1_HUMAN@506		sp|O00170|AIP_HUMAN@66
sp|P06748|NPM_HUMAN@250		sp|Q00839|HNRPU_HUMAN@670		sp|P46087|NOP2_HUMAN@644
sp|Q9BQE3|TBA1C_HUMAN@370		sp|P31942|HNRH3_HUMAN@76		sp|O75369|FLNB_HUMAN@681
sp|Q15942|ZYX_HUMAN@328		sp|Q96KR1|ZFR_HUMAN@415		sp|Q00610|CLH1_HUMAN@1516
sp|P04075|ALDOA_HUMAN@317		sp|Q5VIR6|VPS53_HUMAN@253		sp|O75643|U520_HUMAN@177
sp|Q14697|GANAB_HUMAN@220		REV_sp|Q9Y5Y9|SCNAA_HUMAN@1712		sp|P25705|ATPA_HUMAN@194
sp|Q3LXA3|TKFC_HUMAN@487		sp|P00558|PGK1_HUMAN@191		sp|Q8N5X7|IF4E3_HUMAN@127
sp|P12081|HARS1_HUMAN@418		sp|O14979|HNRDL_HUMAN@216		sp|Q01085|TIAR_HUMAN@122
sp|P55786|PSA_HUMAN@712		sp|Q9ULS5|TMCC3_HUMAN@117		sp|Q14203|DCTN1_HUMAN@944
sp|O14949|QCR8_HUMAN@82		sp|Q92598|HS105_HUMAN@585		sp|P00558|PGK1_HUMAN@267
sp|Q15365|PCBP1_HUMAN@31		sp|P12270|TPR_HUMAN@433		sp|O75663|TIPRL_HUMAN@126
sp|P12236|ADT3_HUMAN@147		sp|Q13428|TCOF_HUMAN@803		sp|Q12931|TRAP1_HUMAN@181
sp|Q13308|PTK7_HUMAN@636		sp|Q9NQC3|RTN4_HUMAN@1183		sp|P55786|PSA_HUMAN@163
sp|Q9UJZ1|STML2_HUMAN@254		sp|Q7Z434|MAVS_HUMAN@7		sp|P11142|HSP7C_HUMAN@246
sp|Q9ULW0|TPX2_HUMAN@357		sp|Q6YN16|HSDL2_HUMAN@32		sp|O94826|TOM70_HUMAN@188
sp|P07814|SYEP_HUMAN@300		sp|Q9NTI5|PDS5B_HUMAN@121		sp|Q9Y2L1|RRP44_HUMAN@906
sp|P78417|GSTO1_HUMAN@143		sp|O14497|ARI1A_HUMAN@1093		sp|Q9Y230|RUVB2_HUMAN@186
sp|P12081|HARS1_HUMAN@42		sp|Q14558|KPRA_HUMAN@238		sp|P48735|IDHP_HUMAN@48
sp|Q9NWH9|SLTM_HUMAN@401		sp|Q86U44|MTA70_HUMAN@27		sp|Q9UII2|ATIF1_HUMAN@49
sp|Q562R1|ACTBL_HUMAN@62		sp|Q5T9A4|ATD3B_HUMAN@44		sp|Q13045|FLII_HUMAN@1007
sp|P54136|SYRC_HUMAN@393		sp|P20700|LMNB1_HUMAN@483		sp|Q8IV33|K0825_HUMAN@1176
sp|P16949|STMN1_HUMAN@95		sp|P08238|HS90B_HUMAN@428		sp|A0FGR8|ESYT2_HUMAN@384
sp|P53621|COPA_HUMAN@1134		sp|P61353|RL27_HUMAN@93		sp|Q16643|DREB_HUMAN@271
sp|Q6PJT7|ZC3HE_HUMAN@139		sp|O14929|HAT1_HUMAN@21		sp|P19367|HXK1_HUMAN@501
REV_sp|Q2VWP7|PRTG_HUMAN@90		sp|P50991|TCPD_HUMAN@288		sp|P09525|ANXA4_HUMAN@218
sp|O95402|MED26_HUMAN@71		sp|O75947|ATP5H_HUMAN@72		sp|Q92572|AP3S1_HUMAN@193
sp|Q9BQ75|CMS1_HUMAN@88		sp|O43776|SYNC_HUMAN@99		sp|Q13509|TBB3_HUMAN@362
sp|P35520|CBS_HUMAN@82		sp|O60869|EDF1_HUMAN@79		sp|P50991|TCPD_HUMAN@65
sp|P18206|VINC_HUMAN@802		sp|Q96ES7|SGF29_HUMAN@161		sp|Q8IYB3|SRRM1_HUMAN@145
sp|Q9Y2L1|RRP44_HUMAN@627		sp|Q92499|DDX1_HUMAN@317		sp|O60812|HNRC1_HUMAN@89
sp|P30040|ERP29_HUMAN@230		sp|O43390|HNRPR_HUMAN@414		sp|Q7Z6E9|RBBP6_HUMAN@1207
sp|P67936|TPM4_HUMAN@13		sp|P11142|HSP7C_HUMAN@112		sp|P09936|UCHL1_HUMAN@78
sp|Q06830|PRDX1_HUMAN@185		sp|P09622|DLDH_HUMAN@143		sp|Q9UBD5|ORC3_HUMAN@96
sp|P35268|RL22_HUMAN@69		sp|P18124|RL7_HUMAN@9		sp|O60684|IMA7_HUMAN@18
sp|P55265|DSRAD_HUMAN@326		REV_sp|Q8WZ42|TITIN_HUMAN@10377		sp|P53396|ACLY_HUMAN@148
sp|Q96IX5|ATPMK_HUMAN@56		sp|P19784|CSK22_HUMAN@103		sp|P52948|NUP98_HUMAN@1413
sp|Q6Y7W6|GGYF2_HUMAN@733		REV_sp|Q8NEE8|TTC16_HUMAN@823		sp|Q8IXB1|DJC10_HUMAN@392
sp|P36543|VATE1_HUMAN@107		sp|P14618|KPYM_HUMAN@206		sp|L0R6Q1|S35U4_HUMAN@18
sp|P53990|IST1_HUMAN@303		sp|Q96PK6|RBM14_HUMAN@630		sp|O00469|PLOD2_HUMAN@153
sp|P08670|VIME_HUMAN@139		sp|P09874|PARP1_HUMAN@524		sp|Q8N684|CPSF7_HUMAN@154
sp|Q01085|TIAR_HUMAN@79		sp|P27816|MAP4_HUMAN@802		sp|Q9P013|CWC15_HUMAN@18
sp|P12270|TPR_HUMAN@1489		sp|P83916|CBX1_HUMAN@139		sp|O15460|P4HA2_HUMAN@71
sp|Q9Y265|RUVB1_HUMAN@268		sp|Q96ST3|SIN3A_HUMAN@396		sp|P27797|CALR_HUMAN@209
sp|Q14204|DYHC1_HUMAN@184		sp|Q14320|FA50A_HUMAN@82		sp|P16402|H13_HUMAN@111
sp|P05387|RLA2_HUMAN@25		sp|Q9BVJ6|UT14A_HUMAN@466		sp|O75400|PR40A_HUMAN@196
sp|O00566|MPP10_HUMAN@189		sp|Q5VTE0|EF1A3_HUMAN@273		sp|Q66431|L_DUGBA@417
sp|P30049|ATPD_HUMAN@165		sp|Q9NZI8|IF2B1_HUMAN@566		sp|Q96JN2|CC136_HUMAN@1024
sp|P14618|KPYM_HUMAN@135		REV_sp|Q8TBX8|PI42C_HUMAN@32		sp|P78371|TCPB_HUMAN@154
sp|Q15942|ZYX_HUMAN@279		sp|Q00610|CLH1_HUMAN@851		sp|Q6ZQQ6|WDR87_HUMAN@2194
sp|P16401|H15_HUMAN@55		sp|P41250|GARS_HUMAN@108		sp|P99999|CYC_HUMAN@74
sp|Q8NC51|SERB1_HUMAN@320		sp|P49792|RBP2_HUMAN@997		sp|Q96FJ2|DYL2_HUMAN@36
sp|P62807|H2B1C_HUMAN@12		sp|P50990|TCPQ_HUMAN@367		sp|Q9HAV7|GRPE1_HUMAN@94
sp|Q96T58|MINT_HUMAN@2066		sp|P38159|RBMX_HUMAN@163		sp|Q96T58|MINT_HUMAN@338
sp|Q8TBC4|UBA3_HUMAN@409		sp|P12270|TPR_HUMAN@84		REV_sp|P27912|POLG_DEN1A@658
sp|P53041|PPP5_HUMAN@40		sp|Q13427|PPIG_HUMAN@650		sp|Q86UP2|KTN1_HUMAN@345
sp|P45880|VDAC2_HUMAN@126		sp|Q14204|DYHC1_HUMAN@1115		sp|O60664|PLIN3_HUMAN@289
REV_sp|O43166|SI1L1_HUMAN@447		sp|P04114|APOB_HUMAN@2147		sp|P27816|MAP4_HUMAN@1015
sp|Q59GN2|R39L5_HUMAN@34		sp|Q96GQ7|DDX27_HUMAN@418		sp|Q9C0J8|WDR33_HUMAN@956
sp|Q9H944|MED20_HUMAN@202		REV_sp|Q8IUD2|RB6I2_HUMAN@838		sp|P13639|EF2_HUMAN@275
sp|Q86V81|THOC4_HUMAN@164		sp|Q9BTE7|DCNL5_HUMAN@139		sp|P78344|IF4G2_HUMAN@520
sp|Q9NXG2|THUM1_HUMAN@272		sp|Q9Y520|PRC2C_HUMAN@1045		sp|Q96DM3|RMC1_HUMAN@192
sp|P26373|RL13_HUMAN@145		sp|P35249|RFC4_HUMAN@13		sp|Q13573|SNW1_HUMAN@193
REV_sp|Q13023|AKAP6_HUMAN@1781		sp|P61353|RL27_HUMAN@27		sp|O15111|IKKA_HUMAN@569
sp|Q14157|UBP2L_HUMAN@1071		sp|Q13217|DNJC3_HUMAN@438		sp|O14654|IRS4_HUMAN@202
sp|O14602|IF1AY_HUMAN@88		sp|P04843|RPN1_HUMAN@187		sp|O00762|UBE2C_HUMAN@163
sp|P49916|DNLI3_HUMAN@193		sp|Q9UK45|LSM7_HUMAN@21		sp|Q8IVD9|NUDC3_HUMAN@332
sp|Q13217|DNJC3_HUMAN@133		sp|O60506|HNRPQ_HUMAN@363		sp|P31948|STIP1_HUMAN@337
sp|P40429|RL13A_HUMAN@114		sp|O76021|RL1D1_HUMAN@331		sp|P50395|GDIB_HUMAN@364
sp|Q8N5M4|TTC9C_HUMAN@109		sp|Q96L92|SNX27_HUMAN@293		sp|P09661|RU2A_HUMAN@3
sp|O94925|GLSK_HUMAN@121		sp|Q13451|FKBP5_HUMAN@252		sp|Q9UIJ7|KAD3_HUMAN@64
sp|Q7L1Q6|5MP2_HUMAN@309		sp|P0DME0|SETLP_HUMAN@82		sp|Q5VTE0|EF1A3_HUMAN@395
sp|Q9Y2W1|TR150_HUMAN@461		sp|Q49A26|GLYR1_HUMAN@135		sp|Q9NTJ3|SMC4_HUMAN@556
sp|O75643|U520_HUMAN@1421		sp|Q96AC1|FERM2_HUMAN@533		sp|Q969S9|RRF2M_HUMAN@218
sp|Q9NRG9|AAAS_HUMAN@56		sp|Q9NQ94|A1CF_HUMAN@157		sp|Q9Y490|TLN1_HUMAN@1960
sp|P43897|EFTS_HUMAN@183		sp|Q00839|HNRPU_HUMAN@688		sp|P04843|RPN1_HUMAN@587
sp|P36776|LONM_HUMAN@896		sp|P13639|EF2_HUMAN@314		sp|P60953|CDC42_HUMAN@133
sp|Q5VT52|RPRD2_HUMAN@118		sp|O00571|DDX3X_HUMAN@66		sp|P0DMV9|HS71B_HUMAN@108
sp|Q9UK45|LSM7_HUMAN@9		sp|Q9Y3F4|STRAP_HUMAN@164		sp|Q9NX63|MIC19_HUMAN@45
sp|O95602|RPA1_HUMAN@252		sp|O43264|ZW10_HUMAN@777		sp|P49750|YLPM1_HUMAN@317
sp|P13667|PDIA4_HUMAN@111		sp|Q5TEC6|H37_HUMAN@24		sp|Q9NVI1|FANCI_HUMAN@339
sp|O43447|PPIH_HUMAN@153		sp|O60725|ICMT_HUMAN@281		sp|Q9C0B1|FTO_HUMAN@88
sp|P78527|PRKDC_HUMAN@1857		sp|P10155|RO60_HUMAN@52		sp|Q6YN16|HSDL2_HUMAN@87
sp|P36578|RL4_HUMAN@368		sp|P12270|TPR_HUMAN@177		sp|Q7LBC6|KDM3B_HUMAN@1327
sp|P04406|G3P_HUMAN@145		sp|P46013|KI67_HUMAN@2178		sp|P30101|PDIA3_HUMAN@422
sp|P16402|H13_HUMAN@160		sp|P62917|RL8_HUMAN@60		sp|P53350|PLK1_HUMAN@338
sp|P04075|ALDOA_HUMAN@330		sp|Q9H2G2|SLK_HUMAN@905		sp|Q99623|PHB2_HUMAN@236
sp|Q15008|PSMD6_HUMAN@372		sp|O75683|SURF6_HUMAN@66		sp|Q02790|FKBP4_HUMAN@274
sp|Q15149|PLEC_HUMAN@4152		sp|P12270|TPR_HUMAN@713		sp|Q9Y333|LSM2_HUMAN@88
sp|P33991|MCM4_HUMAN@752		sp|Q14978|NOLC1_HUMAN@33		sp|Q9UPU7|TBD2B_HUMAN@299
sp|Q13164|MK07_HUMAN@84		sp|O75223|GGCT_HUMAN@50		sp|Q7Z4V5|HDGR2_HUMAN@6
sp|Q5T8P6|RBM26_HUMAN@523		sp|P23381|SYWC_HUMAN@102		sp|Q96EY1|DNJA3_HUMAN@119
sp|Q92878|RAD50_HUMAN@343		sp|P22234|PUR6_HUMAN@116		sp|O14737|PDCD5_HUMAN@105
sp|P62847|RS24_HUMAN@122		sp|P09874|PARP1_HUMAN@949		sp|Q5T1Q4|S35F1_HUMAN@368
sp|P01023|A2MG_HUMAN@115		sp|Q16822|PCKGM_HUMAN@489		sp|Q92925|SMRD2_HUMAN@244
sp|Q8IVW6|ARI3B_HUMAN@388		sp|P25705|ATPA_HUMAN@539		sp|Q2M1K9|ZN423_HUMAN@1076
sp|O60610|DIAP1_HUMAN@35		sp|O95202|LETM1_HUMAN@122		sp|Q9H0A0|NAT10_HUMAN@989
sp|P49207|RL34_HUMAN@19		sp|Q9NVI1|FANCI_HUMAN@849		sp|P30154|2AAB_HUMAN@319
sp|Q8IUD2|RB6I2_HUMAN@894		sp|P00918|CAH2_HUMAN@153		sp|O00567|NOP56_HUMAN@540
sp|Q9Y2Q3|GSTK1_HUMAN@163		sp|P23526|SAHH_HUMAN@389		sp|Q14980|NUMA1_HUMAN@326
sp|Q00610|CLH1_HUMAN@367		sp|Q9BZZ5|API5_HUMAN@448		sp|P11310|ACADM_HUMAN@301
sp|Q14562|DHX8_HUMAN@315		sp|Q13547|HDAC1_HUMAN@89		sp|Q5BJD5|TM41B_HUMAN@185
sp|Q9P2E9|RRBP1_HUMAN@720		sp|P14618|KPYM_HUMAN@125		sp|P35613|BASI_HUMAN@187
sp|P35268|RL22_HUMAN@10		sp|Q9UKM9|RALY_HUMAN@102		REV_sp|Q8TBY9|CF251_HUMAN@1079
sp|Q9NXU5|ARL15_HUMAN@156		sp|Q99536|VAT1_HUMAN@225		REV_sp|Q9H6N6|MYH16_HUMAN@435
sp|Q12996|CSTF3_HUMAN@392		sp|Q5VTE0|EF1A3_HUMAN@180		REV_sp|Q6ZTR5|CFA47_HUMAN@1216
sp|Q9NVH1|DJC11_HUMAN@31		sp|P05023|AT1A1_HUMAN@444		sp|O75367|H2AY_HUMAN@161
sp|P46776|RL27A_HUMAN@119		sp|Q9UNF1|MAGD2_HUMAN@494		sp|O60563|CCNT1_HUMAN@395
sp|P48444|COPD_HUMAN@241		sp|Q15311|RBP1_HUMAN@421		sp|Q3MHD2|LSM12_HUMAN@168
sp|P35659|DEK_HUMAN@272		sp|Q5THJ4|VP13D_HUMAN@3643		sp|C9J202|AG1L2_HUMAN@14
sp|Q16352|AINX_HUMAN@290		sp|P06748|NPM_HUMAN@150		sp|P45973|CBX5_HUMAN@32
sp|P78347|GTF2I_HUMAN@734		sp|Q92900|RENT1_HUMAN@929		sp|Q7Z442|PK1L2_HUMAN@1668
sp|P11586|C1TC_HUMAN@21		sp|P16949|STMN1_HUMAN@104		sp|P55072|TERA_HUMAN@217
sp|P29401|TKT_HUMAN@310		sp|Q9Y237|PIN4_HUMAN@32		sp|Q9UQ35|SRRM2_HUMAN@1605
sp|P61803|DAD1_HUMAN@82		sp|P36578|RL4_HUMAN@239		sp|P61009|SPCS3_HUMAN@121
sp|Q02224|CENPE_HUMAN@1083		sp|P11586|C1TC_HUMAN@297		sp|Q13952|NFYC_HUMAN@36
sp|Q53GQ0|DHB12_HUMAN@249		sp|Q12789|TF3C1_HUMAN@337		sp|Q9Y6E0|STK24_HUMAN@60
sp|Q6UN15|FIP1_HUMAN@246		sp|A5YKK6|CNOT1_HUMAN@556		sp|P25440|BRD2_HUMAN@544
sp|Q14444|CAPR1_HUMAN@63		sp|P58876|H2B1D_HUMAN@6		sp|P36871|PGM1_HUMAN@349
sp|Q70UQ0|IKIP_HUMAN@243		sp|Q92616|GCN1_HUMAN@17		sp|P55072|TERA_HUMAN@18
sp|P62979|RS27A_HUMAN@11		sp|Q6PJT7|ZC3HE_HUMAN@337		sp|P38432|COIL_HUMAN@459
sp|P39023|RL3_HUMAN@300		sp|P10768|ESTD_HUMAN@200		sp|Q9H6U8|ALG9_HUMAN@11
sp|P16104|H2AX_HUMAN@128		sp|P36542|ATPG_HUMAN@43		sp|P45974|UBP5_HUMAN@357
sp|P13639|EF2_HUMAN@407		sp|Q9P0L0|VAPA_HUMAN@211		sp|Q9C0J8|WDR33_HUMAN@264
sp|P25705|ATPA_HUMAN@132		sp|Q00341|VIGLN_HUMAN@632		sp|Q96C19|EFHD2_HUMAN@188
sp|P08758|ANXA5_HUMAN@76		sp|P43897|EFTS_HUMAN@84		sp|Q92747|ARC1A_HUMAN@179
sp|O43719|HTSF1_HUMAN@104		sp|P09661|RU2A_HUMAN@179		sp|P18621|RL17_HUMAN@37
sp|Q15365|PCBP1_HUMAN@314		sp|Q15233|NONO_HUMAN@336		sp|P49756|RBM25_HUMAN@155
sp|Q15286|RAB35_HUMAN@189		sp|P14868|SYDC_HUMAN@451		sp|Q29RF7|PDS5A_HUMAN@601
sp|Q9NTK5|OLA1_HUMAN@394		sp|P34931|HS71L_HUMAN@27		sp|P00558|PGK1_HUMAN@275
sp|P62913|RL11_HUMAN@159		sp|Q15631|TSN_HUMAN@56		sp|Q2M1K9|ZN423_HUMAN@154
sp|P62993|GRB2_HUMAN@69		sp|Q9Y3C6|PPIL1_HUMAN@158		sp|Q13428|TCOF_HUMAN@1078
sp|Q9UMS4|PRP19_HUMAN@192		sp|P41240|CSK_HUMAN@393		sp|Q9H892|TTC12_HUMAN@565
sp|P46940|IQGA1_HUMAN@1464		sp|O60841|IF2P_HUMAN@226		sp|Q9BSC4|NOL10_HUMAN@130
sp|Q13435|SF3B2_HUMAN@400		sp|P46778|RL21_HUMAN@115		sp|P29966|MARCS_HUMAN@87
sp|O75369|FLNB_HUMAN@349		sp|P22234|PUR6_HUMAN@235		sp|P10599|THIO_HUMAN@96
sp|Q16658|FSCN1_HUMAN@399		sp|Q14152|EIF3A_HUMAN@651		sp|P52948|NUP98_HUMAN@534
sp|Q13442|HAP28_HUMAN@137		sp|P39023|RL3_HUMAN@286		sp|Q01813|PFKAP_HUMAN@156
sp|P27708|PYR1_HUMAN@1869		sp|O95347|SMC2_HUMAN@837		sp|P78347|GTF2I_HUMAN@372
sp|Q969E8|TSR2_HUMAN@128		sp|P43243|MATR3_HUMAN@716		sp|P13639|EF2_HUMAN@445
sp|P07305|H10_HUMAN@82		sp|P29966|MARCS_HUMAN@105		sp|Q9Y4W6|AFG32_HUMAN@342
sp|Q9NTJ3|SMC4_HUMAN@434		sp|Q96EY1|DNJA3_HUMAN@324		sp|Q9Y3T9|NOC2L_HUMAN@77
sp|P07814|SYEP_HUMAN@173		sp|Q53GQ0|DHB12_HUMAN@95		sp|P46940|IQGA1_HUMAN@1230
sp|Q15555|MARE2_HUMAN@235		sp|Q14697|GANAB_HUMAN@908		sp|P19525|E2AK2_HUMAN@304
sp|P06733|ENOA_HUMAN@233		sp|Q9Y2W1|TR150_HUMAN@481		sp|Q13813|SPTN1_HUMAN@1093
sp|P26599|PTBP1_HUMAN@266		sp|Q15061|WDR43_HUMAN@491		sp|B5ME19|EIFCL_HUMAN@775
sp|P46063|RECQ1_HUMAN@626		sp|P62753|RS6_HUMAN@30		sp|Q14204|DYHC1_HUMAN@2094
sp|O75909|CCNK_HUMAN@354		sp|P39748|FEN1_HUMAN@201		sp|Q9H583|HEAT1_HUMAN@735
sp|O00571|DDX3X_HUMAN@64		sp|Q9HC07|TM165_HUMAN@227		sp|O14936|CSKP_HUMAN@877
sp|Q9Y2W1|TR150_HUMAN@221		sp|P42285|MTREX_HUMAN@646		sp|Q8TEM1|PO210_HUMAN@201
sp|P49720|PSB3_HUMAN@77		sp|Q8N3U4|STAG2_HUMAN@53		sp|Q86YB8|ERO1B_HUMAN@430
sp|Q92841|DDX17_HUMAN@547		sp|Q8NI27|THOC2_HUMAN@415		sp|P05455|LA_HUMAN@105
sp|P59998|ARPC4_HUMAN@44		sp|Q00839|HNRPU_HUMAN@343		sp|P27694|RFA1_HUMAN@410
sp|P11940|PABP1_HUMAN@625		sp|P07900|HS90A_HUMAN@209		sp|Q13564|ULA1_HUMAN@352
sp|Q99497|PARK7_HUMAN@188		REV_sp|Q5GLZ8|HERC4_HUMAN@565		sp|P09429|HMGB1_HUMAN@7
sp|P62857|RS28_HUMAN@16		sp|P46087|NOP2_HUMAN@772		sp|Q86UP2|KTN1_HUMAN@806
sp|P27695|APEX1_HUMAN@52		sp|Q9NTJ3|SMC4_HUMAN@524		sp|Q92878|RAD50_HUMAN@256
sp|P05091|ALDH2_HUMAN@355		sp|Q9ENL0|VP6_CTFVL@188		sp|Q13576|IQGA2_HUMAN@1454
sp|Q9Y3C8|UFC1_HUMAN@17		sp|P51665|PSMD7_HUMAN@28		sp|Q16658|FSCN1_HUMAN@41
sp|P34932|HSP74_HUMAN@194		sp|O14776|TCRG1_HUMAN@700		sp|Q14517|FAT1_HUMAN@1503
sp|Q9BWD1|THIC_HUMAN@180		sp|Q8WUA2|PPIL4_HUMAN@352		sp|O95347|SMC2_HUMAN@183
sp|Q02878|RL6_HUMAN@260		sp|Q14203|DCTN1_HUMAN@558		sp|Q14739|LBR_HUMAN@186
sp|Q14789|GOGB1_HUMAN@2880		sp|O60841|IF2P_HUMAN@224		sp|Q9H920|RN121_HUMAN@125
sp|P02786|TFR1_HUMAN@58		sp|Q8IWS0|PHF6_HUMAN@273		sp|Q96EY8|MMAB_HUMAN@61
sp|P12081|HARS1_HUMAN@443		sp|Q99714|HCD2_HUMAN@104		sp|Q86V81|THOC4_HUMAN@86
sp|Q07666|KHDR1_HUMAN@185		sp|P19338|NUCL_HUMAN@398		sp|Q9H307|PININ_HUMAN@665
sp|Q01085|TIAR_HUMAN@90		sp|P46778|RL21_HUMAN@21		sp|Q99536|VAT1_HUMAN@63
sp|Q13200|PSMD2_HUMAN@551		sp|Q15070|OXA1L_HUMAN@343		sp|P54886|P5CS_HUMAN@300
sp|P19338|NUCL_HUMAN@324		sp|P07305|H10_HUMAN@121		sp|Q9Y4R8|TELO2_HUMAN@291
sp|P28370|SMCA1_HUMAN@71		sp|O15347|HMGB3_HUMAN@88		sp|P38919|IF4A3_HUMAN@314
sp|P07814|SYEP_HUMAN@720		sp|Q9Y5J1|UTP18_HUMAN@41		sp|Q9BQE3|TBA1C_HUMAN@164
sp|P78371|TCPB_HUMAN@230		sp|P49750|YLPM1_HUMAN@2138		REV_sp|Q8N7P1|PLD5_HUMAN@241
sp|O00567|NOP56_HUMAN@578		sp|Q02878|RL6_HUMAN@77		sp|O43663|PRC1_HUMAN@273
sp|Q13310|PABP4_HUMAN@78		sp|P62753|RS6_HUMAN@164		sp|Q8NBT2|SPC24_HUMAN@50
sp|Q9H299|SH3L3_HUMAN@18		REV_sp|Q8IVF1|NTM2A_HUMAN@17		sp|P40939|ECHA_HUMAN@214
sp|Q93077|H2A1C_HUMAN@120		sp|P30050|RL12_HUMAN@41		sp|Q14247|SRC8_HUMAN@304
sp|Q00341|VIGLN_HUMAN@494		sp|Q14865|ARI5B_HUMAN@162		sp|Q13435|SF3B2_HUMAN@570
sp|O14949|QCR8_HUMAN@73		sp|P35249|RFC4_HUMAN@205		sp|P51398|RT29_HUMAN@218
sp|O75947|ATP5H_HUMAN@73		sp|Q9NYF8|BCLF1_HUMAN@332		sp|Q06587|RING1_HUMAN@285
sp|Q9Y287|ITM2B_HUMAN@13		sp|Q14257|RCN2_HUMAN@71		sp|O94913|PCF11_HUMAN@1278
sp|Q9P0L0|VAPA_HUMAN@154		sp|Q9BZZ5|API5_HUMAN@411		sp|Q9P2J5|SYLC_HUMAN@270
sp|P46087|NOP2_HUMAN@79		sp|Q13123|RED_HUMAN@137		sp|P08579|RU2B_HUMAN@93
sp|Q96I25|SPF45_HUMAN@46		sp|P62750|RL23A_HUMAN@134		sp|Q9Y617|SERC_HUMAN@323
sp|P31946|1433B_HUMAN@70		sp|P02786|TFR1_HUMAN@665		sp|P08195|4F2_HUMAN@257
sp|P21796|VDAC1_HUMAN@61		REV_sp|Q8N3K9|CMYA5_HUMAN@207		sp|Q9UN86|G3BP2_HUMAN@370
sp|Q9UQE7|SMC3_HUMAN@889		sp|Q9H0C8|ILKAP_HUMAN@20		sp|O43670|ZN207_HUMAN@100
sp|P20042|IF2B_HUMAN@293		sp|P15529|MCP_HUMAN@375		sp|P62820|RAB1A_HUMAN@187
sp|Q13428|TCOF_HUMAN@1273		sp|Q02539|H11_HUMAN@66		sp|O95347|SMC2_HUMAN@890
sp|Q96RV3|PCX1_HUMAN@1940		sp|O60674|JAK2_HUMAN@269		sp|Q96PU8|QKI_HUMAN@190
sp|Q9Y6D9|MD1L1_HUMAN@351		sp|P29401|TKT_HUMAN@260		sp|Q9Y5B9|SP16H_HUMAN@1021
sp|Q6YN16|HSDL2_HUMAN@284		sp|P21333|FLNA_HUMAN@2024		sp|P45880|VDAC2_HUMAN@43
sp|Q9H1E3|NUCKS_HUMAN@196		sp|P41091|IF2G_HUMAN@196		sp|P08559|ODPA_HUMAN@321
sp|O60869|EDF1_HUMAN@15		sp|P31948|STIP1_HUMAN@388		sp|Q03252|LMNB2_HUMAN@255
sp|P53618|COPB_HUMAN@651		sp|P51531|SMCA2_HUMAN@521		sp|P61009|SPCS3_HUMAN@137
sp|P47985|UCRI_HUMAN@182		sp|P51659|DHB4_HUMAN@68		sp|Q14409|GLPK3_HUMAN@6
sp|P16403|H12_HUMAN@119		sp|P60520|GBRL2_HUMAN@46		sp|P49327|FAS_HUMAN@235
sp|P14735|IDE_HUMAN@929		sp|P49591|SYSC_HUMAN@12		sp|Q8WUM4|PDC6I_HUMAN@334
sp|Q6IPU0|CENPP_HUMAN@241		sp|P52294|IMA5_HUMAN@105		sp|O75152|ZC11A_HUMAN@199
sp|Q9Y5B9|SP16H_HUMAN@184		sp|Q9UG63|ABCF2_HUMAN@608		sp|Q5JRX3|PREP_HUMAN@490
sp|P82979|SARNP_HUMAN@88		sp|Q9ULV4|COR1C_HUMAN@407		sp|Q9HCC0|MCCB_HUMAN@382
sp|Q14126|DSG2_HUMAN@697		sp|P26599|PTBP1_HUMAN@259		sp|Q8WXH0|SYNE2_HUMAN@1456
sp|Q9H583|HEAT1_HUMAN@1811		sp|Q7Z4W1|DCXR_HUMAN@17		sp|Q92616|GCN1_HUMAN@1208
sp|Q8N8S7|ENAH_HUMAN@461		sp|O43615|TIM44_HUMAN@312		sp|O95758|PTBP3_HUMAN@92
sp|P78527|PRKDC_HUMAN@2746		sp|Q01167|FOXK2_HUMAN@318		sp|O76094|SRP72_HUMAN@283
sp|P40939|ECHA_HUMAN@129		sp|P48643|TCPE_HUMAN@223		sp|P83731|RL24_HUMAN@61
sp|P52815|RM12_HUMAN@183		sp|P54577|SYYC_HUMAN@334		sp|Q9UKY7|CDV3_HUMAN@76
sp|Q96T37|RBM15_HUMAN@740		sp|P38117|ETFB_HUMAN@11		sp|Q07020|RL18_HUMAN@78
sp|Q7KZF4|SND1_HUMAN@869		sp|Q9H0X9|OSBL5_HUMAN@446		sp|P51991|ROA3_HUMAN@134
sp|Q9BY67|CADM1_HUMAN@187		sp|Q96AC1|FERM2_HUMAN@390		sp|Q2M3C7|SPKAP_HUMAN@617
sp|Q9BQA1|MEP50_HUMAN@3		sp|P83731|RL24_HUMAN@147		sp|P61247|RS3A_HUMAN@222
sp|P07814|SYEP_HUMAN@977		sp|Q8IY67|RAVR1_HUMAN@434		sp|Q9UIG0|BAZ1B_HUMAN@1037
sp|Q14247|SRC8_HUMAN@272		sp|P08621|RU17_HUMAN@130		sp|P49915|GUAA_HUMAN@120
REV_sp|P11137|MTAP2_HUMAN@99		sp|P16615|AT2A2_HUMAN@683		sp|P08243|ASNS_HUMAN@478
sp|Q13112|CAF1B_HUMAN@457		sp|Q12906|ILF3_HUMAN@342		sp|Q68CZ6|HAUS3_HUMAN@554
sp|P61247|RS3A_HUMAN@46		sp|Q9Y237|PIN4_HUMAN@75		sp|P52597|HNRPF_HUMAN@98
sp|P55265|DSRAD_HUMAN@798		sp|Q14152|EIF3A_HUMAN@916		sp|O60701|UGDH_HUMAN@490
sp|P13639|EF2_HUMAN@258		sp|O14776|TCRG1_HUMAN@1024		sp|Q8NC51|SERB1_HUMAN@299
sp|P41252|SYIC_HUMAN@1051		sp|P62906|RL10A_HUMAN@152		sp|Q14839|CHD4_HUMAN@295
sp|P61163|ACTZ_HUMAN@324		sp|P49411|EFTU_HUMAN@421		sp|Q92685|ALG3_HUMAN@22
sp|Q14258|TRI25_HUMAN@237		sp|P60842|IF4A1_HUMAN@369		sp|O15355|PPM1G_HUMAN@339
sp|O75369|FLNB_HUMAN@272		sp|Q9BT78|CSN4_HUMAN@137		sp|Q13616|CUL1_HUMAN@410
sp|P55884|EIF3B_HUMAN@729		sp|O43290|SNUT1_HUMAN@530		sp|P53675|CLH2_HUMAN@506
sp|O43776|SYNC_HUMAN@104		sp|Q9NQR4|NIT2_HUMAN@68		sp|Q9UGN5|PARP2_HUMAN@276
sp|P23381|SYWC_HUMAN@114		sp|Q99798|ACON_HUMAN@520		sp|Q9UBU9|NXF1_HUMAN@347
sp|P42858|HD_HUMAN@1402		sp|Q92499|DDX1_HUMAN@82		sp|P35580|MYH10_HUMAN@982
sp|P16402|H13_HUMAN@120		sp|P11388|TOP2A_HUMAN@1159		sp|Q99615|DNJC7_HUMAN@41
sp|Q29RF7|PDS5A_HUMAN@1211		sp|Q07065|CKAP4_HUMAN@405		sp|P41252|SYIC_HUMAN@132
sp|P08670|VIME_HUMAN@104		sp|Q16629|SRSF7_HUMAN@24		sp|Q8WTT2|NOC3L_HUMAN@410
sp|Q9UHD8|SEPT9_HUMAN@99		sp|Q92733|PRCC_HUMAN@193		sp|O60841|IF2P_HUMAN@628
sp|O95456|PSMG1_HUMAN@264		sp|Q9UKV3|ACINU_HUMAN@970		sp|P22234|PUR6_HUMAN@19
sp|P20700|LMNB1_HUMAN@271		sp|Q96IK1|BOD1_HUMAN@161		sp|Q9UPY3|DICER_HUMAN@1595
sp|Q00169|PIPNA_HUMAN@50		sp|Q9H3K2|GHITM_HUMAN@76		sp|Q9P2J5|SYLC_HUMAN@983
sp|P46013|KI67_HUMAN@2309		sp|P08195|4F2_HUMAN@147		sp|Q01518|CAP1_HUMAN@173
sp|P63162|RSMN_HUMAN@5		sp|Q01082|SPTB2_HUMAN@1913		sp|P04075|ALDOA_HUMAN@322
sp|Q13618|CUL3_HUMAN@444		sp|Q9Y679|AUP1_HUMAN@250		sp|Q8NDV3|SMC1B_HUMAN@529
sp|P16402|H13_HUMAN@149		sp|O95202|LETM1_HUMAN@133		sp|Q9Y673|ALG5_HUMAN@202
sp|Q13616|CUL1_HUMAN@337		sp|Q8WVM8|SCFD1_HUMAN@572		sp|Q7L014|DDX46_HUMAN@186
sp|P78527|PRKDC_HUMAN@2715		sp|Q9UBE0|SAE1_HUMAN@208		sp|Q6IMI6|ST1C3_HUMAN@206
sp|P21912|SDHB_HUMAN@123		sp|P35579|MYH9_HUMAN@1802		sp|O75717|WDHD1_HUMAN@811
sp|Q99877|H2B1N_HUMAN@35		sp|P29966|MARCS_HUMAN@30		sp|Q00059|TFAM_HUMAN@76
sp|O75439|MPPB_HUMAN@219		sp|Q13428|TCOF_HUMAN@253		sp|P53396|ACLY_HUMAN@962
sp|Q4VCS5|AMOT_HUMAN@585		sp|Q9Y490|TLN1_HUMAN@922		sp|Q9NZ45|CISD1_HUMAN@55
sp|O76031|CLPX_HUMAN@148		sp|P35241|RADI_HUMAN@526		sp|Q14152|EIF3A_HUMAN@775
sp|Q86UP2|KTN1_HUMAN@162		sp|P09874|PARP1_HUMAN@346		sp|Q08379|GOGA2_HUMAN@546
sp|Q9NZI8|IF2B1_HUMAN@190		sp|Q9NVA2|SEP11_HUMAN@190		sp|Q8NCM8|DYHC2_HUMAN@398
sp|P06733|ENOA_HUMAN@81		sp|O15212|PFD6_HUMAN@88		sp|P18803|REV_HV1ND@14
sp|P20537|PG042_VACCC@72		REV_sp|Q07954|LRP1_HUMAN@3947		sp|O95831|AIFM1_HUMAN@362
sp|Q9UHV9|PFD2_HUMAN@94		sp|Q4VCS5|AMOT_HUMAN@464		sp|P38606|VATA_HUMAN@506
sp|P41252|SYIC_HUMAN@375		sp|P23284|PPIB_HUMAN@41		sp|P51572|BAP31_HUMAN@34
sp|P15927|RFA2_HUMAN@231		sp|P46783|RS10_HUMAN@53		sp|Q9UMS4|PRP19_HUMAN@64
sp|P20700|LMNB1_HUMAN@145		sp|Q9H0U4|RAB1B_HUMAN@55		sp|P13667|PDIA4_HUMAN@145
sp|Q9UJZ1|STML2_HUMAN@250		sp|P46781|RS9_HUMAN@52		sp|Q5THJ4|VP13D_HUMAN@2795
sp|P53618|COPB_HUMAN@712		sp|Q02952|AKA12_HUMAN@297		sp|P61604|CH10_HUMAN@36
sp|P49321|NASP_HUMAN@417		sp|P56134|ATPK_HUMAN@59		sp|P35250|RFC2_HUMAN@127
sp|P26038|MOES_HUMAN@64		sp|Q15149|PLEC_HUMAN@597		sp|Q15388|TOM20_HUMAN@56
sp|Q12888|TP53B_HUMAN@1626		sp|P50990|TCPQ_HUMAN@466		sp|Q06124|PTN11_HUMAN@280
sp|P47756|CAPZB_HUMAN@95		sp|P09601|HMOX1_HUMAN@243		sp|P14350|POL_FOAMV@543
sp|Q9HC35|EMAL4_HUMAN@493		sp|P56182|RRP1_HUMAN@263		sp|O60271|JIP4_HUMAN@667
sp|Q09161|NCBP1_HUMAN@698		sp|P46060|RAGP1_HUMAN@172		sp|P22307|SCP2_HUMAN@126
sp|O94826|TOM70_HUMAN@78		sp|P18206|VINC_HUMAN@639		sp|Q92905|CSN5_HUMAN@194
sp|P61221|ABCE1_HUMAN@121		sp|P23786|CPT2_HUMAN@544		sp|O75691|UTP20_HUMAN@2631
sp|P62805|H4_HUMAN@80		sp|O60763|USO1_HUMAN@821		sp|Q8N3F8|MILK1_HUMAN@357
sp|P11388|TOP2A_HUMAN@1459		sp|Q00765|REEP5_HUMAN@172		sp|Q9UBU9|NXF1_HUMAN@607
sp|P09622|DLDH_HUMAN@166		sp|Q14498|RBM39_HUMAN@232		sp|P12270|TPR_HUMAN@59
sp|O75691|UTP20_HUMAN@1027		REV_sp|Q8WZ42|TITIN_HUMAN@690		sp|Q00839|HNRPU_HUMAN@543
sp|Q06323|PSME1_HUMAN@70		sp|P31689|DNJA1_HUMAN@23		sp|Q13148|TADBP_HUMAN@102
sp|Q15181|IPYR_HUMAN@176		sp|Q96QC0|PP1RA_HUMAN@224		sp|Q99729|ROAA_HUMAN@142
sp|P50213|IDH3A_HUMAN@343		sp|O60832|DKC1_HUMAN@443		sp|Q5BJF2|SGMR2_HUMAN@130
sp|Q15020|SART3_HUMAN@684		sp|P35659|DEK_HUMAN@284		REV_sp|P37800|L_TOSV@1216
sp|Q9NSD9|SYFB_HUMAN@47		sp|Q8WVX9|FACR1_HUMAN@161		sp|P30533|AMRP_HUMAN@323
sp|P49792|RBP2_HUMAN@1711		sp|Q9UMS4|PRP19_HUMAN@122		sp|O75792|RNH2A_HUMAN@64
sp|Q9Y490|TLN1_HUMAN@2031		sp|P53007|TXTP_HUMAN@149		sp|Q5JU69|TOR2A_HUMAN@72
sp|P62081|RS7_HUMAN@178		sp|Q5T6V5|QNG1_HUMAN@38		sp|Q96DZ1|ERLEC_HUMAN@433
sp|P02545|LMNA_HUMAN@32		sp|P50990|TCPQ_HUMAN@459		REV_sp|P0DTD1|R1AB_SARS2@6360
sp|P07237|PDIA1_HUMAN@283		sp|Q01813|PFKAP_HUMAN@688		sp|Q9BV73|CP250_HUMAN@1412
sp|P21333|FLNA_HUMAN@1491		sp|Q02818|NUCB1_HUMAN@99		sp|P13010|XRCC5_HUMAN@469
sp|Q04637|IF4G1_HUMAN@1074		sp|P61978|HNRPK_HUMAN@198		sp|O76021|RL1D1_HUMAN@337
sp|Q15084|PDIA6_HUMAN@326		sp|Q9P258|RCC2_HUMAN@124		sp|P40926|MDHM_HUMAN@296
sp|P51572|BAP31_HUMAN@199		REV_sp|P28290|ITPI2_HUMAN@1043		sp|P54886|P5CS_HUMAN@59
sp|P35637|FUS_HUMAN@316		sp|Q9Y266|NUDC_HUMAN@196		sp|P05556|ITB1_HUMAN@238
sp|Q9NYF8|BCLF1_HUMAN@303		REV_sp|P13872|RDRP_INBAD@551		sp|P35232|PHB1_HUMAN@208
sp|O60729|CC14B_HUMAN@377		sp|O00330|ODPX_HUMAN@394		sp|P11021|BIP_HUMAN@376
sp|P16403|H12_HUMAN@168		sp|P33991|MCM4_HUMAN@770		sp|P53396|ACLY_HUMAN@991
sp|Q14247|SRC8_HUMAN@346		sp|P09874|PARP1_HUMAN@196		sp|O43765|SGTA_HUMAN@200
sp|Q08J23|NSUN2_HUMAN@650		sp|Q12905|ILF2_HUMAN@45		sp|P12956|XRCC6_HUMAN@189
sp|Q92945|FUBP2_HUMAN@122		sp|Q5VTE0|EF1A3_HUMAN@172		sp|Q53EL6|PDCD4_HUMAN@245
sp|Q5JPE7|NOMO2_HUMAN@438		sp|Q6P1R4|DUS1L_HUMAN@309		sp|Q92922|SMRC1_HUMAN@608
sp|P18124|RL7_HUMAN@29		sp|P25788|PSA3_HUMAN@230		sp|P63010|AP2B1_HUMAN@318
sp|Q92552|RT27_HUMAN@265		sp|Q0VG73|YC023_HUMAN@25		sp|O96019|ACL6A_HUMAN@379
sp|P07900|HS90A_HUMAN@58		sp|Q9H993|ARMT1_HUMAN@40		sp|P14314|GLU2B_HUMAN@438
sp|P30084|ECHM_HUMAN@288		sp|Q9H223|EHD4_HUMAN@471		sp|P14618|KPYM_HUMAN@498
sp|P53621|COPA_HUMAN@1082		sp|P83731|RL24_HUMAN@27		sp|Q96AG4|LRC59_HUMAN@73
sp|Q15031|SYLM_HUMAN@720		sp|Q13439|GOGA4_HUMAN@1077		sp|O00487|PSDE_HUMAN@277
sp|P50570|DYN2_HUMAN@562		sp|P36578|RL4_HUMAN@29		sp|Q5UIP0|RIF1_HUMAN@1069
sp|Q9BTW9|TBCD_HUMAN@299		sp|O15371|EIF3D_HUMAN@53		sp|Q9P2E9|RRBP1_HUMAN@841
sp|Q8N1F7|NUP93_HUMAN@718		sp|Q9BQG0|MBB1A_HUMAN@344		sp|Q8WU79|SMAP2_HUMAN@152
sp|P49419|AL7A1_HUMAN@232		sp|Q5T9A4|ATD3B_HUMAN@214		sp|Q9HC07|TM165_HUMAN@208
sp|P38646|GRP75_HUMAN@563		sp|Q8WU90|ZC3HF_HUMAN@362		sp|P40222|TXLNA_HUMAN@455
sp|P18206|VINC_HUMAN@71		sp|P09874|PARP1_HUMAN@269		sp|Q9Y6G9|DC1L1_HUMAN@486
sp|P27816|MAP4_HUMAN@780		sp|P17066|HSP76_HUMAN@453		sp|Q8TEQ6|GEMI5_HUMAN@1436
sp|Q8NFD5|ARI1B_HUMAN@1212		sp|P49321|NASP_HUMAN@442		sp|P36639|8ODP_HUMAN@132
sp|P61106|RAB14_HUMAN@59		sp|Q9UG63|ABCF2_HUMAN@326		sp|Q9UBV8|PEF1_HUMAN@260
sp|P61011|SRP54_HUMAN@311		sp|P13073|COX41_HUMAN@87		sp|P53675|CLH2_HUMAN@450
sp|Q9Y678|COPG1_HUMAN@600		sp|P14618|KPYM_HUMAN@186		sp|P19338|NUCL_HUMAN@513
sp|P22059|OSBP1_HUMAN@544		sp|P23193|TCEA1_HUMAN@199		sp|Q9P258|RCC2_HUMAN@320
sp|Q13017|RHG05_HUMAN@1375		sp|Q9BTX1|NDC1_HUMAN@430		sp|Q13464|ROCK1_HUMAN@701
sp|Q9H7C9|AAMDC_HUMAN@55		sp|Q2TAY7|SMU1_HUMAN@337		sp|P67809|YBOX1_HUMAN@137
sp|P13639|EF2_HUMAN@283		sp|P52888|THOP1_HUMAN@216		sp|P52907|CAZA1_HUMAN@97
sp|Q92734|TFG_HUMAN@103		sp|P35659|DEK_HUMAN@291		sp|P51153|RAB13_HUMAN@153
sp|Q9BVC6|TM109_HUMAN@215		sp|Q08752|PPID_HUMAN@331		sp|Q15750|TAB1_HUMAN@227
sp|Q8WZ42|TITIN_HUMAN@21745		sp|O15347|HMGB3_HUMAN@174		sp|Q8WWM7|ATX2L_HUMAN@553
sp|Q15370|ELOB_HUMAN@46		sp|Q9BVK6|TMED9_HUMAN@180		sp|P08238|HS90B_HUMAN@624
sp|P53367|ARFP1_HUMAN@107		sp|Q9P0K7|RAI14_HUMAN@1595		sp|Q96I24|FUBP3_HUMAN@278
sp|P62826|RAN_HUMAN@28		sp|Q6IBS0|TWF2_HUMAN@194		sp|O15217|GSTA4_HUMAN@127
sp|O43399|TPD54_HUMAN@139		sp|Q8WU90|ZC3HF_HUMAN@13		sp|Q8IZQ5|SELH_HUMAN@20
sp|Q00839|HNRPU_HUMAN@682		sp|Q9NP72|RAB18_HUMAN@138		sp|Q68DA7|FMN1_HUMAN@1054
sp|P16615|AT2A2_HUMAN@533		sp|P10809|CH60_HUMAN@202		sp|O00299|CLIC1_HUMAN@131
sp|P60174|TPIS_HUMAN@142		sp|O43592|XPOT_HUMAN@668		sp|P33992|MCM5_HUMAN@700
sp|Q09666|AHNK_HUMAN@4474		sp|P46060|RAGP1_HUMAN@15		sp|P46940|IQGA1_HUMAN@88
sp|O75694|NU155_HUMAN@740		sp|O75475|PSIP1_HUMAN@100		sp|O15020|SPTN2_HUMAN@105
sp|P31689|DNJA1_HUMAN@66		sp|P41240|CSK_HUMAN@67		sp|P61978|HNRPK_HUMAN@219
sp|P09012|SNRPA_HUMAN@96		sp|P25705|ATPA_HUMAN@230		sp|O43491|E41L2_HUMAN@444
sp|P02545|LMNA_HUMAN@123		sp|Q14152|EIF3A_HUMAN@308		sp|Q9HAV7|GRPE1_HUMAN@186
sp|Q13442|HAP28_HUMAN@105		sp|Q9UHD8|SEPT9_HUMAN@186		sp|Q9Y5B9|SP16H_HUMAN@497
sp|P41252|SYIC_HUMAN@1042		sp|Q9Y3Z3|SAMH1_HUMAN@534		sp|P68036|UB2L3_HUMAN@96
sp|P34932|HSP74_HUMAN@832		sp|P15170|ERF3A_HUMAN@71		sp|P28288|ABCD3_HUMAN@286
sp|O14818|PSA7_HUMAN@218		sp|Q96AE4|FUBP1_HUMAN@64		sp|O43776|SYNC_HUMAN@38
sp|Q8TEA8|DTD1_HUMAN@165		sp|P61769|B2MG_HUMAN@111		sp|Q8WW12|PCNP_HUMAN@167
sp|Q07065|CKAP4_HUMAN@301		sp|Q8IZ81|ELMD2_HUMAN@87		sp|Q16543|CDC37_HUMAN@126
sp|P40939|ECHA_HUMAN@569		sp|P14625|ENPL_HUMAN@733		sp|Q03252|LMNB2_HUMAN@77
sp|Q86UE4|LYRIC_HUMAN@107		sp|O15519|CFLAR_HUMAN@69		sp|Q14683|SMC1A_HUMAN@910
sp|O76021|RL1D1_HUMAN@109		sp|Q9Y487|VPP2_HUMAN@136		sp|O94925|GLSK_HUMAN@130
sp|Q16891|MIC60_HUMAN@269		sp|Q9Y673|ALG5_HUMAN@139		sp|Q9H9B4|SFXN1_HUMAN@223
sp|Q5JTH9|RRP12_HUMAN@789		REV_sp|Q86YH2|Z280B_HUMAN@227		sp|Q16543|CDC37_HUMAN@69
sp|Q9Y265|RUVB1_HUMAN@281		sp|Q5VT06|CE350_HUMAN@7075		sp|O43707|ACTN4_HUMAN@66
sp|Q13813|SPTN1_HUMAN@1655		sp|Q07666|KHDR1_HUMAN@165		sp|Q99459|CDC5L_HUMAN@20
sp|P36957|ODO2_HUMAN@203		sp|Q96CS3|FAF2_HUMAN@367		sp|O60264|SMCA5_HUMAN@761
sp|P46013|KI67_HUMAN@2236		sp|P55060|XPO2_HUMAN@832		REV_sp|Q7Z7G8|VP13B_HUMAN@2687
sp|Q9Y3Y2|CHTOP_HUMAN@30		sp|P23588|IF4B_HUMAN@511		sp|P13797|PLST_HUMAN@91
sp|P62424|RL7A_HUMAN@48		sp|P61604|CH10_HUMAN@40		sp|P78527|PRKDC_HUMAN@225
sp|Q5VTE0|EF1A3_HUMAN@215		sp|P62937|PPIA_HUMAN@82		sp|Q8N5K1|CISD2_HUMAN@74
sp|Q7L014|DDX46_HUMAN@577		sp|P62851|RS25_HUMAN@25		sp|Q4VCS5|AMOT_HUMAN@481
sp|Q02952|AKA12_HUMAN@298		sp|Q14204|DYHC1_HUMAN@4406		sp|Q8NCF5|NF2IP_HUMAN@268
sp|Q02878|RL6_HUMAN@19		sp|P51571|SSRD_HUMAN@73		sp|O76021|RL1D1_HUMAN@356
sp|Q02224|CENPE_HUMAN@1070		sp|P22102|PUR2_HUMAN@404		sp|Q13347|EIF3I_HUMAN@208
sp|P07910|HNRPC_HUMAN@189		sp|P26038|MOES_HUMAN@3		sp|A0A8I5KQE6|RPSA2_HUMAN@166
sp|P34932|HSP74_HUMAN@686		sp|O00330|ODPX_HUMAN@172		sp|Q5TEC6|H37_HUMAN@15
sp|Q15041|AR6P1_HUMAN@96		sp|O60884|DNJA2_HUMAN@131		sp|P50914|RL14_HUMAN@132
sp|Q99661|KIF2C_HUMAN@99		sp|P00558|PGK1_HUMAN@131		sp|P52907|CAZA1_HUMAN@278
sp|P17844|DDX5_HUMAN@470		sp|P48047|ATPO_HUMAN@70		sp|O00567|NOP56_HUMAN@240
sp|O00487|PSDE_HUMAN@154		sp|P34932|HSP74_HUMAN@134		sp|Q8NHP6|MSPD2_HUMAN@293
sp|P20042|IF2B_HUMAN@79		sp|Q9H3P2|NELFA_HUMAN@371		sp|Q06830|PRDX1_HUMAN@109
sp|Q99729|ROAA_HUMAN@153		sp|Q06787|FMR1_HUMAN@302		sp|P53999|TCP4_HUMAN@35
sp|O95104|SCAF4_HUMAN@1091		sp|P12270|TPR_HUMAN@159		sp|Q15084|PDIA6_HUMAN@66
sp|P50990|TCPQ_HUMAN@539		sp|P02545|LMNA_HUMAN@181		sp|Q9Y3I0|RTCB_HUMAN@504
sp|P07900|HS90A_HUMAN@74		sp|P35611|ADDA_HUMAN@140		sp|P07437|TBB5_HUMAN@58
sp|Q9P0L0|VAPA_HUMAN@125		sp|P0C745|HBZ_HTL1C@107		sp|Q9BSF4|TIM29_HUMAN@24
sp|Q96EY8|MMAB_HUMAN@51		sp|Q14839|CHD4_HUMAN@884		sp|Q9UM54|MYO6_HUMAN@1076
sp|Q92804|RBP56_HUMAN@268		sp|P38117|ETFB_HUMAN@238		sp|Q92841|DDX17_HUMAN@313
sp|P62753|RS6_HUMAN@119		sp|P17612|KAPCA_HUMAN@24		sp|Q96C36|P5CR2_HUMAN@318
sp|Q8WX93|PALLD_HUMAN@1029		REV_sp|Q63HN8|RN213_HUMAN@1048		sp|P11388|TOP2A_HUMAN@1373
sp|Q13310|PABP4_HUMAN@157		sp|Q9Y230|RUVB2_HUMAN@157		sp|Q14683|SMC1A_HUMAN@734
sp|Q02543|RL18A_HUMAN@11		sp|P42126|ECI1_HUMAN@89		sp|Q9NQX3|GEPH_HUMAN@148
sp|Q14203|DCTN1_HUMAN@962		sp|Q8NI27|THOC2_HUMAN@1432		sp|Q13045|FLII_HUMAN@472
sp|P48047|ATPO_HUMAN@84		sp|P06753|TPM3_HUMAN@249		sp|Q9Y6G9|DC1L1_HUMAN@94
sp|P10412|H14_HUMAN@17		sp|P23284|PPIB_HUMAN@129		sp|P05455|LA_HUMAN@109
sp|Q14566|MCM6_HUMAN@205		sp|Q9UPN9|TRI33_HUMAN@953		sp|P18124|RL7_HUMAN@107
sp|P08238|HS90B_HUMAN@275		sp|P30405|PPIF_HUMAN@182		sp|P48444|COPD_HUMAN@347
sp|Q9BVC6|TM109_HUMAN@46		sp|Q9NX58|LYAR_HUMAN@320		sp|P62906|RL10A_HUMAN@56
REV_sp|Q8N960|CE120_HUMAN@573		sp|P61221|ABCE1_HUMAN@431		sp|P13639|EF2_HUMAN@333
sp|P47914|RL29_HUMAN@134		sp|P13797|PLST_HUMAN@447		sp|P61011|SRP54_HUMAN@92
sp|Q16891|MIC60_HUMAN@282		sp|Q05519|SRS11_HUMAN@211		sp|P48643|TCPE_HUMAN@265
sp|Q8NCM8|DYHC2_HUMAN@192		sp|P35610|SOAT1_HUMAN@45		sp|P10412|H14_HUMAN@21
sp|P78527|PRKDC_HUMAN@3884		sp|Q13428|TCOF_HUMAN@746		sp|O43237|DC1L2_HUMAN@8
sp|Q13151|ROA0_HUMAN@96		sp|Q12931|TRAP1_HUMAN@67		sp|P35251|RFC1_HUMAN@15
sp|Q15459|SF3A1_HUMAN@533		sp|Q03252|LMNB2_HUMAN@298		sp|P36776|LONM_HUMAN@401
sp|P25787|PSA2_HUMAN@171		sp|P09874|PARP1_HUMAN@600		sp|Q04637|IF4G1_HUMAN@602
sp|P63104|1433Z_HUMAN@75		sp|P35520|CBS_HUMAN@481		sp|Q02878|RL6_HUMAN@8
sp|Q8NCN4|RN169_HUMAN@558		sp|P04843|RPN1_HUMAN@553		sp|Q9UBB9|TFP11_HUMAN@261
sp|Q14690|RRP5_HUMAN@1855		sp|O15372|EIF3H_HUMAN@306		sp|Q13485|SMAD4_HUMAN@507
sp|P37837|TALDO_HUMAN@286		sp|Q9UPN3|MACF1_HUMAN@859		sp|Q9Y5B9|SP16H_HUMAN@81
sp|O94906|PRP6_HUMAN@755		sp|Q7RTV0|PHF5A_HUMAN@95		sp|P10412|H14_HUMAN@160
sp|P27816|MAP4_HUMAN@387		sp|Q9BXJ9|NAA15_HUMAN@9		sp|O15031|PLXB2_HUMAN@1442
sp|Q13895|BYST_HUMAN@242		sp|P61978|HNRPK_HUMAN@60		sp|Q00796|DHSO_HUMAN@214
sp|Q5BJD5|TM41B_HUMAN@100		sp|P07237|PDIA1_HUMAN@114		sp|O00299|CLIC1_HUMAN@49
sp|Q13428|TCOF_HUMAN@444		sp|P27816|MAP4_HUMAN@1034		sp|P18206|VINC_HUMAN@1070
sp|Q6YN16|HSDL2_HUMAN@318		sp|P05114|HMGN1_HUMAN@53		sp|P50990|TCPQ_HUMAN@534
sp|P55145|MANF_HUMAN@133		sp|P49821|NDUV1_HUMAN@365		sp|P09543|CN37_HUMAN@204
sp|Q9BSD7|NTPCR_HUMAN@171		sp|Q8NCW5|NNRE_HUMAN@246		sp|O43660|PLRG1_HUMAN@363
sp|Q9H6F5|CCD86_HUMAN@225		sp|Q96HY7|DHTK1_HUMAN@188		sp|Q8IVF4|DYH10_HUMAN@3139
sp|P62906|RL10A_HUMAN@130		sp|P13995|MTDC_HUMAN@194		sp|Q9H7Z7|PGES2_HUMAN@269
sp|Q9NSE4|SYIM_HUMAN@194		sp|P52948|NUP98_HUMAN@797		sp|P52272|HNRPM_HUMAN@48
sp|Q6P2Q9|PRP8_HUMAN@1649		sp|P03243|E1B55_ADE05@101		sp|Q6UVJ0|SAS6_HUMAN@368
sp|P49915|GUAA_HUMAN@670		sp|Q53EZ4|CEP55_HUMAN@145		sp|O95163|ELP1_HUMAN@1055
sp|Q15651|HMGN3_HUMAN@33		sp|P45880|VDAC2_HUMAN@72		sp|P83876|TXN4A_HUMAN@134
sp|Q07955|SRSF1_HUMAN@179		sp|Q5UIP0|RIF1_HUMAN@1014		sp|O95573|ACSL3_HUMAN@679
sp|P16104|H2AX_HUMAN@135		sp|P51572|BAP31_HUMAN@192		sp|Q9HC35|EMAL4_HUMAN@112
sp|Q8NC51|SERB1_HUMAN@122		sp|P22626|ROA2_HUMAN@104		sp|Q92616|GCN1_HUMAN@308
sp|Q9Y490|TLN1_HUMAN@2043		sp|Q9Y2X3|NOP58_HUMAN@99		sp|P84098|RL19_HUMAN@190
sp|Q9Y3A5|SBDS_HUMAN@231		sp|Q9UMR2|DD19B_HUMAN@344		sp|O95470|SGPL1_HUMAN@129
sp|Q9H6R4|NOL6_HUMAN@47		sp|Q9P0M6|H2AW_HUMAN@116		sp|O00429|DNM1L_HUMAN@619
sp|P07741|APT_HUMAN@114		sp|Q14566|MCM6_HUMAN@313		sp|Q8NC51|SERB1_HUMAN@303
sp|Q99538|LGMN_HUMAN@125		sp|Q92947|GCDH_HUMAN@371		sp|P07197|NFM_HUMAN@598
sp|Q06830|PRDX1_HUMAN@16		sp|Q9H2G2|SLK_HUMAN@976		sp|Q9Y6M1|IF2B2_HUMAN@292
sp|Q562R1|ACTBL_HUMAN@329		sp|O60784|TOM1_HUMAN@106		sp|P20700|LMNB1_HUMAN@79
sp|Q29RF7|PDS5A_HUMAN@1267		sp|P11717|MPRI_HUMAN@2212		sp|P43243|MATR3_HUMAN@146
sp|P18621|RL17_HUMAN@159		sp|Q9UHB6|LIMA1_HUMAN@210		sp|Q86UP2|KTN1_HUMAN@142
sp|Q7Z3K3|POGZ_HUMAN@1053		sp|Q8N543|OGFD1_HUMAN@105		sp|Q12789|TF3C1_HUMAN@2000
sp|Q9P2S2|NRX2A_HUMAN@183		sp|O75152|ZC11A_HUMAN@665		sp|Q86Y56|DAAF5_HUMAN@445
sp|Q8N668|COMD1_HUMAN@82		sp|O75874|IDHC_HUMAN@66		sp|P23284|PPIB_HUMAN@98
sp|P06748|NPM_HUMAN@202		sp|P53992|SC24C_HUMAN@865		sp|P78527|PRKDC_HUMAN@1051
sp|P35579|MYH9_HUMAN@1274		sp|Q9Y371|SHLB1_HUMAN@168		sp|Q8WTT2|NOC3L_HUMAN@333
sp|Q8IY67|RAVR1_HUMAN@190		sp|Q9H9P8|L2HDH_HUMAN@173		sp|Q00610|CLH1_HUMAN@245
sp|P37802|TAGL2_HUMAN@153		sp|P06748|NPM_HUMAN@250		sp|Q9P0K7|RAI14_HUMAN@373
sp|Q14204|DYHC1_HUMAN@1829		sp|P46781|RS9_HUMAN@91		sp|P62140|PP1B_HUMAN@40
sp|P13667|PDIA4_HUMAN@521		sp|A0A8I5KQE6|RPSA2_HUMAN@52		sp|Q9Y5B9|SP16H_HUMAN@596
sp|Q9Y265|RUVB1_HUMAN@445		sp|Q5RI15|COX20_HUMAN@83		sp|P98175|RBM10_HUMAN@881
sp|Q7L014|DDX46_HUMAN@952		sp|P14927|QCR7_HUMAN@12		sp|P16403|H12_HUMAN@206
sp|Q8NC51|SERB1_HUMAN@68		sp|Q9BQE3|TBA1C_HUMAN@370		sp|P50454|SERPH_HUMAN@184
sp|P41252|SYIC_HUMAN@382		sp|P40938|RFC3_HUMAN@202		sp|P52701|MSH6_HUMAN@334
sp|Q9UJZ1|STML2_HUMAN@222		sp|Q14789|GOGB1_HUMAN@2022		sp|P13010|XRCC5_HUMAN@265
sp|P15880|RS2_HUMAN@58		sp|P13797|PLST_HUMAN@300		sp|Q15459|SF3A1_HUMAN@702
sp|O15228|GNPAT_HUMAN@643		sp|P30101|PDIA3_HUMAN@296		sp|P12270|TPR_HUMAN@364
sp|Q7L014|DDX46_HUMAN@776		sp|Q16851|UGPA_HUMAN@312		sp|Q9BTE7|DCNL5_HUMAN@124
sp|Q8WYP5|ELYS_HUMAN@1653		sp|Q99460|PSMD1_HUMAN@148		sp|Q96G03|PGM2_HUMAN@503
sp|Q9NPA8|ENY2_HUMAN@19		sp|Q7Z4V5|HDGR2_HUMAN@494		sp|Q96QU8|XPO6_HUMAN@891
sp|P27348|1433T_HUMAN@157		sp|Q14697|GANAB_HUMAN@220		REV_sp|Q9HCE1|MOV10_HUMAN@143
sp|P40227|TCPZ_HUMAN@10		sp|Q3LXA3|TKFC_HUMAN@487		sp|P07814|SYEP_HUMAN@800
sp|P07814|SYEP_HUMAN@1019		sp|P12081|HARS1_HUMAN@418		sp|Q15800|MSMO1_HUMAN@284
sp|Q9NR30|DDX21_HUMAN@73		sp|Q08945|SSRP1_HUMAN@540		sp|P13639|EF2_HUMAN@439
sp|Q9BRJ2|RM45_HUMAN@126		sp|Q2TAY7|SMU1_HUMAN@194		REV_sp|Q8WZ42|TITIN_HUMAN@10474
sp|P27348|1433T_HUMAN@9		sp|Q8IW35|CEP97_HUMAN@557		sp|Q8WTT2|NOC3L_HUMAN@68
sp|Q12792|TWF1_HUMAN@192		sp|P12236|ADT3_HUMAN@147		sp|Q9UNZ5|L10K_HUMAN@81
sp|Q9UQ35|SRRM2_HUMAN@980		sp|P40926|MDHM_HUMAN@324		sp|P00492|HPRT_HUMAN@175
sp|Q13907|IDI1_HUMAN@185		sp|P62937|PPIA_HUMAN@31		sp|Q9BXP5|SRRT_HUMAN@607
sp|Q13185|CBX3_HUMAN@21		sp|Q8WW12|PCNP_HUMAN@160		sp|Q15024|EXOS7_HUMAN@116
sp|P56182|RRP1_HUMAN@205		sp|Q13308|PTK7_HUMAN@636		sp|Q14684|RRP1B_HUMAN@204
sp|P62424|RL7A_HUMAN@26		sp|Q8WWM7|ATX2L_HUMAN@677		sp|Q5IFJ7|RL9_MACFA@184
sp|Q00341|VIGLN_HUMAN@197		sp|Q6P3W7|SCYL2_HUMAN@362		sp|Q15070|OXA1L_HUMAN@366
sp|P18206|VINC_HUMAN@1024		sp|Q15717|ELAV1_HUMAN@104		sp|Q9HA64|KT3K_HUMAN@275
sp|P60842|IF4A1_HUMAN@284		sp|Q9UJZ1|STML2_HUMAN@254		sp|Q8IVD9|NUDC3_HUMAN@177
sp|P11388|TOP2A_HUMAN@1068		sp|P07814|SYEP_HUMAN@300		sp|Q9C099|LRCC1_HUMAN@887
sp|Q12905|ILF2_HUMAN@360		sp|Q96PK6|RBM14_HUMAN@153		sp|Q15185|TEBP_HUMAN@33
sp|P07197|NFM_HUMAN@102		sp|P78417|GSTO1_HUMAN@143		sp|Q9Y5K6|CD2AP_HUMAN@359
sp|P61026|RAB10_HUMAN@56		sp|P12081|HARS1_HUMAN@42		sp|P15924|DESP_HUMAN@154
sp|P07197|NFM_HUMAN@679		sp|Q8WZ42|TITIN_HUMAN@18738		sp|Q9Y265|RUVB1_HUMAN@22
sp|Q9P2J5|SYLC_HUMAN@9		sp|Q562R1|ACTBL_HUMAN@62		sp|Q96FW1|OTUB1_HUMAN@120
sp|Q14677|EPN4_HUMAN@314		sp|P36871|PGM1_HUMAN@457		sp|Q9H2U2|IPYR2_HUMAN@216
sp|P27694|RFA1_HUMAN@163		REV_sp|P30929|L_MUMPM@844		sp|P62937|PPIA_HUMAN@133
sp|P62312|LSM6_HUMAN@5		sp|Q99661|KIF2C_HUMAN@276		sp|Q96ME7|ZN512_HUMAN@284
sp|O14979|HNRDL_HUMAN@204		sp|Q5T9A4|ATD3B_HUMAN@505		sp|Q9Y266|NUDC_HUMAN@315
sp|P13010|XRCC5_HUMAN@543		sp|O60493|SNX3_HUMAN@158		sp|Q15785|TOM34_HUMAN@259
sp|Q13310|PABP4_HUMAN@188		sp|P16949|STMN1_HUMAN@95		sp|Q8NC51|SERB1_HUMAN@310
sp|Q01105|SET_HUMAN@167		sp|P36507|MP2K2_HUMAN@196		sp|Q7KZF4|SND1_HUMAN@339
sp|P49588|SYAC_HUMAN@558		sp|P53621|COPA_HUMAN@1134		sp|Q9H1E3|NUCKS_HUMAN@219
sp|Q99590|SCAFB_HUMAN@1428		sp|P40222|TXLNA_HUMAN@311		sp|P31153|METK2_HUMAN@367
sp|Q8NHQ9|DDX55_HUMAN@47		sp|P15170|ERF3A_HUMAN@138		sp|Q04637|IF4G1_HUMAN@1234
sp|Q14978|NOLC1_HUMAN@401		sp|P35520|CBS_HUMAN@82		sp|P54802|ANAG_HUMAN@59
sp|Q6PI48|SYDM_HUMAN@224		sp|P18206|VINC_HUMAN@802		sp|O15357|SHIP2_HUMAN@383
sp|P52701|MSH6_HUMAN@1014		sp|Q9Y2L1|RRP44_HUMAN@627		sp|Q14444|CAPR1_HUMAN@74
sp|P49207|RL34_HUMAN@115		sp|P30533|AMRP_HUMAN@157		REV_sp|E9PAV3|NACAM_HUMAN@404
sp|Q9NWH9|SLTM_HUMAN@340		sp|Q9Y4B6|DCAF1_HUMAN@540		sp|Q9Y6G9|DC1L1_HUMAN@505
sp|Q13263|TIF1B_HUMAN@199		sp|P17987|TCPA_HUMAN@510		sp|O00461|GOLI4_HUMAN@187
sp|Q02818|NUCB1_HUMAN@81		sp|O95749|GGPPS_HUMAN@270		sp|Q9H0A0|NAT10_HUMAN@426
sp|Q15075|EEA1_HUMAN@294		sp|Q9BZZ5|API5_HUMAN@180		sp|P38117|ETFB_HUMAN@110
sp|P48444|COPD_HUMAN@164		sp|P67936|TPM4_HUMAN@13		sp|P46777|RL5_HUMAN@188
sp|O60832|DKC1_HUMAN@433		sp|P35268|RL22_HUMAN@69		sp|P46013|KI67_HUMAN@1756
sp|P08238|HS90B_HUMAN@607		sp|P55265|DSRAD_HUMAN@326		sp|O94906|PRP6_HUMAN@324
sp|Q6FI81|CPIN1_HUMAN@26		sp|Q15181|IPYR_HUMAN@199		sp|Q13439|GOGA4_HUMAN@1958
sp|P51572|BAP31_HUMAN@190		sp|P36507|MP2K2_HUMAN@88		sp|Q16851|UGPA_HUMAN@438
sp|P16403|H12_HUMAN@148		sp|Q96G03|PGM2_HUMAN@292		sp|Q00535|CDK5_HUMAN@213
sp|Q14204|DYHC1_HUMAN@1228		sp|P11320|E316_ADE03@14		sp|Q5VYK3|ECM29_HUMAN@321
sp|P37837|TALDO_HUMAN@277		sp|Q9NUQ9|CYRIB_HUMAN@317		sp|P0C6X6|R1AB_CVHOC@3052
sp|P54577|SYYC_HUMAN@474		sp|P28838|AMPL_HUMAN@221		sp|Q9BRJ2|RM45_HUMAN@102
sp|P09622|DLDH_HUMAN@159		sp|P08670|VIME_HUMAN@139		sp|B5ME19|EIFCL_HUMAN@628
sp|Q13428|TCOF_HUMAN@1263		sp|O14562|UBFD1_HUMAN@196		sp|Q2TAA2|IAH1_HUMAN@63
sp|P55884|EIF3B_HUMAN@552		sp|P27816|MAP4_HUMAN@832		sp|Q86XL3|ANKL2_HUMAN@73
sp|P49792|RBP2_HUMAN@542		sp|Q9BVK6|TMED9_HUMAN@160		sp|P78527|PRKDC_HUMAN@2970
sp|Q92878|RAD50_HUMAN@452		sp|O75521|ECI2_HUMAN@218		sp|Q68DA7|FMN1_HUMAN@1309
sp|P49368|TCPG_HUMAN@353		sp|Q8IY81|SPB1_HUMAN@218		sp|P11142|HSP7C_HUMAN@56
sp|O60869|EDF1_HUMAN@98		sp|P62258|1433E_HUMAN@125		sp|O75367|H2AY_HUMAN@116
sp|Q9NR30|DDX21_HUMAN@555		sp|P35269|T2FA_HUMAN@407		sp|Q8N183|NDUF2_HUMAN@130
sp|P42167|LAP2B_HUMAN@17		sp|P12270|TPR_HUMAN@1361		sp|P40855|PEX19_HUMAN@60
sp|Q9Y230|RUVB2_HUMAN@427		sp|Q9NZW5|PALS2_HUMAN@282		sp|Q9P258|RCC2_HUMAN@188
sp|P22102|PUR2_HUMAN@162		sp|P12270|TPR_HUMAN@1489		sp|Q7Z2W4|ZCCHV_HUMAN@314
sp|P42858|HD_HUMAN@153		sp|O95478|NSA2_HUMAN@201		sp|Q6UX04|CWC27_HUMAN@126
sp|P07311|ACYP1_HUMAN@25		sp|P05387|RLA2_HUMAN@25		sp|P61247|RS3A_HUMAN@195
sp|P62081|RS7_HUMAN@74		sp|Q9Y223|GLCNE_HUMAN@632		sp|Q9ULW0|TPX2_HUMAN@740
sp|Q15075|EEA1_HUMAN@696		sp|P30049|ATPD_HUMAN@165		sp|P18077|RL35A_HUMAN@29
sp|O43447|PPIH_HUMAN@164		sp|Q99584|S10AD_HUMAN@59		sp|Q14203|DCTN1_HUMAN@38
sp|O75369|FLNB_HUMAN@465		sp|P14618|KPYM_HUMAN@135		sp|Q9NVI1|FANCI_HUMAN@897
sp|Q14978|NOLC1_HUMAN@579		sp|Q15942|ZYX_HUMAN@279		sp|Q7LBC6|KDM3B_HUMAN@1265
sp|Q8IXM2|BAP18_HUMAN@98		sp|P16401|H15_HUMAN@55		sp|Q9BW27|NUP85_HUMAN@494
sp|P09429|HMGB1_HUMAN@30		sp|Q8NC51|SERB1_HUMAN@320		sp|P46940|IQGA1_HUMAN@773
sp|P46087|NOP2_HUMAN@767		sp|Q96T58|MINT_HUMAN@2066		sp|O75937|DNJC8_HUMAN@143
sp|Q86WJ1|CHD1L_HUMAN@263		sp|Q8TBC4|UBA3_HUMAN@409		sp|Q14978|NOLC1_HUMAN@396
sp|Q07666|KHDR1_HUMAN@169		sp|P53041|PPP5_HUMAN@40		sp|Q9Y2W1|TR150_HUMAN@470
sp|P06576|ATPB_HUMAN@426		sp|P24941|CDK2_HUMAN@20		sp|O75879|GATB_HUMAN@529
sp|P48047|ATPO_HUMAN@73		sp|P45880|VDAC2_HUMAN@126		sp|P78527|PRKDC_HUMAN@335
sp|P24539|AT5F1_HUMAN@191		sp|P42566|EPS15_HUMAN@45		sp|P55072|TERA_HUMAN@524
sp|Q13428|TCOF_HUMAN@159		sp|Q99615|DNJC7_HUMAN@42		sp|Q9UBC2|EP15R_HUMAN@502
sp|P52209|6PGD_HUMAN@261		sp|Q9NYU2|UGGG1_HUMAN@362		sp|P62753|RS6_HUMAN@175
sp|P50395|GDIB_HUMAN@164		sp|Q13813|SPTN1_HUMAN@1784		sp|P78344|IF4G2_HUMAN@49
sp|Q8NFW8|NEUA_HUMAN@200		sp|O75534|CSDE1_HUMAN@581		sp|O14979|HNRDL_HUMAN@162
sp|P78347|GTF2I_HUMAN@426		sp|Q86V81|THOC4_HUMAN@164		sp|P62917|RL8_HUMAN@188
sp|P78527|PRKDC_HUMAN@1612		sp|P34897|GLYM_HUMAN@464		sp|P62829|RL23_HUMAN@35
sp|P30049|ATPD_HUMAN@136		sp|P26373|RL13_HUMAN@145		sp|Q9NT62|ATG3_HUMAN@27
sp|P48643|TCPE_HUMAN@226		sp|Q92945|FUBP2_HUMAN@448		sp|Q9UJX2|CDC23_HUMAN@547
sp|Q12931|TRAP1_HUMAN@126		sp|Q9UBT2|SAE2_HUMAN@324		sp|P50454|SERPH_HUMAN@300
sp|P35249|RFC4_HUMAN@33		sp|P02786|TFR1_HUMAN@177		sp|Q92878|RAD50_HUMAN@230
sp|P08133|ANXA6_HUMAN@224		sp|Q8NC51|SERB1_HUMAN@321		sp|O75934|SPF27_HUMAN@158
sp|Q13243|SRSF5_HUMAN@238		sp|O14776|TCRG1_HUMAN@828		sp|Q16352|AINX_HUMAN@197
sp|Q9H501|ESF1_HUMAN@197		sp|Q14157|UBP2L_HUMAN@1071		sp|Q96AG4|LRC59_HUMAN@215
sp|Q5CZC0|FSIP2_HUMAN@297		sp|O14602|IF1AY_HUMAN@88		sp|P34931|HS71L_HUMAN@253
sp|P82914|RT15_HUMAN@247		sp|Q14247|SRC8_HUMAN@205		sp|O75400|PR40A_HUMAN@205
sp|P49327|FAS_HUMAN@1582		sp|Q15643|TRIPB_HUMAN@301		sp|Q6PD62|CTR9_HUMAN@472
sp|Q9NTJ3|SMC4_HUMAN@547		sp|P42285|MTREX_HUMAN@708		sp|Q13242|SRSF9_HUMAN@169
sp|Q9BV57|MTND_HUMAN@73		sp|P40429|RL13A_HUMAN@114		sp|Q9H9B4|SFXN1_HUMAN@202
sp|P08238|HS90B_HUMAN@286		sp|Q9Y383|LC7L2_HUMAN@161		sp|P62266|RS23_HUMAN@108
sp|Q92615|LAR4B_HUMAN@659		sp|O94925|GLSK_HUMAN@121		sp|Q9NYU2|UGGG1_HUMAN@222
sp|P26196|DDX6_HUMAN@352		sp|O95793|STAU1_HUMAN@274		sp|Q99623|PHB2_HUMAN@244
sp|P61254|RL26_HUMAN@136		sp|Q14240|IF4A2_HUMAN@55		sp|Q9BUJ2|HNRL1_HUMAN@270
sp|P16401|H15_HUMAN@37		sp|Q9Y2W1|TR150_HUMAN@461		sp|P49327|FAS_HUMAN@1911
sp|P17987|TCPA_HUMAN@541		sp|O15042|SR140_HUMAN@862		sp|P18621|RL17_HUMAN@167
sp|Q04917|1433F_HUMAN@69		sp|P63241|IF5A1_HUMAN@55		sp|P11171|EPB41_HUMAN@497
sp|Q01518|CAP1_HUMAN@63		sp|O75643|U520_HUMAN@1421		sp|Q9NRW7|VPS45_HUMAN@483
sp|P39023|RL3_HUMAN@148		sp|Q8WXI9|P66B_HUMAN@193		sp|Q12797|ASPH_HUMAN@541
sp|Q9UM00|TMCO1_HUMAN@237		sp|Q02978|M2OM_HUMAN@57		sp|Q9Y3B3|TMED7_HUMAN@83
sp|O75874|IDHC_HUMAN@58		sp|Q12888|TP53B_HUMAN@1563		sp|Q9NRR4|RNC_HUMAN@799
sp|Q96PY6|NEK1_HUMAN@1208		sp|Q9BUJ2|HNRL1_HUMAN@162		sp|Q9Y5K5|UCHL5_HUMAN@234
sp|P49588|SYAC_HUMAN@782		sp|P12956|XRCC6_HUMAN@556		sp|O75419|CDC45_HUMAN@528
sp|P0DMR1|HNRC4_HUMAN@39		sp|P26641|EF1G_HUMAN@219		sp|Q96A26|F162A_HUMAN@62
sp|Q5TEC6|H37_HUMAN@37		sp|O43491|E41L2_HUMAN@83		sp|O15020|SPTN2_HUMAN@1820
sp|Q93077|H2A1C_HUMAN@96		sp|Q9Y4D8|HECD4_HUMAN@182		sp|Q14789|GOGB1_HUMAN@2927
sp|O96017|CHK2_HUMAN@464		sp|P27816|MAP4_HUMAN@938		sp|Q93034|CUL5_HUMAN@10
sp|Q9NTI5|PDS5B_HUMAN@20		sp|Q9NUQ3|TXLNG_HUMAN@292		sp|Q9Y4L1|HYOU1_HUMAN@722
REV_sp|Q8WZ42|TITIN_HUMAN@10946		sp|Q9Y2U8|MAN1_HUMAN@41		sp|Q96N67|DOCK7_HUMAN@2088
REV_sp|O00566|MPP10_HUMAN@62		sp|P49748|ACADV_HUMAN@556		sp|P13667|PDIA4_HUMAN@407
sp|Q13428|TCOF_HUMAN@322		sp|O75083|WDR1_HUMAN@311		sp|A3KN83|SBNO1_HUMAN@925
sp|Q9HB71|CYBP_HUMAN@51		sp|P08708|RS17_HUMAN@19		sp|Q53H96|P5CR3_HUMAN@32
sp|P06733|ENOA_HUMAN@256		sp|P49750|YLPM1_HUMAN@1092		sp|Q9BSD7|NTPCR_HUMAN@165
sp|Q13428|TCOF_HUMAN@579		sp|Q9UK45|LSM7_HUMAN@9		sp|Q9UIJ7|KAD3_HUMAN@146
sp|P39748|FEN1_HUMAN@125		sp|P13667|PDIA4_HUMAN@111		sp|P36957|ODO2_HUMAN@217
sp|P00491|PNPH_HUMAN@265		sp|Q9P289|STK26_HUMAN@245		sp|P11388|TOP2A_HUMAN@1433
sp|P26038|MOES_HUMAN@400		sp|P21266|GSTM3_HUMAN@73		sp|P12277|KCRB_HUMAN@304
sp|Q96N67|DOCK7_HUMAN@2102		sp|O43447|PPIH_HUMAN@153		sp|Q86UP2|KTN1_HUMAN@285
sp|P36578|RL4_HUMAN@384		sp|P78527|PRKDC_HUMAN@1857		sp|O75396|SC22B_HUMAN@178
sp|Q9NX63|MIC19_HUMAN@173		sp|P36578|RL4_HUMAN@368		sp|O43447|PPIH_HUMAN@38
sp|Q9NW13|RBM28_HUMAN@430		sp|P16402|H13_HUMAN@160		sp|Q9NRW7|VPS45_HUMAN@418
sp|P49756|RBM25_HUMAN@685		sp|P04075|ALDOA_HUMAN@330		sp|Q05519|SRS11_HUMAN@419
sp|P21333|FLNA_HUMAN@1071		sp|P33991|MCM4_HUMAN@752		sp|Q13098|CSN1_HUMAN@153
sp|P13797|PLST_HUMAN@611		sp|Q92615|LAR4B_HUMAN@311		sp|Q6PI48|SYDM_HUMAN@133
sp|P62136|PP1A_HUMAN@305		sp|P17980|PRS6A_HUMAN@432		sp|P78347|GTF2I_HUMAN@494
sp|Q00325|S25A3_HUMAN@209		sp|Q13164|MK07_HUMAN@84		sp|P45880|VDAC2_HUMAN@31
sp|P09874|PARP1_HUMAN@796		sp|Q9GZS1|RPA49_HUMAN@170		sp|P62917|RL8_HUMAN@181
sp|O75643|U520_HUMAN@349		sp|P50991|TCPD_HUMAN@395		sp|P23786|CPT2_HUMAN@69
sp|P62750|RL23A_HUMAN@110		sp|Q5T8P6|RBM26_HUMAN@523		sp|Q08170|SRSF4_HUMAN@212
sp|O15269|SPTC1_HUMAN@126		sp|P38432|COIL_HUMAN@444		sp|Q09666|AHNK_HUMAN@5307
sp|P23396|RS3_HUMAN@75		sp|Q8WVY7|UBCP1_HUMAN@51		sp|O15347|HMGB3_HUMAN@165
sp|Q9Y266|NUDC_HUMAN@96		sp|P35579|MYH9_HUMAN@1024		sp|O75116|ROCK2_HUMAN@1022
sp|P62753|RS6_HUMAN@58		sp|Q92878|RAD50_HUMAN@343		sp|Q7Z460|CLAP1_HUMAN@716
sp|Q8N3U4|STAG2_HUMAN@949		sp|O43242|PSMD3_HUMAN@54		sp|P24539|AT5F1_HUMAN@131
sp|Q32MZ4|LRRF1_HUMAN@289		sp|P62847|RS24_HUMAN@122		sp|Q8N766|EMC1_HUMAN@52
sp|P34932|HSP74_HUMAN@754		sp|P57678|GEMI4_HUMAN@395		sp|P14618|KPYM_HUMAN@207
sp|Q14204|DYHC1_HUMAN@1912		sp|P01023|A2MG_HUMAN@115		sp|Q8N3U4|STAG2_HUMAN@363
sp|Q86UP2|KTN1_HUMAN@1296		sp|Q9NQC3|RTN4_HUMAN@1171		sp|P27361|MK03_HUMAN@294
sp|Q96A08|H2B1A_HUMAN@59		sp|P49207|RL34_HUMAN@19		sp|Q9NW13|RBM28_HUMAN@269
sp|Q16891|MIC60_HUMAN@180		sp|Q8IUD2|RB6I2_HUMAN@894		sp|Q8IUE6|H2A2B_HUMAN@120
sp|P07900|HS90A_HUMAN@485		sp|Q9Y2Q3|GSTK1_HUMAN@163		sp|P78417|GSTO1_HUMAN@160
sp|Q9NX63|MIC19_HUMAN@76		sp|P20042|IF2B_HUMAN@205		sp|Q05048|CSTF1_HUMAN@204
sp|P09874|PARP1_HUMAN@505		sp|Q00610|CLH1_HUMAN@367		sp|P98175|RBM10_HUMAN@699
sp|Q16629|SRSF7_HUMAN@12		sp|Q9Y6W5|WASF2_HUMAN@290		sp|Q05682|CALD1_HUMAN@733
sp|P23528|COF1_HUMAN@164		sp|Q9P2E9|RRBP1_HUMAN@720		sp|O75298|RTN2_HUMAN@352
sp|P05204|HMGN2_HUMAN@82		sp|P62847|RS24_HUMAN@32		sp|P50851|LRBA_HUMAN@1806
sp|Q9GZR7|DDX24_HUMAN@161		sp|Q8IWZ8|SUGP1_HUMAN@194		sp|O75746|S2512_HUMAN@403
sp|O95202|LETM1_HUMAN@679		sp|Q9BQG0|MBB1A_HUMAN@631		sp|Q9BYB4|GNB1L_HUMAN@266
sp|Q13428|TCOF_HUMAN@918		sp|P35268|RL22_HUMAN@10		sp|Q53H12|AGK_HUMAN@184
sp|Q969H8|MYDGF_HUMAN@137		sp|P30084|ECHM_HUMAN@282		sp|O60256|KPRB_HUMAN@194
sp|P07814|SYEP_HUMAN@870		sp|Q9UNZ2|NSF1C_HUMAN@124		sp|Q9BR61|ACBD6_HUMAN@120
sp|Q9Y4W6|AFG32_HUMAN@331		sp|P84103|SRSF3_HUMAN@146		REV_sp|P30622|CLIP1_HUMAN@850
sp|O95983|MBD3_HUMAN@122		sp|Q16513|PKN2_HUMAN@247		sp|P50758|VE1_HPV20@400
sp|P15311|EZRI_HUMAN@233		sp|Q12996|CSTF3_HUMAN@392		sp|Q6PKG0|LARP1_HUMAN@160
sp|Q5TEC6|H37_HUMAN@57		sp|Q9NVH1|DJC11_HUMAN@31		sp|P09874|PARP1_HUMAN@940
sp|Q00059|TFAM_HUMAN@95		sp|P46776|RL27A_HUMAN@119		sp|O75947|ATP5H_HUMAN@78
sp|P43487|RANG_HUMAN@150		sp|P54920|SNAA_HUMAN@222		sp|P02786|TFR1_HUMAN@53
sp|P04637|P53_HUMAN@351		sp|P35659|DEK_HUMAN@272		sp|Q99832|TCPH_HUMAN@320
sp|P58546|MTPN_HUMAN@19		sp|Q16352|AINX_HUMAN@290		sp|Q06203|PUR1_HUMAN@372
sp|P60228|EIF3E_HUMAN@275		sp|Q9NZN4|EHD2_HUMAN@315		sp|O00159|MYO1C_HUMAN@882
sp|Q05682|CALD1_HUMAN@690		sp|O14964|HGS_HUMAN@521		sp|Q14152|EIF3A_HUMAN@409
sp|Q9BZZ5|API5_HUMAN@356		sp|P78347|GTF2I_HUMAN@734		sp|Q9Y2W1|TR150_HUMAN@668
REV_sp|Q9Y6N9|USH1C_HUMAN@210		sp|Q02790|FKBP4_HUMAN@409		sp|Q5VYK3|ECM29_HUMAN@392
sp|Q13451|FKBP5_HUMAN@60		sp|O14980|XPO1_HUMAN@686		sp|O94826|TOM70_HUMAN@359
sp|Q9NQZ2|SAS10_HUMAN@213		sp|Q9BZD4|NUF2_HUMAN@348		sp|Q96DV4|RM38_HUMAN@305
sp|Q99623|PHB2_HUMAN@262		sp|P11586|C1TC_HUMAN@21		sp|Q00688|FKBP3_HUMAN@94
sp|Q5VT52|RPRD2_HUMAN@1163		REV_sp|P12296|POLG_ENMGO@1778		sp|Q96AG4|LRC59_HUMAN@71
sp|Q15843|NEDD8_HUMAN@48		sp|P29401|TKT_HUMAN@310		sp|O60566|BUB1B_HUMAN@454
sp|P82914|RT15_HUMAN@228		sp|P14625|ENPL_HUMAN@474		sp|Q15393|SF3B3_HUMAN@137
sp|Q15075|EEA1_HUMAN@1197		sp|P61803|DAD1_HUMAN@82		sp|O14745|NHRF1_HUMAN@34
sp|Q09666|AHNK_HUMAN@2850		sp|Q53GQ0|DHB12_HUMAN@249		sp|Q16891|MIC60_HUMAN@306
REV_sp|Q8NDH2|CC168_HUMAN@1181		sp|Q14696|MESD_HUMAN@106		sp|Q8IXK0|PHC2_HUMAN@598
sp|P52926|HMGA2_HUMAN@62		sp|Q70UQ0|IKIP_HUMAN@243		sp|P49189|AL9A1_HUMAN@246
sp|Q13618|CUL3_HUMAN@673		sp|Q13126|MTAP_HUMAN@157		sp|Q5SRH9|TT39A_HUMAN@426
sp|P08559|ODPA_HUMAN@385		sp|P62979|RS27A_HUMAN@11		sp|P05388|RLA0_HUMAN@297
sp|P46060|RAGP1_HUMAN@452		sp|P39023|RL3_HUMAN@300		sp|Q15084|PDIA6_HUMAN@160
sp|P35580|MYH10_HUMAN@1842		sp|P16104|H2AX_HUMAN@128		sp|P68036|UB2L3_HUMAN@67
sp|P21333|FLNA_HUMAN@1477		sp|Q9H845|ACAD9_HUMAN@459		sp|Q3L8U1|CHD9_HUMAN@1328
sp|P52815|RM12_HUMAN@178		sp|Q29RF7|PDS5A_HUMAN@551		sp|Q13901|C1D_HUMAN@46
sp|Q7KZF4|SND1_HUMAN@651		sp|P25705|ATPA_HUMAN@132		sp|P18206|VINC_HUMAN@444
sp|P26885|FKBP2_HUMAN@30		sp|P08758|ANXA5_HUMAN@76		sp|P23588|IF4B_HUMAN@577
sp|Q14008|CKAP5_HUMAN@556		sp|Q15365|PCBP1_HUMAN@314		REV_sp|A0A7H0DNH0|PG003_MONPV@46
sp|Q12874|SF3A3_HUMAN@291		sp|P78371|TCPB_HUMAN@135		sp|Q9NR46|SHLB2_HUMAN@79
sp|Q13428|TCOF_HUMAN@1224		sp|Q15286|RAB35_HUMAN@189		sp|Q96QC0|PP1RA_HUMAN@26
sp|O43148|MCES_HUMAN@126		sp|O76021|RL1D1_HUMAN@120		sp|O60264|SMCA5_HUMAN@644
sp|Q9Y4G6|TLN2_HUMAN@2465		sp|Q9NTK5|OLA1_HUMAN@394		sp|P50914|RL14_HUMAN@182
sp|P30405|PPIF_HUMAN@57		sp|Q14739|LBR_HUMAN@508		sp|Q9UEE9|CFDP1_HUMAN@150
sp|P61758|PFD3_HUMAN@59		sp|Q9Y3D9|RT23_HUMAN@108		sp|P23396|RS3_HUMAN@202
sp|Q9H307|PININ_HUMAN@157		sp|P82979|SARNP_HUMAN@119		sp|Q14683|SMC1A_HUMAN@854
sp|Q9P2J5|SYLC_HUMAN@1047		sp|Q9UMS4|PRP19_HUMAN@192		sp|Q8N3U4|STAG2_HUMAN@551
sp|A1X283|SPD2B_HUMAN@838		sp|P49792|RBP2_HUMAN@1977		REV_sp|Q8TBY8|PMFBP_HUMAN@637
sp|P62277|RS13_HUMAN@43		sp|O00203|AP3B1_HUMAN@512		sp|Q14204|DYHC1_HUMAN@4422
REV_sp|Q9UMQ6|CAN11_HUMAN@627		sp|O75369|FLNB_HUMAN@349		sp|Q9Y3D6|FIS1_HUMAN@25
sp|P25440|BRD2_HUMAN@614		sp|Q9NUM4|T106B_HUMAN@124		sp|Q9HDC9|APMAP_HUMAN@87
sp|P41250|GARS_HUMAN@506		sp|Q08J23|NSUN2_HUMAN@654		sp|O75063|XYLK_HUMAN@98
sp|P12270|TPR_HUMAN@755		sp|Q13442|HAP28_HUMAN@137		sp|Q8N9N7|LRC57_HUMAN@35
sp|Q99623|PHB2_HUMAN@224		sp|P06753|TPM3_HUMAN@129		sp|Q5JPB2|ZN831_HUMAN@1287
sp|P19338|NUCL_HUMAN@102		sp|P27708|PYR1_HUMAN@1869		sp|P16885|PLCG2_HUMAN@862
sp|P19367|HXK1_HUMAN@333		sp|Q9BUL8|PDC10_HUMAN@53		sp|Q16850|CP51A_HUMAN@442
sp|Q9NUP9|LIN7C_HUMAN@161		sp|Q15907|RB11B_HUMAN@58		sp|O96017|CHK2_HUMAN@249
sp|Q9BWU0|NADAP_HUMAN@402		sp|P07305|H10_HUMAN@82		sp|P53680|AP2S1_HUMAN@130
sp|P04406|G3P_HUMAN@219		sp|Q16778|H2B2E_HUMAN@6		REV_sp|Q99996|AKAP9_HUMAN@964
sp|O75964|ATP5L_HUMAN@24		sp|Q9NTJ3|SMC4_HUMAN@434		sp|Q12769|NU160_HUMAN@1331
sp|P62424|RL7A_HUMAN@150		sp|P07814|SYEP_HUMAN@173		sp|Q16204|CCDC6_HUMAN@234
sp|Q68CQ4|UTP25_HUMAN@201		sp|Q9Y5X3|SNX5_HUMAN@324		sp|Q14684|RRP1B_HUMAN@38
sp|P62277|RS13_HUMAN@39		sp|Q96BR5|COA7_HUMAN@206		sp|P32119|PRDX2_HUMAN@196
sp|Q8ND56|LS14A_HUMAN@174		sp|Q15555|MARE2_HUMAN@235		sp|P38606|VATA_HUMAN@467
sp|P61513|RL37A_HUMAN@7		sp|P06733|ENOA_HUMAN@233		REV_sp|Q96JM3|CHAP1_HUMAN@533
sp|O94905|ERLN2_HUMAN@273		sp|P26599|PTBP1_HUMAN@266		sp|Q99459|CDC5L_HUMAN@694
sp|P19338|NUCL_HUMAN@80		sp|P32119|PRDX2_HUMAN@16		sp|Q13618|CUL3_HUMAN@700
sp|P84098|RL19_HUMAN@133		sp|Q9BXW9|FACD2_HUMAN@322		sp|P40429|RL13A_HUMAN@53
sp|P13995|MTDC_HUMAN@50		sp|P26641|EF1G_HUMAN@243		sp|P34932|HSP74_HUMAN@736
sp|Q9Y4L1|HYOU1_HUMAN@67		sp|P46063|RECQ1_HUMAN@626		sp|Q86UP2|KTN1_HUMAN@265
sp|Q00169|PIPNA_HUMAN@162		sp|O95251|KAT7_HUMAN@90		sp|P14999|LT_POVBA@513
sp|Q15652|JHD2C_HUMAN@624		sp|Q15293|RCN1_HUMAN@86		sp|Q15031|SYLM_HUMAN@628
sp|P12268|IMDH2_HUMAN@293		sp|O00571|DDX3X_HUMAN@64		sp|Q9H910|JUPI2_HUMAN@176
REV_sp|K9N7C7|R1AB_MERS1@4495		sp|Q9Y2W1|TR150_HUMAN@221		sp|Q08752|PPID_HUMAN@332
sp|O15372|EIF3H_HUMAN@188		sp|P49720|PSB3_HUMAN@77		sp|Q16851|UGPA_HUMAN@69
sp|Q9Y673|ALG5_HUMAN@118		sp|P59998|ARPC4_HUMAN@44		sp|Q03001|DYST_HUMAN@5436
sp|O95202|LETM1_HUMAN@446		sp|P11940|PABP1_HUMAN@625		sp|Q86VP6|CAND1_HUMAN@441
sp|Q52LJ0|FA98B_HUMAN@256		sp|O95801|TTC4_HUMAN@343		sp|P55263|ADK_HUMAN@264
sp|P55884|EIF3B_HUMAN@734		sp|P07737|PROF1_HUMAN@108		sp|Q5T8P6|RBM26_HUMAN@792
sp|P31937|3HIDH_HUMAN@125		sp|P62857|RS28_HUMAN@16		sp|O60841|IF2P_HUMAN@936
REV_sp|Q9UKA2|FBXL4_HUMAN@357		sp|P27695|APEX1_HUMAN@52		sp|P12532|KCRU_HUMAN@280
sp|P62841|RS15_HUMAN@72		sp|P19338|NUCL_HUMAN@577		sp|Q5IFJ7|RL9_MACFA@2
sp|P0DMV9|HS71B_HUMAN@112		sp|Q9Y3C8|UFC1_HUMAN@17		sp|Q9NX14|NDUBB_HUMAN@46
sp|P23193|TCEA1_HUMAN@55		sp|P12235|ADT1_HUMAN@43		sp|P25440|BRD2_HUMAN@342
sp|Q14151|SAFB2_HUMAN@562		sp|A5PLK6|RGSL_HUMAN@60		sp|Q15061|WDR43_HUMAN@391
sp|Q7Z417|NUFP2_HUMAN@322		sp|P34932|HSP74_HUMAN@194		sp|Q8WYA6|CTBL1_HUMAN@102
sp|Q9UNZ5|L10K_HUMAN@87		sp|Q7L2E3|DHX30_HUMAN@830		sp|Q9H8S9|MOB1A_HUMAN@142
sp|P55084|ECHB_HUMAN@41		sp|P21912|SDHB_HUMAN@261		sp|Q8IWX8|CHERP_HUMAN@18
sp|P30520|PURA2_HUMAN@157		sp|Q9BWD1|THIC_HUMAN@180		sp|A6NHR9|SMHD1_HUMAN@388
sp|P53990|IST1_HUMAN@48		sp|P14625|ENPL_HUMAN@473		sp|O15042|SR140_HUMAN@418
sp|P26885|FKBP2_HUMAN@103		sp|Q02878|RL6_HUMAN@260		sp|O75165|DJC13_HUMAN@2156
sp|Q7Z478|DHX29_HUMAN@401		sp|P05026|AT1B1_HUMAN@288		sp|Q9P2R3|ANFY1_HUMAN@217
sp|O00483|NDUA4_HUMAN@55		sp|O43615|TIM44_HUMAN@130		sp|Q9Y295|DRG1_HUMAN@46
sp|P56181|NDUV3_HUMAN@43		sp|Q07666|KHDR1_HUMAN@185		sp|Q8N122|RPTOR_HUMAN@207
sp|Q9Y2Q9|RT28_HUMAN@43		sp|P19338|NUCL_HUMAN@324		sp|Q7Z739|YTHD3_HUMAN@399
sp|Q9BPX3|CND3_HUMAN@522		sp|Q14697|GANAB_HUMAN@217		sp|O14653|GOSR2_HUMAN@159
sp|P62280|RS11_HUMAN@79		sp|P09874|PARP1_HUMAN@571		sp|P26639|SYTC_HUMAN@75
sp|O75152|ZC11A_HUMAN@413		sp|P78371|TCPB_HUMAN@230		sp|O75643|U520_HUMAN@1134
sp|P28370|SMCA1_HUMAN@320		sp|O00567|NOP56_HUMAN@578		sp|P18669|PGAM1_HUMAN@138
sp|Q9H2P0|ADNP_HUMAN@600		sp|Q9UBM1|PEMT_HUMAN@191		sp|Q92598|HS105_HUMAN@356
sp|Q14978|NOLC1_HUMAN@201		sp|Q14691|PSF1_HUMAN@63		sp|P56192|SYMC_HUMAN@838
sp|Q3MHD2|LSM12_HUMAN@177		sp|Q13310|PABP4_HUMAN@78		sp|Q9BQG0|MBB1A_HUMAN@1167
sp|P62258|1433E_HUMAN@69		sp|Q9H299|SH3L3_HUMAN@18		sp|P30520|PURA2_HUMAN@403
sp|Q9NZ01|TECR_HUMAN@60		sp|O60749|SNX2_HUMAN@487		sp|Q16181|SEPT7_HUMAN@238
sp|P62979|RS27A_HUMAN@107		sp|Q93077|H2A1C_HUMAN@120		sp|Q00839|HNRPU_HUMAN@670
sp|P13639|EF2_HUMAN@318		sp|Q01082|SPTB2_HUMAN@1824		sp|P31942|HNRH3_HUMAN@76
sp|Q07955|SRSF1_HUMAN@30		sp|Q14185|DOCK1_HUMAN@1172		sp|Q9UQN3|CHM2B_HUMAN@51
sp|P13639|EF2_HUMAN@629		sp|Q6V1Q2|L_EBOZ5@388		sp|Q9UNH7|SNX6_HUMAN@109
sp|P09972|ALDOC_HUMAN@111		REV_sp|Q9C0D2|CE295_HUMAN@2451		sp|Q86UP2|KTN1_HUMAN@835
sp|P09874|PARP1_HUMAN@667		sp|Q00341|VIGLN_HUMAN@494		sp|Q5VIR6|VPS53_HUMAN@253
sp|Q96S66|CLCC1_HUMAN@470		sp|Q9NZN4|EHD2_HUMAN@375		sp|O75937|DNJC8_HUMAN@105
sp|Q00839|HNRPU_HUMAN@516		sp|O75947|ATP5H_HUMAN@73		sp|Q8WUH6|TM263_HUMAN@104
sp|Q8NC51|SERB1_HUMAN@294		sp|Q9P0L0|VAPA_HUMAN@154		sp|P08238|HS90B_HUMAN@568
sp|Q9Y450|HBS1L_HUMAN@161		sp|P46087|NOP2_HUMAN@79		REV_sp|Q9Y5Y9|SCNAA_HUMAN@1712
REV_sp|Q9NZJ4|SACS_HUMAN@996		sp|Q96I25|SPF45_HUMAN@46		sp|P06396|GELS_HUMAN@239
sp|Q92945|FUBP2_HUMAN@628		sp|P82979|SARNP_HUMAN@199		sp|P00558|PGK1_HUMAN@191
sp|Q15428|SF3A2_HUMAN@91		sp|O60749|SNX2_HUMAN@469		sp|Q9UBJ2|ABCD2_HUMAN@614
sp|P21333|FLNA_HUMAN@684		sp|P31946|1433B_HUMAN@70		sp|O14979|HNRDL_HUMAN@216
sp|P09012|SNRPA_HUMAN@88		sp|P21796|VDAC1_HUMAN@61		sp|Q9H3P7|GCP60_HUMAN@469
sp|Q15397|PUM3_HUMAN@623		sp|Q9UQE7|SMC3_HUMAN@889		sp|Q9Y3Z3|SAMH1_HUMAN@486
sp|P84074|HPCA_HUMAN@174		sp|P57678|GEMI4_HUMAN@497		sp|Q92598|HS105_HUMAN@585
sp|Q9UQE7|SMC3_HUMAN@895		sp|P20042|IF2B_HUMAN@293		sp|P12270|TPR_HUMAN@433
sp|P23588|IF4B_HUMAN@586		sp|Q13428|TCOF_HUMAN@1273		sp|Q7Z434|MAVS_HUMAN@7
sp|P46087|NOP2_HUMAN@669		sp|Q14118|DAG1_HUMAN@782		sp|Q9NQC3|RTN4_HUMAN@1183
sp|Q5UIP0|RIF1_HUMAN@1300		sp|Q9Y6D9|MD1L1_HUMAN@351		sp|P52926|HMGA2_HUMAN@26
sp|P63220|RS21_HUMAN@41		sp|Q6YN16|HSDL2_HUMAN@284		sp|Q13428|TCOF_HUMAN@803
sp|P34932|HSP74_HUMAN@329		sp|O43324|MCA3_HUMAN@88		sp|Q9NTI5|PDS5B_HUMAN@121
sp|Q15836|VAMP3_HUMAN@66		sp|Q9H1E3|NUCKS_HUMAN@196		sp|Q6YN16|HSDL2_HUMAN@32
sp|P51532|SMCA4_HUMAN@991		sp|P78527|PRKDC_HUMAN@3552		sp|Q02218|ODO1_HUMAN@899
sp|Q14980|NUMA1_HUMAN@1616		sp|P47985|UCRI_HUMAN@182		sp|O43660|PLRG1_HUMAN@68
sp|Q07866|KLC1_HUMAN@382		sp|P53618|COPB_HUMAN@651		sp|Q569K6|CC157_HUMAN@169
sp|P06744|G6PI_HUMAN@116		sp|P16403|H12_HUMAN@119		sp|O75874|IDHC_HUMAN@345
sp|P35221|CTNA1_HUMAN@683		sp|P14735|IDE_HUMAN@929		sp|Q86U44|MTA70_HUMAN@27
sp|P54709|AT1B3_HUMAN@182		sp|O60762|DPM1_HUMAN@136		sp|Q5T9A4|ATD3B_HUMAN@44
sp|P07339|CATD_HUMAN@348		sp|Q9Y5B9|SP16H_HUMAN@184		sp|P30876|RPB2_HUMAN@151
sp|Q70UQ0|IKIP_HUMAN@288		sp|P61221|ABCE1_HUMAN@332		sp|P02786|TFR1_HUMAN@145
sp|Q7LBC6|KDM3B_HUMAN@449		sp|Q9UI09|NDUAC_HUMAN@43		sp|Q8NE71|ABCF1_HUMAN@119
sp|P22307|SCP2_HUMAN@453		sp|P14618|KPYM_HUMAN@188		sp|Q3SY69|AL1L2_HUMAN@886
sp|Q15459|SF3A1_HUMAN@754		sp|P49207|RL34_HUMAN@101		sp|P20700|LMNB1_HUMAN@483
sp|Q14978|NOLC1_HUMAN@601		sp|P33778|H2B1B_HUMAN@86		sp|P08238|HS90B_HUMAN@428
sp|O43768|ENSA_HUMAN@107		sp|Q8N8S7|ENAH_HUMAN@461		sp|P61353|RL27_HUMAN@93
sp|P09874|PARP1_HUMAN@87		sp|Q8TEK3|DOT1L_HUMAN@461		sp|Q9ULW0|TPX2_HUMAN@485
sp|P13639|EF2_HUMAN@42		sp|P23919|KTHY_HUMAN@59		sp|P32322|P5CR1_HUMAN@283
sp|O00178|GTPB1_HUMAN@565		sp|P06744|G6PI_HUMAN@252		sp|P54577|SYYC_HUMAN@356
sp|Q4VCS5|AMOT_HUMAN@520		sp|P78527|PRKDC_HUMAN@2746		sp|P50991|TCPD_HUMAN@288
sp|P25705|ATPA_HUMAN@531		sp|Q9NX46|ADPRS_HUMAN@109		sp|O75947|ATP5H_HUMAN@72
sp|Q96RP9|EFGM_HUMAN@745		sp|P42166|LAP2A_HUMAN@98		sp|P04181|OAT_HUMAN@66
sp|Q9UII2|ATIF1_HUMAN@71		sp|P52815|RM12_HUMAN@183		sp|Q9ULW0|TPX2_HUMAN@565
sp|Q8IYY4|DZI1L_HUMAN@85		sp|Q96T37|RBM15_HUMAN@740		sp|Q9NW13|RBM28_HUMAN@322
sp|Q9H2U1|DHX36_HUMAN@829		sp|Q9HB71|CYBP_HUMAN@212		sp|O60869|EDF1_HUMAN@79
sp|O60739|EIF1B_HUMAN@42		sp|Q9BY67|CADM1_HUMAN@187		sp|Q01118|SCN7A_HUMAN@1583
sp|P12270|TPR_HUMAN@1169		sp|P83881|RL36A_HUMAN@86		sp|P26639|SYTC_HUMAN@12
sp|P14618|KPYM_HUMAN@261		sp|Q9BQA1|MEP50_HUMAN@3		REV_sp|Q75T13|PGAP1_HUMAN@442
sp|P40926|MDHM_HUMAN@157		sp|Q14247|SRC8_HUMAN@272		sp|P43243|MATR3_HUMAN@522
sp|P25205|MCM3_HUMAN@283		sp|P07814|SYEP_HUMAN@977		sp|Q13813|SPTN1_HUMAN@2098
sp|P23246|SFPQ_HUMAN@208		REV_sp|P21817|RYR1_HUMAN@2097		sp|Q92945|FUBP2_HUMAN@654
sp|P53621|COPA_HUMAN@1028		sp|Q8WVY7|UBCP1_HUMAN@33		sp|Q86UP2|KTN1_HUMAN@525
sp|Q06830|PRDX1_HUMAN@37		sp|P35579|MYH9_HUMAN@682		sp|Q09666|AHNK_HUMAN@4758
sp|P11142|HSP7C_HUMAN@187		sp|P35221|CTNA1_HUMAN@695		sp|P84095|RHOG_HUMAN@183
REV_sp|Q8IZT6|ASPM_HUMAN@2397		REV_sp|P11137|MTAP2_HUMAN@99		sp|P49792|RBP2_HUMAN@2513
sp|Q01105|SET_HUMAN@172		sp|Q16763|UBE2S_HUMAN@197		sp|P22102|PUR2_HUMAN@438
sp|P09874|PARP1_HUMAN@97		sp|P55265|DSRAD_HUMAN@798		sp|P31040|SDHA_HUMAN@485
sp|O95983|MBD3_HUMAN@129		sp|P61247|RS3A_HUMAN@46		sp|P13667|PDIA4_HUMAN@629
sp|Q6P1J9|CDC73_HUMAN@186		sp|P49448|DHE4_HUMAN@390		sp|O00203|AP3B1_HUMAN@90
sp|P17980|PRS6A_HUMAN@211		sp|P08574|CY1_HUMAN@170		sp|O43390|HNRPR_HUMAN@414
sp|P78347|GTF2I_HUMAN@450		sp|P13639|EF2_HUMAN@258		sp|P11142|HSP7C_HUMAN@112
sp|Q9H307|PININ_HUMAN@109		sp|P41252|SYIC_HUMAN@1051		sp|Q9Y6K9|NEMO_HUMAN@326
sp|P40763|STAT3_HUMAN@87		sp|P14618|KPYM_HUMAN@266		sp|P09622|DLDH_HUMAN@143
sp|P83731|RL24_HUMAN@77		sp|Q9H7B2|RPF2_HUMAN@252		sp|P18124|RL7_HUMAN@9
sp|P55060|XPO2_HUMAN@481		sp|Q9HB71|CYBP_HUMAN@118		sp|O60749|SNX2_HUMAN@287
sp|O14681|EI24_HUMAN@335		sp|Q99598|TSNAX_HUMAN@14		sp|Q8N183|NDUF2_HUMAN@20
sp|Q8NE71|ABCF1_HUMAN@748		sp|O75663|TIPRL_HUMAN@128		sp|Q9GZY8|MFF_HUMAN@302
REV_sp|A2A2Z9|AN18B_HUMAN@137		sp|O00560|SDCB1_HUMAN@176		sp|Q96F24|NRBF2_HUMAN@197
sp|P53999|TCP4_HUMAN@29		sp|P07954|FUMH_HUMAN@66		sp|P11021|BIP_HUMAN@138
sp|P61006|RAB8A_HUMAN@190		sp|Q14204|DYHC1_HUMAN@4594		sp|P11142|HSP7C_HUMAN@423
sp|P40855|PEX19_HUMAN@33		sp|O95202|LETM1_HUMAN@465		sp|Q6PIU2|NCEH1_HUMAN@152
sp|P08238|HS90B_HUMAN@531		sp|O75369|FLNB_HUMAN@272		sp|P62899|RL31_HUMAN@70
sp|Q96LR5|UB2E2_HUMAN@48		sp|Q86YP4|P66A_HUMAN@459		sp|P19784|CSK22_HUMAN@103
sp|Q13838|DX39B_HUMAN@183		sp|O75369|FLNB_HUMAN@677		sp|P14618|KPYM_HUMAN@206
REV_sp|B5MCY1|TDR15_HUMAN@330		sp|Q9Y6C9|MTCH2_HUMAN@122		sp|O75747|P3C2G_HUMAN@1383
sp|Q9NPA8|ENY2_HUMAN@84		sp|O43776|SYNC_HUMAN@104		sp|Q96PK6|RBM14_HUMAN@630
sp|Q16891|MIC60_HUMAN@297		sp|P54577|SYYC_HUMAN@412		sp|P27816|MAP4_HUMAN@802
sp|P21796|VDAC1_HUMAN@115		sp|Q13148|TADBP_HUMAN@145		sp|P83916|CBX1_HUMAN@139
sp|P68371|TBB4B_HUMAN@58		sp|Q5VYK3|ECM29_HUMAN@1217		sp|Q14320|FA50A_HUMAN@82
sp|Q13601|KRR1_HUMAN@303		sp|P60891|PRPS1_HUMAN@18		sp|O00418|EF2K_HUMAN@516
sp|P27635|RL10_HUMAN@188		sp|P16402|H13_HUMAN@120		sp|Q96FZ2|HMCES_HUMAN@109
sp|P48739|PIPNB_HUMAN@215		sp|Q9H7C9|AAMDC_HUMAN@87		sp|Q99848|EBP2_HUMAN@91
sp|Q9H9S3|S61A2_HUMAN@268		sp|Q29RF7|PDS5A_HUMAN@1211		sp|Q5VTE0|EF1A3_HUMAN@273
sp|Q14204|DYHC1_HUMAN@4089		sp|Q14444|CAPR1_HUMAN@234		sp|Q9NR46|SHLB2_HUMAN@185
sp|P0C0S5|H2AZ_HUMAN@126		sp|P62701|RS4X_HUMAN@211		sp|O75694|NU155_HUMAN@1069
sp|P08238|HS90B_HUMAN@284		sp|P08670|VIME_HUMAN@104		sp|Q9NZI8|IF2B1_HUMAN@566
sp|P09622|DLDH_HUMAN@410		sp|Q9UHD8|SEPT9_HUMAN@99		sp|P35611|ADDA_HUMAN@21
sp|Q9Y266|NUDC_HUMAN@297		sp|Q9BW72|HIG2A_HUMAN@36		sp|Q10471|GALT2_HUMAN@161
sp|P62857|RS28_HUMAN@47		sp|O95456|PSMG1_HUMAN@264		sp|P41250|GARS_HUMAN@108
sp|P55769|NH2L1_HUMAN@20		sp|P20700|LMNB1_HUMAN@271		sp|P49792|RBP2_HUMAN@997
sp|Q14974|IMB1_HUMAN@62		sp|Q7Z4V5|HDGR2_HUMAN@414		sp|P50990|TCPQ_HUMAN@367
sp|Q12996|CSTF3_HUMAN@49		sp|P46013|KI67_HUMAN@2309		sp|P52948|NUP98_HUMAN@1040
sp|P23528|COF1_HUMAN@30		sp|Q15120|PDK3_HUMAN@134		sp|Q9Y5K6|CD2AP_HUMAN@415
sp|Q86UP2|KTN1_HUMAN@777		sp|Q13618|CUL3_HUMAN@444		sp|Q9UKA9|PTBP2_HUMAN@137
sp|Q9BY44|EIF2A_HUMAN@505		sp|P16402|H13_HUMAN@149		sp|P43246|MSH2_HUMAN@113
sp|Q9Y265|RUVB1_HUMAN@7		REV_sp|Q9Y6K5|OAS3_HUMAN@652		sp|P12270|TPR_HUMAN@84
sp|Q5BKZ1|ZN326_HUMAN@459		sp|Q96BI3|APH1A_HUMAN@96		sp|Q9NWH9|SLTM_HUMAN@352
sp|O95197|RTN3_HUMAN@1018		sp|P06737|PYGL_HUMAN@421		sp|Q13427|PPIG_HUMAN@650
sp|P53396|ACLY_HUMAN@97		sp|Q13616|CUL1_HUMAN@337		sp|Q13596|SNX1_HUMAN@429
sp|P09651|ROA1_HUMAN@350		sp|P62333|PRS10_HUMAN@298		sp|Q15007|FL2D_HUMAN@155
sp|Q8IY18|SMC5_HUMAN@31		sp|Q13813|SPTN1_HUMAN@2195		sp|P50897|PPT1_HUMAN@174
sp|P63173|RL38_HUMAN@57		sp|P18206|VINC_HUMAN@768		sp|Q14204|DYHC1_HUMAN@1115
sp|Q9BRT6|LLPH_HUMAN@54		sp|P09874|PARP1_HUMAN@684		sp|Q9HAH7|FBRS_HUMAN@298
sp|A6NCI8|CB078_HUMAN@472		sp|P78527|PRKDC_HUMAN@2715		REV_sp|Q99466|NOTC4_HUMAN@489
sp|P13010|XRCC5_HUMAN@532		sp|P21912|SDHB_HUMAN@123		sp|P41252|SYIC_HUMAN@864
sp|P05023|AT1A1_HUMAN@726		sp|Q92616|GCN1_HUMAN@1556		sp|Q9BRJ2|RM45_HUMAN@135
sp|Q14204|DYHC1_HUMAN@3471		sp|Q14978|NOLC1_HUMAN@186		sp|Q96GQ7|DDX27_HUMAN@418
sp|P62829|RL23_HUMAN@69		sp|Q14980|NUMA1_HUMAN@1518		sp|P46940|IQGA1_HUMAN@348
sp|Q15555|MARE2_HUMAN@193		sp|O14980|XPO1_HUMAN@693		sp|Q9BTE7|DCNL5_HUMAN@139
sp|O43809|CPSF5_HUMAN@29		sp|O75439|MPPB_HUMAN@219		REV_sp|Q8IUD2|RB6I2_HUMAN@838
sp|P12814|ACTN1_HUMAN@89		sp|Q4VCS5|AMOT_HUMAN@585		sp|Q9Y520|PRC2C_HUMAN@1045
sp|P49368|TCPG_HUMAN@138		sp|P13861|KAP2_HUMAN@280		sp|P51970|NDUA8_HUMAN@127
sp|Q9UKZ1|CNO11_HUMAN@495		sp|Q9NZI8|IF2B1_HUMAN@190		sp|Q6PD62|CTR9_HUMAN@471
sp|P48643|TCPE_HUMAN@170		sp|Q08170|SRSF4_HUMAN@419		sp|P61353|RL27_HUMAN@27
sp|P18124|RL7_HUMAN@19		sp|P05204|HMGN2_HUMAN@51		sp|Q13217|DNJC3_HUMAN@438
sp|P07686|HEXB_HUMAN@476		sp|O75691|UTP20_HUMAN@1855		sp|P04843|RPN1_HUMAN@187
sp|P00558|PGK1_HUMAN@361		sp|P06733|ENOA_HUMAN@81		sp|O60506|HNRPQ_HUMAN@363
sp|Q32MZ4|LRRF1_HUMAN@173		sp|P20537|PG042_VACCC@72		sp|Q9UK45|LSM7_HUMAN@21
sp|Q9UMS4|PRP19_HUMAN@179		sp|Q9UHV9|PFD2_HUMAN@94		sp|O43264|ZW10_HUMAN@130
sp|P61011|SRP54_HUMAN@398		sp|P56192|SYMC_HUMAN@726		sp|Q9HD67|MYO10_HUMAN@815
sp|P26885|FKBP2_HUMAN@36		sp|O95453|PARN_HUMAN@566		sp|Q9H8Y8|GORS2_HUMAN@56
sp|P09429|HMGB1_HUMAN@177		sp|P41252|SYIC_HUMAN@375		sp|Q7L2H7|EIF3M_HUMAN@213
sp|O60264|SMCA5_HUMAN@71		sp|Q8TAV0|FA76A_HUMAN@281		sp|O76021|RL1D1_HUMAN@331
sp|Q9Y3I0|RTCB_HUMAN@465		sp|Q9NTJ3|SMC4_HUMAN@1112		sp|Q96L92|SNX27_HUMAN@293
sp|P35637|FUS_HUMAN@334		sp|P42704|LPPRC_HUMAN@1347		sp|Q13451|FKBP5_HUMAN@252
sp|P82914|RT15_HUMAN@235		sp|P20700|LMNB1_HUMAN@145		sp|P0DME0|SETLP_HUMAN@82
sp|P09651|ROA1_HUMAN@52		sp|Q9UJZ1|STML2_HUMAN@250		sp|O95831|AIFM1_HUMAN@337
sp|O75151|PHF2_HUMAN@437		sp|P49321|NASP_HUMAN@417		sp|P13010|XRCC5_HUMAN@534
sp|P49368|TCPG_HUMAN@381		sp|P53618|COPB_HUMAN@712		sp|Q00839|HNRPU_HUMAN@688
sp|Q00839|HNRPU_HUMAN@186		sp|Q9H307|PININ_HUMAN@20		sp|P13639|EF2_HUMAN@314
sp|Q8WZ42|TITIN_HUMAN@10036		sp|Q9H910|JUPI2_HUMAN@90		sp|O00571|DDX3X_HUMAN@66
sp|P14324|FPPS_HUMAN@295		sp|P26038|MOES_HUMAN@64		sp|Q15942|ZYX_HUMAN@265
sp|Q9H444|CHM4B_HUMAN@14		sp|P47756|CAPZB_HUMAN@95		sp|Q9Y3F4|STRAP_HUMAN@164
sp|P16403|H12_HUMAN@136		sp|Q7L2E3|DHX30_HUMAN@760		sp|O43264|ZW10_HUMAN@777
sp|Q14807|KIF22_HUMAN@391		sp|P35579|MYH9_HUMAN@29		sp|Q5VZL5|ZMYM4_HUMAN@684
sp|Q9NX58|LYAR_HUMAN@173		sp|Q9HC35|EMAL4_HUMAN@493		sp|Q9UIA9|XPO7_HUMAN@176
sp|P31948|STIP1_HUMAN@301		sp|P61081|UBC12_HUMAN@92		sp|Q9Y3P9|RBGP1_HUMAN@455
sp|P35579|MYH9_HUMAN@1669		sp|O15020|SPTN2_HUMAN@291		sp|Q5TEC6|H37_HUMAN@24
sp|Q5VTE0|EF1A3_HUMAN@444		sp|Q09161|NCBP1_HUMAN@698		sp|Q99549|MPP8_HUMAN@452
sp|P10809|CH60_HUMAN@91		sp|O94826|TOM70_HUMAN@78		sp|P36871|PGM1_HUMAN@172
sp|Q96T17|MA7D2_HUMAN@79		sp|P61221|ABCE1_HUMAN@121		sp|O94906|PRP6_HUMAN@793
sp|Q13428|TCOF_HUMAN@655		sp|P62805|H4_HUMAN@80		sp|Q9H307|PININ_HUMAN@262
sp|P16403|H12_HUMAN@122		REV_sp|Q8NF91|SYNE1_HUMAN@6509		sp|P12270|TPR_HUMAN@177
sp|P12270|TPR_HUMAN@315		sp|Q15149|PLEC_HUMAN@3849		sp|P00505|AATM_HUMAN@122
sp|P11388|TOP2A_HUMAN@1422		sp|P09622|DLDH_HUMAN@166		sp|P46013|KI67_HUMAN@2178
sp|P11586|C1TC_HUMAN@825		sp|Q9Y5V0|ZN706_HUMAN@64		sp|P62917|RL8_HUMAN@60
sp|P42285|MTREX_HUMAN@761		sp|Q9BWU0|NADAP_HUMAN@426		sp|O75369|FLNB_HUMAN@1044
sp|P22033|MUTA_HUMAN@602		sp|Q06323|PSME1_HUMAN@70		sp|P46734|MP2K3_HUMAN@105
sp|P51398|RT29_HUMAN@321		sp|Q16891|MIC60_HUMAN@436		sp|O75683|SURF6_HUMAN@66
sp|O75521|ECI2_HUMAN@349		sp|O15050|TRNK1_HUMAN@394		sp|P12270|TPR_HUMAN@713
sp|Q9Y5B9|SP16H_HUMAN@777		sp|Q15181|IPYR_HUMAN@176		sp|Q14978|NOLC1_HUMAN@33
sp|P07814|SYEP_HUMAN@282		sp|P50213|IDH3A_HUMAN@343		sp|O15143|ARC1B_HUMAN@82
sp|P61289|PSME3_HUMAN@188		sp|Q9Y5T5|UBP16_HUMAN@339		sp|Q9ULA0|DNPEP_HUMAN@407
sp|Q6EEV6|SUMO4_HUMAN@33		sp|Q04637|IF4G1_HUMAN@1188		sp|P51553|IDH3G_HUMAN@129
sp|P09429|HMGB1_HUMAN@165		sp|P49792|RBP2_HUMAN@1711		sp|O75223|GGCT_HUMAN@50
sp|Q14966|ZN638_HUMAN@857		sp|Q9Y490|TLN1_HUMAN@2031		sp|P23381|SYWC_HUMAN@102
sp|Q16891|MIC60_HUMAN@119		sp|Q9Y2D5|PLAK2_HUMAN@17		sp|Q01780|EXOSX_HUMAN@591
sp|Q9UKV3|ACINU_HUMAN@831		sp|P62081|RS7_HUMAN@178		sp|P22234|PUR6_HUMAN@116
sp|Q15428|SF3A2_HUMAN@103		sp|Q8N4H5|TOM5_HUMAN@17		sp|P09874|PARP1_HUMAN@949
sp|P13639|EF2_HUMAN@438		sp|P02545|LMNA_HUMAN@32		sp|O00479|HMGN4_HUMAN@71
sp|O75643|U520_HUMAN@466		sp|P11021|BIP_HUMAN@547		sp|Q16822|PCKGM_HUMAN@489
sp|Q15233|NONO_HUMAN@68		sp|P07237|PDIA1_HUMAN@283		sp|P25705|ATPA_HUMAN@539
sp|Q15428|SF3A2_HUMAN@101		sp|O00203|AP3B1_HUMAN@72		sp|Q8IY81|SPB1_HUMAN@214
sp|Q00688|FKBP3_HUMAN@110		sp|O94925|GLSK_HUMAN@240		sp|O95202|LETM1_HUMAN@122
sp|Q9UKV3|ACINU_HUMAN@81		sp|Q14980|NUMA1_HUMAN@1699		sp|Q9NVI1|FANCI_HUMAN@849
sp|Q14203|DCTN1_HUMAN@725		sp|A0A8I5KQE6|RPSA2_HUMAN@89		sp|P00918|CAH2_HUMAN@153
sp|P62269|RS18_HUMAN@106		sp|P21333|FLNA_HUMAN@1491		sp|P22102|PUR2_HUMAN@697
sp|Q14739|LBR_HUMAN@64		sp|Q04637|IF4G1_HUMAN@1074		sp|O43395|PRPF3_HUMAN@171
sp|Q16143|SYUB_HUMAN@21		sp|O95478|NSA2_HUMAN@134		sp|P09543|CN37_HUMAN@73
sp|Q07021|C1QBP_HUMAN@100		sp|P78527|PRKDC_HUMAN@832		sp|P06753|TPM3_HUMAN@141
sp|Q9Y314|NOSIP_HUMAN@289		sp|P53990|IST1_HUMAN@309		sp|Q9UBL3|ASH2L_HUMAN@301
sp|Q92499|DDX1_HUMAN@281		sp|Q13131|AAPK1_HUMAN@40		sp|P11388|TOP2A_HUMAN@1385
sp|Q00341|VIGLN_HUMAN@389		sp|Q6Y1H2|HACD2_HUMAN@242		sp|P23526|SAHH_HUMAN@389
sp|O75347|TBCA_HUMAN@52		sp|Q13190|STX5_HUMAN@114		sp|P61019|RAB2A_HUMAN@56
sp|O14979|HNRDL_HUMAN@234		sp|P51572|BAP31_HUMAN@199		sp|Q04637|IF4G1_HUMAN@1059
sp|P42704|LPPRC_HUMAN@66		sp|P35637|FUS_HUMAN@316		sp|P61086|UBE2K_HUMAN@18
sp|O43491|E41L2_HUMAN@203		sp|Q9NYF8|BCLF1_HUMAN@303		sp|Q13642|FHL1_HUMAN@45
sp|P42704|LPPRC_HUMAN@909		sp|O60729|CC14B_HUMAN@377		REV_sp|Q13201|MMRN1_HUMAN@800
sp|Q15459|SF3A1_HUMAN@37		sp|P16403|H12_HUMAN@168		sp|P05091|ALDH2_HUMAN@159
sp|P04075|ALDOA_HUMAN@312		sp|Q14247|SRC8_HUMAN@346		sp|P52701|MSH6_HUMAN@519
sp|P30041|PRDX6_HUMAN@209		sp|P61254|RL26_HUMAN@51		sp|Q13547|HDAC1_HUMAN@89
sp|Q9UN86|G3BP2_HUMAN@210		sp|P05023|AT1A1_HUMAN@625		sp|O95749|GGPPS_HUMAN@30
sp|O43826|G6PT1_HUMAN@207		sp|P62081|RS7_HUMAN@147		sp|P14618|KPYM_HUMAN@125
sp|P30086|PEBP1_HUMAN@47		sp|Q9NYF8|BCLF1_HUMAN@506		sp|Q14690|RRP5_HUMAN@1524
sp|P46459|NSF_HUMAN@168		sp|Q08J23|NSUN2_HUMAN@650		sp|P43490|NAMPT_HUMAN@339
sp|P11021|BIP_HUMAN@185		sp|P62256|UBE2H_HUMAN@60		sp|P21127|CD11B_HUMAN@120
sp|Q00610|CLH1_HUMAN@1443		REV_sp|P12490|ENV_HV1N5@256		sp|O14715|RGPD8_HUMAN@910
sp|P37108|SRP14_HUMAN@43		sp|Q92945|FUBP2_HUMAN@122		sp|Q99536|VAT1_HUMAN@225
sp|Q9H9A6|LRC40_HUMAN@132		sp|Q9NTI5|PDS5B_HUMAN@1103		sp|Q8IY63|AMOL1_HUMAN@474
sp|Q9UQ80|PA2G4_HUMAN@344		sp|Q5JPE7|NOMO2_HUMAN@438		sp|P0DPI2|GAL3A_HUMAN@268
sp|O43402|EMC8_HUMAN@110		sp|Q7L576|CYFP1_HUMAN@189		sp|Q9BQG2|NUD12_HUMAN@77
sp|Q99832|TCPH_HUMAN@145		sp|P26599|PTBP1_HUMAN@465		sp|Q5VTE0|EF1A3_HUMAN@180
sp|P18669|PGAM1_HUMAN@241		sp|P18124|RL7_HUMAN@29		sp|Q9H4Z3|CAPAM_HUMAN@290
sp|P37837|TALDO_HUMAN@81		sp|O60832|DKC1_HUMAN@403		sp|Q9UJS0|S2513_HUMAN@669
sp|Q9C005|DPY30_HUMAN@40		sp|Q8WTT2|NOC3L_HUMAN@628		sp|Q8N3U4|STAG2_HUMAN@1076
sp|P17096|HMGA1_HUMAN@46		sp|P28676|GRAN_HUMAN@165		sp|Q9Y608|LRRF2_HUMAN@588
sp|P19338|NUCL_HUMAN@79		sp|P14866|HNRPL_HUMAN@538		sp|Q6UXN9|WDR82_HUMAN@181
sp|P61604|CH10_HUMAN@28		sp|Q92552|RT27_HUMAN@265		sp|P78527|PRKDC_HUMAN@4070
sp|Q9BQ69|MACD1_HUMAN@103		sp|P09972|ALDOC_HUMAN@140		sp|O94925|GLSK_HUMAN@311
REV_sp|Q9BW27|NUP85_HUMAN@587		sp|A0MZ66|SHOT1_HUMAN@171		sp|P05023|AT1A1_HUMAN@444
sp|P09661|RU2A_HUMAN@191		sp|P07900|HS90A_HUMAN@58		sp|Q9UNF1|MAGD2_HUMAN@494
sp|P49588|SYAC_HUMAN@231		sp|P53621|COPA_HUMAN@1082		sp|P12270|TPR_HUMAN@683
sp|P78347|GTF2I_HUMAN@488		sp|Q5VTE0|EF1A3_HUMAN@44		sp|Q5TFE4|NT5D1_HUMAN@373
sp|Q9UQ35|SRRM2_HUMAN@429		sp|Q15031|SYLM_HUMAN@720		sp|P22314|UBA1_HUMAN@635
sp|P04637|P53_HUMAN@101		sp|P50570|DYN2_HUMAN@562		sp|Q15029|U5S1_HUMAN@352
sp|Q9NVI1|FANCI_HUMAN@39		sp|Q9BTW9|TBCD_HUMAN@299		sp|P06748|NPM_HUMAN@150
sp|Q15532|SSXT_HUMAN@13		sp|P46940|IQGA1_HUMAN@997		sp|P46821|MAP1B_HUMAN@429
sp|P04406|G3P_HUMAN@61		sp|Q86UP2|KTN1_HUMAN@1197		sp|Q92900|RENT1_HUMAN@929
sp|P62424|RL7A_HUMAN@21		sp|P26038|MOES_HUMAN@143		sp|Q9NTZ6|RBM12_HUMAN@492
sp|P35580|MYH10_HUMAN@945		sp|Q9NR56|MBNL1_HUMAN@246		sp|P19404|NDUV2_HUMAN@75
sp|O00425|IF2B3_HUMAN@450		sp|P21333|FLNA_HUMAN@2563		sp|P13667|PDIA4_HUMAN@544
sp|P60228|EIF3E_HUMAN@82		sp|Q9UHD1|CHRD1_HUMAN@127		sp|P16949|STMN1_HUMAN@104
sp|Q9P2E9|RRBP1_HUMAN@1185		sp|P38646|GRP75_HUMAN@563		sp|P36578|RL4_HUMAN@239
sp|P27816|MAP4_HUMAN@809		sp|P12236|ADT3_HUMAN@63		sp|Q9Y237|PIN4_HUMAN@32
sp|Q9UKV3|ACINU_HUMAN@818		sp|Q7Z478|DHX29_HUMAN@93		sp|P11586|C1TC_HUMAN@297
sp|P62495|ERF1_HUMAN@83		sp|P22234|PUR6_HUMAN@17		sp|Q92616|GCN1_HUMAN@17
sp|O43670|ZN207_HUMAN@350		sp|P27816|MAP4_HUMAN@780		sp|A5YKK6|CNOT1_HUMAN@556
sp|O15347|HMGB3_HUMAN@30		sp|O15091|MRPP3_HUMAN@244		sp|P58876|H2B1D_HUMAN@6
sp|P50579|MAP2_HUMAN@281		sp|P08708|RS17_HUMAN@72		sp|Q13813|SPTN1_HUMAN@2052
sp|Q14839|CHD4_HUMAN@195		sp|P61106|RAB14_HUMAN@59		sp|P25054|APC_HUMAN@2081
sp|Q3SY69|AL1L2_HUMAN@897		sp|Q9BTV4|TMM43_HUMAN@99		sp|Q96ST3|SIN3A_HUMAN@1122
sp|Q9NP81|SYSM_HUMAN@110		sp|Q9Y678|COPG1_HUMAN@600		sp|Q6PJT7|ZC3HE_HUMAN@337
sp|O75391|SPAG7_HUMAN@67		sp|Q9NTJ3|SMC4_HUMAN@1037		sp|P10768|ESTD_HUMAN@200
sp|Q8TAT6|NPL4_HUMAN@62		sp|Q9Y6E2|5MP1_HUMAN@310		sp|P36542|ATPG_HUMAN@43
sp|P09874|PARP1_HUMAN@662		sp|Q9H6F5|CCD86_HUMAN@281		sp|Q14204|DYHC1_HUMAN@1177
sp|P26641|EF1G_HUMAN@227		sp|O00425|IF2B3_HUMAN@465		sp|Q9P0L0|VAPA_HUMAN@211
sp|Q9UKV3|ACINU_HUMAN@506		sp|Q6YN16|HSDL2_HUMAN@42		sp|P18124|RL7_HUMAN@40
sp|P49750|YLPM1_HUMAN@257		sp|Q9H7C9|AAMDC_HUMAN@55		sp|Q9HCS7|SYF1_HUMAN@794
sp|Q8IXK0|PHC2_HUMAN@702		sp|Q14204|DYHC1_HUMAN@67		sp|Q9H0H5|RGAP1_HUMAN@53
sp|Q9Y4L1|HYOU1_HUMAN@91		sp|Q8IWJ2|GCC2_HUMAN@583		sp|P11586|C1TC_HUMAN@595
sp|Q9NVI7|ATD3A_HUMAN@44		sp|O43242|PSMD3_HUMAN@455		sp|Q9Y223|GLCNE_HUMAN@433
sp|Q92917|GPKOW_HUMAN@61		sp|Q13098|CSN1_HUMAN@141		sp|Q9UHR4|BI2L1_HUMAN@106
sp|P06733|ENOA_HUMAN@228		sp|P49588|SYAC_HUMAN@81		sp|P14625|ENPL_HUMAN@410
sp|P26358|DNMT1_HUMAN@617		sp|Q92734|TFG_HUMAN@103		sp|Q9NW13|RBM28_HUMAN@478
sp|P31948|STIP1_HUMAN@364		sp|P13639|EF2_HUMAN@283		sp|Q9BXJ9|NAA15_HUMAN@556
sp|O75821|EIF3G_HUMAN@193		sp|P20042|IF2B_HUMAN@324		sp|P09661|RU2A_HUMAN@179
sp|Q5JTV8|TOIP1_HUMAN@334		sp|Q08170|SRSF4_HUMAN@23		sp|Q7Z5L9|I2BP2_HUMAN@236
sp|P30153|2AAA_HUMAN@33		sp|Q9BVC6|TM109_HUMAN@215		sp|Q15233|NONO_HUMAN@336
sp|O14787|TNPO2_HUMAN@817		sp|P08238|HS90B_HUMAN@551		sp|P14868|SYDC_HUMAN@451
sp|Q07065|CKAP4_HUMAN@294		sp|Q15370|ELOB_HUMAN@46		sp|Q15631|TSN_HUMAN@56
sp|P78527|PRKDC_HUMAN@3603		sp|P53367|ARFP1_HUMAN@107		sp|P34931|HS71L_HUMAN@27
sp|Q9Y4W2|LAS1L_HUMAN@135		sp|P62826|RAN_HUMAN@28		sp|Q9Y3C6|PPIL1_HUMAN@158
sp|Q8NBQ5|DHB11_HUMAN@105		sp|P49448|DHE4_HUMAN@363		sp|Q66K14|TBC9B_HUMAN@396
sp|P15311|EZRI_HUMAN@72		sp|O43399|TPD54_HUMAN@139		sp|Q14204|DYHC1_HUMAN@1526
sp|P13667|PDIA4_HUMAN@245		sp|Q5BKZ1|ZN326_HUMAN@260		sp|Q9H4M9|EHD1_HUMAN@483
sp|Q13428|TCOF_HUMAN@732		sp|P54886|P5CS_HUMAN@767		sp|P53701|CCHL_HUMAN@190
sp|P33176|KINH_HUMAN@539		sp|O95295|SNAPN_HUMAN@115		sp|P41240|CSK_HUMAN@393
sp|Q92900|RENT1_HUMAN@793		sp|P39023|RL3_HUMAN@373		sp|O60841|IF2P_HUMAN@226
sp|P23528|COF1_HUMAN@121		REV_sp|P10412|H14_HUMAN@7		sp|P22234|PUR6_HUMAN@235
sp|P18669|PGAM1_HUMAN@106		sp|Q00839|HNRPU_HUMAN@682		sp|Q9UBB4|ATX10_HUMAN@371
sp|P50914|RL14_HUMAN@209		sp|O95757|HS74L_HUMAN@671		sp|Q96MG7|NSE3_HUMAN@265
sp|Q9UQ88|CD11A_HUMAN@20		sp|P60174|TPIS_HUMAN@142		sp|Q14152|EIF3A_HUMAN@651
sp|Q96IX5|ATPMK_HUMAN@16		sp|Q09666|AHNK_HUMAN@4474		sp|P39023|RL3_HUMAN@286
sp|P60900|PSA6_HUMAN@181		sp|P31689|DNJA1_HUMAN@66		sp|Q96EL3|RM53_HUMAN@14
sp|P04406|G3P_HUMAN@254		sp|O75694|NU155_HUMAN@740		sp|O75643|U520_HUMAN@285
REV_sp|Q15772|SPEG_HUMAN@677		sp|Q9BUR5|MIC26_HUMAN@187		sp|O95347|SMC2_HUMAN@837
sp|Q15029|U5S1_HUMAN@713		sp|P09012|SNRPA_HUMAN@96		sp|P11387|TOP1_HUMAN@540
sp|P19338|NUCL_HUMAN@62		REV_sp|Q5TZA2|CROCC_HUMAN@377		sp|P15259|PGAM2_HUMAN@100
sp|P49588|SYAC_HUMAN@762		sp|P61088|UBE2N_HUMAN@82		sp|P43243|MATR3_HUMAN@716
sp|P50570|DYN2_HUMAN@113		sp|P02545|LMNA_HUMAN@123		sp|P29966|MARCS_HUMAN@105
sp|Q9P2E9|RRBP1_HUMAN@501		sp|Q16881|TRXR1_HUMAN@458		sp|Q86U44|MTA70_HUMAN@215
sp|P48637|GSHB_HUMAN@186		sp|Q13442|HAP28_HUMAN@105		sp|Q53S08|RAB6D_HUMAN@133
sp|Q15005|SPCS2_HUMAN@191		sp|P05455|LA_HUMAN@360		sp|P43897|EFTS_HUMAN@52
sp|P21333|FLNA_HUMAN@994		sp|P11586|C1TC_HUMAN@251		sp|Q92878|RAD50_HUMAN@6
sp|P02545|LMNA_HUMAN@311		sp|Q9Y383|LC7L2_HUMAN@122		sp|Q53GQ0|DHB12_HUMAN@95
sp|P19338|NUCL_HUMAN@424		sp|P18124|RL7_HUMAN@53		sp|Q14697|GANAB_HUMAN@908
sp|P23528|COF1_HUMAN@19		sp|P41252|SYIC_HUMAN@1042		sp|Q9Y696|CLIC4_HUMAN@62
sp|Q6P1J9|CDC73_HUMAN@209		sp|P40227|TCPZ_HUMAN@381		sp|Q9Y2W1|TR150_HUMAN@481
sp|O95292|VAPB_HUMAN@45		sp|O14818|PSA7_HUMAN@218		sp|Q13257|MD2L1_HUMAN@111
sp|O75832|PSD10_HUMAN@30		sp|O76021|RL1D1_HUMAN@461		sp|Q15061|WDR43_HUMAN@491
sp|Q9BQG0|MBB1A_HUMAN@259		sp|Q9ULC3|RAB23_HUMAN@141		sp|P62753|RS6_HUMAN@30
sp|Q5BKZ1|ZN326_HUMAN@269		sp|Q8WY22|BRI3B_HUMAN@229		sp|Q9C0C2|TB182_HUMAN@173
sp|P08238|HS90B_HUMAN@538		sp|Q8TEA8|DTD1_HUMAN@165		sp|Q9BY77|PDIP3_HUMAN@265
sp|Q13428|TCOF_HUMAN@1238		sp|Q92522|H1X_HUMAN@145		sp|Q9UQE7|SMC3_HUMAN@612
sp|P12270|TPR_HUMAN@1603		sp|P04406|G3P_HUMAN@139		sp|Q9HC07|TM165_HUMAN@227
sp|P36578|RL4_HUMAN@374		sp|Q13561|DCTN2_HUMAN@119		sp|Q15417|CNN3_HUMAN@19
sp|P55072|TERA_HUMAN@614		sp|Q8TAF3|WDR48_HUMAN@214		sp|Q68CZ1|FTM_HUMAN@511
sp|O15213|WDR46_HUMAN@72		sp|O95613|PCNT_HUMAN@2795		sp|P42285|MTREX_HUMAN@646
sp|O76094|SRP72_HUMAN@475		sp|Q07065|CKAP4_HUMAN@301		sp|O94888|UBXN7_HUMAN@84
sp|O15372|EIF3H_HUMAN@5		sp|P40939|ECHA_HUMAN@569		sp|Q8N3U4|STAG2_HUMAN@53
sp|P35580|MYH10_HUMAN@1676		sp|P57740|NU107_HUMAN@698		sp|Q9UQ35|SRRM2_HUMAN@491
sp|P14625|ENPL_HUMAN@95		sp|O76021|RL1D1_HUMAN@109		sp|Q8NI27|THOC2_HUMAN@415
sp|P12270|TPR_HUMAN@899		sp|P50991|TCPD_HUMAN@531		sp|Q00839|HNRPU_HUMAN@343
sp|P32322|P5CR1_HUMAN@289		sp|Q16891|MIC60_HUMAN@269		sp|P46087|NOP2_HUMAN@772
REV_sp|P02549|SPTA1_HUMAN@818		REV_sp|Q8NFC6|BD1L1_HUMAN@2333		sp|Q9H8M7|MINY3_HUMAN@155
sp|Q9UBM7|DHCR7_HUMAN@13		sp|Q53EL6|PDCD4_HUMAN@297		sp|Q9HB71|CYBP_HUMAN@178
sp|O43660|PLRG1_HUMAN@484		sp|Q9P2J5|SYLC_HUMAN@914		sp|O14776|TCRG1_HUMAN@700
sp|Q9UHX1|PUF60_HUMAN@265		sp|P26639|SYTC_HUMAN@279		sp|O76094|SRP72_HUMAN@464
sp|P62316|SMD2_HUMAN@88		sp|O00571|DDX3X_HUMAN@418		sp|Q14203|DCTN1_HUMAN@558
sp|P38919|IF4A3_HUMAN@70		sp|Q5JTH9|RRP12_HUMAN@789		sp|Q8WUA2|PPIL4_HUMAN@352
sp|P62495|ERF1_HUMAN@284		sp|Q9Y3D6|FIS1_HUMAN@92		sp|P46060|RAGP1_HUMAN@28
sp|Q8IWA0|WDR75_HUMAN@676		sp|Q9Y265|RUVB1_HUMAN@281		sp|P14854|CX6B1_HUMAN@85
sp|Q9UGM6|SYWM_HUMAN@234		sp|Q96I25|SPF45_HUMAN@276		sp|Q92947|GCDH_HUMAN@253
sp|Q3ZCQ8|TIM50_HUMAN@65		sp|A6NIZ1|RP1BL_HUMAN@174		sp|Q8IWS0|PHF6_HUMAN@273
sp|Q03252|LMNB2_HUMAN@285		sp|Q13613|MTMR1_HUMAN@464		sp|Q1KMD3|HNRL2_HUMAN@474
sp|P0DMV9|HS71B_HUMAN@348		sp|Q9Y4W6|AFG32_HUMAN@481		sp|Q9UMY1|NOL7_HUMAN@210
sp|P04012|VL1_HPV11@493		sp|P36957|ODO2_HUMAN@203		sp|Q99714|HCD2_HUMAN@104
sp|Q8N1F7|NUP93_HUMAN@637		sp|P53041|PPP5_HUMAN@124		sp|P19338|NUCL_HUMAN@398
sp|Q6FI81|CPIN1_HUMAN@187		sp|O95831|AIFM1_HUMAN@295		sp|P46778|RL21_HUMAN@21
sp|P07197|NFM_HUMAN@691		REV_sp|Q05639|EF1A2_HUMAN@7		sp|P05960|POL_HV1C4@388
sp|Q14697|GANAB_HUMAN@899		sp|P62424|RL7A_HUMAN@48		sp|Q7Z6E9|RBBP6_HUMAN@1567
sp|P24752|THIL_HUMAN@174		sp|O75832|PSD10_HUMAN@221		sp|Q96I99|SUCB2_HUMAN@403
sp|P82970|HMGN5_HUMAN@95		sp|Q7L014|DDX46_HUMAN@577		sp|Q15070|OXA1L_HUMAN@343
sp|Q9NWY4|HPF1_HUMAN@191		sp|O14776|TCRG1_HUMAN@1016		sp|Q8N1F7|NUP93_HUMAN@243
sp|Q99661|KIF2C_HUMAN@90		sp|Q5VTE0|EF1A3_HUMAN@215		sp|P07305|H10_HUMAN@121
sp|Q00688|FKBP3_HUMAN@86		sp|O00479|HMGN4_HUMAN@31		sp|O15347|HMGB3_HUMAN@88
sp|P04844|RPN2_HUMAN@401		sp|Q53S33|BOLA3_HUMAN@41		sp|Q8N6M3|FITM2_HUMAN@52
sp|O15212|PFD6_HUMAN@122		sp|Q02878|RL6_HUMAN@19		sp|Q9Y5J1|UTP18_HUMAN@41
sp|P04637|P53_HUMAN@319		sp|P34932|HSP74_HUMAN@686		sp|Q68CP9|ARID2_HUMAN@15
sp|Q8N4H5|TOM5_HUMAN@10		sp|Q91B85|POLG_ALKV@3		sp|Q9NYF8|BCLF1_HUMAN@182
sp|P38919|IF4A3_HUMAN@374		sp|Q15041|AR6P1_HUMAN@96		sp|Q13573|SNW1_HUMAN@81
sp|Q8TCT9|HM13_HUMAN@361		sp|Q9NR50|EI2BG_HUMAN@367		sp|Q02878|RL6_HUMAN@77
sp|P78347|GTF2I_HUMAN@326		sp|P17844|DDX5_HUMAN@470		sp|Q14566|MCM6_HUMAN@326
sp|P27824|CALX_HUMAN@233		sp|Q9P0M6|H2AW_HUMAN@226		sp|P62753|RS6_HUMAN@164
sp|Q9P0K7|RAI14_HUMAN@42		sp|O00487|PSDE_HUMAN@154		sp|P30050|RL12_HUMAN@41
sp|Q9BQG0|MBB1A_HUMAN@1155		sp|P62316|SMD2_HUMAN@86		sp|Q96SB8|SMC6_HUMAN@331
sp|O43768|ENSA_HUMAN@80		sp|Q92925|SMRD2_HUMAN@514		sp|O00469|PLOD2_HUMAN@131
sp|O75131|CPNE3_HUMAN@533		sp|P50990|TCPQ_HUMAN@539		sp|Q6P2Q9|PRP8_HUMAN@29
sp|Q9Y2W1|TR150_HUMAN@811		sp|O60397|COX7S_HUMAN@31		sp|Q9NYF8|BCLF1_HUMAN@332
sp|Q13045|FLII_HUMAN@631		sp|Q9NUJ1|ABHDA_HUMAN@69		sp|P35249|RFC4_HUMAN@205
sp|P35613|BASI_HUMAN@179		sp|P07900|HS90A_HUMAN@74		sp|Q14257|RCN2_HUMAN@71
sp|P36578|RL4_HUMAN@182		sp|P30041|PRDX6_HUMAN@63		sp|P09874|PARP1_HUMAN@253
sp|Q9H3N1|TMX1_HUMAN@259		sp|Q9P0L0|VAPA_HUMAN@125		sp|Q07866|KLC1_HUMAN@29
sp|P54727|RD23B_HUMAN@36		sp|Q13247|SRSF6_HUMAN@311		sp|Q9BZZ5|API5_HUMAN@411
sp|P0C6X5|R1AB_CVHNL@2465		sp|P35659|DEK_HUMAN@326		sp|Q13123|RED_HUMAN@137
sp|P07237|PDIA1_HUMAN@328		sp|Q99707|METH_HUMAN@681		REV_sp|Q01538|MYT1_HUMAN@602
sp|P10412|H14_HUMAN@159		sp|P55884|EIF3B_HUMAN@463		sp|P62750|RL23A_HUMAN@134
sp|Q8WUM4|PDC6I_HUMAN@339		sp|Q96EY8|MMAB_HUMAN@51		sp|Q9NVH1|DJC11_HUMAN@476
sp|Q06830|PRDX1_HUMAN@35		sp|Q9HC35|EMAL4_HUMAN@170		sp|P02786|TFR1_HUMAN@665
sp|P41250|GARS_HUMAN@733		sp|Q14204|DYHC1_HUMAN@2286		sp|Q9HC38|GLOD4_HUMAN@310
sp|Q9Y5K6|CD2AP_HUMAN@351		sp|P09874|PARP1_HUMAN@400		sp|Q92552|RT27_HUMAN@361
sp|P62937|PPIA_HUMAN@44		sp|Q86Y39|NDUAB_HUMAN@138		sp|Q13625|ASPP2_HUMAN@275
sp|Q5VTE0|EF1A3_HUMAN@179		sp|Q6NUK1|SCMC1_HUMAN@285		sp|Q68CP9|ARID2_HUMAN@1067
sp|Q96A49|SYAP1_HUMAN@84		sp|P35749|MYH11_HUMAN@78		sp|Q5IS54|CASP3_PANTR@82
sp|P17066|HSP76_HUMAN@502		sp|P60660|MYL6_HUMAN@98		sp|Q8WVM8|SCFD1_HUMAN@126
sp|Q9Y2W1|TR150_HUMAN@346		sp|P58546|MTPN_HUMAN@90		sp|Q96ST3|SIN3A_HUMAN@337
sp|P24534|EF1B_HUMAN@129		sp|P62829|RL23_HUMAN@13		sp|P12270|TPR_HUMAN@1637
sp|Q9NR30|DDX21_HUMAN@600		sp|O94776|MTA2_HUMAN@32		sp|Q93096|TP4A1_HUMAN@151
sp|O76094|SRP72_HUMAN@648		sp|Q07021|C1QBP_HUMAN@98		sp|O75934|SPF27_HUMAN@218
sp|Q9NTJ3|SMC4_HUMAN@429		sp|Q9UQ35|SRRM2_HUMAN@285		sp|P60763|RAC3_HUMAN@166
sp|P48634|PRC2A_HUMAN@35		sp|Q00059|TFAM_HUMAN@118		sp|Q8N335|GPD1L_HUMAN@51
sp|O15372|EIF3H_HUMAN@180		sp|P62753|RS6_HUMAN@119		sp|P55060|XPO2_HUMAN@440
sp|Q86UE4|LYRIC_HUMAN@510		sp|Q9NVT9|ARMC1_HUMAN@130		sp|O15347|HMGB3_HUMAN@7
sp|P36543|VATE1_HUMAN@138		sp|P52943|CRIP2_HUMAN@102		sp|P51610|HCFC1_HUMAN@1217
sp|Q969Z0|FAKD4_HUMAN@163		sp|Q8WX93|PALLD_HUMAN@1029		sp|P15529|MCP_HUMAN@375
sp|Q16181|SEPT7_HUMAN@326		sp|Q14571|ITPR2_HUMAN@90		sp|Q02539|H11_HUMAN@66
sp|Q14247|SRC8_HUMAN@144		sp|Q13310|PABP4_HUMAN@157		sp|P26583|HMGB2_HUMAN@55
sp|Q9Y5B9|SP16H_HUMAN@490		sp|Q02543|RL18A_HUMAN@11		sp|Q14566|MCM6_HUMAN@486
sp|P50395|GDIB_HUMAN@57		sp|Q14203|DCTN1_HUMAN@962		sp|Q92890|UFD1_HUMAN@175
sp|P23497|SP100_HUMAN@764		sp|P42166|LAP2A_HUMAN@101		sp|Q9HCC0|MCCB_HUMAN@506
sp|P40939|ECHA_HUMAN@390		sp|P13010|XRCC5_HUMAN@195		sp|Q96DG6|CMBL_HUMAN@105
sp|O00264|PGRC1_HUMAN@102		sp|Q02878|RL6_HUMAN@239		sp|Q96GQ7|DDX27_HUMAN@602
sp|Q01085|TIAR_HUMAN@181		sp|Q9NU22|MDN1_HUMAN@1344		sp|Q9NVA2|SEP11_HUMAN@384
sp|P18077|RL35A_HUMAN@63		sp|P48047|ATPO_HUMAN@84		sp|P29401|TKT_HUMAN@260
sp|Q9C005|DPY30_HUMAN@35		sp|P10412|H14_HUMAN@17		sp|P78316|NOP14_HUMAN@759
sp|P62491|RB11A_HUMAN@179		sp|Q14566|MCM6_HUMAN@205		sp|P21333|FLNA_HUMAN@2024
sp|P08559|ODPA_HUMAN@63		sp|Q7L592|NDUF7_HUMAN@375		sp|P41091|IF2G_HUMAN@196
sp|P27816|MAP4_HUMAN@968		sp|Q8WVY7|UBCP1_HUMAN@282		sp|P31948|STIP1_HUMAN@388
sp|P63261|ACTG_HUMAN@315		sp|P08238|HS90B_HUMAN@275		sp|O95197|RTN3_HUMAN@1013
sp|P19338|NUCL_HUMAN@132		sp|P14635|CCNB1_HUMAN@81		sp|Q6DKK2|TTC19_HUMAN@104
sp|Q9BWU0|NADAP_HUMAN@525		sp|Q92522|H1X_HUMAN@146		sp|O75934|SPF27_HUMAN@210
sp|O76021|RL1D1_HUMAN@408		sp|O94906|PRP6_HUMAN@455		sp|P51659|DHB4_HUMAN@68
sp|Q00341|VIGLN_HUMAN@991		sp|Q9NVU0|RPC5_HUMAN@465		sp|P60520|GBRL2_HUMAN@46
sp|Q00688|FKBP3_HUMAN@48		sp|O14929|HAT1_HUMAN@15		sp|P35251|RFC1_HUMAN@645
sp|Q9H223|EHD4_HUMAN@35		sp|Q9BVC6|TM109_HUMAN@46		sp|Q9UNZ2|NSF1C_HUMAN@251
sp|Q8IX12|CCAR1_HUMAN@146		sp|Q16763|UBE2S_HUMAN@63		sp|P49591|SYSC_HUMAN@12
sp|Q06413|MEF2C_HUMAN@463		sp|P47914|RL29_HUMAN@134		REV_sp|P37800|L_TOSV@1401
sp|Q9UNH7|SNX6_HUMAN@276		sp|P27797|CALR_HUMAN@276		sp|Q14203|DCTN1_HUMAN@1151
sp|P60900|PSA6_HUMAN@171		sp|Q16891|MIC60_HUMAN@282		sp|P52294|IMA5_HUMAN@105
sp|Q9Y224|RTRAF_HUMAN@115		sp|P62829|RL23_HUMAN@75		sp|P42224|STAT1_HUMAN@410
sp|P35579|MYH9_HUMAN@1716		sp|P36578|RL4_HUMAN@172		sp|P31942|HNRH3_HUMAN@255
sp|P49773|HINT1_HUMAN@30		sp|P78411|IRX5_HUMAN@331		sp|P49642|PRI1_HUMAN@193
sp|Q9P2J5|SYLC_HUMAN@283		sp|Q01658|NC2B_HUMAN@128		sp|Q9ULV4|COR1C_HUMAN@407
sp|Q13813|SPTN1_HUMAN@1419		sp|Q9NVI1|FANCI_HUMAN@397		sp|O95831|AIFM1_HUMAN@278
sp|Q9Y5B9|SP16H_HUMAN@786		sp|Q5TBA9|FRY_HUMAN@1088		sp|Q7Z4W1|DCXR_HUMAN@17
sp|Q96F86|EDC3_HUMAN@106		sp|O95831|AIFM1_HUMAN@244		sp|Q14683|SMC1A_HUMAN@13
sp|Q9H583|HEAT1_HUMAN@1533		sp|P78527|PRKDC_HUMAN@3884		sp|Q9NQ48|LZTL1_HUMAN@264
sp|Q9H2P0|ADNP_HUMAN@153		sp|P31942|HNRH3_HUMAN@97		sp|O43237|DC1L2_HUMAN@372
sp|Q9UNL2|SSRG_HUMAN@98		sp|P13639|EF2_HUMAN@605		sp|O43615|TIM44_HUMAN@312
sp|Q00688|FKBP3_HUMAN@121		sp|Q13151|ROA0_HUMAN@96		sp|Q14684|RRP1B_HUMAN@644
sp|P31949|S10AB_HUMAN@55		sp|Q99873|ANM1_HUMAN@128		sp|P48643|TCPE_HUMAN@223
sp|Q9Y2W1|TR150_HUMAN@333		sp|Q15459|SF3A1_HUMAN@533		sp|O94776|MTA2_HUMAN@639
sp|P21333|FLNA_HUMAN@691		sp|P25787|PSA2_HUMAN@171		sp|P54577|SYYC_HUMAN@334
sp|Q16777|H2A2C_HUMAN@125		sp|O15155|BET1_HUMAN@42		sp|Q9NTZ6|RBM12_HUMAN@636
REV_sp|Q9UPS6|SET1B_HUMAN@1842		sp|P63104|1433Z_HUMAN@75		sp|Q709F0|ACD11_HUMAN@92
sp|Q8N9N7|LRC57_HUMAN@235		sp|P49321|NASP_HUMAN@262		sp|P46939|UTRN_HUMAN@1186
sp|P04075|ALDOA_HUMAN@42		sp|Q08170|SRSF4_HUMAN@264		sp|Q9H0X9|OSBL5_HUMAN@446
sp|Q9NP79|VTA1_HUMAN@71		sp|Q9Y230|RUVB2_HUMAN@365		sp|O43395|PRPF3_HUMAN@270
REV_sp|A6NHR9|SMHD1_HUMAN@1387		sp|Q14690|RRP5_HUMAN@1855		sp|Q9NR30|DDX21_HUMAN@559
REV_sp|Q8N9Z9|LMTD1_HUMAN@87		sp|P37837|TALDO_HUMAN@286		sp|Q96AC1|FERM2_HUMAN@390
sp|O00330|ODPX_HUMAN@155		sp|O94906|PRP6_HUMAN@755		sp|O60885|BRD4_HUMAN@624
sp|Q3LXA3|TKFC_HUMAN@525		sp|P33778|H2B1B_HUMAN@109		sp|Q99832|TCPH_HUMAN@217
sp|P07305|H10_HUMAN@137		sp|P27816|MAP4_HUMAN@387		sp|P35573|GDE_HUMAN@1314
sp|P63241|IF5A1_HUMAN@47		sp|Q13895|BYST_HUMAN@242		sp|Q15800|MSMO1_HUMAN@167
sp|O94776|MTA2_HUMAN@341		sp|Q14677|EPN4_HUMAN@218		sp|P83731|RL24_HUMAN@147
sp|P49790|NU153_HUMAN@705		sp|Q14978|NOLC1_HUMAN@663		sp|Q8IY67|RAVR1_HUMAN@434
sp|O43809|CPSF5_HUMAN@23		sp|Q6YN16|HSDL2_HUMAN@318		sp|Q9UP83|COG5_HUMAN@151
sp|O00567|NOP56_HUMAN@564		sp|Q01518|CAP1_HUMAN@327		sp|Q8WYP5|ELYS_HUMAN@505
sp|Q9Y4L1|HYOU1_HUMAN@94		sp|Q8WUD4|CCD12_HUMAN@87		sp|P08621|RU17_HUMAN@130
sp|P07814|SYEP_HUMAN@725		sp|Q8WVM0|TFB1M_HUMAN@46		sp|P16615|AT2A2_HUMAN@683
sp|P05204|HMGN2_HUMAN@40		sp|P55145|MANF_HUMAN@133		sp|Q9NZL9|MAT2B_HUMAN@209
sp|P06748|NPM_HUMAN@229		sp|Q9BSD7|NTPCR_HUMAN@171		sp|Q12906|ILF3_HUMAN@342
sp|O43264|ZW10_HUMAN@597		sp|C9JLW8|MCRI1_HUMAN@76		sp|Q9Y237|PIN4_HUMAN@75
sp|P36578|RL4_HUMAN@20		sp|P61927|RL37_HUMAN@10		sp|P15924|DESP_HUMAN@1288
sp|P29401|TKT_HUMAN@16		sp|Q9P289|STK26_HUMAN@40		sp|Q14152|EIF3A_HUMAN@916
sp|Q96A08|H2B1A_HUMAN@13		sp|Q9UNS1|TIM_HUMAN@1085		sp|O14776|TCRG1_HUMAN@1024
sp|Q96CT7|CC124_HUMAN@11		sp|P62906|RL10A_HUMAN@130		sp|P62906|RL10A_HUMAN@152
sp|Q00610|CLH1_HUMAN@1441		sp|Q7L2H7|EIF3M_HUMAN@363		sp|P49411|EFTU_HUMAN@421
sp|P63104|1433Z_HUMAN@9		sp|Q9UHN6|CEIP2_HUMAN@1262		sp|P60842|IF4A1_HUMAN@369
sp|Q13428|TCOF_HUMAN@528		sp|O43707|ACTN4_HUMAN@592		sp|P16333|NCK1_HUMAN@129
sp|P12270|TPR_HUMAN@1081		sp|Q12769|NU160_HUMAN@965		sp|Q9BT78|CSN4_HUMAN@137
sp|P61289|PSME3_HUMAN@12		sp|P49915|GUAA_HUMAN@670		sp|O43290|SNUT1_HUMAN@530
sp|P46013|KI67_HUMAN@3177		sp|Q15651|HMGN3_HUMAN@33		sp|Q9NQR4|NIT2_HUMAN@68
sp|Q13642|FHL1_HUMAN@17		sp|Q07955|SRSF1_HUMAN@179		sp|Q5T655|CFA58_HUMAN@692
sp|P35580|MYH10_HUMAN@1638		sp|P16104|H2AX_HUMAN@135		sp|Q99798|ACON_HUMAN@520
sp|Q96PK6|RBM14_HUMAN@138		REV_sp|Q9H2G2|SLK_HUMAN@309		sp|Q92499|DDX1_HUMAN@82
sp|P07197|NFM_HUMAN@271		sp|Q8NC51|SERB1_HUMAN@122		sp|Q96C86|DCPS_HUMAN@128
sp|P55039|DRG2_HUMAN@46		sp|Q9Y490|TLN1_HUMAN@2043		sp|P55084|ECHB_HUMAN@188
sp|P45974|UBP5_HUMAN@793		sp|Q92878|RAD50_HUMAN@187		sp|P27824|CALX_HUMAN@217
sp|Q13435|SF3B2_HUMAN@877		sp|Q9Y3A5|SBDS_HUMAN@231		sp|Q86WJ1|CHD1L_HUMAN@272
sp|P10412|H14_HUMAN@129		sp|Q9H6R4|NOL6_HUMAN@47		sp|P62258|1433E_HUMAN@153
sp|Q9UBE0|SAE1_HUMAN@198		sp|P07741|APT_HUMAN@114		sp|P52756|RBM5_HUMAN@542
sp|Q00059|TFAM_HUMAN@174		sp|Q99538|LGMN_HUMAN@125		sp|P11388|TOP2A_HUMAN@1159
sp|Q14676|MDC1_HUMAN@1402		sp|Q06830|PRDX1_HUMAN@16		sp|Q9UNF1|MAGD2_HUMAN@414
sp|O94906|PRP6_HUMAN@667		sp|Q9P2D1|CHD7_HUMAN@678		sp|Q9NW68|BSDC1_HUMAN@156
sp|P62753|RS6_HUMAN@143		sp|P07814|SYEP_HUMAN@593		sp|Q07065|CKAP4_HUMAN@405
REV_sp|Q6NSZ9|ZSC25_HUMAN@417		sp|P29692|EF1D_HUMAN@185		sp|Q16629|SRSF7_HUMAN@24
sp|Q92621|NU205_HUMAN@69		sp|Q562R1|ACTBL_HUMAN@329		sp|Q9Y4L1|HYOU1_HUMAN@991
sp|P09874|PARP1_HUMAN@203		sp|P09874|PARP1_HUMAN@209		sp|P21281|VATB2_HUMAN@108
sp|P09429|HMGB1_HUMAN@146		sp|P26640|SYVC_HUMAN@645		sp|Q92733|PRCC_HUMAN@193
sp|Q5IS43|LIS1_PANTR@76		sp|P16989|YBOX3_HUMAN@90		sp|Q9Y3T9|NOC2L_HUMAN@516
sp|P49736|MCM2_HUMAN@469		sp|P18621|RL17_HUMAN@159		sp|P49902|5NTC_HUMAN@231
sp|Q13423|NNTM_HUMAN@117		sp|P61289|PSME3_HUMAN@121		sp|Q9UKV3|ACINU_HUMAN@970
sp|Q15388|TOM20_HUMAN@35		sp|Q9BQG0|MBB1A_HUMAN@988		sp|Q9UNZ2|NSF1C_HUMAN@113
REV_sp|Q13023|AKAP6_HUMAN@1462		sp|O00255|MEN1_HUMAN@8		sp|Q96IK1|BOD1_HUMAN@161
sp|P62979|RS27A_HUMAN@113		sp|Q7Z3K3|POGZ_HUMAN@1053		sp|P27144|KAD4_HUMAN@175
sp|Q9NY93|DDX56_HUMAN@73		sp|Q9UNP9|PPIE_HUMAN@218		sp|Q9H3K2|GHITM_HUMAN@76
sp|P08670|VIME_HUMAN@120		sp|Q96CT7|CC124_HUMAN@121		sp|Q5SSJ5|HP1B3_HUMAN@473
sp|Q8WXH0|SYNE2_HUMAN@3063		sp|Q8N668|COMD1_HUMAN@82		sp|Q06323|PSME1_HUMAN@187
sp|Q8N1F7|NUP93_HUMAN@660		sp|P06748|NPM_HUMAN@202		sp|P08195|4F2_HUMAN@147
sp|Q14978|NOLC1_HUMAN@407		sp|Q15436|SC23A_HUMAN@318		sp|A6NMY6|AXA2L_HUMAN@227
sp|P05114|HMGN1_HUMAN@71		sp|P35579|MYH9_HUMAN@1274		sp|Q01082|SPTB2_HUMAN@1913
sp|Q99590|SCAFB_HUMAN@1354		sp|P78527|PRKDC_HUMAN@1141		sp|Q96EE3|SEH1_HUMAN@255
sp|P20674|COX5A_HUMAN@72		sp|Q8IY67|RAVR1_HUMAN@190		sp|Q8IX12|CCAR1_HUMAN@738
sp|P30519|HMOX2_HUMAN@38		sp|P09543|CN37_HUMAN@217		sp|Q5VTE0|EF1A3_HUMAN@219
sp|P14625|ENPL_HUMAN@168		sp|Q7Z4G4|TRM11_HUMAN@124		sp|Q9Y679|AUP1_HUMAN@250
sp|Q9UBT2|SAE2_HUMAN@617		sp|P09874|PARP1_HUMAN@653		sp|Q8IY95|TM192_HUMAN@199
sp|P62701|RS4X_HUMAN@75		sp|P37802|TAGL2_HUMAN@153		sp|O95202|LETM1_HUMAN@133
sp|Q6DKI1|RL7L_HUMAN@41		REV_sp|O95347|SMC2_HUMAN@1005		sp|Q9Y5X3|SNX5_HUMAN@123
sp|O95232|LC7L3_HUMAN@231		sp|P13667|PDIA4_HUMAN@521		sp|Q8IYU8|MICU2_HUMAN@355
sp|P17844|DDX5_HUMAN@32		sp|Q14978|NOLC1_HUMAN@246		sp|Q8NI36|WDR36_HUMAN@839
REV_sp|Q9HCK8|CHD8_HUMAN@1202		sp|Q9Y265|RUVB1_HUMAN@445		sp|P20290|BTF3_HUMAN@177
sp|Q14152|EIF3A_HUMAN@645		sp|P46087|NOP2_HUMAN@638		sp|Q8WVM8|SCFD1_HUMAN@572
sp|P35579|MYH9_HUMAN@1445		sp|Q9NYF8|BCLF1_HUMAN@462		sp|Q8WXX0|DYH7_HUMAN@2571
sp|P62913|RL11_HUMAN@178		sp|Q7L014|DDX46_HUMAN@952		sp|P11387|TOP1_HUMAN@391
sp|Q9H078|CLPB_HUMAN@134		sp|P61353|RL27_HUMAN@128		sp|Q9UBE0|SAE1_HUMAN@208
sp|Q9UHV9|PFD2_HUMAN@84		sp|Q8NC51|SERB1_HUMAN@68		sp|P35579|MYH9_HUMAN@1802
sp|P17844|DDX5_HUMAN@340		sp|P41252|SYIC_HUMAN@382		sp|P35579|MYH9_HUMAN@14
sp|Q96KK5|H2A1H_HUMAN@100		sp|O75367|H2AY_HUMAN@248		sp|P27708|PYR1_HUMAN@747
sp|P29401|TKT_HUMAN@232		sp|P05455|LA_HUMAN@37		sp|Q14739|LBR_HUMAN@594
sp|Q9UJU6|DBNL_HUMAN@164		sp|Q9BXW7|HDHD5_HUMAN@132		sp|P29966|MARCS_HUMAN@30
sp|P62266|RS23_HUMAN@29		sp|Q9UJZ1|STML2_HUMAN@222		sp|Q13011|ECH1_HUMAN@321
sp|Q9UNE7|CHIP_HUMAN@30		sp|P15880|RS2_HUMAN@58		sp|Q9H0A0|NAT10_HUMAN@689
sp|P18206|VINC_HUMAN@476		sp|O15228|GNPAT_HUMAN@643		sp|Q13428|TCOF_HUMAN@253
sp|P52701|MSH6_HUMAN@22		sp|Q7L014|DDX46_HUMAN@776		sp|Q9Y490|TLN1_HUMAN@922
sp|Q8IXM2|BAP18_HUMAN@132		sp|Q9Y6E2|5MP1_HUMAN@391		sp|P35241|RADI_HUMAN@526
sp|P10599|THIO_HUMAN@94		sp|P16949|STMN1_HUMAN@70		sp|P46940|IQGA1_HUMAN@806
sp|P49591|SYSC_HUMAN@55		sp|Q14839|CHD4_HUMAN@711		sp|P09874|PARP1_HUMAN@346
sp|P55265|DSRAD_HUMAN@781		sp|Q9NPA8|ENY2_HUMAN@19		sp|Q9BY44|EIF2A_HUMAN@127
sp|P43243|MATR3_HUMAN@588		sp|O15144|ARPC2_HUMAN@186		sp|Q9NVA2|SEP11_HUMAN@190
sp|Q9BZF9|UACA_HUMAN@1070		sp|P27348|1433T_HUMAN@157		sp|O15212|PFD6_HUMAN@88
sp|Q15006|EMC2_HUMAN@136		sp|P40227|TCPZ_HUMAN@10		sp|P38646|GRP75_HUMAN@567
sp|P11021|BIP_HUMAN@81		sp|P29401|TKT_HUMAN@352		REV_sp|Q07954|LRP1_HUMAN@3947
sp|P11310|ACADM_HUMAN@212		sp|Q9P013|CWC15_HUMAN@91		sp|P63218|GBG5_HUMAN@12
sp|B5ME19|EIFCL_HUMAN@333		sp|P07814|SYEP_HUMAN@1019		sp|Q99471|PFD5_HUMAN@42
sp|P16104|H2AX_HUMAN@134		sp|P42166|LAP2A_HUMAN@243		sp|Q4VCS5|AMOT_HUMAN@464
sp|Q99733|NP1L4_HUMAN@140		sp|Q9Y490|TLN1_HUMAN@1190		sp|Q9BUJ2|HNRL1_HUMAN@440
sp|O75369|FLNB_HUMAN@1510		sp|P46459|NSF_HUMAN@283		sp|Q9UQ90|SPG7_HUMAN@709
sp|P16403|H12_HUMAN@129		sp|Q9NR30|DDX21_HUMAN@73		sp|P29218|IMPA1_HUMAN@264
sp|Q96TA1|NIBA2_HUMAN@479		sp|Q7Z7H5|TMED4_HUMAN@87		sp|O75794|CD123_HUMAN@327
sp|P09622|DLDH_HUMAN@430		sp|Q9BRJ2|RM45_HUMAN@126		sp|P41252|SYIC_HUMAN@903
sp|Q5QJE6|TDIF2_HUMAN@227		sp|Q08945|SSRP1_HUMAN@566		sp|Q01082|SPTB2_HUMAN@2344
sp|Q8N7H5|PAF1_HUMAN@68		sp|P48643|TCPE_HUMAN@275		sp|Q9H0U4|RAB1B_HUMAN@55
sp|Q07020|RL18_HUMAN@19		sp|P27348|1433T_HUMAN@9		sp|P46781|RS9_HUMAN@52
sp|P56381|ATP5E_HUMAN@37		sp|P15170|ERF3A_HUMAN@309		sp|Q9Y265|RUVB1_HUMAN@165
sp|P19338|NUCL_HUMAN@125		sp|P27695|APEX1_HUMAN@31		sp|O00154|BACH_HUMAN@205
sp|Q5T8P6|RBM26_HUMAN@504		sp|P35659|DEK_HUMAN@292		REV_sp|Q9Y6J0|CABIN_HUMAN@857
sp|P18206|VINC_HUMAN@784		sp|Q12792|TWF1_HUMAN@192		sp|Q14980|NUMA1_HUMAN@1766
sp|P38432|COIL_HUMAN@274		sp|Q9UQ35|SRRM2_HUMAN@980		sp|P56134|ATPK_HUMAN@59
sp|Q14690|RRP5_HUMAN@122		sp|Q13185|CBX3_HUMAN@21		sp|Q15149|PLEC_HUMAN@597
sp|P06576|ATPB_HUMAN@350		sp|P11586|C1TC_HUMAN@832		sp|P50990|TCPQ_HUMAN@466
sp|O95433|AHSA1_HUMAN@39		sp|P56182|RRP1_HUMAN@205		sp|P23381|SYWC_HUMAN@331
sp|P48634|PRC2A_HUMAN@70		sp|P62424|RL7A_HUMAN@26		REV_sp|P0C6X4|R1AB_CVHN5@4534
sp|P15880|RS2_HUMAN@108		sp|Q00341|VIGLN_HUMAN@197		sp|P98175|RBM10_HUMAN@771
sp|Q306W6|POLN_EEEV1@1424		sp|Q96KA5|CLP1L_HUMAN@530		sp|P08758|ANXA5_HUMAN@301
sp|P0C0S5|H2AZ_HUMAN@16		sp|P18206|VINC_HUMAN@1024		sp|Q9UQE7|SMC3_HUMAN@871
sp|O43242|PSMD3_HUMAN@16		sp|P62140|PP1B_HUMAN@303		sp|P46060|RAGP1_HUMAN@172
sp|Q86UE4|LYRIC_HUMAN@174		sp|P27708|PYR1_HUMAN@1618		sp|P18206|VINC_HUMAN@639
sp|Q00610|CLH1_HUMAN@760		sp|P08237|PFKAM_HUMAN@144		sp|P49189|AL9A1_HUMAN@316
sp|Q86VM9|ZCH18_HUMAN@880		sp|Q9BUQ8|DDX23_HUMAN@251		sp|P23786|CPT2_HUMAN@544
sp|Q9NTJ3|SMC4_HUMAN@928		sp|Q14739|LBR_HUMAN@519		sp|Q96I24|FUBP3_HUMAN@32
sp|Q7Z4V5|HDGR2_HUMAN@34		sp|O14974|MYPT1_HUMAN@442		sp|Q99426|TBCB_HUMAN@211
sp|Q8TED0|UTP15_HUMAN@36		sp|P62847|RS24_HUMAN@21		sp|Q13596|SNX1_HUMAN@338
sp|Q4VCS5|AMOT_HUMAN@543		sp|P11388|TOP2A_HUMAN@1068		sp|O43776|SYNC_HUMAN@31
sp|Q5QNW6|H2B2F_HUMAN@21		sp|O60841|IF2P_HUMAN@282		sp|P12004|PCNA_HUMAN@248
sp|P42167|LAP2B_HUMAN@393		sp|P35580|MYH10_HUMAN@51		sp|Q00765|REEP5_HUMAN@172
sp|P48556|PSMD8_HUMAN@138		sp|Q12905|ILF2_HUMAN@360		sp|Q5T5Y3|CAMP1_HUMAN@170
sp|Q15785|TOM34_HUMAN@192		sp|O75152|ZC11A_HUMAN@310		sp|P12814|ACTN1_HUMAN@198
sp|P51452|DUS3_HUMAN@50		sp|P07197|NFM_HUMAN@102		sp|Q14690|RRP5_HUMAN@1239
sp|Q9H6F5|CCD86_HUMAN@350		sp|P61026|RAB10_HUMAN@56		sp|Q9H993|ARMT1_HUMAN@64
sp|Q03252|LMNB2_HUMAN@290		sp|P53355|DAPK1_HUMAN@258		sp|Q8WW12|PCNP_HUMAN@13
sp|Q96QC0|PP1RA_HUMAN@118		sp|Q01167|FOXK2_HUMAN@223		sp|Q14498|RBM39_HUMAN@232
sp|Q99877|H2B1N_HUMAN@6		sp|Q9P2J5|SYLC_HUMAN@9		sp|Q9Y6D6|BIG1_HUMAN@18
sp|P16402|H13_HUMAN@64		sp|P21333|FLNA_HUMAN@1069		sp|Q02880|TOP2B_HUMAN@1177
sp|O15042|SR140_HUMAN@11		sp|Q14677|EPN4_HUMAN@314		sp|P36776|LONM_HUMAN@748
sp|P08238|HS90B_HUMAN@550		sp|P49411|EFTU_HUMAN@350		sp|P48735|IDHP_HUMAN@69
sp|P54709|AT1B3_HUMAN@259		sp|P27694|RFA1_HUMAN@163		sp|P35606|COPB2_HUMAN@783
sp|O15061|SYNEM_HUMAN@710		sp|O14979|HNRDL_HUMAN@204		sp|P56192|SYMC_HUMAN@47
sp|P21333|FLNA_HUMAN@837		sp|Q13310|PABP4_HUMAN@188		REV_sp|Q8WZ42|TITIN_HUMAN@690
sp|P62917|RL8_HUMAN@145		sp|Q01105|SET_HUMAN@167		sp|Q92616|GCN1_HUMAN@616
sp|P61163|ACTZ_HUMAN@319		sp|P49588|SYAC_HUMAN@558		sp|P31689|DNJA1_HUMAN@23
sp|Q13428|TCOF_HUMAN@1387		sp|Q9Y4L1|HYOU1_HUMAN@75		sp|O60832|DKC1_HUMAN@443
sp|Q14232|EI2BA_HUMAN@145		sp|Q8NHQ9|DDX55_HUMAN@47		sp|Q9BPX3|CND3_HUMAN@537
sp|P20290|BTF3_HUMAN@54		sp|Q99590|SCAFB_HUMAN@1428		sp|P23378|GCSP_HUMAN@672
sp|P41250|GARS_HUMAN@487		sp|P35613|BASI_HUMAN@375		sp|Q14696|MESD_HUMAN@100
sp|P49327|FAS_HUMAN@1704		sp|Q14978|NOLC1_HUMAN@401		sp|P23588|IF4B_HUMAN@453
sp|Q9BQE3|TBA1C_HUMAN@326		sp|O94906|PRP6_HUMAN@925		sp|P46087|NOP2_HUMAN@66
sp|P09661|RU2A_HUMAN@221		sp|Q6PI48|SYDM_HUMAN@224		sp|Q9NU22|MDN1_HUMAN@117
sp|P11413|G6PD_HUMAN@95		sp|Q9UKX7|NUP50_HUMAN@62		sp|P21333|FLNA_HUMAN@891
sp|P61981|1433G_HUMAN@69		sp|Q15424|SAFB1_HUMAN@570		sp|P35659|DEK_HUMAN@284
sp|P24752|THIL_HUMAN@243		sp|P49207|RL34_HUMAN@115		sp|Q8IY31|IFT20_HUMAN@80
sp|Q9HC35|EMAL4_HUMAN@164		sp|P39748|FEN1_HUMAN@345		sp|Q13601|KRR1_HUMAN@327
sp|Q9BXJ9|NAA15_HUMAN@649		sp|Q9NSD9|SYFB_HUMAN@560		sp|P57772|SELB_HUMAN@542
sp|Q9UN86|G3BP2_HUMAN@281		sp|P46781|RS9_HUMAN@47		sp|P09211|GSTP1_HUMAN@121
sp|P16401|H15_HUMAN@109		sp|O15347|HMGB3_HUMAN@65		sp|Q9UJ83|HACL1_HUMAN@214
sp|Q13428|TCOF_HUMAN@1083		sp|P19338|NUCL_HUMAN@370		sp|P33240|CSTF2_HUMAN@189
sp|P55209|NP1L1_HUMAN@82		sp|O75533|SF3B1_HUMAN@6		sp|Q9Y3A6|TMED5_HUMAN@224
sp|Q86UE4|LYRIC_HUMAN@303		sp|Q8WUM4|PDC6I_HUMAN@327		sp|P11717|MPRI_HUMAN@2470
sp|Q9H3P7|GCP60_HUMAN@386		sp|P62266|RS23_HUMAN@48		sp|P35658|NU214_HUMAN@1309
sp|P46013|KI67_HUMAN@1208		sp|O60812|HNRC1_HUMAN@29		sp|Q9UMS4|PRP19_HUMAN@122
sp|P30050|RL12_HUMAN@48		sp|Q13868|EXOS2_HUMAN@180		sp|P78527|PRKDC_HUMAN@2928
sp|P04075|ALDOA_HUMAN@99		sp|Q9NWH9|SLTM_HUMAN@340		sp|P53007|TXTP_HUMAN@149
sp|Q9UIG0|BAZ1B_HUMAN@322		sp|Q16222|UAP1_HUMAN@152		sp|Q5T6V5|QNG1_HUMAN@38
sp|P52272|HNRPM_HUMAN@388		sp|Q13263|TIF1B_HUMAN@199		sp|P50990|TCPQ_HUMAN@459
sp|P07237|PDIA1_HUMAN@424		sp|Q02818|NUCB1_HUMAN@81		sp|Q01813|PFKAP_HUMAN@688
sp|P35520|CBS_HUMAN@30		sp|Q53H12|AGK_HUMAN@199		sp|Q02818|NUCB1_HUMAN@99
sp|P24534|EF1B_HUMAN@185		sp|P48444|COPD_HUMAN@164		sp|Q9Y3U8|RL36_HUMAN@23
sp|Q9H307|PININ_HUMAN@75		sp|P61978|HNRPK_HUMAN@66		sp|Q9BW27|NUP85_HUMAN@540
sp|O75369|FLNB_HUMAN@492		sp|Q13813|SPTN1_HUMAN@814		sp|Q86UY8|NT5D3_HUMAN@138
sp|P22695|QCR2_HUMAN@359		sp|O60832|DKC1_HUMAN@433		sp|P61978|HNRPK_HUMAN@198
sp|Q13148|TADBP_HUMAN@181		sp|O75533|SF3B1_HUMAN@214		sp|P11413|G6PD_HUMAN@82
sp|Q8N3U4|STAG2_HUMAN@36		sp|P08238|HS90B_HUMAN@607		sp|Q9ULX6|AKP8L_HUMAN@418
sp|O75592|MYCB2_HUMAN@3827		sp|Q6FI81|CPIN1_HUMAN@26		sp|O95202|LETM1_HUMAN@274
sp|P07814|SYEP_HUMAN@733		sp|P51572|BAP31_HUMAN@190		sp|Q01518|CAP1_HUMAN@209
sp|Q8IYB3|SRRM1_HUMAN@762		sp|P16403|H12_HUMAN@148		sp|Q92820|GGH_HUMAN@212
sp|P61201|CSN2_HUMAN@48		sp|Q14204|DYHC1_HUMAN@1228		sp|P49419|AL7A1_HUMAN@462
sp|Q5EBM4|ZN542_HUMAN@57		sp|P00338|LDHA_HUMAN@232		REV_sp|P28290|ITPI2_HUMAN@1043
sp|P62424|RL7A_HUMAN@34		sp|P37837|TALDO_HUMAN@277		sp|Q9P258|RCC2_HUMAN@124
sp|Q9BYG3|MK67I_HUMAN@158		sp|P55084|ECHB_HUMAN@272		sp|O14569|C56D2_HUMAN@154
sp|O94900|TOX_HUMAN@280		sp|P54577|SYYC_HUMAN@474		sp|Q6P1L8|RM14_HUMAN@120
sp|Q14978|NOLC1_HUMAN@151		sp|P09622|DLDH_HUMAN@159		sp|Q9Y266|NUDC_HUMAN@196
REV_sp|Q9NSJ1|Z355P_HUMAN@315		sp|Q13428|TCOF_HUMAN@1263		sp|Q12959|DLG1_HUMAN@321
sp|P16989|YBOX3_HUMAN@85		sp|P46777|RL5_HUMAN@19		sp|Q10469|MGAT2_HUMAN@226
sp|Q9BVJ6|UT14A_HUMAN@196		sp|P55884|EIF3B_HUMAN@552		sp|Q96HY7|DHTK1_HUMAN@800
sp|Q9Y5B9|SP16H_HUMAN@507		sp|P49792|RBP2_HUMAN@542		sp|O00330|ODPX_HUMAN@394
sp|Q00325|S25A3_HUMAN@252		sp|O00425|IF2B3_HUMAN@294		sp|O00469|PLOD2_HUMAN@148
sp|P21333|FLNA_HUMAN@700		sp|Q92878|RAD50_HUMAN@112		sp|P49368|TCPG_HUMAN@425
sp|P07237|PDIA1_HUMAN@276		sp|P49368|TCPG_HUMAN@353		sp|P33991|MCM4_HUMAN@770
sp|P60953|CDC42_HUMAN@135		sp|O60869|EDF1_HUMAN@98		sp|P09874|PARP1_HUMAN@196
sp|P26641|EF1G_HUMAN@52		sp|P63165|SUMO1_HUMAN@37		sp|Q5VTE0|EF1A3_HUMAN@172
sp|Q9Y617|SERC_HUMAN@311		sp|Q9NR30|DDX21_HUMAN@555		sp|Q12905|ILF2_HUMAN@45
sp|Q8IX12|CCAR1_HUMAN@1088		sp|Q92616|GCN1_HUMAN@1338		sp|P25788|PSA3_HUMAN@230
sp|O75251|NDUS7_HUMAN@48		sp|Q9C0D5|TANC1_HUMAN@1529		sp|A6NFF2|NP1L6_HUMAN@55
sp|Q9HD15|SRA1_HUMAN@146		sp|Q9Y230|RUVB2_HUMAN@427		sp|Q9H993|ARMT1_HUMAN@40
sp|Q9Y520|PRC2C_HUMAN@387		sp|P78527|PRKDC_HUMAN@4085		sp|Q13555|KCC2G_HUMAN@57
sp|Q9H0C8|ILKAP_HUMAN@185		sp|Q9NVS9|PNPO_HUMAN@187		sp|Q9NVZ3|NECP2_HUMAN@153
sp|Q9HB71|CYBP_HUMAN@41		sp|P18206|VINC_HUMAN@228		sp|P83731|RL24_HUMAN@27
sp|P62826|RAN_HUMAN@12		sp|P22102|PUR2_HUMAN@162		sp|P36578|RL4_HUMAN@29
sp|Q8TDD1|DDX54_HUMAN@125		sp|O95757|HS74L_HUMAN@707		sp|O15371|EIF3D_HUMAN@53
sp|P11388|TOP2A_HUMAN@1070		sp|P22392|NDKB_HUMAN@124		sp|Q5T9A4|ATD3B_HUMAN@214
sp|O00746|NDKM_HUMAN@45		sp|P49915|GUAA_HUMAN@145		sp|Q9BQG0|MBB1A_HUMAN@344
sp|P46013|KI67_HUMAN@2734		sp|Q9C0D2|CE295_HUMAN@1730		sp|P22570|ADRO_HUMAN@376
sp|O75964|ATP5L_HUMAN@54		sp|O75521|ECI2_HUMAN@90		sp|P55060|XPO2_HUMAN@425
REV_sp|Q99996|AKAP9_HUMAN@11667		sp|P50990|TCPQ_HUMAN@296		sp|P09874|PARP1_HUMAN@269
sp|P21333|FLNA_HUMAN@2569		sp|Q9NZD2|GLTP_HUMAN@55		sp|Q8WU90|ZC3HF_HUMAN@86
sp|Q9BQG0|MBB1A_HUMAN@1247		sp|P62081|RS7_HUMAN@74		sp|P12270|TPR_HUMAN@165
sp|P08559|ODPA_HUMAN@83		sp|P07311|ACYP1_HUMAN@25		sp|P17066|HSP76_HUMAN@453
sp|P31948|STIP1_HUMAN@237		sp|P22307|SCP2_HUMAN@470		sp|Q04637|IF4G1_HUMAN@1364
sp|P09211|GSTP1_HUMAN@128		sp|Q9H6Z4|RANB3_HUMAN@471		sp|Q3ZCW2|LEGL_HUMAN@170
sp|P83881|RL36A_HUMAN@38		sp|O43447|PPIH_HUMAN@164		sp|P49321|NASP_HUMAN@442
sp|P48047|ATPO_HUMAN@162		REV_sp|Q5THK1|PR14L_HUMAN@112		sp|Q8WWK9|CKAP2_HUMAN@91
sp|Q15691|MARE1_HUMAN@148		sp|O15381|NVL_HUMAN@759		sp|P35998|PRS7_HUMAN@418
sp|Q9BZK7|TBL1R_HUMAN@102		sp|Q9NP79|VTA1_HUMAN@300		sp|P13073|COX41_HUMAN@87
sp|Q04637|IF4G1_HUMAN@832		sp|Q8NI27|THOC2_HUMAN@845		sp|O00231|PSD11_HUMAN@82
REV_sp|O15078|CE290_HUMAN@1000		sp|P07195|LDHB_HUMAN@233		sp|Q02818|NUCB1_HUMAN@177
sp|P0DMR1|HNRC4_HUMAN@203		sp|Q15067|ACOX1_HUMAN@260		sp|P14618|KPYM_HUMAN@186
sp|Q13428|TCOF_HUMAN@74		sp|Q14978|NOLC1_HUMAN@579		sp|Q96I99|SUCB2_HUMAN@93
sp|P08133|ANXA6_HUMAN@620		sp|Q14152|EIF3A_HUMAN@538		sp|P55265|DSRAD_HUMAN@1115
sp|P22314|UBA1_HUMAN@884		sp|P58511|SIM11_HUMAN@41		sp|Q9BTX1|NDC1_HUMAN@430
sp|Q9Y2W1|TR150_HUMAN@173		sp|P09429|HMGB1_HUMAN@30		sp|O96017|CHK2_HUMAN@437
sp|P82979|SARNP_HUMAN@28		sp|P46087|NOP2_HUMAN@767		sp|Q2TAY7|SMU1_HUMAN@337
sp|O75475|PSIP1_HUMAN@189		sp|Q07666|KHDR1_HUMAN@169		sp|P23193|TCEA1_HUMAN@199
sp|O15372|EIF3H_HUMAN@28		sp|P06576|ATPB_HUMAN@426		sp|P31483|TIA1_HUMAN@145
sp|P22102|PUR2_HUMAN@156		sp|P06737|PYGL_HUMAN@724		sp|P35659|DEK_HUMAN@291
sp|Q9H936|GHC1_HUMAN@96		sp|Q14008|CKAP5_HUMAN@1083		sp|Q9NRZ9|HELLS_HUMAN@475
sp|O75533|SF3B1_HUMAN@175		sp|P49368|TCPG_HUMAN@248		sp|P62308|RUXG_HUMAN@20
sp|Q13823|NOG2_HUMAN@434		sp|P48047|ATPO_HUMAN@73		REV_sp|Q13535|ATR_HUMAN@253
sp|Q9Y3B4|SF3B6_HUMAN@125		sp|P35580|MYH10_HUMAN@1761		sp|O75190|DNJB6_HUMAN@20
sp|O00410|IPO5_HUMAN@503		sp|P17858|PFKAL_HUMAN@726		sp|O43670|ZN207_HUMAN@31
sp|P35268|RL22_HUMAN@52		sp|P07910|HNRPC_HUMAN@89		sp|Q08752|PPID_HUMAN@331
sp|Q07021|C1QBP_HUMAN@280		sp|P24539|AT5F1_HUMAN@191		sp|P31946|1433B_HUMAN@117
sp|P11021|BIP_HUMAN@447		sp|P42704|LPPRC_HUMAN@760		sp|P19623|SPEE_HUMAN@194
sp|P61077|UB2D3_HUMAN@8		sp|P52209|6PGD_HUMAN@261		sp|O95684|CEP43_HUMAN@173
sp|P61244|MAX_HUMAN@57		sp|Q9Y2X3|NOP58_HUMAN@21		sp|O15347|HMGB3_HUMAN@174
sp|Q05639|EF1A2_HUMAN@255		sp|Q9UQ35|SRRM2_HUMAN@920		sp|P53007|TXTP_HUMAN@97
sp|Q6Y7W6|GGYF2_HUMAN@1185		sp|O14602|IF1AY_HUMAN@104		sp|Q9BTA9|WAC_HUMAN@302
sp|P42765|THIM_HUMAN@81		sp|P50395|GDIB_HUMAN@164		sp|Q9BVK6|TMED9_HUMAN@180
sp|Q9UQN3|CHM2B_HUMAN@37		sp|Q8NFW8|NEUA_HUMAN@200		sp|Q5UIP0|RIF1_HUMAN@521
sp|Q8N3U4|STAG2_HUMAN@755		sp|O14715|RGPD8_HUMAN@619		sp|Q9UNX4|WDR3_HUMAN@366
sp|P13073|COX41_HUMAN@53		sp|O43772|MCAT_HUMAN@202		sp|Q6IBS0|TWF2_HUMAN@194
sp|P06733|ENOA_HUMAN@92		sp|Q14318|FKBP8_HUMAN@340		sp|Q12802|AKP13_HUMAN@747
sp|P21333|FLNA_HUMAN@865		sp|P78527|PRKDC_HUMAN@1612		sp|P49756|RBM25_HUMAN@726
sp|O43390|HNRPR_HUMAN@41		sp|Q96S59|RANB9_HUMAN@190		sp|Q8WU90|ZC3HF_HUMAN@13
sp|P78371|TCPB_HUMAN@248		sp|P49756|RBM25_HUMAN@75		sp|P10809|CH60_HUMAN@202
sp|P60174|TPIS_HUMAN@188		sp|P30049|ATPD_HUMAN@136		sp|P09622|DLDH_HUMAN@505
sp|Q12931|TRAP1_HUMAN@629		sp|P21333|FLNA_HUMAN@1538		sp|P08069|IGF1R_HUMAN@442
sp|Q8IYB3|SRRM1_HUMAN@216		sp|P48643|TCPE_HUMAN@226		sp|Q9Y5L0|TNPO3_HUMAN@877
sp|P62424|RL7A_HUMAN@75		sp|P04637|P53_HUMAN@370		sp|Q14562|DHX8_HUMAN@885
sp|O43143|DHX15_HUMAN@185		sp|P51858|HDGF_HUMAN@80		sp|O43592|XPOT_HUMAN@668
REV_sp|Q9NZJ4|SACS_HUMAN@2778		sp|Q92541|RTF1_HUMAN@302		sp|P46060|RAGP1_HUMAN@15
sp|Q9BVK6|TMED9_HUMAN@232		sp|Q12931|TRAP1_HUMAN@126		sp|P57059|SIK1_HUMAN@346
sp|P42167|LAP2B_HUMAN@13		sp|Q14677|EPN4_HUMAN@192		sp|P19338|NUCL_HUMAN@572
sp|Q9Y4E1|WAC2C_HUMAN@901		sp|P35249|RFC4_HUMAN@33		sp|O75475|PSIP1_HUMAN@100
sp|P12270|TPR_HUMAN@1006		sp|Q13243|SRSF5_HUMAN@238		sp|P41240|CSK_HUMAN@67
sp|Q92572|AP3S1_HUMAN@166		sp|Q5CZC0|FSIP2_HUMAN@297		sp|Q14254|FLOT2_HUMAN@305
sp|O75964|ATP5L_HUMAN@55		sp|Q9H501|ESF1_HUMAN@197		sp|Q09666|AHNK_HUMAN@1870
[truncated: 15,835 more rows]

## Sheet: AZ9
set1		set2		set3
sp|Leading Ac|Genename@Site		sp|Leading Ac|Genename@Site		sp|Leading Ac|Genename@Site
sp|Q8NC51|SERB1_HUMAN@7		sp|Q5TAX3|TUT4_HUMAN@202		sp|Q14139|UBE4A_HUMAN@312
sp|Q99728|BARD1_HUMAN@301		sp|Q8NC51|SERB1_HUMAN@7		sp|Q96DV4|RM38_HUMAN@46
sp|P22626|ROA2_HUMAN@195		sp|P40938|RFC3_HUMAN@65		sp|O95573|ACSL3_HUMAN@675
sp|P56182|RRP1_HUMAN@184		sp|P17844|DDX5_HUMAN@408		sp|Q9BVP2|GNL3_HUMAN@335
sp|P36542|ATPG_HUMAN@249		sp|P50213|IDH3A_HUMAN@65		sp|O94905|ERLN2_HUMAN@328
sp|P50990|TCPQ_HUMAN@485		sp|Q99728|BARD1_HUMAN@301		sp|P51116|FXR2_HUMAN@319
sp|Q13509|TBB3_HUMAN@118		sp|P62750|RL23A_HUMAN@148		sp|P35613|BASI_HUMAN@357
sp|Q93008|USP9X_HUMAN@1228		sp|P22626|ROA2_HUMAN@195		sp|Q15758|AAAT_HUMAN@251
sp|P53365|ARFP2_HUMAN@244		sp|P78527|PRKDC_HUMAN@241		sp|Q9UJC3|HOOK1_HUMAN@163
sp|P62269|RS18_HUMAN@61		sp|Q9BQG0|MBB1A_HUMAN@287		sp|P14999|LT_POVBA@44
sp|P16615|AT2A2_HUMAN@679		sp|P56182|RRP1_HUMAN@184		sp|Q969Q0|RL36L_HUMAN@71
sp|Q06323|PSME1_HUMAN@26		sp|P17844|DDX5_HUMAN@335		REV_sp|Q6EEV6|SUMO4_HUMAN@88
sp|P78527|PRKDC_HUMAN@2115		sp|P36542|ATPG_HUMAN@249		sp|Q92621|NU205_HUMAN@1735
sp|P68371|TBB4B_HUMAN@128		sp|Q13509|TBB3_HUMAN@118		sp|Q06323|PSME1_HUMAN@51
sp|Q96T51|RUFY1_HUMAN@348		sp|P53365|ARFP2_HUMAN@244		sp|Q06830|PRDX1_HUMAN@155
sp|P35613|BASI_HUMAN@357		sp|Q93008|USP9X_HUMAN@1228		sp|P36578|RL4_HUMAN@421
sp|P63261|ACTG_HUMAN@241		sp|P62269|RS18_HUMAN@61		sp|P42167|LAP2B_HUMAN@170
sp|O00410|IPO5_HUMAN@676		sp|Q00610|CLH1_HUMAN@891		sp|P31040|SDHA_HUMAN@490
REV_sp|Q9Y2I8|WDR37_HUMAN@344		sp|O14656|TOR1A_HUMAN@229		sp|Q9NRL2|BAZ1A_HUMAN@607
sp|P56192|SYMC_HUMAN@212		sp|Q13155|AIMP2_HUMAN@46		sp|P49411|EFTU_HUMAN@449
sp|O94979|SC31A_HUMAN@792		sp|P16615|AT2A2_HUMAN@679		REV_sp|Q9NY27|PP4R2_HUMAN@61
sp|P61803|DAD1_HUMAN@91		sp|P78527|PRKDC_HUMAN@2115		sp|P24752|THIL_HUMAN@210
sp|B2RPK0|HGB1A_HUMAN@116		sp|P68371|TBB4B_HUMAN@128		sp|P62249|RS16_HUMAN@123
sp|P62333|PRS10_HUMAN@250		sp|Q96T51|RUFY1_HUMAN@348		sp|Q9Y3Z3|SAMH1_HUMAN@459
sp|P49411|EFTU_HUMAN@247		sp|P31350|RIR2_HUMAN@302		sp|P24752|THIL_HUMAN@274
sp|O00232|PSD12_HUMAN@220		sp|P63261|ACTG_HUMAN@241		sp|Q9BQG0|MBB1A_HUMAN@435
sp|P46939|UTRN_HUMAN@970		sp|O00410|IPO5_HUMAN@676		sp|P36578|RL4_HUMAN@56
sp|P53007|TXTP_HUMAN@153		sp|Q00839|HNRPU_HUMAN@624		sp|P07900|HS90A_HUMAN@200
sp|P62269|RS18_HUMAN@58		sp|P56192|SYMC_HUMAN@212		sp|P38606|VATA_HUMAN@510
sp|P78527|PRKDC_HUMAN@3698		sp|Q96QC0|PP1RA_HUMAN@128		sp|P10809|CH60_HUMAN@307
sp|Q96HE7|ERO1A_HUMAN@29		sp|P04406|G3P_HUMAN@267		sp|P46781|RS9_HUMAN@59
sp|Q5VTE0|EF1A3_HUMAN@388		sp|O94979|SC31A_HUMAN@792		sp|P40938|RFC3_HUMAN@122
sp|P17987|TCPA_HUMAN@267		sp|P54136|SYRC_HUMAN@284		sp|Q14684|RRP1B_HUMAN@280
sp|P98177|FOXO4_HUMAN@61		sp|P62899|RL31_HUMAN@96		sp|P54819|KAD2_HUMAN@9
sp|Q9UJX3|APC7_HUMAN@474		sp|P61803|DAD1_HUMAN@91		sp|Q9NU22|MDN1_HUMAN@129
sp|P10809|CH60_HUMAN@139		sp|Q96GA3|LTV1_HUMAN@33		sp|P30520|PURA2_HUMAN@433
sp|P78371|TCPB_HUMAN@19		sp|Q9BVA1|TBB2B_HUMAN@325		sp|Q99536|VAT1_HUMAN@36
sp|P22626|ROA2_HUMAN@192		sp|P49411|EFTU_HUMAN@247		sp|Q9GZT9|EGLN1_HUMAN@141
sp|P19367|HXK1_HUMAN@249		sp|O00232|PSD12_HUMAN@220		sp|Q7L014|DDX46_HUMAN@664
sp|P18621|RL17_HUMAN@154		sp|Q5VTE0|EF1A3_HUMAN@328		sp|P49368|TCPG_HUMAN@131
sp|Q8TCT9|HM13_HUMAN@250		sp|P46939|UTRN_HUMAN@970		sp|P49327|FAS_HUMAN@2385
sp|Q8NFH5|NUP35_HUMAN@253		sp|P53007|TXTP_HUMAN@153		sp|Q5JTH9|RRP12_HUMAN@611
sp|P06493|CDK1_HUMAN@40		sp|O75592|MYCB2_HUMAN@830		sp|O15381|NVL_HUMAN@343
sp|P53985|MOT1_HUMAN@228		sp|P26641|EF1G_HUMAN@206		sp|Q9UNX3|RL26L_HUMAN@10
sp|P11586|C1TC_HUMAN@260		sp|P14625|ENPL_HUMAN@110		sp|Q6UB35|C1TM_HUMAN@919
sp|P18124|RL7_HUMAN@237		sp|Q8NBM4|UBAC2_HUMAN@325		sp|P08240|SRPRA_HUMAN@40
sp|P17987|TCPA_HUMAN@473		sp|P62269|RS18_HUMAN@58		sp|P35613|BASI_HUMAN@359
sp|Q9UBV8|PEF1_HUMAN@241		sp|P78527|PRKDC_HUMAN@3698		sp|P84098|RL19_HUMAN@25
sp|Q9Y678|COPG1_HUMAN@30		REV_sp|Q3KSS7|BRLF1_EBVG@75		sp|Q8WY22|BRI3B_HUMAN@222
sp|Q5VTE0|EF1A3_HUMAN@288		sp|P49591|SYSC_HUMAN@322		sp|Q13509|TBB3_HUMAN@74
sp|Q14204|DYHC1_HUMAN@4261		sp|Q5VTE0|EF1A3_HUMAN@388		sp|Q5SRD1|TI23B_HUMAN@59
sp|P31350|RIR2_HUMAN@306		sp|P48643|TCPE_HUMAN@272		sp|Q5T9A4|ATD3B_HUMAN@316
sp|P0CG38|POTEI_HUMAN@926		REV_sp|Q86U86|PB1_HUMAN@601		sp|Q9NPL8|TIDC1_HUMAN@215
sp|Q01650|LAT1_HUMAN@40		sp|P17987|TCPA_HUMAN@267		sp|P15924|DESP_HUMAN@656
sp|P05141|ADT2_HUMAN@64		sp|P78371|TCPB_HUMAN@19		sp|P52272|HNRPM_HUMAN@530
sp|Q9P2X3|IMPCT_HUMAN@166		sp|P78527|PRKDC_HUMAN@3724		sp|P40227|TCPZ_HUMAN@150
sp|Q9Y3T9|NOC2L_HUMAN@647		sp|Q8NB25|F184A_HUMAN@611		sp|Q9H9B4|SFXN1_HUMAN@45
sp|Q96B36|AKTS1_HUMAN@56		sp|P22626|ROA2_HUMAN@192		sp|O95071|UBR5_HUMAN@2287
sp|P07814|SYEP_HUMAN@1398		sp|P18621|RL17_HUMAN@154		sp|P62979|RS27A_HUMAN@110
sp|Q14690|RRP5_HUMAN@130		sp|Q8TCT9|HM13_HUMAN@250		sp|P35251|RFC1_HUMAN@736
sp|Q9BQE3|TBA1C_HUMAN@367		sp|Q8NFH5|NUP35_HUMAN@253		sp|Q9BZX2|UCK2_HUMAN@205
sp|P00338|LDHA_HUMAN@311		sp|P06493|CDK1_HUMAN@40		sp|P40818|UBP8_HUMAN@1085
sp|Q9Y5J1|UTP18_HUMAN@88		sp|P53985|MOT1_HUMAN@228		sp|Q9NTI5|PDS5B_HUMAN@94
sp|O43175|SERA_HUMAN@68		sp|Q14204|DYHC1_HUMAN@855		sp|O94906|PRP6_HUMAN@895
sp|Q05639|EF1A2_HUMAN@45		sp|Q9UL46|PSME2_HUMAN@201		sp|Q9NRX5|SERC1_HUMAN@367
sp|P16615|AT2A2_HUMAN@522		sp|P11586|C1TC_HUMAN@260		sp|Q14011|CIRBP_HUMAN@172
sp|P07900|HS90A_HUMAN@200		sp|P40429|RL13A_HUMAN@100		sp|O14727|APAF_HUMAN@283
sp|Q9BVP2|GNL3_HUMAN@152		sp|P26373|RL13_HUMAN@172		sp|Q8NC51|SERB1_HUMAN@120
sp|O94905|ERLN2_HUMAN@70		sp|P18124|RL7_HUMAN@237		sp|Q7L1W4|LRC8D_HUMAN@194
sp|Q7Z2T5|TRM1L_HUMAN@345		sp|P17987|TCPA_HUMAN@473		sp|Q9Y678|COPG1_HUMAN@358
sp|P12235|ADT1_HUMAN@30		sp|Q9UBV8|PEF1_HUMAN@241		sp|Q6P087|RUSD3_HUMAN@77
sp|Q01105|SET_HUMAN@160		sp|Q00610|CLH1_HUMAN@1100		sp|Q9Y3F4|STRAP_HUMAN@133
sp|P00338|LDHA_HUMAN@217		sp|A0A8I5KQE6|RPSA2_HUMAN@69		sp|Q9BTX1|NDC1_HUMAN@400
sp|Q9H061|T126A_HUMAN@28		sp|Q9Y678|COPG1_HUMAN@30		sp|P42356|PI4KA_HUMAN@1127
sp|Q14739|LBR_HUMAN@288		sp|P43243|MATR3_HUMAN@124		sp|P15924|DESP_HUMAN@97
REV_sp|Q8IX03|KIBRA_HUMAN@1109		sp|Q5VTE0|EF1A3_HUMAN@288		sp|Q8N6R0|EFNMT_HUMAN@240
sp|P35250|RFC2_HUMAN@55		sp|Q9UKF6|CPSF3_HUMAN@539		sp|P21333|FLNA_HUMAN@1892
sp|P06748|NPM_HUMAN@37		sp|P0CG38|POTEI_HUMAN@926		sp|Q9H2P0|ADNP_HUMAN@33
sp|P07814|SYEP_HUMAN@1468		sp|Q01650|LAT1_HUMAN@40		sp|P27635|RL10_HUMAN@55
sp|P61978|HNRPK_HUMAN@431		sp|Q02878|RL6_HUMAN@234		sp|P23396|RS3_HUMAN@68
sp|Q9UQ35|SRRM2_HUMAN@2128		sp|Q8N0X7|SPART_HUMAN@345		sp|P19338|NUCL_HUMAN@581
sp|Q8TB61|S35B2_HUMAN@91		sp|P05141|ADT2_HUMAN@64		sp|P56192|SYMC_HUMAN@382
sp|P10809|CH60_HUMAN@413		sp|Q9P2X3|IMPCT_HUMAN@166		sp|P11586|C1TC_HUMAN@29
sp|Q969Q0|RL36L_HUMAN@92		sp|Q9Y3T9|NOC2L_HUMAN@647		sp|Q92504|S39A7_HUMAN@307
sp|P0CG38|POTEI_HUMAN@724		sp|P07814|SYEP_HUMAN@1398		sp|P54886|P5CS_HUMAN@738
sp|P25705|ATPA_HUMAN@144		sp|Q14690|RRP5_HUMAN@130		sp|Q53H12|AGK_HUMAN@200
sp|P04843|RPN1_HUMAN@470		sp|Q9BQE3|TBA1C_HUMAN@367		sp|P36578|RL4_HUMAN@145
sp|P52272|HNRPM_HUMAN@516		sp|Q9NZB2|F120A_HUMAN@1106		sp|Q9NVI1|FANCI_HUMAN@428
sp|Q06830|PRDX1_HUMAN@182		sp|P62249|RS16_HUMAN@123		sp|O00148|DX39A_HUMAN@54
sp|P78527|PRKDC_HUMAN@2116		sp|P00338|LDHA_HUMAN@311		sp|P50991|TCPD_HUMAN@402
sp|Q9BQE3|TBA1C_HUMAN@429		sp|P62241|RS8_HUMAN@164		sp|P00367|DHE3_HUMAN@155
sp|P26373|RL13_HUMAN@142		sp|Q9Y5J1|UTP18_HUMAN@88		REV_sp|Q9P299|COPZ2_HUMAN@26
sp|Q14204|DYHC1_HUMAN@2841		sp|O43143|DHX15_HUMAN@379		sp|P10321|HLAC_HUMAN@63
sp|P08238|HS90B_HUMAN@631		sp|Q9BZK7|TBL1R_HUMAN@217		sp|P04843|RPN1_HUMAN@94
sp|P17987|TCPA_HUMAN@142		sp|O43175|SERA_HUMAN@68		sp|Q15021|CND1_HUMAN@1302
sp|Q9Y5M8|SRPRB_HUMAN@259		sp|P52701|MSH6_HUMAN@1310		sp|Q9UKK9|NUDT5_HUMAN@60
sp|Q09028|RBBP4_HUMAN@10		sp|Q05639|EF1A2_HUMAN@45		sp|Q9H6R4|NOL6_HUMAN@43
REV_sp|Q96G61|NUD11_HUMAN@135		sp|P13797|PLST_HUMAN@43		sp|Q96GQ7|DDX27_HUMAN@333
sp|Q9Y4B6|DCAF1_HUMAN@45		sp|P11586|C1TC_HUMAN@158		sp|Q96ME7|ZN512_HUMAN@542
sp|Q12789|TF3C1_HUMAN@541		sp|P31930|QCR1_HUMAN@435		sp|Q99848|EBP2_HUMAN@263
sp|P78527|PRKDC_HUMAN@2990		sp|Q93075|TATD2_HUMAN@700		sp|P09651|ROA1_HUMAN@93
sp|O43837|IDH3B_HUMAN@175		sp|P16615|AT2A2_HUMAN@522		sp|Q9Y6E2|5MP1_HUMAN@87
sp|Q9UQ35|SRRM2_HUMAN@2457		sp|P07900|HS90A_HUMAN@200		sp|Q9Y2L1|RRP44_HUMAN@425
sp|Q92616|GCN1_HUMAN@1789		sp|O00567|NOP56_HUMAN@237		sp|Q14746|COG2_HUMAN@97
sp|Q12789|TF3C1_HUMAN@81		sp|P42166|LAP2A_HUMAN@505		sp|P49755|TMEDA_HUMAN@150
sp|Q9BVC6|TM109_HUMAN@213		sp|Q9BVP2|GNL3_HUMAN@152		sp|P78527|PRKDC_HUMAN@3216
sp|P18085|ARF4_HUMAN@102		sp|Q96GQ7|DDX27_HUMAN@620		sp|Q86SZ2|TPC6B_HUMAN@26
sp|O75947|ATP5H_HUMAN@93		sp|P49411|EFTU_HUMAN@244		sp|O43242|PSMD3_HUMAN@384
sp|Q86VP6|CAND1_HUMAN@1188		sp|Q01105|SET_HUMAN@160		sp|Q6P158|DHX57_HUMAN@128
sp|P62263|RS14_HUMAN@130		sp|P00338|LDHA_HUMAN@217		sp|O60494|CUBN_HUMAN@998
sp|P42166|LAP2A_HUMAN@510		sp|P53618|COPB_HUMAN@335		sp|Q96JI7|SPTCS_HUMAN@2030
sp|Q05639|EF1A2_HUMAN@403		sp|Q14739|LBR_HUMAN@288		sp|P23396|RS3_HUMAN@20
sp|O95714|HERC2_HUMAN@4794		sp|P52272|HNRPM_HUMAN@484		sp|P06703|S10A6_HUMAN@59
sp|P19367|HXK1_HUMAN@252		sp|P06748|NPM_HUMAN@37		sp|Q9BQG0|MBB1A_HUMAN@242
sp|P53985|MOT1_HUMAN@232		sp|P07814|SYEP_HUMAN@1468		sp|P12004|PCNA_HUMAN@115
sp|O43592|XPOT_HUMAN@642		sp|P61978|HNRPK_HUMAN@431		sp|Q04837|SSBP_HUMAN@17
sp|Q92878|RAD50_HUMAN@77		sp|Q9UQ35|SRRM2_HUMAN@2128		sp|Q01433|AMPD2_HUMAN@71
sp|Q00839|HNRPU_HUMAN@535		sp|P62701|RS4X_HUMAN@60		sp|Q13148|TADBP_HUMAN@87
sp|P41252|SYIC_HUMAN@145		sp|P10809|CH60_HUMAN@413		sp|P13639|EF2_HUMAN@640
sp|Q13509|TBB3_HUMAN@74		sp|Q969Q0|RL36L_HUMAN@92		REV_sp|Q7KZF4|SND1_HUMAN@413
sp|P52272|HNRPM_HUMAN@703		sp|P0CG38|POTEI_HUMAN@724		sp|Q9UKU7|ACAD8_HUMAN@343
sp|P49368|TCPG_HUMAN@351		sp|P09936|UCHL1_HUMAN@7		sp|Q9UK61|TASOR_HUMAN@621
sp|P09211|GSTP1_HUMAN@37		sp|P25705|ATPA_HUMAN@144		sp|O00244|ATOX1_HUMAN@9
sp|P46782|RS5_HUMAN@70		sp|P06493|CDK1_HUMAN@42		sp|P68366|TBA4A_HUMAN@429
sp|P23396|RS3_HUMAN@225		sp|P04843|RPN1_HUMAN@470		sp|P62258|1433E_HUMAN@5
sp|P52272|HNRPM_HUMAN@523		sp|P78527|PRKDC_HUMAN@2116		sp|P78318|IGBP1_HUMAN@66
sp|Q9BQE3|TBA1C_HUMAN@220		sp|Q13838|DX39B_HUMAN@213		sp|Q9BSD7|NTPCR_HUMAN@40
sp|P56182|RRP1_HUMAN@188		sp|P26373|RL13_HUMAN@142		sp|P43490|NAMPT_HUMAN@444
sp|Q12888|TP53B_HUMAN@1165		sp|Q9BQE3|TBA1C_HUMAN@429		sp|P20700|LMNB1_HUMAN@537
sp|Q9Y2X3|NOP58_HUMAN@85		sp|P05023|AT1A1_HUMAN@680		sp|O00148|DX39A_HUMAN@404
sp|P08865|RSSA_HUMAN@69		sp|P49321|NASP_HUMAN@667		sp|Q9BQG0|MBB1A_HUMAN@290
sp|P17066|HSP76_HUMAN@34		sp|Q92616|GCN1_HUMAN@607		sp|Q9Y5Y2|NUBP2_HUMAN@97
sp|Q9HB58|SP110_HUMAN@198		sp|P17987|TCPA_HUMAN@142		sp|Q969V3|NCLN_HUMAN@55
sp|Q9NZ01|TECR_HUMAN@7		sp|P22314|UBA1_HUMAN@686		sp|A9Z1Z3|FR1L4_HUMAN@461
sp|P16615|AT2A2_HUMAN@656		sp|Q9Y5M8|SRPRB_HUMAN@259		sp|Q15050|RRS1_HUMAN@19
sp|P78527|PRKDC_HUMAN@4035		sp|P54136|SYRC_HUMAN@283		sp|P46013|KI67_HUMAN@1868
sp|P11586|C1TC_HUMAN@823		REV_sp|Q96G61|NUD11_HUMAN@135		sp|Q14974|IMB1_HUMAN@518
sp|Q5IS59|RTN1_PANTR@653		sp|Q16778|H2B2E_HUMAN@114		sp|P62753|RS6_HUMAN@126
sp|P0CG38|POTEI_HUMAN@1061		sp|Q12789|TF3C1_HUMAN@541		sp|P10809|CH60_HUMAN@262
sp|Q14980|NUMA1_HUMAN@953		sp|P78527|PRKDC_HUMAN@2990		sp|Q86V81|THOC4_HUMAN@241
sp|Q9BQG0|MBB1A_HUMAN@1072		sp|Q5JTH9|RRP12_HUMAN@611		sp|Q9Y5V3|MAGD1_HUMAN@1228
sp|Q15365|PCBP1_HUMAN@320		sp|O94776|MTA2_HUMAN@146		sp|O43390|HNRPR_HUMAN@217
sp|P36578|RL4_HUMAN@155		sp|O43837|IDH3B_HUMAN@175		sp|Q08211|DHX9_HUMAN@463
sp|P11586|C1TC_HUMAN@538		sp|Q9UQ35|SRRM2_HUMAN@2457		sp|Q04917|1433F_HUMAN@15
sp|O00400|ACATN_HUMAN@538		sp|P25705|ATPA_HUMAN@208		sp|Q8NEY1|NAV1_HUMAN@1577
sp|Q6ZMN7|PZRN4_HUMAN@56		sp|Q12789|TF3C1_HUMAN@81		sp|Q5VWJ9|SNX30_HUMAN@373
sp|P10809|CH60_HUMAN@492		sp|P49792|RBP2_HUMAN@111		sp|P07900|HS90A_HUMAN@353
sp|P0CG08|GPHRB_HUMAN@190		sp|P54577|SYYC_HUMAN@302		sp|P04075|ALDOA_HUMAN@35
sp|P36578|RL4_HUMAN@297		sp|Q9BVC6|TM109_HUMAN@213		sp|Q9UQR0|SCML2_HUMAN@537
sp|P84103|SRSF3_HUMAN@84		sp|Q9UIG0|BAZ1B_HUMAN@1463		sp|P49327|FAS_HUMAN@2207
sp|Q9H583|HEAT1_HUMAN@1888		sp|P43243|MATR3_HUMAN@262		sp|P22087|FBRL_HUMAN@130
sp|O00767|SCD_HUMAN@206		sp|Q12906|ILF3_HUMAN@118		sp|Q5VTR2|BRE1A_HUMAN@403
sp|Q9P2J5|SYLC_HUMAN@38		sp|Q9Y3E2|BOLA1_HUMAN@50		sp|Q6P996|PDXD1_HUMAN@634
sp|Q9BQE3|TBA1C_HUMAN@120		sp|O75947|ATP5H_HUMAN@93		sp|Q99714|HCD2_HUMAN@48
sp|Q5IFJ7|RL9_MACFA@183		sp|Q13445|TMED1_HUMAN@191		sp|Q6NUQ1|RINT1_HUMAN@286
sp|Q15084|PDIA6_HUMAN@84		sp|P10155|RO60_HUMAN@66		sp|O00116|ADAS_HUMAN@180
sp|Q9UGI8|TES_HUMAN@245		sp|O95292|VAPB_HUMAN@179		sp|P10809|CH60_HUMAN@520
sp|Q12888|TP53B_HUMAN@983		sp|Q8TEX9|IPO4_HUMAN@914		sp|Q29RF7|PDS5A_HUMAN@373
sp|P68371|TBB4B_HUMAN@67		sp|P00338|LDHA_HUMAN@236		sp|P51617|IRAK1_HUMAN@215
sp|P78527|PRKDC_HUMAN@2711		sp|P14618|KPYM_HUMAN@373		sp|Q14974|IMB1_HUMAN@515
sp|O43759|SNG1_HUMAN@142		sp|P62263|RS14_HUMAN@130		sp|Q5SZL2|CE85L_HUMAN@554
sp|P78527|PRKDC_HUMAN@2114		sp|P42166|LAP2A_HUMAN@510		sp|Q9HCK8|CHD8_HUMAN@1539
sp|P13639|EF2_HUMAN@65		sp|Q05639|EF1A2_HUMAN@403		sp|Q9UQ35|SRRM2_HUMAN@1066
sp|P41252|SYIC_HUMAN@811		sp|O95714|HERC2_HUMAN@4794		sp|P35998|PRS7_HUMAN@107
sp|P78527|PRKDC_HUMAN@1050		sp|P19367|HXK1_HUMAN@252		sp|O75431|MTX2_HUMAN@64
sp|P10809|CH60_HUMAN@384		sp|P53985|MOT1_HUMAN@232		sp|Q00839|HNRPU_HUMAN@580
sp|P62750|RL23A_HUMAN@133		sp|Q92878|RAD50_HUMAN@77		sp|P26641|EF1G_HUMAN@408
sp|Q14980|NUMA1_HUMAN@907		sp|O43592|XPOT_HUMAN@642		sp|Q14146|URB2_HUMAN@1046
sp|P23396|RS3_HUMAN@89		sp|Q9NZ01|TECR_HUMAN@5		sp|Q9NRZ9|HELLS_HUMAN@355
sp|P56192|SYMC_HUMAN@382		sp|Q9Y3L5|RAP2C_HUMAN@123		sp|Q9P016|THYN1_HUMAN@36
sp|Q7Z3B4|NUP54_HUMAN@320		sp|Q9BV44|THUM3_HUMAN@447		REV_sp|Q8NHV1|GIMA7_HUMAN@43
sp|P48643|TCPE_HUMAN@138		sp|Q13509|TBB3_HUMAN@74		sp|Q92945|FUBP2_HUMAN@189
sp|P27635|RL10_HUMAN@150		sp|P52272|HNRPM_HUMAN@703		sp|Q9H3M0|KCNF1_HUMAN@158
sp|O43719|HTSF1_HUMAN@484		sp|Q9Y6E2|5MP1_HUMAN@274		sp|Q6PCB5|RSBNL_HUMAN@298
sp|Q8V4V3|RP132_MONPZ@1057		sp|Q8N1F7|NUP93_HUMAN@728		sp|P53007|TXTP_HUMAN@56
sp|Q86UQ4|ABCAD_HUMAN@1254		sp|P52272|HNRPM_HUMAN@523		sp|Q12769|NU160_HUMAN@953
sp|P46459|NSF_HUMAN@312		sp|P46782|RS5_HUMAN@70		sp|P50213|IDH3A_HUMAN@147
sp|P05388|RLA0_HUMAN@23		sp|P23396|RS3_HUMAN@225		sp|P42345|MTOR_HUMAN@670
sp|P78527|PRKDC_HUMAN@240		sp|Q9BQE3|TBA1C_HUMAN@220		sp|P54646|AAPK2_HUMAN@56
sp|P62753|RS6_HUMAN@21		sp|Q9BQG0|MBB1A_HUMAN@709		sp|O96011|PX11B_HUMAN@66
sp|P23396|RS3_HUMAN@31		sp|P16402|H13_HUMAN@43		sp|P05412|JUN_HUMAN@105
sp|P03243|E1B55_ADE05@96		sp|P56182|RRP1_HUMAN@188		sp|O94906|PRP6_HUMAN@584
sp|P10809|CH60_HUMAN@166		sp|P53007|TXTP_HUMAN@57		sp|Q9NVE5|UBP40_HUMAN@82
sp|Q92973|TNPO1_HUMAN@29		sp|Q9Y2X3|NOP58_HUMAN@85		sp|Q9H9E3|COG4_HUMAN@18
sp|P36578|RL4_HUMAN@156		sp|P54136|SYRC_HUMAN@569		sp|Q00610|CLH1_HUMAN@871
sp|O95197|RTN3_HUMAN@907		sp|Q92621|NU205_HUMAN@1844		sp|Q92947|GCDH_HUMAN@365
sp|O60762|DPM1_HUMAN@137		sp|P49411|EFTU_HUMAN@294		sp|P25705|ATPA_HUMAN@537
sp|Q9BQE3|TBA1C_HUMAN@90		sp|P17066|HSP76_HUMAN@34		sp|P49792|RBP2_HUMAN@2586
sp|O00299|CLIC1_HUMAN@130		sp|P16402|H13_HUMAN@75		sp|O00410|IPO5_HUMAN@451
sp|P25398|RS12_HUMAN@125		sp|Q9HB58|SP110_HUMAN@198		sp|Q8N6R0|EFNMT_HUMAN@248
sp|P24752|THIL_HUMAN@99		sp|Q9NZ01|TECR_HUMAN@7		sp|P63261|ACTG_HUMAN@311
sp|P62913|RL11_HUMAN@84		sp|Q01780|EXOSX_HUMAN@107		sp|Q15758|AAAT_HUMAN@209
sp|P62750|RL23A_HUMAN@145		sp|Q9Y3T9|NOC2L_HUMAN@515		sp|O00330|ODPX_HUMAN@388
sp|Q9H9B4|SFXN1_HUMAN@308		sp|Q9Y6G9|DC1L1_HUMAN@317		sp|Q9NU22|MDN1_HUMAN@3052
sp|O15213|WDR46_HUMAN@140		sp|P16615|AT2A2_HUMAN@656		sp|Q4ZG55|GREB1_HUMAN@586
sp|P46778|RL21_HUMAN@41		sp|P21796|VDAC1_HUMAN@36		sp|O15050|TRNK1_HUMAN@1217
sp|Q9H3G5|CPVL_HUMAN@203		sp|P78527|PRKDC_HUMAN@4035		sp|P23396|RS3_HUMAN@216
sp|O14654|IRS4_HUMAN@1078		sp|P11586|C1TC_HUMAN@823		sp|Q5VTE0|EF1A3_HUMAN@268
sp|Q96GQ7|DDX27_HUMAN@333		sp|Q9UGT4|SUSD2_HUMAN@163		sp|Q96AE4|FUBP1_HUMAN@330
sp|Q96ME7|ZN512_HUMAN@542		sp|P62195|PRS8_HUMAN@260		sp|O43159|RRP8_HUMAN@256
sp|Q9Y2X3|NOP58_HUMAN@131		sp|P0CG38|POTEI_HUMAN@1061		REV_sp|Q7Z5P9|MUC19_HUMAN@8367
sp|P36578|RL4_HUMAN@149		sp|P08670|VIME_HUMAN@109		sp|P13861|KAP2_HUMAN@279
sp|P23396|RS3_HUMAN@61		sp|O95373|IPO7_HUMAN@1007		sp|Q96I24|FUBP3_HUMAN@146
sp|Q13428|TCOF_HUMAN@1321		sp|Q9H9B4|SFXN1_HUMAN@53		sp|Q14692|BMS1_HUMAN@722
sp|P10809|CH60_HUMAN@179		sp|P36578|RL4_HUMAN@155		sp|P35610|SOAT1_HUMAN@355
sp|P78527|PRKDC_HUMAN@1907		REV_sp|Q86Y22|CONA1_HUMAN@472		sp|Q13617|CUL2_HUMAN@389
sp|P60468|SC61B_HUMAN@61		sp|P05023|AT1A1_HUMAN@532		sp|Q9Y4W2|LAS1L_HUMAN@310
sp|Q96HS1|PGAM5_HUMAN@79		sp|P49411|EFTU_HUMAN@405		sp|P28838|AMPL_HUMAN@470
sp|Q99623|PHB2_HUMAN@231		sp|P10809|CH60_HUMAN@492		sp|Q5JTH9|RRP12_HUMAN@476
sp|Q9Y5B9|SP16H_HUMAN@794		sp|P49327|FAS_HUMAN@1115		sp|O00567|NOP56_HUMAN@74
sp|P10809|CH60_HUMAN@399		sp|P0CG08|GPHRB_HUMAN@190		sp|P78527|PRKDC_HUMAN@2895
sp|P16615|AT2A2_HUMAN@659		sp|P36578|RL4_HUMAN@297		sp|Q53GS7|GLE1_HUMAN@564
sp|P24752|THIL_HUMAN@186		sp|P27348|1433T_HUMAN@40		sp|P08670|VIME_HUMAN@106
sp|P56182|RRP1_HUMAN@346		sp|P04406|G3P_HUMAN@223		sp|Q8N257|H2B3B_HUMAN@106
sp|Q01650|LAT1_HUMAN@42		sp|P84103|SRSF3_HUMAN@84		REV_sp|Q03001|DYST_HUMAN@6727
sp|Q96JI7|SPTCS_HUMAN@2030		sp|P08708|RS17_HUMAN@76		sp|P06576|ATPB_HUMAN@399
sp|P67775|PP2AA_HUMAN@47		sp|Q9H583|HEAT1_HUMAN@1888		sp|P06733|ENOA_HUMAN@278
sp|Q99623|PHB2_HUMAN@229		sp|P62701|RS4X_HUMAN@251		sp|Q9UHR5|S30BP_HUMAN@58
sp|P84103|SRSF3_HUMAN@52		sp|P24539|AT5F1_HUMAN@136		sp|P45974|UBP5_HUMAN@297
sp|P35998|PRS7_HUMAN@292		sp|Q5SQN1|SNP47_HUMAN@366		sp|P07947|YES_HUMAN@425
sp|P62241|RS8_HUMAN@70		sp|O95299|NDUAA_HUMAN@349		sp|Q9HBK9|AS3MT_HUMAN@352
sp|P05023|AT1A1_HUMAN@223		sp|Q6SW77|DPOL_HCMVM@775		sp|Q9P253|VPS18_HUMAN@40
sp|P17655|CAN2_HUMAN@613		sp|P78527|PRKDC_HUMAN@3831		sp|P23396|RS3_HUMAN@169
sp|Q9BQG0|MBB1A_HUMAN@242		sp|Q9BQE3|TBA1C_HUMAN@120		sp|Q5VTE0|EF1A3_HUMAN@403
sp|P27635|RL10_HUMAN@187		sp|Q15084|PDIA6_HUMAN@84		sp|Q13308|PTK7_HUMAN@633
sp|Q14204|DYHC1_HUMAN@4259		sp|Q5IFJ7|RL9_MACFA@183		sp|Q9UBB4|ATX10_HUMAN@299
sp|P10809|CH60_HUMAN@416		sp|Q9UGI8|TES_HUMAN@245		sp|Q9H583|HEAT1_HUMAN@1536
sp|P53396|ACLY_HUMAN@146		sp|Q12888|TP53B_HUMAN@983		sp|O75044|SRGP2_HUMAN@1066
sp|Q00839|HNRPU_HUMAN@437		sp|O60763|USO1_HUMAN@668		sp|P62249|RS16_HUMAN@43
sp|P10809|CH60_HUMAN@347		sp|P78527|PRKDC_HUMAN@2711		sp|Q9HAV4|XPO5_HUMAN@702
sp|P17152|TMM11_HUMAN@70		sp|P23396|RS3_HUMAN@68		sp|Q8TCG1|CIP2A_HUMAN@477
sp|Q14566|MCM6_HUMAN@240		sp|P78527|PRKDC_HUMAN@2114		sp|O75153|CLU_HUMAN@337
sp|Q66LE6|2ABD_HUMAN@413		sp|O43759|SNG1_HUMAN@142		sp|Q71UI9|H2AV_HUMAN@96
sp|P62241|RS8_HUMAN@89		sp|P68371|TBB4B_HUMAN@67		sp|Q8NE71|ABCF1_HUMAN@597
sp|P55060|XPO2_HUMAN@838		sp|P17987|TCPA_HUMAN@68		sp|P20839|IMDH1_HUMAN@196
sp|P42695|CNDD3_HUMAN@539		sp|P78527|PRKDC_HUMAN@1050		sp|P12004|PCNA_HUMAN@109
sp|Q9BQE3|TBA1C_HUMAN@47		sp|Q8NAF0|ZN579_HUMAN@426		sp|Q969V3|NCLN_HUMAN@71
sp|Q9Y2X3|NOP58_HUMAN@322		sp|Q9UIA9|XPO7_HUMAN@81		sp|O14727|APAF_HUMAN@210
sp|P05023|AT1A1_HUMAN@717		sp|P10809|CH60_HUMAN@384		sp|P52272|HNRPM_HUMAN@502
sp|P07900|HS90A_HUMAN@199		sp|P12268|IMDH2_HUMAN@196		sp|B2RTY4|MYO9A_HUMAN@349
sp|Q12906|ILF3_HUMAN@298		sp|P23396|RS3_HUMAN@89		sp|P49327|FAS_HUMAN@1750
sp|P07814|SYEP_HUMAN@1394		sp|P22626|ROA2_HUMAN@142		sp|Q86WJ1|CHD1L_HUMAN@228
sp|P56192|SYMC_HUMAN@806		sp|P56192|SYMC_HUMAN@382		sp|Q14008|CKAP5_HUMAN@631
sp|P78527|PRKDC_HUMAN@4101		sp|Q7Z3B4|NUP54_HUMAN@320		sp|Q9UQ88|CD11A_HUMAN@433
sp|Q06830|PRDX1_HUMAN@167		sp|P07355|ANXA2_HUMAN@16		sp|P35250|RFC2_HUMAN@142
sp|Q14204|DYHC1_HUMAN@1984		sp|P48643|TCPE_HUMAN@138		sp|Q14146|URB2_HUMAN@260
sp|P05023|AT1A1_HUMAN@636		sp|P27635|RL10_HUMAN@150		sp|Q8TF05|PP4R1_HUMAN@170
sp|P51991|ROA3_HUMAN@30		sp|Q99623|PHB2_HUMAN@233		sp|P03072|LT_POVJC@430
sp|Q14204|DYHC1_HUMAN@1886		sp|Q8V4V3|RP132_MONPZ@1057		sp|P55795|HNRH2_HUMAN@320
sp|Q02878|RL6_HUMAN@231		sp|P62333|PRS10_HUMAN@147		sp|Q16795|NDUA9_HUMAN@365
sp|Q9Y5L4|TIM13_HUMAN@37		sp|Q9NY27|PP4R2_HUMAN@379		sp|Q92945|FUBP2_HUMAN@377
sp|Q96EY8|MMAB_HUMAN@204		sp|P05388|RLA0_HUMAN@23		sp|Q8IZD4|DCP1B_HUMAN@287
sp|Q86VP6|CAND1_HUMAN@813		sp|P78527|PRKDC_HUMAN@240		sp|Q12789|TF3C1_HUMAN@1770
sp|Q12931|TRAP1_HUMAN@394		sp|Q9HCC0|MCCB_HUMAN@412		sp|Q13257|MD2L1_HUMAN@126
sp|P63261|ACTG_HUMAN@244		sp|P62753|RS6_HUMAN@21		sp|Q9Y5P4|CERT_HUMAN@124
sp|Q9UG63|ABCF2_HUMAN@612		sp|P04632|CPNS1_HUMAN@184		sp|P61978|HNRPK_HUMAN@416
sp|Q14204|DYHC1_HUMAN@2842		sp|P36578|RL4_HUMAN@288		sp|Q6P2E9|EDC4_HUMAN@969
sp|O43929|ORC4_HUMAN@242		sp|P03243|E1B55_ADE05@96		sp|P53985|MOT1_HUMAN@414
sp|P68371|TBB4B_HUMAN@53		REV_sp|Q8TF21|ANR24_HUMAN@340		sp|Q9UHR4|BI2L1_HUMAN@13
sp|P0DPI2|GAL3A_HUMAN@224		sp|P78347|GTF2I_HUMAN@18		sp|P62888|RL30_HUMAN@114
sp|Q13561|DCTN2_HUMAN@235		REV_sp|Q9NZL4|HPBP1_HUMAN@272		sp|Q86U38|NOP9_HUMAN@635
sp|Q92766|RREB1_HUMAN@382		sp|P08238|HS90B_HUMAN@627		sp|O43264|ZW10_HUMAN@313
sp|P20537|PG042_VACCC@93		sp|P63261|ACTG_HUMAN@224		sp|P78371|TCPB_HUMAN@392
sp|Q9ULA0|DNPEP_HUMAN@161		sp|P10809|CH60_HUMAN@166		sp|P53621|COPA_HUMAN@178
sp|O96008|TOM40_HUMAN@92		sp|Q92973|TNPO1_HUMAN@29		sp|O14980|XPO1_HUMAN@683
sp|Q9UJW0|DCTN4_HUMAN@241		sp|O60762|DPM1_HUMAN@137		REV_sp|Q13136|LIPA1_HUMAN@828
sp|Q9BXW7|HDHD5_HUMAN@335		sp|O95197|RTN3_HUMAN@907		sp|P62277|RS13_HUMAN@83
sp|Q9H9B4|SFXN1_HUMAN@210		sp|P36578|RL4_HUMAN@156		sp|Q08AM6|VAC14_HUMAN@34
sp|P27635|RL10_HUMAN@66		sp|P52272|HNRPM_HUMAN@435		sp|P78527|PRKDC_HUMAN@3706
sp|P22087|FBRL_HUMAN@129		sp|P40227|TCPZ_HUMAN@146		sp|O95831|AIFM1_HUMAN@254
sp|P18583|SON_HUMAN@1571		sp|P46459|NSF_HUMAN@310		sp|P40938|RFC3_HUMAN@257
sp|P15880|RS2_HUMAN@258		sp|Q9BQE3|TBA1C_HUMAN@90		sp|P49189|AL9A1_HUMAN@254
sp|P51648|AL3A2_HUMAN@207		sp|Q13162|PRDX4_HUMAN@227		sp|Q6YN16|HSDL2_HUMAN@293
sp|P62266|RS23_HUMAN@114		sp|Q00325|S25A3_HUMAN@349		sp|O15371|EIF3D_HUMAN@44
sp|P12268|IMDH2_HUMAN@117		sp|Q969Q0|RL36L_HUMAN@96		sp|P39023|RL3_HUMAN@306
sp|Q9BXW7|HDHD5_HUMAN@339		sp|P62805|H4_HUMAN@53		sp|O00567|NOP56_HUMAN@233
sp|P61978|HNRPK_HUMAN@131		sp|P25398|RS12_HUMAN@125		sp|O95299|NDUAA_HUMAN@251
sp|P40429|RL13A_HUMAN@158		sp|P51148|RAB5C_HUMAN@186		sp|O60313|OPA1_HUMAN@487
sp|O43175|SERA_HUMAN@86		sp|P24752|THIL_HUMAN@99		sp|P25705|ATPA_HUMAN@69
sp|O75947|ATP5H_HUMAN@94		sp|Q15003|CND2_HUMAN@234		sp|Q86U90|YRDC_HUMAN@22
sp|Q9Y6V7|DDX49_HUMAN@406		sp|P62913|RL11_HUMAN@84		sp|P11388|TOP2A_HUMAN@446
sp|P07900|HS90A_HUMAN@288		sp|Q15365|PCBP1_HUMAN@41		sp|P53618|COPB_HUMAN@609
sp|P43490|NAMPT_HUMAN@444		sp|Q9H9B4|SFXN1_HUMAN@308		sp|P30154|2AAB_HUMAN@36
sp|Q96HS1|PGAM5_HUMAN@82		sp|Q9NS69|TOM22_HUMAN@109		sp|Q6A163|K1C39_HUMAN@180
sp|Q00839|HNRPU_HUMAN@358		sp|P46778|RL21_HUMAN@41		sp|Q6UB35|C1TM_HUMAN@197
sp|Q8N2K0|ABD12_HUMAN@13		sp|P11021|BIP_HUMAN@622		sp|Q14204|DYHC1_HUMAN@667
sp|P78527|PRKDC_HUMAN@23		sp|P23528|COF1_HUMAN@51		sp|Q14807|KIF22_HUMAN@309
sp|O95235|KI20A_HUMAN@759		sp|O14654|IRS4_HUMAN@1078		sp|Q9NVN8|GNL3L_HUMAN@193
sp|P56192|SYMC_HUMAN@385		sp|Q8IVF1|NTM2A_HUMAN@620		sp|P16615|AT2A2_HUMAN@646
sp|Q14980|NUMA1_HUMAN@954		sp|Q96GQ7|DDX27_HUMAN@333		sp|P09622|DLDH_HUMAN@115
sp|P12268|IMDH2_HUMAN@183		sp|Q9Y2X3|NOP58_HUMAN@233		sp|Q29RF7|PDS5A_HUMAN@128
sp|P62857|RS28_HUMAN@60		sp|Q96ME7|ZN512_HUMAN@542		sp|Q7KZF4|SND1_HUMAN@647
sp|O94966|UBP19_HUMAN@1190		sp|Q9Y2X3|NOP58_HUMAN@131		sp|Q9BPX3|CND3_HUMAN@706
sp|Q14690|RRP5_HUMAN@501		sp|Q9NSE4|SYIM_HUMAN@328		sp|Q9Y5S9|RBM8A_HUMAN@107
sp|P78527|PRKDC_HUMAN@1496		sp|P36578|RL4_HUMAN@149		sp|Q9Y3T9|NOC2L_HUMAN@82
sp|P60228|EIF3E_HUMAN@87		sp|O95573|ACSL3_HUMAN@554		sp|P17987|TCPA_HUMAN@434
sp|Q6YN16|HSDL2_HUMAN@312		sp|P23396|RS3_HUMAN@61		sp|Q9Y520|PRC2C_HUMAN@192
REV_sp|Q709C8|VP13C_HUMAN@849		sp|P17987|TCPA_HUMAN@479		sp|Q6YHU6|THADA_HUMAN@1577
sp|P09874|PARP1_HUMAN@491		sp|P08238|HS90B_HUMAN@636		sp|O60264|SMCA5_HUMAN@537
sp|P78527|PRKDC_HUMAN@1864		sp|O94776|MTA2_HUMAN@156		sp|Q6UB35|C1TM_HUMAN@595
sp|P83731|RL24_HUMAN@65		sp|P06748|NPM_HUMAN@36		sp|P83436|COG7_HUMAN@308
sp|P02545|LMNA_HUMAN@448		sp|Q13428|TCOF_HUMAN@1321		sp|P46100|ATRX_HUMAN@1819
sp|P07195|LDHB_HUMAN@313		sp|P10809|CH60_HUMAN@179		sp|Q8N201|INT1_HUMAN@1040
sp|Q8NI36|WDR36_HUMAN@858		REV_sp|Q8NF91|SYNE1_HUMAN@6555		sp|P13929|ENOB_HUMAN@45
sp|P10809|CH60_HUMAN@262		sp|P60468|SC61B_HUMAN@61		sp|Q15061|WDR43_HUMAN@386
sp|P00338|LDHA_HUMAN@312		sp|P07954|FUMH_HUMAN@362		sp|P78527|PRKDC_HUMAN@2699
sp|Q1KMD3|HNRL2_HUMAN@600		sp|P11908|PRPS2_HUMAN@39		sp|P12236|ADT3_HUMAN@11
sp|P78527|PRKDC_HUMAN@3824		sp|Q99623|PHB2_HUMAN@231		sp|Q9BYG3|MK67I_HUMAN@225
sp|P62280|RS11_HUMAN@57		sp|P10809|CH60_HUMAN@399		sp|Q6KC79|NIPBL_HUMAN@1611
sp|P55060|XPO2_HUMAN@375		sp|P16615|AT2A2_HUMAN@659		sp|O95202|LETM1_HUMAN@365
sp|P18621|RL17_HUMAN@9		sp|P24752|THIL_HUMAN@186		sp|P25786|PSA1_HUMAN@255
sp|Q15181|IPYR_HUMAN@271		sp|O95573|ACSL3_HUMAN@552		sp|Q9H4L4|SENP3_HUMAN@187
sp|P61313|RL15_HUMAN@104		sp|O75369|FLNB_HUMAN@1911		sp|Q92621|NU205_HUMAN@88
sp|P22087|FBRL_HUMAN@216		sp|P56182|RRP1_HUMAN@346		sp|O00567|NOP56_HUMAN@225
sp|P07900|HS90A_HUMAN@353		sp|Q96HS1|PGAM5_HUMAN@83		sp|P61758|PFD3_HUMAN@12
sp|P61313|RL15_HUMAN@103		sp|Q01650|LAT1_HUMAN@42		sp|P49327|FAS_HUMAN@378
sp|P49411|EFTU_HUMAN@103		sp|Q96JI7|SPTCS_HUMAN@2030		sp|Q7L1Q6|5MP2_HUMAN@144
sp|Q14566|MCM6_HUMAN@234		sp|P26641|EF1G_HUMAN@407		sp|O95490|AGRL2_HUMAN@811
sp|P63261|ACTG_HUMAN@57		sp|P67775|PP2AA_HUMAN@47		sp|Q02241|KIF23_HUMAN@319
sp|P52272|HNRPM_HUMAN@509		sp|P84103|SRSF3_HUMAN@52		sp|Q13895|BYST_HUMAN@420
sp|P49327|FAS_HUMAN@2207		sp|Q99623|PHB2_HUMAN@229		sp|P22626|ROA2_HUMAN@195
sp|P62753|RS6_HUMAN@17		sp|P35998|PRS7_HUMAN@292		sp|Q15046|SYK_HUMAN@92
sp|P03243|E1B55_ADE05@95		sp|P62241|RS8_HUMAN@70		sp|Q13155|AIMP2_HUMAN@46
sp|Q9UMS0|NFU1_HUMAN@188		sp|P23396|RS3_HUMAN@20		sp|Q96T51|RUFY1_HUMAN@348
sp|P0DMV9|HS71B_HUMAN@530		sp|P05023|AT1A1_HUMAN@223		sp|Q96M86|DNHD1_HUMAN@949
sp|Q9Y2X3|NOP58_HUMAN@229		sp|P06733|ENOA_HUMAN@88		sp|P50991|TCPD_HUMAN@534
sp|Q13509|TBB3_HUMAN@111		sp|P62753|RS6_HUMAN@20		sp|O15355|PPM1G_HUMAN@123
sp|P62857|RS28_HUMAN@52		sp|Q96QU8|XPO6_HUMAN@162		sp|Q86VI1|EX3L1_HUMAN@665
sp|P63261|ACTG_HUMAN@205		sp|P53365|ARFP2_HUMAN@243		sp|Q9Y2W3|S45A1_HUMAN@260
sp|Q9Y2X3|NOP58_HUMAN@82		sp|P25705|ATPA_HUMAN@70		sp|Q02978|M2OM_HUMAN@113
sp|P0C7V7|SC11B_HUMAN@61		sp|Q9BQG0|MBB1A_HUMAN@242		sp|Q13885|TBB2A_HUMAN@128
sp|Q03252|LMNB2_HUMAN@209		sp|P27635|RL10_HUMAN@187		sp|Q14257|RCN2_HUMAN@49
sp|Q13509|TBB3_HUMAN@157		sp|Q14204|DYHC1_HUMAN@4259		sp|P78527|PRKDC_HUMAN@2935
sp|O95299|NDUAA_HUMAN@346		sp|P58546|MTPN_HUMAN@26		sp|P42677|RS27_HUMAN@34
sp|Q16822|PCKGM_HUMAN@204		sp|P04181|OAT_HUMAN@41		sp|Q96E39|RMXL1_HUMAN@312
sp|P11586|C1TC_HUMAN@205		sp|P12004|PCNA_HUMAN@115		sp|P50991|TCPD_HUMAN@429
sp|O00116|ADAS_HUMAN@180		sp|P10809|CH60_HUMAN@416		sp|P0DMV9|HS71B_HUMAN@523
sp|P42167|LAP2B_HUMAN@379		sp|P08708|RS17_HUMAN@36		sp|Q5SW79|CE170_HUMAN@774
sp|Q00839|HNRPU_HUMAN@630		sp|P50991|TCPD_HUMAN@156		sp|P62277|RS13_HUMAN@56
sp|P10809|CH60_HUMAN@520		sp|P53396|ACLY_HUMAN@146		sp|P78527|PRKDC_HUMAN@3427
sp|Q13509|TBB3_HUMAN@295		sp|Q00839|HNRPU_HUMAN@437		sp|Q5TEC6|H37_HUMAN@78
sp|P22314|UBA1_HUMAN@813		sp|P10809|CH60_HUMAN@347		sp|P52701|MSH6_HUMAN@1310
sp|P22087|FBRL_HUMAN@215		sp|O14654|IRS4_HUMAN@1109		sp|P11586|C1TC_HUMAN@158
sp|P07355|ANXA2_HUMAN@14		sp|P17152|TMM11_HUMAN@70		sp|Q7L1Q6|5MP2_HUMAN@383
sp|P08559|ODPA_HUMAN@133		sp|Q14566|MCM6_HUMAN@240		REV_sp|Q05BV3|EMAL5_HUMAN@293
sp|P05388|RLA0_HUMAN@70		sp|P11142|HSP7C_HUMAN@231		sp|Q9Y262|EIF3L_HUMAN@151
sp|Q7Z4Q2|HEAT3_HUMAN@53		sp|Q9NU22|MDN1_HUMAN@1488		sp|O00303|EIF3F_HUMAN@301
sp|P25705|ATPA_HUMAN@139		sp|P62241|RS8_HUMAN@89		sp|Q9Y3L5|RAP2C_HUMAN@121
sp|Q9Y678|COPG1_HUMAN@36		sp|Q8WZ42|TITIN_HUMAN@32157		sp|Q7L4E1|MIGA2_HUMAN@365
sp|Q9BQE3|TBA1C_HUMAN@77		sp|P55060|XPO2_HUMAN@838		sp|P06576|ATPB_HUMAN@391
sp|P50416|CPT1A_HUMAN@289		sp|Q92973|TNPO1_HUMAN@334		REV_sp|Q15643|TRIPB_HUMAN@510
sp|P08238|HS90B_HUMAN@501		sp|P42695|CNDD3_HUMAN@539		sp|P11310|ACADM_HUMAN@253
sp|P11586|C1TC_HUMAN@526		sp|Q8N9T8|KRI1_HUMAN@593		sp|Q99873|ANM1_HUMAN@241
sp|Q00839|HNRPU_HUMAN@580		sp|Q9Y2X3|NOP58_HUMAN@322		sp|P52701|MSH6_HUMAN@544
sp|P05023|AT1A1_HUMAN@533		sp|P17812|PYRG1_HUMAN@582		sp|Q03393|PTPS_HUMAN@33
sp|Q03252|LMNB2_HUMAN@262		sp|P49915|GUAA_HUMAN@11		sp|P46013|KI67_HUMAN@283
sp|Q9ULE4|F184B_HUMAN@353		sp|P05023|AT1A1_HUMAN@717		sp|Q9H3U5|MFSD1_HUMAN@18
sp|P30048|PRDX3_HUMAN@227		sp|P07900|HS90A_HUMAN@199		sp|P52272|HNRPM_HUMAN@542
sp|P78527|PRKDC_HUMAN@2209		sp|Q12906|ILF3_HUMAN@298		sp|Q12789|TF3C1_HUMAN@541
sp|Q9Y4X4|KLF12_HUMAN@216		sp|P55957|BID_HUMAN@80		sp|Q9UH62|ARMX3_HUMAN@85
sp|Q01581|HMCS1_HUMAN@95		sp|Q9UKU7|ACAD8_HUMAN@343		sp|Q9UPU5|UBP24_HUMAN@430
sp|P05023|AT1A1_HUMAN@642		sp|P56192|SYMC_HUMAN@806		sp|Q92616|GCN1_HUMAN@1789
sp|P40937|RFC5_HUMAN@193		sp|P78527|PRKDC_HUMAN@4101		sp|P18583|SON_HUMAN@76
sp|Q9H4I3|TRABD_HUMAN@283		sp|P62917|RL8_HUMAN@36		sp|Q01484|ANK2_HUMAN@2138
sp|P62937|PPIA_HUMAN@86		sp|P07814|SYEP_HUMAN@1394		sp|P07910|HNRPC_HUMAN@236
sp|O43175|SERA_HUMAN@387		sp|Q14204|DYHC1_HUMAN@1706		sp|P50991|TCPD_HUMAN@135
sp|Q9BRX8|PXL2A_HUMAN@90		sp|Q14008|CKAP5_HUMAN@1656		sp|Q15365|PCBP1_HUMAN@304
sp|P56192|SYMC_HUMAN@808		sp|Q06830|PRDX1_HUMAN@167		sp|Q13445|TMED1_HUMAN@191
sp|P00338|LDHA_HUMAN@221		sp|Q9UK61|TASOR_HUMAN@621		sp|P50570|DYN2_HUMAN@355
sp|P35613|BASI_HUMAN@352		sp|O00244|ATOX1_HUMAN@9		sp|Q13541|4EBP1_HUMAN@33
sp|P62241|RS8_HUMAN@135		sp|Q9BVA1|TBB2B_HUMAN@327		sp|Q9Y5B9|SP16H_HUMAN@499
sp|Q13509|TBB3_HUMAN@158		sp|P05023|AT1A1_HUMAN@636		sp|Q9Y2R0|COA3_HUMAN@42
sp|O60264|SMCA5_HUMAN@169		sp|Q14204|DYHC1_HUMAN@1984		sp|P02786|TFR1_HUMAN@44
sp|Q9BXJ9|NAA15_HUMAN@819		sp|P51991|ROA3_HUMAN@30		sp|Q15758|AAAT_HUMAN@515
sp|P49368|TCPG_HUMAN@388		sp|Q14204|DYHC1_HUMAN@1886		sp|P78527|PRKDC_HUMAN@3619
sp|Q12769|NU160_HUMAN@953		sp|Q3ZCQ8|TIM50_HUMAN@321		sp|Q7L1Q6|5MP2_HUMAN@310
sp|P17066|HSP76_HUMAN@50		sp|Q02878|RL6_HUMAN@231		sp|Q9BVP2|GNL3_HUMAN@430
sp|P07437|TBB5_HUMAN@288		sp|Q96EY8|MMAB_HUMAN@204		sp|P06733|ENOA_HUMAN@414
sp|P49411|EFTU_HUMAN@320		sp|Q86VP6|CAND1_HUMAN@813		sp|P11172|UMPS_HUMAN@148
sp|Q92973|TNPO1_HUMAN@332		sp|Q9Y5L4|TIM13_HUMAN@37		sp|P49411|EFTU_HUMAN@266
sp|Q9UPN3|MACF1_HUMAN@36		sp|Q12931|TRAP1_HUMAN@394		sp|Q02880|TOP2B_HUMAN@592
sp|Q16822|PCKGM_HUMAN@338		sp|P63261|ACTG_HUMAN@244		sp|O60832|DKC1_HUMAN@164
sp|P07195|LDHB_HUMAN@177		sp|Q14204|DYHC1_HUMAN@2842		sp|P46783|RS10_HUMAN@110
sp|P78527|PRKDC_HUMAN@17		sp|P62750|RL23A_HUMAN@120		sp|Q13530|SERC3_HUMAN@86
sp|P49411|EFTU_HUMAN@104		sp|P62937|PPIA_HUMAN@84		sp|A6NDU8|RIMC1_HUMAN@274
sp|P51570|GALK1_HUMAN@257		sp|Q9UG63|ABCF2_HUMAN@612		sp|P19338|NUCL_HUMAN@414
sp|Q14690|RRP5_HUMAN@451		sp|P68371|TBB4B_HUMAN@53		sp|A6NMY6|AXA2L_HUMAN@36
sp|Q08211|DHX9_HUMAN@455		sp|P0DPI2|GAL3A_HUMAN@224		sp|P42285|MTREX_HUMAN@1020
sp|P11310|ACADM_HUMAN@58		sp|Q13561|DCTN2_HUMAN@235		sp|O94888|UBXN7_HUMAN@279
sp|P07437|TBB5_HUMAN@295		sp|Q92766|RREB1_HUMAN@382		sp|P49368|TCPG_HUMAN@255
sp|Q86UQ4|ABCAD_HUMAN@635		sp|Q96ER9|MITOK_HUMAN@328		sp|O75569|PRKRA_HUMAN@14
sp|P78527|PRKDC_HUMAN@4093		sp|Q9ULA0|DNPEP_HUMAN@161		sp|Q6P2E9|EDC4_HUMAN@999
sp|P17812|PYRG1_HUMAN@505		sp|Q9UJW0|DCTN4_HUMAN@241		sp|P57678|GEMI4_HUMAN@194
sp|Q9Y5B9|SP16H_HUMAN@798		sp|Q9BXW7|HDHD5_HUMAN@335		sp|O95373|IPO7_HUMAN@93
sp|Q9Y285|SYFA_HUMAN@498		sp|Q9H9B4|SFXN1_HUMAN@210		sp|Q92544|TM9S4_HUMAN@492
sp|Q9Y5B9|SP16H_HUMAN@793		sp|P22087|FBRL_HUMAN@129		sp|O60763|USO1_HUMAN@668
sp|P10809|CH60_HUMAN@108		sp|P15880|RS2_HUMAN@258		sp|Q86TM6|SYVN1_HUMAN@75
sp|P53701|CCHL_HUMAN@140		sp|Q96G46|DUS3L_HUMAN@429		sp|Q9BUF5|TBB6_HUMAN@157
sp|P18085|ARF4_HUMAN@106		sp|P16615|AT2A2_HUMAN@340		sp|P54136|SYRC_HUMAN@358
sp|Q9P2X0|DPM3_HUMAN@73		sp|P51648|AL3A2_HUMAN@207		sp|P14618|KPYM_HUMAN@300
sp|P50402|EMD_HUMAN@220		sp|P07195|LDHB_HUMAN@15		sp|Q9HCC0|MCCB_HUMAN@412
sp|P05023|AT1A1_HUMAN@238		sp|P62266|RS23_HUMAN@114		sp|Q15233|NONO_HUMAN@183
sp|P78527|PRKDC_HUMAN@3460		sp|P12268|IMDH2_HUMAN@117		sp|Q86V48|LUZP1_HUMAN@964
sp|Q9NY93|DDX56_HUMAN@342		sp|O96028|NSD2_HUMAN@272		sp|O00161|SNP23_HUMAN@57
sp|P50763|VE1_HPV28@262		sp|P61978|HNRPK_HUMAN@131		REV_sp|O92531|POLG_HCVVO@390
sp|P55060|XPO2_HUMAN@378		sp|P40429|RL13A_HUMAN@158		sp|Q76FK4|NOL8_HUMAN@505
sp|P50990|TCPQ_HUMAN@159		sp|O43175|SERA_HUMAN@86		sp|Q9UQB3|CTND2_HUMAN@81
sp|P49411|EFTU_HUMAN@204		sp|Q9BXW7|HDHD5_HUMAN@339		sp|O75150|BRE1B_HUMAN@872
sp|P51153|RAB13_HUMAN@115		sp|O75947|ATP5H_HUMAN@94		sp|Q9H223|EHD4_HUMAN@205
sp|P62851|RS25_HUMAN@75		sp|O95299|NDUAA_HUMAN@120		sp|Q9NZI8|IF2B1_HUMAN@275
sp|P62753|RS6_HUMAN@19		sp|P30519|HMOX2_HUMAN@247		sp|Q14690|RRP5_HUMAN@502
sp|Q9BQE3|TBA1C_HUMAN@279		sp|Q96HS1|PGAM5_HUMAN@82		sp|P35237|SPB6_HUMAN@266
sp|Q9UBF2|COPG2_HUMAN@36		sp|Q00839|HNRPU_HUMAN@358		sp|P23396|RS3_HUMAN@61
sp|P10809|CH60_HUMAN@35		sp|Q8N2K0|ABD12_HUMAN@13		sp|P11021|BIP_HUMAN@550
sp|Q96MC5|MERB1_HUMAN@137		sp|P78527|PRKDC_HUMAN@23		sp|Q53GQ0|DHB12_HUMAN@112
sp|P50914|RL14_HUMAN@8		sp|P13797|PLST_HUMAN@16		sp|P60468|SC61B_HUMAN@61
sp|P10809|CH60_HUMAN@111		sp|P40938|RFC3_HUMAN@70		sp|P78537|BL1S1_HUMAN@123
sp|Q99497|PARK7_HUMAN@18		sp|P56192|SYMC_HUMAN@385		sp|O43808|PM34_HUMAN@240
REV_sp|P16818|UL61_HCMVA@230		sp|Q13509|TBB3_HUMAN@67		sp|Q9Y483|MTF2_HUMAN@47
sp|O00244|ATOX1_HUMAN@17		sp|Q96L73|NSD1_HUMAN@1859		sp|Q7L1Q6|5MP2_HUMAN@315
sp|P08195|4F2_HUMAN@154		sp|Q14980|NUMA1_HUMAN@954		sp|Q9Y4X0|AMMR1_HUMAN@43
sp|P00338|LDHA_HUMAN@313		sp|Q9BQG0|MBB1A_HUMAN@290		sp|Q14204|DYHC1_HUMAN@854
sp|P63261|ACTG_HUMAN@316		sp|P46783|RS10_HUMAN@37		sp|Q9HAV4|XPO5_HUMAN@691
sp|Q13509|TBB3_HUMAN@69		sp|P12268|IMDH2_HUMAN@183		sp|P08670|VIME_HUMAN@211
sp|P10809|CH60_HUMAN@379		sp|Q07955|SRSF1_HUMAN@68		sp|Q9UHV9|PFD2_HUMAN@80
sp|P35998|PRS7_HUMAN@294		sp|Q8NC56|LEMD2_HUMAN@345		sp|Q02878|RL6_HUMAN@119
sp|P62241|RS8_HUMAN@163		sp|Q9BQG0|MBB1A_HUMAN@14		sp|Q9UBL3|ASH2L_HUMAN@356
sp|P06748|NPM_HUMAN@39		sp|P62857|RS28_HUMAN@60		sp|Q9H845|ACAD9_HUMAN@80
sp|P18621|RL17_HUMAN@31		sp|O94966|UBP19_HUMAN@1190		sp|Q14566|MCM6_HUMAN@240
sp|P31943|HNRH1_HUMAN@320		sp|P78347|GTF2I_HUMAN@15		sp|P55060|XPO2_HUMAN@838
sp|P53985|MOT1_HUMAN@225		sp|P78527|PRKDC_HUMAN@1496		sp|P49915|GUAA_HUMAN@11
sp|P23396|RS3_HUMAN@216		sp|P08708|RS17_HUMAN@77		sp|Q13257|MD2L1_HUMAN@127
sp|Q13885|TBB2A_HUMAN@325		sp|P60228|EIF3E_HUMAN@87		sp|P04637|P53_HUMAN@286
sp|O43747|AP1G1_HUMAN@352		sp|Q6YN16|HSDL2_HUMAN@312		sp|P05023|AT1A1_HUMAN@636
sp|Q9Y2X3|NOP58_HUMAN@91		sp|Q14684|RRP1B_HUMAN@183		sp|Q9H2V7|SPNS1_HUMAN@45
sp|O14654|IRS4_HUMAN@1081		sp|P23246|SFPQ_HUMAN@406		sp|Q53R41|FAKD1_HUMAN@783
sp|P78527|PRKDC_HUMAN@3700		sp|P02545|LMNA_HUMAN@448		sp|P16615|AT2A2_HUMAN@351
sp|P17066|HSP76_HUMAN@233		sp|P78527|PRKDC_HUMAN@1864		sp|Q14247|SRC8_HUMAN@93
sp|P10809|CH60_HUMAN@167		sp|P09874|PARP1_HUMAN@491		sp|Q86XI2|CNDG2_HUMAN@638
sp|O00567|NOP56_HUMAN@222		sp|P07195|LDHB_HUMAN@313		sp|Q9Y6R4|M3K4_HUMAN@1390
sp|Q07812|BAX_HUMAN@75		sp|Q12931|TRAP1_HUMAN@263		sp|Q9NU22|MDN1_HUMAN@232
sp|Q9BQE3|TBA1C_HUMAN@116		sp|Q8NI36|WDR36_HUMAN@858		sp|P22087|FBRL_HUMAN@129
sp|O43242|PSMD3_HUMAN@435		sp|Q6ZMW3|EMAL6_HUMAN@1857		sp|Q8WTT2|NOC3L_HUMAN@786
sp|P17987|TCPA_HUMAN@66		sp|P10809|CH60_HUMAN@262		sp|P35612|ADDB_HUMAN@193
sp|P52701|MSH6_HUMAN@1023		sp|P00338|LDHA_HUMAN@312		sp|P07900|HS90A_HUMAN@288
sp|Q9HCC0|MCCB_HUMAN@414		sp|Q00701|P100_HHV6U@29		sp|Q8NG68|TTL_HUMAN@235
sp|P78527|PRKDC_HUMAN@2537		sp|Q9Y2X3|NOP58_HUMAN@228		sp|P78527|PRKDC_HUMAN@23
sp|O00541|PESC_HUMAN@257		sp|Q1KMD3|HNRL2_HUMAN@600		sp|Q8IWY9|CDAN1_HUMAN@1003
sp|P11172|UMPS_HUMAN@154		sp|P78527|PRKDC_HUMAN@3824		sp|Q00839|HNRPU_HUMAN@568
sp|P62269|RS18_HUMAN@65		sp|P04844|RPN2_HUMAN@452		sp|P78527|PRKDC_HUMAN@1496
sp|Q9P2X3|IMPCT_HUMAN@168		sp|P05023|AT1A1_HUMAN@892		sp|Q5T2T1|MPP7_HUMAN@251
sp|Q96RL7|VP13A_HUMAN@1548		sp|O43175|SERA_HUMAN@81		sp|P11142|HSP7C_HUMAN@315
sp|P21796|VDAC1_HUMAN@73		sp|P46977|STT3A_HUMAN@62		sp|P78527|PRKDC_HUMAN@1864
sp|P30519|HMOX2_HUMAN@250		sp|P62280|RS11_HUMAN@57		sp|O00410|IPO5_HUMAN@701
sp|P00338|LDHA_HUMAN@240		sp|P49368|TCPG_HUMAN@261		sp|P41252|SYIC_HUMAN@873
sp|P49750|YLPM1_HUMAN@769		sp|P18621|RL17_HUMAN@9		sp|Q96T76|MMS19_HUMAN@315
sp|P52272|HNRPM_HUMAN@706		sp|P55060|XPO2_HUMAN@375		sp|Q1KMD3|HNRL2_HUMAN@600
sp|P78527|PRKDC_HUMAN@2895		sp|Q15181|IPYR_HUMAN@271		sp|P07910|HNRPC_HUMAN@304
sp|P18621|RL17_HUMAN@103		sp|P61313|RL15_HUMAN@104		sp|P60842|IF4A1_HUMAN@354
sp|Q04917|1433F_HUMAN@18		sp|P61313|RL15_HUMAN@103		sp|Q9Y678|COPG1_HUMAN@81
sp|P50914|RL14_HUMAN@32		sp|P07900|HS90A_HUMAN@353		sp|P19367|HXK1_HUMAN@321
sp|Q08211|DHX9_HUMAN@1016		sp|Q9BTY7|HGH1_HUMAN@96		sp|Q5JTH9|RRP12_HUMAN@742
sp|P62195|PRS8_HUMAN@266		sp|Q9NTI5|PDS5B_HUMAN@364		sp|P08670|VIME_HUMAN@112
sp|P56192|SYMC_HUMAN@187		sp|P49411|EFTU_HUMAN@103		sp|A0AVT1|UBA6_HUMAN@806
sp|P31949|S10AB_HUMAN@11		sp|Q14566|MCM6_HUMAN@234		sp|P40926|MDHM_HUMAN@313
sp|P43243|MATR3_HUMAN@215		sp|Q7Z7B1|PIGW_HUMAN@432		sp|Q9BQG0|MBB1A_HUMAN@46
sp|Q9NXF1|TEX10_HUMAN@535		sp|P63261|ACTG_HUMAN@57		sp|P11388|TOP2A_HUMAN@1185
sp|P54136|SYRC_HUMAN@42		sp|Q9BVA1|TBB2B_HUMAN@328		sp|Q3SY69|AL1L2_HUMAN@632
sp|P18124|RL7_HUMAN@229		sp|Q5UIP0|RIF1_HUMAN@2220		sp|P22314|UBA1_HUMAN@813
sp|P46778|RL21_HUMAN@137		sp|P52272|HNRPM_HUMAN@509		sp|O43719|HTSF1_HUMAN@562
sp|Q15233|NONO_HUMAN@233		sp|O95714|HERC2_HUMAN@1206		sp|P26358|DNMT1_HUMAN@912
sp|Q92598|HS105_HUMAN@32		sp|Q14739|LBR_HUMAN@600		sp|O75348|VATG1_HUMAN@43
sp|O75369|FLNB_HUMAN@2040		sp|Q92841|DDX17_HUMAN@265		sp|P78527|PRKDC_HUMAN@2087
REV_sp|Q8NDH2|CC168_HUMAN@2873		sp|P62753|RS6_HUMAN@17		sp|Q13557|KCC2D_HUMAN@13
sp|P57740|NU107_HUMAN@627		sp|P03243|E1B55_ADE05@95		sp|O43149|ZZEF1_HUMAN@2013
sp|Q5VTE0|EF1A3_HUMAN@403		sp|P22087|FBRL_HUMAN@130		sp|Q9BY77|PDIP3_HUMAN@374
REV_sp|Q8TCU6|PREX1_HUMAN@573		sp|P0C7V7|SC11B_HUMAN@61		sp|P61221|ABCE1_HUMAN@163
sp|Q9Y5M8|SRPRB_HUMAN@264		sp|Q13509|TBB3_HUMAN@111		sp|Q12931|TRAP1_HUMAN@392
sp|P30536|TSPO_HUMAN@29		sp|P62857|RS28_HUMAN@52		sp|Q9BWF3|RBM4_HUMAN@126
sp|P22314|UBA1_HUMAN@442		sp|P63261|ACTG_HUMAN@205		sp|Q9H4I3|TRABD_HUMAN@283
sp|P28288|ABCD3_HUMAN@194		sp|Q9Y2X3|NOP58_HUMAN@82		sp|P78527|PRKDC_HUMAN@1416
sp|Q9Y6E2|5MP1_HUMAN@375		sp|Q01105|SET_HUMAN@163		sp|Q01433|AMPD2_HUMAN@85
sp|P78527|PRKDC_HUMAN@1326		sp|Q13509|TBB3_HUMAN@157		sp|Q14657|LAGE3_HUMAN@28
sp|Q9Y3I0|RTCB_HUMAN@135		sp|P62701|RS4X_HUMAN@250		sp|P62753|RS6_HUMAN@208
sp|P54619|AAKG1_HUMAN@296		sp|P62249|RS16_HUMAN@102		sp|O43719|HTSF1_HUMAN@646
sp|P10809|CH60_HUMAN@423		sp|P11586|C1TC_HUMAN@205		sp|Q9NQ55|SSF1_HUMAN@361
sp|Q86VP6|CAND1_HUMAN@1190		sp|O00116|ADAS_HUMAN@180		sp|P57740|NU107_HUMAN@396
sp|P63261|ACTG_HUMAN@107		sp|P42167|LAP2B_HUMAN@379		sp|P62937|PPIA_HUMAN@43
sp|Q5JTH9|RRP12_HUMAN@747		sp|Q00839|HNRPU_HUMAN@630		sp|P62333|PRS10_HUMAN@59
sp|P56182|RRP1_HUMAN@183		sp|P08238|HS90B_HUMAN@173		sp|Q71DI3|H32_HUMAN@74
sp|Q15021|CND1_HUMAN@445		sp|P10809|CH60_HUMAN@520		sp|P51570|GALK1_HUMAN@257
sp|P05023|AT1A1_HUMAN@721		sp|Q13509|TBB3_HUMAN@295		sp|Q92973|TNPO1_HUMAN@322
sp|Q05639|EF1A2_HUMAN@48		sp|P22314|UBA1_HUMAN@813		sp|Q9NY65|TBA8_HUMAN@429
sp|P10809|CH60_HUMAN@411		sp|P13639|EF2_HUMAN@510		sp|Q6NXE6|ARMC6_HUMAN@281
sp|P52888|THOP1_HUMAN@406		sp|Q8N1F7|NUP93_HUMAN@729		sp|P61978|HNRPK_HUMAN@29
sp|P07437|TBB5_HUMAN@27		sp|P41252|SYIC_HUMAN@317		sp|Q13724|MOGS_HUMAN@501
sp|Q9Y673|ALG5_HUMAN@165		sp|P07355|ANXA2_HUMAN@14		sp|P38646|GRP75_HUMAN@372
sp|P55060|XPO2_HUMAN@725		REV_sp|Q8NF91|SYNE1_HUMAN@7330		sp|P53618|COPB_HUMAN@470
sp|Q9BQG0|MBB1A_HUMAN@940		sp|P08559|ODPA_HUMAN@133		sp|Q5HYK3|COQ5_HUMAN@158
sp|P07355|ANXA2_HUMAN@82		sp|P05388|RLA0_HUMAN@70		sp|Q99536|VAT1_HUMAN@390
sp|P11586|C1TC_HUMAN@552		REV_sp|Q15700|DLG2_HUMAN@703		sp|P22102|PUR2_HUMAN@688
sp|P62805|H4_HUMAN@54		sp|Q7Z4Q2|HEAT3_HUMAN@53		sp|Q7L0Y3|TM10C_HUMAN@88
sp|Q13509|TBB3_HUMAN@161		sp|P25705|ATPA_HUMAN@139		sp|P06748|NPM_HUMAN@245
sp|P05387|RLA2_HUMAN@52		sp|Q10567|AP1B1_HUMAN@133		sp|P49790|NU153_HUMAN@64
sp|P17812|PYRG1_HUMAN@507		sp|P25705|ATPA_HUMAN@67		sp|P78527|PRKDC_HUMAN@3460
sp|P49368|TCPG_HUMAN@340		sp|P0DMV9|HS71B_HUMAN@555		sp|Q15758|AAAT_HUMAN@253
sp|P18621|RL17_HUMAN@99		sp|Q9P2R7|SUCB1_HUMAN@211		sp|Q63HN8|RN213_HUMAN@1412
sp|Q8TC07|TBC15_HUMAN@31		sp|Q9H9S3|S61A2_HUMAN@104		sp|P50763|VE1_HPV28@262
sp|P00403|COX2_HUMAN@147		sp|P50990|TCPQ_HUMAN@483		sp|O14717|TRDMT_HUMAN@245
sp|P62263|RS14_HUMAN@131		sp|Q14694|UBP10_HUMAN@389		sp|Q14204|DYHC1_HUMAN@2558
sp|P13804|ETFA_HUMAN@198		sp|Q9Y678|COPG1_HUMAN@36		sp|P12235|ADT1_HUMAN@144
sp|Q13509|TBB3_HUMAN@343		sp|Q9BQE3|TBA1C_HUMAN@77		sp|Q9BRP1|PDD2L_HUMAN@247
sp|P0CG38|POTEI_HUMAN@725		sp|P35998|PRS7_HUMAN@107		sp|P48552|NRIP1_HUMAN@514
sp|Q8N1F7|NUP93_HUMAN@347		sp|P27635|RL10_HUMAN@182		sp|Q99497|PARK7_HUMAN@18
sp|P43246|MSH2_HUMAN@925		sp|Q15388|TOM20_HUMAN@64		sp|Q96HS1|PGAM5_HUMAN@84
sp|Q92878|RAD50_HUMAN@75		sp|P27348|1433T_HUMAN@39		REV_sp|Q9BV73|CP250_HUMAN@1345
sp|Q9Y232|CDYL_HUMAN@568		sp|Q00839|HNRPU_HUMAN@580		sp|P35998|PRS7_HUMAN@294
sp|P10809|CH60_HUMAN@486		sp|P26641|EF1G_HUMAN@408		sp|O00411|RPOM_HUMAN@964
sp|P78527|PRKDC_HUMAN@814		sp|Q9ULE4|F184B_HUMAN@353		sp|P46100|ATRX_HUMAN@1525
sp|P35520|CBS_HUMAN@9		sp|P78527|PRKDC_HUMAN@3371		sp|P61204|ARF3_HUMAN@115
sp|P27635|RL10_HUMAN@146		sp|P30048|PRDX3_HUMAN@227		sp|Q6S8J3|POTEE_HUMAN@953
sp|P62195|PRS8_HUMAN@268		sp|P20537|PG042_VACCC@272		sp|P06576|ATPB_HUMAN@402
sp|P04075|ALDOA_HUMAN@247		sp|Q01581|HMCS1_HUMAN@95		sp|O00161|SNP23_HUMAN@75
sp|Q92945|FUBP2_HUMAN@377		sp|P05023|AT1A1_HUMAN@642		sp|Q9Y5T4|DJC15_HUMAN@89
sp|P52272|HNRPM_HUMAN@402		sp|P40937|RFC5_HUMAN@193		sp|P46459|NSF_HUMAN@610
sp|P10809|CH60_HUMAN@215		sp|P38606|VATA_HUMAN@466		sp|P42704|LPPRC_HUMAN@984
sp|Q02040|AK17A_HUMAN@539		sp|P62937|PPIA_HUMAN@86		sp|Q07955|SRSF1_HUMAN@80
sp|Q5JRX3|PREP_HUMAN@82		sp|Q9H4I3|TRABD_HUMAN@283		sp|P51970|NDUA8_HUMAN@149
sp|P12235|ADT1_HUMAN@159		sp|O43175|SERA_HUMAN@387		sp|P39023|RL3_HUMAN@311
sp|Q12931|TRAP1_HUMAN@395		sp|Q9BRX8|PXL2A_HUMAN@90		sp|O15027|SC16A_HUMAN@2289
sp|Q6P2E9|EDC4_HUMAN@969		sp|P56192|SYMC_HUMAN@808		sp|P03243|E1B55_ADE05@86
sp|O14654|IRS4_HUMAN@1041		sp|P00338|LDHA_HUMAN@221		sp|P61289|PSME3_HUMAN@169
sp|O94761|RECQ4_HUMAN@74		sp|P49588|SYAC_HUMAN@472		sp|O00541|PESC_HUMAN@257
sp|P10809|CH60_HUMAN@107		REV_sp|Q5VW36|FOCAD_HUMAN@1068		sp|Q9NRX5|SERC1_HUMAN@369
sp|Q14739|LBR_HUMAN@282		sp|P35613|BASI_HUMAN@352		sp|Q9BWD1|THIC_HUMAN@334
sp|P35658|NU214_HUMAN@1005		sp|Q13148|TADBP_HUMAN@89		sp|Q9NRX1|PNO1_HUMAN@40
sp|P33993|MCM7_HUMAN@313		sp|O60264|SMCA5_HUMAN@169		sp|P61163|ACTZ_HUMAN@231
sp|Q9Y2Q3|GSTK1_HUMAN@130		sp|Q14204|DYHC1_HUMAN@2566		sp|P55786|PSA_HUMAN@742
sp|P52701|MSH6_HUMAN@493		sp|Q9BXJ9|NAA15_HUMAN@819		sp|P53618|COPB_HUMAN@315
sp|P63261|ACTG_HUMAN@253		sp|Q96FA7|ZB10P_HUMAN@143		sp|Q5T4S7|UBR4_HUMAN@1934
sp|P18583|SON_HUMAN@2107		sp|Q12769|NU160_HUMAN@953		sp|P54687|BCAT1_HUMAN@20
sp|P78527|PRKDC_HUMAN@2894		sp|P27708|PYR1_HUMAN@1046		sp|P27635|RL10_HUMAN@109
sp|P15374|UCHL3_HUMAN@149		sp|P49368|TCPG_HUMAN@388		sp|Q96CS3|FAF2_HUMAN@53
sp|P35250|RFC2_HUMAN@54		sp|Q9Y5Y2|NUBP2_HUMAN@73		sp|P46778|RL21_HUMAN@38
sp|P61978|HNRPK_HUMAN@85		sp|P17066|HSP76_HUMAN@50		sp|Q5T200|ZC3HD_HUMAN@1054
sp|P62937|PPIA_HUMAN@34		sp|P62333|PRS10_HUMAN@302		sp|Q96I99|SUCB2_HUMAN@264
sp|O00410|IPO5_HUMAN@677		sp|P17980|PRS6A_HUMAN@213		sp|Q14247|SRC8_HUMAN@241
sp|Q6P158|DHX57_HUMAN@124		sp|P07437|TBB5_HUMAN@288		sp|Q7L014|DDX46_HUMAN@726
sp|P24539|AT5F1_HUMAN@137		sp|P49411|EFTU_HUMAN@320		sp|P27708|PYR1_HUMAN@1040
sp|P49411|EFTU_HUMAN@283		sp|Q92973|TNPO1_HUMAN@332		sp|P12268|IMDH2_HUMAN@132
sp|Q99497|PARK7_HUMAN@84		sp|P62937|PPIA_HUMAN@43		sp|Q71UI9|H2AV_HUMAN@95
sp|P05023|AT1A1_HUMAN@639		sp|P49411|EFTU_HUMAN@104		sp|P0DPI2|GAL3A_HUMAN@149
sp|P49411|EFTU_HUMAN@86		sp|P07900|HS90A_HUMAN@196		sp|O43242|PSMD3_HUMAN@509
sp|P14625|ENPL_HUMAN@103		sp|P04843|RPN1_HUMAN@99		sp|Q9BQG0|MBB1A_HUMAN@940
sp|Q02878|RL6_HUMAN@229		sp|P18621|RL17_HUMAN@110		sp|Q8TBC4|UBA3_HUMAN@20
sp|Q9BQE3|TBA1C_HUMAN@46		sp|Q14690|RRP5_HUMAN@451		sp|P48634|PRC2A_HUMAN@431
sp|Q9Y696|CLIC4_HUMAN@239		sp|P05141|ADT2_HUMAN@144		sp|P50990|TCPQ_HUMAN@548
sp|P49427|UB2R1_HUMAN@26		sp|Q9H0K1|SIK2_HUMAN@613		sp|P30837|AL1B1_HUMAN@431
sp|P14618|KPYM_HUMAN@36		sp|Q9UQ35|SRRM2_HUMAN@1023		sp|P05388|RLA0_HUMAN@97
sp|Q7Z5G4|GOGA7_HUMAN@58		sp|Q9Y2W1|TR150_HUMAN@590		sp|Q9UH90|FBX40_HUMAN@555
sp|P04406|G3P_HUMAN@317		sp|Q08211|DHX9_HUMAN@455		sp|Q05639|EF1A2_HUMAN@135
sp|Q9BQE3|TBA1C_HUMAN@55		sp|P57678|GEMI4_HUMAN@1046		sp|Q9P2X3|IMPCT_HUMAN@160
sp|Q9H254|SPTN4_HUMAN@641		sp|Q8NE00|TM104_HUMAN@196		sp|Q99832|TCPH_HUMAN@386
sp|P62753|RS6_HUMAN@43		sp|P07437|TBB5_HUMAN@295		sp|O75947|ATP5H_HUMAN@71
sp|P78527|PRKDC_HUMAN@2651		sp|P51570|GALK1_HUMAN@80		sp|Q6AI08|HEAT6_HUMAN@638
sp|P53985|MOT1_HUMAN@296		sp|P17812|PYRG1_HUMAN@505		sp|P10809|CH60_HUMAN@215
sp|P05388|RLA0_HUMAN@76		sp|P03246|E1BS_ADE05@148		sp|P42345|MTOR_HUMAN@358
sp|Q8N1F7|NUP93_HUMAN@115		sp|Q9Y5M8|SRPRB_HUMAN@262		sp|P46109|CRKL_HUMAN@140
sp|Q9UL46|PSME2_HUMAN@137		sp|Q9Y5B9|SP16H_HUMAN@798		sp|P78371|TCPB_HUMAN@17
sp|P43243|MATR3_HUMAN@251		sp|Q9Y285|SYFA_HUMAN@498		sp|P16615|AT2A2_HUMAN@645
sp|Q9H0A0|NAT10_HUMAN@911		sp|Q9Y5B9|SP16H_HUMAN@793		sp|O43808|PM34_HUMAN@139
sp|O43837|IDH3B_HUMAN@177		sp|P10809|CH60_HUMAN@108		sp|Q92466|DDB2_HUMAN@31
sp|P10809|CH60_HUMAN@65		sp|O14980|XPO1_HUMAN@338		sp|P51610|HCFC1_HUMAN@1855
sp|Q86XI2|CNDG2_HUMAN@435		sp|P18085|ARF4_HUMAN@106		sp|O00767|SCD_HUMAN@63
sp|P23396|RS3_HUMAN@85		sp|Q9P2X0|DPM3_HUMAN@73		sp|Q9Y5B9|SP16H_HUMAN@210
sp|P08195|4F2_HUMAN@150		sp|P11586|C1TC_HUMAN@321		sp|P20700|LMNB1_HUMAN@113
sp|P08559|ODPA_HUMAN@137		sp|Q8NC56|LEMD2_HUMAN@341		sp|Q00839|HNRPU_HUMAN@463
sp|P16403|H12_HUMAN@42		sp|Q9UMS0|NFU1_HUMAN@191		sp|P10809|CH60_HUMAN@107
sp|P16403|H12_HUMAN@74		sp|P50402|EMD_HUMAN@220		sp|P50990|TCPQ_HUMAN@228
sp|O00541|PESC_HUMAN@251		sp|P05023|AT1A1_HUMAN@238		sp|Q13085|ACACA_HUMAN@2226
sp|P11586|C1TC_HUMAN@204		sp|P78527|PRKDC_HUMAN@3460		sp|P78527|PRKDC_HUMAN@2894
sp|P42704|LPPRC_HUMAN@326		sp|P49792|RBP2_HUMAN@2586		REV_sp|Q9HD67|MYO10_HUMAN@67
sp|P50991|TCPD_HUMAN@3		sp|P55060|XPO2_HUMAN@378		sp|Q8WZ42|TITIN_HUMAN@12484
sp|Q5JVF3|PCID2_HUMAN@48		sp|P50990|TCPQ_HUMAN@159		sp|Q08211|DHX9_HUMAN@831
sp|P26641|EF1G_HUMAN@217		sp|P46459|NSF_HUMAN@522		sp|P28066|PSA5_HUMAN@175
sp|Q8TD47|RS4Y2_HUMAN@251		sp|Q96GX2|A7L3B_HUMAN@65		sp|Q9NV35|NUD15_HUMAN@143
sp|O00311|CDC7_HUMAN@221		sp|Q8N6R0|EFNMT_HUMAN@248		sp|O14646|CHD1_HUMAN@392
sp|P49189|AL9A1_HUMAN@254		sp|Q08211|DHX9_HUMAN@847		sp|P38606|VATA_HUMAN@529
sp|P07900|HS90A_HUMAN@192		sp|Q13509|TBB3_HUMAN@288		sp|Q15424|SAFB1_HUMAN@305
sp|Q9Y2X3|NOP58_HUMAN@479		sp|Q9BQE3|TBA1C_HUMAN@279		sp|Q9HC36|MRM3_HUMAN@411
sp|P39023|RL3_HUMAN@306		sp|P62851|RS25_HUMAN@75		sp|O14732|IMPA2_HUMAN@81
sp|P68371|TBB4B_HUMAN@74		sp|P54136|SYRC_HUMAN@16		sp|Q8NFH5|NUP35_HUMAN@250
sp|Q14980|NUMA1_HUMAN@900		sp|P62753|RS6_HUMAN@19		sp|Q14152|EIF3A_HUMAN@87
sp|Q9Y5B9|SP16H_HUMAN@796		sp|Q9UBF2|COPG2_HUMAN@36		sp|Q6P1A2|MBOA5_HUMAN@215
sp|Q5VTE0|EF1A3_HUMAN@389		sp|P50914|RL14_HUMAN@8		sp|P23378|GCSP_HUMAN@62
sp|Q8WVV9|HNRLL_HUMAN@467		sp|Q96MC5|MERB1_HUMAN@137		sp|Q99848|EBP2_HUMAN@99
sp|O43175|SERA_HUMAN@242		sp|Q15424|SAFB1_HUMAN@485		sp|Q9BXW9|FACD2_HUMAN@719
sp|Q6NZY4|ZCHC8_HUMAN@87		sp|P10809|CH60_HUMAN@111		sp|Q9UNL2|SSRG_HUMAN@108
sp|P06576|ATPB_HUMAN@154		sp|Q99497|PARK7_HUMAN@18		sp|P09382|LEG1_HUMAN@124
sp|Q6DRA6|H2B2D_HUMAN@77		sp|O00244|ATOX1_HUMAN@17		sp|Q14241|ELOA1_HUMAN@520
sp|P61247|RS3A_HUMAN@89		sp|P08195|4F2_HUMAN@154		sp|Q14204|DYHC1_HUMAN@2389
sp|Q13838|DX39B_HUMAN@405		sp|Q96ER3|SAAL1_HUMAN@414		sp|P17812|PYRG1_HUMAN@577
sp|P62269|RS18_HUMAN@63		sp|Q15007|FL2D_HUMAN@264		sp|Q9BXW9|FACD2_HUMAN@123
sp|Q14008|CKAP5_HUMAN@1659		sp|P63261|ACTG_HUMAN@316		sp|P20339|RAB5A_HUMAN@185
sp|Q8IY81|SPB1_HUMAN@219		sp|P36578|RL4_HUMAN@65		sp|P45880|VDAC2_HUMAN@70
sp|P46779|RL28_HUMAN@56		sp|Q13509|TBB3_HUMAN@69		sp|Q13885|TBB2A_HUMAN@295
sp|P22314|UBA1_HUMAN@811		sp|P10809|CH60_HUMAN@379		sp|Q9Y4A5|TRRAP_HUMAN@572
sp|Q9NZB2|F120A_HUMAN@517		sp|P35998|PRS7_HUMAN@294		sp|P78527|PRKDC_HUMAN@261
sp|Q12769|NU160_HUMAN@950		sp|P62987|RL40_HUMAN@24		sp|Q15393|SF3B3_HUMAN@1198
sp|P61978|HNRPK_HUMAN@428		sp|P62241|RS8_HUMAN@163		sp|Q969Q0|RL36L_HUMAN@74
sp|Q9UNL2|SSRG_HUMAN@93		sp|P06748|NPM_HUMAN@39		sp|Q14137|BOP1_HUMAN@112
sp|P12004|PCNA_HUMAN@55		sp|P18621|RL17_HUMAN@31		sp|Q5SW79|CE170_HUMAN@398
sp|P18124|RL7_HUMAN@86		sp|Q8WZ42|TITIN_HUMAN@12486		sp|P18583|SON_HUMAN@954
sp|P62241|RS8_HUMAN@191		sp|Q9UL40|ZN346_HUMAN@27		sp|Q9H0A0|NAT10_HUMAN@478
sp|P24752|THIL_HUMAN@77		sp|P53985|MOT1_HUMAN@225		sp|Q15003|CND2_HUMAN@684
sp|P62263|RS14_HUMAN@138		sp|P23396|RS3_HUMAN@216		sp|Q9BQA1|MEP50_HUMAN@4
sp|O95373|IPO7_HUMAN@552		sp|Q5VTE0|EF1A3_HUMAN@268		sp|Q8NCX0|CC150_HUMAN@176
sp|P52272|HNRPM_HUMAN@700		sp|P50990|TCPQ_HUMAN@454		sp|A6NMY6|AXA2L_HUMAN@34
sp|Q5JNZ5|RS26L_HUMAN@46		sp|P14618|KPYM_HUMAN@304		sp|Q13868|EXOS2_HUMAN@61
sp|P78527|PRKDC_HUMAN@3823		sp|Q12906|ILF3_HUMAN@199		sp|Q8TAW3|ZN671_HUMAN@5748
sp|P46779|RL28_HUMAN@52		sp|P78527|PRKDC_HUMAN@2988		sp|Q14204|DYHC1_HUMAN@1620
sp|Q99879|H2B1M_HUMAN@106		sp|Q96AE4|FUBP1_HUMAN@330		sp|P52272|HNRPM_HUMAN@624
sp|Q9BVP2|GNL3_HUMAN@433		sp|Q9BXJ9|NAA15_HUMAN@641		sp|Q9NRF2|SH2B1_HUMAN@77
sp|Q99567|NUP88_HUMAN@516		sp|Q9Y2X3|NOP58_HUMAN@91		sp|P28340|DPOD1_HUMAN@1033
sp|Q6PGP7|SKI3_HUMAN@111		sp|O14654|IRS4_HUMAN@1081		sp|Q9UL40|ZN346_HUMAN@46
sp|P42677|RS27_HUMAN@15		sp|Q96FW1|OTUB1_HUMAN@150		sp|P48382|RFX5_HUMAN@141
sp|Q14137|BOP1_HUMAN@112		sp|P10809|CH60_HUMAN@167		sp|P55265|DSRAD_HUMAN@1147
sp|Q13428|TCOF_HUMAN@1326		sp|O00567|NOP56_HUMAN@222		sp|Q9HAV4|XPO5_HUMAN@1120
sp|P26373|RL13_HUMAN@143		sp|P39023|RL3_HUMAN@311		sp|O00541|PESC_HUMAN@501
sp|Q13885|TBB2A_HUMAN@328		sp|Q9Y266|NUDC_HUMAN@282		sp|P78527|PRKDC_HUMAN@3309
sp|P55769|NH2L1_HUMAN@124		sp|Q9Y5B9|SP16H_HUMAN@591		sp|O15127|SCAM2_HUMAN@100
sp|P04406|G3P_HUMAN@189		sp|Q9BQE3|TBA1C_HUMAN@116		sp|P61247|RS3A_HUMAN@90
sp|P50990|TCPQ_HUMAN@226		sp|P50991|TCPD_HUMAN@400		sp|P46013|KI67_HUMAN@2557
sp|P12268|IMDH2_HUMAN@449		sp|O14654|IRS4_HUMAN@1079		sp|P50990|TCPQ_HUMAN@394
sp|Q06830|PRDX1_HUMAN@171		sp|P17987|TCPA_HUMAN@66		sp|P25705|ATPA_HUMAN@159
sp|P16615|AT2A2_HUMAN@646		sp|P61009|SPCS3_HUMAN@52		sp|Q00839|HNRPU_HUMAN@472
sp|P05023|AT1A1_HUMAN@221		sp|P78527|PRKDC_HUMAN@2537		sp|Q9H7E9|CH033_HUMAN@63
sp|P25705|ATPA_HUMAN@145		sp|O00541|PESC_HUMAN@257		sp|Q8N0X7|SPART_HUMAN@347
sp|Q8WUM4|PDC6I_HUMAN@45		sp|P11172|UMPS_HUMAN@154		sp|P78527|PRKDC_HUMAN@2960
sp|P46977|STT3A_HUMAN@434		sp|P62269|RS18_HUMAN@65		sp|Q3ZCQ8|TIM50_HUMAN@58
sp|P17987|TCPA_HUMAN@434		sp|Q9P2X3|IMPCT_HUMAN@168		sp|Q96E39|RMXL1_HUMAN@211
sp|P40937|RFC5_HUMAN@192		sp|P51784|UBP11_HUMAN@582		sp|Q9Y678|COPG1_HUMAN@568
sp|Q07020|RL18_HUMAN@129		sp|P30519|HMOX2_HUMAN@250		sp|O43719|HTSF1_HUMAN@698
sp|Q13185|CBX3_HUMAN@179		sp|P52272|HNRPM_HUMAN@455		sp|Q9P016|THYN1_HUMAN@30
sp|Q96HS1|PGAM5_HUMAN@38		sp|P49750|YLPM1_HUMAN@769		sp|P78527|PRKDC_HUMAN@241
sp|P0CG38|POTEI_HUMAN@1064		sp|P68371|TBB4B_HUMAN@69		sp|P52701|MSH6_HUMAN@533
sp|P07437|TBB5_HUMAN@53		sp|P52272|HNRPM_HUMAN@706		sp|O00401|WASL_HUMAN@439
sp|P07900|HS90A_HUMAN@547		sp|Q16513|PKN2_HUMAN@456		sp|Q6XQI4|L_JUNIN@1428
sp|P13010|XRCC5_HUMAN@474		sp|P18621|RL17_HUMAN@103		sp|A6NDU8|RIMC1_HUMAN@276
sp|Q92616|GCN1_HUMAN@1232		sp|P03246|E1BS_ADE05@154		sp|Q01780|EXOSX_HUMAN@762
sp|Q9H063|MAF1_HUMAN@86		sp|P49792|RBP2_HUMAN@254		sp|P55060|XPO2_HUMAN@359
sp|Q8NCM8|DYHC2_HUMAN@1304		sp|P12268|IMDH2_HUMAN@111		sp|Q7Z6K5|ARPIN_HUMAN@211
REV_sp|Q8TCU6|PREX1_HUMAN@702		sp|P50914|RL14_HUMAN@32		sp|Q8IZ69|TRM2A_HUMAN@344
sp|Q8NE71|ABCF1_HUMAN@593		sp|Q6NUQ4|TM214_HUMAN@449		sp|P30837|AL1B1_HUMAN@415
sp|P78527|PRKDC_HUMAN@2713		sp|P62195|PRS8_HUMAN@266		sp|P19338|NUCL_HUMAN@340
sp|Q9BQE3|TBA1C_HUMAN@97		sp|Q9H425|CA198_HUMAN@71		sp|Q9NY93|DDX56_HUMAN@122
sp|P23396|RS3_HUMAN@38		sp|P50990|TCPQ_HUMAN@38		sp|Q5T9A4|ATD3B_HUMAN@523
sp|P13929|ENOB_HUMAN@45		sp|Q07666|KHDR1_HUMAN@130		sp|Q8NI60|COQ8A_HUMAN@305
sp|Q8TCT9|HM13_HUMAN@68		sp|P31949|S10AB_HUMAN@11		sp|P50570|DYN2_HUMAN@255
REV_sp|Q6AWC2|WWC2_HUMAN@209		sp|P56192|SYMC_HUMAN@187		sp|Q9BZE4|GTPB4_HUMAN@121
REV_sp|A0A1B0GTZ2|CC196_HUMAN@176		sp|Q02880|TOP2B_HUMAN@108		sp|Q96BQ5|CC127_HUMAN@255
sp|Q9BTM1|H2AJ_HUMAN@42		sp|P52701|MSH6_HUMAN@1311		sp|Q02978|M2OM_HUMAN@258
sp|P18621|RL17_HUMAN@163		sp|Q9NXF1|TEX10_HUMAN@535		sp|Q9BZE9|ASPC1_HUMAN@89
sp|P14866|HNRPL_HUMAN@479		sp|P54136|SYRC_HUMAN@42		sp|P21796|VDAC1_HUMAN@50
sp|Q99986|VRK1_HUMAN@73		sp|Q9NRX5|SERC1_HUMAN@378		sp|P54136|SYRC_HUMAN@388
sp|Q14204|DYHC1_HUMAN@1246		sp|P18124|RL7_HUMAN@229		sp|O75746|S2512_HUMAN@402
sp|P06576|ATPB_HUMAN@150		sp|Q9BQG0|MBB1A_HUMAN@335		sp|Q9UN37|VPS4A_HUMAN@240
sp|Q13885|TBB2A_HUMAN@53		sp|P46778|RL21_HUMAN@137		sp|Q9UI10|EI2BD_HUMAN@368
sp|P23396|RS3_HUMAN@28		sp|P31946|1433B_HUMAN@19		sp|Q9NR09|BIRC6_HUMAN@2306
sp|P54886|P5CS_HUMAN@157		sp|Q9BVA1|TBB2B_HUMAN@125		sp|P78527|PRKDC_HUMAN@3435
sp|Q9NVP1|DDX18_HUMAN@629		sp|Q92598|HS105_HUMAN@32		sp|P37268|FDFT_HUMAN@222
sp|Q01081|U2AF1_HUMAN@63		sp|O75369|FLNB_HUMAN@2040		sp|Q9UG63|ABCF2_HUMAN@49
sp|P11586|C1TC_HUMAN@203		sp|Q01105|SET_HUMAN@46		sp|Q9H9L3|I20L2_HUMAN@165
sp|P50990|TCPQ_HUMAN@394		sp|P57740|NU107_HUMAN@627		sp|P07814|SYEP_HUMAN@1398
sp|P11586|C1TC_HUMAN@255		sp|P62753|RS6_HUMAN@39		sp|Q9Y678|COPG1_HUMAN@486
sp|Q92616|GCN1_HUMAN@2270		sp|Q9Y5M8|SRPRB_HUMAN@264		sp|Q9NZB2|F120A_HUMAN@1106
sp|P25705|ATPA_HUMAN@159		sp|P28288|ABCD3_HUMAN@194		sp|Q9NYH9|UTP6_HUMAN@455
sp|Q02543|RL18A_HUMAN@130		sp|Q9Y6E2|5MP1_HUMAN@375		sp|P78527|PRKDC_HUMAN@404
sp|P16615|AT2A2_HUMAN@113		sp|P50991|TCPD_HUMAN@159		sp|Q9BSJ2|GCP2_HUMAN@474
sp|Q14166|TTL12_HUMAN@30		sp|Q9Y3I0|RTCB_HUMAN@135		sp|Q99426|TBCB_HUMAN@89
sp|P63261|ACTG_HUMAN@99		sp|P83436|COG7_HUMAN@310		sp|Q15386|UBE3C_HUMAN@775
sp|Q9H9B4|SFXN1_HUMAN@301		sp|Q14204|DYHC1_HUMAN@603		sp|Q15758|AAAT_HUMAN@182
sp|P10809|CH60_HUMAN@181		sp|P54619|AAKG1_HUMAN@296		sp|P51610|HCFC1_HUMAN@1157
sp|P24752|THIL_HUMAN@234		sp|P10809|CH60_HUMAN@423		REV_sp|O75116|ROCK2_HUMAN@971
sp|Q07020|RL18_HUMAN@124		sp|Q86VP6|CAND1_HUMAN@1190		sp|Q14204|DYHC1_HUMAN@3469
sp|Q9BQB6|VKOR1_HUMAN@44		sp|P36578|RL4_HUMAN@13		sp|Q13395|TARB1_HUMAN@243
sp|Q9Y2X3|NOP58_HUMAN@231		sp|P63261|ACTG_HUMAN@107		sp|Q5VZL5|ZMYM4_HUMAN@1533
sp|P40937|RFC5_HUMAN@191		sp|Q5JTH9|RRP12_HUMAN@747		sp|P07814|SYEP_HUMAN@1468
sp|Q13509|TBB3_HUMAN@67		sp|P62249|RS16_HUMAN@43		sp|P13639|EF2_HUMAN@674
sp|P13639|EF2_HUMAN@837		sp|P56182|RRP1_HUMAN@183		sp|P42167|LAP2B_HUMAN@316
		sp|P62333|PRS10_HUMAN@205		sp|P49915|GUAA_HUMAN@16
		sp|Q05639|EF1A2_HUMAN@48		sp|O15294|OGT1_HUMAN@649
		sp|P05023|AT1A1_HUMAN@721		sp|P51970|NDUA8_HUMAN@124
		sp|Q15021|CND1_HUMAN@445		sp|P25705|ATPA_HUMAN@152
		sp|Q15021|CND1_HUMAN@443		sp|Q96A65|EXOC4_HUMAN@476
		sp|O00170|AIP_HUMAN@116		sp|Q8NB37|GALD1_HUMAN@170
		sp|P62244|RS15A_HUMAN@18		sp|Q15233|NONO_HUMAN@462
		sp|Q14247|SRC8_HUMAN@241		sp|P46977|STT3A_HUMAN@439
		sp|Q6UB35|C1TM_HUMAN@581		sp|P12270|TPR_HUMAN@71
		sp|P25705|ATPA_HUMAN@56		sp|P43243|MATR3_HUMAN@262
		sp|P18621|RL17_HUMAN@162		sp|Q9BSJ2|GCP2_HUMAN@544
		sp|P12268|IMDH2_HUMAN@132		sp|P17655|CAN2_HUMAN@633
		sp|P10809|CH60_HUMAN@411		sp|Q14204|DYHC1_HUMAN@4148
		sp|Q9NU22|MDN1_HUMAN@225		sp|Q16576|RBBP7_HUMAN@103
		sp|P52888|THOP1_HUMAN@406		sp|Q86VP6|CAND1_HUMAN@1188
		sp|Q71UI9|H2AV_HUMAN@96		sp|Q9NRZ7|PLCC_HUMAN@362
		sp|Q15758|AAAT_HUMAN@497		sp|P07900|HS90A_HUMAN@651
		sp|Q9Y673|ALG5_HUMAN@165		sp|Q15269|PWP2_HUMAN@737
		sp|P04181|OAT_HUMAN@45		sp|Q9Y3I0|RTCB_HUMAN@341
		sp|Q7Z434|MAVS_HUMAN@5		sp|P07900|HS90A_HUMAN@350
		sp|P55060|XPO2_HUMAN@725		sp|Q14690|RRP5_HUMAN@885
		sp|Q9BQG0|MBB1A_HUMAN@940		sp|Q9H307|PININ_HUMAN@221
		sp|P07355|ANXA2_HUMAN@82		sp|Q9Y6E2|5MP1_HUMAN@274
		sp|Q4G0J3|LARP7_HUMAN@463		sp|Q9H9E3|COG4_HUMAN@216
		sp|O60762|DPM1_HUMAN@79		sp|P12268|IMDH2_HUMAN@510
		sp|P0DMV9|HS71B_HUMAN@528		sp|P46782|RS5_HUMAN@70
		sp|P40938|RFC3_HUMAN@21		sp|Q9Y3T9|NOC2L_HUMAN@641
		sp|Q9BQE3|TBA1C_HUMAN@76		sp|Q86VM9|ZCH18_HUMAN@346
		sp|P11586|C1TC_HUMAN@552		sp|O43719|HTSF1_HUMAN@711
		sp|P62805|H4_HUMAN@54		sp|P08865|RSSA_HUMAN@69
		sp|P21964|COMT_HUMAN@252		sp|P26196|DDX6_HUMAN@89
		sp|Q13509|TBB3_HUMAN@161		sp|Q13885|TBB2A_HUMAN@327
		sp|P05387|RLA2_HUMAN@52		sp|P21796|VDAC1_HUMAN@36
		sp|P17812|PYRG1_HUMAN@507		sp|P07814|SYEP_HUMAN@189
		sp|P10809|CH60_HUMAN@188		sp|Q9H2G2|SLK_HUMAN@350
		sp|P49368|TCPG_HUMAN@340		sp|P43243|MATR3_HUMAN@249
		sp|P18621|RL17_HUMAN@99		sp|Q8ND82|Z280C_HUMAN@96
		sp|Q8TC07|TBC15_HUMAN@31		sp|Q14974|IMB1_HUMAN@512
		sp|P55265|DSRAD_HUMAN@993		sp|Q9NQR4|NIT2_HUMAN@119
		sp|P00403|COX2_HUMAN@147		sp|P26373|RL13_HUMAN@80
		sp|Q86YN1|DOPP1_HUMAN@82		sp|Q15365|PCBP1_HUMAN@320
		sp|P26373|RL13_HUMAN@173		sp|P0DPI2|GAL3A_HUMAN@199
		sp|P55060|XPO2_HUMAN@380		sp|O43760|SNG2_HUMAN@137
		sp|P62263|RS14_HUMAN@131		sp|P27348|1433T_HUMAN@40
		sp|P22626|ROA2_HUMAN@211		sp|P84103|SRSF3_HUMAN@84
		sp|P27635|RL10_HUMAN@35		sp|Q92667|AKAP1_HUMAN@106
		sp|Q9BSD7|NTPCR_HUMAN@68		sp|Q15005|SPCS2_HUMAN@217
		sp|P24539|AT5F1_HUMAN@232		sp|P19338|NUCL_HUMAN@455
		sp|Q13509|TBB3_HUMAN@343		sp|Q16891|MIC60_HUMAN@650
		sp|P46783|RS10_HUMAN@112		sp|Q12906|ILF3_HUMAN@301
		sp|P05388|RLA0_HUMAN@97		sp|P78527|PRKDC_HUMAN@916
		sp|Q9H583|HEAT1_HUMAN@1926		sp|P41252|SYIC_HUMAN@315
		sp|P0CG38|POTEI_HUMAN@725		sp|P83731|RL24_HUMAN@89
		sp|P04843|RPN1_HUMAN@382		sp|P62753|RS6_HUMAN@21
		sp|Q92878|RAD50_HUMAN@75		sp|P35250|RFC2_HUMAN@66
		sp|Q9Y232|CDYL_HUMAN@568		sp|Q9UL46|PSME2_HUMAN@70
		sp|P10809|CH60_HUMAN@486		sp|Q9BVP2|GNL3_HUMAN@198
		sp|Q8NE71|ABCF1_HUMAN@594		sp|P25705|ATPA_HUMAN@224
		sp|P78527|PRKDC_HUMAN@814		sp|P32322|P5CR1_HUMAN@144
		sp|Q8N335|GPD1L_HUMAN@126		sp|Q02224|CENPE_HUMAN@382
		sp|P27635|RL10_HUMAN@146		sp|Q15003|CND2_HUMAN@234
		sp|P62195|PRS8_HUMAN@268		sp|P23528|COF1_HUMAN@51
		sp|Q92945|FUBP2_HUMAN@377		sp|Q9H582|ZN644_HUMAN@490
		sp|Q92621|NU205_HUMAN@1983		sp|P07814|SYEP_HUMAN@762
		sp|Q9UI30|TR112_HUMAN@29		sp|P18031|PTN1_HUMAN@318
		sp|P10809|CH60_HUMAN@215		sp|Q5SRD1|TI23B_HUMAN@58
		sp|P04843|RPN1_HUMAN@376		sp|P35998|PRS7_HUMAN@292
		sp|P56192|SYMC_HUMAN@263		sp|P08670|VIME_HUMAN@191
		sp|P42166|LAP2A_HUMAN@421		sp|Q86W92|LIPB1_HUMAN@53
		sp|P46776|RL27A_HUMAN@102		sp|P51570|GALK1_HUMAN@215
		sp|P23919|KTHY_HUMAN@158		sp|O95816|BAG2_HUMAN@30
		sp|P16615|AT2A2_HUMAN@645		sp|O15164|TIF1A_HUMAN@348
		sp|Q5JRX3|PREP_HUMAN@82		sp|Q9BQG0|MBB1A_HUMAN@712
		sp|P05141|ADT2_HUMAN@30		sp|P62879|GBB2_HUMAN@312
		sp|O14654|IRS4_HUMAN@1041		sp|P49327|FAS_HUMAN@1435
		sp|Q8WUM4|PDC6I_HUMAN@44		sp|Q69YN4|VIR_HUMAN@1557
		sp|P10809|CH60_HUMAN@107		sp|O14654|IRS4_HUMAN@1109
		sp|Q8IUE6|H2A2B_HUMAN@93		sp|P42677|RS27_HUMAN@13
		sp|Q14739|LBR_HUMAN@282		sp|P62917|RL8_HUMAN@36
		sp|P35658|NU214_HUMAN@1005		sp|Q9UQ88|CD11A_HUMAN@703
		sp|P10809|CH60_HUMAN@386		sp|P55957|BID_HUMAN@80
		sp|P18583|SON_HUMAN@2107		sp|Q01650|LAT1_HUMAN@18
		sp|P78527|PRKDC_HUMAN@3361		sp|P17812|PYRG1_HUMAN@312
		sp|P15374|UCHL3_HUMAN@149		sp|Q14204|DYHC1_HUMAN@1984
		sp|P63261|ACTG_HUMAN@253		sp|P35658|NU214_HUMAN@756
		sp|P46977|STT3A_HUMAN@623		sp|Q14204|DYHC1_HUMAN@1886
		sp|P35250|RFC2_HUMAN@54		sp|Q3ZCQ8|TIM50_HUMAN@321
		sp|Q5T9L3|WLS_HUMAN@79		sp|P51570|GALK1_HUMAN@23
		sp|Q9H583|HEAT1_HUMAN@1887		sp|Q9UG63|ABCF2_HUMAN@612
		sp|O00410|IPO5_HUMAN@677		sp|P26373|RL13_HUMAN@171
		sp|P16615|AT2A2_HUMAN@117		sp|P42166|LAP2A_HUMAN@489
		sp|P38117|ETFB_HUMAN@229		sp|O60831|PRAF2_HUMAN@13
		sp|P63244|RACK1_HUMAN@269		sp|Q02790|FKBP4_HUMAN@422
		sp|Q6P158|DHX57_HUMAN@124		sp|Q92538|GBF1_HUMAN@1520
		sp|P49411|EFTU_HUMAN@283		sp|Q9Y3B4|SF3B6_HUMAN@55
		sp|Q14204|DYHC1_HUMAN@2391		sp|Q9H974|QTRT2_HUMAN@182
		sp|Q99497|PARK7_HUMAN@84		sp|Q92621|NU205_HUMAN@216
		sp|P49411|EFTU_HUMAN@86		sp|P40429|RL13A_HUMAN@158
		sp|P78527|PRKDC_HUMAN@849		sp|P05023|AT1A1_HUMAN@687
		sp|P63261|ACTG_HUMAN@100		sp|Q9UBD5|ORC3_HUMAN@283
		sp|P14625|ENPL_HUMAN@103		sp|Q8N2K0|ABD12_HUMAN@13
		sp|P78527|PRKDC_HUMAN@2985		sp|Q02880|TOP2B_HUMAN@593
		sp|Q9BQE3|TBA1C_HUMAN@46		sp|P49792|RBP2_HUMAN@2794
		sp|P08708|RS17_HUMAN@75		sp|P06493|CDK1_HUMAN@41
		sp|Q9Y696|CLIC4_HUMAN@239		sp|Q02241|KIF23_HUMAN@502
		sp|P49427|UB2R1_HUMAN@26		sp|Q9NYP7|ELOV5_HUMAN@106
		sp|Q7Z5G4|GOGA7_HUMAN@58		sp|Q7Z7A1|CNTRL_HUMAN@2010
		sp|P0DMV9|HS71B_HUMAN@556		sp|Q14684|RRP1B_HUMAN@183
		sp|Q9BQE3|TBA1C_HUMAN@55		sp|Q9UL54|TAOK2_HUMAN@220
		sp|P14868|SYDC_HUMAN@163		sp|Q9NRX5|SERC1_HUMAN@366
		sp|O14776|TCRG1_HUMAN@660		sp|O60830|TI17B_HUMAN@149
		sp|P78527|PRKDC_HUMAN@2651		sp|Q9UKX7|NUP50_HUMAN@218
		sp|P53985|MOT1_HUMAN@296		sp|Q9Y2X3|NOP58_HUMAN@228
		sp|P05388|RLA0_HUMAN@76		sp|P30153|2AAA_HUMAN@332
		sp|P43243|MATR3_HUMAN@251		sp|P04843|RPN1_HUMAN@183
		sp|Q9HAV4|XPO5_HUMAN@809		sp|O43709|BUD23_HUMAN@166
		sp|P07900|HS90A_HUMAN@557		sp|P13639|EF2_HUMAN@516
		sp|Q9BYG3|MK67I_HUMAN@272		sp|P61313|RL15_HUMAN@103
		sp|P10809|CH60_HUMAN@65		sp|P09884|DPOLA_HUMAN@681
		sp|Q86XI2|CNDG2_HUMAN@435		sp|Q01105|SET_HUMAN@124
		sp|Q5T4S7|UBR4_HUMAN@1073		sp|Q5UIP0|RIF1_HUMAN@2220
		sp|P23396|RS3_HUMAN@85		sp|Q9Y3D0|CIA2B_HUMAN@33
		sp|P08559|ODPA_HUMAN@137		REV_sp|Q709C8|VP13C_HUMAN@1341
		sp|O75947|ATP5H_HUMAN@103		sp|Q6P2E9|EDC4_HUMAN@1168
		sp|O00541|PESC_HUMAN@251		sp|Q8TCG1|CIP2A_HUMAN@655
		sp|P11586|C1TC_HUMAN@204		sp|Q8N5Y2|MS3L1_HUMAN@363
		sp|Q6PF15|KLH35_HUMAN@13		sp|P52272|HNRPM_HUMAN@477
		sp|P42704|LPPRC_HUMAN@326		sp|P41252|SYIC_HUMAN@849
		sp|P50991|TCPD_HUMAN@3		sp|P62249|RS16_HUMAN@102
		sp|Q14152|EIF3A_HUMAN@87		sp|Q86XI2|CNDG2_HUMAN@698
		sp|Q5JVF3|PCID2_HUMAN@48		sp|Q13098|CSN1_HUMAN@472
		sp|O00767|SCD_HUMAN@208		sp|Q53H96|P5CR3_HUMAN@45
		sp|O00311|CDC7_HUMAN@221		sp|Q00839|HNRPU_HUMAN@630
		sp|P49189|AL9A1_HUMAN@254		sp|P08238|HS90B_HUMAN@173
		sp|P07900|HS90A_HUMAN@192		sp|P24928|RPB1_HUMAN@30
		sp|P27635|RL10_HUMAN@180		sp|P13639|EF2_HUMAN@510
		sp|Q8NC56|LEMD2_HUMAN@351		sp|P41252|SYIC_HUMAN@317
		sp|P39023|RL3_HUMAN@306		sp|P08559|ODPA_HUMAN@133
		sp|Q8TEQ6|GEMI5_HUMAN@1348		sp|Q9Y4G6|TLN2_HUMAN@1125
		sp|Q9BVA1|TBB2B_HUMAN@157		sp|P33316|DUT_HUMAN@108
		sp|P83731|RL24_HUMAN@66		sp|P00966|ASSY_HUMAN@104
		sp|O00567|NOP56_HUMAN@233		sp|O94788|AL1A2_HUMAN@114
		sp|Q14980|NUMA1_HUMAN@900		sp|Q9BW92|SYTM_HUMAN@593
		sp|Q5VTE0|EF1A3_HUMAN@389		sp|P46060|RAGP1_HUMAN@467
		sp|P05141|ADT2_HUMAN@104		sp|P20700|LMNB1_HUMAN@251
		sp|Q9BQE3|TBA1C_HUMAN@218		sp|O60306|AQR_HUMAN@671
		sp|P08195|4F2_HUMAN@212		sp|P27708|PYR1_HUMAN@1246
		sp|O43175|SERA_HUMAN@242		sp|Q14061|COX17_HUMAN@16
		sp|Q9BXW9|FACD2_HUMAN@719		sp|P60174|TPIS_HUMAN@220
		sp|P06576|ATPB_HUMAN@154		sp|P27635|RL10_HUMAN@56
		sp|O94966|UBP19_HUMAN@1189		sp|Q9NQC3|RTN4_HUMAN@1080
		sp|O95299|NDUAA_HUMAN@251		sp|Q9BRV8|SIKE1_HUMAN@174
		sp|Q6DRA6|H2B2D_HUMAN@77		sp|Q9NY65|TBA8_HUMAN@218
		sp|P61247|RS3A_HUMAN@89		sp|Q96A65|EXOC4_HUMAN@477
		sp|Q13838|DX39B_HUMAN@405		sp|P07437|TBB5_HUMAN@288
		sp|P62269|RS18_HUMAN@63		sp|P09543|CN37_HUMAN@123
		sp|Q8IY81|SPB1_HUMAN@219		sp|P78527|PRKDC_HUMAN@17
		sp|P46977|STT3A_HUMAN@563		sp|P04843|RPN1_HUMAN@498
		sp|P46779|RL28_HUMAN@56		sp|P49411|EFTU_HUMAN@104
		sp|O00469|PLOD2_HUMAN@442		sp|P49368|TCPG_HUMAN@82
		sp|P22314|UBA1_HUMAN@811		sp|Q8IWN7|RP1L1_HUMAN@795
		sp|Q9NZB2|F120A_HUMAN@517		sp|Q9P2X0|DPM3_HUMAN@73
		sp|P63261|ACTG_HUMAN@334		sp|Q15629|TRAM1_HUMAN@325
		sp|Q12769|NU160_HUMAN@950		sp|Q86VP6|CAND1_HUMAN@1019
		sp|P25705|ATPA_HUMAN@69		sp|P50851|LRBA_HUMAN@1805
		sp|P61978|HNRPK_HUMAN@428		REV_sp|Q8IUL8|CILP2_HUMAN@1060
		sp|P18124|RL7_HUMAN@86		sp|O75717|WDHD1_HUMAN@814
		sp|P62241|RS8_HUMAN@191		sp|O75694|NU155_HUMAN@36
		sp|P52597|HNRPF_HUMAN@211		sp|P03246|E1BS_ADE05@8
		sp|Q2HR83|ORF49_HHV8P@253		sp|P51149|RAB7A_HUMAN@163
		sp|P24752|THIL_HUMAN@77		sp|P27708|PYR1_HUMAN@359
		sp|P62263|RS14_HUMAN@138		sp|P53396|ACLY_HUMAN@781
		sp|P49411|EFTU_HUMAN@233		sp|P25788|PSA3_HUMAN@32
		sp|P00403|COX2_HUMAN@139		sp|Q13509|TBB3_HUMAN@69
		sp|P30153|2AAA_HUMAN@23		sp|Q13428|TCOF_HUMAN@89
		sp|O95373|IPO7_HUMAN@552		sp|Q04323|UBXN1_HUMAN@256
		sp|P41252|SYIC_HUMAN@795		sp|O00567|NOP56_HUMAN@222
		sp|Q8NE86|MCU_HUMAN@118		sp|Q13509|TBB3_HUMAN@3
		sp|P52272|HNRPM_HUMAN@700		sp|P30154|2AAB_HUMAN@35
		sp|Q5JNZ5|RS26L_HUMAN@46		sp|O15397|IPO8_HUMAN@553
		sp|Q9Y6E2|5MP1_HUMAN@40		sp|Q9HCC0|MCCB_HUMAN@414
		sp|P78527|PRKDC_HUMAN@3823		sp|P61247|RS3A_HUMAN@23
		sp|P46779|RL28_HUMAN@52		sp|P11172|UMPS_HUMAN@154
		sp|P55060|XPO2_HUMAN@476		REV_sp|Q92974|ARHG2_HUMAN@497
		sp|Q99567|NUP88_HUMAN@516		sp|P55795|HNRH2_HUMAN@324
		sp|P33993|MCM7_HUMAN@681		sp|Q92621|NU205_HUMAN@1531
		sp|Q6UB35|C1TM_HUMAN@197		REV_sp|P49736|MCM2_HUMAN@494
		sp|Q9UG63|ABCF2_HUMAN@613		sp|Q92616|GCN1_HUMAN@1225
		sp|P42677|RS27_HUMAN@15		sp|Q9NRL2|BAZ1A_HUMAN@1403
		sp|Q14137|BOP1_HUMAN@112		sp|P78527|PRKDC_HUMAN@808
		sp|Q13428|TCOF_HUMAN@1326		sp|Q9HAV4|XPO5_HUMAN@445
		sp|P43686|PRS6B_HUMAN@14		sp|O00567|NOP56_HUMAN@332
		sp|P26373|RL13_HUMAN@143		sp|O76074|PDE5A_HUMAN@77
		sp|P46781|RS9_HUMAN@89		sp|Q13435|SF3B2_HUMAN@518
		sp|Q13155|AIMP2_HUMAN@47		sp|Q86UV5|UBP48_HUMAN@371
		sp|Q9BQE3|TBA1C_HUMAN@69		sp|P03243|E1B55_ADE05@144
		sp|P55769|NH2L1_HUMAN@124		sp|P35580|MYH10_HUMAN@213
		sp|P50990|TCPQ_HUMAN@226		sp|P57740|NU107_HUMAN@627
		sp|P12268|IMDH2_HUMAN@449		sp|Q8ND04|SMG8_HUMAN@84
		sp|Q9NU22|MDN1_HUMAN@3788		sp|O95785|WIZ_HUMAN@1297
		sp|P13639|EF2_HUMAN@65		sp|Q96N66|MBOA7_HUMAN@297
		sp|Q06830|PRDX1_HUMAN@171		sp|P12004|PCNA_HUMAN@113
		sp|Q9Y673|ALG5_HUMAN@203		sp|Q14204|DYHC1_HUMAN@603
		sp|P46777|RL5_HUMAN@189		sp|P38159|RBMX_HUMAN@90
		sp|P04406|G3P_HUMAN@189		sp|O00165|HAX1_HUMAN@148
		sp|P05023|AT1A1_HUMAN@221		sp|O94776|MTA2_HUMAN@523
		sp|Q53H12|AGK_HUMAN@414		sp|Q9H9A6|LRC40_HUMAN@61
		sp|Q13509|TBB3_HUMAN@249		sp|P43243|MATR3_HUMAN@210
		sp|P50402|EMD_HUMAN@80		sp|Q6XQN6|PNCB_HUMAN@410
		sp|P31949|S10AB_HUMAN@9		sp|Q15021|CND1_HUMAN@445
		sp|P25705|ATPA_HUMAN@145		sp|P05023|AT1A1_HUMAN@721
		sp|Q8WUM4|PDC6I_HUMAN@45		sp|O60762|DPM1_HUMAN@182
		sp|Q9NVI1|FANCI_HUMAN@442		sp|O00170|AIP_HUMAN@116
		sp|P46977|STT3A_HUMAN@434		sp|P10809|CH60_HUMAN@411
		sp|P17987|TCPA_HUMAN@434		sp|Q8N3X1|FNBP4_HUMAN@593
		sp|Q6YHU6|THADA_HUMAN@1577		sp|Q12996|CSTF3_HUMAN@669
		sp|Q07020|RL18_HUMAN@129		sp|P41250|GARS_HUMAN@727
		sp|P10155|RO60_HUMAN@59		sp|Q96HE7|ERO1A_HUMAN@24
		sp|Q15070|OXA1L_HUMAN@353		sp|P62805|H4_HUMAN@54
		sp|Q8WXF1|PSPC1_HUMAN@191		sp|P26373|RL13_HUMAN@173
		sp|Q96HS1|PGAM5_HUMAN@38		REV_sp|Q9H6N6|MYH16_HUMAN@1908
		sp|Q13185|CBX3_HUMAN@179		sp|Q5UIP0|RIF1_HUMAN@2373
		sp|P0CG38|POTEI_HUMAN@1064		sp|P78559|MAP1A_HUMAN@2742
		sp|P07437|TBB5_HUMAN@53		sp|P38117|ETFB_HUMAN@243
		sp|P07900|HS90A_HUMAN@547		sp|O95394|AGM1_HUMAN@193
		sp|Q5JTH9|RRP12_HUMAN@715		sp|P04843|RPN1_HUMAN@382
		sp|P46459|NSF_HUMAN@311		sp|P08238|HS90B_HUMAN@345
		sp|Q16778|H2B2E_HUMAN@52		sp|Q6ZMI0|PPR21_HUMAN@103
		sp|Q92616|GCN1_HUMAN@1232		sp|Q8WUK0|PTPM1_HUMAN@63
		sp|Q9H063|MAF1_HUMAN@86		sp|P09874|PARP1_HUMAN@90
		sp|P78527|PRKDC_HUMAN@513		sp|Q6YHU6|THADA_HUMAN@1566
		sp|O60264|SMCA5_HUMAN@81		sp|Q01105|SET_HUMAN@155
		sp|Q9Y679|AUP1_HUMAN@238		sp|Q92621|NU205_HUMAN@1983
		sp|Q8NCM8|DYHC2_HUMAN@1304		sp|O43759|SNG1_HUMAN@145
		sp|P38117|ETFB_HUMAN@97		sp|P13639|EF2_HUMAN@63
		sp|Q9HAV4|XPO5_HUMAN@1120		sp|A6NNZ2|TBB8B_HUMAN@157
		sp|Q05639|EF1A2_HUMAN@252		sp|Q8WUM4|PDC6I_HUMAN@44
		sp|Q9H9B4|SFXN1_HUMAN@312		sp|Q9Y2Q3|GSTK1_HUMAN@130
		sp|Q8NE71|ABCF1_HUMAN@593		sp|P53985|MOT1_HUMAN@418
		sp|O96000|NDUBA_HUMAN@122		sp|Q9H583|HEAT1_HUMAN@1662
		sp|P67775|PP2AA_HUMAN@42		sp|P54136|SYRC_HUMAN@17
		sp|P78527|PRKDC_HUMAN@239		sp|Q9Y2R4|DDX52_HUMAN@24
		sp|P16615|AT2A2_HUMAN@658		sp|Q5T9L3|WLS_HUMAN@79
		sp|Q53H12|AGK_HUMAN@186		sp|O60812|HNRC1_HUMAN@282
		sp|Q9BQE3|TBA1C_HUMAN@97		sp|Q9BVP2|GNL3_HUMAN@107
		sp|P23396|RS3_HUMAN@38		sp|P07900|HS90A_HUMAN@451
		sp|Q8TCT9|HM13_HUMAN@68		sp|Q13572|ITPK1_HUMAN@344
		sp|P15374|UCHL3_HUMAN@10		sp|Q3ZCQ8|TIM50_HUMAN@105
		sp|P07814|SYEP_HUMAN@1368		sp|Q02978|M2OM_HUMAN@174
		sp|P18621|RL17_HUMAN@163		sp|P24539|AT5F1_HUMAN@137
		sp|Q14204|DYHC1_HUMAN@3776		sp|Q9GZT9|EGLN1_HUMAN@143
		sp|Q99986|VRK1_HUMAN@73		sp|Q92616|GCN1_HUMAN@28
		sp|Q14204|DYHC1_HUMAN@1246		sp|P12956|XRCC6_HUMAN@21
		sp|P78527|PRKDC_HUMAN@3309		sp|O60830|TI17B_HUMAN@87
		sp|O60343|TBCD4_HUMAN@311		sp|P53396|ACLY_HUMAN@458
		sp|P30519|HMOX2_HUMAN@251		sp|Q9BXW9|FACD2_HUMAN@888
		sp|P06576|ATPB_HUMAN@150		sp|P0DMV9|HS71B_HUMAN@639
		sp|P56192|SYMC_HUMAN@811		sp|P28340|DPOD1_HUMAN@920
		sp|P53618|COPB_HUMAN@490		sp|Q14C86|GAPD1_HUMAN@78
		sp|P54886|P5CS_HUMAN@157		sp|Q9HAV4|XPO5_HUMAN@809
		sp|Q9BQE3|TBA1C_HUMAN@423		sp|O43837|IDH3B_HUMAN@177
		sp|Q99832|TCPH_HUMAN@415		sp|Q9H6R3|ACSS3_HUMAN@426
		sp|Q9NVP1|DDX18_HUMAN@629		sp|Q15233|NONO_HUMAN@194
		sp|Q01081|U2AF1_HUMAN@63		sp|Q6IAA8|LTOR1_HUMAN@50
		sp|P55060|XPO2_HUMAN@829		sp|P48444|COPD_HUMAN@123
		sp|P61247|RS3A_HUMAN@90		sp|P46013|KI67_HUMAN@2853
		sp|Q9H3G5|CPVL_HUMAN@197		sp|Q86TI2|DPP9_HUMAN@838
		sp|Q9Y3T9|NOC2L_HUMAN@629		sp|Q9NWV8|BABA1_HUMAN@200
		sp|P11586|C1TC_HUMAN@203		sp|P08195|4F2_HUMAN@212
		sp|P50990|TCPQ_HUMAN@394		sp|Q86VP6|CAND1_HUMAN@824
		sp|P78527|PRKDC_HUMAN@4100		sp|A0FGR8|ESYT2_HUMAN@372
		sp|P18621|RL17_HUMAN@161		sp|Q6P158|DHX57_HUMAN@517
		sp|P62263|RS14_HUMAN@87		sp|Q9Y4F5|C170B_HUMAN@109
		sp|Q14318|FKBP8_HUMAN@324		sp|Q9Y289|SC5A6_HUMAN@598
		sp|P02768|ALBU_HUMAN@449		sp|Q9H939|PPIP2_HUMAN@37
		sp|P52597|HNRPF_HUMAN@320		sp|P41252|SYIC_HUMAN@795
		sp|P25705|ATPA_HUMAN@159		sp|Q8NE86|MCU_HUMAN@118
		sp|Q96IX5|ATPMK_HUMAN@5		sp|Q9Y6E2|5MP1_HUMAN@40
		sp|P16615|AT2A2_HUMAN@113		sp|Q9HC52|CBX8_HUMAN@348
		sp|Q15005|SPCS2_HUMAN@222		sp|Q8N394|TMTC2_HUMAN@707
		sp|Q14166|TTL12_HUMAN@30		sp|Q6P1X5|TAF2_HUMAN@547
		sp|P63261|ACTG_HUMAN@99		sp|P10155|RO60_HUMAN@56
		sp|P10809|CH60_HUMAN@181		sp|P46459|NSF_HUMAN@590
		sp|P24752|THIL_HUMAN@234		sp|Q8WWQ0|PHIP_HUMAN@713
		sp|Q9H9B4|SFXN1_HUMAN@299		REV_sp|P89455|UL32_HHV2H@24
		sp|P78527|PRKDC_HUMAN@2904		sp|Q14204|DYHC1_HUMAN@1725
		sp|Q07020|RL18_HUMAN@124		sp|Q92817|EVPL_HUMAN@892
		sp|Q9BQB6|VKOR1_HUMAN@44		sp|Q8IZE3|PACE1_HUMAN@155
		sp|P62269|RS18_HUMAN@21		sp|P42704|LPPRC_HUMAN@912
		sp|P78527|PRKDC_HUMAN@2960		sp|P16615|AT2A2_HUMAN@658
		sp|O14654|IRS4_HUMAN@1077		sp|Q96A33|CCD47_HUMAN@414
		sp|Q07666|KHDR1_HUMAN@190		sp|Q96C36|P5CR2_HUMAN@273
		sp|P08195|4F2_HUMAN@152		sp|P84098|RL19_HUMAN@160
		sp|P13639|EF2_HUMAN@837		sp|Q9BPX3|CND3_HUMAN@685
		sp|Q9Y2X3|NOP58_HUMAN@231		sp|P78527|PRKDC_HUMAN@1821
		sp|P08670|VIME_HUMAN@134		sp|P16615|AT2A2_HUMAN@605
		sp|P61978|HNRPK_HUMAN@41		sp|Q9Y2X3|NOP58_HUMAN@200
				sp|Q9Y243|AKT3_HUMAN@275
				sp|Q93034|CUL5_HUMAN@131
				sp|Q14318|FKBP8_HUMAN@324
				sp|Q9Y6E2|5MP1_HUMAN@53
				sp|Q9UL46|PSME2_HUMAN@134
				sp|O75964|ATP5L_HUMAN@45
				sp|O15381|NVL_HUMAN@527
				sp|Q9HCU5|PREB_HUMAN@125
				sp|Q13283|G3BP1_HUMAN@329
				sp|O75691|UTP20_HUMAN@1817
				sp|Q8WTT2|NOC3L_HUMAN@340
				sp|Q15269|PWP2_HUMAN@780
				sp|Q6WCQ1|MPRIP_HUMAN@975
				sp|P62280|RS11_HUMAN@52
				sp|O43719|HTSF1_HUMAN@715
				sp|Q86XI2|CNDG2_HUMAN@508
				sp|P36542|ATPG_HUMAN@249
				sp|P78527|PRKDC_HUMAN@168
				sp|P78527|PRKDC_HUMAN@2115
				sp|Q14160|SCRIB_HUMAN@40
				sp|P46013|KI67_HUMAN@652
				sp|Q9Y4D8|HECD4_HUMAN@1817
				sp|P51148|RAB5C_HUMAN@204
				sp|Q02880|TOP2B_HUMAN@524
				sp|O00165|HAX1_HUMAN@237
				sp|O14980|XPO1_HUMAN@1024
				sp|P78527|PRKDC_HUMAN@3219
				sp|Q99496|RING2_HUMAN@288
				sp|Q15020|SART3_HUMAN@661
				sp|P28066|PSA5_HUMAN@207
				sp|Q92616|GCN1_HUMAN@2158
				sp|Q14204|DYHC1_HUMAN@855
				sp|Q08211|DHX9_HUMAN@936
				REV_sp|Q7Z406|MYH14_HUMAN@577
				sp|P08621|RU17_HUMAN@113
				sp|Q86X55|CARM1_HUMAN@332
				sp|Q92841|DDX17_HUMAN@539
				sp|Q9H583|HEAT1_HUMAN@1166
				sp|Q5JTH9|RRP12_HUMAN@1111
				sp|Q08211|DHX9_HUMAN@1125
				sp|P13010|XRCC5_HUMAN@199
				sp|Q9NP80|PLPL8_HUMAN@733
				sp|Q3ZCQ8|TIM50_HUMAN@292
				sp|P61978|HNRPK_HUMAN@432
				sp|P23526|SAHH_HUMAN@197
				sp|P52789|HXK2_HUMAN@752
				sp|P42166|LAP2A_HUMAN@505
				sp|Q12906|ILF3_HUMAN@187
				sp|P05141|ADT2_HUMAN@11
				sp|P17987|TCPA_HUMAN@106
				sp|P34931|HS71L_HUMAN@530
				sp|Q14204|DYHC1_HUMAN@2556
				sp|P28340|DPOD1_HUMAN@980
				sp|P04181|OAT_HUMAN@342
				sp|Q14204|DYHC1_HUMAN@2388
				sp|Q92538|GBF1_HUMAN@1532
				sp|P27816|MAP4_HUMAN@672
				sp|M0R2J8|DCDC1_HUMAN@1079
				sp|Q9UJZ1|STML2_HUMAN@123
				sp|Q13263|TIF1B_HUMAN@326
				sp|P62753|RS6_HUMAN@57
				sp|O95340|PAPS2_HUMAN@521
				REV_sp|Q8N8Z6|DCBD1_HUMAN@268
				sp|O15027|SC16A_HUMAN@2262
				sp|O95292|VAPB_HUMAN@179
				sp|Q96ER3|SAAL1_HUMAN@208
				sp|Q9NZ01|TECR_HUMAN@5
				sp|P19338|NUCL_HUMAN@407
				sp|Q9BW71|HIRP3_HUMAN@55
				sp|Q9HAU5|RENT2_HUMAN@981
				sp|P12268|IMDH2_HUMAN@421
				sp|P49368|TCPG_HUMAN@351
				sp|P09211|GSTP1_HUMAN@37
				sp|P61978|HNRPK_HUMAN@382
				sp|Q9H582|ZN644_HUMAN@486
				sp|Q5TEC6|H37_HUMAN@74
				sp|Q9BQG0|MBB1A_HUMAN@709
				sp|Q08211|DHX9_HUMAN@822
				sp|P49790|NU153_HUMAN@91
				sp|Q9Y6G9|DC1L1_HUMAN@317
				sp|P78527|PRKDC_HUMAN@2710
				sp|Q8TD19|NEK9_HUMAN@860
				sp|Q07869|PPARA_HUMAN@286
				sp|Q9UDX5|MTFP1_HUMAN@65
				sp|Q15070|OXA1L_HUMAN@351
				sp|O95373|IPO7_HUMAN@1007
				sp|P31689|DNJA1_HUMAN@53
				sp|P05388|RLA0_HUMAN@93
				sp|Q14643|ITPR1_HUMAN@143
				sp|P43686|PRS6B_HUMAN@234
				sp|Q5IFJ7|RL9_MACFA@183
				sp|P61604|CH10_HUMAN@75
				sp|P10809|CH60_HUMAN@76
				sp|P78527|PRKDC_HUMAN@2114
				sp|Q14839|CHD4_HUMAN@1182
				sp|Q14204|DYHC1_HUMAN@2063
				sp|P49327|FAS_HUMAN@1768
				sp|P08195|4F2_HUMAN@604
				sp|Q9C0F1|CEP44_HUMAN@14
				sp|P61247|RS3A_HUMAN@191
				sp|P36897|TGFR1_HUMAN@110
				sp|Q3SY69|AL1L2_HUMAN@789
				sp|P00390|GSHR_HUMAN@49
				sp|P04632|CPNS1_HUMAN@184
				sp|P10809|CH60_HUMAN@504
				sp|O76031|CLPX_HUMAN@359
				sp|Q969Q0|RL36L_HUMAN@96
				sp|O43264|ZW10_HUMAN@672
				sp|Q9BVP2|GNL3_HUMAN@104
				sp|P42695|CNDD3_HUMAN@451
				sp|Q5H9F3|BCORL_HUMAN@898
				sp|Q9NQT5|EXOS3_HUMAN@41
				sp|Q5UIP0|RIF1_HUMAN@2218
				sp|O95870|ABHGA_HUMAN@430
				sp|P78527|PRKDC_HUMAN@1907
				sp|P35613|BASI_HUMAN@358
				sp|Q02878|RL6_HUMAN@99
				sp|Q96RL1|UIMC1_HUMAN@592
				sp|Q03001|DYST_HUMAN@6562
				sp|Q14974|IMB1_HUMAN@849
				sp|Q09028|RBBP4_HUMAN@104
				sp|Q8NBS9|TXND5_HUMAN@288
				sp|P61978|HNRPK_HUMAN@25
				sp|P52701|MSH6_HUMAN@1237
				REV_sp|Q8WZ42|TITIN_HUMAN@7627
				sp|Q00610|CLH1_HUMAN@1617
				sp|Q13428|TCOF_HUMAN@67
				sp|P52272|HNRPM_HUMAN@605
				sp|Q8WZ42|TITIN_HUMAN@25330
				sp|P05023|AT1A1_HUMAN@717
				sp|P12004|PCNA_HUMAN@58
				sp|P20020|AT2B1_HUMAN@246
				sp|P04844|RPN2_HUMAN@507
				sp|Q02878|RL6_HUMAN@231
				sp|Q14683|SMC1A_HUMAN@157
				sp|O15357|SHIP2_HUMAN@1118
				sp|Q9ULA0|DNPEP_HUMAN@161
				sp|Q9H9B4|SFXN1_HUMAN@210
				sp|Q9ULW0|TPX2_HUMAN@468
				sp|Q9NXE4|NSMA3_HUMAN@673
				sp|O60313|OPA1_HUMAN@565
				sp|Q53GQ0|DHB12_HUMAN@93
				sp|P36542|ATPG_HUMAN@99
				sp|O43264|ZW10_HUMAN@712
				sp|Q9NY65|TBA8_HUMAN@220
				sp|Q8NC51|SERB1_HUMAN@93
				sp|P10412|H14_HUMAN@115
				sp|P68363|TBA1B_HUMAN@71
				sp|P17987|TCPA_HUMAN@47
				sp|P12236|ADT3_HUMAN@159
				sp|Q14839|CHD4_HUMAN@1351
				sp|P05023|AT1A1_HUMAN@892
				sp|Q12789|TF3C1_HUMAN@708
				sp|P55060|XPO2_HUMAN@375
				sp|O75400|PR40A_HUMAN@219
				sp|Q96F63|CCD97_HUMAN@164
				sp|P63244|RACK1_HUMAN@262
				sp|Q13428|TCOF_HUMAN@66
				sp|P08238|HS90B_HUMAN@81
				sp|Q86V81|THOC4_HUMAN@172
				sp|P17655|CAN2_HUMAN@632
				sp|Q13509|TBB3_HUMAN@111
				sp|Q7Z406|MYH14_HUMAN@714
				sp|O60884|DNJA2_HUMAN@256
				sp|P42167|LAP2B_HUMAN@379
				sp|P16615|AT2A2_HUMAN@243
				sp|Q7Z4Q2|HEAT3_HUMAN@53
				sp|P43487|RANG_HUMAN@146
				sp|A6NMY6|AXA2L_HUMAN@16
				sp|O43719|HTSF1_HUMAN@530
				sp|Q14160|SCRIB_HUMAN@70
				sp|Q9BQG0|MBB1A_HUMAN@496
				sp|P38919|IF4A3_HUMAN@199
				sp|P35670|ATP7B_HUMAN@225
				sp|P20700|LMNB1_HUMAN@239
				sp|P23528|COF1_HUMAN@142
				sp|P40937|RFC5_HUMAN@193
				sp|O94901|SUN1_HUMAN@385
				sp|P0DPH8|TBA3D_HUMAN@55
				sp|Q15022|SUZ12_HUMAN@335
				sp|O60264|SMCA5_HUMAN@169
				sp|Q7KZN9|COX15_HUMAN@129
				sp|O43264|ZW10_HUMAN@481
				sp|Q9H9B4|SFXN1_HUMAN@85
				sp|Q92804|RBP56_HUMAN@301
				sp|P53985|MOT1_HUMAN@464
				sp|Q16822|PCKGM_HUMAN@338
				sp|Q6NXE6|ARMC6_HUMAN@342
				sp|P07900|HS90A_HUMAN@196
				sp|O60812|HNRC1_HUMAN@279
				sp|Q99805|TM9S2_HUMAN@103
				sp|O60763|USO1_HUMAN@252
				sp|P07437|TBB5_HUMAN@295
				sp|Q9Y5B9|SP16H_HUMAN@798
				sp|P10809|CH60_HUMAN@108
				sp|P26373|RL13_HUMAN@206
				sp|Q86Y56|DAAF5_HUMAN@815
				sp|Q86UL3|GPAT4_HUMAN@394
				sp|Q9UQ35|SRRM2_HUMAN@1504
				sp|P10809|CH60_HUMAN@111
				sp|O43390|HNRPR_HUMAN@432
				sp|Q14204|DYHC1_HUMAN@128
				sp|Q9UBI6|GBG12_HUMAN@60
				REV_sp|P16615|AT2A2_HUMAN@329
				sp|Q08211|DHX9_HUMAN@700
				sp|O60287|NPA1P_HUMAN@590
				sp|O75190|DNJB6_HUMAN@102
				sp|Q8N257|H2B3B_HUMAN@114
				sp|P07910|HNRPC_HUMAN@273
				sp|Q96SN8|CK5P2_HUMAN@467
				sp|P09110|THIK_HUMAN@267
				sp|O75717|WDHD1_HUMAN@818
				sp|P54886|P5CS_HUMAN@755
				sp|Q9P2R3|ANFY1_HUMAN@48
				sp|P46977|STT3A_HUMAN@614
				sp|Q8N0X7|SPART_HUMAN@421
				sp|Q04917|1433F_HUMAN@18
				sp|Q09666|AHNK_HUMAN@549
				sp|Q02880|TOP2B_HUMAN@108
				sp|Q92547|TOPB1_HUMAN@7
				sp|P42356|PI4KA_HUMAN@422
				sp|O60287|NPA1P_HUMAN@634
				sp|Q96CS3|FAF2_HUMAN@15
				REV_sp|Q15149|PLEC_HUMAN@2137
				sp|Q9Y5M8|SRPRB_HUMAN@264
				sp|P30536|TSPO_HUMAN@29
				sp|Q8NC51|SERB1_HUMAN@22
				sp|P50991|TCPD_HUMAN@159
				sp|Q9NRD8|DUOX2_HUMAN@857
				sp|Q3SY69|AL1L2_HUMAN@217
				sp|P78527|PRKDC_HUMAN@2946
				sp|P39023|RL3_HUMAN@80
				sp|P68871|HBB_HUMAN@23
				REV_sp|Q2M1P5|KIF7_HUMAN@977
				sp|Q01813|PFKAP_HUMAN@404
				sp|O60841|IF2P_HUMAN@854
				sp|Q86TV6|TTC7B_HUMAN@741
				sp|P20585|MSH3_HUMAN@120
				REV_sp|Q86YQ8|CPNE8_HUMAN@538
				REV_sp|Q5TB80|CE162_HUMAN@1250
				sp|Q9NZ01|TECR_HUMAN@62
				sp|O14524|NEMP1_HUMAN@272
				sp|Q5VWX1|KHDR2_HUMAN@94
				sp|Q14980|NUMA1_HUMAN@2002
				sp|Q9NVH1|DJC11_HUMAN@456
				sp|Q5T1M5|FKB15_HUMAN@1082
				sp|P42695|CNDD3_HUMAN@533
				sp|P13804|ETFA_HUMAN@325
				sp|P62241|RS8_HUMAN@134
				sp|P62195|PRS8_HUMAN@268
				sp|P39687|AN32A_HUMAN@21
				sp|Q86YS7|C2CD5_HUMAN@856
				sp|P36716|CAPSP_ADE12@40
				sp|Q9UBS8|RNF14_HUMAN@392
				sp|P61962|DCAF7_HUMAN@41
				sp|P25705|ATPA_HUMAN@436
				sp|Q96I99|SUCB2_HUMAN@394
				sp|Q15003|CND2_HUMAN@147
				sp|P35658|NU214_HUMAN@1005
				sp|Q8NF37|PCAT1_HUMAN@346
				sp|P35250|RFC2_HUMAN@54
				sp|Q9NU22|MDN1_HUMAN@1049
				sp|Q6GYQ0|RGPA1_HUMAN@259
				sp|Q96QR8|PURB_HUMAN@30
				sp|P40938|RFC3_HUMAN@203
				sp|P05023|AT1A1_HUMAN@601
				sp|Q9H2H9|S38A1_HUMAN@59
				sp|P38117|ETFB_HUMAN@229
				sp|Q92547|TOPB1_HUMAN@18
				sp|Q6P3X3|TTC27_HUMAN@224
				sp|P46199|IF2M_HUMAN@294
[truncated: 4,027 more rows]

## Sheet: 34
set1		set2		set3
[truncated: 3,081 more rows]

## Sheet: 36
set1		set2		set3
[truncated: 1,271 more rows]

[truncated: 36 more sheets: 39, 46, 48, 50, 55, IPM_r1, IPM_r2, IPM_r3, NHS-r1, NHS-r2, NHS-r3, Az9_r1, Az9_r2, Az9_r3, 34_r1, 34_r2, 34_r3, 36_r1, 36_r2, 36_r3 …]
